# Supplementary material for: A sodium channel inhibitor ISTX-I with a novel structure provides a new hint at the evolutionary link between two toxin folds
Source: PubMed Central journal article supplement (PMC4942781; doi:10.1038/srep29691), 2016-07-13
Supplement: srep29691-s1.pdf [file srep29691-s1.pdf]

# **A sodium channel inhibitor ISTX-I with novel structure provides a new hint at the evolutionary link between two toxin folds**

Mingqiang Rong<sup>1§</sup>, Jiangxin Liu<sup>2§</sup>, Meilin Zhang<sup>1§</sup>, Gan Wang<sup>3</sup>, Gang Zhao<sup>4</sup>, Guodong Wang<sup>5</sup>, Yaping Zhang<sup>5</sup>, Kaifeng Hu<sup>2\*</sup>, and Ren Lai<sup>1,3\*</sup>

## **Supplementary methods**

### **Recombinant expression and purification**

The DNA fragment encoding ISTX-I was PCR-amplified and cloned into a modified pET-32a (+) vector. The construct yields a Trx-His<sub>6</sub>-tagged protein with a TEV site between the tag and the ISTX-I. The Trx-His<sub>6</sub>-tagged ISTX-I was overexpressed in *Escherichia coli* BL21(DE3) cells. Cultures were grown in LB medium at 37 °C until the O.D. 600 reached 0.6. Cells were induced with 0.6 mM isopropyl-thiogalactopyranoside (IPTG) at 37 °C for 4 h and harvested by centrifugation. Recombinant ISTX-I was isolated from the lysate via Ni-NTA purification and digested with TEV protease at room temperature overnight to remove the tag. The ISTX-I protein was further purified with a Sephadex G-50 (Superfine, Amersham Biosciences, 2.6×100 cm) gel filtration column, an AKTA Mono Q (1ml volume, Amersham Biosciences) anion exchange column and a C18 reverse phase high performance liquid chromatography column (Hypersil BDS C18, 30×0.46 cm). Finally, the purified ISTX-I was examined by MALDI-TOF mass spectrometry to confirm its purity and molecular mass.

### **Mass spectrometry**

Matrix-assisted laser desorption ionization time-of-flight (MALDI-TOF) mass spectrometry (Bruker Proflex III) was used to detect the purity and molecular mass of the ISTX-I and its intermediates. MALDI-TOF was performed on a Finnegan Lasermat, and the absorbing matrix used was  $\alpha$ -acyano-4-hydroxy-cinnamic acid. All masses reported are for the monoisotopic M+H<sup>+</sup> ions.

## **Electrophysiological studies.**

Currents were recorded from experimental cells using whole-cell patch clamp technique at room temperature (22–25 °C). The patch pipettes were fabricated from borosilicate glass tubing using a two-stage vertical microelectrode puller (PC-10, Narishige, Japan). After establishing the whole-cell recording configuration, the resting potential was held at –80 mV for at least 5 min to allow adequate equilibration between the micropipette solution and the cell interior. The micropipette solution of sodium currents for dorsal root ganglion neurons contained (in mM): 105 CsF, 35 NaCl, 10 HEPES, 10 EGTA (pH 7.4). The external solution contained (in mM): 50 NaCl, 100 TEA.Cl, 2 KCl, 1.5 CaCl<sub>2</sub>, 10 HEPES, 1 MgCl<sub>2</sub>, and 5 glucose (pH 7.4). K<sup>+</sup> currents were recorded using an internal solution containing the followings (in mM): KCl 140, MgCl<sub>2</sub> 2.5, HEPES 10, and EGTA 11 (pH 7.2). The external bathing solution contained the followings (in mM): NaCl 150, KCl 5, CaCl<sub>2</sub> 25, MgCl<sub>2</sub> 12, HEPES 10, and D-glucose 10 (pH 7.2). Calcium channel currents were measured using Ba<sup>2+</sup> as the charge carrier. The external solution contained (in mM): 160 TEA-Cl, 10 HEPES, 2 BaCl<sub>2</sub>, 10 glucoses, adjusted to pH 7.4 with TEA-OH. The internal solution contained (in mM): 120 CsCl, 5 Mg-ATP, 0.4 Na<sub>2</sub>-GTP, 10 EGTA, 20 HEPES-CsOH, and adjusted to pH 7.2 with CsOH (Lewis et al., 2000). Ionic currents were filtered at 3 kHz and sampled at 20 kHz on EPC-9 patch clamp amplifier (HEKA, Lambrecht, Germany).

## **Supplementary Figure legends**

**Figure S1. Expression, purification and molecular mass determination of recombinant ISTX-I.** A: Separation of ISTX-I by Sephadex G-50 gel filtration. The absorbance of the elution was monitored at 280 nm. Inset: Expression of ISTX-I fusion protein in *E.coli* Rosetta–gami (DE3) and analysis by SDS-PAGE (12%). M, protein molecular weight marker; lanes 1&2, ISTX-I/pET-32a(+) uninduced and induced cells, respectively. B: The protein peak (indicated by an arrow) from Sephadex G-50 gel filtration was subjected to AKTA Resource Q anion exchange chromatography. C: The elution peak (marked by arrow) after Resource Q anion

exchange chromatography was further purified by C<sub>18</sub> RP-HPLC. The elution was performed with a gradient of acetonitrile in 0.1% (v/v) trifluoroacetic acid in water at a flow rate of 0.7 ml/min. D: MALDI-TOF mass spectrometry analysis of recombinant ISTX-I after the TEV digestion and purification.

**Figure S2. Mass spectrometry of partially reduced intermediates of ISTX-I.A:**

Molecular mass of intact ISTX-I (peak 1). Molecular mass of peak 2 (B) peak3 ( C ) and peak 4(D). Molecular mass of alkylated peak 2 (E) and 3 (F).

**Figure S3. Effects of ISTX-I on subtypes of sodium channel expressed in HEK293 cells.**

Cells were held at -80 mV for over 4 min and then the current traces were evoked using a 50 ms step depolarization to -10 mV every second. No effect on the hNav1.1 (A), hNav1.2 (B), hNav1.3 (C), hNav1.4 (D), hNav1.5 (E) and hNav1.6 (F), (G)hNav1.8.

**Figure S4. Effects of ISTX-I on Kv currents and Cav currents of DRG neurons.**

For record Kv currents, cell were evoked by a 500 ms depolarized potential of +10 mV from a holding potential same as recording Nav currents. For record Cav currents, cells were activated by a 150 ms step depolarization to +10 mV from a holding potential of -90 mV. No effects were detected on potassium channel (A) and calcium channel (B).

**Fig S1**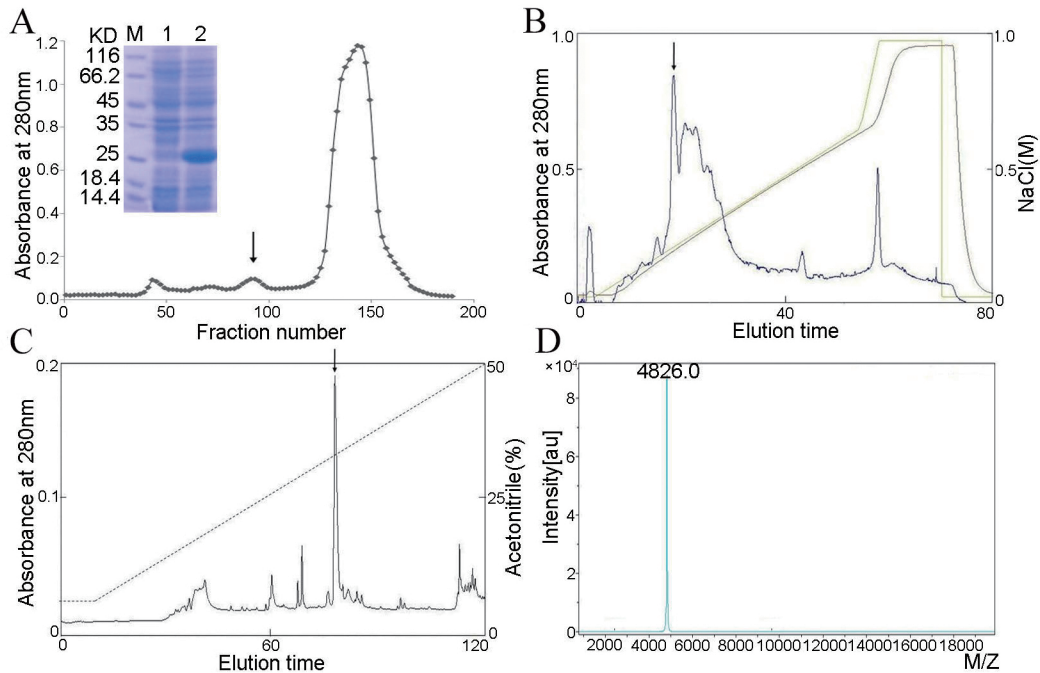

# Fig S2

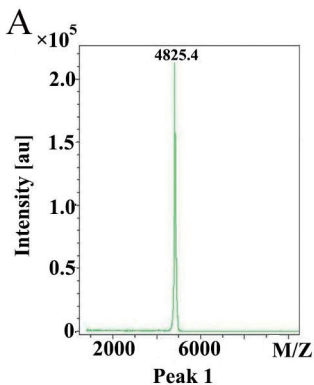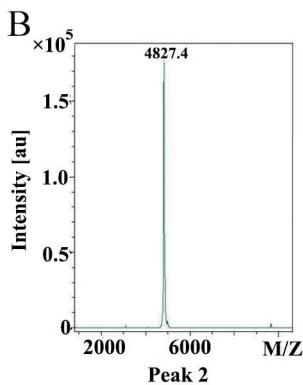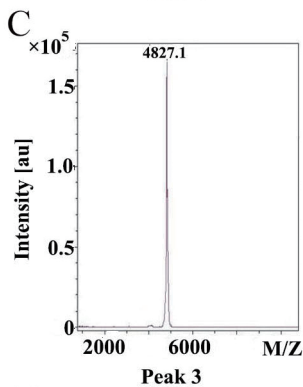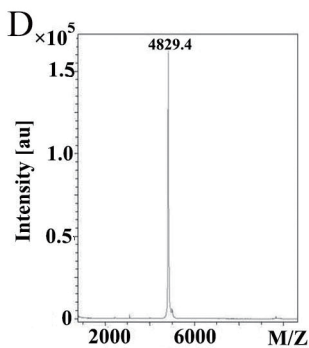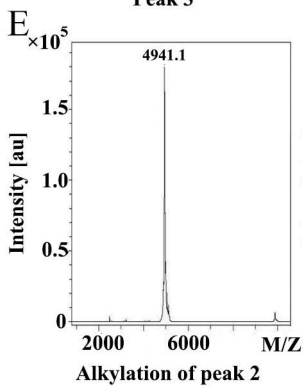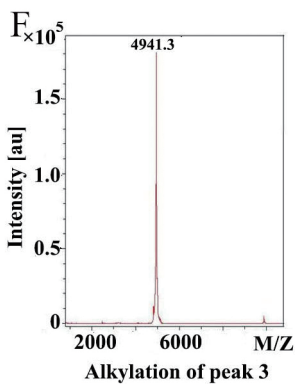

**Fig S3**

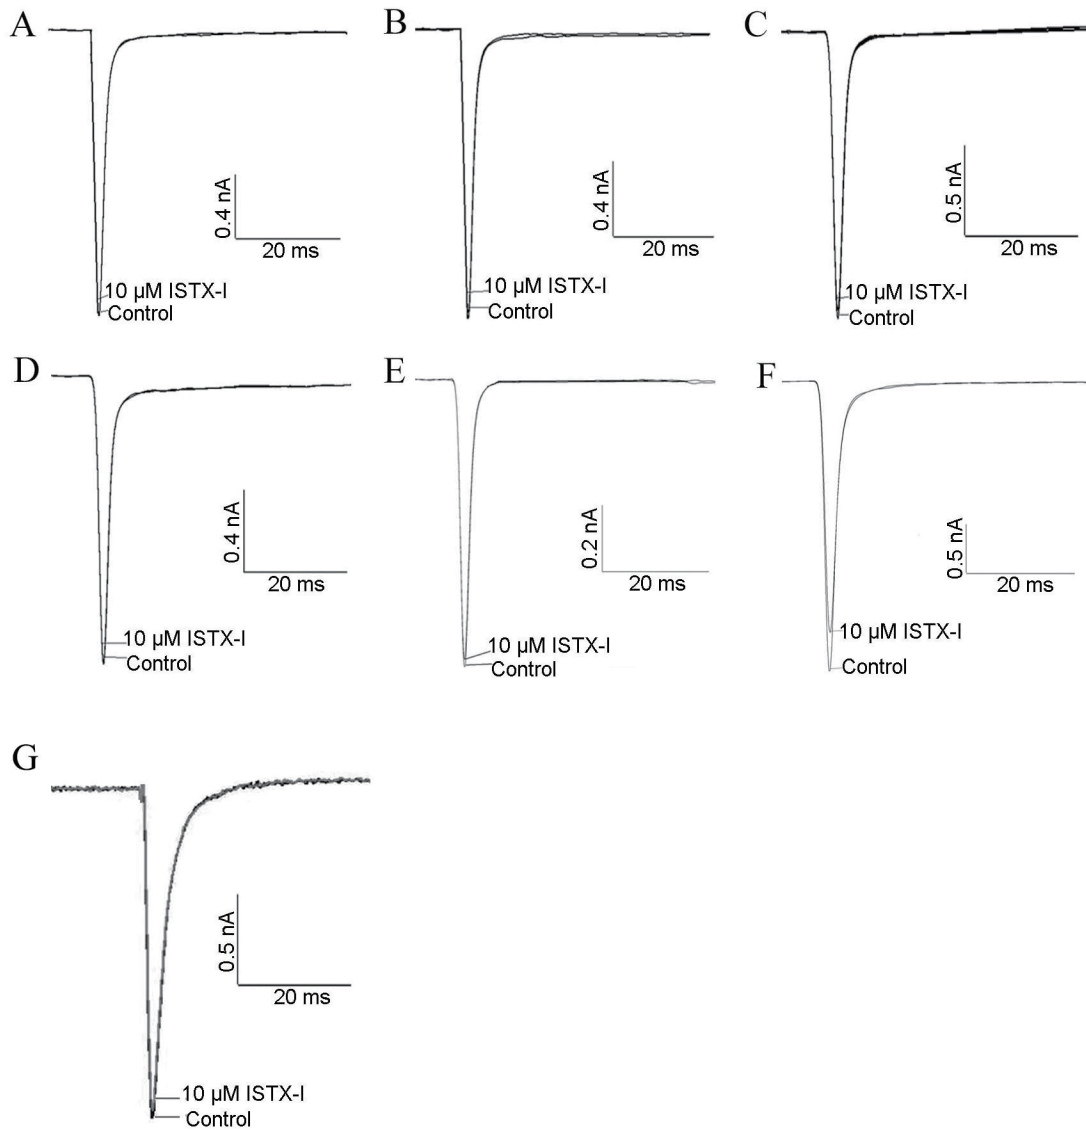

**A**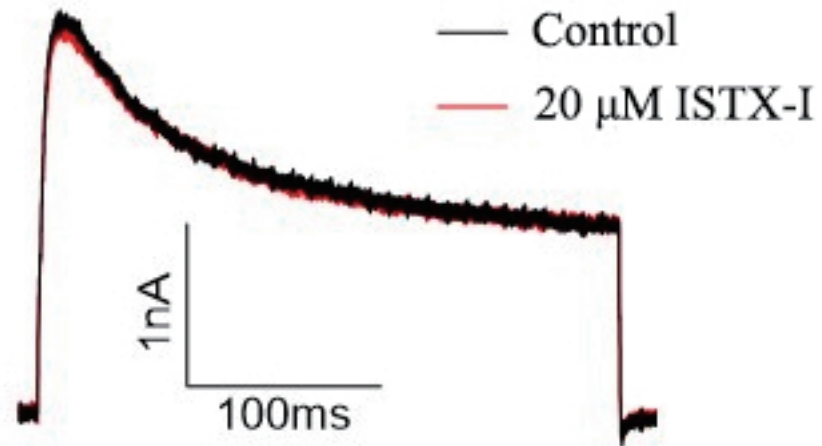**B**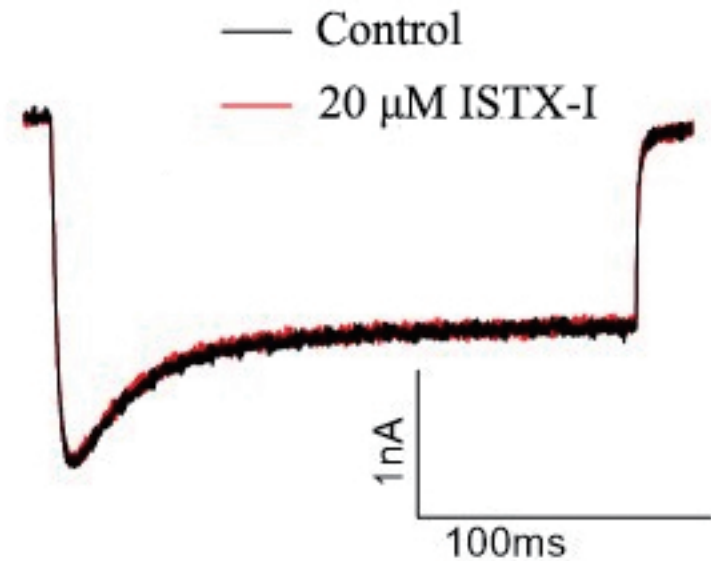

Supplementary table 1

| Name of toxin                 | Sequence                                                              |
|-------------------------------|-----------------------------------------------------------------------|
| mu-theraphotoxin-Hhn1b        | ECLGFGKGCNPSNDQCCKSSNLVCSRKHWRWCKYEI                                  |
| mu-theraphotoxin-Hhn1c        | ECLGFGKGCNPSNDQCCKSSNLVCSRKHRRCKYEIGK                                 |
| mu-theraphotoxin-Hhn1a        | ECLGFGKGCNPSNDQCCKSANLVCSRKHWRWCKYEI                                  |
| mu-theraphotoxin-Hs2a         | ACNPSNDQCCKSSKLVCSRKTRWCKYQIGK                                        |
| beta-theraphotoxin-Cm1a       | DCLGWFKSCDPKNDKCKKNYTCRRDRWCKYDL                                      |
| beta-theraphotoxin-Cm1b       | DCLGWFKSCDPKNDKCKKNYTCRRDRWCKYYL                                      |
| beta-theraphotoxin-Ps1a       | DCLGFLWKCNPNDKCCRPNLVCSRKDKWCKYQI                                     |
| omega-theraphotoxin-Gr2a      | DCLGFMKCPDNDKCCRPNLVCSRTHKWCKYVF                                      |
| beta-theraphotoxin-Cg2a       | YCQKWMWTCDSEKACCEGLRCKLWCRKIIG                                        |
| beta-theraphotoxin-Tp2a       | YCQKWMWTCDSEKCCCEGMVCRLWCKKLLW                                        |
| beta-theraphotoxin-Gr1a       | YCQKWMWTCDSEKRCCEDMVCQLWCKKRL                                         |
| beta-theraphotoxin-Gr1c       | YCQKWMWTCDSEKRCCEDMVCQLWCKKRLG                                        |
| beta-theraphotoxin-Gr1d       | YCQKWLWTCDSEKCCCEDMVCRLWCKKRLG                                        |
| beta-theraphotoxin-Gr1b       | YCQKWLWTCDSEKCCCEDMVCRLWCKKRL                                         |
| beta-hexatoxin-Mr1a           | GCKLTFWKCKNKKECCGWNACALGICMPR                                         |
| beta/kappa-theraphotoxin-Cg1a | ECGGFWWKCGRGKPPCKGYACSKTWGWC AVEAP                                    |
| mu-theraphotoxin-Hhn2b        | ECKGFGKSCVPGKNECCSGYACNSRDKWCKVLL                                     |
| mu-theraphotoxin-Hhn2a        | GCKGFGDSCTPGKNECCPNYACSSKHKWCKVYL                                     |
| mu-theraphotoxin-Hhn2h        | GCKGFGDSCTPGKNECCPNYACSSKHKWCKVYSGK                                   |
| mu-theraphotoxin-Hhn2o        | GCKGFGDSCTPGKNECCPNHACSNKHKWCKAYLGK                                   |
| mu(omega)-theraphotoxin-Hs1c  | ACKGVFDCTPGKNECCSNRVCSDKHKWCKWKL                                      |
| mu(omega)-theraphotoxin-Hs1b  | ACKGVFGACTPGKNECCPNRVCSDKHKWCKWKL                                     |
| mu(omega)-theraphotoxin-Hs1d  | ACKGVFDCTPGKNECCPNRVCSDKHKWCKWKL                                      |
| mu(omega)-theraphotoxin-Hs1a  | ACKGVFDCTPGKNECCPNRVCSDKHKWCKWKL                                      |
| beta/omega-theraphotoxin-Tp1a | ECRYWLGGSAGQTCCKHLVCSRHRGWCVWDGTF                                     |
| mu-theraphotoxin-Cg1a         | ACREWLGGCSKDADCAHLECRKKWPYHCVWDWTVRK                                  |
| mu-theraphotoxin-Cg2a         | ECTKFLGGCSEDECCPHLGCKDVLYYCAWDGTFGK                                   |
| beta-theraphotoxin-Cm2a       | GVDKEGCRKLLGGCTIDDDCCPHLGCNKKYWHCGWDGTF                               |
| beta-theraphotoxin-Cg1a       | ECRKMFGGCSVSDCAHLGCKPTLYCAWDGTFGK                                     |
| ISTX-I                        | LCSNGDCAAECCVDTVFEEDMVTRSCETTGNFTECPGLTPIA                            |
| Alpha-toxin Ac1               | DGYIVYPNNVCYHCPACDGLCKKNGGTS GSCSFLIGSGIACWCKDLP<br>DNVPIKDPSQKCT     |
| alpha-toxin Acra4             | VRDGYIVDDKNCVYHCIPPCDGLCKKNGGKSGSCSFLVPSGLACWCK<br>ALPDNVPIKDPSYKCHK  |
| BmKBT                         | KKSGYPTDHEGCKNWCVLNHSCGILCEGYGGSGYCYFWKLACWCD<br>DIHNWVPTWSRATNKCRK   |
| Toxin CsEv2                   | EGYLVNKSTGCKYGCLKLGNEGCDKECKAKNQGGSYGYCYAFAC<br>WCEGLPESTPTYPLPNKSCS  |
| Beta-toxin Cn5                | EGYLVNKSTGCKYGCLLLGKNEGCDKECKAKNQGGSYGYCYAFGC<br>WCEGLPESTPTYPLPNKSCS |
| Neurotoxin Cex1               | EGCDKECKAPNQGGGYGYCHAFACWCENLPESTPTYPIPGKSC                           |



|                         |                                                                          |
|-------------------------|--------------------------------------------------------------------------|
| Beta-toxin BmKAs1       | DNGYLLNKYTGCKIWCVINNESCNSECKLRRGNYGYCYFWKLACYC<br>EGAPKSELWAYETNKCNGKM   |
| Toxin Cn1               | DGYLVDAKGCKKNCYKLGKNDYCNRECRMKHRGGSYGYCYGFGC<br>YCEGLSDSTPTWPLPNKTCSGK   |
| Toxin Acra1             | ADVPGNYPLDSSGNKYPCTVLGDNQSCIDVCKKHGVKYGYCYSFKC<br>WCEFLEDKNVSI           |
| Beta-toxin Cn4          | EGYLVNSYTGCKYECLKLDNDYCLRECKQQYGKGAGGYCYAFGC<br>WCTHLYEQAVVWPLKNKTCNGK   |
| Beta-mammal toxin Css2  | KEGYLVSKSTGCKYECLKLDNDYCLRECKQQYGKSSGGYCYAFAC<br>WCTHLYEQAVVWPLPNKTCN    |
| Toxin CngtIII           | KEGYLVNKSTGCKYGFVLGKNEGCDKECKAKNQGGSYGYCYAFG<br>CWCEGLPESTPTYPLPNKTCSSK  |
| BmKa1                   | DGYIADDKNCYPFCGRNAYCDDECKKNGAESGYCQWAGVYGNAC<br>WCYKLPDKVPIRVPKCGNGG     |
| Lqh4                    | GVRDAYIADDKNCVYTCGANSYCNTECTKNGAESGYCQWFGKYGN<br>ACWCIKLPDKVPIRIPGKCR    |
| Alpha-mammal toxin Bot3 | VKDGYIVDDRNTYFCGRNAYCNEECTKLKGESGYCQWASPYGNAC<br>YCYKVPDHRVTKGPGRCN      |
| Toxin Tst1              | GKEGYLMDHEGCKLSCFIRPSGYCGRECTLKKGSSGYCAWPACYCY<br>GLPNWVKVWDRATNKC       |
| Toxin To1               | KKEGYLVGNDGCKYGCITRPHQYCVHECELKKGTDGYCAYWLACY<br>CYNMPDWVKTWSSATNCK      |
| Toxin To4               | DGYLMEYGGCKMSCLMKGTFCABEECTRMKGKDGICYAWLACYC<br>YNMPDWVKIWNRATNKCGKRK    |
| Tz1                     | DGYLVGNDGCKYSCFTRPGTYCANECRSRVKKGKDGICYAWMACYCY<br>SMPNWKVKTWDRATNRCGRGK |

|            |    |      |     |   |        |        |        |
|------------|----|------|-----|---|--------|--------|--------|
| NUMMDL     | 20 |      |     |   |        |        |        |
| MODEL      | 1  |      |     |   |        |        |        |
| ATOM       | 1  | N    | GLY | 1 | 27.471 | -3.636 | 16.180 |
| 1.00999.99 |    |      |     | N |        |        |        |
| ATOM       | 2  | CA   | GLY | 1 | 26.154 | -3.730 | 16.872 |
| 1.00999.99 |    |      |     | C |        |        |        |
| ATOM       | 3  | C    | GLY | 1 | 25.347 | -2.465 | 16.608 |
| 1.00999.99 |    |      |     | C |        |        |        |
| ATOM       | 4  | O    | GLY | 1 | 24.697 | -1.933 | 17.508 |
| 1.00999.99 |    |      |     | O |        |        |        |
| ATOM       | 5  | HA1  | GLY | 1 | 26.312 | -3.837 | 17.934 |
| 1.00999.99 |    |      |     | H |        |        |        |
| ATOM       | 6  | HA2  | GLY | 1 | 25.613 | -4.589 | 16.499 |
| 1.00999.99 |    |      |     | H |        |        |        |
| ATOM       | 7  | HT1  | GLY | 1 | 27.469 | -4.255 | 15.345 |
| 1.00999.99 |    |      |     | H |        |        |        |
| ATOM       | 8  | HT2  | GLY | 1 | 28.226 | -3.933 | 16.831 |
| 1.00999.99 |    |      |     | H |        |        |        |
| ATOM       | 9  | HT3  | GLY | 1 | 27.636 | -2.654 | 15.880 |
| 1.00999.99 |    |      |     | H |        |        |        |
| ATOM       | 10 | N    | LEU | 2 | 25.390 | -1.987 | 15.369 |
| 1.00999.99 |    |      |     | N |        |        |        |
| ATOM       | 11 | CA   | LEU | 2 | 24.655 | -0.783 | 14.999 |
| 1.00895.59 |    |      |     | C |        |        |        |
| ATOM       | 12 | C    | LEU | 2 | 23.160 | -1.077 | 14.935 |
| 1.00532.27 |    |      |     | C |        |        |        |
| ATOM       | 13 | O    | LEU | 2 | 22.750 | -2.166 | 14.532 |
| 1.00625.21 |    |      |     | O |        |        |        |
| ATOM       | 14 | CB   | LEU | 2 | 25.134 | -0.275 | 13.638 |
| 1.00999.99 |    |      |     | C |        |        |        |
| ATOM       | 15 | CG   | LEU | 2 | 26.641 | 0.005  | 13.682 |
| 1.00999.99 |    |      |     | C |        |        |        |
| ATOM       | 16 | CD1  | LEU | 2 | 27.111 | 0.435  | 12.289 |
| 1.00999.99 |    |      |     | C |        |        |        |
| ATOM       | 17 | CD2  | LEU | 2 | 26.943 | 1.123  | 14.698 |
| 1.00999.99 |    |      |     | C |        |        |        |
| ATOM       | 18 | HN   | LEU | 2 | 25.923 | -2.453 | 14.692 |
| 1.00999.99 |    |      |     | H |        |        |        |
| ATOM       | 19 | HA   | LEU | 2 | 24.829 | -0.020 | 15.742 |
| 1.00890.87 |    |      |     | H |        |        |        |
| ATOM       | 20 | HB1  | LEU | 2 | 24.609 | 0.636  | 13.391 |
| 1.00924.07 |    |      |     | H |        |        |        |
| ATOM       | 21 | HB2  | LEU | 2 | 24.931 | -1.023 | 12.885 |
| 1.00999.99 |    |      |     | H |        |        |        |
| ATOM       | 22 | HG   | LEU | 2 | 27.163 | -0.896 | 13.972 |
| 1.00999.99 |    |      |     | H |        |        |        |
| ATOM       | 23 | HD11 | LEU | 2 | 26.827 | -0.316 | 11.567 |
| 1.00999.99 |    |      |     | H |        |        |        |
| ATOM       | 24 | HD12 | LEU | 2 | 28.185 | 0.546  | 12.289 |
| 1.00999.99 |    |      |     | H |        |        |        |
| ATOM       | 25 | HD13 | LEU | 2 | 26.651 | 1.377  | 12.029 |
| 1.00999.99 |    |      |     | H |        |        |        |

|            |    |      |     |   |        |        |        |      |
|------------|----|------|-----|---|--------|--------|--------|------|
| ATOM       | 26 | HD21 | LEU | 2 | 26.145 | 1.852  | 14.688 |      |
| 1.00999.99 |    |      | H   |   |        |        |        |      |
| ATOM       | 27 | HD22 | LEU | 2 | 27.874 | 1.611  | 14.440 |      |
| 1.00999.99 |    |      | H   |   |        |        |        |      |
| ATOM       | 28 | HD23 | LEU | 2 | 27.029 | 0.697  | 15.686 |      |
| 1.00999.99 |    |      | H   |   |        |        |        |      |
| ATOM       | 29 | N    | CYS | 3 | 22.348 | -0.101 | 15.335 |      |
| 1.00271.28 |    |      | N   |   |        |        |        |      |
| ATOM       | 30 | CA   | CYS | 3 | 20.897 | -0.267 | 15.321 |      |
| 1.00104.50 |    |      | C   |   |        |        |        |      |
| ATOM       | 31 | C    | CYS | 3 | 20.312 | 0.145  | 13.974 | 1.00 |
| 90.98      |    |      | C   |   |        |        |        |      |
| ATOM       | 32 | O    | CYS | 3 | 20.387 | 1.308  | 13.578 |      |
| 1.00207.28 |    |      | O   |   |        |        |        |      |
| ATOM       | 33 | CB   | CYS | 3 | 20.264 | 0.571  | 16.433 | 1.00 |
| 37.83      |    |      | C   |   |        |        |        |      |
| ATOM       | 34 | SG   | CYS | 3 | 20.603 | -0.207 | 18.031 | 1.00 |
| 81.56      |    |      | S   |   |        |        |        |      |
| ATOM       | 35 | HN   | CYS | 3 | 22.732 | 0.744  | 15.648 |      |
| 1.00296.55 |    |      | H   |   |        |        |        |      |
| ATOM       | 36 | HA   | CYS | 3 | 20.659 | -1.301 | 15.498 |      |
| 1.00166.45 |    |      | H   |   |        |        |        |      |
| ATOM       | 37 | HB1  | CYS | 3 | 19.198 | 0.629  | 16.279 | 1.00 |
| 40.38      |    |      | H   |   |        |        |        |      |
| ATOM       | 38 | HB2  | CYS | 3 | 20.685 | 1.567  | 16.420 | 1.00 |
| 98.45      |    |      | H   |   |        |        |        |      |
| ATOM       | 39 | N    | SER | 4 | 19.720 | -0.824 | 13.280 | 1.00 |
| 85.31      |    |      | N   |   |        |        |        |      |
| ATOM       | 40 | CA   | SER | 4 | 19.110 | -0.563 | 11.983 | 1.00 |
| 92.94      |    |      | C   |   |        |        |        |      |
| ATOM       | 41 | C    | SER | 4 | 17.816 | 0.212  | 12.165 | 1.00 |
| 67.37      |    |      | C   |   |        |        |        |      |
| ATOM       | 42 | O    | SER | 4 | 17.702 | 1.373  | 11.770 |      |
| 1.00102.28 |    |      | O   |   |        |        |        |      |
| ATOM       | 43 | CB   | SER | 4 | 18.792 | -1.886 | 11.286 |      |
| 1.00123.83 |    |      | C   |   |        |        |        |      |
| ATOM       | 44 | OG   | SER | 4 | 18.477 | -1.635 | 9.923  |      |
| 1.00178.89 |    |      | O   |   |        |        |        |      |
| ATOM       | 45 | HN   | SER | 4 | 19.687 | -1.729 | 13.653 |      |
| 1.00163.03 |    |      | H   |   |        |        |        |      |
| ATOM       | 46 | HA   | SER | 4 | 19.791 | 0.008  | 11.370 |      |
| 1.00129.78 |    |      | H   |   |        |        |        |      |
| ATOM       | 47 | HB1  | SER | 4 | 17.945 | -2.355 | 11.781 |      |
| 1.00105.26 |    |      | H   |   |        |        |        |      |
| ATOM       | 48 | HB2  | SER | 4 | 19.646 | -2.540 | 11.340 |      |
| 1.00156.87 |    |      | H   |   |        |        |        |      |
| ATOM       | 49 | HG   | SER | 4 | 19.121 | -2.098 | 9.381  |      |
| 1.00218.16 |    |      | H   |   |        |        |        |      |
| ATOM       | 50 | N    | GLU | 5 | 16.846 | -0.457 | 12.773 | 1.00 |
| 41.67      |    |      | N   |   |        |        |        |      |
| ATOM       | 51 | CA   | GLU | 5 | 15.544 | 0.141  | 13.027 | 1.00 |
| 41.21      |    |      | C   |   |        |        |        |      |

|            |    |      |     |   |        |        |        |      |
|------------|----|------|-----|---|--------|--------|--------|------|
| ATOM       | 52 | C    | GLU | 5 | 15.583 | 0.993  | 14.289 | 1.00 |
| 41.92      |    |      | C   |   |        |        |        |      |
| ATOM       | 53 | O    | GLU | 5 | 16.451 | 0.814  | 15.144 | 1.00 |
| 74.72      |    |      | O   |   |        |        |        |      |
| ATOM       | 54 | CB   | GLU | 5 | 14.488 | -0.952 | 13.168 | 1.00 |
| 49.24      |    |      | C   |   |        |        |        |      |
| ATOM       | 55 | CG   | GLU | 5 | 14.952 | -1.961 | 14.207 | 1.00 |
| 55.48      |    |      | C   |   |        |        |        |      |
| ATOM       | 56 | CD   | GLU | 5 | 13.930 | -3.084 | 14.342 | 1.00 |
| 92.06      |    |      | C   |   |        |        |        |      |
| ATOM       | 57 | OE1  | GLU | 5 | 14.172 | -3.988 | 15.125 |      |
| 1.00206.49 |    |      | O   |   |        |        |        |      |
| ATOM       | 58 | OE2  | GLU | 5 | 12.918 | -3.024 | 13.661 |      |
| 1.00197.24 |    |      | O1- |   |        |        |        |      |
| ATOM       | 59 | HN   | GLU | 5 | 17.012 | -1.376 | 13.058 | 1.00 |
| 45.52      |    |      | H   |   |        |        |        |      |
| ATOM       | 60 | HA   | GLU | 5 | 15.281 | 0.760  | 12.193 | 1.00 |
| 60.63      |    |      | H   |   |        |        |        |      |
| ATOM       | 61 | HB1  | GLU | 5 | 14.351 | -1.449 | 12.220 | 1.00 |
| 61.59      |    |      | H   |   |        |        |        |      |
| ATOM       | 62 | HB2  | GLU | 5 | 13.558 | -0.513 | 13.482 | 1.00 |
| 63.66      |    |      | H   |   |        |        |        |      |
| ATOM       | 63 | HG1  | GLU | 5 | 15.074 | -1.470 | 15.158 | 1.00 |
| 58.03      |    |      | H   |   |        |        |        |      |
| ATOM       | 64 | HG2  | GLU | 5 | 15.894 | -2.369 | 13.892 | 1.00 |
| 57.77      |    |      | H   |   |        |        |        |      |
| ATOM       | 65 | N    | ASN | 6 | 14.644 | 1.926  | 14.397 | 1.00 |
| 50.73      |    |      | N   |   |        |        |        |      |
| ATOM       | 66 | CA   | ASN | 6 | 14.585 | 2.806  | 15.558 | 1.00 |
| 71.04      |    |      | C   |   |        |        |        |      |
| ATOM       | 67 | C    | ASN | 6 | 14.379 | 2.004  | 16.841 | 1.00 |
| 65.17      |    |      | C   |   |        |        |        |      |
| ATOM       | 68 | O    | ASN | 6 | 15.006 | 2.281  | 17.862 | 1.00 |
| 94.86      |    |      | O   |   |        |        |        |      |
| ATOM       | 69 | CB   | ASN | 6 | 13.444 | 3.810  | 15.395 | 1.00 |
| 94.83      |    |      | C   |   |        |        |        |      |
| ATOM       | 70 | CG   | ASN | 6 | 13.434 | 4.784  | 16.567 |      |
| 1.00160.94 |    |      | C   |   |        |        |        |      |
| ATOM       | 71 | ND2  | ASN | 6 | 12.371 | 4.874  | 17.319 |      |
| 1.00244.88 |    |      | N   |   |        |        |        |      |
| ATOM       | 72 | OD1  | ASN | 6 | 14.419 | 5.483  | 16.804 |      |
| 1.00219.73 |    |      | O   |   |        |        |        |      |
| ATOM       | 73 | HN   | ASN | 6 | 13.981 | 2.027  | 13.682 | 1.00 |
| 72.81      |    |      | H   |   |        |        |        |      |
| ATOM       | 74 | HA   | ASN | 6 | 15.516 | 3.348  | 15.632 | 1.00 |
| 96.02      |    |      | H   |   |        |        |        |      |
| ATOM       | 75 | HB1  | ASN | 6 | 12.503 | 3.281  | 15.362 |      |
| 1.00111.09 |    |      | H   |   |        |        |        |      |
| ATOM       | 76 | HB2  | ASN | 6 | 13.579 | 4.358  | 14.473 | 1.00 |
| 98.13      |    |      | H   |   |        |        |        |      |
| ATOM       | 77 | HD21 | ASN | 6 | 11.587 | 4.317  | 17.130 |      |
| 1.00272.43 |    |      | H   |   |        |        |        |      |

|            |     |      |     |   |        |        |        |      |
|------------|-----|------|-----|---|--------|--------|--------|------|
| ATOM       | 78  | HD22 | ASN | 6 | 12.357 | 5.499  | 18.075 |      |
| 1.00336.78 |     |      |     |   |        |        |        | H    |
| ATOM       | 79  | N    | GLY | 7 | 13.489 | 1.015  | 16.786 | 1.00 |
| 51.80      |     |      | N   |   |        |        |        |      |
| ATOM       | 80  | CA   | GLY | 7 | 13.199 | 0.184  | 17.957 | 1.00 |
| 71.47      |     |      | C   |   |        |        |        |      |
| ATOM       | 81  | C    | GLY | 7 | 14.008 | -1.106 | 17.939 | 1.00 |
| 41.04      |     |      | C   |   |        |        |        |      |
| ATOM       | 82  | O    | GLY | 7 | 13.453 | -2.199 | 18.048 | 1.00 |
| 44.54      |     |      | O   |   |        |        |        |      |
| ATOM       | 83  | HN   | GLY | 7 | 13.014 | 0.843  | 15.946 | 1.00 |
| 45.49      |     |      | H   |   |        |        |        |      |
| ATOM       | 84  | HA1  | GLY | 7 | 12.154 | -0.064 | 17.958 |      |
| 1.00103.52 |     |      |     |   |        |        |        | H    |
| ATOM       | 85  | HA2  | GLY | 7 | 13.432 | 0.734  | 18.858 |      |
| 1.00108.67 |     |      |     |   |        |        |        | H    |
| ATOM       | 86  | N    | ASP | 8 | 15.318 | -0.971 | 17.806 | 1.00 |
| 27.00      |     |      | N   |   |        |        |        |      |
| ATOM       | 87  | CA   | ASP | 8 | 16.196 | -2.137 | 17.781 | 1.00 |
| 14.15      |     |      | C   |   |        |        |        |      |
| ATOM       | 88  | C    | ASP | 8 | 16.121 | -2.896 | 19.100 | 1.00 |
| 9.37       |     |      | C   |   |        |        |        |      |
| ATOM       | 89  | O    | ASP | 8 | 15.998 | -4.120 | 19.117 | 1.00 |
| 14.61      |     |      | O   |   |        |        |        |      |
| ATOM       | 90  | CB   | ASP | 8 | 17.640 | -1.706 | 17.523 | 1.00 |
| 15.06      |     |      | C   |   |        |        |        |      |
| ATOM       | 91  | CG   | ASP | 8 | 18.535 | -2.935 | 17.399 | 1.00 |
| 21.22      |     |      | C   |   |        |        |        |      |
| ATOM       | 92  | OD1  | ASP | 8 | 18.044 | -4.027 | 17.630 |      |
| 1.00119.56 |     |      |     |   |        |        |        | O    |
| ATOM       | 93  | OD2  | ASP | 8 | 19.698 | -2.765 | 17.075 |      |
| 1.00133.27 |     |      |     |   |        |        |        | O1-  |
| ATOM       | 94  | HN   | ASP | 8 | 15.700 | -0.074 | 17.728 | 1.00 |
| 35.63      |     |      | H   |   |        |        |        |      |
| ATOM       | 95  | HA   | ASP | 8 | 15.881 | -2.791 | 16.987 | 1.00 |
| 20.92      |     |      | H   |   |        |        |        |      |
| ATOM       | 96  | HB1  | ASP | 8 | 17.983 | -1.097 | 18.345 | 1.00 |
| 29.39      |     |      | H   |   |        |        |        |      |
| ATOM       | 97  | HB2  | ASP | 8 | 17.685 | -1.134 | 16.608 | 1.00 |
| 44.14      |     |      | H   |   |        |        |        |      |
| ATOM       | 98  | N    | CYS | 9 | 16.197 | -2.160 | 20.201 | 1.00 |
| 5.93       |     |      | N   |   |        |        |        |      |
| ATOM       | 99  | CA   | CYS | 9 | 16.137 | -2.774 | 21.522 | 1.00 |
| 7.54       |     |      | C   |   |        |        |        |      |
| ATOM       | 100 | C    | CYS | 9 | 14.787 | -3.448 | 21.726 | 1.00 |
| 14.60      |     |      | C   |   |        |        |        |      |
| ATOM       | 101 | O    | CYS | 9 | 14.699 | -4.555 | 22.256 | 1.00 |
| 25.78      |     |      | O   |   |        |        |        |      |
| ATOM       | 102 | CB   | CYS | 9 | 16.348 | -1.719 | 22.600 | 1.00 |
| 6.63       |     |      | C   |   |        |        |        |      |
| ATOM       | 103 | SG   | CYS | 9 | 18.047 | -1.147 | 22.526 | 1.00 |
| 10.91      |     |      | S   |   |        |        |        |      |

|            |     |     |     |    |        |        |        |      |
|------------|-----|-----|-----|----|--------|--------|--------|------|
| ATOM       | 104 | HN  | CYS | 9  | 16.295 | -1.190 | 20.121 | 1.00 |
| 6.51       |     | H   |     |    |        |        |        |      |
| ATOM       | 105 | HA  | CYS | 9  | 16.923 | -3.506 | 21.604 | 1.00 |
| 11.12      |     | H   |     |    |        |        |        |      |
| ATOM       | 106 | HB1 | CYS | 9  | 16.157 | -2.147 | 23.572 | 1.00 |
| 11.28      |     | H   |     |    |        |        |        |      |
| ATOM       | 107 | HB2 | CYS | 9  | 15.686 | -0.883 | 22.436 | 1.00 |
| 5.04       |     | H   |     |    |        |        |        |      |
| ATOM       | 108 | N   | ALA | 10 | 13.738 | -2.760 | 21.290 | 1.00 |
| 16.26      |     | N   |     |    |        |        |        |      |
| ATOM       | 109 | CA  | ALA | 10 | 12.379 | -3.272 | 21.408 | 1.00 |
| 32.04      |     | C   |     |    |        |        |        |      |
| ATOM       | 110 | C   | ALA | 10 | 11.418 | -2.380 | 20.626 | 1.00 |
| 45.47      |     | C   |     |    |        |        |        |      |
| ATOM       | 111 | O   | ALA | 10 | 11.789 | -1.289 | 20.191 |      |
| 1.00119.04 |     | O   |     |    |        |        |        |      |
| ATOM       | 112 | CB  | ALA | 10 | 11.960 | -3.328 | 22.881 | 1.00 |
| 30.10      |     | C   |     |    |        |        |        |      |
| ATOM       | 113 | HN  | ALA | 10 | 13.885 | -1.885 | 20.874 | 1.00 |
| 12.81      |     | H   |     |    |        |        |        |      |
| ATOM       | 114 | HA  | ALA | 10 | 12.345 | -4.270 | 20.996 | 1.00 |
| 47.14      |     | H   |     |    |        |        |        |      |
| ATOM       | 115 | HB1 | ALA | 10 | 11.143 | -4.025 | 22.996 | 1.00 |
| 84.37      |     | H   |     |    |        |        |        |      |
| ATOM       | 116 | HB2 | ALA | 10 | 11.647 | -2.349 | 23.207 |      |
| 1.00118.20 |     | H   |     |    |        |        |        |      |
| ATOM       | 117 | HB3 | ALA | 10 | 12.798 | -3.656 | 23.480 |      |
| 1.00117.32 |     | H   |     |    |        |        |        |      |
| ATOM       | 118 | N   | ALA | 11 | 10.189 | -2.847 | 20.445 | 1.00 |
| 30.62      |     | N   |     |    |        |        |        |      |
| ATOM       | 119 | CA  | ALA | 11 | 9.196  | -2.074 | 19.708 | 1.00 |
| 35.24      |     | C   |     |    |        |        |        |      |
| ATOM       | 120 | C   | ALA | 11 | 8.927  | -0.736 | 20.394 | 1.00 |
| 22.78      |     | C   |     |    |        |        |        |      |
| ATOM       | 121 | O   | ALA | 11 | 8.811  | 0.297  | 19.733 | 1.00 |
| 53.33      |     | O   |     |    |        |        |        |      |
| ATOM       | 122 | CB  | ALA | 11 | 7.891  | -2.866 | 19.604 | 1.00 |
| 60.49      |     | C   |     |    |        |        |        |      |
| ATOM       | 123 | HN  | ALA | 11 | 9.946  | -3.723 | 20.810 | 1.00 |
| 50.37      |     | H   |     |    |        |        |        |      |
| ATOM       | 124 | HA  | ALA | 11 | 9.567  | -1.887 | 18.711 | 1.00 |
| 41.70      |     | H   |     |    |        |        |        |      |
| ATOM       | 125 | HB1 | ALA | 11 | 7.589  | -3.190 | 20.589 |      |
| 1.00157.06 |     | H   |     |    |        |        |        |      |
| ATOM       | 126 | HB2 | ALA | 11 | 8.041  | -3.727 | 18.971 |      |
| 1.00148.83 |     | H   |     |    |        |        |        |      |
| ATOM       | 127 | HB3 | ALA | 11 | 7.122  | -2.237 | 19.181 |      |
| 1.00137.06 |     | H   |     |    |        |        |        |      |
| ATOM       | 128 | N   | ASP | 12 | 8.828  | -0.760 | 21.720 | 1.00 |
| 18.98      |     | N   |     |    |        |        |        |      |
| ATOM       | 129 | CA  | ASP | 12 | 8.568  | 0.460  | 22.484 | 1.00 |
| 31.05      |     | C   |     |    |        |        |        |      |

|            |     |     |     |    |        |        |        |      |
|------------|-----|-----|-----|----|--------|--------|--------|------|
| ATOM       | 130 | C   | ASP | 12 | 9.859  | 1.238  | 22.730 | 1.00 |
| 22.98      |     |     | C   |    |        |        |        |      |
| ATOM       | 131 | O   | ASP | 12 | 9.850  | 2.467  | 22.804 | 1.00 |
| 37.14      |     |     | O   |    |        |        |        |      |
| ATOM       | 132 | CB  | ASP | 12 | 7.925  | 0.107  | 23.825 | 1.00 |
| 48.35      |     |     | C   |    |        |        |        |      |
| ATOM       | 133 | CG  | ASP | 12 | 6.511  | -0.422 | 23.602 |      |
| 1.00104.83 |     |     | C   |    |        |        |        |      |
| ATOM       | 134 | OD1 | ASP | 12 | 5.965  | -1.001 | 24.527 |      |
| 1.00258.73 |     |     | O   |    |        |        |        |      |
| ATOM       | 135 | OD2 | ASP | 12 | 5.997  | -0.240 | 22.512 |      |
| 1.00213.46 |     |     | O1- |    |        |        |        |      |
| ATOM       | 136 | HN  | ASP | 12 | 8.927  | -1.612 | 22.195 | 1.00 |
| 36.19      |     |     | H   |    |        |        |        |      |
| ATOM       | 137 | HA  | ASP | 12 | 7.885  | 1.085  | 21.928 | 1.00 |
| 49.76      |     |     | H   |    |        |        |        |      |
| ATOM       | 138 | HB1 | ASP | 12 | 7.883  | 0.989  | 24.447 | 1.00 |
| 95.71      |     |     | H   |    |        |        |        |      |
| ATOM       | 139 | HB2 | ASP | 12 | 8.517  | -0.651 | 24.317 | 1.00 |
| 54.37      |     |     | H   |    |        |        |        |      |
| ATOM       | 140 | N   | GLU | 13 | 10.965 | 0.514  | 22.863 | 1.00 |
| 17.60      |     |     | N   |    |        |        |        |      |
| ATOM       | 141 | CA  | GLU | 13 | 12.260 | 1.145  | 23.109 | 1.00 |
| 12.01      |     |     | C   |    |        |        |        |      |
| ATOM       | 142 | C   | GLU | 13 | 12.801 | 1.793  | 21.838 | 1.00 |
| 10.07      |     |     | C   |    |        |        |        |      |
| ATOM       | 143 | O   | GLU | 13 | 12.294 | 1.552  | 20.742 | 1.00 |
| 12.81      |     |     | O   |    |        |        |        |      |
| ATOM       | 144 | CB  | GLU | 13 | 13.253 | 0.102  | 23.624 | 1.00 |
| 11.74      |     |     | C   |    |        |        |        |      |
| ATOM       | 145 | CG  | GLU | 13 | 12.786 | -0.412 | 24.987 | 1.00 |
| 13.49      |     |     | C   |    |        |        |        |      |
| ATOM       | 146 | CD  | GLU | 13 | 13.681 | -1.556 | 25.450 |      |
| 1.00142.36 |     |     | C   |    |        |        |        |      |
| ATOM       | 147 | OE1 | GLU | 13 | 14.889 | -1.395 | 25.396 |      |
| 1.00339.06 |     |     | O   |    |        |        |        |      |
| ATOM       | 148 | OE2 | GLU | 13 | 13.146 | -2.576 | 25.851 |      |
| 1.00335.28 |     |     | O1- |    |        |        |        |      |
| ATOM       | 149 | HN  | GLU | 13 | 10.910 | -0.462 | 22.800 | 1.00 |
| 28.36      |     |     | H   |    |        |        |        |      |
| ATOM       | 150 | HA  | GLU | 13 | 12.138 | 1.907  | 23.863 | 1.00 |
| 13.06      |     |     | H   |    |        |        |        |      |
| ATOM       | 151 | HB1 | GLU | 13 | 14.228 | 0.554  | 23.726 | 1.00 |
| 13.76      |     |     | H   |    |        |        |        |      |
| ATOM       | 152 | HB2 | GLU | 13 | 13.307 | -0.720 | 22.924 | 1.00 |
| 9.94       |     |     | H   |    |        |        |        |      |
| ATOM       | 153 | HG1 | GLU | 13 | 11.769 | -0.763 | 24.910 | 1.00 |
| 66.02      |     |     | H   |    |        |        |        |      |
| ATOM       | 154 | HG2 | GLU | 13 | 12.834 | 0.392  | 25.707 | 1.00 |
| 56.23      |     |     | H   |    |        |        |        |      |
| ATOM       | 155 | N   | CYS | 14 | 13.833 | 2.622  | 21.998 | 1.00 |
| 9.12       |     |     | N   |    |        |        |        |      |

|            |     |     |     |    |        |       |        |      |
|------------|-----|-----|-----|----|--------|-------|--------|------|
| ATOM       | 156 | CA  | CYS | 14 | 14.451 | 3.320 | 20.865 | 1.00 |
| 10.69      |     |     | C   |    |        |       |        |      |
| ATOM       | 157 | C   | CYS | 14 | 15.967 | 3.159 | 20.897 | 1.00 |
| 9.56       |     |     | C   |    |        |       |        |      |
| ATOM       | 158 | O   | CYS | 14 | 16.577 | 3.148 | 21.965 | 1.00 |
| 13.62      |     |     | O   |    |        |       |        |      |
| ATOM       | 159 | CB  | CYS | 14 | 14.103 | 4.807 | 20.910 | 1.00 |
| 13.96      |     |     | C   |    |        |       |        |      |
| ATOM       | 160 | SG  | CYS | 14 | 14.971 | 5.664 | 19.572 | 1.00 |
| 42.96      |     |     | S   |    |        |       |        |      |
| ATOM       | 161 | HN  | CYS | 14 | 14.187 | 2.774 | 22.900 | 1.00 |
| 9.76       |     |     | H   |    |        |       |        |      |
| ATOM       | 162 | HA  | CYS | 14 | 14.078 | 2.905 | 19.938 | 1.00 |
| 15.54      |     |     | H   |    |        |       |        |      |
| ATOM       | 163 | HB1 | CYS | 14 | 14.406 | 5.218 | 21.861 | 1.00 |
| 50.72      |     |     | H   |    |        |       |        |      |
| ATOM       | 164 | HB2 | CYS | 14 | 13.036 | 4.932 | 20.788 | 1.00 |
| 46.13      |     |     | H   |    |        |       |        |      |
| ATOM       | 165 | N   | CYS | 15 | 16.567 | 3.042 | 19.713 | 1.00 |
| 9.60       |     |     | N   |    |        |       |        |      |
| ATOM       | 166 | CA  | CYS | 15 | 18.015 | 2.887 | 19.591 | 1.00 |
| 9.28       |     |     | C   |    |        |       |        |      |
| ATOM       | 167 | C   | CYS | 15 | 18.525 | 3.792 | 18.484 | 1.00 |
| 9.92       |     |     | C   |    |        |       |        |      |
| ATOM       | 168 | O   | CYS | 15 | 17.900 | 3.902 | 17.429 | 1.00 |
| 13.31      |     |     | O   |    |        |       |        |      |
| ATOM       | 169 | CB  | CYS | 15 | 18.369 | 1.442 | 19.244 | 1.00 |
| 12.90      |     |     | C   |    |        |       |        |      |
| ATOM       | 170 | SG  | CYS | 15 | 20.159 | 1.219 | 19.390 | 1.00 |
| 39.11      |     |     | S   |    |        |       |        |      |
| ATOM       | 171 | HN  | CYS | 15 | 16.025 | 3.069 | 18.899 | 1.00 |
| 13.12      |     |     | H   |    |        |       |        |      |
| ATOM       | 172 | HA  | CYS | 15 | 18.496 | 3.156 | 20.523 | 1.00 |
| 8.26       |     |     | H   |    |        |       |        |      |
| ATOM       | 173 | HB1 | CYS | 15 | 18.062 | 1.233 | 18.231 | 1.00 |
| 24.82      |     |     | H   |    |        |       |        |      |
| ATOM       | 174 | HB2 | CYS | 15 | 17.862 | 0.770 | 19.917 | 1.00 |
| 27.31      |     |     | H   |    |        |       |        |      |
| ATOM       | 175 | N   | VAL | 16 | 19.659 | 4.441 | 18.716 | 1.00 |
| 9.56       |     |     | N   |    |        |       |        |      |
| ATOM       | 176 | CA  | VAL | 16 | 20.222 | 5.331 | 17.710 | 1.00 |
| 11.99      |     |     | C   |    |        |       |        |      |
| ATOM       | 177 | C   | VAL | 16 | 21.742 | 5.334 | 17.795 | 1.00 |
| 7.73       |     |     | C   |    |        |       |        |      |
| ATOM       | 178 | O   | VAL | 16 | 22.319 | 5.701 | 18.818 | 1.00 |
| 8.83       |     |     | O   |    |        |       |        |      |
| ATOM       | 179 | CB  | VAL | 16 | 19.668 | 6.746 | 17.912 | 1.00 |
| 18.37      |     |     | C   |    |        |       |        |      |
| ATOM       | 180 | CG1 | VAL | 16 | 20.279 | 7.385 | 19.167 | 1.00 |
| 39.61      |     |     | C   |    |        |       |        |      |
| ATOM       | 181 | CG2 | VAL | 16 | 19.991 | 7.596 | 16.683 |      |
| 1.00115.21 |     |     | C   |    |        |       |        |      |



|            |     |      |     |    |        |       |        |      |
|------------|-----|------|-----|----|--------|-------|--------|------|
| ATOM       | 182 | HN   | VAL | 16 | 20.125 | 4.320 | 19.573 | 1.00 |
| 9.76       |     | H    |     |    |        |       |        |      |
| ATOM       | 183 | HA   | VAL | 16 | 19.935 | 4.985 | 16.725 | 1.00 |
| 17.27      |     | H    |     |    |        |       |        |      |
| ATOM       | 184 | HB   | VAL | 16 | 18.596 | 6.689 | 18.032 | 1.00 |
| 52.63      |     | H    |     |    |        |       |        |      |
| ATOM       | 185 | HG11 | VAL | 16 | 21.258 | 7.781 | 18.937 |      |
| 1.00128.07 |     | H    |     |    |        |       |        |      |
| ATOM       | 186 | HG12 | VAL | 16 | 20.363 | 6.642 | 19.946 |      |
| 1.00154.13 |     | H    |     |    |        |       |        |      |
| ATOM       | 187 | HG13 | VAL | 16 | 19.639 | 8.187 | 19.507 |      |
| 1.00135.74 |     | H    |     |    |        |       |        |      |
| ATOM       | 188 | HG21 | VAL | 16 | 19.352 | 7.295 | 15.866 |      |
| 1.00229.05 |     | H    |     |    |        |       |        |      |
| ATOM       | 189 | HG22 | VAL | 16 | 21.025 | 7.451 | 16.406 |      |
| 1.00261.82 |     | H    |     |    |        |       |        |      |
| ATOM       | 190 | HG23 | VAL | 16 | 19.820 | 8.637 | 16.910 |      |
| 1.00210.07 |     | H    |     |    |        |       |        |      |
| ATOM       | 191 | N    | ASP | 17 | 22.386 | 4.904 | 16.716 | 1.00 |
| 14.34      |     | N    |     |    |        |       |        |      |
| ATOM       | 192 | CA   | ASP | 17 | 23.840 | 4.847 | 16.684 | 1.00 |
| 11.90      |     | C    |     |    |        |       |        |      |
| ATOM       | 193 | C    | ASP | 17 | 24.440 | 6.238 | 16.513 | 1.00 |
| 13.15      |     | C    |     |    |        |       |        |      |
| ATOM       | 194 | O    | ASP | 17 | 24.215 | 6.903 | 15.501 | 1.00 |
| 25.96      |     | O    |     |    |        |       |        |      |
| ATOM       | 195 | CB   | ASP | 17 | 24.303 | 3.961 | 15.529 | 1.00 |
| 20.80      |     | C    |     |    |        |       |        |      |
| ATOM       | 196 | CG   | ASP | 17 | 23.727 | 2.560 | 15.676 | 1.00 |
| 28.72      |     | C    |     |    |        |       |        |      |
| ATOM       | 197 | OD1  | ASP | 17 | 23.227 | 2.043 | 14.692 |      |
| 1.00135.42 |     | O    |     |    |        |       |        |      |
| ATOM       | 198 | OD2  | ASP | 17 | 23.794 | 2.024 | 16.771 |      |
| 1.00114.17 |     | O1-  |     |    |        |       |        |      |
| ATOM       | 199 | HN   | ASP | 17 | 21.873 | 4.606 | 15.933 | 1.00 |
| 28.29      |     | H    |     |    |        |       |        |      |
| ATOM       | 200 | HA   | ASP | 17 | 24.194 | 4.425 | 17.612 | 1.00 |
| 10.49      |     | H    |     |    |        |       |        |      |
| ATOM       | 201 | HB1  | ASP | 17 | 25.382 | 3.906 | 15.532 | 1.00 |
| 22.42      |     | H    |     |    |        |       |        |      |
| ATOM       | 202 | HB2  | ASP | 17 | 23.970 | 4.389 | 14.595 | 1.00 |
| 29.52      |     | H    |     |    |        |       |        |      |
| ATOM       | 203 | N    | THR | 18 | 25.228 | 6.659 | 17.497 | 1.00 |
| 11.55      |     | N    |     |    |        |       |        |      |
| ATOM       | 204 | CA   | THR | 18 | 25.892 | 7.960 | 17.446 | 1.00 |
| 17.10      |     | C    |     |    |        |       |        |      |
| ATOM       | 205 | C    | THR | 18 | 27.320 | 7.778 | 16.954 | 1.00 |
| 10.63      |     | C    |     |    |        |       |        |      |
| ATOM       | 206 | O    | THR | 18 | 27.864 | 6.678 | 17.022 | 1.00 |
| 6.49       |     | O    |     |    |        |       |        |      |
| ATOM       | 207 | CB   | THR | 18 | 25.908 | 8.606 | 18.832 | 1.00 |
| 28.52      |     | C    |     |    |        |       |        |      |

|            |     |      |     |    |        |        |        |      |
|------------|-----|------|-----|----|--------|--------|--------|------|
| ATOM       | 208 | CG2  | THR | 18 | 24.514 | 9.122  | 19.181 | 1.00 |
| 45.38      |     |      | C   |    |        |        |        |      |
| ATOM       | 209 | OG1  | THR | 18 | 26.319 | 7.648  | 19.793 | 1.00 |
| 26.49      |     |      | O   |    |        |        |        |      |
| ATOM       | 210 | HN   | THR | 18 | 25.384 | 6.074  | 18.268 | 1.00 |
| 13.96      |     |      | H   |    |        |        |        |      |
| ATOM       | 211 | HA   | THR | 18 | 25.363 | 8.611  | 16.761 | 1.00 |
| 26.43      |     |      | H   |    |        |        |        |      |
| ATOM       | 212 | HB   | THR | 18 | 26.601 | 9.433  | 18.835 | 1.00 |
| 37.43      |     |      | H   |    |        |        |        |      |
| ATOM       | 213 | HG1  | THR | 18 | 25.574 | 7.070  | 19.973 | 1.00 |
| 71.62      |     |      | H   |    |        |        |        |      |
| ATOM       | 214 | HG21 | THR | 18 | 23.778 | 8.376  | 18.922 |      |
| 1.00100.44 |     |      |     |    |        |        |        | H    |
| ATOM       | 215 | HG22 | THR | 18 | 24.320 | 10.030 | 18.629 |      |
| 1.00129.42 |     |      |     |    |        |        |        | H    |
| ATOM       | 216 | HG23 | THR | 18 | 24.463 | 9.327  | 20.239 |      |
| 1.00156.21 |     |      |     |    |        |        |        | H    |
| ATOM       | 217 | N    | VAL | 19 | 27.923 | 8.858  | 16.476 | 1.00 |
| 16.32      |     |      | N   |    |        |        |        |      |
| ATOM       | 218 | CA   | VAL | 19 | 29.281 | 8.819  | 15.988 | 1.00 |
| 13.34      |     |      | C   |    |        |        |        |      |
| ATOM       | 219 | C    | VAL | 19 | 29.676 | 10.195 | 15.503 | 1.00 |
| 25.88      |     |      | C   |    |        |        |        |      |
| ATOM       | 220 | O    | VAL | 19 | 29.085 | 10.754 | 14.579 | 1.00 |
| 42.11      |     |      | O   |    |        |        |        |      |
| ATOM       | 221 | CB   | VAL | 19 | 29.448 | 7.804  | 14.856 | 1.00 |
| 15.48      |     |      | C   |    |        |        |        |      |
| ATOM       | 222 | CG1  | VAL | 19 | 28.403 | 8.052  | 13.765 | 1.00 |
| 29.06      |     |      | C   |    |        |        |        |      |
| ATOM       | 223 | CG2  | VAL | 19 | 30.856 | 7.951  | 14.264 | 1.00 |
| 20.67      |     |      | C   |    |        |        |        |      |
| ATOM       | 224 | HN   | VAL | 19 | 27.452 | 9.711  | 16.465 | 1.00 |
| 26.89      |     |      | H   |    |        |        |        |      |
| ATOM       | 225 | HA   | VAL | 19 | 29.931 | 8.538  | 16.804 | 1.00 |
| 8.08       |     |      | H   |    |        |        |        |      |
| ATOM       | 226 | HB   | VAL | 19 | 29.329 | 6.811  | 15.252 | 1.00 |
| 11.49      |     |      | H   |    |        |        |        |      |
| ATOM       | 227 | HG11 | VAL | 19 | 27.439 | 8.230  | 14.219 |      |
| 1.00137.43 |     |      |     |    |        |        |        | H    |
| ATOM       | 228 | HG12 | VAL | 19 | 28.342 | 7.185  | 13.123 | 1.00 |
| 93.29      |     |      | H   |    |        |        |        |      |
| ATOM       | 229 | HG13 | VAL | 19 | 28.689 | 8.913  | 13.178 |      |
| 1.00108.69 |     |      |     |    |        |        |        | H    |
| ATOM       | 230 | HG21 | VAL | 19 | 30.894 | 8.837  | 13.645 | 1.00 |
| 99.42      |     |      | H   |    |        |        |        |      |
| ATOM       | 231 | HG22 | VAL | 19 | 31.091 | 7.083  | 13.668 |      |
| 1.00111.36 |     |      |     |    |        |        |        | H    |
| ATOM       | 232 | HG23 | VAL | 19 | 31.577 | 8.046  | 15.067 | 1.00 |
| 77.11      |     |      | H   |    |        |        |        |      |
| ATOM       | 233 | N    | PHE | 20 | 30.672 | 10.732 | 16.161 | 1.00 |
| 24.58      |     |      | N   |    |        |        |        |      |

|            |     |     |     |    |        |        |        |      |
|------------|-----|-----|-----|----|--------|--------|--------|------|
| ATOM       | 234 | CA  | PHE | 20 | 31.184 | 12.056 | 15.859 | 1.00 |
| 40.34      |     |     | C   |    |        |        |        |      |
| ATOM       | 235 | C   | PHE | 20 | 32.490 | 11.982 | 15.086 | 1.00 |
| 40.37      |     |     | C   |    |        |        |        |      |
| ATOM       | 236 | O   | PHE | 20 | 32.615 | 12.565 | 14.010 | 1.00 |
| 66.02      |     |     | O   |    |        |        |        |      |
| ATOM       | 237 | CB  | PHE | 20 | 31.397 | 12.825 | 17.171 | 1.00 |
| 48.79      |     |     | C   |    |        |        |        |      |
| ATOM       | 238 | CG  | PHE | 20 | 31.868 | 11.897 | 18.282 | 1.00 |
| 35.75      |     |     | C   |    |        |        |        |      |
| ATOM       | 239 | CD1 | PHE | 20 | 31.017 | 10.895 | 18.797 | 1.00 |
| 30.20      |     |     | C   |    |        |        |        |      |
| ATOM       | 240 | CD2 | PHE | 20 | 33.152 | 12.055 | 18.820 | 1.00 |
| 40.95      |     |     | C   |    |        |        |        |      |
| ATOM       | 241 | CE1 | PHE | 20 | 31.459 | 10.067 | 19.832 | 1.00 |
| 30.41      |     |     | C   |    |        |        |        |      |
| ATOM       | 242 | CE2 | PHE | 20 | 33.589 | 11.220 | 19.855 | 1.00 |
| 45.84      |     |     | C   |    |        |        |        |      |
| ATOM       | 243 | CZ  | PHE | 20 | 32.743 | 10.228 | 20.361 | 1.00 |
| 40.81      |     |     | C   |    |        |        |        |      |
| ATOM       | 244 | HN  | PHE | 20 | 31.061 | 10.223 | 16.892 | 1.00 |
| 16.73      |     |     | H   |    |        |        |        |      |
| ATOM       | 245 | HA  | PHE | 20 | 30.461 | 12.594 | 15.258 | 1.00 |
| 59.91      |     |     | H   |    |        |        |        |      |
| ATOM       | 246 | HB1 | PHE | 20 | 30.474 | 13.268 | 17.461 | 1.00 |
| 67.15      |     |     | H   |    |        |        |        |      |
| ATOM       | 247 | HB2 | PHE | 20 | 32.128 | 13.609 | 17.022 | 1.00 |
| 58.17      |     |     | H   |    |        |        |        |      |
| ATOM       | 248 | HD1 | PHE | 20 | 30.022 | 10.754 | 18.395 | 1.00 |
| 33.34      |     |     | H   |    |        |        |        |      |
| ATOM       | 249 | HD2 | PHE | 20 | 33.808 | 12.818 | 18.433 | 1.00 |
| 49.35      |     |     | H   |    |        |        |        |      |
| ATOM       | 250 | HE1 | PHE | 20 | 30.805 | 9.303  | 20.223 | 1.00 |
| 30.61      |     |     | H   |    |        |        |        |      |
| ATOM       | 251 | HE2 | PHE | 20 | 34.579 | 11.343 | 20.266 | 1.00 |
| 61.27      |     |     | H   |    |        |        |        |      |
| ATOM       | 252 | HZ  | PHE | 20 | 33.081 | 9.586  | 21.161 | 1.00 |
| 52.66      |     |     | H   |    |        |        |        |      |
| ATOM       | 253 | N   | GLU | 21 | 33.478 | 11.298 | 15.657 | 1.00 |
| 41.31      |     |     | N   |    |        |        |        |      |
| ATOM       | 254 | CA  | GLU | 21 | 34.781 | 11.195 | 15.045 | 1.00 |
| 56.16      |     |     | C   |    |        |        |        |      |
| ATOM       | 255 | C   | GLU | 21 | 35.089 | 9.769  | 14.609 | 1.00 |
| 58.61      |     |     | C   |    |        |        |        |      |
| ATOM       | 256 | O   | GLU | 21 | 34.238 | 8.882  | 14.682 |      |
| 1.00201.19 |     |     | O   |    |        |        |        |      |
| ATOM       | 257 | CB  | GLU | 21 | 35.780 | 11.665 | 16.075 | 1.00 |
| 57.37      |     |     | C   |    |        |        |        |      |
| ATOM       | 258 | CG  | GLU | 21 | 35.804 | 10.687 | 17.248 |      |
| 1.00193.56 |     |     | C   |    |        |        |        |      |
| ATOM       | 259 | CD  | GLU | 21 | 36.625 | 11.273 | 18.392 |      |
| 1.00304.62 |     |     | C   |    |        |        |        |      |

|            |     |     |     |    |        |        |        |      |
|------------|-----|-----|-----|----|--------|--------|--------|------|
| ATOM       | 260 | OE1 | GLU | 21 | 36.667 | 10.657 | 19.444 |      |
| 1.00451.81 |     |     |     |    |        |        |        | O    |
| ATOM       | 261 | OE2 | GLU | 21 | 37.201 | 12.332 | 18.199 |      |
| 1.00442.88 |     |     |     |    |        |        |        | O1-  |
| ATOM       | 262 | HN  | GLU | 21 | 33.344 | 10.883 | 16.532 | 1.00 |
| 50.82      |     |     | H   |    |        |        |        |      |
| ATOM       | 263 | HA  | GLU | 21 | 34.842 | 11.847 | 14.184 | 1.00 |
| 85.72      |     |     | H   |    |        |        |        |      |
| ATOM       | 264 | HB1 | GLU | 21 | 35.475 | 12.635 | 16.430 | 1.00 |
| 46.37      |     |     | H   |    |        |        |        |      |
| ATOM       | 265 | HB2 | GLU | 21 | 36.751 | 11.725 | 15.631 |      |
| 1.00131.81 |     |     |     |    |        |        |        | H    |
| ATOM       | 266 | HG1 | GLU | 21 | 36.244 | 9.759  | 16.929 |      |
| 1.00314.91 |     |     |     |    |        |        |        | H    |
| ATOM       | 267 | HG2 | GLU | 21 | 34.796 | 10.505 | 17.582 |      |
| 1.00266.92 |     |     |     |    |        |        |        | H    |
| ATOM       | 268 | N   | GLY | 22 | 36.316 | 9.570  | 14.140 | 1.00 |
| 86.70      |     |     | N   |    |        |        |        |      |
| ATOM       | 269 | CA  | GLY | 22 | 36.755 | 8.254  | 13.666 |      |
| 1.00104.66 |     |     |     |    |        |        |        | C    |
| ATOM       | 270 | C   | GLY | 22 | 37.491 | 7.473  | 14.753 | 1.00 |
| 71.50      |     |     | C   |    |        |        |        |      |
| ATOM       | 271 | O   | GLY | 22 | 37.779 | 6.288  | 14.585 | 1.00 |
| 89.87      |     |     | O   |    |        |        |        |      |
| ATOM       | 272 | HN  | GLY | 22 | 36.936 | 10.330 | 14.105 |      |
| 1.00214.64 |     |     |     |    |        |        |        | H    |
| ATOM       | 273 | HA1 | GLY | 22 | 37.419 | 8.391  | 12.826 |      |
| 1.00152.47 |     |     |     |    |        |        |        | H    |
| ATOM       | 274 | HA2 | GLY | 22 | 35.895 | 7.682  | 13.344 |      |
| 1.00118.15 |     |     |     |    |        |        |        | H    |
| ATOM       | 275 | N   | ASP | 23 | 37.800 | 8.136  | 15.860 | 1.00 |
| 44.68      |     |     | N   |    |        |        |        |      |
| ATOM       | 276 | CA  | ASP | 23 | 38.511 | 7.478  | 16.953 | 1.00 |
| 43.33      |     |     | C   |    |        |        |        |      |
| ATOM       | 277 | C   | ASP | 23 | 37.700 | 6.312  | 17.503 | 1.00 |
| 37.55      |     |     | C   |    |        |        |        |      |
| ATOM       | 278 | O   | ASP | 23 | 38.245 | 5.252  | 17.808 | 1.00 |
| 61.37      |     |     | O   |    |        |        |        |      |
| ATOM       | 279 | CB  | ASP | 23 | 38.786 | 8.478  | 18.076 | 1.00 |
| 40.74      |     |     | C   |    |        |        |        |      |
| ATOM       | 280 | CG  | ASP | 23 | 39.842 | 9.486  | 17.634 |      |
| 1.00141.86 |     |     |     |    |        |        |        | C    |
| ATOM       | 281 | OD1 | ASP | 23 | 40.488 | 9.234  | 16.630 |      |
| 1.00328.18 |     |     |     |    |        |        |        | O    |
| ATOM       | 282 | OD2 | ASP | 23 | 39.989 | 10.493 | 18.305 |      |
| 1.00304.58 |     |     |     |    |        |        |        | O1-  |
| ATOM       | 283 | HN  | ASP | 23 | 37.556 | 9.081  | 15.942 | 1.00 |
| 40.86      |     |     | H   |    |        |        |        |      |
| ATOM       | 284 | HA  | ASP | 23 | 39.451 | 7.105  | 16.582 | 1.00 |
| 72.12      |     |     | H   |    |        |        |        |      |
| ATOM       | 285 | HB1 | ASP | 23 | 39.142 | 7.948  | 18.947 | 1.00 |
| 94.15      |     |     | H   |    |        |        |        |      |

|            |     |     |     |    |        |       |        |      |
|------------|-----|-----|-----|----|--------|-------|--------|------|
| ATOM       | 286 | HB2 | ASP | 23 | 37.873 | 8.997 | 18.323 | 1.00 |
| 93.26      |     | H   |     |    |        |       |        |      |
| ATOM       | 287 | N   | MET | 24 | 36.397 | 6.519 | 17.631 | 1.00 |
| 23.24      |     | N   |     |    |        |       |        |      |
| ATOM       | 288 | CA  | MET | 24 | 35.517 | 5.478 | 18.150 | 1.00 |
| 32.50      |     | C   |     |    |        |       |        |      |
| ATOM       | 289 | C   | MET | 24 | 34.060 | 5.783 | 17.818 | 1.00 |
| 25.13      |     | C   |     |    |        |       |        |      |
| ATOM       | 290 | O   | MET | 24 | 33.730 | 6.880 | 17.366 | 1.00 |
| 54.40      |     | O   |     |    |        |       |        |      |
| ATOM       | 291 | CB  | MET | 24 | 35.689 | 5.357 | 19.666 | 1.00 |
| 47.36      |     | C   |     |    |        |       |        |      |
| ATOM       | 292 | CG  | MET | 24 | 35.315 | 6.680 | 20.337 |      |
| 1.00151.73 |     |     | C   |    |        |       |        |      |
| ATOM       | 293 | SD  | MET | 24 | 35.637 | 6.565 | 22.115 |      |
| 1.00209.23 |     |     | S   |    |        |       |        |      |
| ATOM       | 294 | CE  | MET | 24 | 35.098 | 8.235 | 22.556 |      |
| 1.00243.29 |     |     | C   |    |        |       |        |      |
| ATOM       | 295 | HN  | MET | 24 | 36.021 | 7.386 | 17.374 | 1.00 |
| 17.32      |     | H   |     |    |        |       |        |      |
| ATOM       | 296 | HA  | MET | 24 | 35.787 | 4.537 | 17.695 | 1.00 |
| 48.94      |     | H   |     |    |        |       |        |      |
| ATOM       | 297 | HB1 | MET | 24 | 36.718 | 5.120 | 19.893 |      |
| 1.00124.40 |     |     | H   |    |        |       |        |      |
| ATOM       | 298 | HB2 | MET | 24 | 35.048 | 4.571 | 20.038 |      |
| 1.00166.96 |     |     | H   |    |        |       |        |      |
| ATOM       | 299 | HG1 | MET | 24 | 34.267 | 6.883 | 20.174 |      |
| 1.00331.71 |     |     | H   |    |        |       |        |      |
| ATOM       | 300 | HG2 | MET | 24 | 35.907 | 7.478 | 19.915 |      |
| 1.00302.30 |     |     | H   |    |        |       |        |      |
| ATOM       | 301 | HE1 | MET | 24 | 35.664 | 8.582 | 23.408 |      |
| 1.00340.44 |     |     | H   |    |        |       |        |      |
| ATOM       | 302 | HE2 | MET | 24 | 34.049 | 8.221 | 22.805 |      |
| 1.00373.88 |     |     | H   |    |        |       |        |      |
| ATOM       | 303 | HE3 | MET | 24 | 35.258 | 8.897 | 21.716 |      |
| 1.00386.81 |     |     | H   |    |        |       |        |      |
| ATOM       | 304 | N   | VAL | 25 | 33.191 | 4.800 | 18.048 | 1.00 |
| 22.44      |     | N   |     |    |        |       |        |      |
| ATOM       | 305 | CA  | VAL | 25 | 31.758 | 4.949 | 17.776 | 1.00 |
| 15.37      |     | C   |     |    |        |       |        |      |
| ATOM       | 306 | C   | VAL | 25 | 30.952 | 4.789 | 19.059 | 1.00 |
| 17.47      |     | C   |     |    |        |       |        |      |
| ATOM       | 307 | O   | VAL | 25 | 31.291 | 3.985 | 19.928 | 1.00 |
| 29.52      |     | O   |     |    |        |       |        |      |
| ATOM       | 308 | CB  | VAL | 25 | 31.304 | 3.905 | 16.751 | 1.00 |
| 23.36      |     | C   |     |    |        |       |        |      |
| ATOM       | 309 | CG1 | VAL | 25 | 29.776 | 3.959 | 16.598 | 1.00 |
| 58.39      |     | C   |     |    |        |       |        |      |
| ATOM       | 310 | CG2 | VAL | 25 | 31.969 | 4.199 | 15.403 | 1.00 |
| 55.25      |     | C   |     |    |        |       |        |      |
| ATOM       | 311 | HN  | VAL | 25 | 33.519 | 3.949 | 18.409 | 1.00 |
| 48.11      |     | H   |     |    |        |       |        |      |

|            |     |      |     |    |        |       |        |      |
|------------|-----|------|-----|----|--------|-------|--------|------|
| ATOM       | 312 | HA   | VAL | 25 | 31.566 | 5.939 | 17.373 | 1.00 |
| 9.25       |     | H    |     |    |        |       |        |      |
| ATOM       | 313 | HB   | VAL | 25 | 31.595 | 2.920 | 17.090 | 1.00 |
| 52.45      |     | H    |     |    |        |       |        |      |
| ATOM       | 314 | HG11 | VAL | 25 | 29.443 | 4.986 | 16.649 |      |
| 1.00171.07 |     |      | H   |    |        |       |        |      |
| ATOM       | 315 | HG12 | VAL | 25 | 29.317 | 3.396 | 17.398 |      |
| 1.00166.22 |     |      | H   |    |        |       |        |      |
| ATOM       | 316 | HG13 | VAL | 25 | 29.488 | 3.532 | 15.648 |      |
| 1.00134.76 |     |      | H   |    |        |       |        |      |
| ATOM       | 317 | HG21 | VAL | 25 | 31.499 | 5.060 | 14.951 |      |
| 1.00141.88 |     |      | H   |    |        |       |        |      |
| ATOM       | 318 | HG22 | VAL | 25 | 31.858 | 3.345 | 14.752 |      |
| 1.00184.50 |     |      | H   |    |        |       |        |      |
| ATOM       | 319 | HG23 | VAL | 25 | 33.019 | 4.401 | 15.555 |      |
| 1.00133.90 |     |      | H   |    |        |       |        |      |
| ATOM       | 320 | N    | THR | 26 | 29.888 | 5.579 | 19.169 | 1.00 |
| 13.60      |     | N    |     |    |        |       |        |      |
| ATOM       | 321 | CA   | THR | 26 | 29.021 | 5.559 | 20.347 | 1.00 |
| 21.19      |     | C    |     |    |        |       |        |      |
| ATOM       | 322 | C    | THR | 26 | 27.603 | 5.124 | 19.981 | 1.00 |
| 16.55      |     | C    |     |    |        |       |        |      |
| ATOM       | 323 | O    | THR | 26 | 27.050 | 5.555 | 18.970 | 1.00 |
| 11.43      |     | O    |     |    |        |       |        |      |
| ATOM       | 324 | CB   | THR | 26 | 28.986 | 6.960 | 20.954 | 1.00 |
| 27.07      |     | C    |     |    |        |       |        |      |
| ATOM       | 325 | CG2  | THR | 26 | 28.058 | 6.982 | 22.173 | 1.00 |
| 44.39      |     | C    |     |    |        |       |        |      |
| ATOM       | 326 | OG1  | THR | 26 | 30.299 | 7.325 | 21.354 | 1.00 |
| 34.75      |     | O    |     |    |        |       |        |      |
| ATOM       | 327 | HN   | THR | 26 | 29.684 | 6.203 | 18.442 | 1.00 |
| 10.81      |     | H    |     |    |        |       |        |      |
| ATOM       | 328 | HA   | THR | 26 | 29.419 | 4.873 | 21.084 | 1.00 |
| 33.16      |     | H    |     |    |        |       |        |      |
| ATOM       | 329 | HB   | THR | 26 | 28.627 | 7.658 | 20.210 | 1.00 |
| 20.60      |     | H    |     |    |        |       |        |      |
| ATOM       | 330 | HG1  | THR | 26 | 30.917 | 6.959 | 20.716 | 1.00 |
| 77.72      |     | H    |     |    |        |       |        |      |
| ATOM       | 331 | HG21 | THR | 26 | 28.346 | 6.198 | 22.856 |      |
| 1.00126.99 |     |      | H   |    |        |       |        |      |
| ATOM       | 332 | HG22 | THR | 26 | 27.039 | 6.827 | 21.858 |      |
| 1.00108.32 |     |      | H   |    |        |       |        |      |
| ATOM       | 333 | HG23 | THR | 26 | 28.140 | 7.937 | 22.668 |      |
| 1.00151.99 |     |      | H   |    |        |       |        |      |
| ATOM       | 334 | N    | ARG | 27 | 27.021 | 4.268 | 20.823 | 1.00 |
| 22.38      |     | N    |     |    |        |       |        |      |
| ATOM       | 335 | CA   | ARG | 27 | 25.659 | 3.766 | 20.610 | 1.00 |
| 20.21      |     | C    |     |    |        |       |        |      |
| ATOM       | 336 | C    | ARG | 27 | 24.817 | 4.030 | 21.856 | 1.00 |
| 16.96      |     | C    |     |    |        |       |        |      |
| ATOM       | 337 | O    | ARG | 27 | 25.360 | 4.173 | 22.952 | 1.00 |
| 20.06      |     | O    |     |    |        |       |        |      |

|            |     |      |     |    |        |        |        |      |
|------------|-----|------|-----|----|--------|--------|--------|------|
| ATOM       | 338 | CB   | ARG | 27 | 25.698 | 2.262  | 20.333 | 1.00 |
| 22.14      |     |      | C   |    |        |        |        |      |
| ATOM       | 339 | CG   | ARG | 27 | 26.549 | 1.990  | 19.090 |      |
| 1.00124.30 |     |      | C   |    |        |        |        |      |
| ATOM       | 340 | CD   | ARG | 27 | 26.775 | 0.484  | 18.947 |      |
| 1.00109.38 |     |      | C   |    |        |        |        |      |
| ATOM       | 341 | NE   | ARG | 27 | 27.556 | -0.016 | 20.073 |      |
| 1.00227.73 |     |      | N   |    |        |        |        |      |
| ATOM       | 342 | CZ   | ARG | 27 | 27.809 | -1.313 | 20.211 |      |
| 1.00426.12 |     |      | C   |    |        |        |        |      |
| ATOM       | 343 | NH1  | ARG | 27 | 28.512 | -1.735 | 21.225 |      |
| 1.00767.09 |     |      | N1+ |    |        |        |        |      |
| ATOM       | 344 | NH2  | ARG | 27 | 27.353 | -2.165 | 19.333 |      |
| 1.00581.78 |     |      | N   |    |        |        |        |      |
| ATOM       | 345 | HN   | ARG | 27 | 27.518 | 3.969  | 21.612 | 1.00 |
| 30.75      |     |      | H   |    |        |        |        |      |
| ATOM       | 346 | HA   | ARG | 27 | 25.208 | 4.270  | 19.765 | 1.00 |
| 23.13      |     |      | H   |    |        |        |        |      |
| ATOM       | 347 | HB1  | ARG | 27 | 24.694 | 1.901  | 20.164 | 1.00 |
| 87.46      |     |      | H   |    |        |        |        |      |
| ATOM       | 348 | HB2  | ARG | 27 | 26.126 | 1.751  | 21.182 |      |
| 1.00103.36 |     |      | H   |    |        |        |        |      |
| ATOM       | 349 | HG1  | ARG | 27 | 27.503 | 2.487  | 19.191 |      |
| 1.00281.97 |     |      | H   |    |        |        |        |      |
| ATOM       | 350 | HG2  | ARG | 27 | 26.038 | 2.363  | 18.215 |      |
| 1.00276.19 |     |      | H   |    |        |        |        |      |
| ATOM       | 351 | HD1  | ARG | 27 | 27.305 | 0.290  | 18.026 |      |
| 1.00183.60 |     |      | H   |    |        |        |        |      |
| ATOM       | 352 | HD2  | ARG | 27 | 25.821 | -0.019 | 18.924 |      |
| 1.00142.93 |     |      | H   |    |        |        |        |      |
| ATOM       | 353 | HE   | ARG | 27 | 27.901 | 0.615  | 20.738 |      |
| 1.00372.53 |     |      | H   |    |        |        |        |      |
| ATOM       | 354 | HH11 | ARG | 27 | 28.860 | -1.083 | 21.899 |      |
| 1.00910.59 |     |      | H   |    |        |        |        |      |
| ATOM       | 355 | HH12 | ARG | 27 | 28.702 | -2.711 | 21.330 |      |
| 1.00999.99 |     |      | H   |    |        |        |        |      |
| ATOM       | 356 | HH21 | ARG | 27 | 26.814 | -1.840 | 18.555 |      |
| 1.00532.54 |     |      | H   |    |        |        |        |      |
| ATOM       | 357 | HH22 | ARG | 27 | 27.544 | -3.140 | 19.438 |      |
| 1.00948.84 |     |      | H   |    |        |        |        |      |
| ATOM       | 358 | N    | SER | 28 | 23.493 | 4.100  | 21.696 | 1.00 |
| 14.60      |     |      | N   |    |        |        |        |      |
| ATOM       | 359 | CA   | SER | 28 | 22.616 | 4.358  | 22.841 | 1.00 |
| 14.92      |     |      | C   |    |        |        |        |      |
| ATOM       | 360 | C    | SER | 28 | 21.270 | 3.662  | 22.674 | 1.00 |
| 12.12      |     |      | C   |    |        |        |        |      |
| ATOM       | 361 | O    | SER | 28 | 20.862 | 3.317  | 21.566 | 1.00 |
| 13.41      |     |      | O   |    |        |        |        |      |
| ATOM       | 362 | CB   | SER | 28 | 22.396 | 5.862  | 22.997 | 1.00 |
| 23.26      |     |      | C   |    |        |        |        |      |
| ATOM       | 363 | OG   | SER | 28 | 21.680 | 6.351  | 21.872 |      |
| 1.00146.32 |     |      | O   |    |        |        |        |      |

|            |     |     |     |    |        |       |        |      |
|------------|-----|-----|-----|----|--------|-------|--------|------|
| ATOM       | 364 | HN  | SER | 28 | 23.102 | 3.986 | 20.802 | 1.00 |
| 15.23      |     |     | H   |    |        |       |        |      |
| ATOM       | 365 | HA  | SER | 28 | 23.086 | 3.984 | 23.740 | 1.00 |
| 15.44      |     |     | H   |    |        |       |        |      |
| ATOM       | 366 | HB1 | SER | 28 | 23.355 | 6.359 | 23.070 | 1.00 |
| 88.73      |     |     | H   |    |        |       |        |      |
| ATOM       | 367 | HB2 | SER | 28 | 21.827 | 6.054 | 23.891 |      |
| 1.00124.68 |     |     |     |    |        |       |        | H    |
| ATOM       | 368 | HG  | SER | 28 | 20.812 | 5.941 | 21.872 |      |
| 1.00242.47 |     |     |     |    |        |       |        | H    |
| ATOM       | 369 | N   | CYS | 29 | 20.584 | 3.468 | 23.798 | 1.00 |
| 10.48      |     |     | N   |    |        |       |        |      |
| ATOM       | 370 | CA  | CYS | 29 | 19.278 | 2.822 | 23.803 | 1.00 |
| 9.97       |     |     | C   |    |        |       |        |      |
| ATOM       | 371 | C   | CYS | 29 | 18.705 | 2.859 | 25.218 | 1.00 |
| 11.60      |     |     | C   |    |        |       |        |      |
| ATOM       | 372 | O   | CYS | 29 | 19.427 | 2.627 | 26.189 | 1.00 |
| 15.64      |     |     | O   |    |        |       |        |      |
| ATOM       | 373 | CB  | CYS | 29 | 19.399 | 1.370 | 23.315 | 1.00 |
| 9.52       |     |     | C   |    |        |       |        |      |
| ATOM       | 374 | SG  | CYS | 29 | 17.849 | 0.854 | 22.574 | 1.00 |
| 10.40      |     |     | S   |    |        |       |        |      |
| ATOM       | 375 | HN  | CYS | 29 | 20.964 | 3.776 | 24.647 | 1.00 |
| 11.10      |     |     | H   |    |        |       |        |      |
| ATOM       | 376 | HA  | CYS | 29 | 18.617 | 3.363 | 23.142 | 1.00 |
| 11.08      |     |     | H   |    |        |       |        |      |
| ATOM       | 377 | HB1 | CYS | 29 | 19.617 | 0.711 | 24.142 | 1.00 |
| 9.33       |     |     | H   |    |        |       |        |      |
| ATOM       | 378 | HB2 | CYS | 29 | 20.183 | 1.293 | 22.580 | 1.00 |
| 10.78      |     |     | H   |    |        |       |        |      |
| ATOM       | 379 | N   | GLU | 30 | 17.412 | 3.159 | 25.336 | 1.00 |
| 13.52      |     |     | N   |    |        |       |        |      |
| ATOM       | 380 | CA  | GLU | 30 | 16.763 | 3.234 | 26.649 | 1.00 |
| 17.41      |     |     | C   |    |        |       |        |      |
| ATOM       | 381 | C   | GLU | 30 | 15.779 | 2.085 | 26.837 | 1.00 |
| 10.81      |     |     | C   |    |        |       |        |      |
| ATOM       | 382 | O   | GLU | 30 | 14.988 | 1.777 | 25.946 | 1.00 |
| 23.22      |     |     | O   |    |        |       |        |      |
| ATOM       | 383 | CB  | GLU | 30 | 16.025 | 4.567 | 26.780 | 1.00 |
| 37.83      |     |     | C   |    |        |       |        |      |
| ATOM       | 384 | CG  | GLU | 30 | 17.030 | 5.714 | 26.659 |      |
| 1.00108.13 |     |     |     |    |        |       |        | C    |
| ATOM       | 385 | CD  | GLU | 30 | 17.929 | 5.750 | 27.890 |      |
| 1.00240.52 |     |     |     |    |        |       |        | C    |
| ATOM       | 386 | OE1 | GLU | 30 | 17.580 | 5.119 | 28.873 |      |
| 1.00422.56 |     |     |     |    |        |       |        | O    |
| ATOM       | 387 | OE2 | GLU | 30 | 18.954 | 6.410 | 27.831 |      |
| 1.00410.81 |     |     |     |    |        |       |        | O1-  |
| ATOM       | 388 | HN  | GLU | 30 | 16.886 | 3.343 | 24.529 | 1.00 |
| 15.61      |     |     | H   |    |        |       |        |      |
| ATOM       | 389 | HA  | GLU | 30 | 17.510 | 3.180 | 27.429 | 1.00 |
| 24.60      |     |     | H   |    |        |       |        |      |



|            |     |     |     |    |        |        |        |      |
|------------|-----|-----|-----|----|--------|--------|--------|------|
| ATOM       | 390 | HB1 | GLU | 30 | 15.538 | 4.617  | 27.742 | 1.00 |
| 72.67      |     |     | H   |    |        |        |        |      |
| ATOM       | 391 | HB2 | GLU | 30 | 15.285 | 4.648  | 25.995 | 1.00 |
| 56.47      |     |     | H   |    |        |        |        |      |
| ATOM       | 392 | HG1 | GLU | 30 | 16.498 | 6.650  | 26.576 |      |
| 1.00196.66 |     |     | H   |    |        |        |        |      |
| ATOM       | 393 | HG2 | GLU | 30 | 17.636 | 5.567  | 25.778 |      |
| 1.00140.67 |     |     | H   |    |        |        |        |      |
| ATOM       | 394 | N   | LYS | 31 | 15.833 | 1.460  | 28.010 | 1.00 |
| 11.96      |     |     | N   |    |        |        |        |      |
| ATOM       | 395 | CA  | LYS | 31 | 14.941 | 0.347  | 28.320 | 1.00 |
| 11.40      |     |     | C   |    |        |        |        |      |
| ATOM       | 396 | C   | LYS | 31 | 13.630 | 0.881  | 28.885 | 1.00 |
| 10.99      |     |     | C   |    |        |        |        |      |
| ATOM       | 397 | O   | LYS | 31 | 13.626 | 1.835  | 29.662 | 1.00 |
| 12.86      |     |     | O   |    |        |        |        |      |
| ATOM       | 398 | CB  | LYS | 31 | 15.596 | -0.579 | 29.352 | 1.00 |
| 21.40      |     |     | C   |    |        |        |        |      |
| ATOM       | 399 | CG  | LYS | 31 | 17.033 | -0.920 | 28.932 | 1.00 |
| 57.81      |     |     | C   |    |        |        |        |      |
| ATOM       | 400 | CD  | LYS | 31 | 17.034 | -1.734 | 27.633 |      |
| 1.00115.52 |     |     | C   |    |        |        |        |      |
| ATOM       | 401 | CE  | LYS | 31 | 18.440 | -2.282 | 27.383 |      |
| 1.00250.23 |     |     | C   |    |        |        |        |      |
| ATOM       | 402 | NZ  | LYS | 31 | 18.451 | -3.056 | 26.109 |      |
| 1.00462.10 |     |     | N1+ |    |        |        |        |      |
| ATOM       | 403 | HN  | LYS | 31 | 16.483 | 1.755  | 28.682 | 1.00 |
| 26.13      |     |     | H   |    |        |        |        |      |
| ATOM       | 404 | HA  | LYS | 31 | 14.732 | -0.212 | 27.423 | 1.00 |
| 13.87      |     |     | H   |    |        |        |        |      |
| ATOM       | 405 | HB1 | LYS | 31 | 15.022 | -1.491 | 29.428 | 1.00 |
| 37.63      |     |     | H   |    |        |        |        |      |
| ATOM       | 406 | HB2 | LYS | 31 | 15.612 | -0.087 | 30.313 | 1.00 |
| 47.19      |     |     | H   |    |        |        |        |      |
| ATOM       | 407 | HG1 | LYS | 31 | 17.506 | -1.497 | 29.713 |      |
| 1.00126.32 |     |     | H   |    |        |        |        |      |
| ATOM       | 408 | HG2 | LYS | 31 | 17.587 | -0.005 | 28.780 |      |
| 1.00114.19 |     |     | H   |    |        |        |        |      |
| ATOM       | 409 | HD1 | LYS | 31 | 16.751 | -1.099 | 26.808 |      |
| 1.00198.45 |     |     | H   |    |        |        |        |      |
| ATOM       | 410 | HD2 | LYS | 31 | 16.334 | -2.552 | 27.718 |      |
| 1.00200.14 |     |     | H   |    |        |        |        |      |
| ATOM       | 411 | HE1 | LYS | 31 | 18.725 | -2.929 | 28.199 |      |
| 1.00374.64 |     |     | H   |    |        |        |        |      |
| ATOM       | 412 | HE2 | LYS | 31 | 19.138 | -1.463 | 27.312 |      |
| 1.00403.27 |     |     | H   |    |        |        |        |      |
| ATOM       | 413 | HZ1 | LYS | 31 | 18.341 | -4.068 | 26.316 |      |
| 1.00627.38 |     |     | H   |    |        |        |        |      |
| ATOM       | 414 | HZ2 | LYS | 31 | 19.355 | -2.898 | 25.616 |      |
| 1.00622.26 |     |     | H   |    |        |        |        |      |
| ATOM       | 415 | HZ3 | LYS | 31 | 17.667 | -2.742 | 25.504 |      |
| 1.00619.20 |     |     | H   |    |        |        |        |      |

|            |     |      |     |    |        |        |        |      |
|------------|-----|------|-----|----|--------|--------|--------|------|
| ATOM       | 416 | N    | THR | 32 | 12.517 | 0.267  | 28.490 | 1.00 |
| 15.51      |     |      | N   |    |        |        |        |      |
| ATOM       | 417 | CA   | THR | 32 | 11.206 | 0.702  | 28.967 | 1.00 |
| 22.44      |     |      | C   |    |        |        |        |      |
| ATOM       | 418 | C    | THR | 32 | 10.827 | -0.036 | 30.247 | 1.00 |
| 26.60      |     |      | C   |    |        |        |        |      |
| ATOM       | 419 | O    | THR | 32 | 10.412 | -1.195 | 30.211 | 1.00 |
| 57.43      |     |      | O   |    |        |        |        |      |
| ATOM       | 420 | CB   | THR | 32 | 10.148 | 0.437  | 27.892 | 1.00 |
| 56.28      |     |      | C   |    |        |        |        |      |
| ATOM       | 421 | CG2  | THR | 32 | 8.781  | 0.908  | 28.391 |      |
| 1.00102.70 |     |      |     |    |        |        |        | C    |
| ATOM       | 422 | OG1  | THR | 32 | 10.492 | 1.146  | 26.709 |      |
| 1.00111.17 |     |      |     |    |        |        |        | O    |
| ATOM       | 423 | HN   | THR | 32 | 12.578 | -0.487 | 27.867 | 1.00 |
| 18.79      |     |      | H   |    |        |        |        |      |
| ATOM       | 424 | HA   | THR | 32 | 11.233 | 1.763  | 29.170 | 1.00 |
| 19.67      |     |      | H   |    |        |        |        |      |
| ATOM       | 425 | HB   | THR | 32 | 10.104 | -0.620 | 27.680 | 1.00 |
| 84.25      |     |      | H   |    |        |        |        |      |
| ATOM       | 426 | HG1  | THR | 32 | 9.680  | 1.463  | 26.306 |      |
| 1.00205.03 |     |      |     |    |        |        |        | H    |
| ATOM       | 427 | HG21 | THR | 32 | 8.407  | 0.210  | 29.126 |      |
| 1.00220.71 |     |      |     |    |        |        |        | H    |
| ATOM       | 428 | HG22 | THR | 32 | 8.093  | 0.959  | 27.560 |      |
| 1.00174.67 |     |      |     |    |        |        |        | H    |
| ATOM       | 429 | HG23 | THR | 32 | 8.878  | 1.885  | 28.839 |      |
| 1.00217.44 |     |      |     |    |        |        |        | H    |
| ATOM       | 430 | N    | THR | 33 | 10.964 | 0.654  | 31.377 | 1.00 |
| 22.47      |     |      | N   |    |        |        |        |      |
| ATOM       | 431 | CA   | THR | 33 | 10.627 | 0.077  | 32.679 | 1.00 |
| 41.60      |     |      | C   |    |        |        |        |      |
| ATOM       | 432 | C    | THR | 33 | 9.903  | 1.088  | 33.517 | 1.00 |
| 38.03      |     |      | C   |    |        |        |        |      |
| ATOM       | 433 | O    | THR | 33 | 10.377 | 2.202  | 33.732 | 1.00 |
| 52.73      |     |      | O   |    |        |        |        |      |
| ATOM       | 434 | CB   | THR | 33 | 11.887 | -0.377 | 33.408 | 1.00 |
| 63.25      |     |      | C   |    |        |        |        |      |
| ATOM       | 435 | CG2  | THR | 33 | 11.495 | -1.193 | 34.641 |      |
| 1.00121.65 |     |      |     |    |        |        |        | C    |
| ATOM       | 436 | OG1  | THR | 33 | 12.676 | -1.179 | 32.540 | 1.00 |
| 96.20      |     |      | O   |    |        |        |        |      |
| ATOM       | 437 | HN   | THR | 33 | 11.292 | 1.576  | 31.335 | 1.00 |
| 23.82      |     |      | H   |    |        |        |        |      |
| ATOM       | 438 | HA   | THR | 33 | 9.968  | -0.761 | 32.560 | 1.00 |
| 67.12      |     |      | H   |    |        |        |        |      |
| ATOM       | 439 | HB   | THR | 33 | 12.446 | 0.486  | 33.719 |      |
| 1.00107.59 |     |      |     |    |        |        |        | H    |
| ATOM       | 440 | HG1  | THR | 33 | 12.111 | -1.487 | 31.827 |      |
| 1.00176.27 |     |      |     |    |        |        |        | H    |
| ATOM       | 441 | HG21 | THR | 33 | 10.931 | -0.571 | 35.320 |      |
| 1.00255.23 |     |      |     |    |        |        |        | H    |

|      |            |      |     |    |        |        |        |      |
|------|------------|------|-----|----|--------|--------|--------|------|
| ATOM | 442        | HG22 | THR | 33 | 12.388 | -1.549 | 35.135 |      |
|      | 1.00245.37 |      |     |    |        |        |        | H    |
| ATOM | 443        | HG23 | THR | 33 | 10.891 | -2.036 | 34.338 |      |
|      | 1.00185.78 |      |     |    |        |        |        | H    |
| ATOM | 444        | N    | GLY | 34 | 8.750  | 0.677  | 33.999 | 1.00 |
|      | 40.93      |      | N   |    |        |        |        |      |
| ATOM | 445        | CA   | GLY | 34 | 7.960  | 1.542  | 34.825 | 1.00 |
|      | 45.59      |      | C   |    |        |        |        |      |
| ATOM | 446        | C    | GLY | 34 | 7.496  | 2.761  | 34.037 | 1.00 |
|      | 40.97      |      | C   |    |        |        |        |      |
| ATOM | 447        | O    | GLY | 34 | 6.319  | 2.887  | 33.699 | 1.00 |
|      | 82.17      |      | O   |    |        |        |        |      |
| ATOM | 448        | HN   | GLY | 34 | 8.438  | -0.226 | 33.797 | 1.00 |
|      | 54.00      |      | H   |    |        |        |        |      |
| ATOM | 449        | HA1  | GLY | 34 | 8.579  | 1.854  | 35.633 | 1.00 |
|      | 54.41      |      | H   |    |        |        |        |      |
| ATOM | 450        | HA2  | GLY | 34 | 7.104  | 1.001  | 35.205 | 1.00 |
|      | 62.09      |      | H   |    |        |        |        |      |
| ATOM | 451        | N    | ASN | 35 | 8.441  | 3.652  | 33.733 | 1.00 |
|      | 32.51      |      | N   |    |        |        |        |      |
| ATOM | 452        | CA   | ASN | 35 | 8.147  | 4.865  | 32.965 | 1.00 |
|      | 33.20      |      | C   |    |        |        |        |      |
| ATOM | 453        | C    | ASN | 35 | 8.813  | 4.783  | 31.595 | 1.00 |
|      | 23.17      |      | C   |    |        |        |        |      |
| ATOM | 454        | O    | ASN | 35 | 9.927  | 4.276  | 31.467 | 1.00 |
|      | 27.01      |      | O   |    |        |        |        |      |
| ATOM | 455        | CB   | ASN | 35 | 8.668  | 6.094  | 33.713 | 1.00 |
|      | 54.51      |      | C   |    |        |        |        |      |
| ATOM | 456        | CG   | ASN | 35 | 7.979  | 6.211  | 35.068 | 1.00 |
|      | 80.73      |      | C   |    |        |        |        |      |
| ATOM | 457        | ND2  | ASN | 35 | 8.676  | 6.552  | 36.118 |      |
|      | 1.00220.46 |      |     |    |        |        |        | N    |
| ATOM | 458        | OD1  | ASN | 35 | 6.774  | 5.985  | 35.175 |      |
|      | 1.00117.80 |      |     |    |        |        |        | O    |
| ATOM | 459        | HN   | ASN | 35 | 9.360  | 3.486  | 34.024 | 1.00 |
|      | 51.15      |      | H   |    |        |        |        |      |
| ATOM | 460        | HA   | ASN | 35 | 7.078  | 4.963  | 32.831 | 1.00 |
|      | 47.21      |      | H   |    |        |        |        |      |
| ATOM | 461        | HB1  | ASN | 35 | 8.463  | 6.980  | 33.131 | 1.00 |
|      | 68.31      |      | H   |    |        |        |        |      |
| ATOM | 462        | HB2  | ASN | 35 | 9.734  | 5.998  | 33.858 | 1.00 |
|      | 57.75      |      | H   |    |        |        |        |      |
| ATOM | 463        | HD21 | ASN | 35 | 9.636  | 6.731  | 36.030 |      |
|      | 1.00405.39 |      |     |    |        |        |        | H    |
| ATOM | 464        | HD22 | ASN | 35 | 8.240  | 6.629  | 36.992 |      |
|      | 1.00245.64 |      |     |    |        |        |        | H    |
| ATOM | 465        | N    | PHE | 36 | 8.124  | 5.280  | 30.573 | 1.00 |
|      | 35.72      |      | N   |    |        |        |        |      |
| ATOM | 466        | CA   | PHE | 36 | 8.659  | 5.250  | 29.220 | 1.00 |
|      | 33.41      |      | C   |    |        |        |        |      |
| ATOM | 467        | C    | PHE | 36 | 9.816  | 6.233  | 29.073 | 1.00 |
|      | 28.51      |      | C   |    |        |        |        |      |

|            |     |     |     |    |        |       |        |      |
|------------|-----|-----|-----|----|--------|-------|--------|------|
| ATOM       | 468 | O   | PHE | 36 | 9.804  | 7.315 | 29.661 | 1.00 |
| 45.23      |     |     | O   |    |        |       |        |      |
| ATOM       | 469 | CB  | PHE | 36 | 7.553  | 5.603 | 28.230 | 1.00 |
| 67.53      |     |     | C   |    |        |       |        |      |
| ATOM       | 470 | CG  | PHE | 36 | 6.562  | 4.466 | 28.153 | 1.00 |
| 86.71      |     |     | C   |    |        |       |        |      |
| ATOM       | 471 | CD1 | PHE | 36 | 5.492  | 4.409 | 29.054 |      |
| 1.00106.51 |     |     | C   |    |        |       |        |      |
| ATOM       | 472 | CD2 | PHE | 36 | 6.713  | 3.469 | 27.182 | 1.00 |
| 99.48      |     |     | C   |    |        |       |        |      |
| ATOM       | 473 | CE1 | PHE | 36 | 4.573  | 3.355 | 28.983 |      |
| 1.00134.48 |     |     | C   |    |        |       |        |      |
| ATOM       | 474 | CE2 | PHE | 36 | 5.795  | 2.416 | 27.111 |      |
| 1.00134.27 |     |     | C   |    |        |       |        |      |
| ATOM       | 475 | CZ  | PHE | 36 | 4.723  | 2.359 | 28.012 |      |
| 1.00149.48 |     |     | C   |    |        |       |        |      |
| ATOM       | 476 | HN  | PHE | 36 | 7.240  | 5.668 | 30.728 | 1.00 |
| 62.87      |     |     | H   |    |        |       |        |      |
| ATOM       | 477 | HA  | PHE | 36 | 9.016  | 4.253 | 29.005 | 1.00 |
| 28.53      |     |     | H   |    |        |       |        |      |
| ATOM       | 478 | HB1 | PHE | 36 | 7.982  | 5.771 | 27.259 | 1.00 |
| 73.56      |     |     | H   |    |        |       |        |      |
| ATOM       | 479 | HB2 | PHE | 36 | 7.047  | 6.500 | 28.559 | 1.00 |
| 88.42      |     |     | H   |    |        |       |        |      |
| ATOM       | 480 | HD1 | PHE | 36 | 5.377  | 5.178 | 29.804 |      |
| 1.00110.20 |     |     | H   |    |        |       |        |      |
| ATOM       | 481 | HD2 | PHE | 36 | 7.540  | 3.512 | 26.487 | 1.00 |
| 93.07      |     |     | H   |    |        |       |        |      |
| ATOM       | 482 | HE1 | PHE | 36 | 3.747  | 3.312 | 29.678 |      |
| 1.00155.06 |     |     | H   |    |        |       |        |      |
| ATOM       | 483 | HE2 | PHE | 36 | 5.911  | 1.647 | 26.361 |      |
| 1.00159.46 |     |     | H   |    |        |       |        |      |
| ATOM       | 484 | HZ  | PHE | 36 | 4.015  | 1.546 | 27.956 |      |
| 1.00183.25 |     |     | H   |    |        |       |        |      |
| ATOM       | 485 | N   | THR | 37 | 10.816 | 5.848 | 28.282 | 1.00 |
| 20.06      |     |     | N   |    |        |       |        |      |
| ATOM       | 486 | CA  | THR | 37 | 11.983 | 6.694 | 28.054 | 1.00 |
| 27.18      |     |     | C   |    |        |       |        |      |
| ATOM       | 487 | C   | THR | 37 | 12.514 | 6.489 | 26.639 | 1.00 |
| 41.87      |     |     | C   |    |        |       |        |      |
| ATOM       | 488 | O   | THR | 37 | 12.944 | 5.394 | 26.278 |      |
| 1.00169.86 |     |     | O   |    |        |       |        |      |
| ATOM       | 489 | CB  | THR | 37 | 13.080 | 6.355 | 29.067 | 1.00 |
| 26.52      |     |     | C   |    |        |       |        |      |
| ATOM       | 490 | CG2 | THR | 37 | 12.550 | 6.571 | 30.485 | 1.00 |
| 75.69      |     |     | C   |    |        |       |        |      |
| ATOM       | 491 | OG1 | THR | 37 | 13.467 | 4.999 | 28.906 | 1.00 |
| 81.95      |     |     | O   |    |        |       |        |      |
| ATOM       | 492 | HN  | THR | 37 | 10.767 | 4.975 | 27.840 | 1.00 |
| 18.47      |     |     | H   |    |        |       |        |      |
| ATOM       | 493 | HA  | THR | 37 | 11.703 | 7.731 | 28.175 | 1.00 |
| 38.80      |     |     | H   |    |        |       |        |      |

|            |     |      |     |    |        |        |        |      |
|------------|-----|------|-----|----|--------|--------|--------|------|
| ATOM       | 494 | HB   | THR | 37 | 13.932 | 6.996  | 28.904 | 1.00 |
| 81.60      |     |      | H   |    |        |        |        |      |
| ATOM       | 495 | HG1  | THR | 37 | 14.358 | 4.901  | 29.251 |      |
| 1.00188.80 |     |      | H   |    |        |        |        |      |
| ATOM       | 496 | HG21 | THR | 37 | 13.376 | 6.580  | 31.181 |      |
| 1.00196.98 |     |      | H   |    |        |        |        |      |
| ATOM       | 497 | HG22 | THR | 37 | 11.871 | 5.771  | 30.742 |      |
| 1.00196.23 |     |      | H   |    |        |        |        |      |
| ATOM       | 498 | HG23 | THR | 37 | 12.027 | 7.515  | 30.535 |      |
| 1.00168.92 |     |      | H   |    |        |        |        |      |
| ATOM       | 499 | N    | GLU | 38 | 12.476 | 7.552  | 25.845 | 1.00 |
| 26.53      |     |      | N   |    |        |        |        |      |
| ATOM       | 500 | CA   | GLU | 38 | 12.951 | 7.487  | 24.465 | 1.00 |
| 30.29      |     |      | C   |    |        |        |        |      |
| ATOM       | 501 | C    | GLU | 38 | 14.469 | 7.623  | 24.403 | 1.00 |
| 25.39      |     |      | C   |    |        |        |        |      |
| ATOM       | 502 | O    | GLU | 38 | 15.102 | 8.096  | 25.347 | 1.00 |
| 51.60      |     |      | O   |    |        |        |        |      |
| ATOM       | 503 | CB   | GLU | 38 | 12.303 | 8.600  | 23.638 | 1.00 |
| 54.82      |     |      | C   |    |        |        |        |      |
| ATOM       | 504 | CG   | GLU | 38 | 10.804 | 8.330  | 23.504 |      |
| 1.00165.84 |     |      | C   |    |        |        |        |      |
| ATOM       | 505 | CD   | GLU | 38 | 10.137 | 9.458  | 22.724 |      |
| 1.00292.92 |     |      | C   |    |        |        |        |      |
| ATOM       | 506 | OE1  | GLU | 38 | 8.968  | 9.322  | 22.407 |      |
| 1.00414.19 |     |      | O   |    |        |        |        |      |
| ATOM       | 507 | OE2  | GLU | 38 | 10.807 | 10.443 | 22.457 |      |
| 1.00537.65 |     |      | O1- |    |        |        |        |      |
| ATOM       | 508 | HN   | GLU | 38 | 12.118 | 8.393  | 26.191 | 1.00 |
| 84.50      |     |      | H   |    |        |        |        |      |
| ATOM       | 509 | HA   | GLU | 38 | 12.669 | 6.535  | 24.042 | 1.00 |
| 32.15      |     |      | H   |    |        |        |        |      |
| ATOM       | 510 | HB1  | GLU | 38 | 12.752 | 8.626  | 22.656 |      |
| 1.00144.82 |     |      | H   |    |        |        |        |      |
| ATOM       | 511 | HB2  | GLU | 38 | 12.457 | 9.549  | 24.130 |      |
| 1.00106.49 |     |      | H   |    |        |        |        |      |
| ATOM       | 512 | HG1  | GLU | 38 | 10.362 | 8.265  | 24.487 |      |
| 1.00303.31 |     |      | H   |    |        |        |        |      |
| ATOM       | 513 | HG2  | GLU | 38 | 10.654 | 7.396  | 22.981 |      |
| 1.00323.99 |     |      | H   |    |        |        |        |      |
| ATOM       | 514 | N    | CYS | 39 | 15.043 | 7.207  | 23.278 | 1.00 |
| 15.84      |     |      | N   |    |        |        |        |      |
| ATOM       | 515 | CA   | CYS | 39 | 16.488 | 7.284  | 23.084 | 1.00 |
| 14.30      |     |      | C   |    |        |        |        |      |
| ATOM       | 516 | C    | CYS | 39 | 16.943 | 8.747  | 23.083 | 1.00 |
| 22.31      |     |      | C   |    |        |        |        |      |
| ATOM       | 517 | O    | CYS | 39 | 16.182 | 9.631  | 22.689 | 1.00 |
| 32.92      |     |      | O   |    |        |        |        |      |
| ATOM       | 518 | CB   | CYS | 39 | 16.853 | 6.629  | 21.749 | 1.00 |
| 18.08      |     |      | C   |    |        |        |        |      |
| ATOM       | 519 | SG   | CYS | 39 | 15.785 | 7.295  | 20.447 | 1.00 |
| 17.41      |     |      | S   |    |        |        |        |      |

|            |     |     |     |    |        |        |        |      |
|------------|-----|-----|-----|----|--------|--------|--------|------|
| ATOM       | 520 | HN  | CYS | 39 | 14.484 | 6.846  | 22.562 | 1.00 |
| 24.87      |     |     | H   |    |        |        |        |      |
| ATOM       | 521 | HA  | CYS | 39 | 16.975 | 6.747  | 23.881 | 1.00 |
| 14.60      |     |     | H   |    |        |        |        |      |
| ATOM       | 522 | HB1 | CYS | 39 | 16.714 | 5.561  | 21.818 | 1.00 |
| 27.71      |     |     | H   |    |        |        |        |      |
| ATOM       | 523 | HB2 | CYS | 39 | 17.884 | 6.843  | 21.511 | 1.00 |
| 34.91      |     |     | H   |    |        |        |        |      |
| ATOM       | 524 | N   | PRO | 40 | 18.154 | 9.030  | 23.509 | 1.00 |
| 27.27      |     |     | N   |    |        |        |        |      |
| ATOM       | 525 | CA  | PRO | 40 | 18.676 | 10.427 | 23.541 | 1.00 |
| 47.66      |     |     | C   |    |        |        |        |      |
| ATOM       | 526 | C   | PRO | 40 | 19.039 | 10.928 | 22.145 | 1.00 |
| 71.54      |     |     | C   |    |        |        |        |      |
| ATOM       | 527 | O   | PRO | 40 | 19.635 | 10.205 | 21.346 | 1.00 |
| 87.70      |     |     | O   |    |        |        |        |      |
| ATOM       | 528 | CB  | PRO | 40 | 19.915 | 10.321 | 24.438 | 1.00 |
| 53.85      |     |     | C   |    |        |        |        |      |
| ATOM       | 529 | CG  | PRO | 40 | 20.409 | 8.928  | 24.226 | 1.00 |
| 46.04      |     |     | C   |    |        |        |        |      |
| ATOM       | 530 | CD  | PRO | 40 | 19.159 | 8.070  | 24.001 | 1.00 |
| 25.70      |     |     | C   |    |        |        |        |      |
| ATOM       | 531 | HA  | PRO | 40 | 17.954 | 11.085 | 23.997 | 1.00 |
| 58.04      |     |     | H   |    |        |        |        |      |
| ATOM       | 532 | HB1 | PRO | 40 | 19.644 | 10.464 | 25.473 | 1.00 |
| 67.93      |     |     | H   |    |        |        |        |      |
| ATOM       | 533 | HB2 | PRO | 40 | 20.665 | 11.045 | 24.141 | 1.00 |
| 70.99      |     |     | H   |    |        |        |        |      |
| ATOM       | 534 | HG1 | PRO | 40 | 20.942 | 8.579  | 25.098 | 1.00 |
| 65.91      |     |     | H   |    |        |        |        |      |
| ATOM       | 535 | HG2 | PRO | 40 | 21.054 | 8.892  | 23.355 | 1.00 |
| 54.99      |     |     | H   |    |        |        |        |      |
| ATOM       | 536 | HD1 | PRO | 40 | 18.830 | 7.627  | 24.928 | 1.00 |
| 24.22      |     |     | H   |    |        |        |        |      |
| ATOM       | 537 | HD2 | PRO | 40 | 19.352 | 7.310  | 23.259 | 1.00 |
| 26.94      |     |     | H   |    |        |        |        |      |
| ATOM       | 538 | N   | GLY | 41 | 18.675 | 12.174 | 21.866 |      |
| 1.00105.24 |     |     | N   |    |        |        |        |      |
| ATOM       | 539 | CA  | GLY | 41 | 18.959 | 12.791 | 20.569 |      |
| 1.00147.55 |     |     | C   |    |        |        |        |      |
| ATOM       | 540 | C   | GLY | 41 | 20.150 | 13.737 | 20.669 |      |
| 1.00161.74 |     |     | C   |    |        |        |        |      |
| ATOM       | 541 | O   | GLY | 41 | 20.460 | 14.462 | 19.723 |      |
| 1.00244.37 |     |     | O   |    |        |        |        |      |
| ATOM       | 542 | HN  | GLY | 41 | 18.205 | 12.692 | 22.548 |      |
| 1.00121.79 |     |     | H   |    |        |        |        |      |
| ATOM       | 543 | HA1 | GLY | 41 | 18.094 | 13.350 | 20.247 |      |
| 1.00184.40 |     |     | H   |    |        |        |        |      |
| ATOM       | 544 | HA2 | GLY | 41 | 19.177 | 12.023 | 19.838 |      |
| 1.00157.34 |     |     | H   |    |        |        |        |      |
| ATOM       | 545 | N   | LEU | 42 | 20.812 | 13.732 | 21.826 |      |
| 1.00162.48 |     |     | N   |    |        |        |        |      |

|            |     |      |     |    |        |        |        |
|------------|-----|------|-----|----|--------|--------|--------|
| ATOM       | 546 | CA   | LEU | 42 | 21.970 | 14.600 | 22.055 |
| 1.00191.48 |     |      | C   |    |        |        |        |
| ATOM       | 547 | C    | LEU | 42 | 23.259 | 13.784 | 22.067 |
| 1.00166.66 |     |      | C   |    |        |        |        |
| ATOM       | 548 | O    | LEU | 42 | 23.271 | 12.629 | 22.492 |
| 1.00251.38 |     |      | O   |    |        |        |        |
| ATOM       | 549 | CB   | LEU | 42 | 21.815 | 15.321 | 23.395 |
| 1.00307.99 |     |      | C   |    |        |        |        |
| ATOM       | 550 | CG   | LEU | 42 | 20.438 | 15.991 | 23.467 |
| 1.00452.28 |     |      | C   |    |        |        |        |
| ATOM       | 551 | CD1  | LEU | 42 | 20.306 | 16.733 | 24.799 |
| 1.00681.24 |     |      | C   |    |        |        |        |
| ATOM       | 552 | CD2  | LEU | 42 | 20.274 | 16.981 | 22.303 |
| 1.00527.46 |     |      | C   |    |        |        |        |
| ATOM       | 553 | HN   | LEU | 42 | 20.514 | 13.135 | 22.544 |
| 1.00195.47 |     |      | H   |    |        |        |        |
| ATOM       | 554 | HA   | LEU | 42 | 22.035 | 15.338 | 21.268 |
| 1.00229.77 |     |      | H   |    |        |        |        |
| ATOM       | 555 | HB1  | LEU | 42 | 22.583 | 16.075 | 23.488 |
| 1.00342.49 |     |      | H   |    |        |        |        |
| ATOM       | 556 | HB2  | LEU | 42 | 21.910 | 14.607 | 24.200 |
| 1.00335.33 |     |      | H   |    |        |        |        |
| ATOM       | 557 | HG   | LEU | 42 | 19.670 | 15.233 | 23.405 |
| 1.00427.79 |     |      | H   |    |        |        |        |
| ATOM       | 558 | HD11 | LEU | 42 | 19.370 | 17.270 | 24.820 |
| 1.00909.71 |     |      | H   |    |        |        |        |
| ATOM       | 559 | HD12 | LEU | 42 | 21.124 | 17.430 | 24.905 |
| 1.00706.80 |     |      | H   |    |        |        |        |
| ATOM       | 560 | HD13 | LEU | 42 | 20.331 | 16.021 | 25.611 |
| 1.00858.82 |     |      | H   |    |        |        |        |
| ATOM       | 561 | HD21 | LEU | 42 | 19.500 | 17.696 | 22.540 |
| 1.00631.69 |     |      | H   |    |        |        |        |
| ATOM       | 562 | HD22 | LEU | 42 | 19.996 | 16.441 | 21.409 |
| 1.00628.06 |     |      | H   |    |        |        |        |
| ATOM       | 563 | HD23 | LEU | 42 | 21.206 | 17.502 | 22.134 |
| 1.00656.75 |     |      | H   |    |        |        |        |
| ATOM       | 564 | N    | THR | 43 | 24.345 | 14.399 | 21.597 |
| 1.00178.52 |     |      | N   |    |        |        |        |
| ATOM       | 565 | CA   | THR | 43 | 25.648 | 13.734 | 21.551 |
| 1.00240.84 |     |      | C   |    |        |        |        |
| ATOM       | 566 | C    | THR | 43 | 26.766 | 14.705 | 21.928 |
| 1.00372.31 |     |      | C   |    |        |        |        |
| ATOM       | 567 | O    | THR | 43 | 27.590 | 15.075 | 21.091 |
| 1.00500.13 |     |      | O   |    |        |        |        |
| ATOM       | 568 | CB   | THR | 43 | 25.895 | 13.177 | 20.153 |
| 1.00354.13 |     |      | C   |    |        |        |        |
| ATOM       | 569 | CG2  | THR | 43 | 25.579 | 14.241 | 19.097 |
| 1.00463.04 |     |      | C   |    |        |        |        |
| ATOM       | 570 | OG1  | THR | 43 | 27.249 | 12.765 | 20.040 |
| 1.00508.50 |     |      | O   |    |        |        |        |
| ATOM       | 571 | HN   | THR | 43 | 24.268 | 15.321 | 21.274 |
| 1.00229.59 |     |      | H   |    |        |        |        |

|            |     |      |     |    |        |        |        |
|------------|-----|------|-----|----|--------|--------|--------|
| ATOM       | 572 | HA   | THR | 43 | 25.654 | 12.908 | 22.247 |
| 1.00249.90 |     |      |     | H  |        |        |        |
| ATOM       | 573 | HB   | THR | 43 | 25.251 | 12.328 | 20.006 |
| 1.00481.58 |     |      |     | H  |        |        |        |
| ATOM       | 574 | HG1  | THR | 43 | 27.257 | 11.842 | 19.780 |
| 1.00624.31 |     |      |     | H  |        |        |        |
| ATOM       | 575 | HG21 | THR | 43 | 24.510 | 14.301 | 18.956 |
| 1.00650.95 |     |      |     | H  |        |        |        |
| ATOM       | 576 | HG22 | THR | 43 | 26.050 | 13.970 | 18.164 |
| 1.00580.73 |     |      |     | H  |        |        |        |
| ATOM       | 577 | HG23 | THR | 43 | 25.953 | 15.200 | 19.422 |
| 1.00571.99 |     |      |     | H  |        |        |        |
| ATOM       | 578 | N    | PRO | 44 | 26.805 | 15.116 | 23.167 |
| 1.00488.39 |     |      |     | N  |        |        |        |
| ATOM       | 579 | CA   | PRO | 44 | 27.841 | 16.063 | 23.674 |
| 1.00760.13 |     |      |     | C  |        |        |        |
| ATOM       | 580 | C    | PRO | 44 | 29.185 | 15.368 | 23.883 |
| 1.00735.36 |     |      |     | C  |        |        |        |
| ATOM       | 581 | O    | PRO | 44 | 30.199 | 16.019 | 24.140 |
| 1.00999.99 |     |      |     | O  |        |        |        |
| ATOM       | 582 | CB   | PRO | 44 | 27.248 | 16.554 | 24.999 |
| 1.00999.99 |     |      |     | C  |        |        |        |
| ATOM       | 583 | CG   | PRO | 44 | 26.420 | 15.408 | 25.486 |
| 1.00856.94 |     |      |     | C  |        |        |        |
| ATOM       | 584 | CD   | PRO | 44 | 25.866 | 14.719 | 24.232 |
| 1.00548.09 |     |      |     | C  |        |        |        |
| ATOM       | 585 | HA   | PRO | 44 | 27.953 | 16.893 | 22.996 |
| 1.00939.00 |     |      |     | H  |        |        |        |
| ATOM       | 586 | HB1  | PRO | 44 | 26.621 | 17.418 | 24.833 |
| 1.00999.99 |     |      |     | H  |        |        |        |
| ATOM       | 587 | HB2  | PRO | 44 | 28.035 | 16.789 | 25.706 |
| 1.00999.99 |     |      |     | H  |        |        |        |
| ATOM       | 588 | HG1  | PRO | 44 | 25.604 | 15.765 | 26.098 |
| 1.00999.99 |     |      |     | H  |        |        |        |
| ATOM       | 589 | HG2  | PRO | 44 | 27.036 | 14.719 | 26.052 |
| 1.00853.53 |     |      |     | H  |        |        |        |
| ATOM       | 590 | HD1  | PRO | 44 | 24.873 | 15.075 | 24.004 |
| 1.00602.45 |     |      |     | H  |        |        |        |
| ATOM       | 591 | HD2  | PRO | 44 | 25.867 | 13.644 | 24.357 |
| 1.00463.32 |     |      |     | H  |        |        |        |
| ATOM       | 592 | N    | ILE | 45 | 29.179 | 14.043 | 23.780 |
| 1.00518.33 |     |      |     | N  |        |        |        |
| ATOM       | 593 | CA   | ILE | 45 | 30.398 | 13.268 | 23.967 |
| 1.00582.79 |     |      |     | C  |        |        |        |
| ATOM       | 594 | C    | ILE | 45 | 31.375 | 13.518 | 22.822 |
| 1.00795.93 |     |      |     | C  |        |        |        |
| ATOM       | 595 | O    | ILE | 45 | 31.013 | 13.414 | 21.651 |
| 1.00898.75 |     |      |     | O  |        |        |        |
| ATOM       | 596 | CB   | ILE | 45 | 30.062 | 11.778 | 24.033 |
| 1.00474.41 |     |      |     | C  |        |        |        |
| ATOM       | 597 | CG1  | ILE | 45 | 29.167 | 11.512 | 25.247 |
| 1.00516.90 |     |      |     | C  |        |        |        |



|            |     |      |     |    |        |        |        |
|------------|-----|------|-----|----|--------|--------|--------|
| ATOM       | 598 | CG2  | ILE | 45 | 31.354 | 10.968 | 24.166 |
| 1.00760.75 |     |      | C   |    |        |        |        |
| ATOM       | 599 | CD1  | ILE | 45 | 28.616 | 10.086 | 25.174 |
| 1.00566.81 |     |      | C   |    |        |        |        |
| ATOM       | 600 | HN   | ILE | 45 | 28.339 | 13.581 | 23.579 |
| 1.00395.72 |     |      | H   |    |        |        |        |
| ATOM       | 601 | HA   | ILE | 45 | 30.859 | 13.563 | 24.896 |
| 1.00711.06 |     |      | H   |    |        |        |        |
| ATOM       | 602 | HB   | ILE | 45 | 29.544 | 11.484 | 23.132 |
| 1.00477.81 |     |      | H   |    |        |        |        |
| ATOM       | 603 | HG11 | ILE | 45 | 28.346 | 12.213 | 25.250 |
| 1.00624.28 |     |      | H   |    |        |        |        |
| ATOM       | 604 | HG12 | ILE | 45 | 29.745 | 11.629 | 26.153 |
| 1.00744.84 |     |      | H   |    |        |        |        |
| ATOM       | 605 | HG21 | ILE | 45 | 31.969 | 11.399 | 24.942 |
| 1.00920.57 |     |      | H   |    |        |        |        |
| ATOM       | 606 | HG22 | ILE | 45 | 31.889 | 10.990 | 23.229 |
| 1.00999.99 |     |      | H   |    |        |        |        |
| ATOM       | 607 | HG23 | ILE | 45 | 31.114 | 9.947  | 24.422 |
| 1.00865.46 |     |      | H   |    |        |        |        |
| ATOM       | 608 | HD11 | ILE | 45 | 27.879 | 9.944  | 25.951 |
| 1.00658.89 |     |      | H   |    |        |        |        |
| ATOM       | 609 | HD12 | ILE | 45 | 29.423 | 9.381  | 25.309 |
| 1.00734.30 |     |      | H   |    |        |        |        |
| ATOM       | 610 | HD13 | ILE | 45 | 28.157 | 9.927  | 24.209 |
| 1.00675.84 |     |      | H   |    |        |        |        |
| ATOM       | 611 | N    | ALA | 46 | 32.614 | 13.849 | 23.170 |
| 1.00999.99 |     |      | N   |    |        |        |        |
| ATOM       | 612 | CA   | ALA | 46 | 33.636 | 14.113 | 22.164 |
| 1.00999.99 |     |      | C   |    |        |        |        |
| ATOM       | 613 | C    | ALA | 46 | 35.023 | 14.126 | 22.798 |
| 1.00999.99 |     |      | C   |    |        |        |        |
| ATOM       | 614 | CB   | ALA | 46 | 33.369 | 15.459 | 21.487 |
| 1.00999.99 |     |      | C   |    |        |        |        |
| ATOM       | 615 | OT1  | ALA | 46 | 35.098 | 14.266 | 24.008 |
| 1.00999.99 |     |      | O   |    |        |        |        |
| ATOM       | 616 | OT2  | ALA | 46 | 35.990 | 13.997 | 22.065 |
| 1.00999.99 |     |      | O   |    |        |        |        |
| ATOM       | 617 | HN   | ALA | 46 | 32.845 | 13.918 | 24.120 |
| 1.00999.99 |     |      | H   |    |        |        |        |
| ATOM       | 618 | HA   | ALA | 46 | 33.600 | 13.334 | 21.416 |
| 1.00999.99 |     |      | H   |    |        |        |        |
| ATOM       | 619 | HB1  | ALA | 46 | 33.655 | 16.259 | 22.153 |
| 1.00999.99 |     |      | H   |    |        |        |        |
| ATOM       | 620 | HB2  | ALA | 46 | 32.318 | 15.542 | 21.254 |
| 1.00999.99 |     |      | H   |    |        |        |        |
| ATOM       | 621 | HB3  | ALA | 46 | 33.946 | 15.524 | 20.575 |
| 1.00999.99 |     |      | H   |    |        |        |        |
| ENDMDL     |     |      |     |    |        |        |        |
| TER        |     |      |     |    |        |        |        |
| MODEL      | 2   |      |     |    |        |        |        |
| ATOM       | 1   | N    | GLY | 1  | 23.748 | -0.455 | 11.093 |

|            |    |      |     |   |   |        |        |        |
|------------|----|------|-----|---|---|--------|--------|--------|
| 1.00999.99 |    |      |     | N |   |        |        |        |
| ATOM       | 2  | CA   | GLY |   | 1 | 24.412 | -0.156 | 12.392 |
| 1.00999.99 |    |      |     | C |   |        |        |        |
| ATOM       | 3  | C    | GLY |   | 1 | 23.820 | -1.040 | 13.483 |
| 1.00999.99 |    |      |     | C |   |        |        |        |
| ATOM       | 4  | O    | GLY |   | 1 | 23.080 | -1.983 | 13.199 |
| 1.00999.99 |    |      |     | O |   |        |        |        |
| ATOM       | 5  | HA1  | GLY |   | 1 | 24.255 | 0.880  | 12.648 |
| 1.00999.99 |    |      |     | H |   |        |        |        |
| ATOM       | 6  | HA2  | GLY |   | 1 | 25.473 | -0.349 | 12.306 |
| 1.00999.99 |    |      |     | H |   |        |        |        |
| ATOM       | 7  | HT1  | GLY |   | 1 | 23.780 | -1.478 | 10.913 |
| 1.00999.99 |    |      |     | H |   |        |        |        |
| ATOM       | 8  | HT2  | GLY |   | 1 | 24.242 | 0.047  | 10.327 |
| 1.00999.99 |    |      |     | H |   |        |        |        |
| ATOM       | 9  | HT3  | GLY |   | 1 | 22.757 | -0.143 | 11.129 |
| 1.00999.99 |    |      |     | H |   |        |        |        |
| ATOM       | 10 | N    | LEU |   | 2 | 24.149 | -0.731 | 14.734 |
| 1.00999.99 |    |      |     | N |   |        |        |        |
| ATOM       | 11 | CA   | LEU |   | 2 | 23.645 | -1.505 | 15.861 |
| 1.00895.59 |    |      |     | C |   |        |        |        |
| ATOM       | 12 | C    | LEU |   | 2 | 22.125 | -1.408 | 15.940 |
| 1.00532.27 |    |      |     | C |   |        |        |        |
| ATOM       | 13 | O    | LEU |   | 2 | 21.447 | -2.390 | 16.238 |
| 1.00625.21 |    |      |     | O |   |        |        |        |
| ATOM       | 14 | CB   | LEU |   | 2 | 24.266 | -0.999 | 17.168 |
| 1.00999.99 |    |      |     | C |   |        |        |        |
| ATOM       | 15 | CG   | LEU |   | 2 | 25.721 | -1.469 | 17.269 |
| 1.00999.99 |    |      |     | C |   |        |        |        |
| ATOM       | 16 | CD1  | LEU |   | 2 | 26.550 | -0.865 | 16.129 |
| 1.00999.99 |    |      |     | C |   |        |        |        |
| ATOM       | 17 | CD2  | LEU |   | 2 | 26.299 | -1.025 | 18.616 |
| 1.00999.99 |    |      |     | C |   |        |        |        |
| ATOM       | 18 | HN   | LEU |   | 2 | 24.743 | 0.032  | 14.899 |
| 1.00999.99 |    |      |     | H |   |        |        |        |
| ATOM       | 19 | HA   | LEU |   | 2 | 23.918 | -2.536 | 15.723 |
| 1.00890.87 |    |      |     | H |   |        |        |        |
| ATOM       | 20 | HB1  | LEU |   | 2 | 23.706 | -1.388 | 18.006 |
| 1.00924.07 |    |      |     | H |   |        |        |        |
| ATOM       | 21 | HB2  | LEU |   | 2 | 24.235 | 0.081  | 17.186 |
| 1.00999.99 |    |      |     | H |   |        |        |        |
| ATOM       | 22 | HG   | LEU |   | 2 | 25.754 | -2.548 | 17.202 |
| 1.00999.99 |    |      |     | H |   |        |        |        |
| ATOM       | 23 | HD11 | LEU |   | 2 | 26.384 | -1.428 | 15.224 |
| 1.00999.99 |    |      |     | H |   |        |        |        |
| ATOM       | 24 | HD12 | LEU |   | 2 | 27.600 | -0.900 | 16.385 |
| 1.00999.99 |    |      |     | H |   |        |        |        |
| ATOM       | 25 | HD13 | LEU |   | 2 | 26.255 | 0.163  | 15.972 |
| 1.00999.99 |    |      |     | H |   |        |        |        |
| ATOM       | 26 | HD21 | LEU |   | 2 | 26.458 | 0.042  | 18.604 |
| 1.00999.99 |    |      |     | H |   |        |        |        |
| ATOM       | 27 | HD22 | LEU |   | 2 | 27.239 | -1.529 | 18.788 |



|            |    |      |     |   |        |        |        |      |     |
|------------|----|------|-----|---|--------|--------|--------|------|-----|
| 74.72      |    |      | O   |   |        |        |        |      |     |
| ATOM       | 54 | CB   | GLU | 5 | 13.994 | -0.459 | 13.312 | 1.00 |     |
| 49.24      |    |      | C   |   |        |        |        |      |     |
| ATOM       | 55 | CG   | GLU | 5 | 13.737 | -1.149 | 14.645 | 1.00 |     |
| 55.48      |    |      | C   |   |        |        |        |      |     |
| ATOM       | 56 | CD   | GLU | 5 | 12.526 | -2.071 | 14.533 | 1.00 |     |
| 92.06      |    |      | C   |   |        |        |        |      |     |
| ATOM       | 57 | OE1  | GLU | 5 | 11.950 | -2.133 | 13.459 |      |     |
| 1.00206.49 |    |      |     |   |        |        |        |      | O   |
| ATOM       | 58 | OE2  | GLU | 5 | 12.194 | -2.702 | 15.523 |      |     |
| 1.00197.24 |    |      |     |   |        |        |        |      | O1- |
| ATOM       | 59 | HN   | GLU | 5 | 16.533 | -0.868 | 14.679 | 1.00 |     |
| 45.52      |    |      | H   |   |        |        |        |      |     |
| ATOM       | 60 | HA   | GLU | 5 | 15.536 | 0.706  | 12.420 | 1.00 |     |
| 60.63      |    |      | H   |   |        |        |        |      |     |
| ATOM       | 61 | HB1  | GLU | 5 | 14.029 | -1.198 | 12.526 | 1.00 |     |
| 61.59      |    |      | H   |   |        |        |        |      |     |
| ATOM       | 62 | HB2  | GLU | 5 | 13.205 | 0.242  | 13.111 | 1.00 |     |
| 63.66      |    |      | H   |   |        |        |        |      |     |
| ATOM       | 63 | HG1  | GLU | 5 | 13.550 | -0.404 | 15.405 | 1.00 |     |
| 58.03      |    |      | H   |   |        |        |        |      |     |
| ATOM       | 64 | HG2  | GLU | 5 | 14.607 | -1.723 | 14.911 | 1.00 |     |
| 57.77      |    |      | H   |   |        |        |        |      |     |
| ATOM       | 65 | N    | ASN | 6 | 14.153 | 2.143  | 14.404 | 1.00 |     |
| 50.73      |    |      | N   |   |        |        |        |      |     |
| ATOM       | 66 | CA   | ASN | 6 | 13.982 | 3.236  | 15.353 | 1.00 |     |
| 71.04      |    |      | C   |   |        |        |        |      |     |
| ATOM       | 67 | C    | ASN | 6 | 14.023 | 2.704  | 16.781 | 1.00 |     |
| 65.17      |    |      | C   |   |        |        |        |      |     |
| ATOM       | 68 | O    | ASN | 6 | 14.600 | 3.328  | 17.671 | 1.00 |     |
| 94.86      |    |      | O   |   |        |        |        |      |     |
| ATOM       | 69 | CB   | ASN | 6 | 12.648 | 3.942  | 15.106 | 1.00 |     |
| 94.83      |    |      | C   |   |        |        |        |      |     |
| ATOM       | 70 | CG   | ASN | 6 | 12.715 | 4.743  | 13.809 |      |     |
| 1.00160.94 |    |      |     |   |        |        |        |      | C   |
| ATOM       | 71 | ND2  | ASN | 6 | 11.609 | 5.086  | 13.208 |      |     |
| 1.00244.88 |    |      |     |   |        |        |        |      | N   |
| ATOM       | 72 | OD1  | ASN | 6 | 13.802 | 5.063  | 13.331 |      |     |
| 1.00219.73 |    |      |     |   |        |        |        |      | O   |
| ATOM       | 73 | HN   | ASN | 6 | 13.448 | 1.955  | 13.750 | 1.00 |     |
| 72.81      |    |      | H   |   |        |        |        |      |     |
| ATOM       | 74 | HA   | ASN | 6 | 14.784 | 3.946  | 15.220 | 1.00 |     |
| 96.02      |    |      | H   |   |        |        |        |      |     |
| ATOM       | 75 | HB1  | ASN | 6 | 12.439 | 4.612  | 15.927 |      |     |
| 1.00111.09 |    |      |     |   |        |        |        |      | H   |
| ATOM       | 76 | HB2  | ASN | 6 | 11.861 | 3.207  | 15.033 | 1.00 |     |
| 98.13      |    |      | H   |   |        |        |        |      |     |
| ATOM       | 77 | HD21 | ASN | 6 | 10.742 | 4.830  | 13.590 |      |     |
| 1.00272.43 |    |      |     |   |        |        |        |      | H   |
| ATOM       | 78 | HD22 | ASN | 6 | 11.643 | 5.600  | 12.375 |      |     |
| 1.00336.78 |    |      |     |   |        |        |        |      | H   |
| ATOM       | 79 | N    | GLY | 7 | 13.410 | 1.538  | 16.989 | 1.00 |     |

|            |     |     |     |   |        |        |        |      |     |
|------------|-----|-----|-----|---|--------|--------|--------|------|-----|
| 51.80      |     |     | N   |   |        |        |        |      |     |
| ATOM       | 80  | CA  | GLY | 7 | 13.378 | 0.908  | 18.313 | 1.00 |     |
| 71.47      |     |     | C   |   |        |        |        |      |     |
| ATOM       | 81  | C   | GLY | 7 | 13.973 | -0.493 | 18.255 | 1.00 |     |
| 41.04      |     |     | C   |   |        |        |        |      |     |
| ATOM       | 82  | O   | GLY | 7 | 13.280 | -1.485 | 18.468 | 1.00 |     |
| 44.54      |     |     | O   |   |        |        |        |      |     |
| ATOM       | 83  | HN  | GLY | 7 | 12.972 | 1.090  | 16.237 | 1.00 |     |
| 45.49      |     |     | H   |   |        |        |        |      |     |
| ATOM       | 84  | HA1 | GLY | 7 | 12.360 | 0.838  | 18.646 |      |     |
| 1.00103.52 |     |     |     |   |        |        |        |      | H   |
| ATOM       | 85  | HA2 | GLY | 7 | 13.943 | 1.504  | 19.018 |      |     |
| 1.00108.67 |     |     |     |   |        |        |        |      | H   |
| ATOM       | 86  | N   | ASP | 8 | 15.265 | -0.559 | 17.961 | 1.00 |     |
| 27.00      |     |     | N   |   |        |        |        |      |     |
| ATOM       | 87  | CA  | ASP | 8 | 15.955 | -1.842 | 17.872 | 1.00 |     |
| 14.15      |     |     | C   |   |        |        |        |      |     |
| ATOM       | 88  | C   | ASP | 8 | 15.900 | -2.573 | 19.206 | 1.00 |     |
| 9.37       |     |     | C   |   |        |        |        |      |     |
| ATOM       | 89  | O   | ASP | 8 | 15.681 | -3.783 | 19.254 | 1.00 |     |
| 14.61      |     |     | O   |   |        |        |        |      |     |
| ATOM       | 90  | CB  | ASP | 8 | 17.413 | -1.627 | 17.465 | 1.00 |     |
| 15.06      |     |     | C   |   |        |        |        |      |     |
| ATOM       | 91  | CG  | ASP | 8 | 18.096 | -2.975 | 17.256 | 1.00 |     |
| 21.22      |     |     | C   |   |        |        |        |      |     |
| ATOM       | 92  | OD1 | ASP | 8 | 17.493 | -3.981 | 17.588 |      |     |
| 1.00119.56 |     |     |     |   |        |        |        |      | O   |
| ATOM       | 93  | OD2 | ASP | 8 | 19.214 | -2.980 | 16.766 |      |     |
| 1.00133.27 |     |     |     |   |        |        |        |      | O1- |
| ATOM       | 94  | HN  | ASP | 8 | 15.760 | 0.269  | 17.801 | 1.00 |     |
| 35.63      |     |     | H   |   |        |        |        |      |     |
| ATOM       | 95  | HA  | ASP | 8 | 15.471 | -2.445 | 17.125 | 1.00 |     |
| 20.92      |     |     | H   |   |        |        |        |      |     |
| ATOM       | 96  | HB1 | ASP | 8 | 17.926 | -1.085 | 18.244 | 1.00 |     |
| 29.39      |     |     | H   |   |        |        |        |      |     |
| ATOM       | 97  | HB2 | ASP | 8 | 17.450 | -1.059 | 16.547 | 1.00 |     |
| 44.14      |     |     | H   |   |        |        |        |      |     |
| ATOM       | 98  | N   | CYS | 9 | 16.095 | -1.830 | 20.288 | 1.00 |     |
| 5.93       |     |     | N   |   |        |        |        |      |     |
| ATOM       | 99  | CA  | CYS | 9 | 16.059 | -2.418 | 21.620 | 1.00 |     |
| 7.54       |     |     | C   |   |        |        |        |      |     |
| ATOM       | 100 | C   | CYS | 9 | 14.685 | -3.020 | 21.892 | 1.00 |     |
| 14.60      |     |     | C   |   |        |        |        |      |     |
| ATOM       | 101 | O   | CYS | 9 | 14.567 | -4.108 | 22.454 | 1.00 |     |
| 25.78      |     |     | O   |   |        |        |        |      |     |
| ATOM       | 102 | CB  | CYS | 9 | 16.382 | -1.359 | 22.665 | 1.00 |     |
| 6.63       |     |     | C   |   |        |        |        |      |     |
| ATOM       | 103 | SG  | CYS | 9 | 18.135 | -0.958 | 22.541 | 1.00 |     |
| 10.91      |     |     | S   |   |        |        |        |      |     |
| ATOM       | 104 | HN  | CYS | 9 | 16.259 | -0.870 | 20.186 | 1.00 |     |
| 6.51       |     |     | H   |   |        |        |        |      |     |
| ATOM       | 105 | HA  | CYS | 9 | 16.808 | -3.190 | 21.678 | 1.00 |     |

|            |     |     |     |    |        |        |        |      |
|------------|-----|-----|-----|----|--------|--------|--------|------|
| 11.12      |     |     | H   |    |        |        |        |      |
| ATOM       | 106 | HB1 | CYS | 9  | 16.171 | -1.737 | 23.652 | 1.00 |
| 11.28      |     |     | H   |    |        |        |        |      |
| ATOM       | 107 | HB2 | CYS | 9  | 15.792 | -0.473 | 22.481 | 1.00 |
| 5.04       |     |     | H   |    |        |        |        |      |
| ATOM       | 108 | N   | ALA | 10 | 13.653 | -2.300 | 21.472 | 1.00 |
| 16.26      |     |     | N   |    |        |        |        |      |
| ATOM       | 109 | CA  | ALA | 10 | 12.279 | -2.756 | 21.649 | 1.00 |
| 32.04      |     |     | C   |    |        |        |        |      |
| ATOM       | 110 | C   | ALA | 10 | 11.332 | -1.896 | 20.812 | 1.00 |
| 45.47      |     |     | C   |    |        |        |        |      |
| ATOM       | 111 | O   | ALA | 10 | 11.719 | -0.840 | 20.315 |      |
| 1.00119.04 |     |     | O   |    |        |        |        |      |
| ATOM       | 112 | CB  | ALA | 10 | 11.883 | -2.690 | 23.131 | 1.00 |
| 30.10      |     |     | C   |    |        |        |        |      |
| ATOM       | 113 | HN  | ALA | 10 | 13.819 | -1.446 | 21.022 | 1.00 |
| 12.81      |     |     | H   |    |        |        |        |      |
| ATOM       | 114 | HA  | ALA | 10 | 12.208 | -3.779 | 21.313 | 1.00 |
| 47.14      |     |     | H   |    |        |        |        |      |
| ATOM       | 115 | HB1 | ALA | 10 | 12.743 | -2.921 | 23.741 | 1.00 |
| 84.37      |     |     | H   |    |        |        |        |      |
| ATOM       | 116 | HB2 | ALA | 10 | 11.100 | -3.409 | 23.327 |      |
| 1.00118.20 |     |     | H   |    |        |        |        |      |
| ATOM       | 117 | HB3 | ALA | 10 | 11.527 | -1.701 | 23.371 |      |
| 1.00117.32 |     |     | H   |    |        |        |        |      |
| ATOM       | 118 | N   | ALA | 11 | 10.098 | -2.359 | 20.653 | 1.00 |
| 30.62      |     |     | N   |    |        |        |        |      |
| ATOM       | 119 | CA  | ALA | 11 | 9.116  | -1.619 | 19.866 | 1.00 |
| 35.24      |     |     | C   |    |        |        |        |      |
| ATOM       | 120 | C   | ALA | 11 | 8.862  | -0.238 | 20.469 | 1.00 |
| 22.78      |     |     | C   |    |        |        |        |      |
| ATOM       | 121 | O   | ALA | 11 | 8.748  | 0.751  | 19.745 | 1.00 |
| 53.33      |     |     | O   |    |        |        |        |      |
| ATOM       | 122 | CB  | ALA | 11 | 7.803  | -2.400 | 19.806 | 1.00 |
| 60.49      |     |     | C   |    |        |        |        |      |
| ATOM       | 123 | HN  | ALA | 11 | 9.843  | -3.209 | 21.067 | 1.00 |
| 50.37      |     |     | H   |    |        |        |        |      |
| ATOM       | 124 | HA  | ALA | 11 | 9.493  | -1.497 | 18.862 | 1.00 |
| 41.70      |     |     | H   |    |        |        |        |      |
| ATOM       | 125 | HB1 | ALA | 11 | 7.979  | -3.367 | 19.359 |      |
| 1.00157.06 |     |     | H   |    |        |        |        |      |
| ATOM       | 126 | HB2 | ALA | 11 | 7.086  | -1.854 | 19.211 |      |
| 1.00148.83 |     |     | H   |    |        |        |        |      |
| ATOM       | 127 | HB3 | ALA | 11 | 7.415  | -2.530 | 20.807 |      |
| 1.00137.06 |     |     | H   |    |        |        |        |      |
| ATOM       | 128 | N   | ASP | 12 | 8.769  | -0.179 | 21.795 | 1.00 |
| 18.98      |     |     | N   |    |        |        |        |      |
| ATOM       | 129 | CA  | ASP | 12 | 8.521  | 1.089  | 22.482 | 1.00 |
| 31.05      |     |     | C   |    |        |        |        |      |
| ATOM       | 130 | C   | ASP | 12 | 9.824  | 1.846  | 22.723 | 1.00 |
| 22.98      |     |     | C   |    |        |        |        |      |
| ATOM       | 131 | O   | ASP | 12 | 9.837  | 3.076  | 22.773 | 1.00 |

|            |     |     |     |    |        |        |        |      |  |
|------------|-----|-----|-----|----|--------|--------|--------|------|--|
| 37.14      |     |     | O   |    |        |        |        |      |  |
| ATOM       | 132 | CB  | ASP | 12 | 7.832  | 0.823  | 23.821 | 1.00 |  |
| 48.35      |     |     | C   |    |        |        |        |      |  |
| ATOM       | 133 | CG  | ASP | 12 | 6.417  | 0.303  | 23.586 |      |  |
| 1.00104.83 |     |     | C   |    |        |        |        |      |  |
| ATOM       | 134 | OD1 | ASP | 12 | 5.935  | 0.439  | 22.474 |      |  |
| 1.00258.73 |     |     | O   |    |        |        |        |      |  |
| ATOM       | 135 | OD2 | ASP | 12 | 5.837  | -0.223 | 24.521 |      |  |
| 1.00213.46 |     |     | O1- |    |        |        |        |      |  |
| ATOM       | 136 | HN  | ASP | 12 | 8.864  | -1.001 | 22.320 | 1.00 |  |
| 36.19      |     |     | H   |    |        |        |        |      |  |
| ATOM       | 137 | HA  | ASP | 12 | 7.870  | 1.699  | 21.875 | 1.00 |  |
| 49.76      |     |     | H   |    |        |        |        |      |  |
| ATOM       | 138 | HB1 | ASP | 12 | 7.784  | 1.741  | 24.388 | 1.00 |  |
| 95.71      |     |     | H   |    |        |        |        |      |  |
| ATOM       | 139 | HB2 | ASP | 12 | 8.396  | 0.088  | 24.376 | 1.00 |  |
| 54.37      |     |     | H   |    |        |        |        |      |  |
| ATOM       | 140 | N   | GLU | 13 | 10.918 | 1.106  | 22.878 | 1.00 |  |
| 17.60      |     |     | N   |    |        |        |        |      |  |
| ATOM       | 141 | CA  | GLU | 13 | 12.221 | 1.723  | 23.121 | 1.00 |  |
| 12.01      |     |     | C   |    |        |        |        |      |  |
| ATOM       | 142 | C   | GLU | 13 | 12.796 | 2.317  | 21.839 | 1.00 |  |
| 10.07      |     |     | C   |    |        |        |        |      |  |
| ATOM       | 143 | O   | GLU | 13 | 12.395 | 1.949  | 20.735 | 1.00 |  |
| 12.81      |     |     | O   |    |        |        |        |      |  |
| ATOM       | 144 | CB  | GLU | 13 | 13.190 | 0.686  | 23.687 | 1.00 |  |
| 11.74      |     |     | C   |    |        |        |        |      |  |
| ATOM       | 145 | CG  | GLU | 13 | 12.697 | 0.221  | 25.059 | 1.00 |  |
| 13.49      |     |     | C   |    |        |        |        |      |  |
| ATOM       | 146 | CD  | GLU | 13 | 12.862 | 1.343  | 26.078 |      |  |
| 1.00142.36 |     |     | C   |    |        |        |        |      |  |
| ATOM       | 147 | OE1 | GLU | 13 | 13.575 | 2.285  | 25.780 |      |  |
| 1.00339.06 |     |     | O   |    |        |        |        |      |  |
| ATOM       | 148 | OE2 | GLU | 13 | 12.272 | 1.243  | 27.140 |      |  |
| 1.00335.28 |     |     | O1- |    |        |        |        |      |  |
| ATOM       | 149 | HN  | GLU | 13 | 10.849 | 0.130  | 22.833 | 1.00 |  |
| 28.36      |     |     | H   |    |        |        |        |      |  |
| ATOM       | 150 | HA  | GLU | 13 | 12.100 | 2.511  | 23.847 | 1.00 |  |
| 13.06      |     |     | H   |    |        |        |        |      |  |
| ATOM       | 151 | HB1 | GLU | 13 | 14.169 | 1.128  | 23.788 | 1.00 |  |
| 13.76      |     |     | H   |    |        |        |        |      |  |
| ATOM       | 152 | HB2 | GLU | 13 | 13.245 | -0.159 | 23.016 | 1.00 |  |
| 9.94       |     |     | H   |    |        |        |        |      |  |
| ATOM       | 153 | HG1 | GLU | 13 | 13.269 | -0.636 | 25.376 | 1.00 |  |
| 66.02      |     |     | H   |    |        |        |        |      |  |
| ATOM       | 154 | HG2 | GLU | 13 | 11.652 | -0.047 | 24.993 | 1.00 |  |
| 56.23      |     |     | H   |    |        |        |        |      |  |
| ATOM       | 155 | N   | CYS | 14 | 13.745 | 3.243  | 21.999 | 1.00 |  |
| 9.12       |     |     | N   |    |        |        |        |      |  |
| ATOM       | 156 | CA  | CYS | 14 | 14.390 | 3.901  | 20.860 | 1.00 |  |
| 10.69      |     |     | C   |    |        |        |        |      |  |
| ATOM       | 157 | C   | CYS | 14 | 15.838 | 3.440  | 20.731 | 1.00 |  |

|            |     |     |     |    |        |       |        |      |
|------------|-----|-----|-----|----|--------|-------|--------|------|
| 9.56       |     |     | C   |    |        |       |        |      |
| ATOM       | 158 | O   | CYS | 14 | 16.458 | 3.050 | 21.717 | 1.00 |
| 13.62      |     |     | O   |    |        |       |        |      |
| ATOM       | 159 | CB  | CYS | 14 | 14.360 | 5.420 | 21.050 | 1.00 |
| 13.96      |     |     | C   |    |        |       |        |      |
| ATOM       | 160 | SG  | CYS | 14 | 15.319 | 6.212 | 19.733 | 1.00 |
| 42.96      |     |     | S   |    |        |       |        |      |
| ATOM       | 161 | HN  | CYS | 14 | 14.020 | 3.490 | 22.908 | 1.00 |
| 9.76       |     |     | H   |    |        |       |        |      |
| ATOM       | 162 | HA  | CYS | 14 | 13.861 | 3.655 | 19.949 | 1.00 |
| 15.54      |     |     | H   |    |        |       |        |      |
| ATOM       | 163 | HB1 | CYS | 14 | 14.788 | 5.669 | 22.008 | 1.00 |
| 50.72      |     |     | H   |    |        |       |        |      |
| ATOM       | 164 | HB2 | CYS | 14 | 13.338 | 5.767 | 21.011 | 1.00 |
| 46.13      |     |     | H   |    |        |       |        |      |
| ATOM       | 165 | N   | CYS | 15 | 16.370 | 3.490 | 19.511 | 1.00 |
| 9.60       |     |     | N   |    |        |       |        |      |
| ATOM       | 166 | CA  | CYS | 15 | 17.751 | 3.080 | 19.260 | 1.00 |
| 9.28       |     |     | C   |    |        |       |        |      |
| ATOM       | 167 | C   | CYS | 15 | 18.350 | 3.970 | 18.182 | 1.00 |
| 9.92       |     |     | C   |    |        |       |        |      |
| ATOM       | 168 | O   | CYS | 15 | 17.771 | 4.126 | 17.107 | 1.00 |
| 13.31      |     |     | O   |    |        |       |        |      |
| ATOM       | 169 | CB  | CYS | 15 | 17.793 | 1.619 | 18.799 | 1.00 |
| 12.90      |     |     | C   |    |        |       |        |      |
| ATOM       | 170 | SG  | CYS | 15 | 19.499 | 1.006 | 18.848 | 1.00 |
| 39.11      |     |     | S   |    |        |       |        |      |
| ATOM       | 171 | HN  | CYS | 15 | 15.825 | 3.816 | 18.764 | 1.00 |
| 13.12      |     |     | H   |    |        |       |        |      |
| ATOM       | 172 | HA  | CYS | 15 | 18.331 | 3.182 | 20.166 | 1.00 |
| 8.26       |     |     | H   |    |        |       |        |      |
| ATOM       | 173 | HB1 | CYS | 15 | 17.418 | 1.554 | 17.788 | 1.00 |
| 24.82      |     |     | H   |    |        |       |        |      |
| ATOM       | 174 | HB2 | CYS | 15 | 17.178 | 1.020 | 19.450 | 1.00 |
| 27.31      |     |     | H   |    |        |       |        |      |
| ATOM       | 175 | N   | VAL | 16 | 19.505 | 4.562 | 18.468 | 1.00 |
| 9.56       |     |     | N   |    |        |       |        |      |
| ATOM       | 176 | CA  | VAL | 16 | 20.155 | 5.441 | 17.502 | 1.00 |
| 11.99      |     |     | C   |    |        |       |        |      |
| ATOM       | 177 | C   | VAL | 16 | 21.670 | 5.358 | 17.636 | 1.00 |
| 7.73       |     |     | C   |    |        |       |        |      |
| ATOM       | 178 | O   | VAL | 16 | 22.216 | 5.500 | 18.731 | 1.00 |
| 8.83       |     |     | O   |    |        |       |        |      |
| ATOM       | 179 | CB  | VAL | 16 | 19.685 | 6.878 | 17.725 | 1.00 |
| 18.37      |     |     | C   |    |        |       |        |      |
| ATOM       | 180 | CG1 | VAL | 16 | 20.154 | 7.367 | 19.098 | 1.00 |
| 39.61      |     |     | C   |    |        |       |        |      |
| ATOM       | 181 | CG2 | VAL | 16 | 20.265 | 7.777 | 16.633 |      |
| 1.00115.21 |     |     | C   |    |        |       |        |      |
| ATOM       | 182 | HN  | VAL | 16 | 19.927 | 4.409 | 19.341 | 1.00 |
| 9.76       |     |     | H   |    |        |       |        |      |
| ATOM       | 183 | HA  | VAL | 16 | 19.880 | 5.138 | 16.500 | 1.00 |



|            |     |      |     |    |        |       |        |      |  |
|------------|-----|------|-----|----|--------|-------|--------|------|--|
| 17.27      |     |      | H   |    |        |       |        |      |  |
| ATOM       | 184 | HB   | VAL | 16 | 18.607 | 6.912 | 17.683 | 1.00 |  |
| 52.63      |     |      | H   |    |        |       |        |      |  |
| ATOM       | 185 | HG11 | VAL | 16 | 19.980 | 6.597 | 19.834 |      |  |
| 1.00128.07 |     |      | H   |    |        |       |        |      |  |
| ATOM       | 186 | HG12 | VAL | 16 | 19.602 | 8.255 | 19.370 |      |  |
| 1.00154.13 |     |      | H   |    |        |       |        |      |  |
| ATOM       | 187 | HG13 | VAL | 16 | 21.209 | 7.598 | 19.060 |      |  |
| 1.00135.74 |     |      | H   |    |        |       |        |      |  |
| ATOM       | 188 | HG21 | VAL | 16 | 19.884 | 8.780 | 16.754 |      |  |
| 1.00229.05 |     |      | H   |    |        |       |        |      |  |
| ATOM       | 189 | HG22 | VAL | 16 | 19.977 | 7.396 | 15.665 |      |  |
| 1.00261.82 |     |      | H   |    |        |       |        |      |  |
| ATOM       | 190 | HG23 | VAL | 16 | 21.342 | 7.789 | 16.710 |      |  |
| 1.00210.07 |     |      | H   |    |        |       |        |      |  |
| ATOM       | 191 | N    | ASP | 17 | 22.344 | 5.121 | 16.513 | 1.00 |  |
| 14.34      |     |      | N   |    |        |       |        |      |  |
| ATOM       | 192 | CA   | ASP | 17 | 23.802 | 5.017 | 16.502 | 1.00 |  |
| 11.90      |     |      | C   |    |        |       |        |      |  |
| ATOM       | 193 | C    | ASP | 17 | 24.432 | 6.323 | 16.038 | 1.00 |  |
| 13.15      |     |      | C   |    |        |       |        |      |  |
| ATOM       | 194 | O    | ASP | 17 | 24.029 | 6.897 | 15.026 | 1.00 |  |
| 25.96      |     |      | O   |    |        |       |        |      |  |
| ATOM       | 195 | CB   | ASP | 17 | 24.235 | 3.889 | 15.563 | 1.00 |  |
| 20.80      |     |      | C   |    |        |       |        |      |  |
| ATOM       | 196 | CG   | ASP | 17 | 23.840 | 2.540 | 16.150 | 1.00 |  |
| 28.72      |     |      | C   |    |        |       |        |      |  |
| ATOM       | 197 | OD1  | ASP | 17 | 23.839 | 1.572 | 15.407 |      |  |
| 1.00135.42 |     |      | O   |    |        |       |        |      |  |
| ATOM       | 198 | OD2  | ASP | 17 | 23.540 | 2.494 | 17.332 |      |  |
| 1.00114.17 |     |      | O1- |    |        |       |        |      |  |
| ATOM       | 199 | HN   | ASP | 17 | 21.850 | 5.013 | 15.673 | 1.00 |  |
| 28.29      |     |      | H   |    |        |       |        |      |  |
| ATOM       | 200 | HA   | ASP | 17 | 24.155 | 4.791 | 17.500 | 1.00 |  |
| 10.49      |     |      | H   |    |        |       |        |      |  |
| ATOM       | 201 | HB1  | ASP | 17 | 25.310 | 3.922 | 15.438 | 1.00 |  |
| 22.42      |     |      | H   |    |        |       |        |      |  |
| ATOM       | 202 | HB2  | ASP | 17 | 23.758 | 4.019 | 14.603 | 1.00 |  |
| 29.52      |     |      | H   |    |        |       |        |      |  |
| ATOM       | 203 | N    | THR | 18 | 25.440 | 6.777 | 16.779 | 1.00 |  |
| 11.55      |     |      | N   |    |        |       |        |      |  |
| ATOM       | 204 | CA   | THR | 18 | 26.155 | 8.009 | 16.446 | 1.00 |  |
| 17.10      |     |      | C   |    |        |       |        |      |  |
| ATOM       | 205 | C    | THR | 18 | 27.633 | 7.706 | 16.270 | 1.00 |  |
| 10.63      |     |      | C   |    |        |       |        |      |  |
| ATOM       | 206 | O    | THR | 18 | 28.120 | 6.682 | 16.741 | 1.00 |  |
| 6.49       |     |      | O   |    |        |       |        |      |  |
| ATOM       | 207 | CB   | THR | 18 | 25.980 | 9.044 | 17.557 | 1.00 |  |
| 28.52      |     |      | C   |    |        |       |        |      |  |
| ATOM       | 208 | CG2  | THR | 18 | 24.544 | 9.566 | 17.559 | 1.00 |  |
| 45.38      |     |      | C   |    |        |       |        |      |  |
| ATOM       | 209 | OG1  | THR | 18 | 26.276 | 8.448 | 18.809 | 1.00 |  |

|            |     |      |     |    |        |        |        |      |  |
|------------|-----|------|-----|----|--------|--------|--------|------|--|
| 26.49      |     |      | O   |    |        |        |        |      |  |
| ATOM       | 210 | HN   | THR | 18 | 25.718 | 6.263  | 17.567 | 1.00 |  |
| 13.96      |     |      | H   |    |        |        |        |      |  |
| ATOM       | 211 | HA   | THR | 18 | 25.769 | 8.417  | 15.522 | 1.00 |  |
| 26.43      |     |      | H   |    |        |        |        |      |  |
| ATOM       | 212 | HB   | THR | 18 | 26.654 | 9.869  | 17.386 | 1.00 |  |
| 37.43      |     |      | H   |    |        |        |        |      |  |
| ATOM       | 213 | HG1  | THR | 18 | 25.994 | 7.529  | 18.773 | 1.00 |  |
| 71.62      |     |      | H   |    |        |        |        |      |  |
| ATOM       | 214 | HG21 | THR | 18 | 24.368 | 10.132 | 16.655 |      |  |
| 1.00100.44 |     |      |     | H  |        |        |        |      |  |
| ATOM       | 215 | HG22 | THR | 18 | 24.396 | 10.203 | 18.417 |      |  |
| 1.00129.42 |     |      |     | H  |        |        |        |      |  |
| ATOM       | 216 | HG23 | THR | 18 | 23.858 | 8.733  | 17.603 |      |  |
| 1.00156.21 |     |      |     | H  |        |        |        |      |  |
| ATOM       | 217 | N    | VAL | 19 | 28.340 | 8.606  | 15.602 | 1.00 |  |
| 16.32      |     |      | N   |    |        |        |        |      |  |
| ATOM       | 218 | CA   | VAL | 19 | 29.755 | 8.444  | 15.374 | 1.00 |  |
| 13.34      |     |      | C   |    |        |        |        |      |  |
| ATOM       | 219 | C    | VAL | 19 | 30.268 | 9.621  | 14.572 | 1.00 |  |
| 25.88      |     |      | C   |    |        |        |        |      |  |
| ATOM       | 220 | O    | VAL | 19 | 29.846 | 9.875  | 13.445 | 1.00 |  |
| 42.11      |     |      | O   |    |        |        |        |      |  |
| ATOM       | 221 | CB   | VAL | 19 | 30.068 | 7.141  | 14.642 | 1.00 |  |
| 15.48      |     |      | C   |    |        |        |        |      |  |
| ATOM       | 222 | CG1  | VAL | 19 | 29.181 | 7.004  | 13.399 | 1.00 |  |
| 29.06      |     |      | C   |    |        |        |        |      |  |
| ATOM       | 223 | CG2  | VAL | 19 | 31.544 | 7.146  | 14.222 | 1.00 |  |
| 20.67      |     |      | C   |    |        |        |        |      |  |
| ATOM       | 224 | HN   | VAL | 19 | 27.907 | 9.412  | 15.267 | 1.00 |  |
| 26.89      |     |      | H   |    |        |        |        |      |  |
| ATOM       | 225 | HA   | VAL | 19 | 30.256 | 8.431  | 16.331 | 1.00 |  |
| 8.08       |     |      | H   |    |        |        |        |      |  |
| ATOM       | 226 | HB   | VAL | 19 | 29.888 | 6.312  | 15.306 | 1.00 |  |
| 11.49      |     |      | H   |    |        |        |        |      |  |
| ATOM       | 227 | HG11 | VAL | 19 | 29.253 | 5.995  | 13.017 |      |  |
| 1.00137.43 |     |      |     | H  |        |        |        |      |  |
| ATOM       | 228 | HG12 | VAL | 19 | 29.511 | 7.698  | 12.642 | 1.00 |  |
| 93.29      |     |      | H   |    |        |        |        |      |  |
| ATOM       | 229 | HG13 | VAL | 19 | 28.156 | 7.215  | 13.660 |      |  |
| 1.00108.69 |     |      |     | H  |        |        |        |      |  |
| ATOM       | 230 | HG21 | VAL | 19 | 31.855 | 6.144  | 13.973 | 1.00 |  |
| 99.42      |     |      | H   |    |        |        |        |      |  |
| ATOM       | 231 | HG22 | VAL | 19 | 32.149 | 7.521  | 15.040 |      |  |
| 1.00111.36 |     |      |     | H  |        |        |        |      |  |
| ATOM       | 232 | HG23 | VAL | 19 | 31.670 | 7.789  | 13.364 | 1.00 |  |
| 77.11      |     |      | H   |    |        |        |        |      |  |
| ATOM       | 233 | N    | PHE | 20 | 31.172 | 10.331 | 15.191 | 1.00 |  |
| 24.58      |     |      | N   |    |        |        |        |      |  |
| ATOM       | 234 | CA   | PHE | 20 | 31.780 | 11.509 | 14.600 | 1.00 |  |
| 40.34      |     |      | C   |    |        |        |        |      |  |
| ATOM       | 235 | C    | PHE | 20 | 33.133 | 11.174 | 13.985 | 1.00 |  |

|            |     |     |     |    |        |        |        |      |
|------------|-----|-----|-----|----|--------|--------|--------|------|
| 40.37      |     |     | C   |    |        |        |        |      |
| ATOM       | 236 | O   | PHE | 20 | 33.325 | 11.312 | 12.777 | 1.00 |
| 66.02      |     |     | O   |    |        |        |        |      |
| ATOM       | 237 | CB  | PHE | 20 | 31.942 | 12.596 | 15.680 | 1.00 |
| 48.79      |     |     | C   |    |        |        |        |      |
| ATOM       | 238 | CG  | PHE | 20 | 32.118 | 11.976 | 17.060 | 1.00 |
| 35.75      |     |     | C   |    |        |        |        |      |
| ATOM       | 239 | CD1 | PHE | 20 | 31.068 | 11.254 | 17.667 | 1.00 |
| 30.20      |     |     | C   |    |        |        |        |      |
| ATOM       | 240 | CD2 | PHE | 20 | 33.329 | 12.140 | 17.747 | 1.00 |
| 40.95      |     |     | C   |    |        |        |        |      |
| ATOM       | 241 | CE1 | PHE | 20 | 31.243 | 10.705 | 18.941 | 1.00 |
| 30.41      |     |     | C   |    |        |        |        |      |
| ATOM       | 242 | CE2 | PHE | 20 | 33.498 | 11.586 | 19.021 | 1.00 |
| 45.84      |     |     | C   |    |        |        |        |      |
| ATOM       | 243 | CZ  | PHE | 20 | 32.455 | 10.869 | 19.617 | 1.00 |
| 40.81      |     |     | C   |    |        |        |        |      |
| ATOM       | 244 | HN  | PHE | 20 | 31.429 | 10.061 | 16.087 | 1.00 |
| 16.73      |     |     | H   |    |        |        |        |      |
| ATOM       | 245 | HA  | PHE | 20 | 31.135 | 11.892 | 13.818 | 1.00 |
| 59.91      |     |     | H   |    |        |        |        |      |
| ATOM       | 246 | HB1 | PHE | 20 | 31.070 | 13.206 | 15.685 | 1.00 |
| 67.15      |     |     | H   |    |        |        |        |      |
| ATOM       | 247 | HB2 | PHE | 20 | 32.798 | 13.217 | 15.453 | 1.00 |
| 58.17      |     |     | H   |    |        |        |        |      |
| ATOM       | 248 | HD1 | PHE | 20 | 30.127 | 11.112 | 17.152 | 1.00 |
| 33.34      |     |     | H   |    |        |        |        |      |
| ATOM       | 249 | HD2 | PHE | 20 | 34.137 | 12.692 | 17.290 | 1.00 |
| 49.35      |     |     | H   |    |        |        |        |      |
| ATOM       | 250 | HE1 | PHE | 20 | 30.439 | 10.154 | 19.401 | 1.00 |
| 30.61      |     |     | H   |    |        |        |        |      |
| ATOM       | 251 | HE2 | PHE | 20 | 34.434 | 11.712 | 19.545 | 1.00 |
| 61.27      |     |     | H   |    |        |        |        |      |
| ATOM       | 252 | HZ  | PHE | 20 | 32.587 | 10.443 | 20.602 | 1.00 |
| 52.66      |     |     | H   |    |        |        |        |      |
| ATOM       | 253 | N   | GLU | 21 | 34.077 | 10.769 | 14.825 | 1.00 |
| 41.31      |     |     | N   |    |        |        |        |      |
| ATOM       | 254 | CA  | GLU | 21 | 35.415 | 10.457 | 14.373 | 1.00 |
| 56.16      |     |     | C   |    |        |        |        |      |
| ATOM       | 255 | C   | GLU | 21 | 35.695 | 8.961  | 14.449 | 1.00 |
| 58.61      |     |     | C   |    |        |        |        |      |
| ATOM       | 256 | O   | GLU | 21 | 34.802 | 8.160  | 14.722 |      |
| 1.00201.19 |     |     | O   |    |        |        |        |      |
| ATOM       | 257 | CB  | GLU | 21 | 36.370 | 11.219 | 15.263 | 1.00 |
| 57.37      |     |     | C   |    |        |        |        |      |
| ATOM       | 258 | CG  | GLU | 21 | 36.278 | 10.677 | 16.687 |      |
| 1.00193.56 |     |     | C   |    |        |        |        |      |
| ATOM       | 259 | CD  | GLU | 21 | 37.025 | 11.601 | 17.644 |      |
| 1.00304.62 |     |     | C   |    |        |        |        |      |
| ATOM       | 260 | OE1 | GLU | 21 | 37.664 | 12.524 | 17.167 |      |
| 1.00451.81 |     |     | O   |    |        |        |        |      |
| ATOM       | 261 | OE2 | GLU | 21 | 36.942 | 11.376 | 18.840 |      |

|            |     |     |     |     |        |        |        |      |  |
|------------|-----|-----|-----|-----|--------|--------|--------|------|--|
| 1.00442.88 |     |     |     | O1- |        |        |        |      |  |
| ATOM       | 262 | HN  | GLU | 21  | 33.886 | 10.705 | 15.781 | 1.00 |  |
| 50.82      |     |     | H   |     |        |        |        |      |  |
| ATOM       | 263 | HA  | GLU | 21  | 35.551 | 10.791 | 13.353 | 1.00 |  |
| 85.72      |     |     | H   |     |        |        |        |      |  |
| ATOM       | 264 | HB1 | GLU | 21  | 36.087 | 12.260 | 15.262 | 1.00 |  |
| 46.37      |     |     | H   |     |        |        |        |      |  |
| ATOM       | 265 | HB2 | GLU | 21  | 37.369 | 11.110 | 14.896 |      |  |
| 1.00131.81 |     |     |     | H   |        |        |        |      |  |
| ATOM       | 266 | HG1 | GLU | 21  | 36.716 | 9.696  | 16.722 |      |  |
| 1.00314.91 |     |     |     | H   |        |        |        |      |  |
| ATOM       | 267 | HG2 | GLU | 21  | 35.244 | 10.613 | 16.980 |      |  |
| 1.00266.92 |     |     |     | H   |        |        |        |      |  |
| ATOM       | 268 | N   | GLY | 22  | 36.946 | 8.598  | 14.190 | 1.00 |  |
| 86.70      |     |     | N   |     |        |        |        |      |  |
| ATOM       | 269 | CA  | GLY | 22  | 37.359 | 7.191  | 14.209 |      |  |
| 1.00104.66 |     |     |     | C   |        |        |        |      |  |
| ATOM       | 270 | C   | GLY | 22  | 37.944 | 6.788  | 15.562 | 1.00 |  |
| 71.50      |     |     | C   |     |        |        |        |      |  |
| ATOM       | 271 | O   | GLY | 22  | 38.152 | 5.603  | 15.824 | 1.00 |  |
| 89.87      |     |     | O   |     |        |        |        |      |  |
| ATOM       | 272 | HN  | GLY | 22  | 37.606 | 9.292  | 13.973 |      |  |
| 1.00214.64 |     |     |     | H   |        |        |        |      |  |
| ATOM       | 273 | HA1 | GLY | 22  | 38.107 | 7.036  | 13.446 |      |  |
| 1.00152.47 |     |     |     | H   |        |        |        |      |  |
| ATOM       | 274 | HA2 | GLY | 22  | 36.504 | 6.564  | 13.995 |      |  |
| 1.00118.15 |     |     |     | H   |        |        |        |      |  |
| ATOM       | 275 | N   | ASP | 23  | 38.216 | 7.770  | 16.411 | 1.00 |  |
| 44.68      |     |     | N   |     |        |        |        |      |  |
| ATOM       | 276 | CA  | ASP | 23  | 38.789 | 7.489  | 17.726 | 1.00 |  |
| 43.33      |     |     | C   |     |        |        |        |      |  |
| ATOM       | 277 | C   | ASP | 23  | 37.852 | 6.618  | 18.554 | 1.00 |  |
| 37.55      |     |     | C   |     |        |        |        |      |  |
| ATOM       | 278 | O   | ASP | 23  | 38.296 | 5.717  | 19.266 | 1.00 |  |
| 61.37      |     |     | O   |     |        |        |        |      |  |
| ATOM       | 279 | CB  | ASP | 23  | 39.058 | 8.796  | 18.475 | 1.00 |  |
| 40.74      |     |     | C   |     |        |        |        |      |  |
| ATOM       | 280 | CG  | ASP | 23  | 40.222 | 9.540  | 17.827 |      |  |
| 1.00141.86 |     |     |     | C   |        |        |        |      |  |
| ATOM       | 281 | OD1 | ASP | 23  | 40.920 | 8.931  | 17.032 |      |  |
| 1.00328.18 |     |     |     | O   |        |        |        |      |  |
| ATOM       | 282 | OD2 | ASP | 23  | 40.398 | 10.706 | 18.135 |      |  |
| 1.00304.58 |     |     |     | O1- |        |        |        |      |  |
| ATOM       | 283 | HN  | ASP | 23  | 38.041 | 8.697  | 16.149 | 1.00 |  |
| 40.86      |     |     | H   |     |        |        |        |      |  |
| ATOM       | 284 | HA  | ASP | 23  | 39.721 | 6.968  | 17.593 | 1.00 |  |
| 72.12      |     |     | H   |     |        |        |        |      |  |
| ATOM       | 285 | HB1 | ASP | 23  | 39.306 | 8.573  | 19.501 | 1.00 |  |
| 94.15      |     |     | H   |     |        |        |        |      |  |
| ATOM       | 286 | HB2 | ASP | 23  | 38.175 | 9.414  | 18.448 | 1.00 |  |
| 93.26      |     |     | H   |     |        |        |        |      |  |
| ATOM       | 287 | N   | MET | 24  | 36.557 | 6.897  | 18.464 | 1.00 |  |

|            |     |     |     |    |        |       |        |      |  |
|------------|-----|-----|-----|----|--------|-------|--------|------|--|
| 23.24      |     |     | N   |    |        |       |        |      |  |
| ATOM       | 288 | CA  | MET | 24 | 35.569 | 6.133 | 19.220 | 1.00 |  |
| 32.50      |     |     | C   |    |        |       |        |      |  |
| ATOM       | 289 | C   | MET | 24 | 34.182 | 6.265 | 18.597 | 1.00 |  |
| 25.13      |     |     | C   |    |        |       |        |      |  |
| ATOM       | 290 | O   | MET | 24 | 33.950 | 7.118 | 17.742 | 1.00 |  |
| 54.40      |     |     | O   |    |        |       |        |      |  |
| ATOM       | 291 | CB  | MET | 24 | 35.531 | 6.622 | 20.670 | 1.00 |  |
| 47.36      |     |     | C   |    |        |       |        |      |  |
| ATOM       | 292 | CG  | MET | 24 | 35.113 | 8.094 | 20.707 |      |  |
| 1.00151.73 |     |     | C   |    |        |       |        |      |  |
| ATOM       | 293 | SD  | MET | 24 | 35.199 | 8.710 | 22.409 |      |  |
| 1.00209.23 |     |     | S   |    |        |       |        |      |  |
| ATOM       | 294 | CE  | MET | 24 | 33.783 | 7.799 | 23.075 |      |  |
| 1.00243.29 |     |     | C   |    |        |       |        |      |  |
| ATOM       | 295 | HN  | MET | 24 | 36.264 | 7.629 | 17.885 | 1.00 |  |
| 17.32      |     |     | H   |    |        |       |        |      |  |
| ATOM       | 296 | HA  | MET | 24 | 35.853 | 5.090 | 19.214 | 1.00 |  |
| 48.94      |     |     | H   |    |        |       |        |      |  |
| ATOM       | 297 | HB1 | MET | 24 | 36.512 | 6.519 | 21.110 |      |  |
| 1.00124.40 |     |     | H   |    |        |       |        |      |  |
| ATOM       | 298 | HB2 | MET | 24 | 34.821 | 6.031 | 21.230 |      |  |
| 1.00166.96 |     |     | H   |    |        |       |        |      |  |
| ATOM       | 299 | HG1 | MET | 24 | 34.102 | 8.194 | 20.339 |      |  |
| 1.00331.71 |     |     | H   |    |        |       |        |      |  |
| ATOM       | 300 | HG2 | MET | 24 | 35.778 | 8.673 | 20.082 |      |  |
| 1.00302.30 |     |     | H   |    |        |       |        |      |  |
| ATOM       | 301 | HE1 | MET | 24 | 33.432 | 8.289 | 23.972 |      |  |
| 1.00340.44 |     |     | H   |    |        |       |        |      |  |
| ATOM       | 302 | HE2 | MET | 24 | 34.080 | 6.791 | 23.313 |      |  |
| 1.00373.88 |     |     | H   |    |        |       |        |      |  |
| ATOM       | 303 | HE3 | MET | 24 | 32.991 | 7.773 | 22.338 |      |  |
| 1.00386.81 |     |     | H   |    |        |       |        |      |  |
| ATOM       | 304 | N   | VAL | 25 | 33.260 | 5.407 | 19.041 | 1.00 |  |
| 22.44      |     |     | N   |    |        |       |        |      |  |
| ATOM       | 305 | CA  | VAL | 25 | 31.884 | 5.417 | 18.537 | 1.00 |  |
| 15.37      |     |     | C   |    |        |       |        |      |  |
| ATOM       | 306 | C   | VAL | 25 | 30.895 | 5.600 | 19.683 | 1.00 |  |
| 17.47      |     |     | C   |    |        |       |        |      |  |
| ATOM       | 307 | O   | VAL | 25 | 31.096 | 5.093 | 20.786 | 1.00 |  |
| 29.52      |     |     | O   |    |        |       |        |      |  |
| ATOM       | 308 | CB  | VAL | 25 | 31.577 | 4.107 | 17.801 | 1.00 |  |
| 23.36      |     |     | C   |    |        |       |        |      |  |
| ATOM       | 309 | CG1 | VAL | 25 | 30.078 | 4.046 | 17.451 | 1.00 |  |
| 58.39      |     |     | C   |    |        |       |        |      |  |
| ATOM       | 310 | CG2 | VAL | 25 | 32.409 | 4.045 | 16.515 | 1.00 |  |
| 55.25      |     |     | C   |    |        |       |        |      |  |
| ATOM       | 311 | HN  | VAL | 25 | 33.511 | 4.753 | 19.726 | 1.00 |  |
| 48.11      |     |     | H   |    |        |       |        |      |  |
| ATOM       | 312 | HA  | VAL | 25 | 31.758 | 6.242 | 17.843 | 1.00 |  |
| 9.25       |     |     | H   |    |        |       |        |      |  |
| ATOM       | 313 | HB  | VAL | 25 | 31.831 | 3.271 | 18.436 | 1.00 |  |

|            |     |      |     |    |        |       |        |      |  |  |
|------------|-----|------|-----|----|--------|-------|--------|------|--|--|
| 52.45      |     |      | H   |    |        |       |        |      |  |  |
| ATOM       | 314 | HG11 | VAL | 25 | 29.720 | 5.037 | 17.209 |      |  |  |
| 1.00171.07 |     |      | H   |    |        |       |        |      |  |  |
| ATOM       | 315 | HG12 | VAL | 25 | 29.527 | 3.668 | 18.298 |      |  |  |
| 1.00166.22 |     |      | H   |    |        |       |        |      |  |  |
| ATOM       | 316 | HG13 | VAL | 25 | 29.924 | 3.391 | 16.604 |      |  |  |
| 1.00134.76 |     |      | H   |    |        |       |        |      |  |  |
| ATOM       | 317 | HG21 | VAL | 25 | 32.089 | 3.202 | 15.920 |      |  |  |
| 1.00141.88 |     |      | H   |    |        |       |        |      |  |  |
| ATOM       | 318 | HG22 | VAL | 25 | 33.453 | 3.933 | 16.766 |      |  |  |
| 1.00184.50 |     |      | H   |    |        |       |        |      |  |  |
| ATOM       | 319 | HG23 | VAL | 25 | 32.268 | 4.956 | 15.951 |      |  |  |
| 1.00133.90 |     |      | H   |    |        |       |        |      |  |  |
| ATOM       | 320 | N    | THR | 26 | 29.827 | 6.343 | 19.405 | 1.00 |  |  |
| 13.60      |     |      | N   |    |        |       |        |      |  |  |
| ATOM       | 321 | CA   | THR | 26 | 28.790 | 6.623 | 20.397 | 1.00 |  |  |
| 21.19      |     |      | C   |    |        |       |        |      |  |  |
| ATOM       | 322 | C    | THR | 26 | 27.440 | 6.062 | 19.951 | 1.00 |  |  |
| 16.55      |     |      | C   |    |        |       |        |      |  |  |
| ATOM       | 323 | O    | THR | 26 | 27.048 | 6.207 | 18.793 | 1.00 |  |  |
| 11.43      |     |      | O   |    |        |       |        |      |  |  |
| ATOM       | 324 | CB   | THR | 26 | 28.682 | 8.135 | 20.580 | 1.00 |  |  |
| 27.07      |     |      | C   |    |        |       |        |      |  |  |
| ATOM       | 325 | CG2  | THR | 26 | 27.555 | 8.464 | 21.563 | 1.00 |  |  |
| 44.39      |     |      | C   |    |        |       |        |      |  |  |
| ATOM       | 326 | OG1  | THR | 26 | 29.914 | 8.629 | 21.084 | 1.00 |  |  |
| 34.75      |     |      | O   |    |        |       |        |      |  |  |
| ATOM       | 327 | HN   | THR | 26 | 29.735 | 6.721 | 18.506 | 1.00 |  |  |
| 10.81      |     |      | H   |    |        |       |        |      |  |  |
| ATOM       | 328 | HA   | THR | 26 | 29.058 | 6.177 | 21.344 | 1.00 |  |  |
| 33.16      |     |      | H   |    |        |       |        |      |  |  |
| ATOM       | 329 | HB   | THR | 26 | 28.473 | 8.591 | 19.621 | 1.00 |  |  |
| 20.60      |     |      | H   |    |        |       |        |      |  |  |
| ATOM       | 330 | HG1  | THR | 26 | 30.128 | 8.134 | 21.877 | 1.00 |  |  |
| 77.72      |     |      | H   |    |        |       |        |      |  |  |
| ATOM       | 331 | HG21 | THR | 26 | 27.592 | 9.515 | 21.811 |      |  |  |
| 1.00126.99 |     |      | H   |    |        |       |        |      |  |  |
| ATOM       | 332 | HG22 | THR | 26 | 27.681 | 7.878 | 22.462 |      |  |  |
| 1.00108.32 |     |      | H   |    |        |       |        |      |  |  |
| ATOM       | 333 | HG23 | THR | 26 | 26.602 | 8.234 | 21.115 |      |  |  |
| 1.00151.99 |     |      | H   |    |        |       |        |      |  |  |
| ATOM       | 334 | N    | ARG | 27 | 26.735 | 5.421 | 20.883 | 1.00 |  |  |
| 22.38      |     |      | N   |    |        |       |        |      |  |  |
| ATOM       | 335 | CA   | ARG | 27 | 25.422 | 4.836 | 20.591 | 1.00 |  |  |
| 20.21      |     |      | C   |    |        |       |        |      |  |  |
| ATOM       | 336 | C    | ARG | 27 | 24.492 | 5.016 | 21.787 | 1.00 |  |  |
| 16.96      |     |      | C   |    |        |       |        |      |  |  |
| ATOM       | 337 | O    | ARG | 27 | 24.952 | 5.158 | 22.920 | 1.00 |  |  |
| 20.06      |     |      | O   |    |        |       |        |      |  |  |
| ATOM       | 338 | CB   | ARG | 27 | 25.578 | 3.346 | 20.278 | 1.00 |  |  |
| 22.14      |     |      | C   |    |        |       |        |      |  |  |
| ATOM       | 339 | CG   | ARG | 27 | 26.050 | 2.604 | 21.533 |      |  |  |

|            |     |      |     |     |        |        |        |      |  |  |
|------------|-----|------|-----|-----|--------|--------|--------|------|--|--|
| 1.00124.30 |     |      |     | C   |        |        |        |      |  |  |
| ATOM       | 340 | CD   | ARG | 27  | 26.438 | 1.171  | 21.163 |      |  |  |
| 1.00109.38 |     |      |     | C   |        |        |        |      |  |  |
| ATOM       | 341 | NE   | ARG | 27  | 26.819 | 0.425  | 22.358 |      |  |  |
| 1.00227.73 |     |      |     | N   |        |        |        |      |  |  |
| ATOM       | 342 | CZ   | ARG | 27  | 28.036 | 0.536  | 22.880 |      |  |  |
| 1.00426.12 |     |      |     | C   |        |        |        |      |  |  |
| ATOM       | 343 | NH1  | ARG | 27  | 28.352 | -0.144 | 23.947 |      |  |  |
| 1.00767.09 |     |      |     | N1+ |        |        |        |      |  |  |
| ATOM       | 344 | NH2  | ARG | 27  | 28.915 | 1.325  | 22.325 |      |  |  |
| 1.00581.78 |     |      |     | N   |        |        |        |      |  |  |
| ATOM       | 345 | HN   | ARG | 27  | 27.102 | 5.340  | 21.787 | 1.00 |  |  |
| 30.75      |     |      |     | H   |        |        |        |      |  |  |
| ATOM       | 346 | HA   | ARG | 27  | 24.989 | 5.332  | 19.732 | 1.00 |  |  |
| 23.13      |     |      |     | H   |        |        |        |      |  |  |
| ATOM       | 347 | HB1  | ARG | 27  | 26.306 | 3.216  | 19.492 | 1.00 |  |  |
| 87.46      |     |      |     | H   |        |        |        |      |  |  |
| ATOM       | 348 | HB2  | ARG | 27  | 24.628 | 2.944  | 19.958 |      |  |  |
| 1.00103.36 |     |      |     | H   |        |        |        |      |  |  |
| ATOM       | 349 | HG1  | ARG | 27  | 25.252 | 2.578  | 22.261 |      |  |  |
| 1.00281.97 |     |      |     | H   |        |        |        |      |  |  |
| ATOM       | 350 | HG2  | ARG | 27  | 26.905 | 3.113  | 21.952 |      |  |  |
| 1.00276.19 |     |      |     | H   |        |        |        |      |  |  |
| ATOM       | 351 | HD1  | ARG | 27  | 27.269 | 1.194  | 20.473 |      |  |  |
| 1.00183.60 |     |      |     | H   |        |        |        |      |  |  |
| ATOM       | 352 | HD2  | ARG | 27  | 25.599 | 0.684  | 20.692 |      |  |  |
| 1.00142.93 |     |      |     | H   |        |        |        |      |  |  |
| ATOM       | 353 | HE   | ARG | 27  | 26.165 | -0.168 | 22.782 |      |  |  |
| 1.00372.53 |     |      |     | H   |        |        |        |      |  |  |
| ATOM       | 354 | HH11 | ARG | 27  | 27.679 | -0.749 | 24.372 |      |  |  |
| 1.00910.59 |     |      |     | H   |        |        |        |      |  |  |
| ATOM       | 355 | HH12 | ARG | 27  | 29.268 | -0.062 | 24.339 |      |  |  |
| 1.00999.99 |     |      |     | H   |        |        |        |      |  |  |
| ATOM       | 356 | HH21 | ARG | 27  | 28.673 | 1.846  | 21.506 |      |  |  |
| 1.00532.54 |     |      |     | H   |        |        |        |      |  |  |
| ATOM       | 357 | HH22 | ARG | 27  | 29.831 | 1.407  | 22.717 |      |  |  |
| 1.00948.84 |     |      |     | H   |        |        |        |      |  |  |
| ATOM       | 358 | N    | SER | 28  | 23.180 | 5.017  | 21.535 | 1.00 |  |  |
| 14.60      |     |      |     | N   |        |        |        |      |  |  |
| ATOM       | 359 | CA   | SER | 28  | 22.203 | 5.188  | 22.613 | 1.00 |  |  |
| 14.92      |     |      |     | C   |        |        |        |      |  |  |
| ATOM       | 360 | C    | SER | 28  | 20.991 | 4.286  | 22.401 | 1.00 |  |  |
| 12.12      |     |      |     | C   |        |        |        |      |  |  |
| ATOM       | 361 | O    | SER | 28  | 20.608 | 3.994  | 21.268 | 1.00 |  |  |
| 13.41      |     |      |     | O   |        |        |        |      |  |  |
| ATOM       | 362 | CB   | SER | 28  | 21.748 | 6.647  | 22.671 | 1.00 |  |  |
| 23.26      |     |      |     | C   |        |        |        |      |  |  |
| ATOM       | 363 | OG   | SER | 28  | 22.867 | 7.477  | 22.952 |      |  |  |
| 1.00146.32 |     |      |     | O   |        |        |        |      |  |  |
| ATOM       | 364 | HN   | SER | 28  | 22.864 | 4.903  | 20.612 | 1.00 |  |  |
| 15.23      |     |      |     | H   |        |        |        |      |  |  |
| ATOM       | 365 | HA   | SER | 28  | 22.661 | 4.932  | 23.558 | 1.00 |  |  |

|            |     |     |     |    |        |       |        |      |     |
|------------|-----|-----|-----|----|--------|-------|--------|------|-----|
| 15.44      |     |     | H   |    |        |       |        |      |     |
| ATOM       | 366 | HB1 | SER | 28 | 20.999 | 6.759 | 23.445 | 1.00 |     |
| 88.73      |     |     | H   |    |        |       |        |      |     |
| ATOM       | 367 | HB2 | SER | 28 | 21.323 | 6.932 | 21.724 |      |     |
| 1.00124.68 |     |     |     |    |        |       |        |      | H   |
| ATOM       | 368 | HG  | SER | 28 | 23.650 | 7.046 | 22.601 |      |     |
| 1.00242.47 |     |     |     |    |        |       |        |      | H   |
| ATOM       | 369 | N   | CYS | 29 | 20.385 | 3.861 | 23.505 | 1.00 |     |
| 10.48      |     |     | N   |    |        |       |        |      |     |
| ATOM       | 370 | CA  | CYS | 29 | 19.207 | 3.005 | 23.446 | 1.00 |     |
| 9.97       |     |     | C   |    |        |       |        |      |     |
| ATOM       | 371 | C   | CYS | 29 | 18.617 | 2.840 | 24.845 | 1.00 |     |
| 11.60      |     |     | C   |    |        |       |        |      |     |
| ATOM       | 372 | O   | CYS | 29 | 19.266 | 2.293 | 25.738 | 1.00 |     |
| 15.64      |     |     | O   |    |        |       |        |      |     |
| ATOM       | 373 | CB  | CYS | 29 | 19.567 | 1.633 | 22.850 | 1.00 |     |
| 9.52       |     |     | C   |    |        |       |        |      |     |
| ATOM       | 374 | SG  | CYS | 29 | 18.152 | 0.968 | 21.957 | 1.00 |     |
| 10.40      |     |     | S   |    |        |       |        |      |     |
| ATOM       | 375 | HN  | CYS | 29 | 20.731 | 4.139 | 24.378 | 1.00 |     |
| 11.10      |     |     | H   |    |        |       |        |      |     |
| ATOM       | 376 | HA  | CYS | 29 | 18.471 | 3.479 | 22.814 | 1.00 |     |
| 11.08      |     |     | H   |    |        |       |        |      |     |
| ATOM       | 377 | HB1 | CYS | 29 | 19.836 | 0.941 | 23.639 | 1.00 |     |
| 9.33       |     |     | H   |    |        |       |        |      |     |
| ATOM       | 378 | HB2 | CYS | 29 | 20.397 | 1.739 | 22.171 | 1.00 |     |
| 10.78      |     |     | H   |    |        |       |        |      |     |
| ATOM       | 379 | N   | GLU | 30 | 17.394 | 3.324 | 25.037 | 1.00 |     |
| 13.52      |     |     | N   |    |        |       |        |      |     |
| ATOM       | 380 | CA  | GLU | 30 | 16.742 | 3.232 | 26.340 | 1.00 |     |
| 17.41      |     |     | C   |    |        |       |        |      |     |
| ATOM       | 381 | C   | GLU | 30 | 16.104 | 1.860 | 26.533 | 1.00 |     |
| 10.81      |     |     | C   |    |        |       |        |      |     |
| ATOM       | 382 | O   | GLU | 30 | 15.683 | 1.220 | 25.571 | 1.00 |     |
| 23.22      |     |     | O   |    |        |       |        |      |     |
| ATOM       | 383 | CB  | GLU | 30 | 15.675 | 4.320 | 26.464 | 1.00 |     |
| 37.83      |     |     | C   |    |        |       |        |      |     |
| ATOM       | 384 | CG  | GLU | 30 | 16.334 | 5.695 | 26.326 |      |     |
| 1.00108.13 |     |     |     |    |        |       |        |      | C   |
| ATOM       | 385 | CD  | GLU | 30 | 17.256 | 5.951 | 27.513 |      |     |
| 1.00240.52 |     |     |     |    |        |       |        |      | C   |
| ATOM       | 386 | OE1 | GLU | 30 | 17.084 | 5.294 | 28.526 |      |     |
| 1.00422.56 |     |     |     |    |        |       |        |      | O   |
| ATOM       | 387 | OE2 | GLU | 30 | 18.122 | 6.803 | 27.390 |      |     |
| 1.00410.81 |     |     |     |    |        |       |        |      | O1- |
| ATOM       | 388 | HN  | GLU | 30 | 16.923 | 3.758 | 24.291 | 1.00 |     |
| 15.61      |     |     | H   |    |        |       |        |      |     |
| ATOM       | 389 | HA  | GLU | 30 | 17.480 | 3.382 | 27.114 | 1.00 |     |
| 24.60      |     |     | H   |    |        |       |        |      |     |
| ATOM       | 390 | HB1 | GLU | 30 | 15.196 | 4.247 | 27.428 | 1.00 |     |
| 72.67      |     |     | H   |    |        |       |        |      |     |
| ATOM       | 391 | HB2 | GLU | 30 | 14.939 | 4.194 | 25.683 | 1.00 |     |



|            |     |     |     |    |        |        |        |      |  |
|------------|-----|-----|-----|----|--------|--------|--------|------|--|
| 56.47      |     |     | H   |    |        |        |        |      |  |
| ATOM       | 392 | HG1 | GLU | 30 | 15.569 | 6.453  | 26.296 |      |  |
| 1.00196.66 |     |     | H   |    |        |        |        |      |  |
| ATOM       | 393 | HG2 | GLU | 30 | 16.907 | 5.726  | 25.411 |      |  |
| 1.00140.67 |     |     | H   |    |        |        |        |      |  |
| ATOM       | 394 | N   | LYS | 31 | 16.036 | 1.417  | 27.787 | 1.00 |  |
| 11.96      |     |     | N   |    |        |        |        |      |  |
| ATOM       | 395 | CA  | LYS | 31 | 15.447 | 0.117  | 28.116 | 1.00 |  |
| 11.40      |     |     | C   |    |        |        |        |      |  |
| ATOM       | 396 | C   | LYS | 31 | 14.158 | 0.317  | 28.908 | 1.00 |  |
| 10.99      |     |     | C   |    |        |        |        |      |  |
| ATOM       | 397 | O   | LYS | 31 | 14.070 | 1.210  | 29.750 | 1.00 |  |
| 12.86      |     |     | O   |    |        |        |        |      |  |
| ATOM       | 398 | CB  | LYS | 31 | 16.430 | -0.707 | 28.954 | 1.00 |  |
| 21.40      |     |     | C   |    |        |        |        |      |  |
| ATOM       | 399 | CG  | LYS | 31 | 17.812 | -0.737 | 28.284 | 1.00 |  |
| 57.81      |     |     | C   |    |        |        |        |      |  |
| ATOM       | 400 | CD  | LYS | 31 | 17.749 | -1.518 | 26.966 |      |  |
| 1.00115.52 |     |     | C   |    |        |        |        |      |  |
| ATOM       | 401 | CE  | LYS | 31 | 19.171 | -1.773 | 26.463 |      |  |
| 1.00250.23 |     |     | C   |    |        |        |        |      |  |
| ATOM       | 402 | NZ  | LYS | 31 | 19.115 | -2.525 | 25.177 |      |  |
| 1.00462.10 |     |     | N1+ |    |        |        |        |      |  |
| ATOM       | 403 | HN  | LYS | 31 | 16.391 | 1.976  | 28.510 | 1.00 |  |
| 26.13      |     |     | H   |    |        |        |        |      |  |
| ATOM       | 404 | HA  | LYS | 31 | 15.213 | -0.423 | 27.209 | 1.00 |  |
| 13.87      |     |     | H   |    |        |        |        |      |  |
| ATOM       | 405 | HB1 | LYS | 31 | 16.059 | -1.717 | 29.049 | 1.00 |  |
| 37.63      |     |     | H   |    |        |        |        |      |  |
| ATOM       | 406 | HB2 | LYS | 31 | 16.518 | -0.266 | 29.935 | 1.00 |  |
| 47.19      |     |     | H   |    |        |        |        |      |  |
| ATOM       | 407 | HG1 | LYS | 31 | 18.519 | -1.214 | 28.946 |      |  |
| 1.00126.32 |     |     | H   |    |        |        |        |      |  |
| ATOM       | 408 | HG2 | LYS | 31 | 18.136 | 0.274  | 28.085 |      |  |
| 1.00114.19 |     |     | H   |    |        |        |        |      |  |
| ATOM       | 409 | HD1 | LYS | 31 | 17.214 | -0.942 | 26.229 |      |  |
| 1.00198.45 |     |     | H   |    |        |        |        |      |  |
| ATOM       | 410 | HD2 | LYS | 31 | 17.247 | -2.460 | 27.127 |      |  |
| 1.00200.14 |     |     | H   |    |        |        |        |      |  |
| ATOM       | 411 | HE1 | LYS | 31 | 19.714 | -2.352 | 27.195 |      |  |
| 1.00374.64 |     |     | H   |    |        |        |        |      |  |
| ATOM       | 412 | HE2 | LYS | 31 | 19.672 | -0.830 | 26.306 |      |  |
| 1.00403.27 |     |     | H   |    |        |        |        |      |  |
| ATOM       | 413 | HZ1 | LYS | 31 | 18.128 | -2.591 | 24.857 |      |  |
| 1.00627.38 |     |     | H   |    |        |        |        |      |  |
| ATOM       | 414 | HZ2 | LYS | 31 | 19.500 | -3.480 | 25.318 |      |  |
| 1.00622.26 |     |     | H   |    |        |        |        |      |  |
| ATOM       | 415 | HZ3 | LYS | 31 | 19.677 | -2.026 | 24.458 |      |  |
| 1.00619.20 |     |     | H   |    |        |        |        |      |  |
| ATOM       | 416 | N   | THR | 32 | 13.162 | -0.517 | 28.632 | 1.00 |  |
| 15.51      |     |     | N   |    |        |        |        |      |  |
| ATOM       | 417 | CA  | THR | 32 | 11.885 | -0.417 | 29.325 | 1.00 |  |

|            |     |      |     |    |        |        |        |      |  |
|------------|-----|------|-----|----|--------|--------|--------|------|--|
| 22.44      |     |      | C   |    |        |        |        |      |  |
| ATOM       | 418 | C    | THR | 32 | 12.035 | -0.831 | 30.785 | 1.00 |  |
| 26.60      |     |      | C   |    |        |        |        |      |  |
| ATOM       | 419 | O    | THR | 32 | 12.536 | -1.915 | 31.088 | 1.00 |  |
| 57.43      |     |      | O   |    |        |        |        |      |  |
| ATOM       | 420 | CB   | THR | 32 | 10.847 | -1.309 | 28.640 | 1.00 |  |
| 56.28      |     |      | C   |    |        |        |        |      |  |
| ATOM       | 421 | CG2  | THR | 32 | 9.506  | -1.192 | 29.367 |      |  |
| 1.00102.70 |     |      |     | C  |        |        |        |      |  |
| ATOM       | 422 | OG1  | THR | 32 | 10.691 | -0.896 | 27.289 |      |  |
| 1.00111.17 |     |      |     | O  |        |        |        |      |  |
| ATOM       | 423 | HN   | THR | 32 | 13.287 | -1.209 | 27.951 | 1.00 |  |
| 18.79      |     |      | H   |    |        |        |        |      |  |
| ATOM       | 424 | HA   | THR | 32 | 11.545 | 0.607  | 29.287 | 1.00 |  |
| 19.67      |     |      | H   |    |        |        |        |      |  |
| ATOM       | 425 | HB   | THR | 32 | 11.178 | -2.334 | 28.667 | 1.00 |  |
| 84.25      |     |      | H   |    |        |        |        |      |  |
| ATOM       | 426 | HG1  | THR | 32 | 10.149 | -1.549 | 26.841 |      |  |
| 1.00205.03 |     |      |     | H  |        |        |        |      |  |
| ATOM       | 427 | HG21 | THR | 32 | 8.747  | -1.719 | 28.809 |      |  |
| 1.00220.71 |     |      |     | H  |        |        |        |      |  |
| ATOM       | 428 | HG22 | THR | 32 | 9.233  | -0.151 | 29.453 |      |  |
| 1.00174.67 |     |      |     | H  |        |        |        |      |  |
| ATOM       | 429 | HG23 | THR | 32 | 9.592  | -1.625 | 30.353 |      |  |
| 1.00217.44 |     |      |     | H  |        |        |        |      |  |
| ATOM       | 430 | N    | THR | 33 | 11.596 | 0.043  | 31.682 | 1.00 |  |
| 22.47      |     |      | N   |    |        |        |        |      |  |
| ATOM       | 431 | CA   | THR | 33 | 11.676 | -0.224 | 33.116 | 1.00 |  |
| 41.60      |     |      | C   |    |        |        |        |      |  |
| ATOM       | 432 | C    | THR | 33 | 10.566 | 0.483  | 33.845 | 1.00 |  |
| 38.03      |     |      | C   |    |        |        |        |      |  |
| ATOM       | 433 | O    | THR | 33 | 10.718 | 1.616  | 34.302 | 1.00 |  |
| 52.73      |     |      | O   |    |        |        |        |      |  |
| ATOM       | 434 | CB   | THR | 33 | 13.030 | 0.221  | 33.670 | 1.00 |  |
| 63.25      |     |      | C   |    |        |        |        |      |  |
| ATOM       | 435 | CG2  | THR | 33 | 14.131 | -0.698 | 33.140 |      |  |
| 1.00121.65 |     |      |     | C  |        |        |        |      |  |
| ATOM       | 436 | OG1  | THR | 33 | 13.289 | 1.558  | 33.264 | 1.00 |  |
| 96.20      |     |      | O   |    |        |        |        |      |  |
| ATOM       | 437 | HN   | THR | 33 | 11.207 | 0.888  | 31.373 | 1.00 |  |
| 23.82      |     |      | H   |    |        |        |        |      |  |
| ATOM       | 438 | HA   | THR | 33 | 11.548 | -1.274 | 33.297 | 1.00 |  |
| 67.12      |     |      | H   |    |        |        |        |      |  |
| ATOM       | 439 | HB   | THR | 33 | 13.011 | 0.169  | 34.748 |      |  |
| 1.00107.59 |     |      |     | H  |        |        |        |      |  |
| ATOM       | 440 | HG1  | THR | 33 | 14.162 | 1.581  | 32.865 |      |  |
| 1.00176.27 |     |      |     | H  |        |        |        |      |  |
| ATOM       | 441 | HG21 | THR | 33 | 15.051 | -0.499 | 33.670 |      |  |
| 1.00255.23 |     |      |     | H  |        |        |        |      |  |
| ATOM       | 442 | HG22 | THR | 33 | 14.277 | -0.515 | 32.086 |      |  |
| 1.00245.37 |     |      |     | H  |        |        |        |      |  |
| ATOM       | 443 | HG23 | THR | 33 | 13.845 | -1.728 | 33.290 |      |  |



|            |     |     |     |    |        |        |        |      |  |
|------------|-----|-----|-----|----|--------|--------|--------|------|--|
| 67.53      |     |     | C   |    |        |        |        |      |  |
| ATOM       | 470 | CG  | PHE | 36 | 7.332  | 2.224  | 27.755 | 1.00 |  |
| 86.71      |     |     | C   |    |        |        |        |      |  |
| ATOM       | 471 | CD1 | PHE | 36 | 6.226  | 1.860  | 28.532 |      |  |
| 1.00106.51 |     |     | C   |    |        |        |        |      |  |
| ATOM       | 472 | CD2 | PHE | 36 | 8.039  | 1.249  | 27.041 | 1.00 |  |
| 99.48      |     |     | C   |    |        |        |        |      |  |
| ATOM       | 473 | CE1 | PHE | 36 | 5.824  | 0.520  | 28.593 |      |  |
| 1.00134.48 |     |     | C   |    |        |        |        |      |  |
| ATOM       | 474 | CE2 | PHE | 36 | 7.637  | -0.090 | 27.101 |      |  |
| 1.00134.27 |     |     | C   |    |        |        |        |      |  |
| ATOM       | 475 | CZ  | PHE | 36 | 6.529  | -0.455 | 27.878 |      |  |
| 1.00149.48 |     |     | C   |    |        |        |        |      |  |
| ATOM       | 476 | HN  | PHE | 36 | 7.119  | 3.924  | 30.126 | 1.00 |  |
| 62.87      |     |     | H   |    |        |        |        |      |  |
| ATOM       | 477 | HA  | PHE | 36 | 9.562  | 3.232  | 28.745 | 1.00 |  |
| 28.53      |     |     | H   |    |        |        |        |      |  |
| ATOM       | 478 | HB1 | PHE | 36 | 8.218  | 3.866  | 26.739 | 1.00 |  |
| 73.56      |     |     | H   |    |        |        |        |      |  |
| ATOM       | 479 | HB2 | PHE | 36 | 6.896  | 4.308  | 27.810 | 1.00 |  |
| 88.42      |     |     | H   |    |        |        |        |      |  |
| ATOM       | 480 | HD1 | PHE | 36 | 5.683  | 2.613  | 29.085 |      |  |
| 1.00110.20 |     |     | H   |    |        |        |        |      |  |
| ATOM       | 481 | HD2 | PHE | 36 | 8.892  | 1.530  | 26.443 | 1.00 |  |
| 93.07      |     |     | H   |    |        |        |        |      |  |
| ATOM       | 482 | HE1 | PHE | 36 | 4.971  | 0.238  | 29.191 |      |  |
| 1.00155.06 |     |     | H   |    |        |        |        |      |  |
| ATOM       | 483 | HE2 | PHE | 36 | 8.181  | -0.842 | 26.550 |      |  |
| 1.00159.46 |     |     | H   |    |        |        |        |      |  |
| ATOM       | 484 | HZ  | PHE | 36 | 6.220  | -1.488 | 27.924 |      |  |
| 1.00183.25 |     |     | H   |    |        |        |        |      |  |
| ATOM       | 485 | N   | THR | 37 | 10.486 | 5.443  | 27.961 | 1.00 |  |
| 20.06      |     |     | N   |    |        |        |        |      |  |
| ATOM       | 486 | CA  | THR | 37 | 11.147 | 6.724  | 27.722 | 1.00 |  |
| 27.18      |     |     | C   |    |        |        |        |      |  |
| ATOM       | 487 | C   | THR | 37 | 11.489 | 6.863  | 26.244 | 1.00 |  |
| 41.87      |     |     | C   |    |        |        |        |      |  |
| ATOM       | 488 | O   | THR | 37 | 10.756 | 6.387  | 25.377 |      |  |
| 1.00169.86 |     |     | O   |    |        |        |        |      |  |
| ATOM       | 489 | CB  | THR | 37 | 12.428 | 6.813  | 28.555 | 1.00 |  |
| 26.52      |     |     | C   |    |        |        |        |      |  |
| ATOM       | 490 | CG2 | THR | 37 | 12.108 | 6.511  | 30.019 | 1.00 |  |
| 75.69      |     |     | C   |    |        |        |        |      |  |
| ATOM       | 491 | OG1 | THR | 37 | 13.373 | 5.869  | 28.071 | 1.00 |  |
| 81.95      |     |     | O   |    |        |        |        |      |  |
| ATOM       | 492 | HN  | THR | 37 | 10.902 | 4.627  | 27.617 | 1.00 |  |
| 18.47      |     |     | H   |    |        |        |        |      |  |
| ATOM       | 493 | HA  | THR | 37 | 10.488 | 7.533  | 28.005 | 1.00 |  |
| 38.80      |     |     | H   |    |        |        |        |      |  |
| ATOM       | 494 | HB  | THR | 37 | 12.840 | 7.807  | 28.479 | 1.00 |  |
| 81.60      |     |     | H   |    |        |        |        |      |  |
| ATOM       | 495 | HG1 | THR | 37 | 13.814 | 5.477  | 28.827 |      |  |

|            |     |      |     |     |    |        |        |        |      |
|------------|-----|------|-----|-----|----|--------|--------|--------|------|
| 1.00188.80 |     |      |     | H   |    |        |        |        |      |
| ATOM       | 496 | HG21 | THR |     | 37 | 11.717 | 5.509  | 30.103 |      |
| 1.00196.98 |     |      |     | H   |    |        |        |        |      |
| ATOM       | 497 | HG22 | THR |     | 37 | 11.372 | 7.217  | 30.380 |      |
| 1.00196.23 |     |      |     | H   |    |        |        |        |      |
| ATOM       | 498 | HG23 | THR |     | 37 | 13.008 | 6.597  | 30.609 |      |
| 1.00168.92 |     |      |     | H   |    |        |        |        |      |
| ATOM       | 499 | N    | GLU |     | 38 | 12.607 | 7.518  | 25.964 | 1.00 |
| 26.53      |     |      | N   |     |    |        |        |        |      |
| ATOM       | 500 | CA   | GLU |     | 38 | 13.041 | 7.717  | 24.585 | 1.00 |
| 30.29      |     |      | C   |     |    |        |        |        |      |
| ATOM       | 501 | C    | GLU |     | 38 | 14.526 | 8.064  | 24.528 | 1.00 |
| 25.39      |     |      | C   |     |    |        |        |        |      |
| ATOM       | 502 | O    | GLU |     | 38 | 15.085 | 8.604  | 25.482 | 1.00 |
| 51.60      |     |      | O   |     |    |        |        |        |      |
| ATOM       | 503 | CB   | GLU |     | 38 | 12.224 | 8.838  | 23.939 | 1.00 |
| 54.82      |     |      | C   |     |    |        |        |        |      |
| ATOM       | 504 | CG   | GLU |     | 38 | 12.438 | 10.142 | 24.711 |      |
| 1.00165.84 |     |      |     | C   |    |        |        |        |      |
| ATOM       | 505 | CD   | GLU |     | 38 | 11.538 | 11.236 | 24.149 |      |
| 1.00292.92 |     |      |     | C   |    |        |        |        |      |
| ATOM       | 506 | OE1  | GLU |     | 38 | 11.592 | 12.342 | 24.660 |      |
| 1.00414.19 |     |      |     | O   |    |        |        |        |      |
| ATOM       | 507 | OE2  | GLU |     | 38 | 10.805 | 10.951 | 23.215 |      |
| 1.00537.65 |     |      |     | O1- |    |        |        |        |      |
| ATOM       | 508 | HN   | GLU |     | 38 | 13.149 | 7.872  | 26.698 | 1.00 |
| 84.50      |     |      | H   |     |    |        |        |        |      |
| ATOM       | 509 | HA   | GLU |     | 38 | 12.875 | 6.805  | 24.032 | 1.00 |
| 32.15      |     |      | H   |     |    |        |        |        |      |
| ATOM       | 510 | HB1  | GLU |     | 38 | 11.177 | 8.579  | 23.960 |      |
| 1.00144.82 |     |      |     | H   |    |        |        |        |      |
| ATOM       | 511 | HB2  | GLU |     | 38 | 12.541 | 8.969  | 22.915 |      |
| 1.00106.49 |     |      |     | H   |    |        |        |        |      |
| ATOM       | 512 | HG1  | GLU |     | 38 | 13.471 | 10.447 | 24.619 |      |
| 1.00303.31 |     |      |     | H   |    |        |        |        |      |
| ATOM       | 513 | HG2  | GLU |     | 38 | 12.203 | 9.984  | 25.754 |      |
| 1.00323.99 |     |      |     | H   |    |        |        |        |      |
| ATOM       | 514 | N    | CYS |     | 39 | 15.153 | 7.758  | 23.397 | 1.00 |
| 15.84      |     |      | N   |     |    |        |        |        |      |
| ATOM       | 515 | CA   | CYS |     | 39 | 16.571 | 8.046  | 23.216 | 1.00 |
| 14.30      |     |      | C   |     |    |        |        |        |      |
| ATOM       | 516 | C    | CYS |     | 39 | 16.799 | 9.561  | 23.179 | 1.00 |
| 22.31      |     |      | C   |     |    |        |        |        |      |
| ATOM       | 517 | O    | CYS |     | 39 | 15.920 | 10.306 | 22.746 | 1.00 |
| 32.92      |     |      | O   |     |    |        |        |        |      |
| ATOM       | 518 | CB   | CYS |     | 39 | 17.054 | 7.416  | 21.906 | 1.00 |
| 18.08      |     |      | C   |     |    |        |        |        |      |
| ATOM       | 519 | SG   | CYS |     | 39 | 15.973 | 7.940  | 20.552 | 1.00 |
| 17.41      |     |      | S   |     |    |        |        |        |      |
| ATOM       | 520 | HN   | CYS |     | 39 | 14.653 | 7.335  | 22.669 | 1.00 |
| 24.87      |     |      | H   |     |    |        |        |        |      |
| ATOM       | 521 | HA   | CYS |     | 39 | 17.118 | 7.611  | 24.036 | 1.00 |

|            |     |     |     |    |        |        |        |      |
|------------|-----|-----|-----|----|--------|--------|--------|------|
| 14.60      |     |     | H   |    |        |        |        |      |
| ATOM       | 522 | HB1 | CYS | 39 | 17.028 | 6.339  | 21.991 | 1.00 |
| 27.71      |     |     | H   |    |        |        |        |      |
| ATOM       | 523 | HB2 | CYS | 39 | 18.064 | 7.735  | 21.702 | 1.00 |
| 34.91      |     |     | H   |    |        |        |        |      |
| ATOM       | 524 | N   | PRO | 40 | 17.942 | 10.038 | 23.618 | 1.00 |
| 27.27      |     |     | N   |    |        |        |        |      |
| ATOM       | 525 | CA  | PRO | 40 | 18.244 | 11.497 | 23.619 | 1.00 |
| 47.66      |     |     | C   |    |        |        |        |      |
| ATOM       | 526 | C   | PRO | 40 | 18.555 | 12.014 | 22.216 | 1.00 |
| 71.54      |     |     | C   |    |        |        |        |      |
| ATOM       | 527 | O   | PRO | 40 | 19.289 | 11.383 | 21.456 | 1.00 |
| 87.70      |     |     | O   |    |        |        |        |      |
| ATOM       | 528 | CB  | PRO | 40 | 19.465 | 11.607 | 24.538 | 1.00 |
| 53.85      |     |     | C   |    |        |        |        |      |
| ATOM       | 529 | CG  | PRO | 40 | 20.170 | 10.301 | 24.375 | 1.00 |
| 46.04      |     |     | C   |    |        |        |        |      |
| ATOM       | 530 | CD  | PRO | 40 | 19.073 | 9.255  | 24.154 | 1.00 |
| 25.70      |     |     | C   |    |        |        |        |      |
| ATOM       | 531 | HA  | PRO | 40 | 17.420 | 12.048 | 24.043 | 1.00 |
| 58.04      |     |     | H   |    |        |        |        |      |
| ATOM       | 532 | HB1 | PRO | 40 | 19.153 | 11.733 | 25.565 | 1.00 |
| 67.93      |     |     | H   |    |        |        |        |      |
| ATOM       | 533 | HB2 | PRO | 40 | 20.102 | 12.429 | 24.234 | 1.00 |
| 70.99      |     |     | H   |    |        |        |        |      |
| ATOM       | 534 | HG1 | PRO | 40 | 20.732 | 10.061 | 25.266 | 1.00 |
| 65.91      |     |     | H   |    |        |        |        |      |
| ATOM       | 535 | HG2 | PRO | 40 | 20.831 | 10.341 | 23.516 | 1.00 |
| 54.99      |     |     | H   |    |        |        |        |      |
| ATOM       | 536 | HD1 | PRO | 40 | 18.794 | 8.791  | 25.088 | 1.00 |
| 24.22      |     |     | H   |    |        |        |        |      |
| ATOM       | 537 | HD2 | PRO | 40 | 19.396 | 8.515  | 23.439 | 1.00 |
| 26.94      |     |     | H   |    |        |        |        |      |
| ATOM       | 538 | N   | GLY | 41 | 17.992 | 13.168 | 21.888 |      |
| 1.00105.24 |     |     |     | N  |        |        |        |      |
| ATOM       | 539 | CA  | GLY | 41 | 18.210 | 13.773 | 20.580 |      |
| 1.00147.55 |     |     |     | C  |        |        |        |      |
| ATOM       | 540 | C   | GLY | 41 | 19.679 | 14.134 | 20.383 |      |
| 1.00161.74 |     |     |     | C  |        |        |        |      |
| ATOM       | 541 | O   | GLY | 41 | 20.234 | 13.957 | 19.298 |      |
| 1.00244.37 |     |     |     | O  |        |        |        |      |
| ATOM       | 542 | HN  | GLY | 41 | 17.421 | 13.621 | 22.539 |      |
| 1.00121.79 |     |     |     | H  |        |        |        |      |
| ATOM       | 543 | HA1 | GLY | 41 | 17.615 | 14.670 | 20.499 |      |
| 1.00184.40 |     |     |     | H  |        |        |        |      |
| ATOM       | 544 | HA2 | GLY | 41 | 17.911 | 13.078 | 19.814 |      |
| 1.00157.34 |     |     |     | H  |        |        |        |      |
| ATOM       | 545 | N   | LEU | 42 | 20.299 | 14.643 | 21.444 |      |
| 1.00162.48 |     |     |     | N  |        |        |        |      |
| ATOM       | 546 | CA  | LEU | 42 | 21.710 | 15.039 | 21.400 |      |
| 1.00191.48 |     |     |     | C  |        |        |        |      |
| ATOM       | 547 | C   | LEU | 42 | 22.556 | 14.092 | 22.244 |      |

|            |     |      |     |    |        |        |        |  |
|------------|-----|------|-----|----|--------|--------|--------|--|
| 1.00166.66 |     |      |     | C  |        |        |        |  |
| ATOM       | 548 | O    | LEU | 42 | 22.113 | 13.608 | 23.286 |  |
| 1.00251.38 |     |      |     | O  |        |        |        |  |
| ATOM       | 549 | CB   | LEU | 42 | 21.862 | 16.465 | 21.936 |  |
| 1.00307.99 |     |      |     | C  |        |        |        |  |
| ATOM       | 550 | CG   | LEU | 42 | 20.951 | 17.420 | 21.156 |  |
| 1.00452.28 |     |      |     | C  |        |        |        |  |
| ATOM       | 551 | CD1  | LEU | 42 | 21.081 | 18.830 | 21.743 |  |
| 1.00681.24 |     |      |     | C  |        |        |        |  |
| ATOM       | 552 | CD2  | LEU | 42 | 21.353 | 17.440 | 19.672 |  |
| 1.00527.46 |     |      |     | C  |        |        |        |  |
| ATOM       | 553 | HN   | LEU | 42 | 19.796 | 14.759 | 22.276 |  |
| 1.00195.47 |     |      |     | H  |        |        |        |  |
| ATOM       | 554 | HA   | LEU | 42 | 22.068 | 15.010 | 20.380 |  |
| 1.00229.77 |     |      |     | H  |        |        |        |  |
| ATOM       | 555 | HB1  | LEU | 42 | 22.889 | 16.782 | 21.825 |  |
| 1.00342.49 |     |      |     | H  |        |        |        |  |
| ATOM       | 556 | HB2  | LEU | 42 | 21.593 | 16.485 | 22.983 |  |
| 1.00335.33 |     |      |     | H  |        |        |        |  |
| ATOM       | 557 | HG   | LEU | 42 | 19.926 | 17.089 | 21.250 |  |
| 1.00427.79 |     |      |     | H  |        |        |        |  |
| ATOM       | 558 | HD11 | LEU | 42 | 20.608 | 18.860 | 22.713 |  |
| 1.00909.71 |     |      |     | H  |        |        |        |  |
| ATOM       | 559 | HD12 | LEU | 42 | 20.598 | 19.538 | 21.086 |  |
| 1.00706.80 |     |      |     | H  |        |        |        |  |
| ATOM       | 560 | HD13 | LEU | 42 | 22.125 | 19.084 | 21.842 |  |
| 1.00858.82 |     |      |     | H  |        |        |        |  |
| ATOM       | 561 | HD21 | LEU | 42 | 21.008 | 18.357 | 19.213 |  |
| 1.00631.69 |     |      |     | H  |        |        |        |  |
| ATOM       | 562 | HD22 | LEU | 42 | 20.902 | 16.600 | 19.165 |  |
| 1.00628.06 |     |      |     | H  |        |        |        |  |
| ATOM       | 563 | HD23 | LEU | 42 | 22.429 | 17.377 | 19.584 |  |
| 1.00656.75 |     |      |     | H  |        |        |        |  |
| ATOM       | 564 | N    | THR | 43 | 23.777 | 13.831 | 21.787 |  |
| 1.00178.52 |     |      |     | N  |        |        |        |  |
| ATOM       | 565 | CA   | THR | 43 | 24.679 | 12.940 | 22.509 |  |
| 1.00240.84 |     |      |     | C  |        |        |        |  |
| ATOM       | 566 | C    | THR | 43 | 25.145 | 13.598 | 23.814 |  |
| 1.00372.31 |     |      |     | C  |        |        |        |  |
| ATOM       | 567 | O    | THR | 43 | 25.250 | 14.822 | 23.886 |  |
| 1.00500.13 |     |      |     | O  |        |        |        |  |
| ATOM       | 568 | CB   | THR | 43 | 25.887 | 12.619 | 21.623 |  |
| 1.00354.13 |     |      |     | C  |        |        |        |  |
| ATOM       | 569 | CG2  | THR | 43 | 25.417 | 11.899 | 20.359 |  |
| 1.00463.04 |     |      |     | C  |        |        |        |  |
| ATOM       | 570 | OG1  | THR | 43 | 26.543 | 13.828 | 21.266 |  |
| 1.00508.50 |     |      |     | O  |        |        |        |  |
| ATOM       | 571 | HN   | THR | 43 | 24.075 | 14.246 | 20.951 |  |
| 1.00229.59 |     |      |     | H  |        |        |        |  |
| ATOM       | 572 | HA   | THR | 43 | 24.153 | 12.026 | 22.727 |  |
| 1.00249.90 |     |      |     | H  |        |        |        |  |
| ATOM       | 573 | HB   | THR | 43 | 26.572 | 11.984 | 22.159 |  |

|            |     |      |     |   |    |        |        |        |
|------------|-----|------|-----|---|----|--------|--------|--------|
| 1.00481.58 |     |      |     | H |    |        |        |        |
| ATOM       | 574 | HG1  | THR | H | 43 | 25.914 | 14.546 | 21.363 |
| 1.00624.31 |     |      |     | H |    |        |        |        |
| ATOM       | 575 | HG21 | THR | H | 43 | 25.105 | 10.897 | 20.610 |
| 1.00650.95 |     |      |     | H |    |        |        |        |
| ATOM       | 576 | HG22 | THR | H | 43 | 26.228 | 11.856 | 19.647 |
| 1.00580.73 |     |      |     | H |    |        |        |        |
| ATOM       | 577 | HG23 | THR | H | 43 | 24.586 | 12.437 | 19.925 |
| 1.00571.99 |     |      |     | H |    |        |        |        |
| ATOM       | 578 | N    | PRO | N | 44 | 25.423 | 12.825 | 24.845 |
| 1.00488.39 |     |      |     | N |    |        |        |        |
| ATOM       | 579 | CA   | PRO | N | 44 | 25.880 | 13.376 | 26.158 |
| 1.00760.13 |     |      |     | C |    |        |        |        |
| ATOM       | 580 | C    | PRO | C | 44 | 27.335 | 13.845 | 26.119 |
| 1.00735.36 |     |      |     | C |    |        |        |        |
| ATOM       | 581 | O    | PRO | C | 44 | 27.815 | 14.484 | 27.054 |
| 1.00999.99 |     |      |     | O |    |        |        |        |
| ATOM       | 582 | CB   | PRO | O | 44 | 25.702 | 12.193 | 27.116 |
| 1.00999.99 |     |      |     | C |    |        |        |        |
| ATOM       | 583 | CG   | PRO | C | 44 | 25.908 | 10.989 | 26.261 |
| 1.00856.94 |     |      |     | C |    |        |        |        |
| ATOM       | 584 | CD   | PRO | C | 44 | 25.336 | 11.348 | 24.886 |
| 1.00548.09 |     |      |     | C |    |        |        |        |
| ATOM       | 585 | HA   | PRO | C | 44 | 25.238 | 14.187 | 26.465 |
| 1.00939.00 |     |      |     | H |    |        |        |        |
| ATOM       | 586 | HB1  | PRO | H | 44 | 24.703 | 12.187 | 27.527 |
| 1.00999.99 |     |      |     | H |    |        |        |        |
| ATOM       | 587 | HB2  | PRO | H | 44 | 26.438 | 12.231 | 27.913 |
| 1.00999.99 |     |      |     | H |    |        |        |        |
| ATOM       | 588 | HG1  | PRO | H | 44 | 25.380 | 10.140 | 26.668 |
| 1.00999.99 |     |      |     | H |    |        |        |        |
| ATOM       | 589 | HG2  | PRO | H | 44 | 26.967 | 10.767 | 26.181 |
| 1.00853.53 |     |      |     | H |    |        |        |        |
| ATOM       | 590 | HD1  | PRO | H | 44 | 24.306 | 11.034 | 24.810 |
| 1.00602.45 |     |      |     | H |    |        |        |        |
| ATOM       | 591 | HD2  | PRO | H | 44 | 25.932 | 10.905 | 24.101 |
| 1.00463.32 |     |      |     | H |    |        |        |        |
| ATOM       | 592 | N    | ILE | N | 45 | 28.035 | 13.512 | 25.039 |
| 1.00518.33 |     |      |     | N |    |        |        |        |
| ATOM       | 593 | CA   | ILE | N | 45 | 29.436 | 13.898 | 24.906 |
| 1.00582.79 |     |      |     | C |    |        |        |        |
| ATOM       | 594 | C    | ILE | C | 45 | 29.603 | 15.400 | 25.119 |
| 1.00795.93 |     |      |     | C |    |        |        |        |
| ATOM       | 595 | O    | ILE | C | 45 | 30.638 | 15.855 | 25.609 |
| 1.00898.75 |     |      |     | O |    |        |        |        |
| ATOM       | 596 | CB   | ILE | O | 45 | 29.958 | 13.509 | 23.518 |
| 1.00474.41 |     |      |     | C |    |        |        |        |
| ATOM       | 597 | CG1  | ILE | C | 45 | 31.482 | 13.669 | 23.479 |
| 1.00516.90 |     |      |     | C |    |        |        |        |
| ATOM       | 598 | CG2  | ILE | C | 45 | 29.323 | 14.412 | 22.453 |
| 1.00760.75 |     |      |     | C |    |        |        |        |
| ATOM       | 599 | CD1  | ILE | C | 45 | 32.027 | 13.045 | 22.193 |



|            |     |      |     |   |    |        |        |        |
|------------|-----|------|-----|---|----|--------|--------|--------|
| 1.00566.81 |     |      |     | C |    |        |        |        |
| ATOM       | 600 | HN   | ILE |   | 45 | 27.607 | 12.995 | 24.326 |
| 1.00395.72 |     |      |     | H |    |        |        |        |
| ATOM       | 601 | HA   | ILE |   | 45 | 30.010 | 13.372 | 25.653 |
| 1.00711.06 |     |      |     | H |    |        |        |        |
| ATOM       | 602 | HB   | ILE |   | 45 | 29.697 | 12.481 | 23.314 |
| 1.00477.81 |     |      |     | H |    |        |        |        |
| ATOM       | 603 | HG11 | ILE |   | 45 | 31.919 | 13.170 | 24.331 |
| 1.00624.28 |     |      |     | H |    |        |        |        |
| ATOM       | 604 | HG12 | ILE |   | 45 | 31.734 | 14.719 | 23.506 |
| 1.00744.84 |     |      |     | H |    |        |        |        |
| ATOM       | 605 | HG21 | ILE |   | 45 | 29.813 | 15.375 | 22.453 |
| 1.00920.57 |     |      |     | H |    |        |        |        |
| ATOM       | 606 | HG22 | ILE |   | 45 | 28.275 | 14.545 | 22.671 |
| 1.00999.99 |     |      |     | H |    |        |        |        |
| ATOM       | 607 | HG23 | ILE |   | 45 | 29.432 | 13.953 | 21.481 |
| 1.00865.46 |     |      |     | H |    |        |        |        |
| ATOM       | 608 | HD11 | ILE |   | 45 | 31.788 | 11.991 | 22.175 |
| 1.00658.89 |     |      |     | H |    |        |        |        |
| ATOM       | 609 | HD12 | ILE |   | 45 | 33.099 | 13.171 | 22.159 |
| 1.00734.30 |     |      |     | H |    |        |        |        |
| ATOM       | 610 | HD13 | ILE |   | 45 | 31.579 | 13.530 | 21.338 |
| 1.00675.84 |     |      |     | H |    |        |        |        |
| ATOM       | 611 | N    | ALA |   | 46 | 28.582 | 16.164 | 24.752 |
| 1.00999.99 |     |      |     | N |    |        |        |        |
| ATOM       | 612 | CA   | ALA |   | 46 | 28.628 | 17.613 | 24.908 |
| 1.00999.99 |     |      |     | C |    |        |        |        |
| ATOM       | 613 | C    | ALA |   | 46 | 27.240 | 18.219 | 24.716 |
| 1.00999.99 |     |      |     | C |    |        |        |        |
| ATOM       | 614 | CB   | ALA |   | 46 | 29.596 | 18.219 | 23.891 |
| 1.00999.99 |     |      |     | C |    |        |        |        |
| ATOM       | 615 | OT1  | ALA |   | 46 | 26.302 | 17.458 | 24.545 |
| 1.00999.99 |     |      |     | O |    |        |        |        |
| ATOM       | 616 | OT2  | ALA |   | 46 | 27.137 | 19.433 | 24.743 |
| 1.00999.99 |     |      |     | O |    |        |        |        |
| ATOM       | 617 | HN   | ALA |   | 46 | 27.781 | 15.746 | 24.368 |
| 1.00999.99 |     |      |     | H |    |        |        |        |
| ATOM       | 618 | HA   | ALA |   | 46 | 28.976 | 17.847 | 25.903 |
| 1.00999.99 |     |      |     | H |    |        |        |        |
| ATOM       | 619 | HB1  | ALA |   | 46 | 30.502 | 17.632 | 23.864 |
| 1.00999.99 |     |      |     | H |    |        |        |        |
| ATOM       | 620 | HB2  | ALA |   | 46 | 29.832 | 19.233 | 24.177 |
| 1.00999.99 |     |      |     | H |    |        |        |        |
| ATOM       | 621 | HB3  | ALA |   | 46 | 29.137 | 18.217 | 22.914 |
| 1.00999.99 |     |      |     | H |    |        |        |        |
| ENDMDL     |     |      |     |   |    |        |        |        |
| TER        |     |      |     |   |    |        |        |        |
| MODEL      |     | 3    |     |   |    |        |        |        |
| ATOM       | 1   | N    | GLY |   | 1  | 26.201 | -3.594 | 19.145 |
| 1.00999.99 |     |      |     | N |    |        |        |        |
| ATOM       | 2   | CA   | GLY |   | 1  | 24.825 | -3.158 | 19.516 |
| 1.00999.99 |     |      |     | C |    |        |        |        |

|            |    |      |     |   |        |        |        |
|------------|----|------|-----|---|--------|--------|--------|
| ATOM       | 3  | C    | GLY | 1 | 24.307 | -2.166 | 18.480 |
| 1.00999.99 |    |      | C   |   |        |        |        |
| ATOM       | 4  | O    | GLY | 1 | 23.805 | -1.097 | 18.828 |
| 1.00999.99 |    |      | O   |   |        |        |        |
| ATOM       | 5  | HA1  | GLY | 1 | 24.845 | -2.684 | 20.485 |
| 1.00999.99 |    |      | H   |   |        |        |        |
| ATOM       | 6  | HA2  | GLY | 1 | 24.172 | -4.020 | 19.549 |
| 1.00999.99 |    |      | H   |   |        |        |        |
| ATOM       | 7  | HT1  | GLY | 1 | 26.784 | -2.759 | 18.935 |
| 1.00999.99 |    |      | H   |   |        |        |        |
| ATOM       | 8  | HT2  | GLY | 1 | 26.155 | -4.206 | 18.305 |
| 1.00999.99 |    |      | H   |   |        |        |        |
| ATOM       | 9  | HT3  | GLY | 1 | 26.623 | -4.119 | 19.936 |
| 1.00999.99 |    |      | H   |   |        |        |        |
| ATOM       | 10 | N    | LEU | 2 | 24.434 | -2.527 | 17.208 |
| 1.00999.99 |    |      | N   |   |        |        |        |
| ATOM       | 11 | CA   | LEU | 2 | 23.976 | -1.659 | 16.128 |
| 1.00895.59 |    |      | C   |   |        |        |        |
| ATOM       | 12 | C    | LEU | 2 | 22.451 | -1.629 | 16.084 |
| 1.00532.27 |    |      | C   |   |        |        |        |
| ATOM       | 13 | O    | LEU | 2 | 21.790 | -2.600 | 16.451 |
| 1.00625.21 |    |      | O   |   |        |        |        |
| ATOM       | 14 | CB   | LEU | 2 | 24.517 | -2.161 | 14.787 |
| 1.00999.99 |    |      | C   |   |        |        |        |
| ATOM       | 15 | CG   | LEU | 2 | 26.050 | -2.195 | 14.820 |
| 1.00999.99 |    |      | C   |   |        |        |        |
| ATOM       | 16 | CD1  | LEU | 2 | 26.567 | -2.786 | 13.504 |
| 1.00999.99 |    |      | C   |   |        |        |        |
| ATOM       | 17 | CD2  | LEU | 2 | 26.611 | -0.771 | 15.003 |
| 1.00999.99 |    |      | C   |   |        |        |        |
| ATOM       | 18 | HN   | LEU | 2 | 24.842 | -3.391 | 16.990 |
| 1.00999.99 |    |      | H   |   |        |        |        |
| ATOM       | 19 | HA   | LEU | 2 | 24.338 | -0.660 | 16.303 |
| 1.00890.87 |    |      | H   |   |        |        |        |
| ATOM       | 20 | HB1  | LEU | 2 | 24.192 | -1.499 | 13.999 |
| 1.00924.07 |    |      | H   |   |        |        |        |
| ATOM       | 21 | HB2  | LEU | 2 | 24.140 | -3.156 | 14.598 |
| 1.00999.99 |    |      | H   |   |        |        |        |
| ATOM       | 22 | HG   | LEU | 2 | 26.375 | -2.818 | 15.642 |
| 1.00999.99 |    |      | H   |   |        |        |        |
| ATOM       | 23 | HD11 | LEU | 2 | 26.220 | -3.803 | 13.405 |
| 1.00999.99 |    |      | H   |   |        |        |        |
| ATOM       | 24 | HD12 | LEU | 2 | 27.647 | -2.773 | 13.504 |
| 1.00999.99 |    |      | H   |   |        |        |        |
| ATOM       | 25 | HD13 | LEU | 2 | 26.200 | -2.197 | 12.677 |
| 1.00999.99 |    |      | H   |   |        |        |        |
| ATOM       | 26 | HD21 | LEU | 2 | 26.632 | -0.525 | 16.055 |
| 1.00999.99 |    |      | H   |   |        |        |        |
| ATOM       | 27 | HD22 | LEU | 2 | 25.985 | -0.061 | 14.481 |
| 1.00999.99 |    |      | H   |   |        |        |        |
| ATOM       | 28 | HD23 | LEU | 2 | 27.616 | -0.719 | 14.606 |
| 1.00999.99 |    |      | H   |   |        |        |        |

|            |    |     |     |   |        |        |        |      |
|------------|----|-----|-----|---|--------|--------|--------|------|
| ATOM       | 29 | N   | CYS | 3 | 21.898 | -0.503 | 15.637 |      |
| 1.00271.28 |    |     | N   |   |        |        |        |      |
| ATOM       | 30 | CA  | CYS | 3 | 20.447 | -0.355 | 15.555 |      |
| 1.00104.50 |    |     | C   |   |        |        |        |      |
| ATOM       | 31 | C   | CYS | 3 | 19.917 | -0.937 | 14.249 | 1.00 |
| 90.98      |    |     | C   |   |        |        |        |      |
| ATOM       | 32 | O   | CYS | 3 | 20.058 | -0.335 | 13.186 |      |
| 1.00207.28 |    |     | O   |   |        |        |        |      |
| ATOM       | 33 | CB  | CYS | 3 | 20.070 | 1.127  | 15.635 | 1.00 |
| 37.83      |    |     | C   |   |        |        |        |      |
| ATOM       | 34 | SG  | CYS | 3 | 20.561 | 1.791  | 17.245 | 1.00 |
| 81.56      |    |     | S   |   |        |        |        |      |
| ATOM       | 35 | HN  | CYS | 3 | 22.475 | 0.239  | 15.361 |      |
| 1.00296.55 |    |     | H   |   |        |        |        |      |
| ATOM       | 36 | HA  | CYS | 3 | 19.990 | -0.873 | 16.384 |      |
| 1.00166.45 |    |     | H   |   |        |        |        |      |
| ATOM       | 37 | HB1 | CYS | 3 | 19.003 | 1.233  | 15.512 | 1.00 |
| 40.38      |    |     | H   |   |        |        |        |      |
| ATOM       | 38 | HB2 | CYS | 3 | 20.578 | 1.670  | 14.853 | 1.00 |
| 98.45      |    |     | H   |   |        |        |        |      |
| ATOM       | 39 | N   | SER | 4 | 19.294 | -2.107 | 14.341 | 1.00 |
| 85.31      |    |     | N   |   |        |        |        |      |
| ATOM       | 40 | CA  | SER | 4 | 18.733 | -2.757 | 13.163 | 1.00 |
| 92.94      |    |     | C   |   |        |        |        |      |
| ATOM       | 41 | C   | SER | 4 | 17.648 | -1.881 | 12.564 | 1.00 |
| 67.37      |    |     | C   |   |        |        |        |      |
| ATOM       | 42 | O   | SER | 4 | 17.543 | -1.731 | 11.347 |      |
| 1.00102.28 |    |     | O   |   |        |        |        |      |
| ATOM       | 43 | CB  | SER | 4 | 18.103 | -4.092 | 13.549 |      |
| 1.00123.83 |    |     | C   |   |        |        |        |      |
| ATOM       | 44 | OG  | SER | 4 | 17.674 | -4.766 | 12.374 |      |
| 1.00178.89 |    |     | O   |   |        |        |        |      |
| ATOM       | 45 | HN  | SER | 4 | 19.204 | -2.538 | 15.217 |      |
| 1.00163.03 |    |     | H   |   |        |        |        |      |
| ATOM       | 46 | HA  | SER | 4 | 19.509 | -2.924 | 12.434 |      |
| 1.00129.78 |    |     | H   |   |        |        |        |      |
| ATOM       | 47 | HB1 | SER | 4 | 17.251 | -3.905 | 14.195 |      |
| 1.00105.26 |    |     | H   |   |        |        |        |      |
| ATOM       | 48 | HB2 | SER | 4 | 18.823 | -4.702 | 14.070 |      |
| 1.00156.87 |    |     | H   |   |        |        |        |      |
| ATOM       | 49 | HG  | SER | 4 | 18.434 | -5.213 | 11.992 |      |
| 1.00218.16 |    |     | H   |   |        |        |        |      |
| ATOM       | 50 | N   | GLU | 5 | 16.826 | -1.325 | 13.448 | 1.00 |
| 41.67      |    |     | N   |   |        |        |        |      |
| ATOM       | 51 | CA  | GLU | 5 | 15.715 | -0.476 | 13.046 | 1.00 |
| 41.21      |    |     | C   |   |        |        |        |      |
| ATOM       | 52 | C   | GLU | 5 | 15.537 | 0.666  | 14.040 | 1.00 |
| 41.92      |    |     | C   |   |        |        |        |      |
| ATOM       | 53 | O   | GLU | 5 | 16.369 | 0.864  | 14.924 | 1.00 |
| 74.72      |    |     | O   |   |        |        |        |      |
| ATOM       | 54 | CB  | GLU | 5 | 14.442 | -1.315 | 12.987 | 1.00 |
| 49.24      |    |     | C   |   |        |        |        |      |

|            |    |      |     |   |        |        |        |      |
|------------|----|------|-----|---|--------|--------|--------|------|
| ATOM       | 55 | CG   | GLU | 5 | 14.181 | -1.911 | 14.362 | 1.00 |
| 55.48      |    |      | C   |   |        |        |        |      |
| ATOM       | 56 | CD   | GLU | 5 | 13.071 | -2.955 | 14.280 | 1.00 |
| 92.06      |    |      | C   |   |        |        |        |      |
| ATOM       | 57 | OE1  | GLU | 5 | 12.569 | -3.171 | 13.189 |      |
| 1.00206.49 |    |      | O   |   |        |        |        |      |
| ATOM       | 58 | OE2  | GLU | 5 | 12.741 | -3.522 | 15.308 |      |
| 1.00197.24 |    |      | O1- |   |        |        |        |      |
| ATOM       | 59 | HN   | GLU | 5 | 16.963 | -1.507 | 14.402 | 1.00 |
| 45.52      |    |      | H   |   |        |        |        |      |
| ATOM       | 60 | HA   | GLU | 5 | 15.907 | -0.069 | 12.073 | 1.00 |
| 60.63      |    |      | H   |   |        |        |        |      |
| ATOM       | 61 | HB1  | GLU | 5 | 14.566 | -2.110 | 12.268 | 1.00 |
| 61.59      |    |      | H   |   |        |        |        |      |
| ATOM       | 62 | HB2  | GLU | 5 | 13.615 | -0.694 | 12.699 | 1.00 |
| 63.66      |    |      | H   |   |        |        |        |      |
| ATOM       | 63 | HG1  | GLU | 5 | 13.884 | -1.127 | 15.043 | 1.00 |
| 58.03      |    |      | H   |   |        |        |        |      |
| ATOM       | 64 | HG2  | GLU | 5 | 15.086 | -2.371 | 14.719 | 1.00 |
| 57.77      |    |      | H   |   |        |        |        |      |
| ATOM       | 65 | N    | ASN | 6 | 14.449 | 1.415  | 13.893 | 1.00 |
| 50.73      |    |      | N   |   |        |        |        |      |
| ATOM       | 66 | CA   | ASN | 6 | 14.183 | 2.533  | 14.790 | 1.00 |
| 71.04      |    |      | C   |   |        |        |        |      |
| ATOM       | 67 | C    | ASN | 6 | 14.064 | 2.039  | 16.228 | 1.00 |
| 65.17      |    |      | C   |   |        |        |        |      |
| ATOM       | 68 | O    | ASN | 6 | 14.548 | 2.684  | 17.160 | 1.00 |
| 94.86      |    |      | O   |   |        |        |        |      |
| ATOM       | 69 | CB   | ASN | 6 | 12.889 | 3.238  | 14.380 | 1.00 |
| 94.83      |    |      | C   |   |        |        |        |      |
| ATOM       | 70 | CG   | ASN | 6 | 13.103 | 4.003  | 13.079 |      |
| 1.00160.94 |    |      | C   |   |        |        |        |      |
| ATOM       | 71 | ND2  | ASN | 6 | 12.071 | 4.337  | 12.353 |      |
| 1.00244.88 |    |      | N   |   |        |        |        |      |
| ATOM       | 72 | OD1  | ASN | 6 | 14.238 | 4.307  | 12.716 |      |
| 1.00219.73 |    |      | O   |   |        |        |        |      |
| ATOM       | 73 | HN   | ASN | 6 | 13.817 | 1.213  | 13.171 | 1.00 |
| 72.81      |    |      | H   |   |        |        |        |      |
| ATOM       | 74 | HA   | ASN | 6 | 15.000 | 3.236  | 14.726 | 1.00 |
| 96.02      |    |      | H   |   |        |        |        |      |
| ATOM       | 75 | HB1  | ASN | 6 | 12.596 | 3.927  | 15.157 |      |
| 1.00111.09 |    |      | H   |   |        |        |        |      |
| ATOM       | 76 | HB2  | ASN | 6 | 12.110 | 2.502  | 14.241 | 1.00 |
| 98.13      |    |      | H   |   |        |        |        |      |
| ATOM       | 77 | HD21 | ASN | 6 | 11.167 | 4.096  | 12.645 |      |
| 1.00272.43 |    |      | H   |   |        |        |        |      |
| ATOM       | 78 | HD22 | ASN | 6 | 12.201 | 4.829  | 11.516 |      |
| 1.00336.78 |    |      | H   |   |        |        |        |      |
| ATOM       | 79 | N    | GLY | 7 | 13.421 | 0.885  | 16.402 | 1.00 |
| 51.80      |    |      | N   |   |        |        |        |      |
| ATOM       | 80 | CA   | GLY | 7 | 13.240 | 0.291  | 17.730 | 1.00 |
| 71.47      |    |      | C   |   |        |        |        |      |

|            |     |     |     |   |        |        |        |      |
|------------|-----|-----|-----|---|--------|--------|--------|------|
| ATOM       | 81  | C   | GLY | 7 | 13.916 | -1.071 | 17.805 | 1.00 |
| 41.04      |     |     | C   |   |        |        |        |      |
| ATOM       | 82  | O   | GLY | 7 | 13.260 | -2.094 | 17.998 | 1.00 |
| 44.54      |     |     | O   |   |        |        |        |      |
| ATOM       | 83  | HN  | GLY | 7 | 13.062 | 0.416  | 15.619 | 1.00 |
| 45.49      |     |     | H   |   |        |        |        |      |
| ATOM       | 84  | HA1 | GLY | 7 | 12.191 | 0.168  | 17.920 |      |
| 1.00103.52 |     |     |     |   |        |        |        | H    |
| ATOM       | 85  | HA2 | GLY | 7 | 13.665 | 0.940  | 18.485 |      |
| 1.00108.67 |     |     |     |   |        |        |        | H    |
| ATOM       | 86  | N   | ASP | 8 | 15.232 | -1.072 | 17.644 | 1.00 |
| 27.00      |     |     | N   |   |        |        |        |      |
| ATOM       | 87  | CA  | ASP | 8 | 15.997 | -2.313 | 17.687 | 1.00 |
| 14.15      |     |     | C   |   |        |        |        |      |
| ATOM       | 88  | C   | ASP | 8 | 15.841 | -2.997 | 19.039 | 1.00 |
| 9.37       |     |     | C   |   |        |        |        |      |
| ATOM       | 89  | O   | ASP | 8 | 15.601 | -4.203 | 19.114 | 1.00 |
| 14.61      |     |     | O   |   |        |        |        |      |
| ATOM       | 90  | CB  | ASP | 8 | 17.476 | -2.025 | 17.425 | 1.00 |
| 15.06      |     |     | C   |   |        |        |        |      |
| ATOM       | 91  | CG  | ASP | 8 | 18.262 | -3.331 | 17.391 | 1.00 |
| 21.22      |     |     | C   |   |        |        |        |      |
| ATOM       | 92  | OD1 | ASP | 8 | 17.680 | -4.357 | 17.697 |      |
| 1.00119.56 |     |     |     |   |        |        |        | O    |
| ATOM       | 93  | OD2 | ASP | 8 | 19.436 | -3.284 | 17.060 |      |
| 1.00133.27 |     |     |     |   |        |        |        | O1-  |
| ATOM       | 94  | HN  | ASP | 8 | 15.693 | -0.226 | 17.488 | 1.00 |
| 35.63      |     |     | H   |   |        |        |        |      |
| ATOM       | 95  | HA  | ASP | 8 | 15.631 | -2.975 | 16.921 | 1.00 |
| 20.92      |     |     | H   |   |        |        |        |      |
| ATOM       | 96  | HB1 | ASP | 8 | 17.862 | -1.396 | 18.212 | 1.00 |
| 29.39      |     |     | H   |   |        |        |        |      |
| ATOM       | 97  | HB2 | ASP | 8 | 17.579 | -1.519 | 16.476 | 1.00 |
| 44.14      |     |     | H   |   |        |        |        |      |
| ATOM       | 98  | N   | CYS | 9 | 15.976 | -2.220 | 20.104 | 1.00 |
| 5.93       |     |     | N   |   |        |        |        |      |
| ATOM       | 99  | CA  | CYS | 9 | 15.843 | -2.762 | 21.450 | 1.00 |
| 7.54       |     |     | C   |   |        |        |        |      |
| ATOM       | 100 | C   | CYS | 9 | 14.431 | -3.297 | 21.668 | 1.00 |
| 14.60      |     |     | C   |   |        |        |        |      |
| ATOM       | 101 | O   | CYS | 9 | 14.237 | -4.366 | 22.245 | 1.00 |
| 25.78      |     |     | O   |   |        |        |        |      |
| ATOM       | 102 | CB  | CYS | 9 | 16.152 | -1.680 | 22.476 | 1.00 |
| 6.63       |     |     | C   |   |        |        |        |      |
| ATOM       | 103 | SG  | CYS | 9 | 17.917 | -1.330 | 22.415 | 1.00 |
| 10.91      |     |     | S   |   |        |        |        |      |
| ATOM       | 104 | HN  | CYS | 9 | 16.162 | -1.268 | 19.980 | 1.00 |
| 6.51       |     |     | H   |   |        |        |        |      |
| ATOM       | 105 | HA  | CYS | 9 | 16.556 | -3.559 | 21.575 | 1.00 |
| 11.12      |     |     | H   |   |        |        |        |      |
| ATOM       | 106 | HB1 | CYS | 9 | 15.891 | -2.028 | 23.463 | 1.00 |
| 11.28      |     |     | H   |   |        |        |        |      |

|            |     |     |     |    |        |        |        |      |
|------------|-----|-----|-----|----|--------|--------|--------|------|
| ATOM       | 107 | HB2 | CYS | 9  | 15.593 | -0.786 | 22.245 | 1.00 |
| 5.04       |     | H   |     |    |        |        |        |      |
| ATOM       | 108 | N   | ALA | 10 | 13.456 | -2.539 | 21.183 | 1.00 |
| 16.26      |     | N   |     |    |        |        |        |      |
| ATOM       | 109 | CA  | ALA | 10 | 12.053 | -2.919 | 21.301 | 1.00 |
| 32.04      |     | C   |     |    |        |        |        |      |
| ATOM       | 110 | C   | ALA | 10 | 11.193 | -1.966 | 20.473 | 1.00 |
| 45.47      |     | C   |     |    |        |        |        |      |
| ATOM       | 111 | O   | ALA | 10 | 11.649 | -0.890 | 20.087 |      |
| 1.00119.04 |     | O   |     |    |        |        |        |      |
| ATOM       | 112 | CB  | ALA | 10 | 11.613 | -2.889 | 22.772 | 1.00 |
| 30.10      |     | C   |     |    |        |        |        |      |
| ATOM       | 113 | HN  | ALA | 10 | 13.686 | -1.704 | 20.729 | 1.00 |
| 12.81      |     | H   |     |    |        |        |        |      |
| ATOM       | 114 | HA  | ALA | 10 | 11.929 | -3.922 | 20.918 | 1.00 |
| 47.14      |     | H   |     |    |        |        |        |      |
| ATOM       | 115 | HB1 | ALA | 10 | 10.772 | -3.555 | 22.909 | 1.00 |
| 84.37      |     | H   |     |    |        |        |        |      |
| ATOM       | 116 | HB2 | ALA | 10 | 11.323 | -1.886 | 23.048 |      |
| 1.00118.20 |     | H   |     |    |        |        |        |      |
| ATOM       | 117 | HB3 | ALA | 10 | 12.430 | -3.212 | 23.398 |      |
| 1.00117.32 |     | H   |     |    |        |        |        |      |
| ATOM       | 118 | N   | ALA | 11 | 9.953  | -2.360 | 20.198 | 1.00 |
| 30.62      |     | N   |     |    |        |        |        |      |
| ATOM       | 119 | CA  | ALA | 11 | 9.066  | -1.514 | 19.409 | 1.00 |
| 35.24      |     | C   |     |    |        |        |        |      |
| ATOM       | 120 | C   | ALA | 11 | 8.855  | -0.171 | 20.103 | 1.00 |
| 22.78      |     | C   |     |    |        |        |        |      |
| ATOM       | 121 | O   | ALA | 11 | 8.935  | 0.884  | 19.472 | 1.00 |
| 53.33      |     | O   |     |    |        |        |        |      |
| ATOM       | 122 | CB  | ALA | 11 | 7.717  | -2.209 | 19.216 | 1.00 |
| 60.49      |     | C   |     |    |        |        |        |      |
| ATOM       | 123 | HN  | ALA | 11 | 9.635  | -3.227 | 20.526 | 1.00 |
| 50.37      |     | H   |     |    |        |        |        |      |
| ATOM       | 124 | HA  | ALA | 11 | 9.511  | -1.343 | 18.442 | 1.00 |
| 41.70      |     | H   |     |    |        |        |        |      |
| ATOM       | 125 | HB1 | ALA | 11 | 7.837  | -3.048 | 18.546 |      |
| 1.00157.06 |     | H   |     |    |        |        |        |      |
| ATOM       | 126 | HB2 | ALA | 11 | 7.009  | -1.510 | 18.795 |      |
| 1.00148.83 |     | H   |     |    |        |        |        |      |
| ATOM       | 127 | HB3 | ALA | 11 | 7.352  | -2.560 | 20.170 |      |
| 1.00137.06 |     | H   |     |    |        |        |        |      |
| ATOM       | 128 | N   | ASP | 12 | 8.596  | -0.214 | 21.406 | 1.00 |
| 18.98      |     | N   |     |    |        |        |        |      |
| ATOM       | 129 | CA  | ASP | 12 | 8.389  | 1.006  | 22.177 | 1.00 |
| 31.05      |     | C   |     |    |        |        |        |      |
| ATOM       | 130 | C   | ASP | 12 | 9.705  | 1.760  | 22.347 | 1.00 |
| 22.98      |     | C   |     |    |        |        |        |      |
| ATOM       | 131 | O   | ASP | 12 | 9.742  | 2.991  | 22.299 | 1.00 |
| 37.14      |     | O   |     |    |        |        |        |      |
| ATOM       | 132 | CB  | ASP | 12 | 7.810  | 0.664  | 23.552 | 1.00 |
| 48.35      |     | C   |     |    |        |        |        |      |

|            |     |     |     |     |        |        |        |      |
|------------|-----|-----|-----|-----|--------|--------|--------|------|
| ATOM       | 133 | CG  | ASP | 12  | 6.366  | 0.193  | 23.406 |      |
| 1.00104.83 |     |     |     | C   |        |        |        |      |
| ATOM       | 134 | OD1 | ASP | 12  | 5.844  | -0.355 | 24.362 |      |
| 1.00258.73 |     |     |     | O   |        |        |        |      |
| ATOM       | 135 | OD2 | ASP | 12  | 5.805  | 0.388  | 22.341 |      |
| 1.00213.46 |     |     |     | O1- |        |        |        |      |
| ATOM       | 136 | HN  | ASP | 12  | 8.551  | -1.083 | 21.858 | 1.00 |
| 36.19      |     |     | H   |     |        |        |        |      |
| ATOM       | 137 | HA  | ASP | 12  | 7.688  | 1.638  | 21.652 | 1.00 |
| 49.76      |     |     | H   |     |        |        |        |      |
| ATOM       | 138 | HB1 | ASP | 12  | 7.837  | 1.543  | 24.179 | 1.00 |
| 95.71      |     |     | H   |     |        |        |        |      |
| ATOM       | 139 | HB2 | ASP | 12  | 8.400  | -0.118 | 24.004 | 1.00 |
| 54.37      |     |     | H   |     |        |        |        |      |
| ATOM       | 140 | N   | GLU | 13  | 10.780 | 1.008  | 22.555 | 1.00 |
| 17.60      |     |     | N   |     |        |        |        |      |
| ATOM       | 141 | CA  | GLU | 13  | 12.103 | 1.597  | 22.742 | 1.00 |
| 12.01      |     |     | C   |     |        |        |        |      |
| ATOM       | 142 | C   | GLU | 13  | 12.686 | 2.038  | 21.403 | 1.00 |
| 10.07      |     |     | C   |     |        |        |        |      |
| ATOM       | 143 | O   | GLU | 13  | 12.300 | 1.521  | 20.354 | 1.00 |
| 12.81      |     |     | O   |     |        |        |        |      |
| ATOM       | 144 | CB  | GLU | 13  | 13.025 | 0.565  | 23.395 | 1.00 |
| 11.74      |     |     | C   |     |        |        |        |      |
| ATOM       | 145 | CG  | GLU | 13  | 12.510 | 0.242  | 24.800 | 1.00 |
| 13.49      |     |     | C   |     |        |        |        |      |
| ATOM       | 146 | CD  | GLU | 13  | 13.174 | -1.026 | 25.327 |      |
| 1.00142.36 |     |     |     | C   |        |        |        |      |
| ATOM       | 147 | OE1 | GLU | 13  | 12.985 | -1.329 | 26.492 |      |
| 1.00339.06 |     |     |     | O   |        |        |        |      |
| ATOM       | 148 | OE2 | GLU | 13  | 13.853 | -1.678 | 24.553 |      |
| 1.00335.28 |     |     |     | O1- |        |        |        |      |
| ATOM       | 149 | HN  | GLU | 13  | 10.682 | 0.033  | 22.588 | 1.00 |
| 28.36      |     |     | H   |     |        |        |        |      |
| ATOM       | 150 | HA  | GLU | 13  | 12.020 | 2.452  | 23.394 | 1.00 |
| 13.06      |     |     | H   |     |        |        |        |      |
| ATOM       | 151 | HB1 | GLU | 13  | 14.024 | 0.968  | 23.463 | 1.00 |
| 13.76      |     |     | H   |     |        |        |        |      |
| ATOM       | 152 | HB2 | GLU | 13  | 13.040 | -0.334 | 22.797 | 1.00 |
| 9.94       |     |     | H   |     |        |        |        |      |
| ATOM       | 153 | HG1 | GLU | 13  | 11.440 | 0.098  | 24.766 | 1.00 |
| 66.02      |     |     | H   |     |        |        |        |      |
| ATOM       | 154 | HG2 | GLU | 13  | 12.738 | 1.065  | 25.462 | 1.00 |
| 56.23      |     |     | H   |     |        |        |        |      |
| ATOM       | 155 | N   | CYS | 14  | 13.619 | 2.993  | 21.441 | 1.00 |
| 9.12       |     |     | N   |     |        |        |        |      |
| ATOM       | 156 | CA  | CYS | 14  | 14.253 | 3.493  | 20.214 | 1.00 |
| 10.69      |     |     | C   |     |        |        |        |      |
| ATOM       | 157 | C   | CYS | 14  | 15.695 | 3.003  | 20.129 | 1.00 |
| 9.56       |     |     | C   |     |        |        |        |      |
| ATOM       | 158 | O   | CYS | 14  | 16.223 | 2.441  | 21.087 | 1.00 |
| 13.62      |     |     | O   |     |        |        |        |      |

|            |     |     |     |    |        |       |        |      |
|------------|-----|-----|-----|----|--------|-------|--------|------|
| ATOM       | 159 | CB  | CYS | 14 | 14.216 | 5.036 | 20.181 | 1.00 |
| 13.96      |     |     | C   |    |        |       |        |      |
| ATOM       | 160 | SG  | CYS | 14 | 15.628 | 5.728 | 21.087 | 1.00 |
| 42.96      |     |     | S   |    |        |       |        |      |
| ATOM       | 161 | HN  | CYS | 14 | 13.892 | 3.365 | 22.308 | 1.00 |
| 9.76       |     |     | H   |    |        |       |        |      |
| ATOM       | 162 | HA  | CYS | 14 | 13.713 | 3.119 | 19.353 | 1.00 |
| 15.54      |     |     | H   |    |        |       |        |      |
| ATOM       | 163 | HB1 | CYS | 14 | 13.297 | 5.378 | 20.637 | 1.00 |
| 50.72      |     |     | H   |    |        |       |        |      |
| ATOM       | 164 | HB2 | CYS | 14 | 14.252 | 5.373 | 19.156 | 1.00 |
| 46.13      |     |     | H   |    |        |       |        |      |
| ATOM       | 165 | N   | CYS | 15 | 16.329 | 3.231 | 18.984 | 1.00 |
| 9.60       |     |     | N   |    |        |       |        |      |
| ATOM       | 166 | CA  | CYS | 15 | 17.714 | 2.820 | 18.789 | 1.00 |
| 9.28       |     |     | C   |    |        |       |        |      |
| ATOM       | 167 | C   | CYS | 15 | 18.346 | 3.680 | 17.706 | 1.00 |
| 9.92       |     |     | C   |    |        |       |        |      |
| ATOM       | 168 | O   | CYS | 15 | 17.800 | 3.812 | 16.611 | 1.00 |
| 13.31      |     |     | O   |    |        |       |        |      |
| ATOM       | 169 | CB  | CYS | 15 | 17.777 | 1.346 | 18.382 | 1.00 |
| 12.90      |     |     | C   |    |        |       |        |      |
| ATOM       | 170 | SG  | CYS | 15 | 19.471 | 0.731 | 18.576 | 1.00 |
| 39.11      |     |     | S   |    |        |       |        |      |
| ATOM       | 171 | HN  | CYS | 15 | 15.859 | 3.693 | 18.258 | 1.00 |
| 13.12      |     |     | H   |    |        |       |        |      |
| ATOM       | 172 | HA  | CYS | 15 | 18.260 | 2.956 | 19.712 | 1.00 |
| 8.26       |     |     | H   |    |        |       |        |      |
| ATOM       | 173 | HB1 | CYS | 15 | 17.473 | 1.243 | 17.351 | 1.00 |
| 24.82      |     |     | H   |    |        |       |        |      |
| ATOM       | 174 | HB2 | CYS | 15 | 17.113 | 0.771 | 19.011 | 1.00 |
| 27.31      |     |     | H   |    |        |       |        |      |
| ATOM       | 175 | N   | VAL | 16 | 19.494 | 4.273 | 18.014 | 1.00 |
| 9.56       |     |     | N   |    |        |       |        |      |
| ATOM       | 176 | CA  | VAL | 16 | 20.179 | 5.127 | 17.049 | 1.00 |
| 11.99      |     |     | C   |    |        |       |        |      |
| ATOM       | 177 | C   | VAL | 16 | 21.681 | 5.100 | 17.290 | 1.00 |
| 7.73       |     |     | C   |    |        |       |        |      |
| ATOM       | 178 | O   | VAL | 16 | 22.147 | 5.296 | 18.413 | 1.00 |
| 8.83       |     |     | O   |    |        |       |        |      |
| ATOM       | 179 | CB  | VAL | 16 | 19.653 | 6.559 | 17.167 | 1.00 |
| 18.37      |     |     | C   |    |        |       |        |      |
| ATOM       | 180 | CG1 | VAL | 16 | 19.852 | 7.065 | 18.597 | 1.00 |
| 39.61      |     |     | C   |    |        |       |        |      |
| ATOM       | 181 | CG2 | VAL | 16 | 20.413 | 7.460 | 16.195 |      |
| 1.00115.21 |     |     | C   |    |        |       |        |      |
| ATOM       | 182 | HN  | VAL | 16 | 19.886 | 4.141 | 18.904 | 1.00 |
| 9.76       |     |     | H   |    |        |       |        |      |
| ATOM       | 183 | HA  | VAL | 16 | 19.982 | 4.764 | 16.050 | 1.00 |
| 17.27      |     |     | H   |    |        |       |        |      |
| ATOM       | 184 | HB  | VAL | 16 | 18.600 | 6.573 | 16.925 | 1.00 |
| 52.63      |     |     | H   |    |        |       |        |      |



|            |     |      |     |    |        |       |        |      |
|------------|-----|------|-----|----|--------|-------|--------|------|
| ATOM       | 185 | HG11 | VAL | 16 | 19.279 | 7.970 | 18.740 |      |
| 1.00128.07 |     |      |     |    |        |       |        | H    |
| ATOM       | 186 | HG12 | VAL | 16 | 20.897 | 7.271 | 18.762 |      |
| 1.00154.13 |     |      |     |    |        |       |        | H    |
| ATOM       | 187 | HG13 | VAL | 16 | 19.514 | 6.314 | 19.296 |      |
| 1.00135.74 |     |      |     |    |        |       |        | H    |
| ATOM       | 188 | HG21 | VAL | 16 | 20.456 | 6.988 | 15.225 |      |
| 1.00229.05 |     |      |     |    |        |       |        | H    |
| ATOM       | 189 | HG22 | VAL | 16 | 21.415 | 7.620 | 16.561 |      |
| 1.00261.82 |     |      |     |    |        |       |        | H    |
| ATOM       | 190 | HG23 | VAL | 16 | 19.904 | 8.408 | 16.112 |      |
| 1.00210.07 |     |      |     |    |        |       |        | H    |
| ATOM       | 191 | N    | ASP | 17 | 22.439 | 4.846 | 16.225 | 1.00 |
| 14.34      |     |      | N   |    |        |       |        |      |
| ATOM       | 192 | CA   | ASP | 17 | 23.896 | 4.782 | 16.321 | 1.00 |
| 11.90      |     |      | C   |    |        |       |        |      |
| ATOM       | 193 | C    | ASP | 17 | 24.525 | 6.123 | 15.963 | 1.00 |
| 13.15      |     |      | C   |    |        |       |        |      |
| ATOM       | 194 | O    | ASP | 17 | 24.364 | 6.620 | 14.848 | 1.00 |
| 25.96      |     |      | O   |    |        |       |        |      |
| ATOM       | 195 | CB   | ASP | 17 | 24.428 | 3.707 | 15.373 | 1.00 |
| 20.80      |     |      | C   |    |        |       |        |      |
| ATOM       | 196 | CG   | ASP | 17 | 24.057 | 2.322 | 15.893 | 1.00 |
| 28.72      |     |      | C   |    |        |       |        |      |
| ATOM       | 197 | OD1  | ASP | 17 | 24.166 | 1.376 | 15.130 |      |
| 1.00135.42 |     |      |     |    |        |       |        | O    |
| ATOM       | 198 | OD2  | ASP | 17 | 23.668 | 2.228 | 17.046 |      |
| 1.00114.17 |     |      |     |    |        |       |        | O1-  |
| ATOM       | 199 | HN   | ASP | 17 | 22.009 | 4.691 | 15.358 | 1.00 |
| 28.29      |     |      | H   |    |        |       |        |      |
| ATOM       | 200 | HA   | ASP | 17 | 24.178 | 4.522 | 17.332 | 1.00 |
| 10.49      |     |      | H   |    |        |       |        |      |
| ATOM       | 201 | HB1  | ASP | 17 | 25.505 | 3.787 | 15.310 | 1.00 |
| 22.42      |     |      | H   |    |        |       |        |      |
| ATOM       | 202 | HB2  | ASP | 17 | 24.000 | 3.849 | 14.393 | 1.00 |
| 29.52      |     |      | H   |    |        |       |        |      |
| ATOM       | 203 | N    | THR | 18 | 25.262 | 6.695 | 16.913 | 1.00 |
| 11.55      |     |      | N   |    |        |       |        |      |
| ATOM       | 204 | CA   | THR | 18 | 25.941 | 7.972 | 16.701 | 1.00 |
| 17.10      |     |      | C   |    |        |       |        |      |
| ATOM       | 205 | C    | THR | 18 | 27.430 | 7.732 | 16.494 | 1.00 |
| 10.63      |     |      | C   |    |        |       |        |      |
| ATOM       | 206 | O    | THR | 18 | 27.937 | 6.654 | 16.799 | 1.00 |
| 6.49       |     |      | O   |    |        |       |        |      |
| ATOM       | 207 | CB   | THR | 18 | 25.732 | 8.889 | 17.909 | 1.00 |
| 28.52      |     |      | C   |    |        |       |        |      |
| ATOM       | 208 | CG2  | THR | 18 | 24.305 | 9.434 | 17.906 | 1.00 |
| 45.38      |     |      | C   |    |        |       |        |      |
| ATOM       | 209 | OG1  | THR | 18 | 25.962 | 8.157 | 19.101 | 1.00 |
| 26.49      |     |      | O   |    |        |       |        |      |
| ATOM       | 210 | HN   | THR | 18 | 25.361 | 6.240 | 17.776 | 1.00 |
| 13.96      |     |      | H   |    |        |       |        |      |

|            |     |      |     |    |        |        |        |      |
|------------|-----|------|-----|----|--------|--------|--------|------|
| ATOM       | 211 | HA   | THR | 18 | 25.539 | 8.455  | 15.821 | 1.00 |
| 26.43      |     |      | H   |    |        |        |        |      |
| ATOM       | 212 | HB   | THR | 18 | 26.425 | 9.715  | 17.856 | 1.00 |
| 37.43      |     |      | H   |    |        |        |        |      |
| ATOM       | 213 | HG1  | THR | 18 | 25.276 | 7.491  | 19.178 | 1.00 |
| 71.62      |     |      | H   |    |        |        |        |      |
| ATOM       | 214 | HG21 | THR | 18 | 24.193 | 10.149 | 18.707 |      |
| 1.00100.44 |     |      | H   |    |        |        |        |      |
| ATOM       | 215 | HG22 | THR | 18 | 23.608 | 8.621  | 18.049 |      |
| 1.00129.42 |     |      | H   |    |        |        |        |      |
| ATOM       | 216 | HG23 | THR | 18 | 24.106 | 9.917  | 16.962 |      |
| 1.00156.21 |     |      | H   |    |        |        |        |      |
| ATOM       | 217 | N    | VAL | 19 | 28.124 | 8.748  | 15.985 | 1.00 |
| 16.32      |     |      | N   |    |        |        |        |      |
| ATOM       | 218 | CA   | VAL | 19 | 29.543 | 8.657  | 15.745 | 1.00 |
| 13.34      |     |      | C   |    |        |        |        |      |
| ATOM       | 219 | C    | VAL | 19 | 30.020 | 9.943  | 15.098 | 1.00 |
| 25.88      |     |      | C   |    |        |        |        |      |
| ATOM       | 220 | O    | VAL | 19 | 29.578 | 10.328 | 14.016 | 1.00 |
| 42.11      |     |      | O   |    |        |        |        |      |
| ATOM       | 221 | CB   | VAL | 19 | 29.894 | 7.461  | 14.853 | 1.00 |
| 15.48      |     |      | C   |    |        |        |        |      |
| ATOM       | 222 | CG1  | VAL | 19 | 28.976 | 7.428  | 13.628 | 1.00 |
| 29.06      |     |      | C   |    |        |        |        |      |
| ATOM       | 223 | CG2  | VAL | 19 | 31.354 | 7.588  | 14.393 | 1.00 |
| 20.67      |     |      | C   |    |        |        |        |      |
| ATOM       | 224 | HN   | VAL | 19 | 27.675 | 9.585  | 15.780 | 1.00 |
| 26.89      |     |      | H   |    |        |        |        |      |
| ATOM       | 225 | HA   | VAL | 19 | 30.047 | 8.540  | 16.694 | 1.00 |
| 8.08       |     |      | H   |    |        |        |        |      |
| ATOM       | 226 | HB   | VAL | 19 | 29.777 | 6.549  | 15.420 | 1.00 |
| 11.49      |     |      | H   |    |        |        |        |      |
| ATOM       | 227 | HG11 | VAL | 19 | 29.123 | 6.501  | 13.094 |      |
| 1.00137.43 |     |      | H   |    |        |        |        |      |
| ATOM       | 228 | HG12 | VAL | 19 | 29.210 | 8.257  | 12.979 | 1.00 |
| 93.29      |     |      | H   |    |        |        |        |      |
| ATOM       | 229 | HG13 | VAL | 19 | 27.946 | 7.499  | 13.946 |      |
| 1.00108.69 |     |      | H   |    |        |        |        |      |
| ATOM       | 230 | HG21 | VAL | 19 | 31.428 | 8.359  | 13.639 | 1.00 |
| 99.42      |     |      | H   |    |        |        |        |      |
| ATOM       | 231 | HG22 | VAL | 19 | 31.688 | 6.650  | 13.981 |      |
| 1.00111.36 |     |      | H   |    |        |        |        |      |
| ATOM       | 232 | HG23 | VAL | 19 | 31.972 | 7.859  | 15.240 | 1.00 |
| 77.11      |     |      | H   |    |        |        |        |      |
| ATOM       | 233 | N    | PHE | 20 | 30.922 | 10.591 | 15.788 | 1.00 |
| 24.58      |     |      | N   |    |        |        |        |      |
| ATOM       | 234 | CA   | PHE | 20 | 31.500 | 11.848 | 15.338 | 1.00 |
| 40.34      |     |      | C   |    |        |        |        |      |
| ATOM       | 235 | C    | PHE | 20 | 32.850 | 11.620 | 14.668 | 1.00 |
| 40.37      |     |      | C   |    |        |        |        |      |
| ATOM       | 236 | O    | PHE | 20 | 33.009 | 11.878 | 13.474 | 1.00 |
| 66.02      |     |      | O   |    |        |        |        |      |

|            |     |     |     |    |        |        |        |      |
|------------|-----|-----|-----|----|--------|--------|--------|------|
| ATOM       | 237 | CB  | PHE | 20 | 31.662 | 12.803 | 16.539 | 1.00 |
| 48.79      |     |     | C   |    |        |        |        |      |
| ATOM       | 238 | CG  | PHE | 20 | 31.848 | 12.018 | 17.826 | 1.00 |
| 35.75      |     |     | C   |    |        |        |        |      |
| ATOM       | 239 | CD1 | PHE | 20 | 30.799 | 11.235 | 18.340 | 1.00 |
| 30.20      |     |     | C   |    |        |        |        |      |
| ATOM       | 240 | CD2 | PHE | 20 | 33.069 | 12.076 | 18.511 | 1.00 |
| 40.95      |     |     | C   |    |        |        |        |      |
| ATOM       | 241 | CE1 | PHE | 20 | 30.977 | 10.517 | 19.526 | 1.00 |
| 30.41      |     |     | C   |    |        |        |        |      |
| ATOM       | 242 | CE2 | PHE | 20 | 33.244 | 11.356 | 19.698 | 1.00 |
| 45.84      |     |     | C   |    |        |        |        |      |
| ATOM       | 243 | CZ  | PHE | 20 | 32.200 | 10.576 | 20.205 | 1.00 |
| 40.81      |     |     | C   |    |        |        |        |      |
| ATOM       | 244 | HN  | PHE | 20 | 31.200 | 10.213 | 16.638 | 1.00 |
| 16.73      |     |     | H   |    |        |        |        |      |
| ATOM       | 245 | HA  | PHE | 20 | 30.835 | 12.310 | 14.617 | 1.00 |
| 59.91      |     |     | H   |    |        |        |        |      |
| ATOM       | 246 | HB1 | PHE | 20 | 30.784 | 13.403 | 16.623 | 1.00 |
| 67.15      |     |     | H   |    |        |        |        |      |
| ATOM       | 247 | HB2 | PHE | 20 | 32.514 | 13.451 | 16.386 | 1.00 |
| 58.17      |     |     | H   |    |        |        |        |      |
| ATOM       | 248 | HD1 | PHE | 20 | 29.851 | 11.183 | 17.821 | 1.00 |
| 33.34      |     |     | H   |    |        |        |        |      |
| ATOM       | 249 | HD2 | PHE | 20 | 33.876 | 12.677 | 18.122 | 1.00 |
| 49.35      |     |     | H   |    |        |        |        |      |
| ATOM       | 250 | HE1 | PHE | 20 | 30.173 | 9.915  | 19.914 | 1.00 |
| 30.61      |     |     | H   |    |        |        |        |      |
| ATOM       | 251 | HE2 | PHE | 20 | 34.188 | 11.401 | 20.222 | 1.00 |
| 61.27      |     |     | H   |    |        |        |        |      |
| ATOM       | 252 | HZ  | PHE | 20 | 32.336 | 10.020 | 21.120 | 1.00 |
| 52.66      |     |     | H   |    |        |        |        |      |
| ATOM       | 253 | N   | GLU | 21 | 33.830 | 11.170 | 15.446 | 1.00 |
| 41.31      |     |     | N   |    |        |        |        |      |
| ATOM       | 254 | CA  | GLU | 21 | 35.166 | 10.952 | 14.936 | 1.00 |
| 56.16      |     |     | C   |    |        |        |        |      |
| ATOM       | 255 | C   | GLU | 21 | 35.490 | 9.467  | 14.831 | 1.00 |
| 58.61      |     |     | C   |    |        |        |        |      |
| ATOM       | 256 | O   | GLU | 21 | 34.620 | 8.612  | 15.003 |      |
| 1.00201.19 |     |     | O   |    |        |        |        |      |
| ATOM       | 257 | CB  | GLU | 21 | 36.119 | 11.631 | 15.895 | 1.00 |
| 57.37      |     |     | C   |    |        |        |        |      |
| ATOM       | 258 | CG  | GLU | 21 | 36.082 | 10.913 | 17.241 |      |
| 1.00193.56 |     |     | C   |    |        |        |        |      |
| ATOM       | 259 | CD  | GLU | 21 | 36.795 | 11.749 | 18.298 |      |
| 1.00304.62 |     |     | C   |    |        |        |        |      |
| ATOM       | 260 | OE1 | GLU | 21 | 36.740 | 11.375 | 19.458 |      |
| 1.00451.81 |     |     | O   |    |        |        |        |      |
| ATOM       | 261 | OE2 | GLU | 21 | 37.386 | 12.751 | 17.932 |      |
| 1.00442.88 |     |     | O1- |    |        |        |        |      |
| ATOM       | 262 | HN  | GLU | 21 | 33.665 | 11.009 | 16.396 | 1.00 |
| 50.82      |     |     | H   |    |        |        |        |      |

|            |     |     |     |    |        |        |        |      |
|------------|-----|-----|-----|----|--------|--------|--------|------|
| ATOM       | 263 | HA  | GLU | 21 | 35.272 | 11.408 | 13.962 | 1.00 |
| 85.72      |     |     | H   |    |        |        |        |      |
| ATOM       | 264 | HB1 | GLU | 21 | 35.804 | 12.653 | 16.031 | 1.00 |
| 46.37      |     |     | H   |    |        |        |        |      |
| ATOM       | 265 | HB2 | GLU | 21 | 37.111 | 11.603 | 15.495 |      |
| 1.00131.81 |     |     | H   |    |        |        |        |      |
| ATOM       | 266 | HG1 | GLU | 21 | 36.570 | 9.960  | 17.148 |      |
| 1.00314.91 |     |     | H   |    |        |        |        |      |
| ATOM       | 267 | HG2 | GLU | 21 | 35.058 | 10.755 | 17.536 |      |
| 1.00266.92 |     |     | H   |    |        |        |        |      |
| ATOM       | 268 | N   | GLY | 22 | 36.751 | 9.172  | 14.530 | 1.00 |
| 86.70      |     |     | N   |    |        |        |        |      |
| ATOM       | 269 | CA  | GLY | 22 | 37.205 | 7.786  | 14.383 |      |
| 1.00104.66 |     |     | C   |    |        |        |        |      |
| ATOM       | 270 | C   | GLY | 22 | 37.822 | 7.247  | 15.672 | 1.00 |
| 71.50      |     |     | C   |    |        |        |        |      |
| ATOM       | 271 | O   | GLY | 22 | 38.037 | 6.043  | 15.807 | 1.00 |
| 89.87      |     |     | O   |    |        |        |        |      |
| ATOM       | 272 | HN  | GLY | 22 | 37.391 | 9.907  | 14.402 |      |
| 1.00214.64 |     |     | H   |    |        |        |        |      |
| ATOM       | 273 | HA1 | GLY | 22 | 37.945 | 7.742  | 13.598 |      |
| 1.00152.47 |     |     | H   |    |        |        |        |      |
| ATOM       | 274 | HA2 | GLY | 22 | 36.365 | 7.162  | 14.107 |      |
| 1.00118.15 |     |     | H   |    |        |        |        |      |
| ATOM       | 275 | N   | ASP | 23 | 38.112 | 8.139  | 16.614 | 1.00 |
| 44.68      |     |     | N   |    |        |        |        |      |
| ATOM       | 276 | CA  | ASP | 23 | 38.713 | 7.726  | 17.880 | 1.00 |
| 43.33      |     |     | C   |    |        |        |        |      |
| ATOM       | 277 | C   | ASP | 23 | 37.798 | 6.758  | 18.621 | 1.00 |
| 37.55      |     |     | C   |    |        |        |        |      |
| ATOM       | 278 | O   | ASP | 23 | 38.256 | 5.768  | 19.192 | 1.00 |
| 61.37      |     |     | O   |    |        |        |        |      |
| ATOM       | 279 | CB  | ASP | 23 | 38.967 | 8.950  | 18.762 | 1.00 |
| 40.74      |     |     | C   |    |        |        |        |      |
| ATOM       | 280 | CG  | ASP | 23 | 40.105 | 9.784  | 18.182 |      |
| 1.00141.86 |     |     | C   |    |        |        |        |      |
| ATOM       | 281 | OD1 | ASP | 23 | 40.804 | 9.279  | 17.319 |      |
| 1.00328.18 |     |     | O   |    |        |        |        |      |
| ATOM       | 282 | OD2 | ASP | 23 | 40.261 | 10.916 | 18.610 |      |
| 1.00304.58 |     |     | O1- |    |        |        |        |      |
| ATOM       | 283 | HN  | ASP | 23 | 37.928 | 9.086  | 16.453 | 1.00 |
| 40.86      |     |     | H   |    |        |        |        |      |
| ATOM       | 284 | HA  | ASP | 23 | 39.652 | 7.238  | 17.680 | 1.00 |
| 72.12      |     |     | H   |    |        |        |        |      |
| ATOM       | 285 | HB1 | ASP | 23 | 39.234 | 8.625  | 19.755 | 1.00 |
| 94.15      |     |     | H   |    |        |        |        |      |
| ATOM       | 286 | HB2 | ASP | 23 | 38.071 | 9.548  | 18.811 | 1.00 |
| 93.26      |     |     | H   |    |        |        |        |      |
| ATOM       | 287 | N   | MET | 24 | 36.508 | 7.054  | 18.605 | 1.00 |
| 23.24      |     |     | N   |    |        |        |        |      |
| ATOM       | 288 | CA  | MET | 24 | 35.528 | 6.208  | 19.277 | 1.00 |
| 32.50      |     |     | C   |    |        |        |        |      |

|            |     |      |     |    |        |       |        |      |
|------------|-----|------|-----|----|--------|-------|--------|------|
| ATOM       | 289 | C    | MET | 24 | 34.134 | 6.476 | 18.736 | 1.00 |
| 25.13      |     |      | C   |    |        |       |        |      |
| ATOM       | 290 | O    | MET | 24 | 33.890 | 7.501 | 18.100 | 1.00 |
| 54.40      |     |      | O   |    |        |       |        |      |
| ATOM       | 291 | CB   | MET | 24 | 35.558 | 6.464 | 20.787 | 1.00 |
| 47.36      |     |      | C   |    |        |       |        |      |
| ATOM       | 292 | CG   | MET | 24 | 35.186 | 7.921 | 21.071 |      |
| 1.00151.73 |     |      | C   |    |        |       |        |      |
| ATOM       | 293 | SD   | MET | 24 | 35.351 | 8.253 | 22.845 |      |
| 1.00209.23 |     |      | S   |    |        |       |        |      |
| ATOM       | 294 | CE   | MET | 24 | 37.156 | 8.143 | 22.954 |      |
| 1.00243.29 |     |      | C   |    |        |       |        |      |
| ATOM       | 295 | HN   | MET | 24 | 36.206 | 7.856 | 18.131 | 1.00 |
| 17.32      |     |      | H   |    |        |       |        |      |
| ATOM       | 296 | HA   | MET | 24 | 35.771 | 5.172 | 19.094 | 1.00 |
| 48.94      |     |      | H   |    |        |       |        |      |
| ATOM       | 297 | HB1  | MET | 24 | 36.551 | 6.268 | 21.163 |      |
| 1.00124.40 |     |      | H   |    |        |       |        |      |
| ATOM       | 298 | HB2  | MET | 24 | 34.854 | 5.809 | 21.276 |      |
| 1.00166.96 |     |      | H   |    |        |       |        |      |
| ATOM       | 299 | HG1  | MET | 24 | 34.164 | 8.095 | 20.769 |      |
| 1.00331.71 |     |      | H   |    |        |       |        |      |
| ATOM       | 300 | HG2  | MET | 24 | 35.840 | 8.576 | 20.515 |      |
| 1.00302.30 |     |      | H   |    |        |       |        |      |
| ATOM       | 301 | HE1  | MET | 24 | 37.597 | 8.464 | 22.021 |      |
| 1.00340.44 |     |      | H   |    |        |       |        |      |
| ATOM       | 302 | HE2  | MET | 24 | 37.444 | 7.123 | 23.152 |      |
| 1.00373.88 |     |      | H   |    |        |       |        |      |
| ATOM       | 303 | HE3  | MET | 24 | 37.505 | 8.775 | 23.759 |      |
| 1.00386.81 |     |      | H   |    |        |       |        |      |
| ATOM       | 304 | N    | VAL | 25 | 33.226 | 5.535 | 18.978 | 1.00 |
| 22.44      |     |      | N   |    |        |       |        |      |
| ATOM       | 305 | CA   | VAL | 25 | 31.861 | 5.645 | 18.506 | 1.00 |
| 15.37      |     |      | C   |    |        |       |        |      |
| ATOM       | 306 | C    | VAL | 25 | 30.880 | 5.628 | 19.669 | 1.00 |
| 17.47      |     |      | C   |    |        |       |        |      |
| ATOM       | 307 | O    | VAL | 25 | 31.214 | 5.201 | 20.776 | 1.00 |
| 29.52      |     |      | O   |    |        |       |        |      |
| ATOM       | 308 | CB   | VAL | 25 | 31.587 | 4.476 | 17.575 | 1.00 |
| 23.36      |     |      | C   |    |        |       |        |      |
| ATOM       | 309 | CG1  | VAL | 25 | 32.415 | 4.631 | 16.297 | 1.00 |
| 58.39      |     |      | C   |    |        |       |        |      |
| ATOM       | 310 | CG2  | VAL | 25 | 31.970 | 3.168 | 18.273 | 1.00 |
| 55.25      |     |      | C   |    |        |       |        |      |
| ATOM       | 311 | HN   | VAL | 25 | 33.482 | 4.734 | 19.470 | 1.00 |
| 48.11      |     |      | H   |    |        |       |        |      |
| ATOM       | 312 | HA   | VAL | 25 | 31.731 | 6.568 | 17.958 | 1.00 |
| 9.25       |     |      | H   |    |        |       |        |      |
| ATOM       | 313 | HB   | VAL | 25 | 30.551 | 4.460 | 17.335 | 1.00 |
| 52.45      |     |      | H   |    |        |       |        |      |
| ATOM       | 314 | HG11 | VAL | 25 | 32.356 | 5.651 | 15.947 |      |
| 1.00171.07 |     |      | H   |    |        |       |        |      |

|            |     |      |     |    |        |       |        |      |
|------------|-----|------|-----|----|--------|-------|--------|------|
| ATOM       | 315 | HG12 | VAL | 25 | 32.030 | 3.969 | 15.536 |      |
| 1.00166.22 |     |      |     |    |        |       |        | H    |
| ATOM       | 316 | HG13 | VAL | 25 | 33.445 | 4.383 | 16.502 |      |
| 1.00134.76 |     |      |     |    |        |       |        | H    |
| ATOM       | 317 | HG21 | VAL | 25 | 31.622 | 2.332 | 17.685 |      |
| 1.00141.88 |     |      |     |    |        |       |        | H    |
| ATOM       | 318 | HG22 | VAL | 25 | 31.515 | 3.133 | 19.251 |      |
| 1.00184.50 |     |      |     |    |        |       |        | H    |
| ATOM       | 319 | HG23 | VAL | 25 | 33.044 | 3.115 | 18.372 |      |
| 1.00133.90 |     |      |     |    |        |       |        | H    |
| ATOM       | 320 | N    | THR | 26 | 29.670 | 6.116 | 19.411 | 1.00 |
| 13.60      |     |      | N   |    |        |       |        |      |
| ATOM       | 321 | CA   | THR | 26 | 28.628 | 6.187 | 20.433 | 1.00 |
| 21.19      |     |      | C   |    |        |       |        |      |
| ATOM       | 322 | C    | THR | 26 | 27.320 | 5.580 | 19.932 | 1.00 |
| 16.55      |     |      | C   |    |        |       |        |      |
| ATOM       | 323 | O    | THR | 26 | 26.921 | 5.793 | 18.786 | 1.00 |
| 11.43      |     |      | O   |    |        |       |        |      |
| ATOM       | 324 | CB   | THR | 26 | 28.403 | 7.651 | 20.808 | 1.00 |
| 27.07      |     |      | C   |    |        |       |        |      |
| ATOM       | 325 | CG2  | THR | 26 | 27.259 | 7.761 | 21.819 | 1.00 |
| 44.39      |     |      | C   |    |        |       |        |      |
| ATOM       | 326 | OG1  | THR | 26 | 29.595 | 8.175 | 21.375 | 1.00 |
| 34.75      |     |      | O   |    |        |       |        |      |
| ATOM       | 327 | HN   | THR | 26 | 29.476 | 6.453 | 18.510 | 1.00 |
| 10.81      |     |      | H   |    |        |       |        |      |
| ATOM       | 328 | HA   | THR | 26 | 28.945 | 5.649 | 21.315 | 1.00 |
| 33.16      |     |      | H   |    |        |       |        |      |
| ATOM       | 329 | HB   | THR | 26 | 28.153 | 8.210 | 19.917 | 1.00 |
| 20.60      |     |      | H   |    |        |       |        |      |
| ATOM       | 330 | HG1  | THR | 26 | 29.562 | 8.027 | 22.323 | 1.00 |
| 77.72      |     |      | H   |    |        |       |        |      |
| ATOM       | 331 | HG21 | THR | 26 | 27.225 | 8.766 | 22.213 |      |
| 1.00126.99 |     |      |     |    |        |       |        | H    |
| ATOM       | 332 | HG22 | THR | 26 | 27.424 | 7.064 | 22.626 |      |
| 1.00108.32 |     |      |     |    |        |       |        | H    |
| ATOM       | 333 | HG23 | THR | 26 | 26.322 | 7.535 | 21.334 |      |
| 1.00151.99 |     |      |     |    |        |       |        | H    |
| ATOM       | 334 | N    | ARG | 27 | 26.655 | 4.824 | 20.807 | 1.00 |
| 22.38      |     |      | N   |    |        |       |        |      |
| ATOM       | 335 | CA   | ARG | 27 | 25.381 | 4.181 | 20.472 | 1.00 |
| 20.21      |     |      | C   |    |        |       |        |      |
| ATOM       | 336 | C    | ARG | 27 | 24.338 | 4.517 | 21.532 | 1.00 |
| 16.96      |     |      | C   |    |        |       |        |      |
| ATOM       | 337 | O    | ARG | 27 | 24.682 | 4.814 | 22.676 | 1.00 |
| 20.06      |     |      | O   |    |        |       |        |      |
| ATOM       | 338 | CB   | ARG | 27 | 25.569 | 2.663 | 20.402 | 1.00 |
| 22.14      |     |      | C   |    |        |       |        |      |
| ATOM       | 339 | CG   | ARG | 27 | 26.549 | 2.319 | 19.279 |      |
| 1.00124.30 |     |      |     |    |        |       |        | C    |
| ATOM       | 340 | CD   | ARG | 27 | 26.553 | 0.808 | 19.048 |      |
| 1.00109.38 |     |      |     |    |        |       |        | C    |

|      |            |      |     |     |        |        |        |      |  |
|------|------------|------|-----|-----|--------|--------|--------|------|--|
| ATOM | 341        | NE   | ARG | 27  | 27.004 | 0.114  | 20.252 |      |  |
|      | 1.00227.73 |      |     | N   |        |        |        |      |  |
| ATOM | 342        | CZ   | ARG | 27  | 28.298 | -0.091 | 20.488 |      |  |
|      | 1.00426.12 |      |     | C   |        |        |        |      |  |
| ATOM | 343        | NH1  | ARG | 27  | 28.672 | -0.715 | 21.571 |      |  |
|      | 1.00767.09 |      |     | N1+ |        |        |        |      |  |
| ATOM | 344        | NH2  | ARG | 27  | 29.191 | 0.332  | 19.637 |      |  |
|      | 1.00581.78 |      |     | N   |        |        |        |      |  |
| ATOM | 345        | HN   | ARG | 27  | 27.029 | 4.698  | 21.704 | 1.00 |  |
|      | 30.75      |      | H   |     |        |        |        |      |  |
| ATOM | 346        | HA   | ARG | 27  | 25.034 | 4.535  | 19.511 | 1.00 |  |
|      | 23.13      |      | H   |     |        |        |        |      |  |
| ATOM | 347        | HB1  | ARG | 27  | 24.619 | 2.192  | 20.205 | 1.00 |  |
|      | 87.46      |      | H   |     |        |        |        |      |  |
| ATOM | 348        | HB2  | ARG | 27  | 25.960 | 2.306  | 21.343 |      |  |
|      | 1.00103.36 |      |     | H   |        |        |        |      |  |
| ATOM | 349        | HG1  | ARG | 27  | 27.542 | 2.640  | 19.555 |      |  |
|      | 1.00281.97 |      |     | H   |        |        |        |      |  |
| ATOM | 350        | HG2  | ARG | 27  | 26.247 | 2.822  | 18.372 |      |  |
|      | 1.00276.19 |      |     | H   |        |        |        |      |  |
| ATOM | 351        | HD1  | ARG | 27  | 27.212 | 0.572  | 18.225 |      |  |
|      | 1.00183.60 |      |     | H   |        |        |        |      |  |
| ATOM | 352        | HD2  | ARG | 27  | 25.552 | 0.483  | 18.806 |      |  |
|      | 1.00142.93 |      |     | H   |        |        |        |      |  |
| ATOM | 353        | HE   | ARG | 27  | 26.342 | -0.207 | 20.898 |      |  |
|      | 1.00372.53 |      |     | H   |        |        |        |      |  |
| ATOM | 354        | HH11 | ARG | 27  | 27.986 | -1.039 | 22.225 |      |  |
|      | 1.00910.59 |      |     | H   |        |        |        |      |  |
| ATOM | 355        | HH12 | ARG | 27  | 29.644 | -0.869 | 21.749 |      |  |
|      | 1.00999.99 |      |     | H   |        |        |        |      |  |
| ATOM | 356        | HH21 | ARG | 27  | 28.905 | 0.811  | 18.807 |      |  |
|      | 1.00532.54 |      |     | H   |        |        |        |      |  |
| ATOM | 357        | HH22 | ARG | 27  | 30.163 | 0.177  | 19.815 |      |  |
|      | 1.00948.84 |      |     | H   |        |        |        |      |  |
| ATOM | 358        | N    | SER | 28  | 23.058 | 4.478  | 21.154 | 1.00 |  |
|      | 14.60      |      | N   |     |        |        |        |      |  |
| ATOM | 359        | CA   | SER | 28  | 21.980 | 4.792  | 22.095 | 1.00 |  |
|      | 14.92      |      | C   |     |        |        |        |      |  |
| ATOM | 360        | C    | SER | 28  | 20.781 | 3.878  | 21.870 | 1.00 |  |
|      | 12.12      |      | C   |     |        |        |        |      |  |
| ATOM | 361        | O    | SER | 28  | 20.511 | 3.449  | 20.747 | 1.00 |  |
|      | 13.41      |      | O   |     |        |        |        |      |  |
| ATOM | 362        | CB   | SER | 28  | 21.549 | 6.250  | 21.925 | 1.00 |  |
|      | 23.26      |      | C   |     |        |        |        |      |  |
| ATOM | 363        | OG   | SER | 28  | 20.498 | 6.536  | 22.838 |      |  |
|      | 1.00146.32 |      |     | O   |        |        |        |      |  |
| ATOM | 364        | HN   | SER | 28  | 22.834 | 4.240  | 20.228 | 1.00 |  |
|      | 15.23      |      | H   |     |        |        |        |      |  |
| ATOM | 365        | HA   | SER | 28  | 22.334 | 4.652  | 23.107 | 1.00 |  |
|      | 15.44      |      | H   |     |        |        |        |      |  |
| ATOM | 366        | HB1  | SER | 28  | 21.211 | 6.407  | 20.911 | 1.00 |  |
|      | 88.73      |      | H   |     |        |        |        |      |  |

|          |     |     |     |    |        |       |        |      |
|----------|-----|-----|-----|----|--------|-------|--------|------|
| ATOM     | 367 | HB2 | SER | 28 | 22.384 | 6.899 | 22.128 |      |
| 1.00124. | 68  |     |     |    |        |       |        | H    |
| ATOM     | 368 | HG  | SER | 28 | 20.854 | 7.092 | 23.536 |      |
| 1.00242. | 47  |     |     |    |        |       |        | H    |
| ATOM     | 369 | N   | CYS | 29 | 20.067 | 3.586 | 22.952 | 1.00 |
| 10.48    |     |     | N   |    |        |       |        |      |
| ATOM     | 370 | CA  | CYS | 29 | 18.896 | 2.723 | 22.885 | 1.00 |
| 9.97     |     |     | C   |    |        |       |        |      |
| ATOM     | 371 | C   | CYS | 29 | 18.178 | 2.738 | 24.235 | 1.00 |
| 11.60    |     |     | C   |    |        |       |        |      |
| ATOM     | 372 | O   | CYS | 29 | 18.617 | 2.089 | 25.184 | 1.00 |
| 15.64    |     |     | O   |    |        |       |        |      |
| ATOM     | 373 | CB  | CYS | 29 | 19.319 | 1.291 | 22.516 | 1.00 |
| 9.52     |     |     | C   |    |        |       |        |      |
| ATOM     | 374 | SG  | CYS | 29 | 18.014 | 0.491 | 21.566 | 1.00 |
| 10.40    |     |     | S   |    |        |       |        |      |
| ATOM     | 375 | HN  | CYS | 29 | 20.334 | 3.965 | 23.816 | 1.00 |
| 11.10    |     |     | H   |    |        |       |        |      |
| ATOM     | 376 | HA  | CYS | 29 | 18.226 | 3.102 | 22.127 | 1.00 |
| 11.08    |     |     | H   |    |        |       |        |      |
| ATOM     | 377 | HB1 | CYS | 29 | 19.500 | 0.709 | 23.412 | 1.00 |
| 9.33     |     |     | H   |    |        |       |        |      |
| ATOM     | 378 | HB2 | CYS | 29 | 20.217 | 1.319 | 21.923 | 1.00 |
| 10.78    |     |     | H   |    |        |       |        |      |
| ATOM     | 379 | N   | GLU | 30 | 17.090 | 3.496 | 24.322 | 1.00 |
| 13.52    |     |     | N   |    |        |       |        |      |
| ATOM     | 380 | CA  | GLU | 30 | 16.349 | 3.596 | 25.566 | 1.00 |
| 17.41    |     |     | C   |    |        |       |        |      |
| ATOM     | 381 | C   | GLU | 30 | 15.821 | 2.244 | 26.005 | 1.00 |
| 10.81    |     |     | C   |    |        |       |        |      |
| ATOM     | 382 | O   | GLU | 30 | 15.749 | 1.299 | 25.220 | 1.00 |
| 23.22    |     |     | O   |    |        |       |        |      |
| ATOM     | 383 | CB  | GLU | 30 | 15.181 | 4.562 | 25.403 | 1.00 |
| 37.83    |     |     | C   |    |        |       |        |      |
| ATOM     | 384 | CG  | GLU | 30 | 14.417 | 4.220 | 24.126 |      |
| 1.00108. | 13  |     |     |    |        |       |        | C    |
| ATOM     | 385 | CD  | GLU | 30 | 13.214 | 5.145 | 23.971 |      |
| 1.00240. | 52  |     |     |    |        |       |        | C    |
| ATOM     | 386 | OE1 | GLU | 30 | 12.308 | 5.046 | 24.780 |      |
| 1.00422. | 56  |     |     |    |        |       |        | O    |
| ATOM     | 387 | OE2 | GLU | 30 | 13.216 | 5.937 | 23.042 |      |
| 1.00410. | 81  |     |     |    |        |       |        | O1-  |
| ATOM     | 388 | HN  | GLU | 30 | 16.788 | 4.003 | 23.543 | 1.00 |
| 15.61    |     |     | H   |    |        |       |        |      |
| ATOM     | 389 | HA  | GLU | 30 | 17.006 | 3.979 | 26.333 | 1.00 |
| 24.60    |     |     | H   |    |        |       |        |      |
| ATOM     | 390 | HB1 | GLU | 30 | 15.553 | 5.566 | 25.347 | 1.00 |
| 72.67    |     |     | H   |    |        |       |        |      |
| ATOM     | 391 | HB2 | GLU | 30 | 14.523 | 4.472 | 26.250 | 1.00 |
| 56.47    |     |     | H   |    |        |       |        |      |
| ATOM     | 392 | HG1 | GLU | 30 | 14.078 | 3.199 | 24.177 |      |
| 1.00196. | 66  |     |     |    |        |       |        | H    |



|            |     |     |     |    |        |        |        |      |
|------------|-----|-----|-----|----|--------|--------|--------|------|
| ATOM       | 393 | HG2 | GLU | 30 | 15.070 | 4.338  | 23.278 |      |
| 1.00140.67 |     |     |     |    |        |        |        |      |
| ATOM       | 394 | N   | LYS | 31 | 15.440 | 2.180  | 27.274 | 1.00 |
| 11.96      |     |     | N   |    |        |        |        |      |
| ATOM       | 395 | CA  | LYS | 31 | 14.897 | 0.956  | 27.862 | 1.00 |
| 11.40      |     |     | C   |    |        |        |        |      |
| ATOM       | 396 | C   | LYS | 31 | 13.682 | 1.283  | 28.721 | 1.00 |
| 10.99      |     |     | C   |    |        |        |        |      |
| ATOM       | 397 | O   | LYS | 31 | 13.647 | 2.316  | 29.389 | 1.00 |
| 12.86      |     |     | O   |    |        |        |        |      |
| ATOM       | 398 | CB  | LYS | 31 | 15.963 | 0.273  | 28.719 | 1.00 |
| 21.40      |     |     | C   |    |        |        |        |      |
| ATOM       | 399 | CG  | LYS | 31 | 17.145 | -0.133 | 27.831 | 1.00 |
| 57.81      |     |     | C   |    |        |        |        |      |
| ATOM       | 400 | CD  | LYS | 31 | 18.115 | -1.026 | 28.615 |      |
| 1.00115.52 |     |     |     |    |        |        |        | C    |
| ATOM       | 401 | CE  | LYS | 31 | 18.887 | -0.194 | 29.646 |      |
| 1.00250.23 |     |     |     |    |        |        |        | C    |
| ATOM       | 402 | NZ  | LYS | 31 | 19.987 | -1.018 | 30.222 |      |
| 1.00462.10 |     |     |     |    |        |        |        | N1+  |
| ATOM       | 403 | HN  | LYS | 31 | 15.517 | 2.986  | 27.828 | 1.00 |
| 26.13      |     |     | H   |    |        |        |        |      |
| ATOM       | 404 | HA  | LYS | 31 | 14.595 | 0.279  | 27.074 | 1.00 |
| 13.87      |     |     | H   |    |        |        |        |      |
| ATOM       | 405 | HB1 | LYS | 31 | 15.543 | -0.607 | 29.184 | 1.00 |
| 37.63      |     |     | H   |    |        |        |        |      |
| ATOM       | 406 | HB2 | LYS | 31 | 16.298 | 0.960  | 29.481 | 1.00 |
| 47.19      |     |     | H   |    |        |        |        |      |
| ATOM       | 407 | HG1 | LYS | 31 | 17.663 | 0.753  | 27.500 |      |
| 1.00126.32 |     |     |     |    |        |        |        | H    |
| ATOM       | 408 | HG2 | LYS | 31 | 16.775 | -0.674 | 26.972 |      |
| 1.00114.19 |     |     |     |    |        |        |        | H    |
| ATOM       | 409 | HD1 | LYS | 31 | 18.815 | -1.482 | 27.931 |      |
| 1.00198.45 |     |     |     |    |        |        |        | H    |
| ATOM       | 410 | HD2 | LYS | 31 | 17.559 | -1.799 | 29.126 |      |
| 1.00200.14 |     |     |     |    |        |        |        | H    |
| ATOM       | 411 | HE1 | LYS | 31 | 18.220 | 0.114  | 30.436 |      |
| 1.00374.64 |     |     |     |    |        |        |        | H    |
| ATOM       | 412 | HE2 | LYS | 31 | 19.305 | 0.680  | 29.166 |      |
| 1.00403.27 |     |     |     |    |        |        |        | H    |
| ATOM       | 413 | HZ1 | LYS | 31 | 20.083 | -1.899 | 29.678 |      |
| 1.00627.38 |     |     |     |    |        |        |        | H    |
| ATOM       | 414 | HZ2 | LYS | 31 | 19.766 | -1.245 | 31.213 |      |
| 1.00622.26 |     |     |     |    |        |        |        | H    |
| ATOM       | 415 | HZ3 | LYS | 31 | 20.879 | -0.487 | 30.177 |      |
| 1.00619.20 |     |     |     |    |        |        |        | H    |
| ATOM       | 416 | N   | THR | 32 | 12.686 | 0.399  | 28.700 | 1.00 |
| 15.51      |     |     | N   |    |        |        |        |      |
| ATOM       | 417 | CA  | THR | 32 | 11.464 | 0.601  | 29.482 | 1.00 |
| 22.44      |     |     | C   |    |        |        |        |      |
| ATOM       | 418 | C   | THR | 32 | 11.364 | -0.428 | 30.605 | 1.00 |
| 26.60      |     |     | C   |    |        |        |        |      |

|            |     |      |     |    |        |        |        |      |
|------------|-----|------|-----|----|--------|--------|--------|------|
| ATOM       | 419 | O    | THR | 32 | 11.373 | -1.634 | 30.360 | 1.00 |
| 57.43      |     | O    |     |    |        |        |        |      |
| ATOM       | 420 | CB   | THR | 32 | 10.239 | 0.480  | 28.571 | 1.00 |
| 56.28      |     | C    |     |    |        |        |        |      |
| ATOM       | 421 | CG2  | THR | 32 | 8.967  | 0.685  | 29.393 |      |
| 1.00102.70 |     |      |     |    |        |        |        | C    |
| ATOM       | 422 | OG1  | THR | 32 | 10.312 | 1.468  | 27.552 |      |
| 1.00111.17 |     |      |     |    |        |        |        | O    |
| ATOM       | 423 | HN   | THR | 32 | 12.773 | -0.405 | 28.145 | 1.00 |
| 18.79      |     | H    |     |    |        |        |        |      |
| ATOM       | 424 | HA   | THR | 32 | 11.471 | 1.591  | 29.918 | 1.00 |
| 19.67      |     | H    |     |    |        |        |        |      |
| ATOM       | 425 | HB   | THR | 32 | 10.219 | -0.499 | 28.122 | 1.00 |
| 84.25      |     | H    |     |    |        |        |        |      |
| ATOM       | 426 | HG1  | THR | 32 | 9.941  | 1.095  | 26.750 |      |
| 1.00205.03 |     |      |     |    |        |        |        | H    |
| ATOM       | 427 | HG21 | THR | 32 | 9.071  | 1.570  | 30.003 |      |
| 1.00220.71 |     |      |     |    |        |        |        | H    |
| ATOM       | 428 | HG22 | THR | 32 | 8.807  | -0.173 | 30.030 |      |
| 1.00174.67 |     |      |     |    |        |        |        | H    |
| ATOM       | 429 | HG23 | THR | 32 | 8.123  | 0.801  | 28.730 |      |
| 1.00217.44 |     |      |     |    |        |        |        | H    |
| ATOM       | 430 | N    | THR | 33 | 11.260 | 0.064  | 31.836 | 1.00 |
| 22.47      |     | N    |     |    |        |        |        |      |
| ATOM       | 431 | CA   | THR | 33 | 11.147 | -0.809 | 33.001 | 1.00 |
| 41.60      |     | C    |     |    |        |        |        |      |
| ATOM       | 432 | C    | THR | 33 | 10.439 | -0.098 | 34.119 | 1.00 |
| 38.03      |     | C    |     |    |        |        |        |      |
| ATOM       | 433 | O    | THR | 33 | 11.059 | 0.466  | 35.019 | 1.00 |
| 52.73      |     | O    |     |    |        |        |        |      |
| ATOM       | 434 | CB   | THR | 33 | 12.524 | -1.271 | 33.475 | 1.00 |
| 63.25      |     | C    |     |    |        |        |        |      |
| ATOM       | 435 | CG2  | THR | 33 | 13.128 | -2.238 | 32.456 |      |
| 1.00121.65 |     |      |     |    |        |        |        | C    |
| ATOM       | 436 | OG1  | THR | 33 | 13.374 | -0.143 | 33.626 | 1.00 |
| 96.20      |     | O    |     |    |        |        |        |      |
| ATOM       | 437 | HN   | THR | 33 | 11.252 | 1.034  | 31.964 | 1.00 |
| 23.82      |     | H    |     |    |        |        |        |      |
| ATOM       | 438 | HA   | THR | 33 | 10.552 | -1.667 | 32.751 | 1.00 |
| 67.12      |     | H    |     |    |        |        |        |      |
| ATOM       | 439 | HB   | THR | 33 | 12.419 | -1.774 | 34.423 |      |
| 1.00107.59 |     |      |     |    |        |        |        | H    |
| ATOM       | 440 | HG1  | THR | 33 | 14.268 | -0.463 | 33.768 |      |
| 1.00176.27 |     |      |     |    |        |        |        | H    |
| ATOM       | 441 | HG21 | THR | 33 | 12.394 | -2.981 | 32.183 |      |
| 1.00255.23 |     |      |     |    |        |        |        | H    |
| ATOM       | 442 | HG22 | THR | 33 | 13.988 | -2.726 | 32.890 |      |
| 1.00245.37 |     |      |     |    |        |        |        | H    |
| ATOM       | 443 | HG23 | THR | 33 | 13.432 | -1.690 | 31.575 |      |
| 1.00185.78 |     |      |     |    |        |        |        | H    |
| ATOM       | 444 | N    | GLY | 34 | 9.123  | -0.147 | 34.052 | 1.00 |
| 40.93      |     | N    |     |    |        |        |        |      |

|            |     |      |     |    |        |        |        |      |
|------------|-----|------|-----|----|--------|--------|--------|------|
| ATOM       | 445 | CA   | GLY | 34 | 8.307  | 0.477  | 35.062 | 1.00 |
| 45.59      |     |      | C   |    |        |        |        |      |
| ATOM       | 446 | C    | GLY | 34 | 8.226  | 1.979  | 34.827 | 1.00 |
| 40.97      |     |      | C   |    |        |        |        |      |
| ATOM       | 447 | O    | GLY | 34 | 7.497  | 2.692  | 35.515 | 1.00 |
| 82.17      |     |      | O   |    |        |        |        |      |
| ATOM       | 448 | HN   | GLY | 34 | 8.699  | -0.626 | 33.313 | 1.00 |
| 54.00      |     |      | H   |    |        |        |        |      |
| ATOM       | 449 | HA1  | GLY | 34 | 8.754  | 0.284  | 36.017 | 1.00 |
| 54.41      |     |      | H   |    |        |        |        |      |
| ATOM       | 450 | HA2  | GLY | 34 | 7.313  | 0.049  | 35.035 | 1.00 |
| 62.09      |     |      | H   |    |        |        |        |      |
| ATOM       | 451 | N    | ASN | 35 | 8.984  | 2.446  | 33.837 | 1.00 |
| 32.51      |     |      | N   |    |        |        |        |      |
| ATOM       | 452 | CA   | ASN | 35 | 9.008  | 3.862  | 33.488 | 1.00 |
| 33.20      |     |      | C   |    |        |        |        |      |
| ATOM       | 453 | C    | ASN | 35 | 9.414  | 4.031  | 32.026 | 1.00 |
| 23.17      |     |      | C   |    |        |        |        |      |
| ATOM       | 454 | O    | ASN | 35 | 10.167 | 3.221  | 31.487 | 1.00 |
| 27.01      |     |      | O   |    |        |        |        |      |
| ATOM       | 455 | CB   | ASN | 35 | 9.995  | 4.613  | 34.381 | 1.00 |
| 54.51      |     |      | C   |    |        |        |        |      |
| ATOM       | 456 | CG   | ASN | 35 | 9.606  | 4.455  | 35.846 | 1.00 |
| 80.73      |     |      | C   |    |        |        |        |      |
| ATOM       | 457 | ND2  | ASN | 35 | 10.490 | 4.025  | 36.704 |      |
| 1.00220.46 |     |      | N   |    |        |        |        |      |
| ATOM       | 458 | OD1  | ASN | 35 | 8.465  | 4.729  | 36.220 |      |
| 1.00117.80 |     |      | O   |    |        |        |        |      |
| ATOM       | 459 | HN   | ASN | 35 | 9.537  | 1.820  | 33.325 | 1.00 |
| 51.15      |     |      | H   |    |        |        |        |      |
| ATOM       | 460 | HA   | ASN | 35 | 8.020  | 4.279  | 33.629 | 1.00 |
| 47.21      |     |      | H   |    |        |        |        |      |
| ATOM       | 461 | HB1  | ASN | 35 | 9.985  | 5.661  | 34.120 | 1.00 |
| 68.31      |     |      | H   |    |        |        |        |      |
| ATOM       | 462 | HB2  | ASN | 35 | 10.989 | 4.215  | 34.229 | 1.00 |
| 57.75      |     |      | H   |    |        |        |        |      |
| ATOM       | 463 | HD21 | ASN | 35 | 11.398 | 3.806  | 36.405 |      |
| 1.00405.39 |     |      | H   |    |        |        |        |      |
| ATOM       | 464 | HD22 | ASN | 35 | 10.247 | 3.920  | 37.647 |      |
| 1.00245.64 |     |      | H   |    |        |        |        |      |
| ATOM       | 465 | N    | PHE | 36 | 8.908  | 5.083  | 31.387 | 1.00 |
| 35.72      |     |      | N   |    |        |        |        |      |
| ATOM       | 466 | CA   | PHE | 36 | 9.211  | 5.351  | 29.989 | 1.00 |
| 33.41      |     |      | C   |    |        |        |        |      |
| ATOM       | 467 | C    | PHE | 36 | 10.238 | 6.471  | 29.859 | 1.00 |
| 28.51      |     |      | C   |    |        |        |        |      |
| ATOM       | 468 | O    | PHE | 36 | 10.222 | 7.435  | 30.625 | 1.00 |
| 45.23      |     |      | O   |    |        |        |        |      |
| ATOM       | 469 | CB   | PHE | 36 | 7.924  | 5.752  | 29.282 | 1.00 |
| 67.53      |     |      | C   |    |        |        |        |      |
| ATOM       | 470 | CG   | PHE | 36 | 6.985  | 4.572  | 29.252 | 1.00 |
| 86.71      |     |      | C   |    |        |        |        |      |

|            |     |      |     |    |        |       |        |      |
|------------|-----|------|-----|----|--------|-------|--------|------|
| ATOM       | 471 | CD1  | PHE | 36 | 6.061  | 4.388 | 30.287 |      |
| 1.00106.51 |     |      |     |    |        |       |        | C    |
| ATOM       | 472 | CD2  | PHE | 36 | 7.039  | 3.658 | 28.192 | 1.00 |
| 99.48      |     |      |     |    |        |       |        | C    |
| ATOM       | 473 | CE1  | PHE | 36 | 5.189  | 3.294 | 30.262 |      |
| 1.00134.48 |     |      |     |    |        |       |        | C    |
| ATOM       | 474 | CE2  | PHE | 36 | 6.168  | 2.562 | 28.167 |      |
| 1.00134.27 |     |      |     |    |        |       |        | C    |
| ATOM       | 475 | CZ   | PHE | 36 | 5.242  | 2.381 | 29.201 |      |
| 1.00149.48 |     |      |     |    |        |       |        | C    |
| ATOM       | 476 | HN   | PHE | 36 | 8.307  | 5.691 | 31.859 | 1.00 |
| 62.87      |     |      | H   |    |        |       |        |      |
| ATOM       | 477 | HA   | PHE | 36 | 9.601  | 4.457 | 29.521 | 1.00 |
| 28.53      |     |      | H   |    |        |       |        |      |
| ATOM       | 478 | HB1  | PHE | 36 | 8.150  | 6.059 | 28.281 | 1.00 |
| 73.56      |     |      | H   |    |        |       |        |      |
| ATOM       | 479 | HB2  | PHE | 36 | 7.460  | 6.569 | 29.814 | 1.00 |
| 88.42      |     |      | H   |    |        |       |        |      |
| ATOM       | 480 | HD1  | PHE | 36 | 6.021  | 5.094 | 31.105 |      |
| 1.00110.20 |     |      |     |    |        |       |        | H    |
| ATOM       | 481 | HD2  | PHE | 36 | 7.755  | 3.796 | 27.394 | 1.00 |
| 93.07      |     |      | H   |    |        |       |        |      |
| ATOM       | 482 | HE1  | PHE | 36 | 4.476  | 3.153 | 31.060 |      |
| 1.00155.06 |     |      |     |    |        |       |        | H    |
| ATOM       | 483 | HE2  | PHE | 36 | 6.210  | 1.859 | 27.349 |      |
| 1.00159.46 |     |      |     |    |        |       |        | H    |
| ATOM       | 484 | HZ   | PHE | 36 | 4.570  | 1.536 | 29.182 |      |
| 1.00183.25 |     |      |     |    |        |       |        | H    |
| ATOM       | 485 | N    | THR | 37 | 11.127 | 6.339 | 28.879 | 1.00 |
| 20.06      |     |      | N   |    |        |       |        |      |
| ATOM       | 486 | CA   | THR | 37 | 12.156 | 7.342 | 28.643 | 1.00 |
| 27.18      |     |      | C   |    |        |       |        |      |
| ATOM       | 487 | C    | THR | 37 | 12.617 | 7.288 | 27.192 | 1.00 |
| 41.87      |     |      | C   |    |        |       |        |      |
| ATOM       | 488 | O    | THR | 37 | 13.030 | 6.241 | 26.697 |      |
| 1.00169.86 |     |      |     |    |        |       |        | O    |
| ATOM       | 489 | CB   | THR | 37 | 13.349 | 7.102 | 29.575 | 1.00 |
| 26.52      |     |      | C   |    |        |       |        |      |
| ATOM       | 490 | CG2  | THR | 37 | 13.961 | 5.726 | 29.293 | 1.00 |
| 75.69      |     |      | C   |    |        |       |        |      |
| ATOM       | 491 | OG1  | THR | 37 | 14.327 | 8.109 | 29.357 | 1.00 |
| 81.95      |     |      | O   |    |        |       |        |      |
| ATOM       | 492 | HN   | THR | 37 | 11.087 | 5.556 | 28.296 | 1.00 |
| 18.47      |     |      | H   |    |        |       |        |      |
| ATOM       | 493 | HA   | THR | 37 | 11.749 | 8.322 | 28.845 | 1.00 |
| 38.80      |     |      | H   |    |        |       |        |      |
| ATOM       | 494 | HB   | THR | 37 | 13.017 | 7.138 | 30.601 | 1.00 |
| 81.60      |     |      | H   |    |        |       |        |      |
| ATOM       | 495 | HG1  | THR | 37 | 14.699 | 8.350 | 30.209 |      |
| 1.00188.80 |     |      |     |    |        |       |        | H    |
| ATOM       | 496 | HG21 | THR | 37 | 14.566 | 5.424 | 30.134 |      |
| 1.00196.98 |     |      |     |    |        |       |        | H    |

|      |            |      |     |    |        |        |        |      |
|------|------------|------|-----|----|--------|--------|--------|------|
| ATOM | 497        | HG22 | THR | 37 | 14.577 | 5.781  | 28.409 |      |
|      | 1.00196.23 |      |     |    |        |        |        | H    |
| ATOM | 498        | HG23 | THR | 37 | 13.173 | 5.003  | 29.140 |      |
|      | 1.00168.92 |      |     |    |        |        |        | H    |
| ATOM | 499        | N    | GLU | 38 | 12.533 | 8.425  | 26.517 | 1.00 |
|      | 26.53      |      | N   |    |        |        |        |      |
| ATOM | 500        | CA   | GLU | 38 | 12.933 | 8.513  | 25.115 | 1.00 |
|      | 30.29      |      | C   |    |        |        |        |      |
| ATOM | 501        | C    | GLU | 38 | 14.445 | 8.678  | 24.992 | 1.00 |
|      | 25.39      |      | C   |    |        |        |        |      |
| ATOM | 502        | O    | GLU | 38 | 15.114 | 9.099  | 25.937 | 1.00 |
|      | 51.60      |      | O   |    |        |        |        |      |
| ATOM | 503        | CB   | GLU | 38 | 12.237 | 9.701  | 24.447 | 1.00 |
|      | 54.82      |      | C   |    |        |        |        |      |
| ATOM | 504        | CG   | GLU | 38 | 10.717 | 9.483  | 24.441 |      |
|      | 1.00165.84 |      | C   |    |        |        |        |      |
| ATOM | 505        | CD   | GLU | 38 | 10.124 | 9.834  | 25.803 |      |
|      | 1.00292.92 |      | C   |    |        |        |        |      |
| ATOM | 506        | OE1  | GLU | 38 | 10.876 | 10.253 | 26.668 |      |
|      | 1.00414.19 |      | O   |    |        |        |        |      |
| ATOM | 507        | OE2  | GLU | 38 | 8.924  | 9.678  | 25.962 |      |
|      | 1.00537.65 |      | O1- |    |        |        |        |      |
| ATOM | 508        | HN   | GLU | 38 | 12.187 | 9.220  | 26.968 | 1.00 |
|      | 84.50      |      | H   |    |        |        |        |      |
| ATOM | 509        | HA   | GLU | 38 | 12.639 | 7.606  | 24.607 | 1.00 |
|      | 32.15      |      | H   |    |        |        |        |      |
| ATOM | 510        | HB1  | GLU | 38 | 12.586 | 9.793  | 23.429 |      |
|      | 1.00144.82 |      | H   |    |        |        |        |      |
| ATOM | 511        | HB2  | GLU | 38 | 12.471 | 10.607 | 24.987 |      |
|      | 1.00106.49 |      | H   |    |        |        |        |      |
| ATOM | 512        | HG1  | GLU | 38 | 10.500 | 8.449  | 24.213 |      |
|      | 1.00303.31 |      | H   |    |        |        |        |      |
| ATOM | 513        | HG2  | GLU | 38 | 10.271 | 10.113 | 23.685 |      |
|      | 1.00323.99 |      | H   |    |        |        |        |      |
| ATOM | 514        | N    | CYS | 39 | 14.977 | 8.349  | 23.814 | 1.00 |
|      | 15.84      |      | N   |    |        |        |        |      |
| ATOM | 515        | CA   | CYS | 39 | 16.414 | 8.470  | 23.565 | 1.00 |
|      | 14.30      |      | C   |    |        |        |        |      |
| ATOM | 516        | C    | CYS | 39 | 16.922 | 9.805  | 24.134 | 1.00 |
|      | 22.31      |      | C   |    |        |        |        |      |
| ATOM | 517        | O    | CYS | 39 | 16.130 | 10.718 | 24.366 | 1.00 |
|      | 32.92      |      | O   |    |        |        |        |      |
| ATOM | 518        | CB   | CYS | 39 | 16.693 | 8.386  | 22.042 | 1.00 |
|      | 18.08      |      | C   |    |        |        |        |      |
| ATOM | 519        | SG   | CYS | 39 | 15.249 | 7.709  | 21.181 | 1.00 |
|      | 17.41      |      | S   |    |        |        |        |      |
| ATOM | 520        | HN   | CYS | 39 | 14.391 | 8.026  | 23.102 | 1.00 |
|      | 24.87      |      | H   |    |        |        |        |      |
| ATOM | 521        | HA   | CYS | 39 | 16.924 | 7.656  | 24.065 | 1.00 |
|      | 14.60      |      | H   |    |        |        |        |      |
| ATOM | 522        | HB1  | CYS | 39 | 17.541 | 7.739  | 21.862 | 1.00 |
|      | 27.71      |      | H   |    |        |        |        |      |

|            |     |     |     |    |        |        |        |      |
|------------|-----|-----|-----|----|--------|--------|--------|------|
| ATOM       | 523 | HB2 | CYS | 39 | 16.910 | 9.369  | 21.648 | 1.00 |
| 34.91      |     |     | H   |    |        |        |        |      |
| ATOM       | 524 | N   | PRO | 40 | 18.204 | 9.940  | 24.370 | 1.00 |
| 27.27      |     |     | N   |    |        |        |        |      |
| ATOM       | 525 | CA  | PRO | 40 | 18.777 | 11.196 | 24.929 | 1.00 |
| 47.66      |     |     | C   |    |        |        |        |      |
| ATOM       | 526 | C   | PRO | 40 | 18.846 | 12.307 | 23.881 | 1.00 |
| 71.54      |     |     | C   |    |        |        |        |      |
| ATOM       | 527 | O   | PRO | 40 | 19.294 | 12.087 | 22.756 | 1.00 |
| 87.70      |     |     | O   |    |        |        |        |      |
| ATOM       | 528 | CB  | PRO | 40 | 20.174 | 10.772 | 25.396 | 1.00 |
| 53.85      |     |     | C   |    |        |        |        |      |
| ATOM       | 529 | CG  | PRO | 40 | 20.552 | 9.648  | 24.486 | 1.00 |
| 46.04      |     |     | C   |    |        |        |        |      |
| ATOM       | 530 | CD  | PRO | 40 | 19.246 | 8.926  | 24.127 | 1.00 |
| 25.70      |     |     | C   |    |        |        |        |      |
| ATOM       | 531 | HA  | PRO | 40 | 18.196 | 11.523 | 25.776 | 1.00 |
| 58.04      |     |     | H   |    |        |        |        |      |
| ATOM       | 532 | HB1 | PRO | 40 | 20.137 | 10.422 | 26.419 | 1.00 |
| 67.93      |     |     | H   |    |        |        |        |      |
| ATOM       | 533 | HB2 | PRO | 40 | 20.873 | 11.594 | 25.305 | 1.00 |
| 70.99      |     |     | H   |    |        |        |        |      |
| ATOM       | 534 | HG1 | PRO | 40 | 21.222 | 8.964  | 24.988 | 1.00 |
| 65.91      |     |     | H   |    |        |        |        |      |
| ATOM       | 535 | HG2 | PRO | 40 | 21.024 | 10.040 | 23.591 | 1.00 |
| 54.99      |     |     | H   |    |        |        |        |      |
| ATOM       | 536 | HD1 | PRO | 40 | 19.092 | 8.072  | 24.766 | 1.00 |
| 24.22      |     |     | H   |    |        |        |        |      |
| ATOM       | 537 | HD2 | PRO | 40 | 19.256 | 8.631  | 23.091 | 1.00 |
| 26.94      |     |     | H   |    |        |        |        |      |
| ATOM       | 538 | N   | GLY | 41 | 18.396 | 13.493 | 24.264 |      |
| 1.00105.24 |     |     | N   |    |        |        |        |      |
| ATOM       | 539 | CA  | GLY | 41 | 18.404 | 14.637 | 23.359 |      |
| 1.00147.55 |     |     | C   |    |        |        |        |      |
| ATOM       | 540 | C   | GLY | 41 | 19.825 | 15.015 | 22.961 |      |
| 1.00161.74 |     |     | C   |    |        |        |        |      |
| ATOM       | 541 | O   | GLY | 41 | 20.089 | 15.352 | 21.808 |      |
| 1.00244.37 |     |     | O   |    |        |        |        |      |
| ATOM       | 542 | HN  | GLY | 41 | 18.050 | 13.603 | 25.174 |      |
| 1.00121.79 |     |     | H   |    |        |        |        |      |
| ATOM       | 543 | HA1 | GLY | 41 | 17.939 | 15.480 | 23.847 |      |
| 1.00184.40 |     |     | H   |    |        |        |        |      |
| ATOM       | 544 | HA2 | GLY | 41 | 17.844 | 14.388 | 22.472 |      |
| 1.00157.34 |     |     | H   |    |        |        |        |      |
| ATOM       | 545 | N   | LEU | 42 | 20.735 | 14.960 | 23.930 |      |
| 1.00162.48 |     |     | N   |    |        |        |        |      |
| ATOM       | 546 | CA  | LEU | 42 | 22.140 | 15.303 | 23.691 |      |
| 1.00191.48 |     |     | C   |    |        |        |        |      |
| ATOM       | 547 | C   | LEU | 42 | 23.027 | 14.071 | 23.851 |      |
| 1.00166.66 |     |     | C   |    |        |        |        |      |
| ATOM       | 548 | O   | LEU | 42 | 22.758 | 13.204 | 24.681 |      |
| 1.00251.38 |     |     | O   |    |        |        |        |      |

|            |     |      |     |    |        |        |        |
|------------|-----|------|-----|----|--------|--------|--------|
| ATOM       | 549 | CB   | LEU | 42 | 22.588 | 16.377 | 24.687 |
| 1.00307.99 |     |      |     | C  |        |        |        |
| ATOM       | 550 | CG   | LEU | 42 | 21.665 | 17.599 | 24.592 |
| 1.00452.28 |     |      |     | C  |        |        |        |
| ATOM       | 551 | CD1  | LEU | 42 | 22.096 | 18.635 | 25.633 |
| 1.00681.24 |     |      |     | C  |        |        |        |
| ATOM       | 552 | CD2  | LEU | 42 | 21.748 | 18.215 | 23.184 |
| 1.00527.46 |     |      |     | C  |        |        |        |
| ATOM       | 553 | HN   | LEU | 42 | 20.455 | 14.688 | 24.829 |
| 1.00195.47 |     |      |     | H  |        |        |        |
| ATOM       | 554 | HA   | LEU | 42 | 22.260 | 15.687 | 22.688 |
| 1.00229.77 |     |      |     | H  |        |        |        |
| ATOM       | 555 | HB1  | LEU | 42 | 23.599 | 16.676 | 24.460 |
| 1.00342.49 |     |      |     | H  |        |        |        |
| ATOM       | 556 | HB2  | LEU | 42 | 22.549 | 15.974 | 25.689 |
| 1.00335.33 |     |      |     | H  |        |        |        |
| ATOM       | 557 | HG   | LEU | 42 | 20.648 | 17.294 | 24.792 |
| 1.00427.79 |     |      |     | H  |        |        |        |
| ATOM       | 558 | HD11 | LEU | 42 | 21.591 | 19.571 | 25.440 |
| 1.00909.71 |     |      |     | H  |        |        |        |
| ATOM       | 559 | HD12 | LEU | 42 | 23.164 | 18.784 | 25.573 |
| 1.00706.80 |     |      |     | H  |        |        |        |
| ATOM       | 560 | HD13 | LEU | 42 | 21.836 | 18.283 | 26.621 |
| 1.00858.82 |     |      |     | H  |        |        |        |
| ATOM       | 561 | HD21 | LEU | 42 | 21.088 | 17.678 | 22.517 |
| 1.00631.69 |     |      |     | H  |        |        |        |
| ATOM       | 562 | HD22 | LEU | 42 | 22.761 | 18.150 | 22.815 |
| 1.00628.06 |     |      |     | H  |        |        |        |
| ATOM       | 563 | HD23 | LEU | 42 | 21.446 | 19.252 | 23.221 |
| 1.00656.75 |     |      |     | H  |        |        |        |
| ATOM       | 564 | N    | THR | 43 | 24.083 | 14.005 | 23.048 |
| 1.00178.52 |     |      |     | N  |        |        |        |
| ATOM       | 565 | CA   | THR | 43 | 25.008 | 12.878 | 23.105 |
| 1.00240.84 |     |      |     | C  |        |        |        |
| ATOM       | 566 | C    | THR | 43 | 25.923 | 13.023 | 24.327 |
| 1.00372.31 |     |      |     | C  |        |        |        |
| ATOM       | 567 | O    | THR | 43 | 25.869 | 14.043 | 25.014 |
| 1.00500.13 |     |      |     | O  |        |        |        |
| ATOM       | 568 | CB   | THR | 43 | 25.841 | 12.830 | 21.818 |
| 1.00354.13 |     |      |     | C  |        |        |        |
| ATOM       | 569 | CG2  | THR | 43 | 24.997 | 13.328 | 20.641 |
| 1.00463.04 |     |      |     | C  |        |        |        |
| ATOM       | 570 | OG1  | THR | 43 | 26.983 | 13.663 | 21.962 |
| 1.00508.50 |     |      |     | O  |        |        |        |
| ATOM       | 571 | HN   | THR | 43 | 24.247 | 14.729 | 22.407 |
| 1.00229.59 |     |      |     | H  |        |        |        |
| ATOM       | 572 | HA   | THR | 43 | 24.433 | 11.970 | 23.191 |
| 1.00249.90 |     |      |     | H  |        |        |        |
| ATOM       | 573 | HB   | THR | 43 | 26.153 | 11.816 | 21.620 |
| 1.00481.58 |     |      |     | H  |        |        |        |
| ATOM       | 574 | HG1  | THR | 43 | 27.748 | 13.098 | 22.088 |
| 1.00624.31 |     |      |     | H  |        |        |        |

|            |     |      |     |    |        |        |        |
|------------|-----|------|-----|----|--------|--------|--------|
| ATOM       | 575 | HG21 | THR | 43 | 25.488 | 13.073 | 19.714 |
| 1.00650.95 |     |      |     | H  |        |        |        |
| ATOM       | 576 | HG22 | THR | 43 | 24.886 | 14.400 | 20.707 |
| 1.00580.73 |     |      |     | H  |        |        |        |
| ATOM       | 577 | HG23 | THR | 43 | 24.025 | 12.861 | 20.674 |
| 1.00571.99 |     |      |     | H  |        |        |        |
| ATOM       | 578 | N    | PRO | 44 | 26.750 | 12.043 | 24.630 |
| 1.00488.39 |     |      |     | N  |        |        |        |
| ATOM       | 579 | CA   | PRO | 44 | 27.661 | 12.114 | 25.814 |
| 1.00760.13 |     |      |     | C  |        |        |        |
| ATOM       | 580 | C    | PRO | 44 | 28.653 | 13.270 | 25.692 |
| 1.00735.36 |     |      |     | C  |        |        |        |
| ATOM       | 581 | O    | PRO | 44 | 29.205 | 13.735 | 26.689 |
| 1.00999.99 |     |      |     | O  |        |        |        |
| ATOM       | 582 | CB   | PRO | 44 | 28.379 | 10.747 | 25.814 |
| 1.00999.99 |     |      |     | C  |        |        |        |
| ATOM       | 583 | CG   | PRO | 44 | 27.532 | 9.863  | 24.962 |
| 1.00856.94 |     |      |     | C  |        |        |        |
| ATOM       | 584 | CD   | PRO | 44 | 26.937 | 10.777 | 23.903 |
| 1.00548.09 |     |      |     | C  |        |        |        |
| ATOM       | 585 | HA   | PRO | 44 | 27.081 | 12.219 | 26.716 |
| 1.00939.00 |     |      |     | H  |        |        |        |
| ATOM       | 586 | HB1  | PRO | 44 | 28.431 | 10.350 | 26.815 |
| 1.00999.99 |     |      |     | H  |        |        |        |
| ATOM       | 587 | HB2  | PRO | 44 | 29.374 | 10.836 | 25.394 |
| 1.00999.99 |     |      |     | H  |        |        |        |
| ATOM       | 588 | HG1  | PRO | 44 | 26.739 | 9.418  | 25.546 |
| 1.00999.99 |     |      |     | H  |        |        |        |
| ATOM       | 589 | HG2  | PRO | 44 | 28.137 | 9.092  | 24.501 |
| 1.00853.53 |     |      |     | H  |        |        |        |
| ATOM       | 590 | HD1  | PRO | 44 | 26.000 | 10.390 | 23.559 |
| 1.00602.45 |     |      |     | H  |        |        |        |
| ATOM       | 591 | HD2  | PRO | 44 | 27.637 | 10.901 | 23.086 |
| 1.00463.32 |     |      |     | H  |        |        |        |
| ATOM       | 592 | N    | ILE | 45 | 28.875 | 13.719 | 24.462 |
| 1.00518.33 |     |      |     | N  |        |        |        |
| ATOM       | 593 | CA   | ILE | 45 | 29.803 | 14.813 | 24.216 |
| 1.00582.79 |     |      |     | C  |        |        |        |
| ATOM       | 594 | C    | ILE | 45 | 29.353 | 16.069 | 24.954 |
| 1.00795.93 |     |      |     | C  |        |        |        |
| ATOM       | 595 | O    | ILE | 45 | 30.157 | 16.750 | 25.591 |
| 1.00898.75 |     |      |     | O  |        |        |        |
| ATOM       | 596 | CB   | ILE | 45 | 29.890 | 15.094 | 22.712 |
| 1.00474.41 |     |      |     | C  |        |        |        |
| ATOM       | 597 | CG1  | ILE | 45 | 30.559 | 13.910 | 22.012 |
| 1.00516.90 |     |      |     | C  |        |        |        |
| ATOM       | 598 | CG2  | ILE | 45 | 30.719 | 16.359 | 22.467 |
| 1.00760.75 |     |      |     | C  |        |        |        |
| ATOM       | 599 | CD1  | ILE | 45 | 30.400 | 14.053 | 20.498 |
| 1.00566.81 |     |      |     | C  |        |        |        |
| ATOM       | 600 | HN   | ILE | 45 | 28.408 | 13.305 | 23.707 |
| 1.00395.72 |     |      |     | H  |        |        |        |



|            |     |      |     |    |        |        |        |
|------------|-----|------|-----|----|--------|--------|--------|
| ATOM       | 601 | HA   | ILE | 45 | 30.777 | 14.527 | 24.573 |
| 1.00711.06 |     |      | H   |    |        |        |        |
| ATOM       | 602 | HB   | ILE | 45 | 28.894 | 15.234 | 22.315 |
| 1.00477.81 |     |      | H   |    |        |        |        |
| ATOM       | 603 | HG11 | ILE | 45 | 30.091 | 12.991 | 22.334 |
| 1.00624.28 |     |      | H   |    |        |        |        |
| ATOM       | 604 | HG12 | ILE | 45 | 31.609 | 13.886 | 22.266 |
| 1.00744.84 |     |      | H   |    |        |        |        |
| ATOM       | 605 | HG21 | ILE | 45 | 31.620 | 16.319 | 23.060 |
| 1.00920.57 |     |      | H   |    |        |        |        |
| ATOM       | 606 | HG22 | ILE | 45 | 30.141 | 17.227 | 22.747 |
| 1.00999.99 |     |      | H   |    |        |        |        |
| ATOM       | 607 | HG23 | ILE | 45 | 30.978 | 16.424 | 21.421 |
| 1.00865.46 |     |      | H   |    |        |        |        |
| ATOM       | 608 | HD11 | ILE | 45 | 30.803 | 15.005 | 20.182 |
| 1.00658.89 |     |      | H   |    |        |        |        |
| ATOM       | 609 | HD12 | ILE | 45 | 29.353 | 14.001 | 20.238 |
| 1.00734.30 |     |      | H   |    |        |        |        |
| ATOM       | 610 | HD13 | ILE | 45 | 30.934 | 13.256 | 20.003 |
| 1.00675.84 |     |      | H   |    |        |        |        |
| ATOM       | 611 | N    | ALA | 46 | 28.065 | 16.367 | 24.862 |
| 1.00999.99 |     |      | N   |    |        |        |        |
| ATOM       | 612 | CA   | ALA | 46 | 27.511 | 17.542 | 25.522 |
| 1.00999.99 |     |      | C   |    |        |        |        |
| ATOM       | 613 | C    | ALA | 46 | 27.752 | 17.476 | 27.027 |
| 1.00999.99 |     |      | C   |    |        |        |        |
| ATOM       | 614 | CB   | ALA | 46 | 26.009 | 17.637 | 25.249 |
| 1.00999.99 |     |      | C   |    |        |        |        |
| ATOM       | 615 | OT1  | ALA | 46 | 27.025 | 18.133 | 27.753 |
| 1.00999.99 |     |      | O   |    |        |        |        |
| ATOM       | 616 | OT2  | ALA | 46 | 28.661 | 16.769 | 27.430 |
| 1.00999.99 |     |      | O   |    |        |        |        |
| ATOM       | 617 | HN   | ALA | 46 | 27.476 | 15.784 | 24.340 |
| 1.00999.99 |     |      | H   |    |        |        |        |
| ATOM       | 618 | HA   | ALA | 46 | 27.993 | 18.425 | 25.129 |
| 1.00999.99 |     |      | H   |    |        |        |        |
| ATOM       | 619 | HB1  | ALA | 46 | 25.659 | 18.627 | 25.498 |
| 1.00999.99 |     |      | H   |    |        |        |        |
| ATOM       | 620 | HB2  | ALA | 46 | 25.487 | 16.908 | 25.850 |
| 1.00999.99 |     |      | H   |    |        |        |        |
| ATOM       | 621 | HB3  | ALA | 46 | 25.821 | 17.441 | 24.204 |
| 1.00999.99 |     |      | H   |    |        |        |        |
| ENDMDL     |     |      |     |    |        |        |        |
| TER        |     |      |     |    |        |        |        |
| MODEL      | 4   |      |     |    |        |        |        |
| ATOM       | 1   | N    | GLY | 1  | 26.757 | -0.733 | 13.713 |
| 1.00999.99 |     |      | N   |    |        |        |        |
| ATOM       | 2   | CA   | GLY | 1  | 26.717 | 0.553  | 12.959 |
| 1.00999.99 |     |      | C   |    |        |        |        |
| ATOM       | 3   | C    | GLY | 1  | 25.397 | 1.265  | 13.234 |
| 1.00999.99 |     |      | C   |    |        |        |        |
| ATOM       | 4   | O    | GLY | 1  | 25.254 | 1.958  | 14.239 |

|            |    |      |     |   |   |        |        |        |
|------------|----|------|-----|---|---|--------|--------|--------|
| 1.00999.99 |    |      |     | O |   |        |        |        |
| ATOM       | 5  | HA1  | GLY |   | 1 | 26.802 | 0.354  | 11.902 |
| 1.00999.99 |    |      |     | H |   |        |        |        |
| ATOM       | 6  | HA2  | GLY |   | 1 | 27.540 | 1.180  | 13.275 |
| 1.00999.99 |    |      |     | H |   |        |        |        |
| ATOM       | 7  | HT1  | GLY |   | 1 | 26.871 | -1.522 | 13.047 |
| 1.00999.99 |    |      |     | H |   |        |        |        |
| ATOM       | 8  | HT2  | GLY |   | 1 | 25.869 | -0.850 | 14.244 |
| 1.00999.99 |    |      |     | H |   |        |        |        |
| ATOM       | 9  | HT3  | GLY |   | 1 | 27.559 | -0.721 | 14.376 |
| 1.00999.99 |    |      |     | H |   |        |        |        |
| ATOM       | 10 | N    | LEU |   | 2 | 24.436 | 1.087  | 12.330 |
| 1.00999.99 |    |      |     | N |   |        |        |        |
| ATOM       | 11 | CA   | LEU |   | 2 | 23.120 | 1.715  | 12.473 |
| 1.00895.59 |    |      |     | C |   |        |        |        |
| ATOM       | 12 | C    | LEU |   | 2 | 22.134 | 0.741  | 13.108 |
| 1.00532.27 |    |      |     | C |   |        |        |        |
| ATOM       | 13 | O    | LEU |   | 2 | 22.277 | -0.475 | 12.979 |
| 1.00625.21 |    |      |     | O |   |        |        |        |
| ATOM       | 14 | CB   | LEU |   | 2 | 22.595 | 2.143  | 11.101 |
| 1.00999.99 |    |      |     | C |   |        |        |        |
| ATOM       | 15 | CG   | LEU |   | 2 | 23.610 | 3.066  | 10.414 |
| 1.00999.99 |    |      |     | C |   |        |        |        |
| ATOM       | 16 | CD1  | LEU |   | 2 | 23.091 | 3.432  | 9.021  |
| 1.00999.99 |    |      |     | C |   |        |        |        |
| ATOM       | 17 | CD2  | LEU |   | 2 | 23.807 | 4.346  | 11.245 |
| 1.00999.99 |    |      |     | C |   |        |        |        |
| ATOM       | 18 | HN   | LEU |   | 2 | 24.612 | 0.523  | 11.548 |
| 1.00999.99 |    |      |     | H |   |        |        |        |
| ATOM       | 19 | HA   | LEU |   | 2 | 23.203 | 2.588  | 13.104 |
| 1.00890.87 |    |      |     | H |   |        |        |        |
| ATOM       | 20 | HB1  | LEU |   | 2 | 21.661 | 2.669  | 11.223 |
| 1.00924.07 |    |      |     | H |   |        |        |        |
| ATOM       | 21 | HB2  | LEU |   | 2 | 22.437 | 1.266  | 10.489 |
| 1.00999.99 |    |      |     | H |   |        |        |        |
| ATOM       | 22 | HG   | LEU |   | 2 | 24.554 | 2.548  | 10.318 |
| 1.00999.99 |    |      |     | H |   |        |        |        |
| ATOM       | 23 | HD11 | LEU |   | 2 | 22.758 | 2.539  | 8.514  |
| 1.00999.99 |    |      |     | H |   |        |        |        |
| ATOM       | 24 | HD12 | LEU |   | 2 | 23.884 | 3.895  | 8.452  |
| 1.00999.99 |    |      |     | H |   |        |        |        |
| ATOM       | 25 | HD13 | LEU |   | 2 | 22.266 | 4.122  | 9.114  |
| 1.00999.99 |    |      |     | H |   |        |        |        |
| ATOM       | 26 | HD21 | LEU |   | 2 | 24.523 | 4.157  | 12.031 |
| 1.00999.99 |    |      |     | H |   |        |        |        |
| ATOM       | 27 | HD22 | LEU |   | 2 | 22.865 | 4.647  | 11.681 |
| 1.00999.99 |    |      |     | H |   |        |        |        |
| ATOM       | 28 | HD23 | LEU |   | 2 | 24.177 | 5.139  | 10.611 |
| 1.00999.99 |    |      |     | H |   |        |        |        |
| ATOM       | 29 | N    | CYS |   | 3 | 21.132 | 1.282  | 13.795 |
| 1.00271.28 |    |      |     | N |   |        |        |        |
| ATOM       | 30 | CA   | CYS |   | 3 | 20.128 | 0.446  | 14.444 |

|            |    |     |     |   |   |        |        |        |      |
|------------|----|-----|-----|---|---|--------|--------|--------|------|
| 1.00104.50 |    |     |     | C |   |        |        |        |      |
| ATOM       | 31 | C   | CYS |   | 3 | 19.344 | -0.344 | 13.401 | 1.00 |
| 90.98      |    |     | C   |   |   |        |        |        |      |
| ATOM       | 32 | O   | CYS |   | 3 | 19.132 | 0.125  | 12.283 |      |
| 1.00207.28 |    |     |     | O |   |        |        |        |      |
| ATOM       | 33 | CB  | CYS |   | 3 | 19.165 | 1.317  | 15.257 | 1.00 |
| 37.83      |    |     | C   |   |   |        |        |        |      |
| ATOM       | 34 | SG  | CYS |   | 3 | 20.062 | 2.108  | 16.617 | 1.00 |
| 81.56      |    |     | S   |   |   |        |        |        |      |
| ATOM       | 35 | HN  | CYS |   | 3 | 21.066 | 2.257  | 13.864 |      |
| 1.00296.55 |    |     |     | H |   |        |        |        |      |
| ATOM       | 36 | HA  | CYS |   | 3 | 20.623 | -0.244 | 15.110 |      |
| 1.00166.45 |    |     |     | H |   |        |        |        |      |
| ATOM       | 37 | HB1 | CYS |   | 3 | 18.375 | 0.700  | 15.658 | 1.00 |
| 40.38      |    |     | H   |   |   |        |        |        |      |
| ATOM       | 38 | HB2 | CYS |   | 3 | 18.740 | 2.076  | 14.617 | 1.00 |
| 98.45      |    |     | H   |   |   |        |        |        |      |
| ATOM       | 39 | N   | SER |   | 4 | 18.918 | -1.546 | 13.773 | 1.00 |
| 85.31      |    |     | N   |   |   |        |        |        |      |
| ATOM       | 40 | CA  | SER |   | 4 | 18.160 | -2.395 | 12.860 | 1.00 |
| 92.94      |    |     | C   |   |   |        |        |        |      |
| ATOM       | 41 | C   | SER |   | 4 | 16.876 | -1.701 | 12.443 | 1.00 |
| 67.37      |    |     | C   |   |   |        |        |        |      |
| ATOM       | 42 | O   | SER |   | 4 | 16.482 | -1.737 | 11.276 |      |
| 1.00102.28 |    |     |     | O |   |        |        |        |      |
| ATOM       | 43 | CB  | SER |   | 4 | 17.786 | -3.703 | 13.549 |      |
| 1.00123.83 |    |     |     | C |   |        |        |        |      |
| ATOM       | 44 | OG  | SER |   | 4 | 17.181 | -4.575 | 12.603 |      |
| 1.00178.89 |    |     |     | O |   |        |        |        |      |
| ATOM       | 45 | HN  | SER |   | 4 | 19.118 | -1.870 | 14.676 |      |
| 1.00163.03 |    |     |     | H |   |        |        |        |      |
| ATOM       | 46 | HA  | SER |   | 4 | 18.756 | -2.609 | 11.987 |      |
| 1.00129.78 |    |     |     | H |   |        |        |        |      |
| ATOM       | 47 | HB1 | SER |   | 4 | 17.085 | -3.489 | 14.350 |      |
| 1.00105.26 |    |     |     | H |   |        |        |        |      |
| ATOM       | 48 | HB2 | SER |   | 4 | 18.667 | -4.170 | 13.955 |      |
| 1.00156.87 |    |     |     | H |   |        |        |        |      |
| ATOM       | 49 | HG  | SER |   | 4 | 17.142 | -5.452 | 12.990 |      |
| 1.00218.16 |    |     |     | H |   |        |        |        |      |
| ATOM       | 50 | N   | GLU |   | 5 | 16.216 | -1.091 | 13.418 | 1.00 |
| 41.67      |    |     | N   |   |   |        |        |        |      |
| ATOM       | 51 | CA  | GLU |   | 5 | 14.954 | -0.406 | 13.179 | 1.00 |
| 41.21      |    |     | C   |   |   |        |        |        |      |
| ATOM       | 52 | C   | GLU |   | 5 | 14.814 | 0.799  | 14.103 | 1.00 |
| 41.92      |    |     | C   |   |   |        |        |        |      |
| ATOM       | 53 | O   | GLU |   | 5 | 15.763 | 1.179  | 14.789 | 1.00 |
| 74.72      |    |     | O   |   |   |        |        |        |      |
| ATOM       | 54 | CB  | GLU |   | 5 | 13.806 | -1.379 | 13.421 | 1.00 |
| 49.24      |    |     | C   |   |   |        |        |        |      |
| ATOM       | 55 | CG  | GLU |   | 5 | 13.881 | -1.887 | 14.855 | 1.00 |
| 55.48      |    |     | C   |   |   |        |        |        |      |
| ATOM       | 56 | CD  | GLU |   | 5 | 12.907 | -3.045 | 15.054 | 1.00 |

|            |    |      |     |   |        |        |        |      |  |
|------------|----|------|-----|---|--------|--------|--------|------|--|
| 92.06      |    |      | C   |   |        |        |        |      |  |
| ATOM       | 57 | OE1  | GLU | 5 | 12.851 | -3.562 | 16.157 |      |  |
| 1.00206.49 |    |      | O   |   |        |        |        |      |  |
| ATOM       | 58 | OE2  | GLU | 5 | 12.235 | -3.398 | 14.099 |      |  |
| 1.00197.24 |    |      | O1- |   |        |        |        |      |  |
| ATOM       | 59 | HN   | GLU | 5 | 16.579 | -1.119 | 14.328 | 1.00 |  |
| 45.52      |    |      | H   |   |        |        |        |      |  |
| ATOM       | 60 | HA   | GLU | 5 | 14.915 | -0.073 | 12.161 | 1.00 |  |
| 60.63      |    |      | H   |   |        |        |        |      |  |
| ATOM       | 61 | HB1  | GLU | 5 | 13.887 | -2.214 | 12.741 | 1.00 |  |
| 61.59      |    |      | H   |   |        |        |        |      |  |
| ATOM       | 62 | HB2  | GLU | 5 | 12.869 | -0.877 | 13.266 | 1.00 |  |
| 63.66      |    |      | H   |   |        |        |        |      |  |
| ATOM       | 63 | HG1  | GLU | 5 | 13.627 | -1.085 | 15.533 | 1.00 |  |
| 58.03      |    |      | H   |   |        |        |        |      |  |
| ATOM       | 64 | HG2  | GLU | 5 | 14.885 | -2.219 | 15.052 | 1.00 |  |
| 57.77      |    |      | H   |   |        |        |        |      |  |
| ATOM       | 65 | N    | ASN | 6 | 13.629 | 1.397  | 14.117 | 1.00 |  |
| 50.73      |    |      | N   |   |        |        |        |      |  |
| ATOM       | 66 | CA   | ASN | 6 | 13.384 | 2.558  | 14.963 | 1.00 |  |
| 71.04      |    |      | C   |   |        |        |        |      |  |
| ATOM       | 67 | C    | ASN | 6 | 13.605 | 2.198  | 16.427 | 1.00 |  |
| 65.17      |    |      | C   |   |        |        |        |      |  |
| ATOM       | 68 | O    | ASN | 6 | 14.156 | 2.986  | 17.195 | 1.00 |  |
| 94.86      |    |      | O   |   |        |        |        |      |  |
| ATOM       | 69 | CB   | ASN | 6 | 11.951 | 3.058  | 14.767 | 1.00 |  |
| 94.83      |    |      | C   |   |        |        |        |      |  |
| ATOM       | 70 | CG   | ASN | 6 | 11.808 | 3.710  | 13.397 |      |  |
| 1.00160.94 |    |      | C   |   |        |        |        |      |  |
| ATOM       | 71 | ND2  | ASN | 6 | 10.623 | 3.843  | 12.867 |      |  |
| 1.00244.88 |    |      | N   |   |        |        |        |      |  |
| ATOM       | 72 | OD1  | ASN | 6 | 12.803 | 4.111  | 12.793 |      |  |
| 1.00219.73 |    |      | O   |   |        |        |        |      |  |
| ATOM       | 73 | HN   | ASN | 6 | 12.907 | 1.053  | 13.550 | 1.00 |  |
| 72.81      |    |      | H   |   |        |        |        |      |  |
| ATOM       | 74 | HA   | ASN | 6 | 14.070 | 3.346  | 14.687 | 1.00 |  |
| 96.02      |    |      | H   |   |        |        |        |      |  |
| ATOM       | 75 | HB1  | ASN | 6 | 11.716 | 3.780  | 15.534 |      |  |
| 1.00111.09 |    |      | H   |   |        |        |        |      |  |
| ATOM       | 76 | HB2  | ASN | 6 | 11.268 | 2.223  | 14.840 | 1.00 |  |
| 98.13      |    |      | H   |   |        |        |        |      |  |
| ATOM       | 77 | HD21 | ASN | 6 | 9.832  | 3.523  | 13.350 |      |  |
| 1.00272.43 |    |      | H   |   |        |        |        |      |  |
| ATOM       | 78 | HD22 | ASN | 6 | 10.524 | 4.261  | 11.988 |      |  |
| 1.00336.78 |    |      | H   |   |        |        |        |      |  |
| ATOM       | 79 | N    | GLY | 7 | 13.176 | 0.995  | 16.807 | 1.00 |  |
| 51.80      |    |      | N   |   |        |        |        |      |  |
| ATOM       | 80 | CA   | GLY | 7 | 13.332 | 0.518  | 18.183 | 1.00 |  |
| 71.47      |    |      | C   |   |        |        |        |      |  |
| ATOM       | 81 | C    | GLY | 7 | 14.015 | -0.843 | 18.205 | 1.00 |  |
| 41.04      |    |      | C   |   |        |        |        |      |  |
| ATOM       | 82 | O    | GLY | 7 | 13.376 | -1.869 | 18.429 | 1.00 |  |

|            |     |     |     |    |        |        |        |      |  |
|------------|-----|-----|-----|----|--------|--------|--------|------|--|
| 44.54      |     |     | O   |    |        |        |        |      |  |
| ATOM       | 83  | HN  | GLY | 7  | 12.749 | 0.411  | 16.146 | 1.00 |  |
| 45.49      |     |     | H   |    |        |        |        |      |  |
| ATOM       | 84  | HA1 | GLY | 7  | 12.361 | 0.429  | 18.639 |      |  |
| 1.00103.52 |     |     | H   |    |        |        |        |      |  |
| ATOM       | 85  | HA2 | GLY | 7  | 13.928 | 1.222  | 18.751 |      |  |
| 1.00108.67 |     |     | H   |    |        |        |        |      |  |
| ATOM       | 86  | N   | ASP | 8  | 15.321 | -0.838 | 17.970 | 1.00 |  |
| 27.00      |     |     | N   |    |        |        |        |      |  |
| ATOM       | 87  | CA  | ASP | 8  | 16.091 | -2.077 | 17.962 | 1.00 |  |
| 14.15      |     |     | C   |    |        |        |        |      |  |
| ATOM       | 88  | C   | ASP | 8  | 16.024 | -2.759 | 19.322 | 1.00 |  |
| 9.37       |     |     | C   |    |        |        |        |      |  |
| ATOM       | 89  | O   | ASP | 8  | 15.843 | -3.973 | 19.412 | 1.00 |  |
| 14.61      |     |     | O   |    |        |        |        |      |  |
| ATOM       | 90  | CB  | ASP | 8  | 17.550 | -1.783 | 17.606 | 1.00 |  |
| 15.06      |     |     | C   |    |        |        |        |      |  |
| ATOM       | 91  | CG  | ASP | 8  | 18.337 | -3.085 | 17.517 | 1.00 |  |
| 21.22      |     |     | C   |    |        |        |        |      |  |
| ATOM       | 92  | OD1 | ASP | 8  | 17.780 | -4.116 | 17.858 |      |  |
| 1.00119.56 |     |     | O   |    |        |        |        |      |  |
| ATOM       | 93  | OD2 | ASP | 8  | 19.486 | -3.033 | 17.108 |      |  |
| 1.00133.27 |     |     | O1- |    |        |        |        |      |  |
| ATOM       | 94  | HN  | ASP | 8  | 15.772 | 0.012  | 17.799 | 1.00 |  |
| 35.63      |     |     | H   |    |        |        |        |      |  |
| ATOM       | 95  | HA  | ASP | 8  | 15.679 | -2.738 | 17.220 | 1.00 |  |
| 20.92      |     |     | H   |    |        |        |        |      |  |
| ATOM       | 96  | HB1 | ASP | 8  | 17.985 | -1.155 | 18.370 | 1.00 |  |
| 29.39      |     |     | H   |    |        |        |        |      |  |
| ATOM       | 97  | HB2 | ASP | 8  | 17.591 | -1.273 | 16.656 | 1.00 |  |
| 44.14      |     |     | H   |    |        |        |        |      |  |
| ATOM       | 98  | N   | CYS | 9  | 16.167 | -1.967 | 20.375 | 1.00 |  |
| 5.93       |     |     | N   |    |        |        |        |      |  |
| ATOM       | 99  | CA  | CYS | 9  | 16.118 | -2.500 | 21.731 | 1.00 |  |
| 7.54       |     |     | C   |    |        |        |        |      |  |
| ATOM       | 100 | C   | CYS | 9  | 14.750 | -3.111 | 22.007 | 1.00 |  |
| 14.60      |     |     | C   |    |        |        |        |      |  |
| ATOM       | 101 | O   | CYS | 9  | 14.641 | -4.180 | 22.609 | 1.00 |  |
| 25.78      |     |     | O   |    |        |        |        |      |  |
| ATOM       | 102 | CB  | CYS | 9  | 16.402 | -1.388 | 22.730 | 1.00 |  |
| 6.63       |     |     | C   |    |        |        |        |      |  |
| ATOM       | 103 | SG  | CYS | 9  | 18.138 | -0.936 | 22.590 | 1.00 |  |
| 10.91      |     |     | S   |    |        |        |        |      |  |
| ATOM       | 104 | HN  | CYS | 9  | 16.306 | -1.008 | 20.237 | 1.00 |  |
| 6.51       |     |     | H   |    |        |        |        |      |  |
| ATOM       | 105 | HA  | CYS | 9  | 16.879 | -3.255 | 21.837 | 1.00 |  |
| 11.12      |     |     | H   |    |        |        |        |      |  |
| ATOM       | 106 | HB1 | CYS | 9  | 16.204 | -1.734 | 23.732 | 1.00 |  |
| 11.28      |     |     | H   |    |        |        |        |      |  |
| ATOM       | 107 | HB2 | CYS | 9  | 15.782 | -0.531 | 22.510 | 1.00 |  |
| 5.04       |     |     | H   |    |        |        |        |      |  |
| ATOM       | 108 | N   | ALA | 10 | 13.714 | -2.420 | 21.553 | 1.00 |  |

|            |     |     |     |    |        |        |        |      |   |
|------------|-----|-----|-----|----|--------|--------|--------|------|---|
| 16.26      |     |     | N   |    |        |        |        |      |   |
| ATOM       | 109 | CA  | ALA | 10 | 12.346 | -2.884 | 21.734 | 1.00 |   |
| 32.04      |     |     | C   |    |        |        |        |      |   |
| ATOM       | 110 | C   | ALA | 10 | 11.390 | -2.035 | 20.901 | 1.00 |   |
| 45.47      |     |     | C   |    |        |        |        |      |   |
| ATOM       | 111 | O   | ALA | 10 | 11.746 | -0.945 | 20.454 |      |   |
| 1.00119.04 |     |     |     |    |        |        |        |      | O |
| ATOM       | 112 | CB  | ALA | 10 | 11.954 | -2.818 | 23.214 | 1.00 |   |
| 30.10      |     |     | C   |    |        |        |        |      |   |
| ATOM       | 113 | HN  | ALA | 10 | 13.875 | -1.580 | 21.076 | 1.00 |   |
| 12.81      |     |     | H   |    |        |        |        |      |   |
| ATOM       | 114 | HA  | ALA | 10 | 12.279 | -3.910 | 21.403 | 1.00 |   |
| 47.14      |     |     | H   |    |        |        |        |      |   |
| ATOM       | 115 | HB1 | ALA | 10 | 11.128 | -3.487 | 23.400 | 1.00 |   |
| 84.37      |     |     | H   |    |        |        |        |      |   |
| ATOM       | 116 | HB2 | ALA | 10 | 11.662 | -1.809 | 23.468 |      |   |
| 1.00118.20 |     |     |     |    |        |        |        |      | H |
| ATOM       | 117 | HB3 | ALA | 10 | 12.797 | -3.111 | 23.822 |      |   |
| 1.00117.32 |     |     |     |    |        |        |        |      | H |
| ATOM       | 118 | N   | ALA | 11 | 10.181 | -2.540 | 20.691 | 1.00 |   |
| 30.62      |     |     | N   |    |        |        |        |      |   |
| ATOM       | 119 | CA  | ALA | 11 | 9.189  | -1.815 | 19.904 | 1.00 |   |
| 35.24      |     |     | C   |    |        |        |        |      |   |
| ATOM       | 120 | C   | ALA | 11 | 8.859  | -0.470 | 20.546 | 1.00 |   |
| 22.78      |     |     | C   |    |        |        |        |      |   |
| ATOM       | 121 | O   | ALA | 11 | 8.676  | 0.531  | 19.853 | 1.00 |   |
| 53.33      |     |     | O   |    |        |        |        |      |   |
| ATOM       | 122 | CB  | ALA | 11 | 7.911  | -2.648 | 19.784 | 1.00 |   |
| 60.49      |     |     | C   |    |        |        |        |      |   |
| ATOM       | 123 | HN  | ALA | 11 | 9.952  | -3.413 | 21.069 | 1.00 |   |
| 50.37      |     |     | H   |    |        |        |        |      |   |
| ATOM       | 124 | HA  | ALA | 11 | 9.585  | -1.643 | 18.915 | 1.00 |   |
| 41.70      |     |     | H   |    |        |        |        |      |   |
| ATOM       | 125 | HB1 | ALA | 11 | 8.169  | -3.673 | 19.564 |      |   |
| 1.00157.06 |     |     |     |    |        |        |        |      | H |
| ATOM       | 126 | HB2 | ALA | 11 | 7.297  | -2.251 | 18.990 |      |   |
| 1.00148.83 |     |     |     |    |        |        |        |      | H |
| ATOM       | 127 | HB3 | ALA | 11 | 7.365  | -2.605 | 20.716 |      |   |
| 1.00137.06 |     |     |     |    |        |        |        |      | H |
| ATOM       | 128 | N   | ASP | 12 | 8.772  | -0.457 | 21.875 | 1.00 |   |
| 18.98      |     |     | N   |    |        |        |        |      |   |
| ATOM       | 129 | CA  | ASP | 12 | 8.448  | 0.766  | 22.610 | 1.00 |   |
| 31.05      |     |     | C   |    |        |        |        |      |   |
| ATOM       | 130 | C   | ASP | 12 | 9.712  | 1.524  | 23.019 | 1.00 |   |
| 22.98      |     |     | C   |    |        |        |        |      |   |
| ATOM       | 131 | O   | ASP | 12 | 9.650  | 2.458  | 23.819 | 1.00 |   |
| 37.14      |     |     | O   |    |        |        |        |      |   |
| ATOM       | 132 | CB  | ASP | 12 | 7.638  | 0.416  | 23.859 | 1.00 |   |
| 48.35      |     |     | C   |    |        |        |        |      |   |
| ATOM       | 133 | CG  | ASP | 12 | 8.451  | -0.497 | 24.771 |      |   |
| 1.00104.83 |     |     |     |    |        |        |        |      | C |
| ATOM       | 134 | OD1 | ASP | 12 | 9.510  | -0.929 | 24.350 |      |   |

|            |     |     |     |     |        |        |        |      |  |
|------------|-----|-----|-----|-----|--------|--------|--------|------|--|
| 1.00258.73 |     |     |     | O   |        |        |        |      |  |
| ATOM       | 135 | OD2 | ASP | 12  | 8.001  | -0.751 | 25.876 |      |  |
| 1.00213.46 |     |     |     | O1- |        |        |        |      |  |
| ATOM       | 136 | HN  | ASP | 12  | 8.920  | -1.287 | 22.372 | 1.00 |  |
| 36.19      |     |     | H   |     |        |        |        |      |  |
| ATOM       | 137 | HA  | ASP | 12  | 7.848  | 1.410  | 21.982 | 1.00 |  |
| 49.76      |     |     | H   |     |        |        |        |      |  |
| ATOM       | 138 | HB1 | ASP | 12  | 6.730  | -0.090 | 23.565 | 1.00 |  |
| 95.71      |     |     | H   |     |        |        |        |      |  |
| ATOM       | 139 | HB2 | ASP | 12  | 7.387  | 1.322  | 24.390 | 1.00 |  |
| 54.37      |     |     | H   |     |        |        |        |      |  |
| ATOM       | 140 | N   | GLU | 13  | 10.860 | 1.120  | 22.469 | 1.00 |  |
| 17.60      |     |     | N   |     |        |        |        |      |  |
| ATOM       | 141 | CA  | GLU | 13  | 12.140 | 1.770  | 22.784 | 1.00 |  |
| 12.01      |     |     | C   |     |        |        |        |      |  |
| ATOM       | 142 | C   | GLU | 13  | 12.772 | 2.370  | 21.533 | 1.00 |  |
| 10.07      |     |     | C   |     |        |        |        |      |  |
| ATOM       | 143 | O   | GLU | 13  | 12.446 | 1.986  | 20.410 | 1.00 |  |
| 12.81      |     |     | O   |     |        |        |        |      |  |
| ATOM       | 144 | CB  | GLU | 13  | 13.102 | 0.758  | 23.406 | 1.00 |  |
| 11.74      |     |     | C   |     |        |        |        |      |  |
| ATOM       | 145 | CG  | GLU | 13  | 12.612 | 0.385  | 24.808 | 1.00 |  |
| 13.49      |     |     | C   |     |        |        |        |      |  |
| ATOM       | 146 | CD  | GLU | 13  | 12.798 | 1.567  | 25.752 |      |  |
| 1.00142.36 |     |     |     | C   |        |        |        |      |  |
| ATOM       | 147 | OE1 | GLU | 13  | 13.476 | 2.503  | 25.369 |      |  |
| 1.00339.06 |     |     |     | O   |        |        |        |      |  |
| ATOM       | 148 | OE2 | GLU | 13  | 12.253 | 1.521  | 26.842 |      |  |
| 1.00335.28 |     |     |     | O1- |        |        |        |      |  |
| ATOM       | 149 | HN  | GLU | 13  | 10.848 | 0.369  | 21.839 | 1.00 |  |
| 28.36      |     |     | H   |     |        |        |        |      |  |
| ATOM       | 150 | HA  | GLU | 13  | 11.973 | 2.566  | 23.498 | 1.00 |  |
| 13.06      |     |     | H   |     |        |        |        |      |  |
| ATOM       | 151 | HB1 | GLU | 13  | 14.086 | 1.192  | 23.474 | 1.00 |  |
| 13.76      |     |     | H   |     |        |        |        |      |  |
| ATOM       | 152 | HB2 | GLU | 13  | 13.141 | -0.128 | 22.788 | 1.00 |  |
| 9.94       |     |     | H   |     |        |        |        |      |  |
| ATOM       | 153 | HG1 | GLU | 13  | 13.181 | -0.457 | 25.175 | 1.00 |  |
| 66.02      |     |     | H   |     |        |        |        |      |  |
| ATOM       | 154 | HG2 | GLU | 13  | 11.567 | 0.124  | 24.765 | 1.00 |  |
| 56.23      |     |     | H   |     |        |        |        |      |  |
| ATOM       | 155 | N   | CYS | 14  | 13.681 | 3.326  | 21.743 | 1.00 |  |
| 9.12       |     |     | N   |     |        |        |        |      |  |
| ATOM       | 156 | CA  | CYS | 14  | 14.369 | 4.001  | 20.639 | 1.00 |  |
| 10.69      |     |     | C   |     |        |        |        |      |  |
| ATOM       | 157 | C   | CYS | 14  | 15.799 | 3.489  | 20.503 | 1.00 |  |
| 9.56       |     |     | C   |     |        |        |        |      |  |
| ATOM       | 158 | O   | CYS | 14  | 16.389 | 3.005  | 21.467 | 1.00 |  |
| 13.62      |     |     | O   |     |        |        |        |      |  |
| ATOM       | 159 | CB  | CYS | 14  | 14.397 | 5.508  | 20.897 | 1.00 |  |
| 13.96      |     |     | C   |     |        |        |        |      |  |
| ATOM       | 160 | SG  | CYS | 14  | 15.318 | 6.332  | 19.572 | 1.00 |  |

|            |     |      |     |    |        |       |        |      |   |
|------------|-----|------|-----|----|--------|-------|--------|------|---|
| 42.96      |     |      | S   |    |        |       |        |      |   |
| ATOM       | 161 | HN   | CYS | 14 | 13.893 | 3.588 | 22.664 | 1.00 |   |
| 9.76       |     |      | H   |    |        |       |        |      |   |
| ATOM       | 162 | HA   | CYS | 14 | 13.839 | 3.818 | 19.714 | 1.00 |   |
| 15.54      |     |      | H   |    |        |       |        |      |   |
| ATOM       | 163 | HB1  | CYS | 14 | 14.881 | 5.698 | 21.843 | 1.00 |   |
| 50.72      |     |      | H   |    |        |       |        |      |   |
| ATOM       | 164 | HB2  | CYS | 14 | 13.387 | 5.887 | 20.924 | 1.00 |   |
| 46.13      |     |      | H   |    |        |       |        |      |   |
| ATOM       | 165 | N    | CYS | 15 | 16.352 | 3.607 | 19.297 | 1.00 |   |
| 9.60       |     |      | N   |    |        |       |        |      |   |
| ATOM       | 166 | CA   | CYS | 15 | 17.719 | 3.164 | 19.031 | 1.00 |   |
| 9.28       |     |      | C   |    |        |       |        |      |   |
| ATOM       | 167 | C    | CYS | 15 | 18.358 | 4.083 | 18.001 | 1.00 |   |
| 9.92       |     |      | C   |    |        |       |        |      |   |
| ATOM       | 168 | O    | CYS | 15 | 17.790 | 4.314 | 16.933 | 1.00 |   |
| 13.31      |     |      | O   |    |        |       |        |      |   |
| ATOM       | 169 | CB   | CYS | 15 | 17.710 | 1.728 | 18.501 | 1.00 |   |
| 12.90      |     |      | C   |    |        |       |        |      |   |
| ATOM       | 170 | SG   | CYS | 15 | 19.414 | 1.149 | 18.275 | 1.00 |   |
| 39.11      |     |      | S   |    |        |       |        |      |   |
| ATOM       | 171 | HN   | CYS | 15 | 15.833 | 4.010 | 18.569 | 1.00 |   |
| 13.12      |     |      | H   |    |        |       |        |      |   |
| ATOM       | 172 | HA   | CYS | 15 | 18.297 | 3.201 | 19.944 | 1.00 |   |
| 8.26       |     |      | H   |    |        |       |        |      |   |
| ATOM       | 173 | HB1  | CYS | 15 | 17.193 | 1.698 | 17.552 | 1.00 |   |
| 24.82      |     |      | H   |    |        |       |        |      |   |
| ATOM       | 174 | HB2  | CYS | 15 | 17.205 | 1.086 | 19.207 | 1.00 |   |
| 27.31      |     |      | H   |    |        |       |        |      |   |
| ATOM       | 175 | N    | VAL | 16 | 19.536 | 4.612 | 18.316 | 1.00 |   |
| 9.56       |     |      | N   |    |        |       |        |      |   |
| ATOM       | 176 | CA   | VAL | 16 | 20.220 | 5.509 | 17.394 | 1.00 |   |
| 11.99      |     |      | C   |    |        |       |        |      |   |
| ATOM       | 177 | C    | VAL | 16 | 21.726 | 5.425 | 17.594 | 1.00 |   |
| 7.73       |     |      | C   |    |        |       |        |      |   |
| ATOM       | 178 | O    | VAL | 16 | 22.219 | 5.502 | 18.720 | 1.00 |   |
| 8.83       |     |      | O   |    |        |       |        |      |   |
| ATOM       | 179 | CB   | VAL | 16 | 19.732 | 6.942 | 17.614 | 1.00 |   |
| 18.37      |     |      | C   |    |        |       |        |      |   |
| ATOM       | 180 | CG1  | VAL | 16 | 20.062 | 7.389 | 19.039 | 1.00 |   |
| 39.61      |     |      | C   |    |        |       |        |      |   |
| ATOM       | 181 | CG2  | VAL | 16 | 20.415 | 7.872 | 16.613 |      |   |
| 1.00115.21 |     |      |     |    |        |       |        |      | C |
| ATOM       | 182 | HN   | VAL | 16 | 19.954 | 4.400 | 19.184 | 1.00 |   |
| 9.76       |     |      | H   |    |        |       |        |      |   |
| ATOM       | 183 | HA   | VAL | 16 | 19.992 | 5.217 | 16.377 | 1.00 |   |
| 17.27      |     |      | H   |    |        |       |        |      |   |
| ATOM       | 184 | HB   | VAL | 16 | 18.663 | 6.981 | 17.467 | 1.00 |   |
| 52.63      |     |      | H   |    |        |       |        |      |   |
| ATOM       | 185 | HG11 | VAL | 16 | 19.548 | 8.315 | 19.254 |      |   |
| 1.00128.07 |     |      |     |    |        |       |        |      | H |
| ATOM       | 186 | HG12 | VAL | 16 | 21.127 | 7.539 | 19.134 |      |   |



|            |     |      |     |     |    |        |        |        |      |
|------------|-----|------|-----|-----|----|--------|--------|--------|------|
| 1.00154.13 |     |      |     | H   |    |        |        |        |      |
| ATOM       | 187 | HG13 | VAL |     | 16 | 19.740 | 6.630  | 19.737 |      |
| 1.00135.74 |     |      |     | H   |    |        |        |        |      |
| ATOM       | 188 | HG21 | VAL |     | 16 | 20.307 | 7.467  | 15.618 |      |
| 1.00229.05 |     |      |     | H   |    |        |        |        |      |
| ATOM       | 189 | HG22 | VAL |     | 16 | 21.463 | 7.957  | 16.857 |      |
| 1.00261.82 |     |      |     | H   |    |        |        |        |      |
| ATOM       | 190 | HG23 | VAL |     | 16 | 19.954 | 8.847  | 16.656 |      |
| 1.00210.07 |     |      |     | H   |    |        |        |        |      |
| ATOM       | 191 | N    | ASP |     | 17 | 22.456 | 5.252  | 16.494 | 1.00 |
| 14.34      |     |      |     | N   |    |        |        |        |      |
| ATOM       | 192 | CA   | ASP |     | 17 | 23.914 | 5.141  | 16.552 | 1.00 |
| 11.90      |     |      |     | C   |    |        |        |        |      |
| ATOM       | 193 | C    | ASP |     | 17 | 24.581 | 6.404  | 16.023 | 1.00 |
| 13.15      |     |      |     | C   |    |        |        |        |      |
| ATOM       | 194 | O    | ASP |     | 17 | 24.360 | 6.807  | 14.880 | 1.00 |
| 25.96      |     |      |     | O   |    |        |        |        |      |
| ATOM       | 195 | CB   | ASP |     | 17 | 24.373 | 3.940  | 15.722 | 1.00 |
| 20.80      |     |      |     | C   |    |        |        |        |      |
| ATOM       | 196 | CG   | ASP |     | 17 | 23.743 | 2.662  | 16.266 | 1.00 |
| 28.72      |     |      |     | C   |    |        |        |        |      |
| ATOM       | 197 | OD1  | ASP |     | 17 | 23.230 | 1.894  | 15.471 |      |
| 1.00135.42 |     |      |     | O   |    |        |        |        |      |
| ATOM       | 198 | OD2  | ASP |     | 17 | 23.786 | 2.470  | 17.470 |      |
| 1.00114.17 |     |      |     | O1- |    |        |        |        |      |
| ATOM       | 199 | HN   | ASP |     | 17 | 22.005 | 5.189  | 15.626 | 1.00 |
| 28.29      |     |      |     | H   |    |        |        |        |      |
| ATOM       | 200 | HA   | ASP |     | 17 | 24.224 | 4.989  | 17.574 | 1.00 |
| 10.49      |     |      |     | H   |    |        |        |        |      |
| ATOM       | 201 | HB1  | ASP |     | 17 | 25.449 | 3.860  | 15.775 | 1.00 |
| 22.42      |     |      |     | H   |    |        |        |        |      |
| ATOM       | 202 | HB2  | ASP |     | 17 | 24.073 | 4.079  | 14.694 | 1.00 |
| 29.52      |     |      |     | H   |    |        |        |        |      |
| ATOM       | 203 | N    | THR |     | 18 | 25.419 | 7.010  | 16.860 | 1.00 |
| 11.55      |     |      |     | N   |    |        |        |        |      |
| ATOM       | 204 | CA   | THR |     | 18 | 26.152 | 8.218  | 16.486 | 1.00 |
| 17.10      |     |      |     | C   |    |        |        |        |      |
| ATOM       | 205 | C    | THR |     | 18 | 27.629 | 7.891  | 16.337 | 1.00 |
| 10.63      |     |      |     | C   |    |        |        |        |      |
| ATOM       | 206 | O    | THR |     | 18 | 28.097 | 6.872  | 16.845 | 1.00 |
| 6.49       |     |      |     | O   |    |        |        |        |      |
| ATOM       | 207 | CB   | THR |     | 18 | 25.974 | 9.301  | 17.553 | 1.00 |
| 28.52      |     |      |     | C   |    |        |        |        |      |
| ATOM       | 208 | CG2  | THR |     | 18 | 24.566 | 9.885  | 17.469 | 1.00 |
| 45.38      |     |      |     | C   |    |        |        |        |      |
| ATOM       | 209 | OG1  | THR |     | 18 | 26.184 | 8.736  | 18.838 | 1.00 |
| 26.49      |     |      |     | O   |    |        |        |        |      |
| ATOM       | 210 | HN   | THR |     | 18 | 25.561 | 6.625  | 17.750 | 1.00 |
| 13.96      |     |      |     | H   |    |        |        |        |      |
| ATOM       | 211 | HA   | THR |     | 18 | 25.780 | 8.593  | 15.540 | 1.00 |
| 26.43      |     |      |     | H   |    |        |        |        |      |
| ATOM       | 212 | HB   | THR |     | 18 | 26.692 | 10.089 | 17.387 | 1.00 |

|            |     |      |     |    |        |        |        |      |   |
|------------|-----|------|-----|----|--------|--------|--------|------|---|
| 37.43      |     |      | H   |    |        |        |        |      |   |
| ATOM       | 213 | HG1  | THR | 18 | 26.187 | 7.780  | 18.744 | 1.00 |   |
| 71.62      |     |      | H   |    |        |        |        |      |   |
| ATOM       | 214 | HG21 | THR | 18 | 24.352 | 10.438 | 18.371 |      |   |
| 1.00100.44 |     |      |     |    |        |        |        |      | H |
| ATOM       | 215 | HG22 | THR | 18 | 23.849 | 9.086  | 17.357 |      |   |
| 1.00129.42 |     |      |     |    |        |        |        |      | H |
| ATOM       | 216 | HG23 | THR | 18 | 24.502 | 10.548 | 16.617 |      |   |
| 1.00156.21 |     |      |     |    |        |        |        |      | H |
| ATOM       | 217 | N    | VAL | 19 | 28.360 | 8.763  | 15.657 | 1.00 |   |
| 16.32      |     |      | N   |    |        |        |        |      |   |
| ATOM       | 218 | CA   | VAL | 19 | 29.773 | 8.570  | 15.456 | 1.00 |   |
| 13.34      |     |      | C   |    |        |        |        |      |   |
| ATOM       | 219 | C    | VAL | 19 | 30.341 | 9.740  | 14.685 | 1.00 |   |
| 25.88      |     |      | C   |    |        |        |        |      |   |
| ATOM       | 220 | O    | VAL | 19 | 29.983 | 10.000 | 13.537 | 1.00 |   |
| 42.11      |     |      | O   |    |        |        |        |      |   |
| ATOM       | 221 | CB   | VAL | 19 | 30.068 | 7.271  | 14.708 | 1.00 |   |
| 15.48      |     |      | C   |    |        |        |        |      |   |
| ATOM       | 222 | CG1  | VAL | 19 | 29.257 | 7.212  | 13.407 | 1.00 |   |
| 29.06      |     |      | C   |    |        |        |        |      |   |
| ATOM       | 223 | CG2  | VAL | 19 | 31.567 | 7.216  | 14.385 | 1.00 |   |
| 20.67      |     |      | C   |    |        |        |        |      |   |
| ATOM       | 224 | HN   | VAL | 19 | 27.945 | 9.566  | 15.291 | 1.00 |   |
| 26.89      |     |      | H   |    |        |        |        |      |   |
| ATOM       | 225 | HA   | VAL | 19 | 30.253 | 8.526  | 16.423 | 1.00 |   |
| 8.08       |     |      | H   |    |        |        |        |      |   |
| ATOM       | 226 | HB   | VAL | 19 | 29.803 | 6.435  | 15.334 | 1.00 |   |
| 11.49      |     |      | H   |    |        |        |        |      |   |
| ATOM       | 227 | HG11 | VAL | 19 | 29.229 | 6.194  | 13.048 |      |   |
| 1.00137.43 |     |      |     |    |        |        |        |      | H |
| ATOM       | 228 | HG12 | VAL | 19 | 29.722 | 7.842  | 12.662 | 1.00 |   |
| 93.29      |     |      | H   |    |        |        |        |      |   |
| ATOM       | 229 | HG13 | VAL | 19 | 28.251 | 7.556  | 13.591 |      |   |
| 1.00108.69 |     |      |     |    |        |        |        |      | H |
| ATOM       | 230 | HG21 | VAL | 19 | 31.843 | 6.210  | 14.107 | 1.00 |   |
| 99.42      |     |      | H   |    |        |        |        |      |   |
| ATOM       | 231 | HG22 | VAL | 19 | 32.134 | 7.521  | 15.255 |      |   |
| 1.00111.36 |     |      |     |    |        |        |        |      | H |
| ATOM       | 232 | HG23 | VAL | 19 | 31.782 | 7.889  | 13.568 | 1.00 |   |
| 77.11      |     |      | H   |    |        |        |        |      |   |
| ATOM       | 233 | N    | PHE | 20 | 31.227 | 10.437 | 15.347 | 1.00 |   |
| 24.58      |     |      | N   |    |        |        |        |      |   |
| ATOM       | 234 | CA   | PHE | 20 | 31.885 | 11.601 | 14.782 | 1.00 |   |
| 40.34      |     |      | C   |    |        |        |        |      |   |
| ATOM       | 235 | C    | PHE | 20 | 33.254 | 11.232 | 14.232 | 1.00 |   |
| 40.37      |     |      | C   |    |        |        |        |      |   |
| ATOM       | 236 | O    | PHE | 20 | 33.545 | 11.464 | 13.058 | 1.00 |   |
| 66.02      |     |      | O   |    |        |        |        |      |   |
| ATOM       | 237 | CB   | PHE | 20 | 32.025 | 12.682 | 15.864 | 1.00 |   |
| 48.79      |     |      | C   |    |        |        |        |      |   |
| ATOM       | 238 | CG   | PHE | 20 | 32.212 | 12.056 | 17.237 | 1.00 |   |

|            |     |     |     |    |        |        |        |      |
|------------|-----|-----|-----|----|--------|--------|--------|------|
| 35.75      |     |     | C   |    |        |        |        |      |
| ATOM       | 239 | CD1 | PHE | 20 | 31.162 | 11.344 | 17.850 | 1.00 |
| 30.20      |     |     | C   |    |        |        |        |      |
| ATOM       | 240 | CD2 | PHE | 20 | 33.431 | 12.206 | 17.911 | 1.00 |
| 40.95      |     |     | C   |    |        |        |        |      |
| ATOM       | 241 | CE1 | PHE | 20 | 31.343 | 10.789 | 19.121 | 1.00 |
| 30.41      |     |     | C   |    |        |        |        |      |
| ATOM       | 242 | CE2 | PHE | 20 | 33.607 | 11.646 | 19.181 | 1.00 |
| 45.84      |     |     | C   |    |        |        |        |      |
| ATOM       | 243 | CZ  | PHE | 20 | 32.564 | 10.939 | 19.785 | 1.00 |
| 40.81      |     |     | C   |    |        |        |        |      |
| ATOM       | 244 | HN  | PHE | 20 | 31.437 | 10.161 | 16.254 | 1.00 |
| 16.73      |     |     | H   |    |        |        |        |      |
| ATOM       | 245 | HA  | PHE | 20 | 31.284 | 11.995 | 13.971 | 1.00 |
| 59.91      |     |     | H   |    |        |        |        |      |
| ATOM       | 246 | HB1 | PHE | 20 | 31.140 | 13.272 | 15.873 | 1.00 |
| 67.15      |     |     | H   |    |        |        |        |      |
| ATOM       | 247 | HB2 | PHE | 20 | 32.868 | 13.321 | 15.640 | 1.00 |
| 58.17      |     |     | H   |    |        |        |        |      |
| ATOM       | 248 | HD1 | PHE | 20 | 30.215 | 11.216 | 17.342 | 1.00 |
| 33.34      |     |     | H   |    |        |        |        |      |
| ATOM       | 249 | HD2 | PHE | 20 | 34.240 | 12.751 | 17.446 | 1.00 |
| 49.35      |     |     | H   |    |        |        |        |      |
| ATOM       | 250 | HE1 | PHE | 20 | 30.538 | 10.245 | 19.588 | 1.00 |
| 30.61      |     |     | H   |    |        |        |        |      |
| ATOM       | 251 | HE2 | PHE | 20 | 34.550 | 11.762 | 19.695 | 1.00 |
| 61.27      |     |     | H   |    |        |        |        |      |
| ATOM       | 252 | HZ  | PHE | 20 | 32.700 | 10.510 | 20.767 | 1.00 |
| 52.66      |     |     | H   |    |        |        |        |      |
| ATOM       | 253 | N   | GLU | 21 | 34.105 | 10.687 | 15.096 | 1.00 |
| 41.31      |     |     | N   |    |        |        |        |      |
| ATOM       | 254 | CA  | GLU | 21 | 35.450 | 10.325 | 14.715 | 1.00 |
| 56.16      |     |     | C   |    |        |        |        |      |
| ATOM       | 255 | C   | GLU | 21 | 35.673 | 8.824  | 14.822 | 1.00 |
| 58.61      |     |     | C   |    |        |        |        |      |
| ATOM       | 256 | O   | GLU | 21 | 34.759 | 8.063  | 15.136 |      |
| 1.00201.19 |     |     | O   |    |        |        |        |      |
| ATOM       | 257 | CB  | GLU | 21 | 36.386 | 11.059 | 15.646 | 1.00 |
| 57.37      |     |     | C   |    |        |        |        |      |
| ATOM       | 258 | CG  | GLU | 21 | 36.239 | 10.513 | 17.067 |      |
| 1.00193.56 |     |     | C   |    |        |        |        |      |
| ATOM       | 259 | CD  | GLU | 21 | 36.927 | 11.449 | 18.056 |      |
| 1.00304.62 |     |     | C   |    |        |        |        |      |
| ATOM       | 260 | OE1 | GLU | 21 | 36.795 | 11.223 | 19.247 |      |
| 1.00451.81 |     |     | O   |    |        |        |        |      |
| ATOM       | 261 | OE2 | GLU | 21 | 37.576 | 12.380 | 17.606 |      |
| 1.00442.88 |     |     | O1- |    |        |        |        |      |
| ATOM       | 262 | HN  | GLU | 21 | 33.837 | 10.554 | 16.023 | 1.00 |
| 50.82      |     |     | H   |    |        |        |        |      |
| ATOM       | 263 | HA  | GLU | 21 | 35.651 | 10.641 | 13.700 | 1.00 |
| 85.72      |     |     | H   |    |        |        |        |      |
| ATOM       | 264 | HB1 | GLU | 21 | 36.128 | 12.103 | 15.638 | 1.00 |

|            |     |     |     |    |        |        |        |      |  |  |
|------------|-----|-----|-----|----|--------|--------|--------|------|--|--|
| 46.37      |     |     | H   |    |        |        |        |      |  |  |
| ATOM       | 265 | HB2 | GLU | 21 | 37.391 | 10.929 | 15.311 |      |  |  |
| 1.00131.81 |     |     |     |    |        |        |        | H    |  |  |
| ATOM       | 266 | HG1 | GLU | 21 | 36.694 | 9.539  | 17.122 |      |  |  |
| 1.00314.91 |     |     |     |    |        |        |        | H    |  |  |
| ATOM       | 267 | HG2 | GLU | 21 | 35.194 | 10.430 | 17.313 |      |  |  |
| 1.00266.92 |     |     |     |    |        |        |        | H    |  |  |
| ATOM       | 268 | N   | GLY | 22 | 36.905 | 8.416  | 14.553 | 1.00 |  |  |
| 86.70      |     |     | N   |    |        |        |        |      |  |  |
| ATOM       | 269 | CA  | GLY | 22 | 37.273 | 6.999  | 14.609 |      |  |  |
| 1.00104.66 |     |     |     |    |        |        |        | C    |  |  |
| ATOM       | 270 | C   | GLY | 22 | 37.848 | 6.636  | 15.974 | 1.00 |  |  |
| 71.50      |     |     | C   |    |        |        |        |      |  |  |
| ATOM       | 271 | O   | GLY | 22 | 38.014 | 5.460  | 16.296 | 1.00 |  |  |
| 89.87      |     |     | O   |    |        |        |        |      |  |  |
| ATOM       | 272 | HN  | GLY | 22 | 37.581 | 9.086  | 14.311 |      |  |  |
| 1.00214.64 |     |     |     |    |        |        |        | H    |  |  |
| ATOM       | 273 | HA1 | GLY | 22 | 38.018 | 6.799  | 13.852 |      |  |  |
| 1.00152.47 |     |     |     |    |        |        |        | H    |  |  |
| ATOM       | 274 | HA2 | GLY | 22 | 36.400 | 6.390  | 14.417 |      |  |  |
| 1.00118.15 |     |     |     |    |        |        |        | H    |  |  |
| ATOM       | 275 | N   | ASP | 23 | 38.156 | 7.655  | 16.767 | 1.00 |  |  |
| 44.68      |     |     | N   |    |        |        |        |      |  |  |
| ATOM       | 276 | CA  | ASP | 23 | 38.719 | 7.439  | 18.094 | 1.00 |  |  |
| 43.33      |     |     | C   |    |        |        |        |      |  |  |
| ATOM       | 277 | C   | ASP | 23 | 37.755 | 6.663  | 18.982 | 1.00 |  |  |
| 37.55      |     |     | C   |    |        |        |        |      |  |  |
| ATOM       | 278 | O   | ASP | 23 | 38.152 | 5.740  | 19.693 | 1.00 |  |  |
| 61.37      |     |     | O   |    |        |        |        |      |  |  |
| ATOM       | 279 | CB  | ASP | 23 | 39.034 | 8.786  | 18.746 | 1.00 |  |  |
| 40.74      |     |     | C   |    |        |        |        |      |  |  |
| ATOM       | 280 | CG  | ASP | 23 | 39.790 | 8.571  | 20.052 |      |  |  |
| 1.00141.86 |     |     |     |    |        |        |        | C    |  |  |
| ATOM       | 281 | OD1 | ASP | 23 | 39.862 | 7.436  | 20.491 |      |  |  |
| 1.00328.18 |     |     |     |    |        |        |        | O    |  |  |
| ATOM       | 282 | OD2 | ASP | 23 | 40.285 | 9.545  | 20.594 |      |  |  |
| 1.00304.58 |     |     |     |    |        |        |        | O1-  |  |  |
| ATOM       | 283 | HN  | ASP | 23 | 38.008 | 8.568  | 16.450 | 1.00 |  |  |
| 40.86      |     |     | H   |    |        |        |        |      |  |  |
| ATOM       | 284 | HA  | ASP | 23 | 39.632 | 6.879  | 18.000 | 1.00 |  |  |
| 72.12      |     |     | H   |    |        |        |        |      |  |  |
| ATOM       | 285 | HB1 | ASP | 23 | 38.109 | 9.305  | 18.950 | 1.00 |  |  |
| 94.15      |     |     | H   |    |        |        |        |      |  |  |
| ATOM       | 286 | HB2 | ASP | 23 | 39.635 | 9.379  | 18.073 | 1.00 |  |  |
| 93.26      |     |     | H   |    |        |        |        |      |  |  |
| ATOM       | 287 | N   | MET | 24 | 36.485 | 7.051  | 18.944 | 1.00 |  |  |
| 23.24      |     |     | N   |    |        |        |        |      |  |  |
| ATOM       | 288 | CA  | MET | 24 | 35.464 | 6.394  | 19.758 | 1.00 |  |  |
| 32.50      |     |     | C   |    |        |        |        |      |  |  |
| ATOM       | 289 | C   | MET | 24 | 34.085 | 6.540  | 19.124 | 1.00 |  |  |
| 25.13      |     |     | C   |    |        |        |        |      |  |  |
| ATOM       | 290 | O   | MET | 24 | 33.772 | 7.566  | 18.521 | 1.00 |  |  |

|            |     |      |     |    |        |       |        |      |  |
|------------|-----|------|-----|----|--------|-------|--------|------|--|
| 54.40      |     |      | O   |    |        |       |        |      |  |
| ATOM       | 291 | CB   | MET | 24 | 35.452 | 7.006 | 21.162 | 1.00 |  |
| 47.36      |     |      | C   |    |        |       |        |      |  |
| ATOM       | 292 | CG   | MET | 24 | 34.404 | 6.297 | 22.025 |      |  |
| 1.00151.73 |     |      | C   |    |        |       |        |      |  |
| ATOM       | 293 | SD   | MET | 24 | 34.517 | 6.902 | 23.730 |      |  |
| 1.00209.23 |     |      | S   |    |        |       |        |      |  |
| ATOM       | 294 | CE   | MET | 24 | 33.888 | 8.575 | 23.434 |      |  |
| 1.00243.29 |     |      | C   |    |        |       |        |      |  |
| ATOM       | 295 | HN   | MET | 24 | 36.232 | 7.799 | 18.363 | 1.00 |  |
| 17.32      |     |      | H   |    |        |       |        |      |  |
| ATOM       | 296 | HA   | MET | 24 | 35.701 | 5.342 | 19.841 | 1.00 |  |
| 48.94      |     |      | H   |    |        |       |        |      |  |
| ATOM       | 297 | HB1  | MET | 24 | 35.208 | 8.055 | 21.093 |      |  |
| 1.00124.40 |     |      | H   |    |        |       |        |      |  |
| ATOM       | 298 | HB2  | MET | 24 | 36.427 | 6.892 | 21.613 |      |  |
| 1.00166.96 |     |      | H   |    |        |       |        |      |  |
| ATOM       | 299 | HG1  | MET | 24 | 34.586 | 5.233 | 22.010 |      |  |
| 1.00331.71 |     |      | H   |    |        |       |        |      |  |
| ATOM       | 300 | HG2  | MET | 24 | 33.417 | 6.499 | 21.637 |      |  |
| 1.00302.30 |     |      | H   |    |        |       |        |      |  |
| ATOM       | 301 | HE1  | MET | 24 | 33.503 | 8.982 | 24.359 |      |  |
| 1.00340.44 |     |      | H   |    |        |       |        |      |  |
| ATOM       | 302 | HE2  | MET | 24 | 33.099 | 8.544 | 22.701 |      |  |
| 1.00373.88 |     |      | H   |    |        |       |        |      |  |
| ATOM       | 303 | HE3  | MET | 24 | 34.692 | 9.202 | 23.069 |      |  |
| 1.00386.81 |     |      | H   |    |        |       |        |      |  |
| ATOM       | 304 | N    | VAL | 25 | 33.259 | 5.502 | 19.274 | 1.00 |  |
| 22.44      |     |      | N   |    |        |       |        |      |  |
| ATOM       | 305 | CA   | VAL | 25 | 31.900 | 5.509 | 18.722 | 1.00 |  |
| 15.37      |     |      | C   |    |        |       |        |      |  |
| ATOM       | 306 | C    | VAL | 25 | 30.872 | 5.669 | 19.837 | 1.00 |  |
| 17.47      |     |      | C   |    |        |       |        |      |  |
| ATOM       | 307 | O    | VAL | 25 | 31.041 | 5.146 | 20.939 | 1.00 |  |
| 29.52      |     |      | O   |    |        |       |        |      |  |
| ATOM       | 308 | CB   | VAL | 25 | 31.627 | 4.207 | 17.963 | 1.00 |  |
| 23.36      |     |      | C   |    |        |       |        |      |  |
| ATOM       | 309 | CG1  | VAL | 25 | 30.152 | 4.158 | 17.532 | 1.00 |  |
| 58.39      |     |      | C   |    |        |       |        |      |  |
| ATOM       | 310 | CG2  | VAL | 25 | 32.527 | 4.148 | 16.724 | 1.00 |  |
| 55.25      |     |      | C   |    |        |       |        |      |  |
| ATOM       | 311 | HN   | VAL | 25 | 33.568 | 4.716 | 19.769 | 1.00 |  |
| 48.11      |     |      | H   |    |        |       |        |      |  |
| ATOM       | 312 | HA   | VAL | 25 | 31.794 | 6.340 | 18.034 | 1.00 |  |
| 9.25       |     |      | H   |    |        |       |        |      |  |
| ATOM       | 313 | HB   | VAL | 25 | 31.841 | 3.365 | 18.606 | 1.00 |  |
| 52.45      |     |      | H   |    |        |       |        |      |  |
| ATOM       | 314 | HG11 | VAL | 25 | 29.551 | 3.807 | 18.357 |      |  |
| 1.00171.07 |     |      | H   |    |        |       |        |      |  |
| ATOM       | 315 | HG12 | VAL | 25 | 30.035 | 3.487 | 16.693 |      |  |
| 1.00166.22 |     |      | H   |    |        |       |        |      |  |
| ATOM       | 316 | HG13 | VAL | 25 | 29.823 | 5.149 | 17.247 |      |  |

|            |     |      |     |   |    |        |       |        |      |  |
|------------|-----|------|-----|---|----|--------|-------|--------|------|--|
| 1.00134.76 |     |      |     | H |    |        |       |        |      |  |
| ATOM       | 317 | HG21 | VAL |   | 25 | 32.154 | 4.830 | 15.975 |      |  |
| 1.00141.88 |     |      |     | H |    |        |       |        |      |  |
| ATOM       | 318 | HG22 | VAL |   | 25 | 32.528 | 3.144 | 16.327 |      |  |
| 1.00184.50 |     |      |     | H |    |        |       |        |      |  |
| ATOM       | 319 | HG23 | VAL |   | 25 | 33.535 | 4.428 | 16.996 |      |  |
| 1.00133.90 |     |      |     | H |    |        |       |        |      |  |
| ATOM       | 320 | N    | THR |   | 26 | 29.808 | 6.410 | 19.536 | 1.00 |  |
| 13.60      |     |      | N   |   |    |        |       |        |      |  |
| ATOM       | 321 | CA   | THR |   | 26 | 28.739 | 6.667 | 20.504 | 1.00 |  |
| 21.19      |     |      | C   |   |    |        |       |        |      |  |
| ATOM       | 322 | C    | THR |   | 26 | 27.421 | 6.041 | 20.047 | 1.00 |  |
| 16.55      |     |      | C   |   |    |        |       |        |      |  |
| ATOM       | 323 | O    | THR |   | 26 | 27.014 | 6.195 | 18.896 | 1.00 |  |
| 11.43      |     |      | O   |   |    |        |       |        |      |  |
| ATOM       | 324 | CB   | THR |   | 26 | 28.561 | 8.174 | 20.655 | 1.00 |  |
| 27.07      |     |      | C   |   |    |        |       |        |      |  |
| ATOM       | 325 | CG2  | THR |   | 26 | 27.393 | 8.470 | 21.596 | 1.00 |  |
| 44.39      |     |      | C   |   |    |        |       |        |      |  |
| ATOM       | 326 | OG1  | THR |   | 26 | 29.755 | 8.732 | 21.185 | 1.00 |  |
| 34.75      |     |      | O   |   |    |        |       |        |      |  |
| ATOM       | 327 | HN   | THR |   | 26 | 29.741 | 6.803 | 18.641 | 1.00 |  |
| 10.81      |     |      | H   |   |    |        |       |        |      |  |
| ATOM       | 328 | HA   | THR |   | 26 | 29.008 | 6.251 | 21.464 | 1.00 |  |
| 33.16      |     |      | H   |   |    |        |       |        |      |  |
| ATOM       | 329 | HB   | THR |   | 26 | 28.364 | 8.606 | 19.683 | 1.00 |  |
| 20.60      |     |      | H   |   |    |        |       |        |      |  |
| ATOM       | 330 | HG1  | THR |   | 26 | 30.483 | 8.469 | 20.617 | 1.00 |  |
| 77.72      |     |      | H   |   |    |        |       |        |      |  |
| ATOM       | 331 | HG21 | THR |   | 26 | 27.497 | 7.882 | 22.496 |      |  |
| 1.00126.99 |     |      |     | H |    |        |       |        |      |  |
| ATOM       | 332 | HG22 | THR |   | 26 | 26.462 | 8.219 | 21.109 |      |  |
| 1.00108.32 |     |      |     | H |    |        |       |        |      |  |
| ATOM       | 333 | HG23 | THR |   | 26 | 27.393 | 9.519 | 21.850 |      |  |
| 1.00151.99 |     |      |     | H |    |        |       |        |      |  |
| ATOM       | 334 | N    | ARG |   | 27 | 26.758 | 5.337 | 20.967 | 1.00 |  |
| 22.38      |     |      | N   |   |    |        |       |        |      |  |
| ATOM       | 335 | CA   | ARG |   | 27 | 25.476 | 4.687 | 20.674 | 1.00 |  |
| 20.21      |     |      | C   |   |    |        |       |        |      |  |
| ATOM       | 336 | C    | ARG |   | 27 | 24.472 | 4.994 | 21.781 | 1.00 |  |
| 16.96      |     |      | C   |   |    |        |       |        |      |  |
| ATOM       | 337 | O    | ARG |   | 27 | 24.861 | 5.284 | 22.912 | 1.00 |  |
| 20.06      |     |      | O   |   |    |        |       |        |      |  |
| ATOM       | 338 | CB   | ARG |   | 27 | 25.676 | 3.172 | 20.574 | 1.00 |  |
| 22.14      |     |      | C   |   |    |        |       |        |      |  |
| ATOM       | 339 | CG   | ARG |   | 27 | 26.646 | 2.856 | 19.434 |      |  |
| 1.00124.30 |     |      |     | C |    |        |       |        |      |  |
| ATOM       | 340 | CD   | ARG |   | 27 | 26.806 | 1.340 | 19.306 |      |  |
| 1.00109.38 |     |      |     | C |    |        |       |        |      |  |
| ATOM       | 341 | NE   | ARG |   | 27 | 27.792 | 1.021 | 18.280 |      |  |
| 1.00227.73 |     |      |     | N |    |        |       |        |      |  |
| ATOM       | 342 | CZ   | ARG |   | 27 | 27.466 | 1.004 | 16.992 |      |  |

|            |     |      |     |     |    |        |       |        |      |
|------------|-----|------|-----|-----|----|--------|-------|--------|------|
| 1.00426.12 |     |      |     | C   |    |        |       |        |      |
| ATOM       | 343 | NH1  | ARG |     | 27 | 28.367 | 0.714 | 16.094 |      |
| 1.00767.09 |     |      |     | N1+ |    |        |       |        |      |
| ATOM       | 344 | NH2  | ARG |     | 27 | 26.244 | 1.279 | 16.625 |      |
| 1.00581.78 |     |      |     | N   |    |        |       |        |      |
| ATOM       | 345 | HN   | ARG |     | 27 | 27.137 | 5.258 | 21.868 | 1.00 |
| 30.75      |     |      |     | H   |    |        |       |        |      |
| ATOM       | 346 | HA   | ARG |     | 27 | 25.087 | 5.052 | 19.736 | 1.00 |
| 23.13      |     |      |     | H   |    |        |       |        |      |
| ATOM       | 347 | HB1  | ARG |     | 27 | 24.727 | 2.696 | 20.380 | 1.00 |
| 87.46      |     |      |     | H   |    |        |       |        |      |
| ATOM       | 348 | HB2  | ARG |     | 27 | 26.080 | 2.800 | 21.505 |      |
| 1.00103.36 |     |      |     | H   |    |        |       |        |      |
| ATOM       | 349 | HG1  | ARG |     | 27 | 27.607 | 3.300 | 19.644 |      |
| 1.00281.97 |     |      |     | H   |    |        |       |        |      |
| ATOM       | 350 | HG2  | ARG |     | 27 | 26.258 | 3.257 | 18.510 |      |
| 1.00276.19 |     |      |     | H   |    |        |       |        |      |
| ATOM       | 351 | HD1  | ARG |     | 27 | 25.854 | 0.901 | 19.041 |      |
| 1.00183.60 |     |      |     | H   |    |        |       |        |      |
| ATOM       | 352 | HD2  | ARG |     | 27 | 27.132 | 0.933 | 20.251 |      |
| 1.00142.93 |     |      |     | H   |    |        |       |        |      |
| ATOM       | 353 | HE   | ARG |     | 27 | 28.713 | 0.814 | 18.546 |      |
| 1.00372.53 |     |      |     | H   |    |        |       |        |      |
| ATOM       | 354 | HH11 | ARG |     | 27 | 29.304 | 0.505 | 16.375 |      |
| 1.00910.59 |     |      |     | H   |    |        |       |        |      |
| ATOM       | 355 | HH12 | ARG |     | 27 | 28.121 | 0.703 | 15.125 |      |
| 1.00999.99 |     |      |     | H   |    |        |       |        |      |
| ATOM       | 356 | HH21 | ARG |     | 27 | 25.554 | 1.501 | 17.314 |      |
| 1.00532.54 |     |      |     | H   |    |        |       |        |      |
| ATOM       | 357 | HH22 | ARG |     | 27 | 25.998 | 1.267 | 15.656 |      |
| 1.00948.84 |     |      |     | H   |    |        |       |        |      |
| ATOM       | 358 | N    | SER |     | 28 | 23.176 | 4.931 | 21.459 | 1.00 |
| 14.60      |     |      |     | N   |    |        |       |        |      |
| ATOM       | 359 | CA   | SER |     | 28 | 22.140 | 5.210 | 22.455 | 1.00 |
| 14.92      |     |      |     | C   |    |        |       |        |      |
| ATOM       | 360 | C    | SER |     | 28 | 20.926 | 4.316 | 22.235 | 1.00 |
| 12.12      |     |      |     | C   |    |        |       |        |      |
| ATOM       | 361 | O    | SER |     | 28 | 20.588 | 3.974 | 21.100 | 1.00 |
| 13.41      |     |      |     | O   |    |        |       |        |      |
| ATOM       | 362 | CB   | SER |     | 28 | 21.718 | 6.677 | 22.377 | 1.00 |
| 23.26      |     |      |     | C   |    |        |       |        |      |
| ATOM       | 363 | OG   | SER |     | 28 | 20.679 | 6.917 | 23.317 |      |
| 1.00146.32 |     |      |     | O   |    |        |       |        |      |
| ATOM       | 364 | HN   | SER |     | 28 | 22.910 | 4.695 | 20.542 | 1.00 |
| 15.23      |     |      |     | H   |    |        |       |        |      |
| ATOM       | 365 | HA   | SER |     | 28 | 22.533 | 5.017 | 23.443 | 1.00 |
| 15.44      |     |      |     | H   |    |        |       |        |      |
| ATOM       | 366 | HB1  | SER |     | 28 | 21.372 | 6.897 | 21.378 | 1.00 |
| 88.73      |     |      |     | H   |    |        |       |        |      |
| ATOM       | 367 | HB2  | SER |     | 28 | 22.558 | 7.306 | 22.610 |      |
| 1.00124.68 |     |      |     | H   |    |        |       |        |      |
| ATOM       | 368 | HG   | SER |     | 28 | 20.886 | 7.726 | 23.789 |      |

|            |     |     |     |     |        |       |        |      |  |
|------------|-----|-----|-----|-----|--------|-------|--------|------|--|
| 1.00242.47 |     |     |     | H   |        |       |        |      |  |
| ATOM       | 369 | N   | CYS | 29  | 20.279 | 3.943 | 23.330 | 1.00 |  |
| 10.48      |     |     | N   |     |        |       |        |      |  |
| ATOM       | 370 | CA  | CYS | 29  | 19.103 | 3.086 | 23.267 | 1.00 |  |
| 9.97       |     |     | C   |     |        |       |        |      |  |
| ATOM       | 371 | C   | CYS | 29  | 18.483 | 2.955 | 24.657 | 1.00 |  |
| 11.60      |     |     | C   |     |        |       |        |      |  |
| ATOM       | 372 | O   | CYS | 29  | 19.118 | 2.441 | 25.580 | 1.00 |  |
| 15.64      |     |     | O   |     |        |       |        |      |  |
| ATOM       | 373 | CB  | CYS | 29  | 19.493 | 1.699 | 22.731 | 1.00 |  |
| 9.52       |     |     | C   |     |        |       |        |      |  |
| ATOM       | 374 | SG  | CYS | 29  | 18.083 | 0.953 | 21.900 | 1.00 |  |
| 10.40      |     |     | S   |     |        |       |        |      |  |
| ATOM       | 375 | HN  | CYS | 29  | 20.598 | 4.255 | 24.203 | 1.00 |  |
| 11.10      |     |     | H   |     |        |       |        |      |  |
| ATOM       | 376 | HA  | CYS | 29  | 18.380 | 3.531 | 22.600 | 1.00 |  |
| 11.08      |     |     | H   |     |        |       |        |      |  |
| ATOM       | 377 | HB1 | CYS | 29  | 19.794 | 1.053 | 23.546 | 1.00 |  |
| 9.33       |     |     | H   |     |        |       |        |      |  |
| ATOM       | 378 | HB2 | CYS | 29  | 20.306 | 1.793 | 22.030 | 1.00 |  |
| 10.78      |     |     | H   |     |        |       |        |      |  |
| ATOM       | 379 | N   | GLU | 30  | 17.251 | 3.430 | 24.806 | 1.00 |  |
| 13.52      |     |     | N   |     |        |       |        |      |  |
| ATOM       | 380 | CA  | GLU | 30  | 16.570 | 3.365 | 26.098 | 1.00 |  |
| 17.41      |     |     | C   |     |        |       |        |      |  |
| ATOM       | 381 | C   | GLU | 30  | 15.884 | 2.016 | 26.284 | 1.00 |  |
| 10.81      |     |     | C   |     |        |       |        |      |  |
| ATOM       | 382 | O   | GLU | 30  | 15.537 | 1.343 | 25.315 | 1.00 |  |
| 23.22      |     |     | O   |     |        |       |        |      |  |
| ATOM       | 383 | CB  | GLU | 30  | 15.539 | 4.487 | 26.197 | 1.00 |  |
| 37.83      |     |     | C   |     |        |       |        |      |  |
| ATOM       | 384 | CG  | GLU | 30  | 16.254 | 5.838 | 26.123 |      |  |
| 1.00108.13 |     |     |     | C   |        |       |        |      |  |
| ATOM       | 385 | CD  | GLU | 30  | 17.088 | 6.055 | 27.382 |      |  |
| 1.00240.52 |     |     |     | C   |        |       |        |      |  |
| ATOM       | 386 | OE1 | GLU | 30  | 16.846 | 5.363 | 28.356 |      |  |
| 1.00422.56 |     |     |     | O   |        |       |        |      |  |
| ATOM       | 387 | OE2 | GLU | 30  | 17.959 | 6.910 | 27.349 |      |  |
| 1.00410.81 |     |     |     | O1- |        |       |        |      |  |
| ATOM       | 388 | HN  | GLU | 30  | 16.791 | 3.834 | 24.040 | 1.00 |  |
| 15.61      |     |     | H   |     |        |       |        |      |  |
| ATOM       | 389 | HA  | GLU | 30  | 17.298 | 3.495 | 26.885 | 1.00 |  |
| 24.60      |     |     | H   |     |        |       |        |      |  |
| ATOM       | 390 | HB1 | GLU | 30  | 15.013 | 4.411 | 27.134 | 1.00 |  |
| 72.67      |     |     | H   |     |        |       |        |      |  |
| ATOM       | 391 | HB2 | GLU | 30  | 14.838 | 4.407 | 25.379 | 1.00 |  |
| 56.47      |     |     | H   |     |        |       |        |      |  |
| ATOM       | 392 | HG1 | GLU | 30  | 15.521 | 6.626 | 26.040 |      |  |
| 1.00196.66 |     |     |     | H   |        |       |        |      |  |
| ATOM       | 393 | HG2 | GLU | 30  | 16.899 | 5.853 | 25.257 |      |  |
| 1.00140.67 |     |     |     | H   |        |       |        |      |  |
| ATOM       | 394 | N   | LYS | 31  | 15.691 | 1.630 | 27.545 | 1.00 |  |



|            |     |     |     |     |        |        |        |      |  |
|------------|-----|-----|-----|-----|--------|--------|--------|------|--|
| 11.96      |     |     | N   |     |        |        |        |      |  |
| ATOM       | 395 | CA  | LYS | 31  | 15.039 | 0.359  | 27.873 | 1.00 |  |
| 11.40      |     |     | C   |     |        |        |        |      |  |
| ATOM       | 396 | C   | LYS | 31  | 13.809 | 0.615  | 28.737 | 1.00 |  |
| 10.99      |     |     | C   |     |        |        |        |      |  |
| ATOM       | 397 | O   | LYS | 31  | 13.804 | 1.520  | 29.570 | 1.00 |  |
| 12.86      |     |     | O   |     |        |        |        |      |  |
| ATOM       | 398 | CB  | LYS | 31  | 16.014 | -0.544 | 28.631 | 1.00 |  |
| 21.40      |     |     | C   |     |        |        |        |      |  |
| ATOM       | 399 | CG  | LYS | 31  | 17.205 | -0.879 | 27.730 | 1.00 |  |
| 57.81      |     |     | C   |     |        |        |        |      |  |
| ATOM       | 400 | CD  | LYS | 31  | 18.181 | -1.782 | 28.486 |      |  |
| 1.00115.52 |     |     |     | C   |        |        |        |      |  |
| ATOM       | 401 | CE  | LYS | 31  | 19.373 | -2.111 | 27.586 |      |  |
| 1.00250.23 |     |     |     | C   |        |        |        |      |  |
| ATOM       | 402 | NZ  | LYS | 31  | 20.328 | -2.985 | 28.325 |      |  |
| 1.00462.10 |     |     |     | N1+ |        |        |        |      |  |
| ATOM       | 403 | HN  | LYS | 31  | 15.990 | 2.213  | 28.272 | 1.00 |  |
| 26.13      |     |     | H   |     |        |        |        |      |  |
| ATOM       | 404 | HA  | LYS | 31  | 14.732 | -0.142 | 26.966 | 1.00 |  |
| 13.87      |     |     | H   |     |        |        |        |      |  |
| ATOM       | 405 | HB1 | LYS | 31  | 15.513 | -1.457 | 28.915 | 1.00 |  |
| 37.63      |     |     | H   |     |        |        |        |      |  |
| ATOM       | 406 | HB2 | LYS | 31  | 16.362 | -0.034 | 29.517 | 1.00 |  |
| 47.19      |     |     | H   |     |        |        |        |      |  |
| ATOM       | 407 | HG1 | LYS | 31  | 17.708 | 0.033  | 27.446 |      |  |
| 1.00126.32 |     |     |     | H   |        |        |        |      |  |
| ATOM       | 408 | HG2 | LYS | 31  | 16.853 | -1.387 | 26.844 |      |  |
| 1.00114.19 |     |     |     | H   |        |        |        |      |  |
| ATOM       | 409 | HD1 | LYS | 31  | 17.681 | -2.697 | 28.766 |      |  |
| 1.00198.45 |     |     |     | H   |        |        |        |      |  |
| ATOM       | 410 | HD2 | LYS | 31  | 18.528 | -1.274 | 29.375 |      |  |
| 1.00200.14 |     |     |     | H   |        |        |        |      |  |
| ATOM       | 411 | HE1 | LYS | 31  | 19.870 | -1.196 | 27.299 |      |  |
| 1.00374.64 |     |     |     | H   |        |        |        |      |  |
| ATOM       | 412 | HE2 | LYS | 31  | 19.025 | -2.625 | 26.702 |      |  |
| 1.00403.27 |     |     |     | H   |        |        |        |      |  |
| ATOM       | 413 | HZ1 | LYS | 31  | 20.029 | -3.062 | 29.318 |      |  |
| 1.00627.38 |     |     |     | H   |        |        |        |      |  |
| ATOM       | 414 | HZ2 | LYS | 31  | 21.281 | -2.572 | 28.281 |      |  |
| 1.00622.26 |     |     |     | H   |        |        |        |      |  |
| ATOM       | 415 | HZ3 | LYS | 31  | 20.338 | -3.931 | 27.895 |      |  |
| 1.00619.20 |     |     |     | H   |        |        |        |      |  |
| ATOM       | 416 | N   | THR | 32  | 12.762 | -0.181 | 28.526 | 1.00 |  |
| 15.51      |     |     | N   |     |        |        |        |      |  |
| ATOM       | 417 | CA  | THR | 32  | 11.525 | -0.020 | 29.287 | 1.00 |  |
| 22.44      |     |     | C   |     |        |        |        |      |  |
| ATOM       | 418 | C   | THR | 32  | 11.568 | -0.845 | 30.569 | 1.00 |  |
| 26.60      |     |     | C   |     |        |        |        |      |  |
| ATOM       | 419 | O   | THR | 32  | 11.685 | -2.070 | 30.530 | 1.00 |  |
| 57.43      |     |     | O   |     |        |        |        |      |  |
| ATOM       | 420 | CB  | THR | 32  | 10.329 | -0.462 | 28.437 | 1.00 |  |

|            |     |      |     |    |        |        |        |      |  |
|------------|-----|------|-----|----|--------|--------|--------|------|--|
| 56.28      |     |      | C   |    |        |        |        |      |  |
| ATOM       | 421 | CG2  | THR | 32 | 9.040  | -0.295 | 29.243 |      |  |
| 1.00102.70 |     |      |     |    |        |        |        | C    |  |
| ATOM       | 422 | OG1  | THR | 32 | 10.261 | 0.336  | 27.265 |      |  |
| 1.00111.17 |     |      |     |    |        |        |        | O    |  |
| ATOM       | 423 | HN   | THR | 32 | 12.822 | -0.881 | 27.844 | 1.00 |  |
| 18.79      |     |      | H   |    |        |        |        |      |  |
| ATOM       | 424 | HA   | THR | 32 | 11.398 | 1.021  | 29.547 | 1.00 |  |
| 19.67      |     |      | H   |    |        |        |        |      |  |
| ATOM       | 425 | HB   | THR | 32 | 10.444 | -1.498 | 28.162 | 1.00 |  |
| 84.25      |     |      | H   |    |        |        |        |      |  |
| ATOM       | 426 | HG1  | THR | 32 | 9.760  | 1.128  | 27.474 |      |  |
| 1.00205.03 |     |      |     |    |        |        |        | H    |  |
| ATOM       | 427 | HG21 | THR | 32 | 8.190  | -0.431 | 28.590 |      |  |
| 1.00220.71 |     |      |     |    |        |        |        | H    |  |
| ATOM       | 428 | HG22 | THR | 32 | 9.010  | 0.695  | 29.672 |      |  |
| 1.00174.67 |     |      |     |    |        |        |        | H    |  |
| ATOM       | 429 | HG23 | THR | 32 | 9.011  | -1.033 | 30.031 |      |  |
| 1.00217.44 |     |      |     |    |        |        |        | H    |  |
| ATOM       | 430 | N    | THR | 33 | 11.464 | -0.161 | 31.704 | 1.00 |  |
| 22.47      |     |      | N   |    |        |        |        |      |  |
| ATOM       | 431 | CA   | THR | 33 | 11.482 | -0.827 | 33.003 | 1.00 |  |
| 41.60      |     |      | C   |    |        |        |        |      |  |
| ATOM       | 432 | C    | THR | 33 | 10.729 | -0.019 | 34.021 | 1.00 |  |
| 38.03      |     |      | C   |    |        |        |        |      |  |
| ATOM       | 433 | O    | THR | 33 | 11.310 | 0.726  | 34.810 | 1.00 |  |
| 52.73      |     |      | O   |    |        |        |        |      |  |
| ATOM       | 434 | CB   | THR | 33 | 12.912 | -1.055 | 33.483 | 1.00 |  |
| 63.25      |     |      | C   |    |        |        |        |      |  |
| ATOM       | 435 | CG2  | THR | 33 | 13.595 | -2.103 | 32.605 |      |  |
| 1.00121.65 |     |      |     |    |        |        |        | C    |  |
| ATOM       | 436 | OG1  | THR | 33 | 13.632 | 0.168  | 33.418 | 1.00 |  |
| 96.20      |     |      | O   |    |        |        |        |      |  |
| ATOM       | 437 | HN   | THR | 33 | 11.367 | 0.815  | 31.669 | 1.00 |  |
| 23.82      |     |      | H   |    |        |        |        |      |  |
| ATOM       | 438 | HA   | THR | 33 | 10.982 | -1.776 | 32.926 | 1.00 |  |
| 67.12      |     |      | H   |    |        |        |        |      |  |
| ATOM       | 439 | HB   | THR | 33 | 12.887 | -1.407 | 34.501 |      |  |
| 1.00107.59 |     |      |     |    |        |        |        | H    |  |
| ATOM       | 440 | HG1  | THR | 33 | 13.072 | 0.820  | 32.993 |      |  |
| 1.00176.27 |     |      |     |    |        |        |        | H    |  |
| ATOM       | 441 | HG21 | THR | 33 | 14.522 | -2.410 | 33.066 |      |  |
| 1.00255.23 |     |      |     |    |        |        |        | H    |  |
| ATOM       | 442 | HG22 | THR | 33 | 13.800 | -1.680 | 31.632 |      |  |
| 1.00245.37 |     |      |     |    |        |        |        | H    |  |
| ATOM       | 443 | HG23 | THR | 33 | 12.947 | -2.960 | 32.495 |      |  |
| 1.00185.78 |     |      |     |    |        |        |        | H    |  |
| ATOM       | 444 | N    | GLY | 34 | 9.424  | -0.197 | 34.003 | 1.00 |  |
| 40.93      |     |      | N   |    |        |        |        |      |  |
| ATOM       | 445 | CA   | GLY | 34 | 8.567  | 0.494  | 34.935 | 1.00 |  |
| 45.59      |     |      | C   |    |        |        |        |      |  |
| ATOM       | 446 | C    | GLY | 34 | 8.339  | 1.935  | 34.499 | 1.00 |  |

|            |     |      |     |    |        |        |        |      |  |
|------------|-----|------|-----|----|--------|--------|--------|------|--|
| 40.97      |     |      | C   |    |        |        |        |      |  |
| ATOM       | 447 | O    | GLY | 34 | 7.564  | 2.668  | 35.115 | 1.00 |  |
| 82.17      |     |      | O   |    |        |        |        |      |  |
| ATOM       | 448 | HN   | GLY | 34 | 9.037  | -0.820 | 33.358 | 1.00 |  |
| 54.00      |     |      | H   |    |        |        |        |      |  |
| ATOM       | 449 | HA1  | GLY | 34 | 9.045  | 0.479  | 35.895 | 1.00 |  |
| 54.41      |     |      | H   |    |        |        |        |      |  |
| ATOM       | 450 | HA2  | GLY | 34 | 7.619  | -0.021 | 34.995 | 1.00 |  |
| 62.09      |     |      | H   |    |        |        |        |      |  |
| ATOM       | 451 | N    | ASN | 35 | 9.017  | 2.333  | 33.425 | 1.00 |  |
| 32.51      |     |      | N   |    |        |        |        |      |  |
| ATOM       | 452 | CA   | ASN | 35 | 8.885  | 3.686  | 32.898 | 1.00 |  |
| 33.20      |     |      | C   |    |        |        |        |      |  |
| ATOM       | 453 | C    | ASN | 35 | 9.324  | 3.733  | 31.437 | 1.00 |  |
| 23.17      |     |      | C   |    |        |        |        |      |  |
| ATOM       | 454 | O    | ASN | 35 | 10.200 | 2.976  | 31.020 | 1.00 |  |
| 27.01      |     |      | O   |    |        |        |        |      |  |
| ATOM       | 455 | CB   | ASN | 35 | 9.736  | 4.658  | 33.716 | 1.00 |  |
| 54.51      |     |      | C   |    |        |        |        |      |  |
| ATOM       | 456 | CG   | ASN | 35 | 9.341  | 4.598  | 35.180 | 1.00 |  |
| 80.73      |     |      | C   |    |        |        |        |      |  |
| ATOM       | 457 | ND2  | ASN | 35 | 8.152  | 4.973  | 35.538 |      |  |
| 1.00220.46 |     |      |     | N  |        |        |        |      |  |
| ATOM       | 458 | OD1  | ASN | 35 | 10.145 | 4.203  | 36.025 |      |  |
| 1.00117.80 |     |      |     | O  |        |        |        |      |  |
| ATOM       | 459 | HN   | ASN | 35 | 9.614  | 1.699  | 32.975 | 1.00 |  |
| 51.15      |     |      | H   |    |        |        |        |      |  |
| ATOM       | 460 | HA   | ASN | 35 | 7.850  | 3.990  | 32.962 | 1.00 |  |
| 47.21      |     |      | H   |    |        |        |        |      |  |
| ATOM       | 461 | HB1  | ASN | 35 | 9.588  | 5.662  | 33.347 | 1.00 |  |
| 68.31      |     |      | H   |    |        |        |        |      |  |
| ATOM       | 462 | HB2  | ASN | 35 | 10.771 | 4.392  | 33.624 | 1.00 |  |
| 57.75      |     |      | H   |    |        |        |        |      |  |
| ATOM       | 463 | HD21 | ASN | 35 | 7.515  | 5.294  | 34.865 |      |  |
| 1.00405.39 |     |      |     | H  |        |        |        |      |  |
| ATOM       | 464 | HD22 | ASN | 35 | 7.897  | 4.938  | 36.474 |      |  |
| 1.00245.64 |     |      |     | H  |        |        |        |      |  |
| ATOM       | 465 | N    | PHE | 36 | 8.706  | 4.622  | 30.663 | 1.00 |  |
| 35.72      |     |      | N   |    |        |        |        |      |  |
| ATOM       | 466 | CA   | PHE | 36 | 9.024  | 4.766  | 29.251 | 1.00 |  |
| 33.41      |     |      | C   |    |        |        |        |      |  |
| ATOM       | 467 | C    | PHE | 36 | 9.884  | 6.006  | 29.017 | 1.00 |  |
| 28.51      |     |      | C   |    |        |        |        |      |  |
| ATOM       | 468 | O    | PHE | 36 | 9.661  | 7.051  | 29.628 | 1.00 |  |
| 45.23      |     |      | O   |    |        |        |        |      |  |
| ATOM       | 469 | CB   | PHE | 36 | 7.722  | 4.892  | 28.472 | 1.00 |  |
| 67.53      |     |      | C   |    |        |        |        |      |  |
| ATOM       | 470 | CG   | PHE | 36 | 6.925  | 3.619  | 28.624 | 1.00 |  |
| 86.71      |     |      | C   |    |        |        |        |      |  |
| ATOM       | 471 | CD1  | PHE | 36 | 5.974  | 3.510  | 29.646 |      |  |
| 1.00106.51 |     |      |     | C  |        |        |        |      |  |
| ATOM       | 472 | CD2  | PHE | 36 | 7.136  | 2.548  | 27.746 | 1.00 |  |

|            |     |      |     |    |        |       |        |      |  |
|------------|-----|------|-----|----|--------|-------|--------|------|--|
| 99.48      |     |      | C   |    |        |       |        |      |  |
| ATOM       | 473 | CE1  | PHE | 36 | 5.233  | 2.331 | 29.790 |      |  |
| 1.00134.48 |     |      | C   |    |        |       |        |      |  |
| ATOM       | 474 | CE2  | PHE | 36 | 6.394  | 1.370 | 27.890 |      |  |
| 1.00134.27 |     |      | C   |    |        |       |        |      |  |
| ATOM       | 475 | CZ   | PHE | 36 | 5.444  | 1.261 | 28.911 |      |  |
| 1.00149.48 |     |      | C   |    |        |       |        |      |  |
| ATOM       | 476 | HN   | PHE | 36 | 8.013  | 5.193 | 31.044 | 1.00 |  |
| 62.87      |     |      | H   |    |        |       |        |      |  |
| ATOM       | 477 | HA   | PHE | 36 | 9.558  | 3.893 | 28.902 | 1.00 |  |
| 28.53      |     |      | H   |    |        |       |        |      |  |
| ATOM       | 478 | HB1  | PHE | 36 | 7.942  | 5.059 | 27.439 | 1.00 |  |
| 73.56      |     |      | H   |    |        |       |        |      |  |
| ATOM       | 479 | HB2  | PHE | 36 | 7.151  | 5.724 | 28.859 | 1.00 |  |
| 88.42      |     |      | H   |    |        |       |        |      |  |
| ATOM       | 480 | HD1  | PHE | 36 | 5.814  | 4.336 | 30.324 |      |  |
| 1.00110.20 |     |      | H   |    |        |       |        |      |  |
| ATOM       | 481 | HD2  | PHE | 36 | 7.871  | 2.630 | 26.958 | 1.00 |  |
| 93.07      |     |      | H   |    |        |       |        |      |  |
| ATOM       | 482 | HE1  | PHE | 36 | 4.501  | 2.249 | 30.579 |      |  |
| 1.00155.06 |     |      | H   |    |        |       |        |      |  |
| ATOM       | 483 | HE2  | PHE | 36 | 6.554  | 0.544 | 27.213 |      |  |
| 1.00159.46 |     |      | H   |    |        |       |        |      |  |
| ATOM       | 484 | HZ   | PHE | 36 | 4.871  | 0.352 | 29.023 |      |  |
| 1.00183.25 |     |      | H   |    |        |       |        |      |  |
| ATOM       | 485 | N    | THR | 37 | 10.865 | 5.883 | 28.128 | 1.00 |  |
| 20.06      |     |      | N   |    |        |       |        |      |  |
| ATOM       | 486 | CA   | THR | 37 | 11.751 | 6.998 | 27.818 | 1.00 |  |
| 27.18      |     |      | C   |    |        |       |        |      |  |
| ATOM       | 487 | C    | THR | 37 | 12.427 | 6.782 | 26.467 | 1.00 |  |
| 41.87      |     |      | C   |    |        |       |        |      |  |
| ATOM       | 488 | O    | THR | 37 | 13.073 | 5.760 | 26.238 |      |  |
| 1.00169.86 |     |      | O   |    |        |       |        |      |  |
| ATOM       | 489 | CB   | THR | 37 | 12.814 | 7.142 | 28.914 | 1.00 |  |
| 26.52      |     |      | C   |    |        |       |        |      |  |
| ATOM       | 490 | CG2  | THR | 37 | 13.237 | 5.758 | 29.414 | 1.00 |  |
| 75.69      |     |      | C   |    |        |       |        |      |  |
| ATOM       | 491 | OG1  | THR | 37 | 13.943 | 7.827 | 28.389 | 1.00 |  |
| 81.95      |     |      | O   |    |        |       |        |      |  |
| ATOM       | 492 | HN   | THR | 37 | 10.995 | 5.029 | 27.668 | 1.00 |  |
| 18.47      |     |      | H   |    |        |       |        |      |  |
| ATOM       | 493 | HA   | THR | 37 | 11.168 | 7.907 | 27.775 | 1.00 |  |
| 38.80      |     |      | H   |    |        |       |        |      |  |
| ATOM       | 494 | HB   | THR | 37 | 12.405 | 7.706 | 29.740 | 1.00 |  |
| 81.60      |     |      | H   |    |        |       |        |      |  |
| ATOM       | 495 | HG1  | THR | 37 | 14.342 | 7.269 | 27.717 |      |  |
| 1.00188.80 |     |      | H   |    |        |       |        |      |  |
| ATOM       | 496 | HG21 | THR | 37 | 14.198 | 5.829 | 29.901 |      |  |
| 1.00196.98 |     |      | H   |    |        |       |        |      |  |
| ATOM       | 497 | HG22 | THR | 37 | 13.307 | 5.076 | 28.581 |      |  |
| 1.00196.23 |     |      | H   |    |        |       |        |      |  |
| ATOM       | 498 | HG23 | THR | 37 | 12.505 | 5.390 | 30.118 |      |  |

|            |     |     |     |     |        |        |        |      |  |
|------------|-----|-----|-----|-----|--------|--------|--------|------|--|
| 1.00168.92 |     |     |     | H   |        |        |        |      |  |
| ATOM       | 499 | N   | GLU | 38  | 12.265 | 7.754  | 25.578 | 1.00 |  |
| 26.53      |     |     | N   |     |        |        |        |      |  |
| ATOM       | 500 | CA  | GLU | 38  | 12.852 | 7.677  | 24.241 | 1.00 |  |
| 30.29      |     |     | C   |     |        |        |        |      |  |
| ATOM       | 501 | C   | GLU | 38  | 14.314 | 8.112  | 24.259 | 1.00 |  |
| 25.39      |     |     | C   |     |        |        |        |      |  |
| ATOM       | 502 | O   | GLU | 38  | 14.786 | 8.709  | 25.227 | 1.00 |  |
| 51.60      |     |     | O   |     |        |        |        |      |  |
| ATOM       | 503 | CB  | GLU | 38  | 12.067 | 8.570  | 23.277 | 1.00 |  |
| 54.82      |     |     | C   |     |        |        |        |      |  |
| ATOM       | 504 | CG  | GLU | 38  | 10.624 | 8.061  | 23.146 |      |  |
| 1.00165.84 |     |     |     | C   |        |        |        |      |  |
| ATOM       | 505 | CD  | GLU | 38  | 9.788  | 8.523  | 24.337 |      |  |
| 1.00292.92 |     |     |     | C   |        |        |        |      |  |
| ATOM       | 506 | OE1 | GLU | 38  | 10.324 | 9.226  | 25.179 |      |  |
| 1.00414.19 |     |     |     | O   |        |        |        |      |  |
| ATOM       | 507 | OE2 | GLU | 38  | 8.623  | 8.166  | 24.391 |      |  |
| 1.00537.65 |     |     |     | O1- |        |        |        |      |  |
| ATOM       | 508 | HN  | GLU | 38  | 11.734 | 8.539  | 25.823 | 1.00 |  |
| 84.50      |     |     | H   |     |        |        |        |      |  |
| ATOM       | 509 | HA  | GLU | 38  | 12.797 | 6.656  | 23.893 | 1.00 |  |
| 32.15      |     |     | H   |     |        |        |        |      |  |
| ATOM       | 510 | HB1 | GLU | 38  | 12.539 | 8.549  | 22.307 |      |  |
| 1.00144.82 |     |     |     | H   |        |        |        |      |  |
| ATOM       | 511 | HB2 | GLU | 38  | 12.062 | 9.585  | 23.650 |      |  |
| 1.00106.49 |     |     |     | H   |        |        |        |      |  |
| ATOM       | 512 | HG1 | GLU | 38  | 10.623 | 6.980  | 23.108 |      |  |
| 1.00303.31 |     |     |     | H   |        |        |        |      |  |
| ATOM       | 513 | HG2 | GLU | 38  | 10.192 | 8.450  | 22.237 |      |  |
| 1.00323.99 |     |     |     | H   |        |        |        |      |  |
| ATOM       | 514 | N   | CYS | 39  | 15.023 | 7.813  | 23.174 | 1.00 |  |
| 15.84      |     |     | N   |     |        |        |        |      |  |
| ATOM       | 515 | CA  | CYS | 39  | 16.433 | 8.176  | 23.056 | 1.00 |  |
| 14.30      |     |     | C   |     |        |        |        |      |  |
| ATOM       | 516 | C   | CYS | 39  | 16.588 | 9.700  | 23.093 | 1.00 |  |
| 22.31      |     |     | C   |     |        |        |        |      |  |
| ATOM       | 517 | O   | CYS | 39  | 15.683 | 10.422 | 22.678 | 1.00 |  |
| 32.92      |     |     | O   |     |        |        |        |      |  |
| ATOM       | 518 | CB  | CYS | 39  | 16.989 | 7.629  | 21.738 | 1.00 |  |
| 18.08      |     |     | C   |     |        |        |        |      |  |
| ATOM       | 519 | SG  | CYS | 39  | 15.889 | 8.096  | 20.379 | 1.00 |  |
| 17.41      |     |     | S   |     |        |        |        |      |  |
| ATOM       | 520 | HN  | CYS | 39  | 14.588 | 7.343  | 22.434 | 1.00 |  |
| 24.87      |     |     | H   |     |        |        |        |      |  |
| ATOM       | 521 | HA  | CYS | 39  | 16.975 | 7.732  | 23.876 | 1.00 |  |
| 14.60      |     |     | H   |     |        |        |        |      |  |
| ATOM       | 522 | HB1 | CYS | 39  | 17.057 | 6.554  | 21.794 | 1.00 |  |
| 27.71      |     |     | H   |     |        |        |        |      |  |
| ATOM       | 523 | HB2 | CYS | 39  | 17.970 | 8.042  | 21.561 | 1.00 |  |
| 34.91      |     |     | H   |     |        |        |        |      |  |
| ATOM       | 524 | N   | PRO | 40  | 17.700 | 10.211 | 23.577 | 1.00 |  |

|            |     |     |     |    |        |        |        |      |   |
|------------|-----|-----|-----|----|--------|--------|--------|------|---|
| 27.27      |     |     |     |    |        |        |        |      |   |
| ATOM       | 525 | CA  | PRO | 40 | 17.928 | 11.682 | 23.651 | 1.00 |   |
| 47.66      |     |     | C   |    |        |        |        |      |   |
| ATOM       | 526 | C   | PRO | 40 | 18.265 | 12.277 | 22.286 | 1.00 |   |
| 71.54      |     |     | C   |    |        |        |        |      |   |
| ATOM       | 527 | O   | PRO | 40 | 18.992 | 11.677 | 21.495 | 1.00 |   |
| 87.70      |     |     | O   |    |        |        |        |      |   |
| ATOM       | 528 | CB  | PRO | 40 | 19.108 | 11.807 | 24.622 | 1.00 |   |
| 53.85      |     |     | C   |    |        |        |        |      |   |
| ATOM       | 529 | CG  | PRO | 40 | 19.890 | 10.551 | 24.417 | 1.00 |   |
| 46.04      |     |     | C   |    |        |        |        |      |   |
| ATOM       | 530 | CD  | PRO | 40 | 18.859 | 9.461  | 24.098 | 1.00 |   |
| 25.70      |     |     | C   |    |        |        |        |      |   |
| ATOM       | 531 | HA  | PRO | 40 | 17.065 | 12.173 | 24.069 | 1.00 |   |
| 58.04      |     |     | H   |    |        |        |        |      |   |
| ATOM       | 532 | HB1 | PRO | 40 | 18.755 | 11.860 | 25.640 | 1.00 |   |
| 67.93      |     |     | H   |    |        |        |        |      |   |
| ATOM       | 533 | HB2 | PRO | 40 | 19.709 | 12.677 | 24.386 | 1.00 |   |
| 70.99      |     |     | H   |    |        |        |        |      |   |
| ATOM       | 534 | HG1 | PRO | 40 | 20.433 | 10.294 | 25.315 | 1.00 |   |
| 65.91      |     |     | H   |    |        |        |        |      |   |
| ATOM       | 535 | HG2 | PRO | 40 | 20.578 | 10.675 | 23.588 | 1.00 |   |
| 54.99      |     |     | H   |    |        |        |        |      |   |
| ATOM       | 536 | HD1 | PRO | 40 | 18.586 | 8.925  | 24.993 | 1.00 |   |
| 24.22      |     |     | H   |    |        |        |        |      |   |
| ATOM       | 537 | HD2 | PRO | 40 | 19.244 | 8.788  | 23.350 | 1.00 |   |
| 26.94      |     |     | H   |    |        |        |        |      |   |
| ATOM       | 538 | N   | GLY | 41 | 17.733 | 13.462 | 22.024 |      |   |
| 1.00105.24 |     |     |     |    |        |        |        |      | N |
| ATOM       | 539 | CA  | GLY | 41 | 17.982 | 14.141 | 20.758 |      |   |
| 1.00147.55 |     |     |     |    |        |        |        |      | C |
| ATOM       | 540 | C   | GLY | 41 | 19.462 | 14.462 | 20.596 |      |   |
| 1.00161.74 |     |     |     |    |        |        |        |      | C |
| ATOM       | 541 | O   | GLY | 41 | 20.024 | 14.326 | 19.509 |      |   |
| 1.00244.37 |     |     |     |    |        |        |        |      | O |
| ATOM       | 542 | HN  | GLY | 41 | 17.168 | 13.889 | 22.697 |      |   |
| 1.00121.79 |     |     |     |    |        |        |        |      | H |
| ATOM       | 543 | HA1 | GLY | 41 | 17.416 | 15.060 | 20.730 |      |   |
| 1.00184.40 |     |     |     |    |        |        |        |      | H |
| ATOM       | 544 | HA2 | GLY | 41 | 17.667 | 13.504 | 19.947 |      |   |
| 1.00157.34 |     |     |     |    |        |        |        |      | H |
| ATOM       | 545 | N   | LEU | 42 | 20.087 | 14.890 | 21.690 |      |   |
| 1.00162.48 |     |     |     |    |        |        |        |      | N |
| ATOM       | 546 | CA  | LEU | 42 | 21.511 | 15.237 | 21.684 |      |   |
| 1.00191.48 |     |     |     |    |        |        |        |      | C |
| ATOM       | 547 | C   | LEU | 42 | 22.294 | 14.266 | 22.563 |      |   |
| 1.00166.66 |     |     |     |    |        |        |        |      | C |
| ATOM       | 548 | O   | LEU | 42 | 21.808 | 13.828 | 23.606 |      |   |
| 1.00251.38 |     |     |     |    |        |        |        |      | O |
| ATOM       | 549 | CB  | LEU | 42 | 21.702 | 16.662 | 22.212 |      |   |
| 1.00307.99 |     |     |     |    |        |        |        |      | C |
| ATOM       | 550 | CG  | LEU | 42 | 20.867 | 17.645 | 21.382 |      |   |

|            |     |      |     |    |        |        |        |  |
|------------|-----|------|-----|----|--------|--------|--------|--|
| 1.00452.28 |     |      |     | C  |        |        |        |  |
| ATOM       | 551 | CD1  | LEU | 42 | 21.026 | 19.053 | 21.964 |  |
| 1.00681.24 |     |      |     | C  |        |        |        |  |
| ATOM       | 552 | CD2  | LEU | 42 | 21.341 | 17.635 | 19.918 |  |
| 1.00527.46 |     |      |     | C  |        |        |        |  |
| ATOM       | 553 | HN   | LEU | 42 | 19.579 | 14.975 | 22.522 |  |
| 1.00195.47 |     |      |     | H  |        |        |        |  |
| ATOM       | 554 | HA   | LEU | 42 | 21.899 | 15.182 | 20.677 |  |
| 1.00229.77 |     |      |     | H  |        |        |        |  |
| ATOM       | 555 | HB1  | LEU | 42 | 22.744 | 16.932 | 22.143 |  |
| 1.00342.49 |     |      |     | H  |        |        |        |  |
| ATOM       | 556 | HB2  | LEU | 42 | 21.387 | 16.707 | 23.244 |  |
| 1.00335.33 |     |      |     | H  |        |        |        |  |
| ATOM       | 557 | HG   | LEU | 42 | 19.827 | 17.355 | 21.426 |  |
| 1.00427.79 |     |      |     | H  |        |        |        |  |
| ATOM       | 558 | HD11 | LEU | 42 | 22.073 | 19.316 | 21.991 |  |
| 1.00909.71 |     |      |     | H  |        |        |        |  |
| ATOM       | 559 | HD12 | LEU | 42 | 20.624 | 19.076 | 22.965 |  |
| 1.00706.80 |     |      |     | H  |        |        |        |  |
| ATOM       | 560 | HD13 | LEU | 42 | 20.493 | 19.761 | 21.346 |  |
| 1.00858.82 |     |      |     | H  |        |        |        |  |
| ATOM       | 561 | HD21 | LEU | 42 | 20.873 | 16.813 | 19.395 |  |
| 1.00631.69 |     |      |     | H  |        |        |        |  |
| ATOM       | 562 | HD22 | LEU | 42 | 22.415 | 17.521 | 19.882 |  |
| 1.00628.06 |     |      |     | H  |        |        |        |  |
| ATOM       | 563 | HD23 | LEU | 42 | 21.063 | 18.564 | 19.439 |  |
| 1.00656.75 |     |      |     | H  |        |        |        |  |
| ATOM       | 564 | N    | THR | 43 | 23.507 | 13.933 | 22.136 |  |
| 1.00178.52 |     |      |     | N  |        |        |        |  |
| ATOM       | 565 | CA   | THR | 43 | 24.346 | 13.012 | 22.890 |  |
| 1.00240.84 |     |      |     | C  |        |        |        |  |
| ATOM       | 566 | C    | THR | 43 | 24.836 | 13.674 | 24.184 |  |
| 1.00372.31 |     |      |     | C  |        |        |        |  |
| ATOM       | 567 | O    | THR | 43 | 25.020 | 14.890 | 24.223 |  |
| 1.00500.13 |     |      |     | O  |        |        |        |  |
| ATOM       | 568 | CB   | THR | 43 | 25.549 | 12.603 | 22.032 |  |
| 1.00354.13 |     |      |     | C  |        |        |        |  |
| ATOM       | 569 | CG2  | THR | 43 | 25.054 | 12.017 | 20.709 |  |
| 1.00463.04 |     |      |     | C  |        |        |        |  |
| ATOM       | 570 | OG1  | THR | 43 | 26.352 | 13.746 | 21.774 |  |
| 1.00508.50 |     |      |     | O  |        |        |        |  |
| ATOM       | 571 | HN   | THR | 43 | 23.841 | 14.313 | 21.296 |  |
| 1.00229.59 |     |      |     | H  |        |        |        |  |
| ATOM       | 572 | HA   | THR | 43 | 23.769 | 12.135 | 23.125 |  |
| 1.00249.90 |     |      |     | H  |        |        |        |  |
| ATOM       | 573 | HB   | THR | 43 | 26.134 | 11.864 | 22.550 |  |
| 1.00481.58 |     |      |     | H  |        |        |        |  |
| ATOM       | 574 | HG1  | THR | 43 | 26.899 | 13.905 | 22.547 |  |
| 1.00624.31 |     |      |     | H  |        |        |        |  |
| ATOM       | 575 | HG21 | THR | 43 | 24.293 | 11.277 | 20.904 |  |
| 1.00650.95 |     |      |     | H  |        |        |        |  |
| ATOM       | 576 | HG22 | THR | 43 | 25.881 | 11.554 | 20.190 |  |

|            |     |      |     |   |    |        |        |        |
|------------|-----|------|-----|---|----|--------|--------|--------|
| 1.00580.73 |     |      |     | H |    |        |        |        |
| ATOM       | 577 | HG23 | THR | H | 43 | 24.642 | 12.805 | 20.097 |
| 1.00571.99 |     |      |     | H |    |        |        |        |
| ATOM       | 578 | N    | PRO | H | 44 | 25.057 | 12.914 | 25.237 |
| 1.00488.39 |     |      |     | N |    |        |        |        |
| ATOM       | 579 | CA   | PRO | N | 44 | 25.542 | 13.473 | 26.536 |
| 1.00760.13 |     |      |     | C |    |        |        |        |
| ATOM       | 580 | C    | PRO | C | 44 | 27.018 | 13.866 | 26.473 |
| 1.00735.36 |     |      |     | C |    |        |        |        |
| ATOM       | 581 | O    | PRO | C | 44 | 27.578 | 14.370 | 27.447 |
| 1.00999.99 |     |      |     | O |    |        |        |        |
| ATOM       | 582 | CB   | PRO | O | 44 | 25.311 | 12.323 | 27.526 |
| 1.00999.99 |     |      |     | C |    |        |        |        |
| ATOM       | 583 | CG   | PRO | C | 44 | 25.430 | 11.087 | 26.696 |
| 1.00856.94 |     |      |     | C |    |        |        |        |
| ATOM       | 584 | CD   | PRO | C | 44 | 24.869 | 11.451 | 25.320 |
| 1.00548.09 |     |      |     | C |    |        |        |        |
| ATOM       | 585 | HA   | PRO | C | 44 | 24.944 | 14.322 | 26.825 |
| 1.00939.00 |     |      |     | H |    |        |        |        |
| ATOM       | 586 | HB1  | PRO | H | 44 | 24.320 | 12.387 | 27.951 |
| 1.00999.99 |     |      |     | H |    |        |        |        |
| ATOM       | 587 | HB2  | PRO | H | 44 | 26.060 | 12.335 | 28.308 |
| 1.00999.99 |     |      |     | H |    |        |        |        |
| ATOM       | 588 | HG1  | PRO | H | 44 | 24.851 | 10.285 | 27.129 |
| 1.00999.99 |     |      |     | H |    |        |        |        |
| ATOM       | 589 | HG2  | PRO | H | 44 | 26.470 | 10.796 | 26.614 |
| 1.00853.53 |     |      |     | H |    |        |        |        |
| ATOM       | 590 | HD1  | PRO | H | 44 | 23.819 | 11.207 | 25.261 |
| 1.00602.45 |     |      |     | H |    |        |        |        |
| ATOM       | 591 | HD2  | PRO | H | 44 | 25.422 | 10.944 | 24.543 |
| 1.00463.32 |     |      |     | H |    |        |        |        |
| ATOM       | 592 | N    | ILE | H | 45 | 27.641 | 13.625 | 25.324 |
| 1.00518.33 |     |      |     | N |    |        |        |        |
| ATOM       | 593 | CA   | ILE | N | 45 | 29.051 | 13.951 | 25.148 |
| 1.00582.79 |     |      |     | C |    |        |        |        |
| ATOM       | 594 | C    | ILE | C | 45 | 29.316 | 15.411 | 25.502 |
| 1.00795.93 |     |      |     | C |    |        |        |        |
| ATOM       | 595 | O    | ILE | C | 45 | 28.612 | 16.309 | 25.041 |
| 1.00898.75 |     |      |     | O |    |        |        |        |
| ATOM       | 596 | CB   | ILE | O | 45 | 29.468 | 13.698 | 23.700 |
| 1.00474.41 |     |      |     | C |    |        |        |        |
| ATOM       | 597 | CG1  | ILE | C | 45 | 29.304 | 12.212 | 23.373 |
| 1.00516.90 |     |      |     | C |    |        |        |        |
| ATOM       | 598 | CG2  | ILE | C | 45 | 30.932 | 14.100 | 23.511 |
| 1.00760.75 |     |      |     | C |    |        |        |        |
| ATOM       | 599 | CD1  | ILE | C | 45 | 29.457 | 12.002 | 21.865 |
| 1.00566.81 |     |      |     | C |    |        |        |        |
| ATOM       | 600 | HN   | ILE | C | 45 | 27.145 | 13.218 | 24.583 |
| 1.00395.72 |     |      |     | H |    |        |        |        |
| ATOM       | 601 | HA   | ILE | H | 45 | 29.642 | 13.319 | 25.796 |
| 1.00711.06 |     |      |     | H |    |        |        |        |
| ATOM       | 602 | HB   | ILE | H | 45 | 28.847 | 14.286 | 23.040 |



|            |     |      |     |   |    |        |        |        |
|------------|-----|------|-----|---|----|--------|--------|--------|
| 1.00477.81 |     |      |     | H |    |        |        |        |
| ATOM       | 603 | HG11 | ILE | H | 45 | 28.324 | 11.881 | 23.680 |
| 1.00624.28 |     |      |     | H |    |        |        |        |
| ATOM       | 604 | HG12 | ILE | H | 45 | 30.058 | 11.642 | 23.895 |
| 1.00744.84 |     |      |     | H |    |        |        |        |
| ATOM       | 605 | HG21 | ILE | H | 45 | 31.014 | 15.176 | 23.527 |
| 1.00920.57 |     |      |     | H |    |        |        |        |
| ATOM       | 606 | HG22 | ILE | H | 45 | 31.291 | 13.726 | 22.564 |
| 1.00999.99 |     |      |     | H |    |        |        |        |
| ATOM       | 607 | HG23 | ILE | H | 45 | 31.525 | 13.683 | 24.312 |
| 1.00865.46 |     |      |     | H |    |        |        |        |
| ATOM       | 608 | HD11 | ILE | H | 45 | 30.476 | 12.211 | 21.574 |
| 1.00658.89 |     |      |     | H |    |        |        |        |
| ATOM       | 609 | HD12 | ILE | H | 45 | 28.790 | 12.669 | 21.339 |
| 1.00734.30 |     |      |     | H |    |        |        |        |
| ATOM       | 610 | HD13 | ILE | H | 45 | 29.214 | 10.980 | 21.616 |
| 1.00675.84 |     |      |     | H |    |        |        |        |
| ATOM       | 611 | N    | ALA | N | 46 | 30.338 | 15.639 | 26.321 |
| 1.00999.99 |     |      |     | N |    |        |        |        |
| ATOM       | 612 | CA   | ALA | C | 46 | 30.690 | 16.993 | 26.732 |
| 1.00999.99 |     |      |     | C |    |        |        |        |
| ATOM       | 613 | C    | ALA | C | 46 | 30.974 | 17.865 | 25.512 |
| 1.00999.99 |     |      |     | C |    |        |        |        |
| ATOM       | 614 | CB   | ALA | C | 46 | 31.923 | 16.960 | 27.636 |
| 1.00999.99 |     |      |     | C |    |        |        |        |
| ATOM       | 615 | OT1  | ALA | O | 46 | 30.676 | 19.047 | 25.571 |
| 1.00999.99 |     |      |     | O |    |        |        |        |
| ATOM       | 616 | OT2  | ALA | O | 46 | 31.484 | 17.337 | 24.538 |
| 1.00999.99 |     |      |     | O |    |        |        |        |
| ATOM       | 617 | HN   | ALA | H | 46 | 30.864 | 14.882 | 26.656 |
| 1.00999.99 |     |      |     | H |    |        |        |        |
| ATOM       | 618 | HA   | ALA | H | 46 | 29.865 | 17.418 | 27.283 |
| 1.00999.99 |     |      |     | H |    |        |        |        |
| ATOM       | 619 | HB1  | ALA | H | 46 | 32.759 | 16.550 | 27.090 |
| 1.00999.99 |     |      |     | H |    |        |        |        |
| ATOM       | 620 | HB2  | ALA | H | 46 | 31.720 | 16.343 | 28.499 |
| 1.00999.99 |     |      |     | H |    |        |        |        |
| ATOM       | 621 | HB3  | ALA | H | 46 | 32.160 | 17.963 | 27.958 |
| 1.00999.99 |     |      |     | H |    |        |        |        |
| ENDMDL     |     |      |     |   |    |        |        |        |
| TER        |     |      |     |   |    |        |        |        |
| MODEL      |     | 5    |     |   |    |        |        |        |
| ATOM       | 1   | N    | GLY | N | 1  | 25.247 | -2.355 | 20.648 |
| 1.00999.99 |     |      |     | N |    |        |        |        |
| ATOM       | 2   | CA   | GLY | C | 1  | 24.976 | -2.957 | 19.311 |
| 1.00999.99 |     |      |     | C |    |        |        |        |
| ATOM       | 3   | C    | GLY | C | 1  | 24.380 | -1.901 | 18.387 |
| 1.00999.99 |     |      |     | C |    |        |        |        |
| ATOM       | 4   | O    | GLY | O | 1  | 23.826 | -0.901 | 18.844 |
| 1.00999.99 |     |      |     | O |    |        |        |        |
| ATOM       | 5   | HA1  | GLY | H | 1  | 24.277 | -3.772 | 19.418 |
| 1.00999.99 |     |      |     | H |    |        |        |        |

|            |    |      |     |   |        |        |        |      |
|------------|----|------|-----|---|--------|--------|--------|------|
| ATOM       | 6  | HA2  | GLY | 1 | 25.900 | -3.327 | 18.890 |      |
| 1.00999.99 |    |      |     |   |        |        |        | H    |
| ATOM       | 7  | HT1  | GLY | 1 | 24.579 | -2.743 | 21.343 |      |
| 1.00999.99 |    |      |     |   |        |        |        | H    |
| ATOM       | 8  | HT2  | GLY | 1 | 25.130 | -1.322 | 20.593 |      |
| 1.00999.99 |    |      |     |   |        |        |        | H    |
| ATOM       | 9  | HT3  | GLY | 1 | 26.218 | -2.581 | 20.940 |      |
| 1.00999.99 |    |      |     |   |        |        |        | H    |
| ATOM       | 10 | N    | LEU | 2 | 24.496 | -2.131 | 17.084 |      |
| 1.00999.99 |    |      |     |   |        |        |        | N    |
| ATOM       | 11 | CA   | LEU | 2 | 23.964 | -1.194 | 16.100 |      |
| 1.00895.59 |    |      |     |   |        |        |        | C    |
| ATOM       | 12 | C    | LEU | 2 | 22.440 | -1.230 | 16.107 |      |
| 1.00532.27 |    |      |     |   |        |        |        | C    |
| ATOM       | 13 | O    | LEU | 2 | 21.835 | -2.267 | 16.384 |      |
| 1.00625.21 |    |      |     |   |        |        |        | O    |
| ATOM       | 14 | CB   | LEU | 2 | 24.476 | -1.557 | 14.703 |      |
| 1.00999.99 |    |      |     |   |        |        |        | C    |
| ATOM       | 15 | CG   | LEU | 2 | 26.010 | -1.540 | 14.681 |      |
| 1.00999.99 |    |      |     |   |        |        |        | C    |
| ATOM       | 16 | CD1  | LEU | 2 | 26.496 | -2.003 | 13.304 |      |
| 1.00999.99 |    |      |     |   |        |        |        | C    |
| ATOM       | 17 | CD2  | LEU | 2 | 26.529 | -0.117 | 14.959 |      |
| 1.00999.99 |    |      |     |   |        |        |        | C    |
| ATOM       | 18 | HN   | LEU | 2 | 24.946 | -2.946 | 16.777 |      |
| 1.00999.99 |    |      |     |   |        |        |        | H    |
| ATOM       | 19 | HA   | LEU | 2 | 24.290 | -0.197 | 16.348 |      |
| 1.00890.87 |    |      |     |   |        |        |        | H    |
| ATOM       | 20 | HB1  | LEU | 2 | 24.101 | -0.840 | 13.987 |      |
| 1.00924.07 |    |      |     |   |        |        |        | H    |
| ATOM       | 21 | HB2  | LEU | 2 | 24.124 | -2.544 | 14.440 |      |
| 1.00999.99 |    |      |     |   |        |        |        | H    |
| ATOM       | 22 | HG   | LEU | 2 | 26.385 | -2.215 | 15.438 |      |
| 1.00999.99 |    |      |     |   |        |        |        | H    |
| ATOM       | 23 | HD11 | LEU | 2 | 26.324 | -1.220 | 12.580 |      |
| 1.00999.99 |    |      |     |   |        |        |        | H    |
| ATOM       | 24 | HD12 | LEU | 2 | 25.954 | -2.889 | 13.011 |      |
| 1.00999.99 |    |      |     |   |        |        |        | H    |
| ATOM       | 25 | HD13 | LEU | 2 | 27.553 | -2.224 | 13.351 |      |
| 1.00999.99 |    |      |     |   |        |        |        | H    |
| ATOM       | 26 | HD21 | LEU | 2 | 26.564 | 0.052  | 16.025 |      |
| 1.00999.99 |    |      |     |   |        |        |        | H    |
| ATOM       | 27 | HD22 | LEU | 2 | 25.870 | 0.609  | 14.503 |      |
| 1.00999.99 |    |      |     |   |        |        |        | H    |
| ATOM       | 28 | HD23 | LEU | 2 | 27.523 | -0.004 | 14.550 |      |
| 1.00999.99 |    |      |     |   |        |        |        | H    |
| ATOM       | 29 | N    | CYS | 3 | 21.821 | -0.093 | 15.797 |      |
| 1.00271.28 |    |      |     |   |        |        |        | N    |
| ATOM       | 30 | CA   | CYS | 3 | 20.363 | -0.013 | 15.773 |      |
| 1.00104.50 |    |      |     |   |        |        |        | C    |
| ATOM       | 31 | C    | CYS | 3 | 19.822 | -0.555 | 14.454 | 1.00 |
| 90.98      |    |      | C   |   |        |        |        |      |

|            |    |     |     |   |        |        |        |      |
|------------|----|-----|-----|---|--------|--------|--------|------|
| ATOM       | 32 | O   | CYS | 3 | 19.977 | 0.070  | 13.404 |      |
| 1.00207.28 |    |     | O   |   |        |        |        |      |
| ATOM       | 33 | CB  | CYS | 3 | 19.912 | 1.440  | 15.945 | 1.00 |
| 37.83      |    |     | C   |   |        |        |        |      |
| ATOM       | 34 | SG  | CYS | 3 | 20.471 | 2.068  | 17.547 | 1.00 |
| 81.56      |    |     | S   |   |        |        |        |      |
| ATOM       | 35 | HN  | CYS | 3 | 22.351 | 0.703  | 15.584 |      |
| 1.00296.55 |    |     | H   |   |        |        |        |      |
| ATOM       | 36 | HA  | CYS | 3 | 19.962 | -0.600 | 16.586 |      |
| 1.00166.45 |    |     | H   |   |        |        |        |      |
| ATOM       | 37 | HB1 | CYS | 3 | 18.834 | 1.489  | 15.895 | 1.00 |
| 40.38      |    |     | H   |   |        |        |        |      |
| ATOM       | 38 | HB2 | CYS | 3 | 20.335 | 2.043  | 15.156 | 1.00 |
| 98.45      |    |     | H   |   |        |        |        |      |
| ATOM       | 39 | N   | SER | 4 | 19.180 | -1.717 | 14.515 | 1.00 |
| 85.31      |    |     | N   |   |        |        |        |      |
| ATOM       | 40 | CA  | SER | 4 | 18.614 | -2.330 | 13.319 | 1.00 |
| 92.94      |    |     | C   |   |        |        |        |      |
| ATOM       | 41 | C   | SER | 4 | 17.552 | -1.422 | 12.727 | 1.00 |
| 67.37      |    |     | C   |   |        |        |        |      |
| ATOM       | 42 | O   | SER | 4 | 17.462 | -1.248 | 11.512 |      |
| 1.00102.28 |    |     | O   |   |        |        |        |      |
| ATOM       | 43 | CB  | SER | 4 | 17.956 | -3.661 | 13.673 |      |
| 1.00123.83 |    |     | C   |   |        |        |        |      |
| ATOM       | 44 | OG  | SER | 4 | 17.535 | -4.307 | 12.478 |      |
| 1.00178.89 |    |     | O   |   |        |        |        |      |
| ATOM       | 45 | HN  | SER | 4 | 19.083 | -2.168 | 15.381 |      |
| 1.00163.03 |    |     | H   |   |        |        |        |      |
| ATOM       | 46 | HA  | SER | 4 | 19.393 | -2.499 | 12.593 |      |
| 1.00129.78 |    |     | H   |   |        |        |        |      |
| ATOM       | 47 | HB1 | SER | 4 | 17.096 | -3.470 | 14.309 |      |
| 1.00105.26 |    |     | H   |   |        |        |        |      |
| ATOM       | 48 | HB2 | SER | 4 | 18.656 | -4.291 | 14.195 |      |
| 1.00156.87 |    |     | H   |   |        |        |        |      |
| ATOM       | 49 | HG  | SER | 4 | 18.022 | -5.130 | 12.398 |      |
| 1.00218.16 |    |     | H   |   |        |        |        |      |
| ATOM       | 50 | N   | GLU | 5 | 16.733 | -0.866 | 13.613 | 1.00 |
| 41.67      |    |     | N   |   |        |        |        |      |
| ATOM       | 51 | CA  | GLU | 5 | 15.642 | 0.013  | 13.211 | 1.00 |
| 41.21      |    |     | C   |   |        |        |        |      |
| ATOM       | 52 | C   | GLU | 5 | 15.475 | 1.144  | 14.218 | 1.00 |
| 41.92      |    |     | C   |   |        |        |        |      |
| ATOM       | 53 | O   | GLU | 5 | 16.338 | 1.361  | 15.069 | 1.00 |
| 74.72      |    |     | O   |   |        |        |        |      |
| ATOM       | 54 | CB  | GLU | 5 | 14.354 | -0.801 | 13.123 | 1.00 |
| 49.24      |    |     | C   |   |        |        |        |      |
| ATOM       | 55 | CG  | GLU | 5 | 14.078 | -1.443 | 14.476 | 1.00 |
| 55.48      |    |     | C   |   |        |        |        |      |
| ATOM       | 56 | CD  | GLU | 5 | 12.950 | -2.462 | 14.355 | 1.00 |
| 92.06      |    |     | C   |   |        |        |        |      |
| ATOM       | 57 | OE1 | GLU | 5 | 12.453 | -2.639 | 13.255 |      |
| 1.00206.49 |    |     | O   |   |        |        |        |      |

|            |    |      |     |   |        |        |        |      |
|------------|----|------|-----|---|--------|--------|--------|------|
| ATOM       | 58 | OE2  | GLU | 5 | 12.599 | -3.051 | 15.364 |      |
| 1.00197.24 |    |      |     |   |        |        |        | O1-  |
| ATOM       | 59 | HN   | GLU | 5 | 16.855 | -1.065 | 14.564 | 1.00 |
| 45.52      |    |      | H   |   |        |        |        |      |
| ATOM       | 60 | HA   | GLU | 5 | 15.854 | 0.430  | 12.247 | 1.00 |
| 60.63      |    |      | H   |   |        |        |        |      |
| ATOM       | 61 | HB1  | GLU | 5 | 14.462 | -1.572 | 12.377 | 1.00 |
| 61.59      |    |      | H   |   |        |        |        |      |
| ATOM       | 62 | HB2  | GLU | 5 | 13.538 | -0.155 | 12.859 | 1.00 |
| 63.66      |    |      | H   |   |        |        |        |      |
| ATOM       | 63 | HG1  | GLU | 5 | 13.795 | -0.679 | 15.185 | 1.00 |
| 58.03      |    |      | H   |   |        |        |        |      |
| ATOM       | 64 | HG2  | GLU | 5 | 14.974 | -1.933 | 14.817 | 1.00 |
| 57.77      |    |      | H   |   |        |        |        |      |
| ATOM       | 65 | N    | ASN | 6 | 14.363 | 1.864  | 14.120 | 1.00 |
| 50.73      |    |      | N   |   |        |        |        |      |
| ATOM       | 66 | CA   | ASN | 6 | 14.105 | 2.972  | 15.033 | 1.00 |
| 71.04      |    |      | C   |   |        |        |        |      |
| ATOM       | 67 | C    | ASN | 6 | 14.059 | 2.469  | 16.473 | 1.00 |
| 65.17      |    |      | C   |   |        |        |        |      |
| ATOM       | 68 | O    | ASN | 6 | 14.563 | 3.125  | 17.385 | 1.00 |
| 94.86      |    |      | O   |   |        |        |        |      |
| ATOM       | 69 | CB   | ASN | 6 | 12.776 | 3.641  | 14.681 | 1.00 |
| 94.83      |    |      | C   |   |        |        |        |      |
| ATOM       | 70 | CG   | ASN | 6 | 12.914 | 4.418  | 13.375 |      |
| 1.00160.94 |    |      |     |   |        |        |        | C    |
| ATOM       | 71 | ND2  | ASN | 6 | 11.844 | 4.725  | 12.693 |      |
| 1.00244.88 |    |      |     |   |        |        |        | N    |
| ATOM       | 72 | OD1  | ASN | 6 | 14.026 | 4.754  | 12.965 |      |
| 1.00219.73 |    |      |     |   |        |        |        | O    |
| ATOM       | 73 | HN   | ASN | 6 | 13.708 | 1.649  | 13.423 | 1.00 |
| 72.81      |    |      | H   |   |        |        |        |      |
| ATOM       | 74 | HA   | ASN | 6 | 14.899 | 3.697  | 14.939 | 1.00 |
| 96.02      |    |      | H   |   |        |        |        |      |
| ATOM       | 75 | HB1  | ASN | 6 | 12.496 | 4.321  | 15.472 |      |
| 1.00111.09 |    |      |     |   |        |        |        | H    |
| ATOM       | 76 | HB2  | ASN | 6 | 12.013 | 2.886  | 14.569 | 1.00 |
| 98.13      |    |      | H   |   |        |        |        |      |
| ATOM       | 77 | HD21 | ASN | 6 | 10.961 | 4.457  | 13.021 |      |
| 1.00272.43 |    |      |     |   |        |        |        | H    |
| ATOM       | 78 | HD22 | ASN | 6 | 11.925 | 5.224  | 11.853 |      |
| 1.00336.78 |    |      |     |   |        |        |        | H    |
| ATOM       | 79 | N    | GLY | 7 | 13.456 | 1.297  | 16.669 | 1.00 |
| 51.80      |    |      | N   |   |        |        |        |      |
| ATOM       | 80 | CA   | GLY | 7 | 13.347 | 0.696  | 18.001 | 1.00 |
| 71.47      |    |      | C   |   |        |        |        |      |
| ATOM       | 81 | C    | GLY | 7 | 13.985 | -0.686 | 18.019 | 1.00 |
| 41.04      |    |      | C   |   |        |        |        |      |
| ATOM       | 82 | O    | GLY | 7 | 13.307 | -1.694 | 18.214 | 1.00 |
| 44.54      |    |      | O   |   |        |        |        |      |
| ATOM       | 83 | HN   | GLY | 7 | 13.079 | 0.822  | 15.899 | 1.00 |
| 45.49      |    |      | H   |   |        |        |        |      |

|            |     |     |     |    |        |        |        |      |
|------------|-----|-----|-----|----|--------|--------|--------|------|
| ATOM       | 84  | HA1 | GLY | 7  | 12.309 | 0.602  | 18.261 |      |
| 1.00103.52 |     |     |     |    |        |        |        | H    |
| ATOM       | 85  | HA2 | GLY | 7  | 13.841 | 1.325  | 18.732 |      |
| 1.00108.67 |     |     |     |    |        |        |        | H    |
| ATOM       | 86  | N   | ASP | 8  | 15.294 | -0.723 | 17.813 | 1.00 |
| 27.00      |     |     | N   |    |        |        |        |      |
| ATOM       | 87  | CA  | ASP | 8  | 16.023 | -1.987 | 17.804 | 1.00 |
| 14.15      |     |     | C   |    |        |        |        |      |
| ATOM       | 88  | C   | ASP | 8  | 15.896 | -2.690 | 19.149 | 1.00 |
| 9.37       |     |     | C   |    |        |        |        |      |
| ATOM       | 89  | O   | ASP | 8  | 15.642 | -3.892 | 19.210 | 1.00 |
| 14.61      |     |     | O   |    |        |        |        |      |
| ATOM       | 90  | CB  | ASP | 8  | 17.500 | -1.738 | 17.493 | 1.00 |
| 15.06      |     |     | C   |    |        |        |        |      |
| ATOM       | 91  | CG  | ASP | 8  | 18.243 | -3.066 | 17.394 | 1.00 |
| 21.22      |     |     | C   |    |        |        |        |      |
| ATOM       | 92  | OD1 | ASP | 8  | 17.640 | -4.083 | 17.695 |      |
| 1.00119.56 |     |     |     |    |        |        |        | O    |
| ATOM       | 93  | OD2 | ASP | 8  | 19.403 | -3.048 | 17.019 |      |
| 1.00133.27 |     |     |     |    |        |        |        | O1-  |
| ATOM       | 94  | HN  | ASP | 8  | 15.775 | 0.115  | 17.662 | 1.00 |
| 35.63      |     |     | H   |    |        |        |        |      |
| ATOM       | 95  | HA  | ASP | 8  | 15.610 | -2.622 | 17.040 | 1.00 |
| 20.92      |     |     | H   |    |        |        |        |      |
| ATOM       | 96  | HB1 | ASP | 8  | 17.936 | -1.144 | 18.282 | 1.00 |
| 29.39      |     |     | H   |    |        |        |        |      |
| ATOM       | 97  | HB2 | ASP | 8  | 17.584 | -1.210 | 16.556 | 1.00 |
| 44.14      |     |     | H   |    |        |        |        |      |
| ATOM       | 98  | N   | CYS | 9  | 16.067 | -1.930 | 20.222 | 1.00 |
| 5.93       |     |     | N   |    |        |        |        |      |
| ATOM       | 99  | CA  | CYS | 9  | 15.962 | -2.489 | 21.564 | 1.00 |
| 7.54       |     |     | C   |    |        |        |        |      |
| ATOM       | 100 | C   | CYS | 9  | 14.556 | -3.022 | 21.802 | 1.00 |
| 14.60      |     |     | C   |    |        |        |        |      |
| ATOM       | 101 | O   | CYS | 9  | 14.369 | -4.094 | 22.377 | 1.00 |
| 25.78      |     |     | O   |    |        |        |        |      |
| ATOM       | 102 | CB  | CYS | 9  | 16.292 | -1.423 | 22.598 | 1.00 |
| 6.63       |     |     | C   |    |        |        |        |      |
| ATOM       | 103 | SG  | CYS | 9  | 18.059 | -1.084 | 22.515 | 1.00 |
| 10.91      |     |     | S   |    |        |        |        |      |
| ATOM       | 104 | HN  | CYS | 9  | 16.262 | -0.978 | 20.107 | 1.00 |
| 6.51       |     |     | H   |    |        |        |        |      |
| ATOM       | 105 | HA  | CYS | 9  | 16.674 | -3.291 | 21.663 | 1.00 |
| 11.12      |     |     | H   |    |        |        |        |      |
| ATOM       | 106 | HB1 | CYS | 9  | 16.042 | -1.777 | 23.585 | 1.00 |
| 11.28      |     |     | H   |    |        |        |        |      |
| ATOM       | 107 | HB2 | CYS | 9  | 15.737 | -0.521 | 22.382 | 1.00 |
| 5.04       |     |     | H   |    |        |        |        |      |
| ATOM       | 108 | N   | ALA | 10 | 13.573 | -2.259 | 21.342 | 1.00 |
| 16.26      |     |     | N   |    |        |        |        |      |
| ATOM       | 109 | CA  | ALA | 10 | 12.174 | -2.639 | 21.485 | 1.00 |
| 32.04      |     |     | C   |    |        |        |        |      |

|            |     |     |     |    |        |        |        |      |
|------------|-----|-----|-----|----|--------|--------|--------|------|
| ATOM       | 110 | C   | ALA | 10 | 11.292 | -1.689 | 20.677 | 1.00 |
| 45.47      |     |     | C   |    |        |        |        |      |
| ATOM       | 111 | O   | ALA | 10 | 11.745 | -0.631 | 20.244 |      |
| 1.00119.04 |     |     | O   |    |        |        |        |      |
| ATOM       | 112 | CB  | ALA | 10 | 11.765 | -2.609 | 22.963 | 1.00 |
| 30.10      |     |     | C   |    |        |        |        |      |
| ATOM       | 113 | HN  | ALA | 10 | 13.796 | -1.420 | 20.887 | 1.00 |
| 12.81      |     |     | H   |    |        |        |        |      |
| ATOM       | 114 | HA  | ALA | 10 | 12.045 | -3.642 | 21.106 | 1.00 |
| 47.14      |     |     | H   |    |        |        |        |      |
| ATOM       | 115 | HB1 | ALA | 10 | 12.591 | -2.946 | 23.571 | 1.00 |
| 84.37      |     |     | H   |    |        |        |        |      |
| ATOM       | 116 | HB2 | ALA | 10 | 10.918 | -3.263 | 23.117 |      |
| 1.00118.20 |     |     | H   |    |        |        |        |      |
| ATOM       | 117 | HB3 | ALA | 10 | 11.497 | -1.603 | 23.246 |      |
| 1.00117.32 |     |     | H   |    |        |        |        |      |
| ATOM       | 118 | N   | ALA | 11 | 10.039 | -2.073 | 20.472 | 1.00 |
| 30.62      |     |     | N   |    |        |        |        |      |
| ATOM       | 119 | CA  | ALA | 11 | 9.117  | -1.239 | 19.710 | 1.00 |
| 35.24      |     |     | C   |    |        |        |        |      |
| ATOM       | 120 | C   | ALA | 11 | 8.928  | 0.118  | 20.385 | 1.00 |
| 22.78      |     |     | C   |    |        |        |        |      |
| ATOM       | 121 | O   | ALA | 11 | 8.882  | 1.150  | 19.716 | 1.00 |
| 53.33      |     |     | O   |    |        |        |        |      |
| ATOM       | 122 | CB  | ALA | 11 | 7.763  | -1.943 | 19.584 | 1.00 |
| 60.49      |     |     | C   |    |        |        |        |      |
| ATOM       | 123 | HN  | ALA | 11 | 9.730  | -2.929 | 20.837 | 1.00 |
| 50.37      |     |     | H   |    |        |        |        |      |
| ATOM       | 124 | HA  | ALA | 11 | 9.521  | -1.086 | 18.721 | 1.00 |
| 41.70      |     |     | H   |    |        |        |        |      |
| ATOM       | 125 | HB1 | ALA | 11 | 7.899  | -2.903 | 19.110 |      |
| 1.00157.06 |     |     | H   |    |        |        |        |      |
| ATOM       | 126 | HB2 | ALA | 11 | 7.097  | -1.337 | 18.988 |      |
| 1.00148.83 |     |     | H   |    |        |        |        |      |
| ATOM       | 127 | HB3 | ALA | 11 | 7.338  | -2.082 | 20.567 |      |
| 1.00137.06 |     |     | H   |    |        |        |        |      |
| ATOM       | 128 | N   | ASP | 12 | 8.814  | 0.108  | 21.711 | 1.00 |
| 18.98      |     |     | N   |    |        |        |        |      |
| ATOM       | 129 | CA  | ASP | 12 | 8.625  | 1.346  | 22.465 | 1.00 |
| 31.05      |     |     | C   |    |        |        |        |      |
| ATOM       | 130 | C   | ASP | 12 | 9.958  | 2.038  | 22.737 | 1.00 |
| 22.98      |     |     | C   |    |        |        |        |      |
| ATOM       | 131 | O   | ASP | 12 | 10.027 | 3.266  | 22.805 | 1.00 |
| 37.14      |     |     | O   |    |        |        |        |      |
| ATOM       | 132 | CB  | ASP | 12 | 7.930  | 1.041  | 23.794 | 1.00 |
| 48.35      |     |     | C   |    |        |        |        |      |
| ATOM       | 133 | CG  | ASP | 12 | 6.488  | 0.613  | 23.540 |      |
| 1.00104.83 |     |     | C   |    |        |        |        |      |
| ATOM       | 134 | OD1 | ASP | 12 | 6.013  | 0.828  | 22.437 |      |
| 1.00258.73 |     |     | O   |    |        |        |        |      |
| ATOM       | 135 | OD2 | ASP | 12 | 5.881  | 0.077  | 24.453 |      |
| 1.00213.46 |     |     | O1- |    |        |        |        |      |

|            |     |     |     |    |        |        |        |      |
|------------|-----|-----|-----|----|--------|--------|--------|------|
| ATOM       | 136 | HN  | ASP | 12 | 8.855  | -0.745 | 22.191 | 1.00 |
| 36.19      |     | H   |     |    |        |        |        |      |
| ATOM       | 137 | HA  | ASP | 12 | 7.997  | 2.012  | 21.894 | 1.00 |
| 49.76      |     | H   |     |    |        |        |        |      |
| ATOM       | 138 | HB1 | ASP | 12 | 7.937  | 1.925  | 24.412 | 1.00 |
| 95.71      |     | H   |     |    |        |        |        |      |
| ATOM       | 139 | HB2 | ASP | 12 | 8.456  | 0.246  | 24.299 | 1.00 |
| 54.37      |     | H   |     |    |        |        |        |      |
| ATOM       | 140 | N   | GLU | 13 | 11.013 | 1.248  | 22.902 | 1.00 |
| 17.60      |     | N   |     |    |        |        |        |      |
| ATOM       | 141 | CA  | GLU | 13 | 12.337 | 1.800  | 23.178 | 1.00 |
| 12.01      |     | C   |     |    |        |        |        |      |
| ATOM       | 142 | C   | GLU | 13 | 12.946 | 2.427  | 21.925 | 1.00 |
| 10.07      |     | C   |     |    |        |        |        |      |
| ATOM       | 143 | O   | GLU | 13 | 12.618 | 2.044  | 20.802 | 1.00 |
| 12.81      |     | O   |     |    |        |        |        |      |
| ATOM       | 144 | CB  | GLU | 13 | 13.262 | 0.701  | 23.702 | 1.00 |
| 11.74      |     | C   |     |    |        |        |        |      |
| ATOM       | 145 | CG  | GLU | 13 | 12.740 | 0.200  | 25.050 | 1.00 |
| 13.49      |     | C   |     |    |        |        |        |      |
| ATOM       | 146 | CD  | GLU | 13 | 12.921 | 1.279  | 26.111 |      |
| 1.00142.36 |     |     |     |    |        |        |        | C    |
| ATOM       | 147 | OE1 | GLU | 13 | 13.681 | 2.201  | 25.866 |      |
| 1.00339.06 |     |     |     |    |        |        |        | O    |
| ATOM       | 148 | OE2 | GLU | 13 | 12.295 | 1.170  | 27.151 |      |
| 1.00335.28 |     |     |     |    |        |        |        | O1-  |
| ATOM       | 149 | HN  | GLU | 13 | 10.899 | 0.275  | 22.845 | 1.00 |
| 28.36      |     | H   |     |    |        |        |        |      |
| ATOM       | 150 | HA  | GLU | 13 | 12.242 | 2.560  | 23.938 | 1.00 |
| 13.06      |     | H   |     |    |        |        |        |      |
| ATOM       | 151 | HB1 | GLU | 13 | 14.257 | 1.099  | 23.829 | 1.00 |
| 13.76      |     | H   |     |    |        |        |        |      |
| ATOM       | 152 | HB2 | GLU | 13 | 13.287 | -0.116 | 22.996 | 1.00 |
| 9.94       |     | H   |     |    |        |        |        |      |
| ATOM       | 153 | HG1 | GLU | 13 | 13.289 | -0.684 | 25.343 | 1.00 |
| 66.02      |     | H   |     |    |        |        |        |      |
| ATOM       | 154 | HG2 | GLU | 13 | 11.691 | -0.042 | 24.963 | 1.00 |
| 56.23      |     | H   |     |    |        |        |        |      |
| ATOM       | 155 | N   | CYS | 14 | 13.842 | 3.395  | 22.133 | 1.00 |
| 9.12       |     | N   |     |    |        |        |        |      |
| ATOM       | 156 | CA  | CYS | 14 | 14.511 | 4.083  | 21.025 | 1.00 |
| 10.69      |     | C   |     |    |        |        |        |      |
| ATOM       | 157 | C   | CYS | 14 | 15.916 | 3.529  | 20.831 | 1.00 |
| 9.56       |     | C   |     |    |        |        |        |      |
| ATOM       | 158 | O   | CYS | 14 | 16.506 | 2.977  | 21.759 | 1.00 |
| 13.62      |     | O   |     |    |        |        |        |      |
| ATOM       | 159 | CB  | CYS | 14 | 14.596 | 5.583  | 21.317 | 1.00 |
| 13.96      |     | C   |     |    |        |        |        |      |
| ATOM       | 160 | SG  | CYS | 14 | 15.403 | 6.424  | 19.928 | 1.00 |
| 42.96      |     | S   |     |    |        |        |        |      |
| ATOM       | 161 | HN  | CYS | 14 | 14.064 | 3.650  | 23.053 | 1.00 |
| 9.76       |     | H   |     |    |        |        |        |      |

|            |     |      |     |    |        |       |        |      |
|------------|-----|------|-----|----|--------|-------|--------|------|
| ATOM       | 162 | HA   | CYS | 14 | 13.946 | 3.936 | 20.114 | 1.00 |
| 15.54      |     |      | H   |    |        |       |        |      |
| ATOM       | 163 | HB1  | CYS | 14 | 15.172 | 5.741 | 22.216 | 1.00 |
| 50.72      |     |      | H   |    |        |       |        |      |
| ATOM       | 164 | HB2  | CYS | 14 | 13.601 | 5.981 | 21.450 | 1.00 |
| 46.13      |     |      | H   |    |        |       |        |      |
| ATOM       | 165 | N    | CYS | 15 | 16.454 | 3.682 | 19.623 | 1.00 |
| 9.60       |     |      | N   |    |        |       |        |      |
| ATOM       | 166 | CA   | CYS | 15 | 17.797 | 3.198 | 19.320 | 1.00 |
| 9.28       |     |      | C   |    |        |       |        |      |
| ATOM       | 167 | C    | CYS | 15 | 18.409 | 4.062 | 18.227 | 1.00 |
| 9.92       |     |      | C   |    |        |       |        |      |
| ATOM       | 168 | O    | CYS | 15 | 17.783 | 4.298 | 17.193 | 1.00 |
| 13.31      |     |      | O   |    |        |       |        |      |
| ATOM       | 169 | CB   | CYS | 15 | 17.741 | 1.741 | 18.852 | 1.00 |
| 12.90      |     |      | C   |    |        |       |        |      |
| ATOM       | 170 | SG   | CYS | 15 | 19.402 | 1.017 | 18.903 | 1.00 |
| 39.11      |     |      | S   |    |        |       |        |      |
| ATOM       | 171 | HN   | CYS | 15 | 15.939 | 4.136 | 18.923 | 1.00 |
| 13.12      |     |      | H   |    |        |       |        |      |
| ATOM       | 172 | HA   | CYS | 15 | 18.412 | 3.262 | 20.206 | 1.00 |
| 8.26       |     |      | H   |    |        |       |        |      |
| ATOM       | 173 | HB1  | CYS | 15 | 17.363 | 1.703 | 17.839 | 1.00 |
| 24.82      |     |      | H   |    |        |       |        |      |
| ATOM       | 174 | HB2  | CYS | 15 | 17.085 | 1.181 | 19.500 | 1.00 |
| 27.31      |     |      | H   |    |        |       |        |      |
| ATOM       | 175 | N    | VAL | 16 | 19.628 | 4.542 | 18.454 | 1.00 |
| 9.56       |     |      | N   |    |        |       |        |      |
| ATOM       | 176 | CA   | VAL | 16 | 20.292 | 5.387 | 17.468 | 1.00 |
| 11.99      |     |      | C   |    |        |       |        |      |
| ATOM       | 177 | C    | VAL | 16 | 21.806 | 5.233 | 17.561 | 1.00 |
| 7.73       |     |      | C   |    |        |       |        |      |
| ATOM       | 178 | O    | VAL | 16 | 22.382 | 5.291 | 18.648 | 1.00 |
| 8.83       |     |      | O   |    |        |       |        |      |
| ATOM       | 179 | CB   | VAL | 16 | 19.896 | 6.847 | 17.698 | 1.00 |
| 18.37      |     |      | C   |    |        |       |        |      |
| ATOM       | 180 | CG1  | VAL | 16 | 20.327 | 7.284 | 19.100 | 1.00 |
| 39.61      |     |      | C   |    |        |       |        |      |
| ATOM       | 181 | CG2  | VAL | 16 | 20.575 | 7.730 | 16.652 |      |
| 1.00115.21 |     |      |     |    |        |       |        | C    |
| ATOM       | 182 | HN   | VAL | 16 | 20.086 | 4.331 | 19.298 | 1.00 |
| 9.76       |     |      | H   |    |        |       |        |      |
| ATOM       | 183 | HA   | VAL | 16 | 19.976 | 5.095 | 16.477 | 1.00 |
| 17.27      |     |      | H   |    |        |       |        |      |
| ATOM       | 184 | HB   | VAL | 16 | 18.824 | 6.943 | 17.608 | 1.00 |
| 52.63      |     |      | H   |    |        |       |        |      |
| ATOM       | 185 | HG11 | VAL | 16 | 19.879 | 8.239 | 19.333 |      |
| 1.00128.07 |     |      |     |    |        |       |        | H    |
| ATOM       | 186 | HG12 | VAL | 16 | 21.403 | 7.374 | 19.135 |      |
| 1.00154.13 |     |      |     |    |        |       |        | H    |
| ATOM       | 187 | HG13 | VAL | 16 | 20.002 | 6.549 | 19.821 |      |
| 1.00135.74 |     |      |     |    |        |       |        | H    |



|            |     |      |     |    |        |       |        |      |
|------------|-----|------|-----|----|--------|-------|--------|------|
| ATOM       | 188 | HG21 | VAL | 16 | 21.641 | 7.730 | 16.818 |      |
| 1.00229.05 |     |      |     |    |        |       |        | H    |
| ATOM       | 189 | HG22 | VAL | 16 | 20.198 | 8.738 | 16.733 |      |
| 1.00261.82 |     |      |     |    |        |       |        | H    |
| ATOM       | 190 | HG23 | VAL | 16 | 20.363 | 7.345 | 15.667 |      |
| 1.00210.07 |     |      |     |    |        |       |        | H    |
| ATOM       | 191 | N    | ASP | 17 | 22.444 | 5.028 | 16.411 | 1.00 |
| 14.34      |     |      | N   |    |        |       |        |      |
| ATOM       | 192 | CA   | ASP | 17 | 23.894 | 4.859 | 16.362 | 1.00 |
| 11.90      |     |      | C   |    |        |       |        |      |
| ATOM       | 193 | C    | ASP | 17 | 24.579 | 6.183 | 16.045 | 1.00 |
| 13.15      |     |      | C   |    |        |       |        |      |
| ATOM       | 194 | O    | ASP | 17 | 24.347 | 6.779 | 14.992 | 1.00 |
| 25.96      |     |      | O   |    |        |       |        |      |
| ATOM       | 195 | CB   | ASP | 17 | 24.259 | 3.831 | 15.288 | 1.00 |
| 20.80      |     |      | C   |    |        |       |        |      |
| ATOM       | 196 | CG   | ASP | 17 | 23.814 | 2.440 | 15.725 | 1.00 |
| 28.72      |     |      | C   |    |        |       |        |      |
| ATOM       | 197 | OD1  | ASP | 17 | 23.538 | 2.271 | 16.902 |      |
| 1.00135.42 |     |      |     |    |        |       |        | O    |
| ATOM       | 198 | OD2  | ASP | 17 | 23.752 | 1.566 | 14.877 |      |
| 1.00114.17 |     |      |     |    |        |       |        | O1-  |
| ATOM       | 199 | HN   | ASP | 17 | 21.928 | 4.986 | 15.578 | 1.00 |
| 28.29      |     |      | H   |    |        |       |        |      |
| ATOM       | 200 | HA   | ASP | 17 | 24.249 | 4.500 | 17.319 | 1.00 |
| 10.49      |     |      | H   |    |        |       |        |      |
| ATOM       | 201 | HB1  | ASP | 17 | 25.328 | 3.833 | 15.138 | 1.00 |
| 22.42      |     |      | H   |    |        |       |        |      |
| ATOM       | 202 | HB2  | ASP | 17 | 23.767 | 4.092 | 14.362 | 1.00 |
| 29.52      |     |      | H   |    |        |       |        |      |
| ATOM       | 203 | N    | THR | 18 | 25.434 | 6.632 | 16.960 | 1.00 |
| 11.55      |     |      | N   |    |        |       |        |      |
| ATOM       | 204 | CA   | THR | 18 | 26.171 | 7.885 | 16.782 | 1.00 |
| 17.10      |     |      | C   |    |        |       |        |      |
| ATOM       | 205 | C    | THR | 18 | 27.634 | 7.592 | 16.477 | 1.00 |
| 10.63      |     |      | C   |    |        |       |        |      |
| ATOM       | 206 | O    | THR | 18 | 28.121 | 6.495 | 16.740 | 1.00 |
| 6.49       |     |      | O   |    |        |       |        |      |
| ATOM       | 207 | CB   | THR | 18 | 26.074 | 8.738 | 18.051 | 1.00 |
| 28.52      |     |      | C   |    |        |       |        |      |
| ATOM       | 208 | CG2  | THR | 18 | 24.697 | 9.391 | 18.138 | 1.00 |
| 45.38      |     |      | C   |    |        |       |        |      |
| ATOM       | 209 | OG1  | THR | 18 | 26.285 | 7.912 | 19.185 | 1.00 |
| 26.49      |     |      | O   |    |        |       |        |      |
| ATOM       | 210 | HN   | THR | 18 | 25.581 | 6.106 | 17.774 | 1.00 |
| 13.96      |     |      | H   |    |        |       |        |      |
| ATOM       | 211 | HA   | THR | 18 | 25.748 | 8.441 | 15.955 | 1.00 |
| 26.43      |     |      | H   |    |        |       |        |      |
| ATOM       | 212 | HB   | THR | 18 | 26.831 | 9.509 | 18.026 | 1.00 |
| 37.43      |     |      | H   |    |        |       |        |      |
| ATOM       | 213 | HG1  | THR | 18 | 25.439 | 7.788 | 19.622 | 1.00 |
| 71.62      |     |      | H   |    |        |       |        |      |

|            |     |      |     |    |        |        |        |      |
|------------|-----|------|-----|----|--------|--------|--------|------|
| ATOM       | 214 | HG21 | THR | 18 | 23.938 | 8.664  | 17.893 |      |
| 1.00100.44 |     |      |     |    |        |        |        | H    |
| ATOM       | 215 | HG22 | THR | 18 | 24.648 | 10.215 | 17.440 |      |
| 1.00129.42 |     |      |     |    |        |        |        | H    |
| ATOM       | 216 | HG23 | THR | 18 | 24.536 | 9.757  | 19.140 |      |
| 1.00156.21 |     |      |     |    |        |        |        | H    |
| ATOM       | 217 | N    | VAL | 19 | 28.323 | 8.591  | 15.935 | 1.00 |
| 16.32      |     |      | N   |    |        |        |        |      |
| ATOM       | 218 | CA   | VAL | 19 | 29.721 | 8.468  | 15.600 | 1.00 |
| 13.34      |     |      | C   |    |        |        |        |      |
| ATOM       | 219 | C    | VAL | 19 | 30.184 | 9.751  | 14.936 | 1.00 |
| 25.88      |     |      | C   |    |        |        |        |      |
| ATOM       | 220 | O    | VAL | 19 | 29.671 | 10.170 | 13.898 | 1.00 |
| 42.11      |     |      | O   |    |        |        |        |      |
| ATOM       | 221 | CB   | VAL | 19 | 29.985 | 7.273  | 14.687 | 1.00 |
| 15.48      |     |      | C   |    |        |        |        |      |
| ATOM       | 222 | CG1  | VAL | 19 | 28.996 | 7.277  | 13.517 | 1.00 |
| 29.06      |     |      | C   |    |        |        |        |      |
| ATOM       | 223 | CG2  | VAL | 19 | 31.420 | 7.362  | 14.148 | 1.00 |
| 20.67      |     |      | C   |    |        |        |        |      |
| ATOM       | 224 | HN   | VAL | 19 | 27.884 | 9.444  | 15.770 | 1.00 |
| 26.89      |     |      | H   |    |        |        |        |      |
| ATOM       | 225 | HA   | VAL | 19 | 30.284 | 8.336  | 16.515 | 1.00 |
| 8.08       |     |      | H   |    |        |        |        |      |
| ATOM       | 226 | HB   | VAL | 19 | 29.870 | 6.366  | 15.257 | 1.00 |
| 11.49      |     |      | H   |    |        |        |        |      |
| ATOM       | 227 | HG11 | VAL | 19 | 27.988 | 7.362  | 13.897 |      |
| 1.00137.43 |     |      |     |    |        |        |        | H    |
| ATOM       | 228 | HG12 | VAL | 19 | 29.094 | 6.356  | 12.961 | 1.00 |
| 93.29      |     |      | H   |    |        |        |        |      |
| ATOM       | 229 | HG13 | VAL | 19 | 29.208 | 8.112  | 12.868 |      |
| 1.00108.69 |     |      |     |    |        |        |        | H    |
| ATOM       | 230 | HG21 | VAL | 19 | 31.464 | 8.103  | 13.364 | 1.00 |
| 99.42      |     |      | H   |    |        |        |        |      |
| ATOM       | 231 | HG22 | VAL | 19 | 31.721 | 6.402  | 13.757 |      |
| 1.00111.36 |     |      |     |    |        |        |        | H    |
| ATOM       | 232 | HG23 | VAL | 19 | 32.086 | 7.652  | 14.950 | 1.00 |
| 77.11      |     |      | H   |    |        |        |        |      |
| ATOM       | 233 | N    | PHE | 20 | 31.139 | 10.364 | 15.581 | 1.00 |
| 24.58      |     |      | N   |    |        |        |        |      |
| ATOM       | 234 | CA   | PHE | 20 | 31.709 | 11.624 | 15.136 | 1.00 |
| 40.34      |     |      | C   |    |        |        |        |      |
| ATOM       | 235 | C    | PHE | 20 | 32.950 | 11.402 | 14.275 | 1.00 |
| 40.37      |     |      | C   |    |        |        |        |      |
| ATOM       | 236 | O    | PHE | 20 | 32.862 | 11.232 | 13.060 | 1.00 |
| 66.02      |     |      | O   |    |        |        |        |      |
| ATOM       | 237 | CB   | PHE | 20 | 32.067 | 12.477 | 16.375 | 1.00 |
| 48.79      |     |      | C   |    |        |        |        |      |
| ATOM       | 238 | CG   | PHE | 20 | 32.368 | 11.590 | 17.577 | 1.00 |
| 35.75      |     |      | C   |    |        |        |        |      |
| ATOM       | 239 | CD1  | PHE | 20 | 31.344 | 10.833 | 18.180 | 1.00 |
| 30.20      |     |      | C   |    |        |        |        |      |

|            |     |     |     |    |        |        |        |      |
|------------|-----|-----|-----|----|--------|--------|--------|------|
| ATOM       | 240 | CD2 | PHE | 20 | 33.666 | 11.538 | 18.100 | 1.00 |
| 40.95      |     | C   |     |    |        |        |        |      |
| ATOM       | 241 | CE1 | PHE | 20 | 31.629 | 10.033 | 19.290 | 1.00 |
| 30.41      |     | C   |     |    |        |        |        |      |
| ATOM       | 242 | CE2 | PHE | 20 | 33.946 | 10.736 | 19.211 | 1.00 |
| 45.84      |     | C   |     |    |        |        |        |      |
| ATOM       | 243 | CZ  | PHE | 20 | 32.929 | 9.982  | 19.805 | 1.00 |
| 40.81      |     | C   |     |    |        |        |        |      |
| ATOM       | 244 | HN  | PHE | 20 | 31.456 | 9.963  | 16.405 | 1.00 |
| 16.73      |     | H   |     |    |        |        |        |      |
| ATOM       | 245 | HA  | PHE | 20 | 30.975 | 12.159 | 14.549 | 1.00 |
| 59.91      |     | H   |     |    |        |        |        |      |
| ATOM       | 246 | HB1 | PHE | 20 | 31.241 | 13.104 | 16.613 | 1.00 |
| 67.15      |     | H   |     |    |        |        |        |      |
| ATOM       | 247 | HB2 | PHE | 20 | 32.925 | 13.100 | 16.165 | 1.00 |
| 58.17      |     | H   |     |    |        |        |        |      |
| ATOM       | 248 | HD1 | PHE | 20 | 30.337 | 10.858 | 17.782 | 1.00 |
| 33.34      |     | H   |     |    |        |        |        |      |
| ATOM       | 249 | HD2 | PHE | 20 | 34.450 | 12.120 | 17.647 | 1.00 |
| 49.35      |     | H   |     |    |        |        |        |      |
| ATOM       | 250 | HE1 | PHE | 20 | 30.845 | 9.456  | 19.750 | 1.00 |
| 30.61      |     | H   |     |    |        |        |        |      |
| ATOM       | 251 | HE2 | PHE | 20 | 34.950 | 10.695 | 19.609 | 1.00 |
| 61.27      |     | H   |     |    |        |        |        |      |
| ATOM       | 252 | HZ  | PHE | 20 | 33.146 | 9.363  | 20.663 | 1.00 |
| 52.66      |     | H   |     |    |        |        |        |      |
| ATOM       | 253 | N   | GLU | 21 | 34.099 | 11.442 | 14.924 | 1.00 |
| 41.31      |     | N   |     |    |        |        |        |      |
| ATOM       | 254 | CA  | GLU | 21 | 35.377 | 11.285 | 14.246 | 1.00 |
| 56.16      |     | C   |     |    |        |        |        |      |
| ATOM       | 255 | C   | GLU | 21 | 35.686 | 9.808  | 13.979 | 1.00 |
| 58.61      |     | C   |     |    |        |        |        |      |
| ATOM       | 256 | O   | GLU | 21 | 36.523 | 9.489  | 13.136 |      |
| 1.00201.19 |     |     | O   |    |        |        |        |      |
| ATOM       | 257 | CB  | GLU | 21 | 36.457 | 11.946 | 15.123 | 1.00 |
| 57.37      |     | C   |     |    |        |        |        |      |
| ATOM       | 258 | CG  | GLU | 21 | 37.842 | 11.332 | 14.873 |      |
| 1.00193.56 |     |     | C   |    |        |        |        |      |
| ATOM       | 259 | CD  | GLU | 21 | 38.914 | 12.178 | 15.550 |      |
| 1.00304.62 |     |     | C   |    |        |        |        |      |
| ATOM       | 260 | OE1 | GLU | 21 | 40.025 | 12.206 | 15.047 |      |
| 1.00451.81 |     |     | O   |    |        |        |        |      |
| ATOM       | 261 | OE2 | GLU | 21 | 38.610 | 12.785 | 16.563 |      |
| 1.00442.88 |     |     | O1- |    |        |        |        |      |
| ATOM       | 262 | HN  | GLU | 21 | 34.091 | 11.603 | 15.890 | 1.00 |
| 50.82      |     | H   |     |    |        |        |        |      |
| ATOM       | 263 | HA  | GLU | 21 | 35.335 | 11.805 | 13.299 | 1.00 |
| 85.72      |     | H   |     |    |        |        |        |      |
| ATOM       | 264 | HB1 | GLU | 21 | 36.182 | 11.819 | 16.159 | 1.00 |
| 46.37      |     | H   |     |    |        |        |        |      |
| ATOM       | 265 | HB2 | GLU | 21 | 36.496 | 13.005 | 14.899 |      |
| 1.00131.81 |     |     | H   |    |        |        |        |      |

|      |            |     |     |    |        |        |        |      |
|------|------------|-----|-----|----|--------|--------|--------|------|
| ATOM | 266        | HG1 | GLU | 21 | 38.032 | 11.296 | 13.810 |      |
|      | 1.00314.91 |     |     |    |        |        |        | H    |
| ATOM | 267        | HG2 | GLU | 21 | 37.869 | 10.331 | 15.278 |      |
|      | 1.00266.92 |     |     |    |        |        |        | H    |
| ATOM | 268        | N   | GLY | 22 | 35.011 | 8.916  | 14.696 | 1.00 |
|      | 86.70      |     | N   |    |        |        |        |      |
| ATOM | 269        | CA  | GLY | 22 | 35.230 | 7.480  | 14.519 |      |
|      | 1.00104.66 |     |     |    |        |        |        | C    |
| ATOM | 270        | C   | GLY | 22 | 36.271 | 6.956  | 15.501 | 1.00 |
|      | 71.50      |     | C   |    |        |        |        |      |
| ATOM | 271        | O   | GLY | 22 | 36.469 | 5.747  | 15.619 | 1.00 |
|      | 89.87      |     | O   |    |        |        |        |      |
| ATOM | 272        | HN  | GLY | 22 | 34.354 | 9.226  | 15.356 |      |
|      | 1.00214.64 |     |     |    |        |        |        | H    |
| ATOM | 273        | HA1 | GLY | 22 | 35.568 | 7.287  | 13.511 |      |
|      | 1.00152.47 |     |     |    |        |        |        | H    |
| ATOM | 274        | HA2 | GLY | 22 | 34.298 | 6.960  | 14.683 |      |
|      | 1.00118.15 |     |     |    |        |        |        | H    |
| ATOM | 275        | N   | ASP | 23 | 36.926 | 7.867  | 16.215 | 1.00 |
|      | 44.68      |     | N   |    |        |        |        |      |
| ATOM | 276        | CA  | ASP | 23 | 37.931 | 7.466  | 17.192 | 1.00 |
|      | 43.33      |     | C   |    |        |        |        |      |
| ATOM | 277        | C   | ASP | 23 | 37.287 | 6.571  | 18.241 | 1.00 |
|      | 37.55      |     | C   |    |        |        |        |      |
| ATOM | 278        | O   | ASP | 23 | 37.850 | 5.553  | 18.643 | 1.00 |
|      | 61.37      |     | O   |    |        |        |        |      |
| ATOM | 279        | CB  | ASP | 23 | 38.533 | 8.703  | 17.863 | 1.00 |
|      | 40.74      |     | C   |    |        |        |        |      |
| ATOM | 280        | CG  | ASP | 23 | 39.624 | 8.289  | 18.844 |      |
|      | 1.00141.86 |     |     |    |        |        |        | C    |
| ATOM | 281        | OD1 | ASP | 23 | 40.299 | 9.168  | 19.353 |      |
|      | 1.00328.18 |     |     |    |        |        |        | O    |
| ATOM | 282        | OD2 | ASP | 23 | 39.769 | 7.099  | 19.072 |      |
|      | 1.00304.58 |     |     |    |        |        |        | O1-  |
| ATOM | 283        | HN  | ASP | 23 | 36.724 | 8.818  | 16.089 | 1.00 |
|      | 40.86      |     | H   |    |        |        |        |      |
| ATOM | 284        | HA  | ASP | 23 | 38.714 | 6.920  | 16.691 | 1.00 |
|      | 72.12      |     | H   |    |        |        |        |      |
| ATOM | 285        | HB1 | ASP | 23 | 37.757 | 9.235  | 18.395 | 1.00 |
|      | 94.15      |     | H   |    |        |        |        |      |
| ATOM | 286        | HB2 | ASP | 23 | 38.956 | 9.349  | 17.109 | 1.00 |
|      | 93.26      |     | H   |    |        |        |        |      |
| ATOM | 287        | N   | MET | 24 | 36.089 | 6.960  | 18.661 | 1.00 |
|      | 23.24      |     | N   |    |        |        |        |      |
| ATOM | 288        | CA  | MET | 24 | 35.328 | 6.201  | 19.650 | 1.00 |
|      | 32.50      |     | C   |    |        |        |        |      |
| ATOM | 289        | C   | MET | 24 | 33.849 | 6.247  | 19.290 | 1.00 |
|      | 25.13      |     | C   |    |        |        |        |      |
| ATOM | 290        | O   | MET | 24 | 33.189 | 7.268  | 19.483 | 1.00 |
|      | 54.40      |     | O   |    |        |        |        |      |
| ATOM | 291        | CB  | MET | 24 | 35.542 | 6.795  | 21.044 | 1.00 |
|      | 47.36      |     | C   |    |        |        |        |      |

|            |     |      |     |    |        |       |        |      |
|------------|-----|------|-----|----|--------|-------|--------|------|
| ATOM       | 292 | CG   | MET | 24 | 34.742 | 5.992 | 22.073 |      |
| 1.00151.73 |     |      |     |    |        |       |        | C    |
| ATOM       | 293 | SD   | MET | 24 | 35.146 | 6.574 | 23.740 |      |
| 1.00209.23 |     |      |     |    |        |       |        | S    |
| ATOM       | 294 | CE   | MET | 24 | 34.346 | 8.197 | 23.633 |      |
| 1.00243.29 |     |      |     |    |        |       |        | C    |
| ATOM       | 295 | HN   | MET | 24 | 35.698 | 7.775 | 18.285 | 1.00 |
| 17.32      |     |      | H   |    |        |       |        |      |
| ATOM       | 296 | HA   | MET | 24 | 35.658 | 5.170 | 19.650 | 1.00 |
| 48.94      |     |      | H   |    |        |       |        |      |
| ATOM       | 297 | HB1  | MET | 24 | 35.207 | 7.820 | 21.051 |      |
| 1.00124.40 |     |      |     |    |        |       |        | H    |
| ATOM       | 298 | HB2  | MET | 24 | 36.592 | 6.757 | 21.294 |      |
| 1.00166.96 |     |      |     |    |        |       |        | H    |
| ATOM       | 299 | HG1  | MET | 24 | 34.995 | 4.946 | 21.986 |      |
| 1.00331.71 |     |      |     |    |        |       |        | H    |
| ATOM       | 300 | HG2  | MET | 24 | 33.687 | 6.123 | 21.891 |      |
| 1.00302.30 |     |      |     |    |        |       |        | H    |
| ATOM       | 301 | HE1  | MET | 24 | 35.005 | 8.887 | 23.126 |      |
| 1.00340.44 |     |      |     |    |        |       |        | H    |
| ATOM       | 302 | HE2  | MET | 24 | 34.142 | 8.563 | 24.626 |      |
| 1.00373.88 |     |      |     |    |        |       |        | H    |
| ATOM       | 303 | HE3  | MET | 24 | 33.419 | 8.106 | 23.087 |      |
| 1.00386.81 |     |      |     |    |        |       |        | H    |
| ATOM       | 304 | N    | VAL | 25 | 33.333 | 5.146 | 18.755 | 1.00 |
| 22.44      |     |      | N   |    |        |       |        |      |
| ATOM       | 305 | CA   | VAL | 25 | 31.930 | 5.099 | 18.362 | 1.00 |
| 15.37      |     |      | C   |    |        |       |        |      |
| ATOM       | 306 | C    | VAL | 25 | 31.021 | 5.169 | 19.580 | 1.00 |
| 17.47      |     |      | C   |    |        |       |        |      |
| ATOM       | 307 | O    | VAL | 25 | 31.360 | 4.680 | 20.658 | 1.00 |
| 29.52      |     |      | O   |    |        |       |        |      |
| ATOM       | 308 | CB   | VAL | 25 | 31.623 | 3.830 | 17.565 | 1.00 |
| 23.36      |     |      | C   |    |        |       |        |      |
| ATOM       | 309 | CG1  | VAL | 25 | 30.125 | 3.794 | 17.238 | 1.00 |
| 58.39      |     |      | C   |    |        |       |        |      |
| ATOM       | 310 | CG2  | VAL | 25 | 32.431 | 3.836 | 16.266 | 1.00 |
| 55.25      |     |      | C   |    |        |       |        |      |
| ATOM       | 311 | HN   | VAL | 25 | 33.903 | 4.363 | 18.612 | 1.00 |
| 48.11      |     |      | H   |    |        |       |        |      |
| ATOM       | 312 | HA   | VAL | 25 | 31.724 | 5.953 | 17.733 | 1.00 |
| 9.25       |     |      | H   |    |        |       |        |      |
| ATOM       | 313 | HB   | VAL | 25 | 31.884 | 2.962 | 18.155 | 1.00 |
| 52.45      |     |      | H   |    |        |       |        |      |
| ATOM       | 314 | HG11 | VAL | 25 | 29.574 | 3.474 | 18.109 |      |
| 1.00171.07 |     |      |     |    |        |       |        | H    |
| ATOM       | 315 | HG12 | VAL | 25 | 29.946 | 3.105 | 16.426 |      |
| 1.00166.22 |     |      |     |    |        |       |        | H    |
| ATOM       | 316 | HG13 | VAL | 25 | 29.793 | 4.785 | 16.950 |      |
| 1.00134.76 |     |      |     |    |        |       |        | H    |
| ATOM       | 317 | HG21 | VAL | 25 | 33.465 | 4.058 | 16.484 |      |
| 1.00141.88 |     |      |     |    |        |       |        | H    |

|            |     |      |     |    |        |        |        |      |
|------------|-----|------|-----|----|--------|--------|--------|------|
| ATOM       | 318 | HG22 | VAL | 25 | 32.034 | 4.588  | 15.599 |      |
| 1.00184.50 |     |      |     |    |        |        |        | H    |
| ATOM       | 319 | HG23 | VAL | 25 | 32.362 | 2.866  | 15.795 |      |
| 1.00133.90 |     |      |     |    |        |        |        | H    |
| ATOM       | 320 | N    | THR | 26 | 29.865 | 5.797  | 19.392 | 1.00 |
| 13.60      |     |      | N   |    |        |        |        |      |
| ATOM       | 321 | CA   | THR | 26 | 28.884 | 5.964  | 20.464 | 1.00 |
| 21.19      |     |      | C   |    |        |        |        |      |
| ATOM       | 322 | C    | THR | 26 | 27.520 | 5.421  | 20.045 | 1.00 |
| 16.55      |     |      | C   |    |        |        |        |      |
| ATOM       | 323 | O    | THR | 26 | 27.048 | 5.682  | 18.939 | 1.00 |
| 11.43      |     |      | O   |    |        |        |        |      |
| ATOM       | 324 | CB   | THR | 26 | 28.771 | 7.449  | 20.792 | 1.00 |
| 27.07      |     |      | C   |    |        |        |        |      |
| ATOM       | 325 | CG2  | THR | 26 | 27.691 | 7.673  | 21.856 | 1.00 |
| 44.39      |     |      | C   |    |        |        |        |      |
| ATOM       | 326 | OG1  | THR | 26 | 30.021 | 7.911  | 21.281 | 1.00 |
| 34.75      |     |      | O   |    |        |        |        |      |
| ATOM       | 327 | HN   | THR | 26 | 29.666 | 6.170  | 18.507 | 1.00 |
| 10.81      |     |      | H   |    |        |        |        |      |
| ATOM       | 328 | HA   | THR | 26 | 29.215 | 5.437  | 21.348 | 1.00 |
| 33.16      |     |      | H   |    |        |        |        |      |
| ATOM       | 329 | HB   | THR | 26 | 28.514 | 7.990  | 19.890 | 1.00 |
| 20.60      |     |      | H   |    |        |        |        |      |
| ATOM       | 330 | HG1  | THR | 26 | 30.715 | 7.411  | 20.842 | 1.00 |
| 77.72      |     |      | H   |    |        |        |        |      |
| ATOM       | 331 | HG21 | THR | 26 | 27.872 | 7.016  | 22.694 |      |
| 1.00126.99 |     |      |     |    |        |        |        | H    |
| ATOM       | 332 | HG22 | THR | 26 | 26.720 | 7.464  | 21.438 |      |
| 1.00108.32 |     |      |     |    |        |        |        | H    |
| ATOM       | 333 | HG23 | THR | 26 | 27.725 | 8.700  | 22.190 |      |
| 1.00151.99 |     |      |     |    |        |        |        | H    |
| ATOM       | 334 | N    | ARG | 27 | 26.890 | 4.665  | 20.945 | 1.00 |
| 22.38      |     |      | N   |    |        |        |        |      |
| ATOM       | 335 | CA   | ARG | 27 | 25.571 | 4.080  | 20.683 | 1.00 |
| 20.21      |     |      | C   |    |        |        |        |      |
| ATOM       | 336 | C    | ARG | 27 | 24.627 | 4.388  | 21.841 | 1.00 |
| 16.96      |     |      | C   |    |        |        |        |      |
| ATOM       | 337 | O    | ARG | 27 | 25.054 | 4.455  | 22.994 | 1.00 |
| 20.06      |     |      | O   |    |        |        |        |      |
| ATOM       | 338 | CB   | ARG | 27 | 25.703 | 2.564  | 20.527 | 1.00 |
| 22.14      |     |      | C   |    |        |        |        |      |
| ATOM       | 339 | CG   | ARG | 27 | 26.589 | 2.247  | 19.320 |      |
| 1.00124.30 |     |      |     |    |        |        |        | C    |
| ATOM       | 340 | CD   | ARG | 27 | 26.818 | 0.738  | 19.238 |      |
| 1.00109.38 |     |      |     |    |        |        |        | C    |
| ATOM       | 341 | NE   | ARG | 27 | 27.709 | 0.420  | 18.130 |      |
| 1.00227.73 |     |      |     |    |        |        |        | N    |
| ATOM       | 342 | CZ   | ARG | 27 | 28.129 | -0.824 | 17.921 |      |
| 1.00426.12 |     |      |     |    |        |        |        | C    |
| ATOM       | 343 | NH1  | ARG | 27 | 28.928 | -1.085 | 16.922 |      |
| 1.00767.09 |     |      |     |    |        |        |        | N1+  |

|            |     |      |     |    |        |        |        |      |
|------------|-----|------|-----|----|--------|--------|--------|------|
| ATOM       | 344 | NH2  | ARG | 27 | 27.745 | -1.784 | 18.716 |      |
| 1.00581.78 |     |      |     |    |        |        |        | N    |
| ATOM       | 345 | HN   | ARG | 27 | 27.320 | 4.498  | 21.811 | 1.00 |
| 30.75      |     | H    |     |    |        |        |        |      |
| ATOM       | 346 | HA   | ARG | 27 | 25.161 | 4.494  | 19.773 | 1.00 |
| 23.13      |     | H    |     |    |        |        |        |      |
| ATOM       | 347 | HB1  | ARG | 27 | 24.726 | 2.131  | 20.376 | 1.00 |
| 87.46      |     | H    |     |    |        |        |        |      |
| ATOM       | 348 | HB2  | ARG | 27 | 26.148 | 2.149  | 21.419 |      |
| 1.00103.36 |     |      |     |    |        |        |        | H    |
| ATOM       | 349 | HG1  | ARG | 27 | 27.539 | 2.749  | 19.430 |      |
| 1.00281.97 |     |      |     |    |        |        |        | H    |
| ATOM       | 350 | HG2  | ARG | 27 | 26.103 | 2.589  | 18.418 |      |
| 1.00276.19 |     |      |     |    |        |        |        | H    |
| ATOM       | 351 | HD1  | ARG | 27 | 25.870 | 0.242  | 19.092 |      |
| 1.00183.60 |     |      |     |    |        |        |        | H    |
| ATOM       | 352 | HD2  | ARG | 27 | 27.261 | 0.393  | 20.161 |      |
| 1.00142.93 |     |      |     |    |        |        |        | H    |
| ATOM       | 353 | HE   | ARG | 27 | 28.004 | 1.135  | 17.528 |      |
| 1.00372.53 |     |      |     |    |        |        |        | H    |
| ATOM       | 354 | HH11 | ARG | 27 | 29.223 | -0.348 | 16.313 |      |
| 1.00910.59 |     |      |     |    |        |        |        | H    |
| ATOM       | 355 | HH12 | ARG | 27 | 29.244 | -2.020 | 16.766 |      |
| 1.00999.99 |     |      |     |    |        |        |        | H    |
| ATOM       | 356 | HH21 | ARG | 27 | 27.134 | -1.585 | 19.482 |      |
| 1.00532.54 |     |      |     |    |        |        |        | H    |
| ATOM       | 357 | HH22 | ARG | 27 | 28.060 | -2.719 | 18.559 |      |
| 1.00948.84 |     |      |     |    |        |        |        | H    |
| ATOM       | 358 | N    | SER | 28 | 23.340 | 4.576  | 21.536 | 1.00 |
| 14.60      |     |      | N   |    |        |        |        |      |
| ATOM       | 359 | CA   | SER | 28 | 22.349 | 4.878  | 22.573 | 1.00 |
| 14.92      |     |      | C   |    |        |        |        |      |
| ATOM       | 360 | C    | SER | 28 | 21.100 | 4.027  | 22.386 | 1.00 |
| 12.12      |     |      | C   |    |        |        |        |      |
| ATOM       | 361 | O    | SER | 28 | 20.700 | 3.732  | 21.261 | 1.00 |
| 13.41      |     |      | O   |    |        |        |        |      |
| ATOM       | 362 | CB   | SER | 28 | 21.972 | 6.358  | 22.518 | 1.00 |
| 23.26      |     |      | C   |    |        |        |        |      |
| ATOM       | 363 | OG   | SER | 28 | 23.124 | 7.147  | 22.780 |      |
| 1.00146.32 |     |      |     |    |        |        |        | O    |
| ATOM       | 364 | HN   | SER | 28 | 23.049 | 4.512  | 20.600 | 1.00 |
| 15.23      |     |      | H   |    |        |        |        |      |
| ATOM       | 365 | HA   | SER | 28 | 22.769 | 4.665  | 23.549 | 1.00 |
| 15.44      |     |      | H   |    |        |        |        |      |
| ATOM       | 366 | HB1  | SER | 28 | 21.206 | 6.561  | 23.255 | 1.00 |
| 88.73      |     |      | H   |    |        |        |        |      |
| ATOM       | 367 | HB2  | SER | 28 | 21.595 | 6.598  | 21.537 |      |
| 1.00124.68 |     |      |     |    |        |        |        | H    |
| ATOM       | 368 | HG   | SER | 28 | 23.897 | 6.591  | 22.663 |      |
| 1.00242.47 |     |      |     |    |        |        |        | H    |
| ATOM       | 369 | N    | CYS | 29 | 20.483 | 3.643  | 23.500 | 1.00 |
| 10.48      |     |      | N   |    |        |        |        |      |

|            |     |     |     |    |        |       |        |      |
|------------|-----|-----|-----|----|--------|-------|--------|------|
| ATOM       | 370 | CA  | CYS | 29 | 19.272 | 2.833 | 23.452 | 1.00 |
| 9.97       |     |     | C   |    |        |       |        |      |
| ATOM       | 371 | C   | CYS | 29 | 18.684 | 2.690 | 24.853 | 1.00 |
| 11.60      |     |     | C   |    |        |       |        |      |
| ATOM       | 372 | O   | CYS | 29 | 19.310 | 2.115 | 25.743 | 1.00 |
| 15.64      |     |     | O   |    |        |       |        |      |
| ATOM       | 373 | CB  | CYS | 29 | 19.583 | 1.448 | 22.856 | 1.00 |
| 9.52       |     |     | C   |    |        |       |        |      |
| ATOM       | 374 | SG  | CYS | 29 | 18.151 | 0.843 | 21.946 | 1.00 |
| 10.40      |     |     | S   |    |        |       |        |      |
| ATOM       | 375 | HN  | CYS | 29 | 20.844 | 3.917 | 24.368 | 1.00 |
| 11.10      |     |     | H   |    |        |       |        |      |
| ATOM       | 376 | HA  | CYS | 29 | 18.552 | 3.333 | 22.822 | 1.00 |
| 11.08      |     |     | H   |    |        |       |        |      |
| ATOM       | 377 | HB1 | CYS | 29 | 19.813 | 0.743 | 23.646 | 1.00 |
| 9.33       |     |     | H   |    |        |       |        |      |
| ATOM       | 378 | HB2 | CYS | 29 | 20.423 | 1.518 | 22.186 | 1.00 |
| 10.78      |     |     | H   |    |        |       |        |      |
| ATOM       | 379 | N   | GLU | 30 | 17.482 | 3.223 | 25.045 | 1.00 |
| 13.52      |     |     | N   |    |        |       |        |      |
| ATOM       | 380 | CA  | GLU | 30 | 16.826 | 3.152 | 26.345 | 1.00 |
| 17.41      |     |     | C   |    |        |       |        |      |
| ATOM       | 381 | C   | GLU | 30 | 16.178 | 1.789 | 26.552 | 1.00 |
| 10.81      |     |     | C   |    |        |       |        |      |
| ATOM       | 382 | O   | GLU | 30 | 15.811 | 1.112 | 25.592 | 1.00 |
| 23.22      |     |     | O   |    |        |       |        |      |
| ATOM       | 383 | CB  | GLU | 30 | 15.764 | 4.247 | 26.451 | 1.00 |
| 37.83      |     |     | C   |    |        |       |        |      |
| ATOM       | 384 | CG  | GLU | 30 | 16.433 | 5.614 | 26.303 |      |
| 1.00108.13 |     |     | C   |    |        |       |        |      |
| ATOM       | 385 | CD  | GLU | 30 | 17.329 | 5.887 | 27.504 |      |
| 1.00240.52 |     |     | C   |    |        |       |        |      |
| ATOM       | 386 | OE1 | GLU | 30 | 17.151 | 5.227 | 28.516 |      |
| 1.00422.56 |     |     | O   |    |        |       |        |      |
| ATOM       | 387 | OE2 | GLU | 30 | 18.182 | 6.754 | 27.398 |      |
| 1.00410.81 |     |     | O1- |    |        |       |        |      |
| ATOM       | 388 | HN  | GLU | 30 | 17.028 | 3.673 | 24.300 | 1.00 |
| 15.61      |     |     | H   |    |        |       |        |      |
| ATOM       | 389 | HA  | GLU | 30 | 17.562 | 3.310 | 27.118 | 1.00 |
| 24.60      |     |     | H   |    |        |       |        |      |
| ATOM       | 390 | HB1 | GLU | 30 | 15.279 | 4.188 | 27.414 | 1.00 |
| 72.67      |     |     | H   |    |        |       |        |      |
| ATOM       | 391 | HB2 | GLU | 30 | 15.032 | 4.117 | 25.668 | 1.00 |
| 56.47      |     |     | H   |    |        |       |        |      |
| ATOM       | 392 | HG1 | GLU | 30 | 15.674 | 6.378 | 26.241 |      |
| 1.00196.66 |     |     | H   |    |        |       |        |      |
| ATOM       | 393 | HG2 | GLU | 30 | 17.027 | 5.624 | 25.401 |      |
| 1.00140.67 |     |     | H   |    |        |       |        |      |
| ATOM       | 394 | N   | LYS | 31 | 16.038 | 1.394 | 27.816 | 1.00 |
| 11.96      |     |     | N   |    |        |       |        |      |
| ATOM       | 395 | CA  | LYS | 31 | 15.429 | 0.107 | 28.160 | 1.00 |
| 11.40      |     |     | C   |    |        |       |        |      |



|            |     |     |     |    |        |        |        |      |
|------------|-----|-----|-----|----|--------|--------|--------|------|
| ATOM       | 396 | C   | LYS | 31 | 14.144 | 0.332  | 28.949 | 1.00 |
| 10.99      |     |     | C   |    |        |        |        |      |
| ATOM       | 397 | O   | LYS | 31 | 14.061 | 1.246  | 29.769 | 1.00 |
| 12.86      |     |     | O   |    |        |        |        |      |
| ATOM       | 398 | CB  | LYS | 31 | 16.402 | -0.721 | 29.003 | 1.00 |
| 21.40      |     |     | C   |    |        |        |        |      |
| ATOM       | 399 | CG  | LYS | 31 | 17.661 | -1.015 | 28.186 | 1.00 |
| 57.81      |     |     | C   |    |        |        |        |      |
| ATOM       | 400 | CD  | LYS | 31 | 18.634 | -1.842 | 29.027 |      |
| 1.00115.52 |     |     | C   |    |        |        |        |      |
| ATOM       | 401 | CE  | LYS | 31 | 19.898 | -2.130 | 28.213 |      |
| 1.00250.23 |     |     | C   |    |        |        |        |      |
| ATOM       | 402 | NZ  | LYS | 31 | 20.849 | -2.928 | 29.037 |      |
| 1.00462.10 |     |     | N1+ |    |        |        |        |      |
| ATOM       | 403 | HN  | LYS | 31 | 16.350 | 1.980  | 28.536 | 1.00 |
| 26.13      |     |     | H   |    |        |        |        |      |
| ATOM       | 404 | HA  | LYS | 31 | 15.195 | -0.441 | 27.257 | 1.00 |
| 13.87      |     |     | H   |    |        |        |        |      |
| ATOM       | 405 | HB1 | LYS | 31 | 15.932 | -1.651 | 29.284 | 1.00 |
| 37.63      |     |     | H   |    |        |        |        |      |
| ATOM       | 406 | HB2 | LYS | 31 | 16.666 | -0.167 | 29.891 | 1.00 |
| 47.19      |     |     | H   |    |        |        |        |      |
| ATOM       | 407 | HG1 | LYS | 31 | 18.134 | -0.086 | 27.903 |      |
| 1.00126.32 |     |     | H   |    |        |        |        |      |
| ATOM       | 408 | HG2 | LYS | 31 | 17.392 | -1.568 | 27.296 |      |
| 1.00114.19 |     |     | H   |    |        |        |        |      |
| ATOM       | 409 | HD1 | LYS | 31 | 18.168 | -2.777 | 29.304 |      |
| 1.00198.45 |     |     | H   |    |        |        |        |      |
| ATOM       | 410 | HD2 | LYS | 31 | 18.897 | -1.293 | 29.919 |      |
| 1.00200.14 |     |     | H   |    |        |        |        |      |
| ATOM       | 411 | HE1 | LYS | 31 | 20.363 | -1.196 | 27.930 |      |
| 1.00374.64 |     |     | H   |    |        |        |        |      |
| ATOM       | 412 | HE2 | LYS | 31 | 19.636 | -2.686 | 27.325 |      |
| 1.00403.27 |     |     | H   |    |        |        |        |      |
| ATOM       | 413 | HZ1 | LYS | 31 | 21.740 | -2.404 | 29.144 |      |
| 1.00627.38 |     |     | H   |    |        |        |        |      |
| ATOM       | 414 | HZ2 | LYS | 31 | 21.035 | -3.838 | 28.568 |      |
| 1.00622.26 |     |     | H   |    |        |        |        |      |
| ATOM       | 415 | HZ3 | LYS | 31 | 20.436 | -3.099 | 29.975 |      |
| 1.00619.20 |     |     | H   |    |        |        |        |      |
| ATOM       | 416 | N   | THR | 32 | 13.145 | -0.503 | 28.694 | 1.00 |
| 15.51      |     |     | N   |    |        |        |        |      |
| ATOM       | 417 | CA  | THR | 32 | 11.870 | -0.380 | 29.385 | 1.00 |
| 22.44      |     |     | C   |    |        |        |        |      |
| ATOM       | 418 | C   | THR | 32 | 12.030 | -0.729 | 30.860 | 1.00 |
| 26.60      |     |     | C   |    |        |        |        |      |
| ATOM       | 419 | O   | THR | 32 | 12.530 | -1.798 | 31.209 | 1.00 |
| 57.43      |     |     | O   |    |        |        |        |      |
| ATOM       | 420 | CB  | THR | 32 | 10.835 | -1.305 | 28.737 | 1.00 |
| 56.28      |     |     | C   |    |        |        |        |      |
| ATOM       | 421 | CG2 | THR | 32 | 9.484  | -1.139 | 29.435 |      |
| 1.00102.70 |     |     | C   |    |        |        |        |      |

|            |     |      |     |    |        |        |        |      |
|------------|-----|------|-----|----|--------|--------|--------|------|
| ATOM       | 422 | OG1  | THR | 32 | 10.700 | -0.970 | 27.363 |      |
| 1.00111.17 |     |      |     |    |        |        |        | O    |
| ATOM       | 423 | HN   | THR | 32 | 13.268 | -1.210 | 28.029 | 1.00 |
| 18.79      |     |      | H   |    |        |        |        |      |
| ATOM       | 424 | HA   | THR | 32 | 11.524 | 0.639  | 29.304 | 1.00 |
| 19.67      |     |      | H   |    |        |        |        |      |
| ATOM       | 425 | HB   | THR | 32 | 11.158 | -2.328 | 28.829 | 1.00 |
| 84.25      |     |      | H   |    |        |        |        |      |
| ATOM       | 426 | HG1  | THR | 32 | 11.578 | -0.932 | 26.979 |      |
| 1.00205.03 |     |      |     |    |        |        |        | H    |
| ATOM       | 427 | HG21 | THR | 32 | 9.566  | -1.454 | 30.464 |      |
| 1.00220.71 |     |      |     |    |        |        |        | H    |
| ATOM       | 428 | HG22 | THR | 32 | 8.744  | -1.745 | 28.932 |      |
| 1.00174.67 |     |      |     |    |        |        |        | H    |
| ATOM       | 429 | HG23 | THR | 32 | 9.186  | -0.101 | 29.398 |      |
| 1.00217.44 |     |      |     |    |        |        |        | H    |
| ATOM       | 430 | N    | THR | 33 | 11.597 | 0.186  | 31.722 | 1.00 |
| 22.47      |     |      | N   |    |        |        |        |      |
| ATOM       | 431 | CA   | THR | 33 | 11.687 | -0.017 | 33.165 | 1.00 |
| 41.60      |     |      | C   |    |        |        |        |      |
| ATOM       | 432 | C    | THR | 33 | 10.588 | 0.727  | 33.872 | 1.00 |
| 38.03      |     |      | C   |    |        |        |        |      |
| ATOM       | 433 | O    | THR | 33 | 10.756 | 1.873  | 34.290 | 1.00 |
| 52.73      |     |      | O   |    |        |        |        |      |
| ATOM       | 434 | CB   | THR | 33 | 13.047 | 0.450  | 33.687 | 1.00 |
| 63.25      |     |      | C   |    |        |        |        |      |
| ATOM       | 435 | CG2  | THR | 33 | 14.144 | -0.487 | 33.179 |      |
| 1.00121.65 |     |      |     |    |        |        |        | C    |
| ATOM       | 436 | OG1  | THR | 33 | 13.301 | 1.771  | 33.232 | 1.00 |
| 96.20      |     |      | O   |    |        |        |        |      |
| ATOM       | 437 | HN   | THR | 33 | 11.207 | 1.017  | 31.377 | 1.00 |
| 23.82      |     |      | H   |    |        |        |        |      |
| ATOM       | 438 | HA   | THR | 33 | 11.560 | -1.057 | 33.393 | 1.00 |
| 67.12      |     |      | H   |    |        |        |        |      |
| ATOM       | 439 | HB   | THR | 33 | 13.039 | 0.435  | 34.765 |      |
| 1.00107.59 |     |      |     |    |        |        |        | H    |
| ATOM       | 440 | HG1  | THR | 33 | 13.865 | 2.204  | 33.877 |      |
| 1.00176.27 |     |      |     |    |        |        |        | H    |
| ATOM       | 441 | HG21 | THR | 33 | 13.857 | -1.512 | 33.363 |      |
| 1.00255.23 |     |      |     |    |        |        |        | H    |
| ATOM       | 442 | HG22 | THR | 33 | 15.067 | -0.274 | 33.697 |      |
| 1.00245.37 |     |      |     |    |        |        |        | H    |
| ATOM       | 443 | HG23 | THR | 33 | 14.282 | -0.337 | 32.119 |      |
| 1.00185.78 |     |      |     |    |        |        |        | H    |
| ATOM       | 444 | N    | GLY | 34 | 9.465  | 0.049  | 34.021 | 1.00 |
| 40.93      |     |      | N   |    |        |        |        |      |
| ATOM       | 445 | CA   | GLY | 34 | 8.339  | 0.638  | 34.701 | 1.00 |
| 45.59      |     |      | C   |    |        |        |        |      |
| ATOM       | 446 | C    | GLY | 34 | 7.680  | 1.709  | 33.839 | 1.00 |
| 40.97      |     |      | C   |    |        |        |        |      |
| ATOM       | 447 | O    | GLY | 34 | 6.460  | 1.729  | 33.681 | 1.00 |
| 82.17      |     |      | O   |    |        |        |        |      |

|            |     |      |     |    |        |        |        |      |
|------------|-----|------|-----|----|--------|--------|--------|------|
| ATOM       | 448 | HN   | GLY | 34 | 9.402  | -0.866 | 33.679 | 1.00 |
| 54.00      |     |      | H   |    |        |        |        |      |
| ATOM       | 449 | HA1  | GLY | 34 | 8.701  | 1.079  | 35.609 | 1.00 |
| 54.41      |     |      | H   |    |        |        |        |      |
| ATOM       | 450 | HA2  | GLY | 34 | 7.619  | -0.133 | 34.936 | 1.00 |
| 62.09      |     |      | H   |    |        |        |        |      |
| ATOM       | 451 | N    | ASN | 35 | 8.502  | 2.597  | 33.278 | 1.00 |
| 32.51      |     |      | N   |    |        |        |        |      |
| ATOM       | 452 | CA   | ASN | 35 | 8.003  | 3.674  | 32.419 | 1.00 |
| 33.20      |     |      | C   |    |        |        |        |      |
| ATOM       | 453 | C    | ASN | 35 | 8.843  | 3.765  | 31.148 | 1.00 |
| 23.17      |     |      | C   |    |        |        |        |      |
| ATOM       | 454 | O    | ASN | 35 | 10.067 | 3.642  | 31.193 | 1.00 |
| 27.01      |     |      | O   |    |        |        |        |      |
| ATOM       | 455 | CB   | ASN | 35 | 8.064  | 5.007  | 33.166 | 1.00 |
| 54.51      |     |      | C   |    |        |        |        |      |
| ATOM       | 456 | CG   | ASN | 35 | 7.212  | 4.937  | 34.428 | 1.00 |
| 80.73      |     |      | C   |    |        |        |        |      |
| ATOM       | 457 | ND2  | ASN | 35 | 7.670  | 5.437  | 35.543 |      |
| 1.00220.46 |     |      |     |    |        |        |        | N    |
| ATOM       | 458 | OD1  | ASN | 35 | 6.099  | 4.412  | 34.398 |      |
| 1.00117.80 |     |      |     |    |        |        |        | O    |
| ATOM       | 459 | HN   | ASN | 35 | 9.464  | 2.523  | 33.439 | 1.00 |
| 51.15      |     |      | H   |    |        |        |        |      |
| ATOM       | 460 | HA   | ASN | 35 | 6.976  | 3.474  | 32.145 | 1.00 |
| 47.21      |     |      | H   |    |        |        |        |      |
| ATOM       | 461 | HB1  | ASN | 35 | 7.691  | 5.792  | 32.526 | 1.00 |
| 68.31      |     |      | H   |    |        |        |        |      |
| ATOM       | 462 | HB2  | ASN | 35 | 9.088  | 5.219  | 33.436 | 1.00 |
| 57.75      |     |      | H   |    |        |        |        |      |
| ATOM       | 463 | HD21 | ASN | 35 | 8.555  | 5.854  | 35.565 |      |
| 1.00405.39 |     |      |     |    |        |        |        | H    |
| ATOM       | 464 | HD22 | ASN | 35 | 7.127  | 5.396  | 36.358 |      |
| 1.00245.64 |     |      |     |    |        |        |        | H    |
| ATOM       | 465 | N    | PHE | 36 | 8.176  | 3.974  | 30.018 | 1.00 |
| 35.72      |     |      | N   |    |        |        |        |      |
| ATOM       | 466 | CA   | PHE | 36 | 8.861  | 4.073  | 28.739 | 1.00 |
| 33.41      |     |      | C   |    |        |        |        |      |
| ATOM       | 467 | C    | PHE | 36 | 9.397  | 5.488  | 28.525 | 1.00 |
| 28.51      |     |      | C   |    |        |        |        |      |
| ATOM       | 468 | O    | PHE | 36 | 8.786  | 6.464  | 28.958 | 1.00 |
| 45.23      |     |      | O   |    |        |        |        |      |
| ATOM       | 469 | CB   | PHE | 36 | 7.882  | 3.722  | 27.623 | 1.00 |
| 67.53      |     |      | C   |    |        |        |        |      |
| ATOM       | 470 | CG   | PHE | 36 | 7.479  | 2.271  | 27.745 | 1.00 |
| 86.71      |     |      | C   |    |        |        |        |      |
| ATOM       | 471 | CD1  | PHE | 36 | 6.382  | 1.919  | 28.541 |      |
| 1.00106.51 |     |      |     |    |        |        |        | C    |
| ATOM       | 472 | CD2  | PHE | 36 | 8.194  | 1.280  | 27.061 | 1.00 |
| 99.48      |     |      | C   |    |        |        |        |      |
| ATOM       | 473 | CE1  | PHE | 36 | 6.000  | 0.578  | 28.654 |      |
| 1.00134.48 |     |      |     |    |        |        |        | C    |

|      |            |      |     |    |        |        |        |      |
|------|------------|------|-----|----|--------|--------|--------|------|
| ATOM | 474        | CE2  | PHE | 36 | 7.813  | -0.061 | 27.174 |      |
|      | 1.00134.27 |      |     |    |        |        |        | C    |
| ATOM | 475        | CZ   | PHE | 36 | 6.716  | -0.413 | 27.971 |      |
|      | 1.00149.48 |      |     |    |        |        |        | C    |
| ATOM | 476        | HN   | PHE | 36 | 7.203  | 4.058  | 30.040 | 1.00 |
|      | 62.87      |      | H   |    |        |        |        |      |
| ATOM | 477        | HA   | PHE | 36 | 9.683  | 3.374  | 28.718 | 1.00 |
|      | 28.53      |      | H   |    |        |        |        |      |
| ATOM | 478        | HB1  | PHE | 36 | 8.354  | 3.884  | 26.672 | 1.00 |
|      | 73.56      |      | H   |    |        |        |        |      |
| ATOM | 479        | HB2  | PHE | 36 | 7.006  | 4.346  | 27.702 | 1.00 |
|      | 88.42      |      | H   |    |        |        |        |      |
| ATOM | 480        | HD1  | PHE | 36 | 5.832  | 2.685  | 29.069 |      |
|      | 1.00110.20 |      |     |    |        |        |        | H    |
| ATOM | 481        | HD2  | PHE | 36 | 9.042  | 1.550  | 26.449 | 1.00 |
|      | 93.07      |      | H   |    |        |        |        |      |
| ATOM | 482        | HE1  | PHE | 36 | 5.155  | 0.307  | 29.268 |      |
|      | 1.00155.06 |      |     |    |        |        |        | H    |
| ATOM | 483        | HE2  | PHE | 36 | 8.364  | -0.825 | 26.647 |      |
|      | 1.00159.46 |      |     |    |        |        |        | H    |
| ATOM | 484        | HZ   | PHE | 36 | 6.421  | -1.448 | 28.057 |      |
|      | 1.00183.25 |      |     |    |        |        |        | H    |
| ATOM | 485        | N    | THR | 37 | 10.543 | 5.589  | 27.850 | 1.00 |
|      | 20.06      |      | N   |    |        |        |        |      |
| ATOM | 486        | CA   | THR | 37 | 11.162 | 6.885  | 27.576 | 1.00 |
|      | 27.18      |      | C   |    |        |        |        |      |
| ATOM | 487        | C    | THR | 37 | 11.588 | 6.964  | 26.115 | 1.00 |
|      | 41.87      |      | C   |    |        |        |        |      |
| ATOM | 488        | O    | THR | 37 | 10.918 | 6.429  | 25.232 |      |
|      | 1.00169.86 |      |     |    |        |        |        | O    |
| ATOM | 489        | CB   | THR | 37 | 12.383 | 7.081  | 28.478 | 1.00 |
|      | 26.52      |      | C   |    |        |        |        |      |
| ATOM | 490        | CG2  | THR | 37 | 11.987 | 6.832  | 29.933 | 1.00 |
|      | 75.69      |      | C   |    |        |        |        |      |
| ATOM | 491        | OG1  | THR | 37 | 13.400 | 6.164  | 28.098 | 1.00 |
|      | 81.95      |      | O   |    |        |        |        |      |
| ATOM | 492        | HN   | THR | 37 | 10.983 | 4.778  | 27.529 | 1.00 |
|      | 18.47      |      | H   |    |        |        |        |      |
| ATOM | 493        | HA   | THR | 37 | 10.452 | 7.677  | 27.775 | 1.00 |
|      | 38.80      |      | H   |    |        |        |        |      |
| ATOM | 494        | HB   | THR | 37 | 12.750 | 8.090  | 28.375 | 1.00 |
|      | 81.60      |      | H   |    |        |        |        |      |
| ATOM | 495        | HG1  | THR | 37 | 13.453 | 6.160  | 27.140 |      |
|      | 1.00188.80 |      |     |    |        |        |        | H    |
| ATOM | 496        | HG21 | THR | 37 | 11.098 | 7.398  | 30.167 |      |
|      | 1.00196.98 |      |     |    |        |        |        | H    |
| ATOM | 497        | HG22 | THR | 37 | 12.792 | 7.143  | 30.584 |      |
|      | 1.00196.23 |      |     |    |        |        |        | H    |
| ATOM | 498        | HG23 | THR | 37 | 11.793 | 5.781  | 30.081 |      |
|      | 1.00168.92 |      |     |    |        |        |        | H    |
| ATOM | 499        | N    | GLU | 38 | 12.704 | 7.637  | 25.870 | 1.00 |
|      | 26.53      |      | N   |    |        |        |        |      |

|            |     |     |     |    |        |        |        |      |
|------------|-----|-----|-----|----|--------|--------|--------|------|
| ATOM       | 500 | CA  | GLU | 38 | 13.219 | 7.787  | 24.512 | 1.00 |
| 30.29      |     |     | C   |    |        |        |        |      |
| ATOM       | 501 | C   | GLU | 38 | 14.712 | 8.102  | 24.532 | 1.00 |
| 25.39      |     |     | C   |    |        |        |        |      |
| ATOM       | 502 | O   | GLU | 38 | 15.244 | 8.575  | 25.536 | 1.00 |
| 51.60      |     |     | O   |    |        |        |        |      |
| ATOM       | 503 | CB  | GLU | 38 | 12.465 | 8.907  | 23.790 | 1.00 |
| 54.82      |     |     | C   |    |        |        |        |      |
| ATOM       | 504 | CG  | GLU | 38 | 12.671 | 10.228 | 24.534 |      |
| 1.00165.84 |     |     | C   |    |        |        |        |      |
| ATOM       | 505 | CD  | GLU | 38 | 11.820 | 11.322 | 23.898 |      |
| 1.00292.92 |     |     | C   |    |        |        |        |      |
| ATOM       | 506 | OE1 | GLU | 38 | 11.872 | 12.441 | 24.380 |      |
| 1.00414.19 |     |     | O   |    |        |        |        |      |
| ATOM       | 507 | OE2 | GLU | 38 | 11.130 | 11.025 | 22.936 |      |
| 1.00537.65 |     |     | O1- |    |        |        |        |      |
| ATOM       | 508 | HN  | GLU | 38 | 13.193 | 8.040  | 26.618 | 1.00 |
| 84.50      |     |     | H   |    |        |        |        |      |
| ATOM       | 509 | HA  | GLU | 38 | 13.065 | 6.863  | 23.975 | 1.00 |
| 32.15      |     |     | H   |    |        |        |        |      |
| ATOM       | 510 | HB1 | GLU | 38 | 11.412 | 8.672  | 23.762 |      |
| 1.00144.82 |     |     | H   |    |        |        |        |      |
| ATOM       | 511 | HB2 | GLU | 38 | 12.841 | 9.000  | 22.780 |      |
| 1.00106.49 |     |     | H   |    |        |        |        |      |
| ATOM       | 512 | HG1 | GLU | 38 | 13.711 | 10.511 | 24.482 |      |
| 1.00303.31 |     |     | H   |    |        |        |        |      |
| ATOM       | 513 | HG2 | GLU | 38 | 12.382 | 10.106 | 25.568 |      |
| 1.00323.99 |     |     | H   |    |        |        |        |      |
| ATOM       | 514 | N   | CYS | 39 | 15.380 | 7.842  | 23.411 | 1.00 |
| 15.84      |     |     | N   |    |        |        |        |      |
| ATOM       | 515 | CA  | CYS | 39 | 16.811 | 8.102  | 23.306 | 1.00 |
| 14.30      |     |     | C   |    |        |        |        |      |
| ATOM       | 516 | C   | CYS | 39 | 17.099 | 9.581  | 23.602 | 1.00 |
| 22.31      |     |     | C   |    |        |        |        |      |
| ATOM       | 517 | O   | CYS | 39 | 16.240 | 10.435 | 23.384 | 1.00 |
| 32.92      |     |     | O   |    |        |        |        |      |
| ATOM       | 518 | CB  | CYS | 39 | 17.292 | 7.736  | 21.897 | 1.00 |
| 18.08      |     |     | C   |    |        |        |        |      |
| ATOM       | 519 | SG  | CYS | 39 | 16.018 | 8.191  | 20.693 | 1.00 |
| 17.41      |     |     | S   |    |        |        |        |      |
| ATOM       | 520 | HN  | CYS | 39 | 14.902 | 7.470  | 22.642 | 1.00 |
| 24.87      |     |     | H   |    |        |        |        |      |
| ATOM       | 521 | HA  | CYS | 39 | 17.326 | 7.484  | 24.023 | 1.00 |
| 14.60      |     |     | H   |    |        |        |        |      |
| ATOM       | 522 | HB1 | CYS | 39 | 17.474 | 6.673  | 21.840 | 1.00 |
| 27.71      |     |     | H   |    |        |        |        |      |
| ATOM       | 523 | HB2 | CYS | 39 | 18.207 | 8.268  | 21.671 | 1.00 |
| 34.91      |     |     | H   |    |        |        |        |      |
| ATOM       | 524 | N   | PRO | 40 | 18.274 | 9.902  | 24.099 | 1.00 |
| 27.27      |     |     | N   |    |        |        |        |      |
| ATOM       | 525 | CA  | PRO | 40 | 18.643 | 11.309 | 24.428 | 1.00 |
| 47.66      |     |     | C   |    |        |        |        |      |

|            |     |     |     |    |        |        |        |      |
|------------|-----|-----|-----|----|--------|--------|--------|------|
| ATOM       | 526 | C   | PRO | 40 | 18.929 | 12.139 | 23.179 | 1.00 |
| 71.54      |     |     | C   |    |        |        |        |      |
| ATOM       | 527 | O   | PRO | 40 | 19.626 | 11.694 | 22.267 | 1.00 |
| 87.70      |     |     | O   |    |        |        |        |      |
| ATOM       | 528 | CB  | PRO | 40 | 19.899 | 11.151 | 25.293 | 1.00 |
| 53.85      |     |     | C   |    |        |        |        |      |
| ATOM       | 529 | CG  | PRO | 40 | 20.534 | 9.894  | 24.798 | 1.00 |
| 46.04      |     |     | C   |    |        |        |        |      |
| ATOM       | 530 | CD  | PRO | 40 | 19.379 | 8.973  | 24.395 | 1.00 |
| 25.70      |     |     | C   |    |        |        |        |      |
| ATOM       | 531 | HA  | PRO | 40 | 17.860 | 11.772 | 25.010 | 1.00 |
| 58.04      |     |     | H   |    |        |        |        |      |
| ATOM       | 532 | HB1 | PRO | 40 | 19.630 | 11.045 | 26.334 | 1.00 |
| 67.93      |     |     | H   |    |        |        |        |      |
| ATOM       | 533 | HB2 | PRO | 40 | 20.565 | 11.996 | 25.160 | 1.00 |
| 70.99      |     |     | H   |    |        |        |        |      |
| ATOM       | 534 | HG1 | PRO | 40 | 21.117 | 9.431  | 25.581 | 1.00 |
| 65.91      |     |     | H   |    |        |        |        |      |
| ATOM       | 535 | HG2 | PRO | 40 | 21.164 | 10.108 | 23.942 | 1.00 |
| 54.99      |     |     | H   |    |        |        |        |      |
| ATOM       | 536 | HD1 | PRO | 40 | 19.111 | 8.320  | 25.211 | 1.00 |
| 24.22      |     |     | H   |    |        |        |        |      |
| ATOM       | 537 | HD2 | PRO | 40 | 19.639 | 8.403  | 23.517 | 1.00 |
| 26.94      |     |     | H   |    |        |        |        |      |
| ATOM       | 538 | N   | GLY | 41 | 18.391 | 13.349 | 23.158 |      |
| 1.00105.24 |     |     | N   |    |        |        |        |      |
| ATOM       | 539 | CA  | GLY | 41 | 18.592 | 14.253 | 22.032 |      |
| 1.00147.55 |     |     | C   |    |        |        |        |      |
| ATOM       | 540 | C   | GLY | 41 | 20.061 | 14.637 | 21.905 |      |
| 1.00161.74 |     |     | C   |    |        |        |        |      |
| ATOM       | 541 | O   | GLY | 41 | 20.594 | 14.742 | 20.801 |      |
| 1.00244.37 |     |     | O   |    |        |        |        |      |
| ATOM       | 542 | HN  | GLY | 41 | 17.852 | 13.642 | 23.920 |      |
| 1.00121.79 |     |     | H   |    |        |        |        |      |
| ATOM       | 543 | HA1 | GLY | 41 | 18.004 | 15.147 | 22.182 |      |
| 1.00184.40 |     |     | H   |    |        |        |        |      |
| ATOM       | 544 | HA2 | GLY | 41 | 18.272 | 13.766 | 21.125 |      |
| 1.00157.34 |     |     | H   |    |        |        |        |      |
| ATOM       | 545 | N   | LEU | 42 | 20.703 | 14.852 | 23.049 |      |
| 1.00162.48 |     |     | N   |    |        |        |        |      |
| ATOM       | 546 | CA  | LEU | 42 | 22.117 | 15.233 | 23.083 |      |
| 1.00191.48 |     |     | C   |    |        |        |        |      |
| ATOM       | 547 | C   | LEU | 42 | 22.977 | 14.040 | 23.488 |      |
| 1.00166.66 |     |     | C   |    |        |        |        |      |
| ATOM       | 548 | O   | LEU | 42 | 22.574 | 13.223 | 24.314 |      |
| 1.00251.38 |     |     | O   |    |        |        |        |      |
| ATOM       | 549 | CB  | LEU | 42 | 22.324 | 16.368 | 24.089 |      |
| 1.00307.99 |     |     | C   |    |        |        |        |      |
| ATOM       | 550 | CG  | LEU | 42 | 21.389 | 17.538 | 23.757 |      |
| 1.00452.28 |     |     | C   |    |        |        |        |      |
| ATOM       | 551 | CD1 | LEU | 42 | 21.586 | 18.648 | 24.794 |      |
| 1.00681.24 |     |     | C   |    |        |        |        |      |

|            |     |      |     |    |        |        |        |
|------------|-----|------|-----|----|--------|--------|--------|
| ATOM       | 552 | CD2  | LEU | 42 | 21.704 | 18.081 | 22.351 |
| 1.00527.46 |     |      | C   |    |        |        |        |
| ATOM       | 553 | HN   | LEU | 42 | 20.215 | 14.755 | 23.893 |
| 1.00195.47 |     |      | H   |    |        |        |        |
| ATOM       | 554 | HA   | LEU | 42 | 22.428 | 15.571 | 22.104 |
| 1.00229.77 |     |      | H   |    |        |        |        |
| ATOM       | 555 | HB1  | LEU | 42 | 23.348 | 16.704 | 24.044 |
| 1.00342.49 |     |      | H   |    |        |        |        |
| ATOM       | 556 | HB2  | LEU | 42 | 22.108 | 16.008 | 25.085 |
| 1.00335.33 |     |      | H   |    |        |        |        |
| ATOM       | 557 | HG   | LEU | 42 | 20.365 | 17.196 | 23.790 |
| 1.00427.79 |     |      | H   |    |        |        |        |
| ATOM       | 558 | HD11 | LEU | 42 | 20.823 | 19.400 | 24.665 |
| 1.00909.71 |     |      | H   |    |        |        |        |
| ATOM       | 559 | HD12 | LEU | 42 | 22.560 | 19.097 | 24.661 |
| 1.00706.80 |     |      | H   |    |        |        |        |
| ATOM       | 560 | HD13 | LEU | 42 | 21.515 | 18.229 | 25.787 |
| 1.00858.82 |     |      | H   |    |        |        |        |
| ATOM       | 561 | HD21 | LEU | 42 | 21.357 | 19.102 | 22.269 |
| 1.00631.69 |     |      | H   |    |        |        |        |
| ATOM       | 562 | HD22 | LEU | 42 | 21.200 | 17.477 | 21.611 |
| 1.00628.06 |     |      | H   |    |        |        |        |
| ATOM       | 563 | HD23 | LEU | 42 | 22.771 | 18.049 | 22.177 |
| 1.00656.75 |     |      | H   |    |        |        |        |
| ATOM       | 564 | N    | THR | 43 | 24.166 | 13.949 | 22.899 |
| 1.00178.52 |     |      | N   |    |        |        |        |
| ATOM       | 565 | CA   | THR | 43 | 25.078 | 12.852 | 23.203 |
| 1.00240.84 |     |      | C   |    |        |        |        |
| ATOM       | 566 | C    | THR | 43 | 25.449 | 12.864 | 24.693 |
| 1.00372.31 |     |      | C   |    |        |        |        |
| ATOM       | 567 | O    | THR | 43 | 25.614 | 13.935 | 25.277 |
| 1.00500.13 |     |      | O   |    |        |        |        |
| ATOM       | 568 | CB   | THR | 43 | 26.347 | 12.988 | 22.358 |
| 1.00354.13 |     |      | C   |    |        |        |        |
| ATOM       | 569 | CG2  | THR | 43 | 27.113 | 14.240 | 22.783 |
| 1.00463.04 |     |      | C   |    |        |        |        |
| ATOM       | 570 | OG1  | THR | 43 | 27.164 | 11.841 | 22.544 |
| 1.00508.50 |     |      | O   |    |        |        |        |
| ATOM       | 571 | HN   | THR | 43 | 24.433 | 14.630 | 22.249 |
| 1.00229.59 |     |      | H   |    |        |        |        |
| ATOM       | 572 | HA   | THR | 43 | 24.590 | 11.927 | 22.953 |
| 1.00249.90 |     |      | H   |    |        |        |        |
| ATOM       | 573 | HB   | THR | 43 | 26.078 | 13.073 | 21.316 |
| 1.00481.58 |     |      | H   |    |        |        |        |
| ATOM       | 574 | HG1  | THR | 43 | 26.880 | 11.169 | 21.918 |
| 1.00624.31 |     |      | H   |    |        |        |        |
| ATOM       | 575 | HG21 | THR | 43 | 27.883 | 14.455 | 22.056 |
| 1.00650.95 |     |      | H   |    |        |        |        |
| ATOM       | 576 | HG22 | THR | 43 | 27.567 | 14.076 | 23.749 |
| 1.00580.73 |     |      | H   |    |        |        |        |
| ATOM       | 577 | HG23 | THR | 43 | 26.432 | 15.077 | 22.843 |
| 1.00571.99 |     |      | H   |    |        |        |        |

|            |     |      |     |    |        |        |        |
|------------|-----|------|-----|----|--------|--------|--------|
| ATOM       | 578 | N    | PRO | 44 | 25.581 | 11.716 | 25.325 |
| 1.00488.39 |     |      |     | N  |        |        |        |
| ATOM       | 579 | CA   | PRO | 44 | 25.938 | 11.642 | 26.774 |
| 1.00760.13 |     |      |     | C  |        |        |        |
| ATOM       | 580 | C    | PRO | 44 | 27.406 | 11.983 | 27.004 |
| 1.00735.36 |     |      |     | C  |        |        |        |
| ATOM       | 581 | O    | PRO | 44 | 27.844 | 12.169 | 28.140 |
| 1.00999.99 |     |      |     | O  |        |        |        |
| ATOM       | 582 | CB   | PRO | 44 | 25.634 | 10.186 | 27.143 |
| 1.00999.99 |     |      |     | C  |        |        |        |
| ATOM       | 583 | CG   | PRO | 44 | 25.855 | 9.428  | 25.876 |
| 1.00856.94 |     |      |     | C  |        |        |        |
| ATOM       | 584 | CD   | PRO | 44 | 25.425 | 10.365 | 24.745 |
| 1.00548.09 |     |      |     | C  |        |        |        |
| ATOM       | 585 | HA   | PRO | 44 | 25.307 | 12.302 | 27.348 |
| 1.00939.00 |     |      |     | H  |        |        |        |
| ATOM       | 586 | HB1  | PRO | 44 | 24.606 | 10.085 | 27.461 |
| 1.00999.99 |     |      |     | H  |        |        |        |
| ATOM       | 587 | HB2  | PRO | 44 | 26.305 | 9.841  | 27.921 |
| 1.00999.99 |     |      |     | H  |        |        |        |
| ATOM       | 588 | HG1  | PRO | 44 | 25.250 | 8.532  | 25.862 |
| 1.00999.99 |     |      |     | H  |        |        |        |
| ATOM       | 589 | HG2  | PRO | 44 | 26.904 | 9.172  | 25.777 |
| 1.00853.53 |     |      |     | H  |        |        |        |
| ATOM       | 590 | HD1  | PRO | 44 | 24.394 | 10.191 | 24.478 |
| 1.00602.45 |     |      |     | H  |        |        |        |
| ATOM       | 591 | HD2  | PRO | 44 | 26.071 | 10.243 | 23.885 |
| 1.00463.32 |     |      |     | H  |        |        |        |
| ATOM       | 592 | N    | ILE | 45 | 28.162 | 12.061 | 25.914 |
| 1.00518.33 |     |      |     | N  |        |        |        |
| ATOM       | 593 | CA   | ILE | 45 | 29.582 | 12.374 | 26.000 |
| 1.00582.79 |     |      |     | C  |        |        |        |
| ATOM       | 594 | C    | ILE | 45 | 29.782 | 13.747 | 26.632 |
| 1.00795.93 |     |      |     | C  |        |        |        |
| ATOM       | 595 | O    | ILE | 45 | 30.635 | 13.925 | 27.501 |
| 1.00898.75 |     |      |     | O  |        |        |        |
| ATOM       | 596 | CB   | ILE | 45 | 30.209 | 12.346 | 24.602 |
| 1.00474.41 |     |      |     | C  |        |        |        |
| ATOM       | 597 | CG1  | ILE | 45 | 30.211 | 10.908 | 24.076 |
| 1.00516.90 |     |      |     | C  |        |        |        |
| ATOM       | 598 | CG2  | ILE | 45 | 31.649 | 12.861 | 24.667 |
| 1.00760.75 |     |      |     | C  |        |        |        |
| ATOM       | 599 | CD1  | ILE | 45 | 30.567 | 10.906 | 22.589 |
| 1.00566.81 |     |      |     | C  |        |        |        |
| ATOM       | 600 | HN   | ILE | 45 | 27.758 | 11.899 | 25.036 |
| 1.00395.72 |     |      |     | H  |        |        |        |
| ATOM       | 601 | HA   | ILE | 45 | 30.062 | 11.633 | 26.613 |
| 1.00711.06 |     |      |     | H  |        |        |        |
| ATOM       | 602 | HB   | ILE | 45 | 29.633 | 12.973 | 23.936 |
| 1.00477.81 |     |      |     | H  |        |        |        |
| ATOM       | 603 | HG11 | ILE | 45 | 29.233 | 10.473 | 24.213 |
| 1.00624.28 |     |      |     | H  |        |        |        |



|            |     |      |     |    |        |        |        |
|------------|-----|------|-----|----|--------|--------|--------|
| ATOM       | 604 | HG12 | ILE | 45 | 30.942 | 10.329 | 24.624 |
| 1.00744.84 |     |      | H   |    |        |        |        |
| ATOM       | 605 | HG21 | ILE | 45 | 32.159 | 12.400 | 25.501 |
| 1.00920.57 |     |      | H   |    |        |        |        |
| ATOM       | 606 | HG22 | ILE | 45 | 31.643 | 13.933 | 24.800 |
| 1.00999.99 |     |      | H   |    |        |        |        |
| ATOM       | 607 | HG23 | ILE | 45 | 32.163 | 12.616 | 23.751 |
| 1.00865.46 |     |      | H   |    |        |        |        |
| ATOM       | 608 | HD11 | ILE | 45 | 29.724 | 11.267 | 22.018 |
| 1.00658.89 |     |      | H   |    |        |        |        |
| ATOM       | 609 | HD12 | ILE | 45 | 30.808 | 9.900  | 22.278 |
| 1.00734.30 |     |      | H   |    |        |        |        |
| ATOM       | 610 | HD13 | ILE | 45 | 31.419 | 11.548 | 22.422 |
| 1.00675.84 |     |      | H   |    |        |        |        |
| ATOM       | 611 | N    | ALA | 46 | 28.989 | 14.711 | 26.188 |
| 1.00999.99 |     |      | N   |    |        |        |        |
| ATOM       | 612 | CA   | ALA | 46 | 29.080 | 16.070 | 26.711 |
| 1.00999.99 |     |      | C   |    |        |        |        |
| ATOM       | 613 | C    | ALA | 46 | 27.937 | 16.927 | 26.176 |
| 1.00999.99 |     |      | C   |    |        |        |        |
| ATOM       | 614 | CB   | ALA | 46 | 30.418 | 16.695 | 26.313 |
| 1.00999.99 |     |      | C   |    |        |        |        |
| ATOM       | 615 | OT1  | ALA | 46 | 26.953 | 17.074 | 26.881 |
| 1.00999.99 |     |      | O   |    |        |        |        |
| ATOM       | 616 | OT2  | ALA | 46 | 28.065 | 17.425 | 25.070 |
| 1.00999.99 |     |      | O   |    |        |        |        |
| ATOM       | 617 | HN   | ALA | 46 | 28.329 | 14.504 | 25.495 |
| 1.00999.99 |     |      | H   |    |        |        |        |
| ATOM       | 618 | HA   | ALA | 46 | 29.019 | 16.035 | 27.788 |
| 1.00999.99 |     |      | H   |    |        |        |        |
| ATOM       | 619 | HB1  | ALA | 46 | 31.226 | 16.084 | 26.689 |
| 1.00999.99 |     |      | H   |    |        |        |        |
| ATOM       | 620 | HB2  | ALA | 46 | 30.491 | 17.687 | 26.732 |
| 1.00999.99 |     |      | H   |    |        |        |        |
| ATOM       | 621 | HB3  | ALA | 46 | 30.482 | 16.752 | 25.237 |
| 1.00999.99 |     |      | H   |    |        |        |        |
| ENDMDL     |     |      |     |    |        |        |        |
| TER        |     |      |     |    |        |        |        |
| MODEL      | 6   |      |     |    |        |        |        |
| ATOM       | 1   | N    | GLY | 1  | 25.876 | -2.630 | 12.500 |
| 1.00999.99 |     |      | N   |    |        |        |        |
| ATOM       | 2   | CA   | GLY | 1  | 25.932 | -2.082 | 13.885 |
| 1.00999.99 |     |      | C   |    |        |        |        |
| ATOM       | 3   | C    | GLY | 1  | 24.884 | -0.985 | 14.042 |
| 1.00999.99 |     |      | C   |    |        |        |        |
| ATOM       | 4   | O    | GLY | 1  | 24.421 | -0.710 | 15.148 |
| 1.00999.99 |     |      | O   |    |        |        |        |
| ATOM       | 5   | HA1  | GLY | 1  | 26.912 | -1.668 | 14.070 |
| 1.00999.99 |     |      | H   |    |        |        |        |
| ATOM       | 6   | HA2  | GLY | 1  | 25.736 | -2.874 | 14.594 |
| 1.00999.99 |     |      | H   |    |        |        |        |
| ATOM       | 7   | HT1  | GLY | 1  | 25.209 | -3.426 | 12.470 |

|            |    |      |     |   |   |        |        |        |      |  |
|------------|----|------|-----|---|---|--------|--------|--------|------|--|
| 1.00999.99 |    |      |     |   |   |        |        |        |      |  |
| ATOM       | 8  | HT2  | GLY | H | 1 | 26.822 | -2.959 | 12.219 |      |  |
| 1.00999.99 |    |      |     |   |   |        |        |        |      |  |
| ATOM       | 9  | HT3  | GLY | H | 1 | 25.559 | -1.888 | 11.846 |      |  |
| 1.00999.99 |    |      |     |   |   |        |        |        |      |  |
| ATOM       | 10 | N    | LEU | H | 2 | 24.517 | -0.361 | 12.927 |      |  |
| 1.00999.99 |    |      |     |   |   |        |        |        |      |  |
| ATOM       | 11 | CA   | LEU | N | 2 | 23.523 | 0.706  | 12.952 |      |  |
| 1.00895.59 |    |      |     |   |   |        |        |        |      |  |
| ATOM       | 12 | C    | LEU | C | 2 | 22.134 | 0.130  | 13.210 |      |  |
| 1.00532.27 |    |      |     |   |   |        |        |        |      |  |
| ATOM       | 13 | O    | LEU | C | 2 | 21.787 | -0.930 | 12.689 |      |  |
| 1.00625.21 |    |      |     |   |   |        |        |        |      |  |
| ATOM       | 14 | CB   | LEU | O | 2 | 23.520 | 1.443  | 11.608 |      |  |
| 1.00999.99 |    |      |     |   |   |        |        |        |      |  |
| ATOM       | 15 | CG   | LEU | C | 2 | 24.920 | 1.996  | 11.306 |      |  |
| 1.00999.99 |    |      |     |   |   |        |        |        |      |  |
| ATOM       | 16 | CD1  | LEU | C | 2 | 24.916 | 2.630  | 9.912  |      |  |
| 1.00999.99 |    |      |     |   |   |        |        |        |      |  |
| ATOM       | 17 | CD2  | LEU | C | 2 | 25.307 | 3.056  | 12.352 |      |  |
| 1.00999.99 |    |      |     |   |   |        |        |        |      |  |
| ATOM       | 18 | HN   | LEU | C | 2 | 24.921 | -0.623 | 12.074 |      |  |
| 1.00999.99 |    |      |     |   |   |        |        |        |      |  |
| ATOM       | 19 | HA   | LEU | H | 2 | 23.766 | 1.402  | 13.736 |      |  |
| 1.00890.87 |    |      |     |   |   |        |        |        |      |  |
| ATOM       | 20 | HB1  | LEU | H | 2 | 22.814 | 2.258  | 11.648 |      |  |
| 1.00924.07 |    |      |     |   |   |        |        |        |      |  |
| ATOM       | 21 | HB2  | LEU | H | 2 | 23.231 | 0.757  | 10.825 |      |  |
| 1.00999.99 |    |      |     |   |   |        |        |        |      |  |
| ATOM       | 22 | HG   | LEU | H | 2 | 25.636 | 1.187  | 11.327 |      |  |
| 1.00999.99 |    |      |     |   |   |        |        |        |      |  |
| ATOM       | 23 | HD11 | LEU | H | 2 | 24.227 | 3.463  | 9.896  |      |  |
| 1.00999.99 |    |      |     |   |   |        |        |        |      |  |
| ATOM       | 24 | HD12 | LEU | H | 2 | 24.609 | 1.897  | 9.182  |      |  |
| 1.00999.99 |    |      |     |   |   |        |        |        |      |  |
| ATOM       | 25 | HD13 | LEU | H | 2 | 25.909 | 2.982  | 9.675  |      |  |
| 1.00999.99 |    |      |     |   |   |        |        |        |      |  |
| ATOM       | 26 | HD21 | LEU | H | 2 | 26.068 | 3.707  | 11.945 |      |  |
| 1.00999.99 |    |      |     |   |   |        |        |        |      |  |
| ATOM       | 27 | HD22 | LEU | H | 2 | 25.696 | 2.567  | 13.233 |      |  |
| 1.00999.99 |    |      |     |   |   |        |        |        |      |  |
| ATOM       | 28 | HD23 | LEU | H | 2 | 24.439 | 3.642  | 12.618 |      |  |
| 1.00999.99 |    |      |     |   |   |        |        |        |      |  |
| ATOM       | 29 | N    | CYS | H | 3 | 21.338 | 0.835  | 14.011 |      |  |
| 1.00271.28 |    |      |     |   |   |        |        |        |      |  |
| ATOM       | 30 | CA   | CYS | N | 3 | 19.987 | 0.373  | 14.315 |      |  |
| 1.00104.50 |    |      |     |   |   |        |        |        |      |  |
| ATOM       | 31 | C    | CYS | C | 3 | 19.060 | 0.640  | 13.131 | 1.00 |  |
| 90.98      |    |      |     |   |   |        |        |        |      |  |
| ATOM       | 32 | O    | CYS | C | 3 | 18.835 | 1.788  | 12.750 |      |  |
| 1.00207.28 |    |      |     |   |   |        |        |        |      |  |
| ATOM       | 33 | CB   | CYS | O | 3 | 19.457 | 1.072  | 15.582 | 1.00 |  |

|            |    |     |     |   |        |        |        |      |     |
|------------|----|-----|-----|---|--------|--------|--------|------|-----|
| 37.83      |    |     | C   |   |        |        |        |      |     |
| ATOM       | 34 | SG  | CYS | 3 | 19.910 | 0.100  | 17.043 | 1.00 |     |
| 81.56      |    |     | S   |   |        |        |        |      |     |
| ATOM       | 35 | HN  | CYS | 3 | 21.660 | 1.675  | 14.397 |      |     |
| 1.00296.55 |    |     |     |   |        |        |        |      | H   |
| ATOM       | 36 | HA  | CYS | 3 | 20.018 | -0.691 | 14.494 |      |     |
| 1.00166.45 |    |     |     |   |        |        |        |      | H   |
| ATOM       | 37 | HB1 | CYS | 3 | 18.380 | 1.161  | 15.532 | 1.00 |     |
| 40.38      |    |     | H   |   |        |        |        |      |     |
| ATOM       | 38 | HB2 | CYS | 3 | 19.894 | 2.057  | 15.658 | 1.00 |     |
| 98.45      |    |     | H   |   |        |        |        |      |     |
| ATOM       | 39 | N   | SER | 4 | 18.530 | -0.434 | 12.557 | 1.00 |     |
| 85.31      |    |     | N   |   |        |        |        |      |     |
| ATOM       | 40 | CA  | SER | 4 | 17.630 | -0.316 | 11.416 | 1.00 |     |
| 92.94      |    |     | C   |   |        |        |        |      |     |
| ATOM       | 41 | C   | SER | 4 | 16.397 | 0.478  | 11.800 | 1.00 |     |
| 67.37      |    |     | C   |   |        |        |        |      |     |
| ATOM       | 42 | O   | SER | 4 | 15.923 | 1.328  | 11.047 |      |     |
| 1.00102.28 |    |     |     |   |        |        |        |      | O   |
| ATOM       | 43 | CB  | SER | 4 | 17.175 | -1.702 | 10.968 |      |     |
| 1.00123.83 |    |     |     |   |        |        |        |      | C   |
| ATOM       | 44 | OG  | SER | 4 | 16.394 | -1.579 | 9.787  |      |     |
| 1.00178.89 |    |     |     |   |        |        |        |      | O   |
| ATOM       | 45 | HN  | SER | 4 | 18.748 | -1.323 | 12.907 |      |     |
| 1.00163.03 |    |     |     |   |        |        |        |      | H   |
| ATOM       | 46 | HA  | SER | 4 | 18.138 | 0.174  | 10.600 |      |     |
| 1.00129.78 |    |     |     |   |        |        |        |      | H   |
| ATOM       | 47 | HB1 | SER | 4 | 16.577 | -2.146 | 11.758 |      |     |
| 1.00105.26 |    |     |     |   |        |        |        |      | H   |
| ATOM       | 48 | HB2 | SER | 4 | 18.032 | -2.324 | 10.770 |      |     |
| 1.00156.87 |    |     |     |   |        |        |        |      | H   |
| ATOM       | 49 | HG  | SER | 4 | 15.572 | -2.056 | 9.924  |      |     |
| 1.00218.16 |    |     |     |   |        |        |        |      | H   |
| ATOM       | 50 | N   | GLU | 5 | 15.867 | 0.165  | 12.976 | 1.00 |     |
| 41.67      |    |     | N   |   |        |        |        |      |     |
| ATOM       | 51 | CA  | GLU | 5 | 14.663 | 0.816  | 13.469 | 1.00 |     |
| 41.21      |    |     | C   |   |        |        |        |      |     |
| ATOM       | 52 | C   | GLU | 5 | 14.659 | 0.864  | 14.993 | 1.00 |     |
| 41.92      |    |     | C   |   |        |        |        |      |     |
| ATOM       | 53 | O   | GLU | 5 | 15.521 | 0.278  | 15.646 | 1.00 |     |
| 74.72      |    |     | O   |   |        |        |        |      |     |
| ATOM       | 54 | CB  | GLU | 5 | 13.442 | 0.051  | 12.970 | 1.00 |     |
| 49.24      |    |     | C   |   |        |        |        |      |     |
| ATOM       | 55 | CG  | GLU | 5 | 13.537 | -1.396 | 13.435 | 1.00 |     |
| 55.48      |    |     | C   |   |        |        |        |      |     |
| ATOM       | 56 | CD  | GLU | 5 | 12.461 | -2.238 | 12.758 | 1.00 |     |
| 92.06      |    |     | C   |   |        |        |        |      |     |
| ATOM       | 57 | OE1 | GLU | 5 | 12.419 | -3.430 | 13.018 |      |     |
| 1.00206.49 |    |     |     |   |        |        |        |      | O   |
| ATOM       | 58 | OE2 | GLU | 5 | 11.695 | -1.679 | 11.991 |      |     |
| 1.00197.24 |    |     |     |   |        |        |        |      | O1- |
| ATOM       | 59 | HN  | GLU | 5 | 16.285 | -0.538 | 13.516 | 1.00 |     |

|            |    |      |     |   |        |        |        |      |  |
|------------|----|------|-----|---|--------|--------|--------|------|--|
| 45.52      |    |      | H   |   |        |        |        |      |  |
| ATOM       | 60 | HA   | GLU | 5 | 14.620 | 1.817  | 13.086 | 1.00 |  |
| 60.63      |    |      | H   |   |        |        |        |      |  |
| ATOM       | 61 | HB1  | GLU | 5 | 13.411 | 0.078  | 11.891 | 1.00 |  |
| 61.59      |    |      | H   |   |        |        |        |      |  |
| ATOM       | 62 | HB2  | GLU | 5 | 12.551 | 0.498  | 13.368 | 1.00 |  |
| 63.66      |    |      | H   |   |        |        |        |      |  |
| ATOM       | 63 | HG1  | GLU | 5 | 13.405 | -1.438 | 14.505 | 1.00 |  |
| 58.03      |    |      | H   |   |        |        |        |      |  |
| ATOM       | 64 | HG2  | GLU | 5 | 14.511 | -1.778 | 13.179 | 1.00 |  |
| 57.77      |    |      | H   |   |        |        |        |      |  |
| ATOM       | 65 | N    | ASN | 6 | 13.681 | 1.570  | 15.550 | 1.00 |  |
| 50.73      |    |      | N   |   |        |        |        |      |  |
| ATOM       | 66 | CA   | ASN | 6 | 13.569 | 1.693  | 16.998 | 1.00 |  |
| 71.04      |    |      | C   |   |        |        |        |      |  |
| ATOM       | 67 | C    | ASN | 6 | 13.259 | 0.337  | 17.625 | 1.00 |  |
| 65.17      |    |      | C   |   |        |        |        |      |  |
| ATOM       | 68 | O    | ASN | 6 | 13.388 | 0.156  | 18.835 | 1.00 |  |
| 94.86      |    |      | O   |   |        |        |        |      |  |
| ATOM       | 69 | CB   | ASN | 6 | 12.457 | 2.685  | 17.346 | 1.00 |  |
| 94.83      |    |      | C   |   |        |        |        |      |  |
| ATOM       | 70 | CG   | ASN | 6 | 12.900 | 4.105  | 17.005 |      |  |
| 1.00160.94 |    |      | C   |   |        |        |        |      |  |
| ATOM       | 71 | ND2  | ASN | 6 | 12.003 | 5.038  | 16.841 |      |  |
| 1.00244.88 |    |      | N   |   |        |        |        |      |  |
| ATOM       | 72 | OD1  | ASN | 6 | 14.097 | 4.370  | 16.883 |      |  |
| 1.00219.73 |    |      | O   |   |        |        |        |      |  |
| ATOM       | 73 | HN   | ASN | 6 | 13.024 | 2.015  | 14.976 | 1.00 |  |
| 72.81      |    |      | H   |   |        |        |        |      |  |
| ATOM       | 74 | HA   | ASN | 6 | 14.502 | 2.061  | 17.394 | 1.00 |  |
| 96.02      |    |      | H   |   |        |        |        |      |  |
| ATOM       | 75 | HB1  | ASN | 6 | 12.239 | 2.625  | 18.402 |      |  |
| 1.00111.09 |    |      | H   |   |        |        |        |      |  |
| ATOM       | 76 | HB2  | ASN | 6 | 11.570 | 2.442  | 16.781 | 1.00 |  |
| 98.13      |    |      | H   |   |        |        |        |      |  |
| ATOM       | 77 | HD21 | ASN | 6 | 11.052 | 4.825  | 16.937 |      |  |
| 1.00272.43 |    |      | H   |   |        |        |        |      |  |
| ATOM       | 78 | HD22 | ASN | 6 | 12.281 | 5.952  | 16.621 |      |  |
| 1.00336.78 |    |      | H   |   |        |        |        |      |  |
| ATOM       | 79 | N    | GLY | 7 | 12.848 | -0.609 | 16.790 | 1.00 |  |
| 51.80      |    |      | N   |   |        |        |        |      |  |
| ATOM       | 80 | CA   | GLY | 7 | 12.518 | -1.948 | 17.262 | 1.00 |  |
| 71.47      |    |      | C   |   |        |        |        |      |  |
| ATOM       | 81 | C    | GLY | 7 | 13.761 | -2.694 | 17.738 | 1.00 |  |
| 41.04      |    |      | C   |   |        |        |        |      |  |
| ATOM       | 82 | O    | GLY | 7 | 13.661 | -3.771 | 18.325 | 1.00 |  |
| 44.54      |    |      | O   |   |        |        |        |      |  |
| ATOM       | 83 | HN   | GLY | 7 | 12.764 | -0.403 | 15.835 | 1.00 |  |
| 45.49      |    |      | H   |   |        |        |        |      |  |
| ATOM       | 84 | HA1  | GLY | 7 | 12.063 | -2.505 | 16.455 |      |  |
| 1.00103.52 |    |      | H   |   |        |        |        |      |  |
| ATOM       | 85 | HA2  | GLY | 7 | 11.817 | -1.872 | 18.078 |      |  |

|            |     |     |     |    |        |        |        |      |  |  |  |  |  |  |  |     |
|------------|-----|-----|-----|----|--------|--------|--------|------|--|--|--|--|--|--|--|-----|
| 1.00108.67 |     |     |     |    |        |        |        |      |  |  |  |  |  |  |  | H   |
| ATOM       | 86  | N   | ASP | 8  | 14.936 | -2.121 | 17.480 | 1.00 |  |  |  |  |  |  |  |     |
| 27.00      |     |     | N   |    |        |        |        |      |  |  |  |  |  |  |  |     |
| ATOM       | 87  | CA  | ASP | 8  | 16.183 | -2.756 | 17.891 | 1.00 |  |  |  |  |  |  |  |     |
| 14.15      |     |     | C   |    |        |        |        |      |  |  |  |  |  |  |  |     |
| ATOM       | 88  | C   | ASP | 8  | 16.103 | -3.197 | 19.348 | 1.00 |  |  |  |  |  |  |  |     |
| 9.37       |     |     | C   |    |        |        |        |      |  |  |  |  |  |  |  |     |
| ATOM       | 89  | O   | ASP | 8  | 15.917 | -4.379 | 19.636 | 1.00 |  |  |  |  |  |  |  |     |
| 14.61      |     |     | O   |    |        |        |        |      |  |  |  |  |  |  |  |     |
| ATOM       | 90  | CB  | ASP | 8  | 17.351 | -1.786 | 17.706 | 1.00 |  |  |  |  |  |  |  |     |
| 15.06      |     |     | C   |    |        |        |        |      |  |  |  |  |  |  |  |     |
| ATOM       | 91  | CG  | ASP | 8  | 18.639 | -2.416 | 18.224 | 1.00 |  |  |  |  |  |  |  |     |
| 21.22      |     |     | C   |    |        |        |        |      |  |  |  |  |  |  |  |     |
| ATOM       | 92  | OD1 | ASP | 8  | 19.104 | -3.358 | 17.603 |      |  |  |  |  |  |  |  |     |
| 1.00119.56 |     |     |     |    |        |        |        |      |  |  |  |  |  |  |  | O   |
| ATOM       | 93  | OD2 | ASP | 8  | 19.141 | -1.947 | 19.231 |      |  |  |  |  |  |  |  |     |
| 1.00133.27 |     |     |     |    |        |        |        |      |  |  |  |  |  |  |  | O1- |
| ATOM       | 94  | HN  | ASP | 8  | 14.961 | -1.263 | 17.006 | 1.00 |  |  |  |  |  |  |  |     |
| 35.63      |     |     | H   |    |        |        |        |      |  |  |  |  |  |  |  |     |
| ATOM       | 95  | HA  | ASP | 8  | 16.351 | -3.623 | 17.277 | 1.00 |  |  |  |  |  |  |  |     |
| 20.92      |     |     | H   |    |        |        |        |      |  |  |  |  |  |  |  |     |
| ATOM       | 96  | HB1 | ASP | 8  | 17.151 | -0.878 | 18.254 | 1.00 |  |  |  |  |  |  |  |     |
| 29.39      |     |     | H   |    |        |        |        |      |  |  |  |  |  |  |  |     |
| ATOM       | 97  | HB2 | ASP | 8  | 17.460 | -1.555 | 16.655 | 1.00 |  |  |  |  |  |  |  |     |
| 44.14      |     |     | H   |    |        |        |        |      |  |  |  |  |  |  |  |     |
| ATOM       | 98  | N   | CYS | 9  | 16.227 | -2.244 | 20.262 | 1.00 |  |  |  |  |  |  |  |     |
| 5.93       |     |     | N   |    |        |        |        |      |  |  |  |  |  |  |  |     |
| ATOM       | 99  | CA  | CYS | 9  | 16.148 | -2.562 | 21.684 | 1.00 |  |  |  |  |  |  |  |     |
| 7.54       |     |     | C   |    |        |        |        |      |  |  |  |  |  |  |  |     |
| ATOM       | 100 | C   | CYS | 9  | 14.770 | -3.122 | 22.013 | 1.00 |  |  |  |  |  |  |  |     |
| 14.60      |     |     | C   |    |        |        |        |      |  |  |  |  |  |  |  |     |
| ATOM       | 101 | O   | CYS | 9  | 14.639 | -4.111 | 22.736 | 1.00 |  |  |  |  |  |  |  |     |
| 25.78      |     |     | O   |    |        |        |        |      |  |  |  |  |  |  |  |     |
| ATOM       | 102 | CB  | CYS | 9  | 16.407 | -1.318 | 22.523 | 1.00 |  |  |  |  |  |  |  |     |
| 6.63       |     |     | C   |    |        |        |        |      |  |  |  |  |  |  |  |     |
| ATOM       | 103 | SG  | CYS | 9  | 18.160 | -0.910 | 22.419 | 1.00 |  |  |  |  |  |  |  |     |
| 10.91      |     |     | S   |    |        |        |        |      |  |  |  |  |  |  |  |     |
| ATOM       | 104 | HN  | CYS | 9  | 16.363 | -1.319 | 19.976 | 1.00 |  |  |  |  |  |  |  |     |
| 6.51       |     |     | H   |    |        |        |        |      |  |  |  |  |  |  |  |     |
| ATOM       | 105 | HA  | CYS | 9  | 16.901 | -3.295 | 21.922 | 1.00 |  |  |  |  |  |  |  |     |
| 11.12      |     |     | H   |    |        |        |        |      |  |  |  |  |  |  |  |     |
| ATOM       | 106 | HB1 | CYS | 9  | 16.142 | -1.511 | 23.551 | 1.00 |  |  |  |  |  |  |  |     |
| 11.28      |     |     | H   |    |        |        |        |      |  |  |  |  |  |  |  |     |
| ATOM       | 107 | HB2 | CYS | 9  | 15.820 | -0.494 | 22.145 | 1.00 |  |  |  |  |  |  |  |     |
| 5.04       |     |     | H   |    |        |        |        |      |  |  |  |  |  |  |  |     |
| ATOM       | 108 | N   | ALA | 10 | 13.750 | -2.478 | 21.460 | 1.00 |  |  |  |  |  |  |  |     |
| 16.26      |     |     | N   |    |        |        |        |      |  |  |  |  |  |  |  |     |
| ATOM       | 109 | CA  | ALA | 10 | 12.369 | -2.897 | 21.669 | 1.00 |  |  |  |  |  |  |  |     |
| 32.04      |     |     | C   |    |        |        |        |      |  |  |  |  |  |  |  |     |
| ATOM       | 110 | C   | ALA | 10 | 11.434 | -2.055 | 20.801 | 1.00 |  |  |  |  |  |  |  |     |
| 45.47      |     |     | C   |    |        |        |        |      |  |  |  |  |  |  |  |     |
| ATOM       | 111 | O   | ALA | 10 | 11.835 | -1.019 | 20.272 |      |  |  |  |  |  |  |  |     |

|            |     |     |     |     |    |        |        |        |      |
|------------|-----|-----|-----|-----|----|--------|--------|--------|------|
| 1.00119.04 |     |     |     | O   |    |        |        |        |      |
| ATOM       | 112 | CB  | ALA |     | 10 | 11.985 | -2.756 | 23.146 | 1.00 |
| 30.10      |     |     | C   |     |    |        |        |        |      |
| ATOM       | 113 | HN  | ALA |     | 10 | 13.932 | -1.703 | 20.890 | 1.00 |
| 12.81      |     |     | H   |     |    |        |        |        |      |
| ATOM       | 114 | HA  | ALA |     | 10 | 12.273 | -3.934 | 21.380 | 1.00 |
| 47.14      |     |     | H   |     |    |        |        |        |      |
| ATOM       | 115 | HB1 | ALA |     | 10 | 11.167 | -3.423 | 23.372 | 1.00 |
| 84.37      |     |     | H   |     |    |        |        |        |      |
| ATOM       | 116 | HB2 | ALA |     | 10 | 11.683 | -1.739 | 23.347 |      |
| 1.00118.20 |     |     |     | H   |    |        |        |        |      |
| ATOM       | 117 | HB3 | ALA |     | 10 | 12.834 | -3.006 | 23.764 |      |
| 1.00117.32 |     |     |     | H   |    |        |        |        |      |
| ATOM       | 118 | N   | ALA |     | 11 | 10.193 | -2.505 | 20.655 | 1.00 |
| 30.62      |     |     | N   |     |    |        |        |        |      |
| ATOM       | 119 | CA  | ALA |     | 11 | 9.223  | -1.779 | 19.844 | 1.00 |
| 35.24      |     |     | C   |     |    |        |        |        |      |
| ATOM       | 120 | C   | ALA |     | 11 | 8.977  | -0.378 | 20.404 | 1.00 |
| 22.78      |     |     | C   |     |    |        |        |        |      |
| ATOM       | 121 | O   | ALA |     | 11 | 8.872  | 0.589  | 19.650 | 1.00 |
| 53.33      |     |     | O   |     |    |        |        |        |      |
| ATOM       | 122 | CB  | ALA |     | 11 | 7.902  | -2.549 | 19.802 | 1.00 |
| 60.49      |     |     | C   |     |    |        |        |        |      |
| ATOM       | 123 | HN  | ALA |     | 11 | 9.927  | -3.338 | 21.097 | 1.00 |
| 50.37      |     |     | H   |     |    |        |        |        |      |
| ATOM       | 124 | HA  | ALA |     | 11 | 9.605  | -1.691 | 18.838 | 1.00 |
| 41.70      |     |     | H   |     |    |        |        |        |      |
| ATOM       | 125 | HB1 | ALA |     | 11 | 8.091  | -3.572 | 19.508 |      |
| 1.00157.06 |     |     |     | H   |    |        |        |        |      |
| ATOM       | 126 | HB2 | ALA |     | 11 | 7.238  | -2.086 | 19.086 |      |
| 1.00148.83 |     |     |     | H   |    |        |        |        |      |
| ATOM       | 127 | HB3 | ALA |     | 11 | 7.444  | -2.534 | 20.779 |      |
| 1.00137.06 |     |     |     | H   |    |        |        |        |      |
| ATOM       | 128 | N   | ASP |     | 12 | 8.877  | -0.278 | 21.726 | 1.00 |
| 18.98      |     |     | N   |     |    |        |        |        |      |
| ATOM       | 129 | CA  | ASP |     | 12 | 8.633  | 1.011  | 22.374 | 1.00 |
| 31.05      |     |     | C   |     |    |        |        |        |      |
| ATOM       | 130 | C   | ASP |     | 12 | 9.933  | 1.790  | 22.572 | 1.00 |
| 22.98      |     |     | C   |     |    |        |        |        |      |
| ATOM       | 131 | O   | ASP |     | 12 | 9.936  | 3.020  | 22.555 | 1.00 |
| 37.14      |     |     | O   |     |    |        |        |        |      |
| ATOM       | 132 | CB  | ASP |     | 12 | 7.964  | 0.790  | 23.733 | 1.00 |
| 48.35      |     |     | C   |     |    |        |        |        |      |
| ATOM       | 133 | CG  | ASP |     | 12 | 6.546  | 0.264  | 23.535 |      |
| 1.00104.83 |     |     |     | C   |    |        |        |        |      |
| ATOM       | 134 | OD1 | ASP |     | 12 | 5.978  | -0.225 | 24.498 |      |
| 1.00258.73 |     |     |     | O   |    |        |        |        |      |
| ATOM       | 135 | OD2 | ASP |     | 12 | 6.049  | 0.358  | 22.425 |      |
| 1.00213.46 |     |     |     | O1- |    |        |        |        |      |
| ATOM       | 136 | HN  | ASP |     | 12 | 8.963  | -1.083 | 22.279 | 1.00 |
| 36.19      |     |     | H   |     |    |        |        |        |      |
| ATOM       | 137 | HA  | ASP |     | 12 | 7.968  | 1.596  | 21.755 | 1.00 |

|            |     |     |     |    |        |        |        |      |
|------------|-----|-----|-----|----|--------|--------|--------|------|
| 49.76      |     |     | H   |    |        |        |        |      |
| ATOM       | 138 | HB1 | ASP | 12 | 7.926  | 1.726  | 24.270 | 1.00 |
| 95.71      |     |     | H   |    |        |        |        |      |
| ATOM       | 139 | HB2 | ASP | 12 | 8.537  | 0.072  | 24.301 | 1.00 |
| 54.37      |     |     | H   |    |        |        |        |      |
| ATOM       | 140 | N   | GLU | 13 | 11.031 | 1.068  | 22.768 | 1.00 |
| 17.60      |     |     | N   |    |        |        |        |      |
| ATOM       | 141 | CA  | GLU | 13 | 12.327 | 1.705  | 22.983 | 1.00 |
| 12.01      |     |     | C   |    |        |        |        |      |
| ATOM       | 142 | C   | GLU | 13 | 12.895 | 2.264  | 21.680 | 1.00 |
| 10.07      |     |     | C   |    |        |        |        |      |
| ATOM       | 143 | O   | GLU | 13 | 12.538 | 1.815  | 20.590 | 1.00 |
| 12.81      |     |     | O   |    |        |        |        |      |
| ATOM       | 144 | CB  | GLU | 13 | 13.306 | 0.699  | 23.586 | 1.00 |
| 11.74      |     |     | C   |    |        |        |        |      |
| ATOM       | 145 | CG  | GLU | 13 | 12.810 | 0.277  | 24.972 | 1.00 |
| 13.49      |     |     | C   |    |        |        |        |      |
| ATOM       | 146 | CD  | GLU | 13 | 12.916 | 1.447  | 25.942 |      |
| 1.00142.36 |     |     | C   |    |        |        |        |      |
| ATOM       | 147 | OE1 | GLU | 13 | 12.296 | 1.380  | 26.992 |      |
| 1.00339.06 |     |     | O   |    |        |        |        |      |
| ATOM       | 148 | OE2 | GLU | 13 | 13.607 | 2.396  | 25.620 |      |
| 1.00335.28 |     |     | O1- |    |        |        |        |      |
| ATOM       | 149 | HN  | GLU | 13 | 10.967 | 0.090  | 22.781 | 1.00 |
| 28.36      |     |     | H   |    |        |        |        |      |
| ATOM       | 150 | HA  | GLU | 13 | 12.199 | 2.520  | 23.678 | 1.00 |
| 13.06      |     |     | H   |    |        |        |        |      |
| ATOM       | 151 | HB1 | GLU | 13 | 14.280 | 1.155  | 23.676 | 1.00 |
| 13.76      |     |     | H   |    |        |        |        |      |
| ATOM       | 152 | HB2 | GLU | 13 | 13.372 | -0.167 | 22.945 | 1.00 |
| 9.94       |     |     | H   |    |        |        |        |      |
| ATOM       | 153 | HG1 | GLU | 13 | 13.411 | -0.543 | 25.334 | 1.00 |
| 66.02      |     |     | H   |    |        |        |        |      |
| ATOM       | 154 | HG2 | GLU | 13 | 11.779 | -0.034 | 24.904 | 1.00 |
| 56.23      |     |     | H   |    |        |        |        |      |
| ATOM       | 155 | N   | CYS | 14 | 13.784 | 3.254  | 21.807 | 1.00 |
| 9.12       |     |     | N   |    |        |        |        |      |
| ATOM       | 156 | CA  | CYS | 14 | 14.412 | 3.894  | 20.645 | 1.00 |
| 10.69      |     |     | C   |    |        |        |        |      |
| ATOM       | 157 | C   | CYS | 14 | 15.880 | 3.497  | 20.549 | 1.00 |
| 9.56       |     |     | C   |    |        |        |        |      |
| ATOM       | 158 | O   | CYS | 14 | 16.489 | 3.106  | 21.542 | 1.00 |
| 13.62      |     |     | O   |    |        |        |        |      |
| ATOM       | 159 | CB  | CYS | 14 | 14.305 | 5.416  | 20.775 | 1.00 |
| 13.96      |     |     | C   |    |        |        |        |      |
| ATOM       | 160 | SG  | CYS | 14 | 15.334 | 6.209  | 19.515 | 1.00 |
| 42.96      |     |     | S   |    |        |        |        |      |
| ATOM       | 161 | HN  | CYS | 14 | 14.024 | 3.563  | 22.708 | 1.00 |
| 9.76       |     |     | H   |    |        |        |        |      |
| ATOM       | 162 | HA  | CYS | 14 | 13.905 | 3.585  | 19.741 | 1.00 |
| 15.54      |     |     | H   |    |        |        |        |      |
| ATOM       | 163 | HB1 | CYS | 14 | 14.640 | 5.714  | 21.757 | 1.00 |

|            |     |      |     |    |        |       |        |      |
|------------|-----|------|-----|----|--------|-------|--------|------|
| 50.72      |     |      | H   |    |        |       |        |      |
| ATOM       | 164 | HB2  | CYS | 14 | 13.275 | 5.714 | 20.640 | 1.00 |
| 46.13      |     |      | H   |    |        |       |        |      |
| ATOM       | 165 | N    | CYS | 15 | 16.448 | 3.610 | 19.347 | 1.00 |
| 9.60       |     |      | N   |    |        |       |        |      |
| ATOM       | 166 | CA   | CYS | 15 | 17.851 | 3.269 | 19.130 | 1.00 |
| 9.28       |     |      | C   |    |        |       |        |      |
| ATOM       | 167 | C    | CYS | 15 | 18.447 | 4.185 | 18.076 | 1.00 |
| 9.92       |     |      | C   |    |        |       |        |      |
| ATOM       | 168 | O    | CYS | 15 | 17.844 | 4.404 | 17.025 | 1.00 |
| 13.31      |     |      | O   |    |        |       |        |      |
| ATOM       | 169 | CB   | CYS | 15 | 17.988 | 1.822 | 18.654 | 1.00 |
| 12.90      |     |      | C   |    |        |       |        |      |
| ATOM       | 170 | SG   | CYS | 15 | 19.747 | 1.389 | 18.590 | 1.00 |
| 39.11      |     |      | S   |    |        |       |        |      |
| ATOM       | 171 | HN   | CYS | 15 | 15.915 | 3.939 | 18.592 | 1.00 |
| 13.12      |     |      | H   |    |        |       |        |      |
| ATOM       | 172 | HA   | CYS | 15 | 18.402 | 3.388 | 20.053 | 1.00 |
| 8.26       |     |      | H   |    |        |       |        |      |
| ATOM       | 173 | HB1  | CYS | 15 | 17.558 | 1.726 | 17.667 | 1.00 |
| 24.82      |     |      | H   |    |        |       |        |      |
| ATOM       | 174 | HB2  | CYS | 15 | 17.473 | 1.165 | 19.335 | 1.00 |
| 27.31      |     |      | H   |    |        |       |        |      |
| ATOM       | 175 | N    | VAL | 16 | 19.631 | 4.718 | 18.350 | 1.00 |
| 9.56       |     |      | N   |    |        |       |        |      |
| ATOM       | 176 | CA   | VAL | 16 | 20.283 | 5.602 | 17.398 | 1.00 |
| 11.99      |     |      | C   |    |        |       |        |      |
| ATOM       | 177 | C    | VAL | 16 | 21.791 | 5.563 | 17.605 | 1.00 |
| 7.73       |     |      | C   |    |        |       |        |      |
| ATOM       | 178 | O    | VAL | 16 | 22.293 | 5.911 | 18.673 | 1.00 |
| 8.83       |     |      | O   |    |        |       |        |      |
| ATOM       | 179 | CB   | VAL | 16 | 19.745 | 7.026 | 17.568 | 1.00 |
| 18.37      |     |      | C   |    |        |       |        |      |
| ATOM       | 180 | CG1  | VAL | 16 | 20.073 | 7.555 | 18.969 | 1.00 |
| 39.61      |     |      | C   |    |        |       |        |      |
| ATOM       | 181 | CG2  | VAL | 16 | 20.370 | 7.933 | 16.509 |      |
| 1.00115.21 |     |      |     | C  |        |       |        |      |
| ATOM       | 182 | HN   | VAL | 16 | 20.077 | 4.509 | 19.203 | 1.00 |
| 9.76       |     |      | H   |    |        |       |        |      |
| ATOM       | 183 | HA   | VAL | 16 | 20.065 | 5.266 | 16.394 | 1.00 |
| 17.27      |     |      | H   |    |        |       |        |      |
| ATOM       | 184 | HB   | VAL | 16 | 18.672 | 7.015 | 17.438 | 1.00 |
| 52.63      |     |      | H   |    |        |       |        |      |
| ATOM       | 185 | HG11 | VAL | 16 | 19.923 | 6.770 | 19.694 |      |
| 1.00128.07 |     |      |     | H  |        |       |        |      |
| ATOM       | 186 | HG12 | VAL | 16 | 19.422 | 8.385 | 19.200 |      |
| 1.00154.13 |     |      |     | H  |        |       |        |      |
| ATOM       | 187 | HG13 | VAL | 16 | 21.100 | 7.887 | 19.002 |      |
| 1.00135.74 |     |      |     | H  |        |       |        |      |
| ATOM       | 188 | HG21 | VAL | 16 | 20.157 | 7.535 | 15.529 |      |
| 1.00229.05 |     |      |     | H  |        |       |        |      |
| ATOM       | 189 | HG22 | VAL | 16 | 21.438 | 7.976 | 16.658 |      |



|            |     |      |     |     |    |        |        |        |      |
|------------|-----|------|-----|-----|----|--------|--------|--------|------|
| 1.00261.82 |     |      |     | H   |    |        |        |        |      |
| ATOM       | 190 | HG23 | VAL |     | 16 | 19.953 | 8.924  | 16.595 |      |
| 1.00210.07 |     |      |     | H   |    |        |        |        |      |
| ATOM       | 191 | N    | ASP |     | 17 | 22.510 | 5.114  | 16.579 | 1.00 |
| 14.34      |     |      | N   |     |    |        |        |        |      |
| ATOM       | 192 | CA   | ASP |     | 17 | 23.965 | 5.010  | 16.660 | 1.00 |
| 11.90      |     |      | C   |     |    |        |        |        |      |
| ATOM       | 193 | C    | ASP |     | 17 | 24.637 | 6.244  | 16.077 | 1.00 |
| 13.15      |     |      | C   |     |    |        |        |        |      |
| ATOM       | 194 | O    | ASP |     | 17 | 24.497 | 6.542  | 14.892 | 1.00 |
| 25.96      |     |      | O   |     |    |        |        |        |      |
| ATOM       | 195 | CB   | ASP |     | 17 | 24.440 | 3.770  | 15.902 | 1.00 |
| 20.80      |     |      | C   |     |    |        |        |        |      |
| ATOM       | 196 | CG   | ASP |     | 17 | 24.021 | 2.511  | 16.654 | 1.00 |
| 28.72      |     |      | C   |     |    |        |        |        |      |
| ATOM       | 197 | OD1  | ASP |     | 17 | 23.649 | 2.632  | 17.810 |      |
| 1.00135.42 |     |      |     | O   |    |        |        |        |      |
| ATOM       | 198 | OD2  | ASP |     | 17 | 24.077 | 1.446  | 16.064 |      |
| 1.00114.17 |     |      |     | O1- |    |        |        |        |      |
| ATOM       | 199 | HN   | ASP |     | 17 | 22.053 | 4.832  | 15.757 | 1.00 |
| 28.29      |     |      | H   |     |    |        |        |        |      |
| ATOM       | 200 | HA   | ASP |     | 17 | 24.259 | 4.912  | 17.695 | 1.00 |
| 10.49      |     |      | H   |     |    |        |        |        |      |
| ATOM       | 201 | HB1  | ASP |     | 17 | 25.516 | 3.793  | 15.817 | 1.00 |
| 22.42      |     |      | H   |     |    |        |        |        |      |
| ATOM       | 202 | HB2  | ASP |     | 17 | 24.002 | 3.764  | 14.915 | 1.00 |
| 29.52      |     |      | H   |     |    |        |        |        |      |
| ATOM       | 203 | N    | THR |     | 18 | 25.387 | 6.946  | 16.921 | 1.00 |
| 11.55      |     |      | N   |     |    |        |        |        |      |
| ATOM       | 204 | CA   | THR |     | 18 | 26.115 | 8.140  | 16.497 | 1.00 |
| 17.10      |     |      | C   |     |    |        |        |        |      |
| ATOM       | 205 | C    | THR |     | 18 | 27.590 | 7.807  | 16.338 | 1.00 |
| 10.63      |     |      | C   |     |    |        |        |        |      |
| ATOM       | 206 | O    | THR |     | 18 | 28.057 | 6.787  | 16.843 | 1.00 |
| 6.49       |     |      | O   |     |    |        |        |        |      |
| ATOM       | 207 | CB   | THR |     | 18 | 25.949 | 9.256  | 17.531 | 1.00 |
| 28.52      |     |      | C   |     |    |        |        |        |      |
| ATOM       | 208 | CG2  | THR |     | 18 | 24.536 | 9.832  | 17.448 | 1.00 |
| 45.38      |     |      | C   |     |    |        |        |        |      |
| ATOM       | 209 | OG1  | THR |     | 18 | 26.177 | 8.733  | 18.830 | 1.00 |
| 26.49      |     |      | O   |     |    |        |        |        |      |
| ATOM       | 210 | HN   | THR |     | 18 | 25.470 | 6.643  | 17.849 | 1.00 |
| 13.96      |     |      | H   |     |    |        |        |        |      |
| ATOM       | 211 | HA   | THR |     | 18 | 25.728 | 8.484  | 15.547 | 1.00 |
| 26.43      |     |      | H   |     |    |        |        |        |      |
| ATOM       | 212 | HB   | THR |     | 18 | 26.663 | 10.039 | 17.331 | 1.00 |
| 37.43      |     |      | H   |     |    |        |        |        |      |
| ATOM       | 213 | HG1  | THR |     | 18 | 26.568 | 7.861  | 18.734 | 1.00 |
| 71.62      |     |      | H   |     |    |        |        |        |      |
| ATOM       | 214 | HG21 | THR |     | 18 | 24.441 | 10.647 | 18.150 |      |
| 1.00100.44 |     |      |     | H   |    |        |        |        |      |
| ATOM       | 215 | HG22 | THR |     | 18 | 23.819 | 9.063  | 17.689 |      |

|            |     |      |     |   |    |        |        |        |      |
|------------|-----|------|-----|---|----|--------|--------|--------|------|
| 1.00129.42 |     |      |     | H |    |        |        |        |      |
| ATOM       | 216 | HG23 | THR |   | 18 | 24.356 | 10.196 | 16.448 |      |
| 1.00156.21 |     |      |     | H |    |        |        |        |      |
| ATOM       | 217 | N    | VAL |   | 19 | 28.318 | 8.673  | 15.646 | 1.00 |
| 16.32      |     |      | N   |   |    |        |        |        |      |
| ATOM       | 218 | CA   | VAL |   | 19 | 29.731 | 8.473  | 15.433 | 1.00 |
| 13.34      |     |      | C   |   |    |        |        |        |      |
| ATOM       | 219 | C    | VAL |   | 19 | 30.288 | 9.631  | 14.634 | 1.00 |
| 25.88      |     |      | C   |   |    |        |        |        |      |
| ATOM       | 220 | O    | VAL |   | 19 | 29.903 | 9.877  | 13.490 | 1.00 |
| 42.11      |     |      | O   |   |    |        |        |        |      |
| ATOM       | 221 | CB   | VAL |   | 19 | 30.012 | 7.157  | 14.708 | 1.00 |
| 15.48      |     |      | C   |   |    |        |        |        |      |
| ATOM       | 222 | CG1  | VAL |   | 19 | 29.152 | 7.053  | 13.443 | 1.00 |
| 29.06      |     |      | C   |   |    |        |        |        |      |
| ATOM       | 223 | CG2  | VAL |   | 19 | 31.498 | 7.109  | 14.327 | 1.00 |
| 20.67      |     |      | C   |   |    |        |        |        |      |
| ATOM       | 224 | HN   | VAL |   | 19 | 27.904 | 9.476  | 15.283 | 1.00 |
| 26.89      |     |      | H   |   |    |        |        |        |      |
| ATOM       | 225 | HA   | VAL |   | 19 | 30.222 | 8.448  | 16.395 | 1.00 |
| 8.08       |     |      | H   |   |    |        |        |        |      |
| ATOM       | 226 | HB   | VAL |   | 19 | 29.783 | 6.334  | 15.365 | 1.00 |
| 11.49      |     |      | H   |   |    |        |        |        |      |
| ATOM       | 227 | HG11 | VAL |   | 19 | 29.163 | 6.033  | 13.085 |      |
| 1.00137.43 |     |      |     | H |    |        |        |        |      |
| ATOM       | 228 | HG12 | VAL |   | 19 | 29.550 | 7.704  | 12.680 | 1.00 |
| 93.29      |     |      | H   |   |    |        |        |        |      |
| ATOM       | 229 | HG13 | VAL |   | 19 | 28.136 | 7.341  | 13.670 |      |
| 1.00108.69 |     |      |     | H |    |        |        |        |      |
| ATOM       | 230 | HG21 | VAL |   | 19 | 31.776 | 6.096  | 14.079 | 1.00 |
| 99.42      |     |      | H   |   |    |        |        |        |      |
| ATOM       | 231 | HG22 | VAL |   | 19 | 32.094 | 7.455  | 15.162 |      |
| 1.00111.36 |     |      |     | H |    |        |        |        |      |
| ATOM       | 232 | HG23 | VAL |   | 19 | 31.670 | 7.752  | 13.476 | 1.00 |
| 77.11      |     |      | H   |   |    |        |        |        |      |
| ATOM       | 233 | N    | PHE |   | 20 | 31.188 | 10.338 | 15.268 | 1.00 |
| 24.58      |     |      | N   |   |    |        |        |        |      |
| ATOM       | 234 | CA   | PHE |   | 20 | 31.831 | 11.499 | 14.677 | 1.00 |
| 40.34      |     |      | C   |   |    |        |        |        |      |
| ATOM       | 235 | C    | PHE |   | 20 | 33.222 | 11.153 | 14.164 | 1.00 |
| 40.37      |     |      | C   |   |    |        |        |        |      |
| ATOM       | 236 | O    | PHE |   | 20 | 33.494 | 11.259 | 12.968 | 1.00 |
| 66.02      |     |      | O   |   |    |        |        |        |      |
| ATOM       | 237 | CB   | PHE |   | 20 | 31.924 | 12.615 | 15.730 | 1.00 |
| 48.79      |     |      | C   |   |    |        |        |        |      |
| ATOM       | 238 | CG   | PHE |   | 20 | 32.137 | 12.031 | 17.118 | 1.00 |
| 35.75      |     |      | C   |   |    |        |        |        |      |
| ATOM       | 239 | CD1  | PHE |   | 20 | 31.117 | 11.294 | 17.749 | 1.00 |
| 30.20      |     |      | C   |   |    |        |        |        |      |
| ATOM       | 240 | CD2  | PHE |   | 20 | 33.350 | 12.245 | 17.784 | 1.00 |
| 40.95      |     |      | C   |   |    |        |        |        |      |
| ATOM       | 241 | CE1  | PHE |   | 20 | 31.321 | 10.773 | 19.031 | 1.00 |

|            |     |     |     |    |        |        |        |      |
|------------|-----|-----|-----|----|--------|--------|--------|------|
| 30.41      |     |     | C   |    |        |        |        |      |
| ATOM       | 242 | CE2 | PHE | 20 | 33.549 | 11.722 | 19.067 | 1.00 |
| 45.84      |     |     | C   |    |        |        |        |      |
| ATOM       | 243 | CZ  | PHE | 20 | 32.536 | 10.988 | 19.690 | 1.00 |
| 40.81      |     |     | C   |    |        |        |        |      |
| ATOM       | 244 | HN  | PHE | 20 | 31.412 | 10.076 | 16.176 | 1.00 |
| 16.73      |     |     | H   |    |        |        |        |      |
| ATOM       | 245 | HA  | PHE | 20 | 31.236 | 11.857 | 13.846 | 1.00 |
| 59.91      |     |     | H   |    |        |        |        |      |
| ATOM       | 246 | HB1 | PHE | 20 | 31.016 | 13.168 | 15.724 | 1.00 |
| 67.15      |     |     | H   |    |        |        |        |      |
| ATOM       | 247 | HB2 | PHE | 20 | 32.740 | 13.281 | 15.488 | 1.00 |
| 58.17      |     |     | H   |    |        |        |        |      |
| ATOM       | 248 | HD1 | PHE | 20 | 30.175 | 11.119 | 17.248 | 1.00 |
| 33.34      |     |     | H   |    |        |        |        |      |
| ATOM       | 249 | HD2 | PHE | 20 | 34.136 | 12.812 | 17.306 | 1.00 |
| 49.35      |     |     | H   |    |        |        |        |      |
| ATOM       | 250 | HE1 | PHE | 20 | 30.538 | 10.207 | 19.511 | 1.00 |
| 30.61      |     |     | H   |    |        |        |        |      |
| ATOM       | 251 | HE2 | PHE | 20 | 34.486 | 11.887 | 19.577 | 1.00 |
| 61.27      |     |     | H   |    |        |        |        |      |
| ATOM       | 252 | HZ  | PHE | 20 | 32.691 | 10.585 | 20.680 | 1.00 |
| 52.66      |     |     | H   |    |        |        |        |      |
| ATOM       | 253 | N   | GLU | 21 | 34.109 | 10.779 | 15.078 | 1.00 |
| 41.31      |     |     | N   |    |        |        |        |      |
| ATOM       | 254 | CA  | GLU | 21 | 35.476 | 10.465 | 14.726 | 1.00 |
| 56.16      |     |     | C   |    |        |        |        |      |
| ATOM       | 255 | C   | GLU | 21 | 35.751 | 8.970  | 14.801 | 1.00 |
| 58.61      |     |     | C   |    |        |        |        |      |
| ATOM       | 256 | O   | GLU | 21 | 34.858 | 8.168  | 15.072 |      |
| 1.00201.19 |     |     | O   |    |        |        |        |      |
| ATOM       | 257 | CB  | GLU | 21 | 36.369 | 11.212 | 15.692 | 1.00 |
| 57.37      |     |     | C   |    |        |        |        |      |
| ATOM       | 258 | CG  | GLU | 21 | 36.236 | 10.620 | 17.097 |      |
| 1.00193.56 |     |     | C   |    |        |        |        |      |
| ATOM       | 259 | CD  | GLU | 21 | 36.899 | 11.544 | 18.113 |      |
| 1.00304.62 |     |     | C   |    |        |        |        |      |
| ATOM       | 260 | OE1 | GLU | 21 | 36.744 | 11.300 | 19.297 |      |
| 1.00451.81 |     |     | O   |    |        |        |        |      |
| ATOM       | 261 | OE2 | GLU | 21 | 37.555 | 12.482 | 17.691 |      |
| 1.00442.88 |     |     | O1- |    |        |        |        |      |
| ATOM       | 262 | HN  | GLU | 21 | 33.851 | 10.744 | 16.019 | 1.00 |
| 50.82      |     |     | H   |    |        |        |        |      |
| ATOM       | 263 | HA  | GLU | 21 | 35.688 | 10.812 | 13.726 | 1.00 |
| 85.72      |     |     | H   |    |        |        |        |      |
| ATOM       | 264 | HB1 | GLU | 21 | 36.063 | 12.243 | 15.712 | 1.00 |
| 46.37      |     |     | H   |    |        |        |        |      |
| ATOM       | 265 | HB2 | GLU | 21 | 37.385 | 11.142 | 15.365 |      |
| 1.00131.81 |     |     | H   |    |        |        |        |      |
| ATOM       | 266 | HG1 | GLU | 21 | 36.713 | 9.657  | 17.125 |      |
| 1.00314.91 |     |     | H   |    |        |        |        |      |
| ATOM       | 267 | HG2 | GLU | 21 | 35.192 | 10.505 | 17.340 |      |

|            |     |     |     |     |    |        |       |        |      |
|------------|-----|-----|-----|-----|----|--------|-------|--------|------|
| 1.00266.92 |     |     |     | H   |    |        |       |        |      |
| ATOM       | 268 | N   | GLY |     | 22 | 37.003 | 8.617 | 14.546 | 1.00 |
| 86.70      |     |     | N   |     |    |        |       |        |      |
| ATOM       | 269 | CA  | GLY |     | 22 | 37.429 | 7.214 | 14.569 |      |
| 1.00104.66 |     |     |     | C   |    |        |       |        |      |
| ATOM       | 270 | C   | GLY |     | 22 | 37.995 | 6.828 | 15.931 | 1.00 |
| 71.50      |     |     | C   |     |    |        |       |        |      |
| ATOM       | 271 | O   | GLY |     | 22 | 38.206 | 5.650 | 16.215 | 1.00 |
| 89.87      |     |     | O   |     |    |        |       |        |      |
| ATOM       | 272 | HN  | GLY |     | 22 | 37.657 | 9.318 | 14.338 |      |
| 1.00214.64 |     |     |     | H   |    |        |       |        |      |
| ATOM       | 273 | HA1 | GLY |     | 22 | 38.191 | 7.066 | 13.819 |      |
| 1.00152.47 |     |     |     | H   |    |        |       |        |      |
| ATOM       | 274 | HA2 | GLY |     | 22 | 36.583 | 6.577 | 14.342 |      |
| 1.00118.15 |     |     |     | H   |    |        |       |        |      |
| ATOM       | 275 | N   | ASP |     | 23 | 38.244 | 7.830 | 16.765 | 1.00 |
| 44.68      |     |     | N   |     |    |        |       |        |      |
| ATOM       | 276 | CA  | ASP |     | 23 | 38.791 | 7.590 | 18.095 | 1.00 |
| 43.33      |     |     | C   |     |    |        |       |        |      |
| ATOM       | 277 | C   | ASP |     | 23 | 37.856 | 6.712 | 18.917 | 1.00 |
| 37.55      |     |     | C   |     |    |        |       |        |      |
| ATOM       | 278 | O   | ASP |     | 23 | 38.295 | 5.800 | 19.615 | 1.00 |
| 61.37      |     |     | O   |     |    |        |       |        |      |
| ATOM       | 279 | CB  | ASP |     | 23 | 39.002 | 8.921 | 18.816 | 1.00 |
| 40.74      |     |     | C   |     |    |        |       |        |      |
| ATOM       | 280 | CG  | ASP |     | 23 | 39.727 | 8.690 | 20.137 |      |
| 1.00141.86 |     |     |     | C   |    |        |       |        |      |
| ATOM       | 281 | OD1 | ASP |     | 23 | 40.139 | 9.666 | 20.743 |      |
| 1.00328.18 |     |     |     | O   |    |        |       |        |      |
| ATOM       | 282 | OD2 | ASP |     | 23 | 39.860 | 7.540 | 20.525 |      |
| 1.00304.58 |     |     |     | O1- |    |        |       |        |      |
| ATOM       | 283 | HN  | ASP |     | 23 | 38.062 | 8.747 | 16.478 | 1.00 |
| 40.86      |     |     | H   |     |    |        |       |        |      |
| ATOM       | 284 | HA  | ASP |     | 23 | 39.741 | 7.092 | 17.997 | 1.00 |
| 72.12      |     |     | H   |     |    |        |       |        |      |
| ATOM       | 285 | HB1 | ASP |     | 23 | 38.042 | 9.373 | 19.011 | 1.00 |
| 94.15      |     |     | H   |     |    |        |       |        |      |
| ATOM       | 286 | HB2 | ASP |     | 23 | 39.588 | 9.578 | 18.191 | 1.00 |
| 93.26      |     |     | H   |     |    |        |       |        |      |
| ATOM       | 287 | N   | MET |     | 24 | 36.563 | 7.001 | 18.832 | 1.00 |
| 23.24      |     |     | N   |     |    |        |       |        |      |
| ATOM       | 288 | CA  | MET |     | 24 | 35.565 | 6.238 | 19.576 | 1.00 |
| 32.50      |     |     | C   |     |    |        |       |        |      |
| ATOM       | 289 | C   | MET |     | 24 | 34.197 | 6.343 | 18.910 | 1.00 |
| 25.13      |     |     | C   |     |    |        |       |        |      |
| ATOM       | 290 | O   | MET |     | 24 | 33.982 | 7.186 | 18.039 | 1.00 |
| 54.40      |     |     | O   |     |    |        |       |        |      |
| ATOM       | 291 | CB  | MET |     | 24 | 35.476 | 6.760 | 21.013 | 1.00 |
| 47.36      |     |     | C   |     |    |        |       |        |      |
| ATOM       | 292 | CG  | MET |     | 24 | 34.978 | 8.208 | 21.006 |      |
| 1.00151.73 |     |     |     | C   |    |        |       |        |      |
| ATOM       | 293 | SD  | MET |     | 24 | 35.116 | 8.908 | 22.670 |      |

|            |     |      |     |   |    |        |        |        |      |
|------------|-----|------|-----|---|----|--------|--------|--------|------|
| 1.00209.23 |     |      |     | S |    |        |        |        |      |
| ATOM       | 294 | CE   | MET |   | 24 | 36.855 | 9.411  | 22.584 |      |
| 1.00243.29 |     |      |     | C |    |        |        |        |      |
| ATOM       | 295 | HN   | MET |   | 24 | 36.276 | 7.743  | 18.262 | 1.00 |
| 17.32      |     |      | H   |   |    |        |        |        |      |
| ATOM       | 296 | HA   | MET |   | 24 | 35.860 | 5.200  | 19.603 | 1.00 |
| 48.94      |     |      | H   |   |    |        |        |        |      |
| ATOM       | 297 | HB1  | MET |   | 24 | 36.452 | 6.718  | 21.472 |      |
| 1.00124.40 |     |      |     | H |    |        |        |        |      |
| ATOM       | 298 | HB2  | MET |   | 24 | 34.787 | 6.144  | 21.576 |      |
| 1.00166.96 |     |      |     | H |    |        |        |        |      |
| ATOM       | 299 | HG1  | MET |   | 24 | 33.945 | 8.230  | 20.691 |      |
| 1.00331.71 |     |      |     | H |    |        |        |        |      |
| ATOM       | 300 | HG2  | MET |   | 24 | 35.574 | 8.789  | 20.319 |      |
| 1.00302.30 |     |      |     | H |    |        |        |        |      |
| ATOM       | 301 | HE1  | MET |   | 24 | 37.366 | 8.831  | 21.828 |      |
| 1.00340.44 |     |      |     | H |    |        |        |        |      |
| ATOM       | 302 | HE2  | MET |   | 24 | 37.326 | 9.243  | 23.539 |      |
| 1.00373.88 |     |      |     | H |    |        |        |        |      |
| ATOM       | 303 | HE3  | MET |   | 24 | 36.913 | 10.462 | 22.339 |      |
| 1.00386.81 |     |      |     | H |    |        |        |        |      |
| ATOM       | 304 | N    | VAL |   | 25 | 33.272 | 5.477  | 19.329 | 1.00 |
| 22.44      |     |      | N   |   |    |        |        |        |      |
| ATOM       | 305 | CA   | VAL |   | 25 | 31.915 | 5.464  | 18.775 | 1.00 |
| 15.37      |     |      | C   |   |    |        |        |        |      |
| ATOM       | 306 | C    | VAL |   | 25 | 30.879 | 5.620  | 19.883 | 1.00 |
| 17.47      |     |      | C   |   |    |        |        |        |      |
| ATOM       | 307 | O    | VAL |   | 25 | 31.025 | 5.064  | 20.973 | 1.00 |
| 29.52      |     |      | O   |   |    |        |        |        |      |
| ATOM       | 308 | CB   | VAL |   | 25 | 31.664 | 4.154  | 18.021 | 1.00 |
| 23.36      |     |      | C   |   |    |        |        |        |      |
| ATOM       | 309 | CG1  | VAL |   | 25 | 30.193 | 4.083  | 17.579 | 1.00 |
| 58.39      |     |      | C   |   |    |        |        |        |      |
| ATOM       | 310 | CG2  | VAL |   | 25 | 32.576 | 4.100  | 16.790 | 1.00 |
| 55.25      |     |      | C   |   |    |        |        |        |      |
| ATOM       | 311 | HN   | VAL |   | 25 | 33.508 | 4.831  | 20.027 | 1.00 |
| 48.11      |     |      | H   |   |    |        |        |        |      |
| ATOM       | 312 | HA   | VAL |   | 25 | 31.799 | 6.291  | 18.081 | 1.00 |
| 9.25       |     |      | H   |   |    |        |        |        |      |
| ATOM       | 313 | HB   | VAL |   | 25 | 31.884 | 3.319  | 18.671 | 1.00 |
| 52.45      |     |      | H   |   |    |        |        |        |      |
| ATOM       | 314 | HG11 | VAL |   | 25 | 29.854 | 5.067  | 17.286 |      |
| 1.00171.07 |     |      |     | H |    |        |        |        |      |
| ATOM       | 315 | HG12 | VAL |   | 25 | 29.590 | 3.731  | 18.401 |      |
| 1.00166.22 |     |      |     | H |    |        |        |        |      |
| ATOM       | 316 | HG13 | VAL |   | 25 | 30.094 | 3.404  | 16.744 |      |
| 1.00134.76 |     |      |     | H |    |        |        |        |      |
| ATOM       | 317 | HG21 | VAL |   | 25 | 33.600 | 3.972  | 17.107 |      |
| 1.00141.88 |     |      |     | H |    |        |        |        |      |
| ATOM       | 318 | HG22 | VAL |   | 25 | 32.484 | 5.021  | 16.233 |      |
| 1.00184.50 |     |      |     | H |    |        |        |        |      |
| ATOM       | 319 | HG23 | VAL |   | 25 | 32.287 | 3.270  | 16.164 |      |

|            |     |      |     |     |    |        |        |        |      |
|------------|-----|------|-----|-----|----|--------|--------|--------|------|
| 1.00133.90 |     |      |     | H   |    |        |        |        |      |
| ATOM       | 320 | N    | THR |     | 26 | 29.838 | 6.396  | 19.593 | 1.00 |
| 13.60      |     |      |     | N   |    |        |        |        |      |
| ATOM       | 321 | CA   | THR |     | 26 | 28.766 | 6.655  | 20.554 | 1.00 |
| 21.19      |     |      |     | C   |    |        |        |        |      |
| ATOM       | 322 | C    | THR |     | 26 | 27.464 | 5.985  | 20.120 | 1.00 |
| 16.55      |     |      |     | C   |    |        |        |        |      |
| ATOM       | 323 | O    | THR |     | 26 | 27.040 | 6.111  | 18.971 | 1.00 |
| 11.43      |     |      |     | O   |    |        |        |        |      |
| ATOM       | 324 | CB   | THR |     | 26 | 28.553 | 8.163  | 20.658 | 1.00 |
| 27.07      |     |      |     | C   |    |        |        |        |      |
| ATOM       | 325 | CG2  | THR |     | 26 | 27.372 | 8.460  | 21.584 | 1.00 |
| 44.39      |     |      |     | C   |    |        |        |        |      |
| ATOM       | 326 | OG1  | THR |     | 26 | 29.730 | 8.768  | 21.176 | 1.00 |
| 34.75      |     |      |     | O   |    |        |        |        |      |
| ATOM       | 327 | HN   | THR |     | 26 | 29.793 | 6.815  | 18.708 | 1.00 |
| 10.81      |     |      |     | H   |    |        |        |        |      |
| ATOM       | 328 | HA   | THR |     | 26 | 29.049 | 6.277  | 21.527 | 1.00 |
| 33.16      |     |      |     | H   |    |        |        |        |      |
| ATOM       | 329 | HB   | THR |     | 26 | 28.348 | 8.560  | 19.674 | 1.00 |
| 20.60      |     |      |     | H   |    |        |        |        |      |
| ATOM       | 330 | HG1  | THR |     | 26 | 29.722 | 8.660  | 22.130 | 1.00 |
| 77.72      |     |      |     | H   |    |        |        |        |      |
| ATOM       | 331 | HG21 | THR |     | 26 | 27.349 | 9.515  | 21.811 |      |
| 1.00126.99 |     |      |     | H   |    |        |        |        |      |
| ATOM       | 332 | HG22 | THR |     | 26 | 27.481 | 7.896  | 22.499 |      |
| 1.00108.32 |     |      |     | H   |    |        |        |        |      |
| ATOM       | 333 | HG23 | THR |     | 26 | 26.450 | 8.178  | 21.097 |      |
| 1.00151.99 |     |      |     | H   |    |        |        |        |      |
| ATOM       | 334 | N    | ARG |     | 27 | 26.830 | 5.274  | 21.056 | 1.00 |
| 22.38      |     |      |     | N   |    |        |        |        |      |
| ATOM       | 335 | CA   | ARG |     | 27 | 25.567 | 4.581  | 20.785 | 1.00 |
| 20.21      |     |      |     | C   |    |        |        |        |      |
| ATOM       | 336 | C    | ARG |     | 27 | 24.560 | 4.878  | 21.894 | 1.00 |
| 16.96      |     |      |     | C   |    |        |        |        |      |
| ATOM       | 337 | O    | ARG |     | 27 | 24.942 | 5.057  | 23.050 | 1.00 |
| 20.06      |     |      |     | O   |    |        |        |        |      |
| ATOM       | 338 | CB   | ARG |     | 27 | 25.808 | 3.071  | 20.715 | 1.00 |
| 22.14      |     |      |     | C   |    |        |        |        |      |
| ATOM       | 339 | CG   | ARG |     | 27 | 26.780 | 2.759  | 19.575 |      |
| 1.00124.30 |     |      |     | C   |    |        |        |        |      |
| ATOM       | 340 | CD   | ARG |     | 27 | 27.093 | 1.261  | 19.571 |      |
| 1.00109.38 |     |      |     | C   |    |        |        |        |      |
| ATOM       | 341 | NE   | ARG |     | 27 | 25.893 | 0.495  | 19.254 |      |
| 1.00227.73 |     |      |     | N   |    |        |        |        |      |
| ATOM       | 342 | CZ   | ARG |     | 27 | 25.505 | 0.311  | 17.996 |      |
| 1.00426.12 |     |      |     | C   |    |        |        |        |      |
| ATOM       | 343 | NH1  | ARG |     | 27 | 24.423 | -0.371 | 17.739 |      |
| 1.00767.09 |     |      |     | N1+ |    |        |        |        |      |
| ATOM       | 344 | NH2  | ARG |     | 27 | 26.208 | 0.812  | 17.017 |      |
| 1.00581.78 |     |      |     | N   |    |        |        |        |      |
| ATOM       | 345 | HN   | ARG |     | 27 | 27.220 | 5.217  | 21.954 | 1.00 |

|            |     |      |     |    |        |        |        |      |  |
|------------|-----|------|-----|----|--------|--------|--------|------|--|
| 30.75      |     |      | H   |    |        |        |        |      |  |
| ATOM       | 346 | HA   | ARG | 27 | 25.161 | 4.917  | 19.842 | 1.00 |  |
| 23.13      |     |      | H   |    |        |        |        |      |  |
| ATOM       | 347 | HB1  | ARG | 27 | 24.872 | 2.565  | 20.536 | 1.00 |  |
| 87.46      |     |      | H   |    |        |        |        |      |  |
| ATOM       | 348 | HB2  | ARG | 27 | 26.228 | 2.730  | 21.650 |      |  |
| 1.00103.36 |     |      |     | H  |        |        |        |      |  |
| ATOM       | 349 | HG1  | ARG | 27 | 27.693 | 3.316  | 19.718 |      |  |
| 1.00281.97 |     |      |     | H  |        |        |        |      |  |
| ATOM       | 350 | HG2  | ARG | 27 | 26.330 | 3.036  | 18.633 |      |  |
| 1.00276.19 |     |      |     | H  |        |        |        |      |  |
| ATOM       | 351 | HD1  | ARG | 27 | 27.458 | 0.971  | 20.547 |      |  |
| 1.00183.60 |     |      |     | H  |        |        |        |      |  |
| ATOM       | 352 | HD2  | ARG | 27 | 27.854 | 1.058  | 18.833 |      |  |
| 1.00142.93 |     |      |     | H  |        |        |        |      |  |
| ATOM       | 353 | HE   | ARG | 27 | 25.361 | 0.109  | 19.981 |      |  |
| 1.00372.53 |     |      |     | H  |        |        |        |      |  |
| ATOM       | 354 | HH11 | ARG | 27 | 23.886 | -0.757 | 18.488 |      |  |
| 1.00910.59 |     |      |     | H  |        |        |        |      |  |
| ATOM       | 355 | HH12 | ARG | 27 | 24.131 | -0.510 | 16.792 |      |  |
| 1.00999.99 |     |      |     | H  |        |        |        |      |  |
| ATOM       | 356 | HH21 | ARG | 27 | 27.040 | 1.333  | 17.213 |      |  |
| 1.00532.54 |     |      |     | H  |        |        |        |      |  |
| ATOM       | 357 | HH22 | ARG | 27 | 25.917 | 0.674  | 16.070 |      |  |
| 1.00948.84 |     |      |     | H  |        |        |        |      |  |
| ATOM       | 358 | N    | SER | 28 | 23.270 | 4.935  | 21.544 | 1.00 |  |
| 14.60      |     |      | N   |    |        |        |        |      |  |
| ATOM       | 359 | CA   | SER | 28 | 22.230 | 5.216  | 22.538 | 1.00 |  |
| 14.92      |     |      | C   |    |        |        |        |      |  |
| ATOM       | 360 | C    | SER | 28 | 21.025 | 4.305  | 22.331 | 1.00 |  |
| 12.12      |     |      | C   |    |        |        |        |      |  |
| ATOM       | 361 | O    | SER | 28 | 20.691 | 3.943  | 21.204 | 1.00 |  |
| 13.41      |     |      | O   |    |        |        |        |      |  |
| ATOM       | 362 | CB   | SER | 28 | 21.796 | 6.678  | 22.435 | 1.00 |  |
| 23.26      |     |      | C   |    |        |        |        |      |  |
| ATOM       | 363 | OG   | SER | 28 | 22.896 | 7.519  | 22.751 |      |  |
| 1.00146.32 |     |      |     | O  |        |        |        |      |  |
| ATOM       | 364 | HN   | SER | 28 | 23.010 | 4.786  | 20.606 | 1.00 |  |
| 15.23      |     |      | H   |    |        |        |        |      |  |
| ATOM       | 365 | HA   | SER | 28 | 22.625 | 5.044  | 23.530 | 1.00 |  |
| 15.44      |     |      | H   |    |        |        |        |      |  |
| ATOM       | 366 | HB1  | SER | 28 | 20.980 | 6.860  | 23.123 | 1.00 |  |
| 88.73      |     |      | H   |    |        |        |        |      |  |
| ATOM       | 367 | HB2  | SER | 28 | 21.467 | 6.888  | 21.432 |      |  |
| 1.00124.68 |     |      |     | H  |        |        |        |      |  |
| ATOM       | 368 | HG   | SER | 28 | 22.550 | 8.361  | 23.051 |      |  |
| 1.00242.47 |     |      |     | H  |        |        |        |      |  |
| ATOM       | 369 | N    | CYS | 29 | 20.373 | 3.948  | 23.433 | 1.00 |  |
| 10.48      |     |      | N   |    |        |        |        |      |  |
| ATOM       | 370 | CA   | CYS | 29 | 19.197 | 3.089  | 23.380 | 1.00 |  |
| 9.97       |     |      | C   |    |        |        |        |      |  |
| ATOM       | 371 | C    | CYS | 29 | 18.597 | 2.956  | 24.777 | 1.00 |  |

|            |     |     |     |    |        |       |        |      |  |
|------------|-----|-----|-----|----|--------|-------|--------|------|--|
| 11.60      |     |     | C   |    |        |       |        |      |  |
| ATOM       | 372 | O   | CYS | 29 | 19.248 | 2.456 | 25.695 | 1.00 |  |
| 15.64      |     |     | O   |    |        |       |        |      |  |
| ATOM       | 373 | CB  | CYS | 29 | 19.564 | 1.701 | 22.819 | 1.00 |  |
| 9.52       |     |     | C   |    |        |       |        |      |  |
| ATOM       | 374 | SG  | CYS | 29 | 18.163 | 1.033 | 21.904 | 1.00 |  |
| 10.40      |     |     | S   |    |        |       |        |      |  |
| ATOM       | 375 | HN  | CYS | 29 | 20.683 | 4.282 | 24.301 | 1.00 |  |
| 11.10      |     |     | H   |    |        |       |        |      |  |
| ATOM       | 376 | HA  | CYS | 29 | 18.466 | 3.548 | 22.732 | 1.00 |  |
| 11.08      |     |     | H   |    |        |       |        |      |  |
| ATOM       | 377 | HB1 | CYS | 29 | 19.807 | 1.022 | 23.625 | 1.00 |  |
| 9.33       |     |     | H   |    |        |       |        |      |  |
| ATOM       | 378 | HB2 | CYS | 29 | 20.410 | 1.786 | 22.158 | 1.00 |  |
| 10.78      |     |     | H   |    |        |       |        |      |  |
| ATOM       | 379 | N   | GLU | 30 | 17.364 | 3.418 | 24.937 | 1.00 |  |
| 13.52      |     |     | N   |    |        |       |        |      |  |
| ATOM       | 380 | CA  | GLU | 30 | 16.694 | 3.358 | 26.233 | 1.00 |  |
| 17.41      |     |     | C   |    |        |       |        |      |  |
| ATOM       | 381 | C   | GLU | 30 | 16.055 | 1.994 | 26.460 | 1.00 |  |
| 10.81      |     |     | C   |    |        |       |        |      |  |
| ATOM       | 382 | O   | GLU | 30 | 15.735 | 1.279 | 25.511 | 1.00 |  |
| 23.22      |     |     | O   |    |        |       |        |      |  |
| ATOM       | 383 | CB  | GLU | 30 | 15.626 | 4.446 | 26.304 | 1.00 |  |
| 37.83      |     |     | C   |    |        |       |        |      |  |
| ATOM       | 384 | CG  | GLU | 30 | 16.296 | 5.817 | 26.202 |      |  |
| 1.00108.13 |     |     | C   |    |        |       |        |      |  |
| ATOM       | 385 | CD  | GLU | 30 | 17.091 | 6.105 | 27.471 |      |  |
| 1.00240.52 |     |     | C   |    |        |       |        |      |  |
| ATOM       | 386 | OE1 | GLU | 30 | 16.873 | 5.415 | 28.451 |      |  |
| 1.00422.56 |     |     | O   |    |        |       |        |      |  |
| ATOM       | 387 | OE2 | GLU | 30 | 17.906 | 7.012 | 27.442 |      |  |
| 1.00410.81 |     |     | O1- |    |        |       |        |      |  |
| ATOM       | 388 | HN  | GLU | 30 | 16.894 | 3.816 | 24.171 | 1.00 |  |
| 15.61      |     |     | H   |    |        |       |        |      |  |
| ATOM       | 389 | HA  | GLU | 30 | 17.420 | 3.536 | 27.012 | 1.00 |  |
| 24.60      |     |     | H   |    |        |       |        |      |  |
| ATOM       | 390 | HB1 | GLU | 30 | 15.095 | 4.374 | 27.241 | 1.00 |  |
| 72.67      |     |     | H   |    |        |       |        |      |  |
| ATOM       | 391 | HB2 | GLU | 30 | 14.935 | 4.321 | 25.484 | 1.00 |  |
| 56.47      |     |     | H   |    |        |       |        |      |  |
| ATOM       | 392 | HG1 | GLU | 30 | 15.541 | 6.578 | 26.071 |      |  |
| 1.00196.66 |     |     | H   |    |        |       |        |      |  |
| ATOM       | 393 | HG2 | GLU | 30 | 16.963 | 5.823 | 25.352 |      |  |
| 1.00140.67 |     |     | H   |    |        |       |        |      |  |
| ATOM       | 394 | N   | LYS | 31 | 15.866 | 1.643 | 27.732 | 1.00 |  |
| 11.96      |     |     | N   |    |        |       |        |      |  |
| ATOM       | 395 | CA  | LYS | 31 | 15.254 | 0.365 | 28.101 | 1.00 |  |
| 11.40      |     |     | C   |    |        |       |        |      |  |
| ATOM       | 396 | C   | LYS | 31 | 13.962 | 0.612 | 28.868 | 1.00 |  |
| 10.99      |     |     | C   |    |        |       |        |      |  |
| ATOM       | 397 | O   | LYS | 31 | 13.861 | 1.567 | 29.638 | 1.00 |  |



|            |     |     |     |    |        |        |        |      |  |
|------------|-----|-----|-----|----|--------|--------|--------|------|--|
| 12.86      |     |     | O   |    |        |        |        |      |  |
| ATOM       | 398 | CB  | LYS | 31 | 16.218 | -0.439 | 28.975 | 1.00 |  |
| 21.40      |     |     | C   |    |        |        |        |      |  |
| ATOM       | 399 | CG  | LYS | 31 | 17.479 | -0.775 | 28.175 | 1.00 |  |
| 57.81      |     |     | C   |    |        |        |        |      |  |
| ATOM       | 400 | CD  | LYS | 31 | 18.440 | -1.579 | 29.050 |      |  |
| 1.00115.52 |     |     | C   |    |        |        |        |      |  |
| ATOM       | 401 | CE  | LYS | 31 | 19.702 | -1.911 | 28.253 |      |  |
| 1.00250.23 |     |     | C   |    |        |        |        |      |  |
| ATOM       | 402 | NZ  | LYS | 31 | 20.644 | -2.685 | 29.111 |      |  |
| 1.00462.10 |     |     | N1+ |    |        |        |        |      |  |
| ATOM       | 403 | HN  | LYS | 31 | 16.140 | 2.262  | 28.441 | 1.00 |  |
| 26.13      |     |     | H   |    |        |        |        |      |  |
| ATOM       | 404 | HA  | LYS | 31 | 15.030 | -0.206 | 27.210 | 1.00 |  |
| 13.87      |     |     | H   |    |        |        |        |      |  |
| ATOM       | 405 | HB1 | LYS | 31 | 15.741 | -1.354 | 29.290 | 1.00 |  |
| 37.63      |     |     | H   |    |        |        |        |      |  |
| ATOM       | 406 | HB2 | LYS | 31 | 16.488 | 0.144  | 29.844 | 1.00 |  |
| 47.19      |     |     | H   |    |        |        |        |      |  |
| ATOM       | 407 | HG1 | LYS | 31 | 17.960 | 0.139  | 27.859 |      |  |
| 1.00126.32 |     |     | H   |    |        |        |        |      |  |
| ATOM       | 408 | HG2 | LYS | 31 | 17.207 | -1.358 | 27.305 |      |  |
| 1.00114.19 |     |     | H   |    |        |        |        |      |  |
| ATOM       | 409 | HD1 | LYS | 31 | 17.964 | -2.494 | 29.363 |      |  |
| 1.00198.45 |     |     | H   |    |        |        |        |      |  |
| ATOM       | 410 | HD2 | LYS | 31 | 18.707 | -0.995 | 29.921 |      |  |
| 1.00200.14 |     |     | H   |    |        |        |        |      |  |
| ATOM       | 411 | HE1 | LYS | 31 | 20.177 | -0.995 | 27.933 |      |  |
| 1.00374.64 |     |     | H   |    |        |        |        |      |  |
| ATOM       | 412 | HE2 | LYS | 31 | 19.437 | -2.501 | 27.387 |      |  |
| 1.00403.27 |     |     | H   |    |        |        |        |      |  |
| ATOM       | 413 | HZ1 | LYS | 31 | 20.554 | -3.698 | 28.897 |      |  |
| 1.00627.38 |     |     | H   |    |        |        |        |      |  |
| ATOM       | 414 | HZ2 | LYS | 31 | 20.416 | -2.519 | 30.113 |      |  |
| 1.00622.26 |     |     | H   |    |        |        |        |      |  |
| ATOM       | 415 | HZ3 | LYS | 31 | 21.618 | -2.379 | 28.922 |      |  |
| 1.00619.20 |     |     | H   |    |        |        |        |      |  |
| ATOM       | 416 | N   | THR | 32 | 12.971 | -0.247 | 28.651 | 1.00 |  |
| 15.51      |     |     | N   |    |        |        |        |      |  |
| ATOM       | 417 | CA  | THR | 32 | 11.687 | -0.099 | 29.326 | 1.00 |  |
| 22.44      |     |     | C   |    |        |        |        |      |  |
| ATOM       | 418 | C   | THR | 32 | 11.759 | -0.646 | 30.748 | 1.00 |  |
| 26.60      |     |     | C   |    |        |        |        |      |  |
| ATOM       | 419 | O   | THR | 32 | 12.105 | -1.807 | 30.964 | 1.00 |  |
| 57.43      |     |     | O   |    |        |        |        |      |  |
| ATOM       | 420 | CB  | THR | 32 | 10.597 | -0.837 | 28.546 | 1.00 |  |
| 56.28      |     |     | C   |    |        |        |        |      |  |
| ATOM       | 421 | CG2 | THR | 32 | 9.257  | -0.685 | 29.270 |      |  |
| 1.00102.70 |     |     | C   |    |        |        |        |      |  |
| ATOM       | 422 | OG1 | THR | 32 | 10.497 | -0.288 | 27.240 |      |  |
| 1.00111.17 |     |     | O   |    |        |        |        |      |  |
| ATOM       | 423 | HN  | THR | 32 | 13.105 | -0.987 | 28.022 | 1.00 |  |

|            |     |      |     |    |        |        |        |      |  |
|------------|-----|------|-----|----|--------|--------|--------|------|--|
| 18.79      |     |      | H   |    |        |        |        |      |  |
| ATOM       | 424 | HA   | THR | 32 | 11.432 | 0.950  | 29.369 | 1.00 |  |
| 19.67      |     |      | H   |    |        |        |        |      |  |
| ATOM       | 425 | HB   | THR | 32 | 10.848 | -1.883 | 28.479 | 1.00 |  |
| 84.25      |     |      | H   |    |        |        |        |      |  |
| ATOM       | 426 | HG1  | THR | 32 | 11.076 | -0.791 | 26.662 |      |  |
| 1.00205.03 |     |      |     | H  |        |        |        |      |  |
| ATOM       | 427 | HG21 | THR | 32 | 9.093  | 0.355  | 29.508 |      |  |
| 1.00220.71 |     |      |     | H  |        |        |        |      |  |
| ATOM       | 428 | HG22 | THR | 32 | 9.273  | -1.265 | 30.181 |      |  |
| 1.00174.67 |     |      |     | H  |        |        |        |      |  |
| ATOM       | 429 | HG23 | THR | 32 | 8.461  | -1.040 | 28.632 |      |  |
| 1.00217.44 |     |      |     | H  |        |        |        |      |  |
| ATOM       | 430 | N    | THR | 33 | 11.423 | 0.204  | 31.715 | 1.00 |  |
| 22.47      |     |      | N   |    |        |        |        |      |  |
| ATOM       | 431 | CA   | THR | 33 | 11.444 | -0.188 | 33.120 | 1.00 |  |
| 41.60      |     |      | C   |    |        |        |        |      |  |
| ATOM       | 432 | C    | THR | 33 | 10.458 | 0.630  | 33.907 | 1.00 |  |
| 38.03      |     |      | C   |    |        |        |        |      |  |
| ATOM       | 433 | O    | THR | 33 | 10.789 | 1.686  | 34.449 | 1.00 |  |
| 52.73      |     |      | O   |    |        |        |        |      |  |
| ATOM       | 434 | CB   | THR | 33 | 12.848 | -0.018 | 33.706 | 1.00 |  |
| 63.25      |     |      | C   |    |        |        |        |      |  |
| ATOM       | 435 | CG2  | THR | 33 | 13.795 | -1.050 | 33.091 |      |  |
| 1.00121.65 |     |      |     | C  |        |        |        |      |  |
| ATOM       | 436 | OG1  | THR | 33 | 13.322 | 1.290  | 33.424 | 1.00 |  |
| 96.20      |     |      | O   |    |        |        |        |      |  |
| ATOM       | 437 | HN   | THR | 33 | 11.154 | 1.116  | 31.477 | 1.00 |  |
| 23.82      |     |      | H   |    |        |        |        |      |  |
| ATOM       | 438 | HA   | THR | 33 | 11.145 | -1.214 | 33.214 | 1.00 |  |
| 67.12      |     |      | H   |    |        |        |        |      |  |
| ATOM       | 439 | HB   | THR | 33 | 12.810 | -0.163 | 34.775 |      |  |
| 1.00107.59 |     |      |     | H  |        |        |        |      |  |
| ATOM       | 440 | HG1  | THR | 33 | 13.960 | 1.227  | 32.707 |      |  |
| 1.00176.27 |     |      |     | H  |        |        |        |      |  |
| ATOM       | 441 | HG21 | THR | 33 | 13.334 | -2.026 | 33.121 |      |  |
| 1.00255.23 |     |      |     | H  |        |        |        |      |  |
| ATOM       | 442 | HG22 | THR | 33 | 14.718 | -1.072 | 33.653 |      |  |
| 1.00245.37 |     |      |     | H  |        |        |        |      |  |
| ATOM       | 443 | HG23 | THR | 33 | 14.005 | -0.782 | 32.067 |      |  |
| 1.00185.78 |     |      |     | H  |        |        |        |      |  |
| ATOM       | 444 | N    | GLY | 34 | 9.242  | 0.121  | 33.979 | 1.00 |  |
| 40.93      |     |      | N   |    |        |        |        |      |  |
| ATOM       | 445 | CA   | GLY | 34 | 8.207  | 0.798  | 34.717 | 1.00 |  |
| 45.59      |     |      | C   |    |        |        |        |      |  |
| ATOM       | 446 | C    | GLY | 34 | 7.745  | 2.048  | 33.978 | 1.00 |  |
| 40.97      |     |      | C   |    |        |        |        |      |  |
| ATOM       | 447 | O    | GLY | 34 | 6.550  | 2.333  | 33.906 | 1.00 |  |
| 82.17      |     |      | O   |    |        |        |        |      |  |
| ATOM       | 448 | HN   | GLY | 34 | 9.043  | -0.730 | 33.535 | 1.00 |  |
| 54.00      |     |      | H   |    |        |        |        |      |  |
| ATOM       | 449 | HA1  | GLY | 34 | 8.613  | 1.074  | 35.670 | 1.00 |  |

|            |     |      |     |    |        |       |        |      |  |
|------------|-----|------|-----|----|--------|-------|--------|------|--|
| 54.41      |     |      | H   |    |        |       |        |      |  |
| ATOM       | 450 | HA2  | GLY | 34 | 7.370  | 0.129 | 34.861 | 1.00 |  |
| 62.09      |     |      | H   |    |        |       |        |      |  |
| ATOM       | 451 | N    | ASN | 35 | 8.704  | 2.785 | 33.421 | 1.00 |  |
| 32.51      |     |      | N   |    |        |       |        |      |  |
| ATOM       | 452 | CA   | ASN | 35 | 8.405  | 4.007 | 32.670 | 1.00 |  |
| 33.20      |     |      | C   |    |        |       |        |      |  |
| ATOM       | 453 | C    | ASN | 35 | 9.197  | 4.028 | 31.368 | 1.00 |  |
| 23.17      |     |      | C   |    |        |       |        |      |  |
| ATOM       | 454 | O    | ASN | 35 | 10.364 | 3.638 | 31.335 | 1.00 |  |
| 27.01      |     |      | O   |    |        |       |        |      |  |
| ATOM       | 455 | CB   | ASN | 35 | 8.763  | 5.236 | 33.504 | 1.00 |  |
| 54.51      |     |      | C   |    |        |       |        |      |  |
| ATOM       | 456 | CG   | ASN | 35 | 7.955  | 5.243 | 34.797 | 1.00 |  |
| 80.73      |     |      | C   |    |        |       |        |      |  |
| ATOM       | 457 | ND2  | ASN | 35 | 8.543  | 5.551 | 35.921 |      |  |
| 1.00220.46 |     |      |     | N  |        |       |        |      |  |
| ATOM       | 458 | OD1  | ASN | 35 | 6.757  | 4.959 | 34.783 |      |  |
| 1.00117.80 |     |      |     | O  |        |       |        |      |  |
| ATOM       | 459 | HN   | ASN | 35 | 9.638  | 2.498 | 33.509 | 1.00 |  |
| 51.15      |     |      | H   |    |        |       |        |      |  |
| ATOM       | 460 | HA   | ASN | 35 | 7.350  | 4.038 | 32.435 | 1.00 |  |
| 47.21      |     |      | H   |    |        |       |        |      |  |
| ATOM       | 461 | HB1  | ASN | 35 | 8.539  | 6.128 | 32.939 | 1.00 |  |
| 68.31      |     |      | H   |    |        |       |        |      |  |
| ATOM       | 462 | HB2  | ASN | 35 | 9.816  | 5.215 | 33.738 | 1.00 |  |
| 57.75      |     |      | H   |    |        |       |        |      |  |
| ATOM       | 463 | HD21 | ASN | 35 | 9.495  | 5.774 | 35.930 |      |  |
| 1.00405.39 |     |      |     | H  |        |       |        |      |  |
| ATOM       | 464 | HD22 | ASN | 35 | 8.030  | 5.556 | 36.757 |      |  |
| 1.00245.64 |     |      |     | H  |        |       |        |      |  |
| ATOM       | 465 | N    | PHE | 36 | 8.555  | 4.477 | 30.295 | 1.00 |  |
| 35.72      |     |      | N   |    |        |       |        |      |  |
| ATOM       | 466 | CA   | PHE | 36 | 9.199  | 4.537 | 28.993 | 1.00 |  |
| 33.41      |     |      | C   |    |        |       |        |      |  |
| ATOM       | 467 | C    | PHE | 36 | 10.018 | 5.818 | 28.850 | 1.00 |  |
| 28.51      |     |      | C   |    |        |       |        |      |  |
| ATOM       | 468 | O    | PHE | 36 | 9.662  | 6.860 | 29.400 | 1.00 |  |
| 45.23      |     |      | O   |    |        |       |        |      |  |
| ATOM       | 469 | CB   | PHE | 36 | 8.129  | 4.485 | 27.907 | 1.00 |  |
| 67.53      |     |      | C   |    |        |       |        |      |  |
| ATOM       | 470 | CG   | PHE | 36 | 7.459  | 3.132 | 27.935 | 1.00 |  |
| 86.71      |     |      | C   |    |        |       |        |      |  |
| ATOM       | 471 | CD1  | PHE | 36 | 6.344  | 2.925 | 28.757 |      |  |
| 1.00106.51 |     |      |     | C  |        |       |        |      |  |
| ATOM       | 472 | CD2  | PHE | 36 | 7.947  | 2.087 | 27.142 | 1.00 |  |
| 99.48      |     |      | C   |    |        |       |        |      |  |
| ATOM       | 473 | CE1  | PHE | 36 | 5.719  | 1.672 | 28.785 |      |  |
| 1.00134.48 |     |      |     | C  |        |       |        |      |  |
| ATOM       | 474 | CE2  | PHE | 36 | 7.322  | 0.835 | 27.171 |      |  |
| 1.00134.27 |     |      |     | C  |        |       |        |      |  |
| ATOM       | 475 | CZ   | PHE | 36 | 6.208  | 0.627 | 27.992 |      |  |

|            |     |      |     |    |        |        |        |      |  |
|------------|-----|------|-----|----|--------|--------|--------|------|--|
| 1.00149.48 |     |      |     | C  |        |        |        |      |  |
| ATOM       | 476 | HN   | PHE | 36 | 7.625  | 4.768  | 30.376 | 1.00 |  |
| 62.87      |     |      | H   |    |        |        |        |      |  |
| ATOM       | 477 | HA   | PHE | 36 | 9.853  | 3.685  | 28.879 | 1.00 |  |
| 28.53      |     |      | H   |    |        |        |        |      |  |
| ATOM       | 478 | HB1  | PHE | 36 | 8.586  | 4.639  | 26.948 | 1.00 |  |
| 73.56      |     |      | H   |    |        |        |        |      |  |
| ATOM       | 479 | HB2  | PHE | 36 | 7.395  | 5.256  | 28.087 | 1.00 |  |
| 88.42      |     |      | H   |    |        |        |        |      |  |
| ATOM       | 480 | HD1  | PHE | 36 | 5.967  | 3.731  | 29.371 |      |  |
| 1.00110.20 |     |      |     | H  |        |        |        |      |  |
| ATOM       | 481 | HD2  | PHE | 36 | 8.809  | 2.247  | 26.510 | 1.00 |  |
| 93.07      |     |      | H   |    |        |        |        |      |  |
| ATOM       | 482 | HE1  | PHE | 36 | 4.859  | 1.512  | 29.420 |      |  |
| 1.00155.06 |     |      |     | H  |        |        |        |      |  |
| ATOM       | 483 | HE2  | PHE | 36 | 7.699  | 0.029  | 26.559 |      |  |
| 1.00159.46 |     |      |     | H  |        |        |        |      |  |
| ATOM       | 484 | HZ   | PHE | 36 | 5.726  | -0.338 | 28.015 |      |  |
| 1.00183.25 |     |      |     | H  |        |        |        |      |  |
| ATOM       | 485 | N    | THR | 37 | 11.117 | 5.729  | 28.103 | 1.00 |  |
| 20.06      |     |      | N   |    |        |        |        |      |  |
| ATOM       | 486 | CA   | THR | 37 | 11.989 | 6.877  | 27.878 | 1.00 |  |
| 27.18      |     |      | C   |    |        |        |        |      |  |
| ATOM       | 487 | C    | THR | 37 | 12.604 | 6.796  | 26.486 | 1.00 |  |
| 41.87      |     |      | C   |    |        |        |        |      |  |
| ATOM       | 488 | O    | THR | 37 | 13.304 | 5.841  | 26.161 |      |  |
| 1.00169.86 |     |      |     | O  |        |        |        |      |  |
| ATOM       | 489 | CB   | THR | 37 | 13.101 | 6.904  | 28.929 | 1.00 |  |
| 26.52      |     |      | C   |    |        |        |        |      |  |
| ATOM       | 490 | CG2  | THR | 37 | 12.485 | 7.026  | 30.324 | 1.00 |  |
| 75.69      |     |      | C   |    |        |        |        |      |  |
| ATOM       | 491 | OG1  | THR | 37 | 13.857 | 5.703  | 28.847 | 1.00 |  |
| 81.95      |     |      | O   |    |        |        |        |      |  |
| ATOM       | 492 | HN   | THR | 37 | 11.344 | 4.875  | 27.686 | 1.00 |  |
| 18.47      |     |      | H   |    |        |        |        |      |  |
| ATOM       | 493 | HA   | THR | 37 | 11.412 | 7.788  | 27.955 | 1.00 |  |
| 38.80      |     |      | H   |    |        |        |        |      |  |
| ATOM       | 494 | HB   | THR | 37 | 13.746 | 7.749  | 28.752 | 1.00 |  |
| 81.60      |     |      | H   |    |        |        |        |      |  |
| ATOM       | 495 | HG1  | THR | 37 | 14.764 | 5.939  | 28.637 |      |  |
| 1.00188.80 |     |      |     | H  |        |        |        |      |  |
| ATOM       | 496 | HG21 | THR | 37 | 12.047 | 6.079  | 30.609 |      |  |
| 1.00196.98 |     |      |     | H  |        |        |        |      |  |
| ATOM       | 497 | HG22 | THR | 37 | 11.719 | 7.786  | 30.315 |      |  |
| 1.00196.23 |     |      |     | H  |        |        |        |      |  |
| ATOM       | 498 | HG23 | THR | 37 | 13.251 | 7.295  | 31.035 |      |  |
| 1.00168.92 |     |      |     | H  |        |        |        |      |  |
| ATOM       | 499 | N    | GLU | 38 | 12.326 | 7.801  | 25.670 | 1.00 |  |
| 26.53      |     |      | N   |    |        |        |        |      |  |
| ATOM       | 500 | CA   | GLU | 38 | 12.846 | 7.837  | 24.305 | 1.00 |  |
| 30.29      |     |      | C   |    |        |        |        |      |  |
| ATOM       | 501 | C    | GLU | 38 | 14.336 | 8.173  | 24.292 | 1.00 |  |

|            |     |     |     |     |        |        |        |      |  |
|------------|-----|-----|-----|-----|--------|--------|--------|------|--|
| 25.39      |     |     | C   |     |        |        |        |      |  |
| ATOM       | 502 | O   | GLU | 38  | 14.860 | 8.759  | 25.239 | 1.00 |  |
| 51.60      |     |     | O   |     |        |        |        |      |  |
| ATOM       | 503 | CB  | GLU | 38  | 12.080 | 8.877  | 23.484 | 1.00 |  |
| 54.82      |     |     | C   |     |        |        |        |      |  |
| ATOM       | 504 | CG  | GLU | 38  | 10.635 | 8.409  | 23.290 |      |  |
| 1.00165.84 |     |     |     | C   |        |        |        |      |  |
| ATOM       | 505 | CD  | GLU | 38  | 9.837  | 9.475  | 22.548 |      |  |
| 1.00292.92 |     |     |     | C   |        |        |        |      |  |
| ATOM       | 506 | OE1 | GLU | 38  | 10.361 | 10.561 | 22.367 |      |  |
| 1.00414.19 |     |     |     | O   |        |        |        |      |  |
| ATOM       | 507 | OE2 | GLU | 38  | 8.712  | 9.191  | 22.173 |      |  |
| 1.00537.65 |     |     |     | O1- |        |        |        |      |  |
| ATOM       | 508 | HN  | GLU | 38  | 11.754 | 8.528  | 25.986 | 1.00 |  |
| 84.50      |     |     | H   |     |        |        |        |      |  |
| ATOM       | 509 | HA  | GLU | 38  | 12.704 | 6.867  | 23.853 | 1.00 |  |
| 32.15      |     |     | H   |     |        |        |        |      |  |
| ATOM       | 510 | HB1 | GLU | 38  | 12.551 | 8.993  | 22.520 |      |  |
| 1.00144.82 |     |     |     | H   |        |        |        |      |  |
| ATOM       | 511 | HB2 | GLU | 38  | 12.086 | 9.823  | 24.006 |      |  |
| 1.00106.49 |     |     |     | H   |        |        |        |      |  |
| ATOM       | 512 | HG1 | GLU | 38  | 10.184 | 8.230  | 24.253 |      |  |
| 1.00303.31 |     |     |     | H   |        |        |        |      |  |
| ATOM       | 513 | HG2 | GLU | 38  | 10.630 | 7.494  | 22.716 |      |  |
| 1.00323.99 |     |     |     | H   |        |        |        |      |  |
| ATOM       | 514 | N   | CYS | 39  | 15.008 | 7.801  | 23.205 | 1.00 |  |
| 15.84      |     |     | N   |     |        |        |        |      |  |
| ATOM       | 515 | CA  | CYS | 39  | 16.436 | 8.067  | 23.062 | 1.00 |  |
| 14.30      |     |     | C   |     |        |        |        |      |  |
| ATOM       | 516 | C   | CYS | 39  | 16.686 | 9.579  | 23.002 | 1.00 |  |
| 22.31      |     |     | C   |     |        |        |        |      |  |
| ATOM       | 517 | O   | CYS | 39  | 15.830 | 10.325 | 22.526 | 1.00 |  |
| 32.92      |     |     | O   |     |        |        |        |      |  |
| ATOM       | 518 | CB  | CYS | 39  | 16.953 | 7.403  | 21.782 | 1.00 |  |
| 18.08      |     |     | C   |     |        |        |        |      |  |
| ATOM       | 519 | SG  | CYS | 39  | 15.942 | 7.935  | 20.377 | 1.00 |  |
| 17.41      |     |     | S   |     |        |        |        |      |  |
| ATOM       | 520 | HN  | CYS | 39  | 14.533 | 7.343  | 22.482 | 1.00 |  |
| 24.87      |     |     | H   |     |        |        |        |      |  |
| ATOM       | 521 | HA  | CYS | 39  | 16.954 | 7.645  | 23.908 | 1.00 |  |
| 14.60      |     |     | H   |     |        |        |        |      |  |
| ATOM       | 522 | HB1 | CYS | 39  | 16.893 | 6.330  | 21.883 | 1.00 |  |
| 27.71      |     |     | H   |     |        |        |        |      |  |
| ATOM       | 523 | HB2 | CYS | 39  | 17.979 | 7.691  | 21.614 | 1.00 |  |
| 34.91      |     |     | H   |     |        |        |        |      |  |
| ATOM       | 524 | N   | PRO | 40  | 17.822 | 10.052 | 23.467 | 1.00 |  |
| 27.27      |     |     | N   |     |        |        |        |      |  |
| ATOM       | 525 | CA  | PRO | 40  | 18.142 | 11.509 | 23.446 | 1.00 |  |
| 47.66      |     |     | C   |     |        |        |        |      |  |
| ATOM       | 526 | C   | PRO | 40  | 18.523 | 11.992 | 22.049 | 1.00 |  |
| 71.54      |     |     | C   |     |        |        |        |      |  |
| ATOM       | 527 | O   | PRO | 40  | 19.250 | 11.315 | 21.321 | 1.00 |  |

|            |     |     |     |    |        |        |        |      |
|------------|-----|-----|-----|----|--------|--------|--------|------|
| 87.70      |     |     | O   |    |        |        |        |      |
| ATOM       | 528 | CB  | PRO | 40 | 19.320 | 11.625 | 24.418 | 1.00 |
| 53.85      |     |     | C   |    |        |        |        |      |
| ATOM       | 529 | CG  | PRO | 40 | 20.022 | 10.312 | 24.308 | 1.00 |
| 46.04      |     |     | C   |    |        |        |        |      |
| ATOM       | 530 | CD  | PRO | 40 | 18.926 | 9.270  | 24.055 | 1.00 |
| 25.70      |     |     | C   |    |        |        |        |      |
| ATOM       | 531 | HA  | PRO | 40 | 17.306 | 12.078 | 23.821 | 1.00 |
| 58.04      |     |     | H   |    |        |        |        |      |
| ATOM       | 532 | HB1 | PRO | 40 | 18.962 | 11.769 | 25.429 | 1.00 |
| 67.93      |     |     | H   |    |        |        |        |      |
| ATOM       | 533 | HB2 | PRO | 40 | 19.976 | 12.438 | 24.131 | 1.00 |
| 70.99      |     |     | H   |    |        |        |        |      |
| ATOM       | 534 | HG1 | PRO | 40 | 20.542 | 10.083 | 25.227 | 1.00 |
| 65.91      |     |     | H   |    |        |        |        |      |
| ATOM       | 535 | HG2 | PRO | 40 | 20.721 | 10.335 | 23.479 | 1.00 |
| 54.99      |     |     | H   |    |        |        |        |      |
| ATOM       | 536 | HD1 | PRO | 40 | 18.612 | 8.817  | 24.981 | 1.00 |
| 24.22      |     |     | H   |    |        |        |        |      |
| ATOM       | 537 | HD2 | PRO | 40 | 19.273 | 8.521  | 23.359 | 1.00 |
| 26.94      |     |     | H   |    |        |        |        |      |
| ATOM       | 538 | N   | GLY | 41 | 18.034 | 13.169 | 21.691 |      |
| 1.00105.24 |     |     | N   |    |        |        |        |      |
| ATOM       | 539 | CA  | GLY | 41 | 18.329 | 13.748 | 20.386 |      |
| 1.00147.55 |     |     | C   |    |        |        |        |      |
| ATOM       | 540 | C   | GLY | 41 | 19.821 | 14.022 | 20.242 |      |
| 1.00161.74 |     |     | C   |    |        |        |        |      |
| ATOM       | 541 | O   | GLY | 41 | 20.408 | 13.802 | 19.183 |      |
| 1.00244.37 |     |     | O   |    |        |        |        |      |
| ATOM       | 542 | HN  | GLY | 41 | 17.467 | 13.660 | 22.319 |      |
| 1.00121.79 |     |     | H   |    |        |        |        |      |
| ATOM       | 543 | HA1 | GLY | 41 | 17.789 | 14.676 | 20.277 |      |
| 1.00184.40 |     |     | H   |    |        |        |        |      |
| ATOM       | 544 | HA2 | GLY | 41 | 18.020 | 13.061 | 19.615 |      |
| 1.00157.34 |     |     | H   |    |        |        |        |      |
| ATOM       | 545 | N   | LEU | 42 | 20.429 | 14.507 | 21.324 |      |
| 1.00162.48 |     |     | N   |    |        |        |        |      |
| ATOM       | 546 | CA  | LEU | 42 | 21.860 | 14.821 | 21.336 |      |
| 1.00191.48 |     |     | C   |    |        |        |        |      |
| ATOM       | 547 | C   | LEU | 42 | 22.600 | 13.875 | 22.275 |      |
| 1.00166.66 |     |     | C   |    |        |        |        |      |
| ATOM       | 548 | O   | LEU | 42 | 22.069 | 13.469 | 23.309 |      |
| 1.00251.38 |     |     | O   |    |        |        |        |      |
| ATOM       | 549 | CB  | LEU | 42 | 22.072 | 16.263 | 21.804 |      |
| 1.00307.99 |     |     | C   |    |        |        |        |      |
| ATOM       | 550 | CG  | LEU | 42 | 21.275 | 17.226 | 20.917 |      |
| 1.00452.28 |     |     | C   |    |        |        |        |      |
| ATOM       | 551 | CD1 | LEU | 42 | 21.449 | 18.654 | 21.442 |      |
| 1.00681.24 |     |     | C   |    |        |        |        |      |
| ATOM       | 552 | CD2 | LEU | 42 | 21.777 | 17.145 | 19.465 |      |
| 1.00527.46 |     |     | C   |    |        |        |        |      |
| ATOM       | 553 | HN  | LEU | 42 | 19.901 | 14.658 | 22.135 |      |

|            |     |      |     |    |        |        |        |  |
|------------|-----|------|-----|----|--------|--------|--------|--|
| 1.00195.47 |     |      |     | H  |        |        |        |  |
| ATOM       | 554 | HA   | LEU | 42 | 22.268 | 14.712 | 20.342 |  |
| 1.00229.77 |     |      |     | H  |        |        |        |  |
| ATOM       | 555 | HB1  | LEU | 42 | 23.121 | 16.510 | 21.743 |  |
| 1.00342.49 |     |      |     | H  |        |        |        |  |
| ATOM       | 556 | HB2  | LEU | 42 | 21.739 | 16.360 | 22.828 |  |
| 1.00335.33 |     |      |     | H  |        |        |        |  |
| ATOM       | 557 | HG   | LEU | 42 | 20.227 | 16.958 | 20.952 |  |
| 1.00427.79 |     |      |     | H  |        |        |        |  |
| ATOM       | 558 | HD11 | LEU | 42 | 20.766 | 19.314 | 20.926 |  |
| 1.00909.71 |     |      |     | H  |        |        |        |  |
| ATOM       | 559 | HD12 | LEU | 42 | 22.463 | 18.980 | 21.269 |  |
| 1.00706.80 |     |      |     | H  |        |        |        |  |
| ATOM       | 560 | HD13 | LEU | 42 | 21.239 | 18.676 | 22.501 |  |
| 1.00858.82 |     |      |     | H  |        |        |        |  |
| ATOM       | 561 | HD21 | LEU | 42 | 21.523 | 18.055 | 18.939 |  |
| 1.00631.69 |     |      |     | H  |        |        |        |  |
| ATOM       | 562 | HD22 | LEU | 42 | 21.311 | 16.308 | 18.968 |  |
| 1.00628.06 |     |      |     | H  |        |        |        |  |
| ATOM       | 563 | HD23 | LEU | 42 | 22.851 | 17.016 | 19.457 |  |
| 1.00656.75 |     |      |     | H  |        |        |        |  |
| ATOM       | 564 | N    | THR | 43 | 23.830 | 13.526 | 21.909 |  |
| 1.00178.52 |     |      |     | N  |        |        |        |  |
| ATOM       | 565 | CA   | THR | 43 | 24.632 | 12.624 | 22.727 |  |
| 1.00240.84 |     |      |     | C  |        |        |        |  |
| ATOM       | 566 | C    | THR | 43 | 25.043 | 13.314 | 24.036 |  |
| 1.00372.31 |     |      |     | C  |        |        |        |  |
| ATOM       | 567 | O    | THR | 43 | 25.211 | 14.532 | 24.066 |  |
| 1.00500.13 |     |      |     | O  |        |        |        |  |
| ATOM       | 568 | CB   | THR | 43 | 25.880 | 12.206 | 21.944 |  |
| 1.00354.13 |     |      |     | C  |        |        |        |  |
| ATOM       | 569 | CG2  | THR | 43 | 25.462 | 11.451 | 20.682 |  |
| 1.00463.04 |     |      |     | C  |        |        |        |  |
| ATOM       | 570 | OG1  | THR | 43 | 26.618 | 13.365 | 21.581 |  |
| 1.00508.50 |     |      |     | O  |        |        |        |  |
| ATOM       | 571 | HN   | THR | 43 | 24.202 | 13.880 | 21.074 |  |
| 1.00229.59 |     |      |     | H  |        |        |        |  |
| ATOM       | 572 | HA   | THR | 43 | 24.046 | 11.747 | 22.945 |  |
| 1.00249.90 |     |      |     | H  |        |        |        |  |
| ATOM       | 573 | HB   | THR | 43 | 26.496 | 11.566 | 22.554 |  |
| 1.00481.58 |     |      |     | H  |        |        |        |  |
| ATOM       | 574 | HG1  | THR | 43 | 26.511 | 14.015 | 22.280 |  |
| 1.00624.31 |     |      |     | H  |        |        |        |  |
| ATOM       | 575 | HG21 | THR | 43 | 24.949 | 12.124 | 20.011 |  |
| 1.00650.95 |     |      |     | H  |        |        |        |  |
| ATOM       | 576 | HG22 | THR | 43 | 24.803 | 10.638 | 20.950 |  |
| 1.00580.73 |     |      |     | H  |        |        |        |  |
| ATOM       | 577 | HG23 | THR | 43 | 26.339 | 11.055 | 20.191 |  |
| 1.00571.99 |     |      |     | H  |        |        |        |  |
| ATOM       | 578 | N    | PRO | 44 | 25.207 | 12.574 | 25.114 |  |
| 1.00488.39 |     |      |     | N  |        |        |        |  |
| ATOM       | 579 | CA   | PRO | 44 | 25.604 | 13.156 | 26.432 |  |

|            |     |      |     |    |        |        |        |  |
|------------|-----|------|-----|----|--------|--------|--------|--|
| 1.00760.13 |     |      |     | C  |        |        |        |  |
| ATOM       | 580 | C    | PRO | 44 | 27.082 | 13.549 | 26.471 |  |
| 1.00735.36 |     |      |     | C  |        |        |        |  |
| ATOM       | 581 | O    | PRO | 44 | 27.532 | 14.209 | 27.409 |  |
| 1.00999.99 |     |      |     | O  |        |        |        |  |
| ATOM       | 582 | CB   | PRO | 44 | 25.304 | 12.025 | 27.422 |  |
| 1.00999.99 |     |      |     | C  |        |        |        |  |
| ATOM       | 583 | CG   | PRO | 44 | 25.499 | 10.776 | 26.629 |  |
| 1.00856.94 |     |      |     | C  |        |        |        |  |
| ATOM       | 584 | CD   | PRO | 44 | 25.036 | 11.107 | 25.207 |  |
| 1.00548.09 |     |      |     | C  |        |        |        |  |
| ATOM       | 585 | HA   | PRO | 44 | 24.987 | 14.010 | 26.663 |  |
| 1.00939.00 |     |      |     | H  |        |        |        |  |
| ATOM       | 586 | HB1  | PRO | 44 | 24.282 | 12.087 | 27.767 |  |
| 1.00999.99 |     |      |     | H  |        |        |        |  |
| ATOM       | 587 | HB2  | PRO | 44 | 25.988 | 12.058 | 28.262 |  |
| 1.00999.99 |     |      |     | H  |        |        |        |  |
| ATOM       | 588 | HG1  | PRO | 44 | 24.900 | 9.973  | 27.033 |  |
| 1.00999.99 |     |      |     | H  |        |        |        |  |
| ATOM       | 589 | HG2  | PRO | 44 | 26.546 | 10.496 | 26.629 |  |
| 1.00853.53 |     |      |     | H  |        |        |        |  |
| ATOM       | 590 | HD1  | PRO | 44 | 23.996 | 10.843 | 25.075 |  |
| 1.00602.45 |     |      |     | H  |        |        |        |  |
| ATOM       | 591 | HD2  | PRO | 44 | 25.655 | 10.599 | 24.481 |  |
| 1.00463.32 |     |      |     | H  |        |        |        |  |
| ATOM       | 592 | N    | ILE | 45 | 27.830 | 13.135 | 25.455 |  |
| 1.00518.33 |     |      |     | N  |        |        |        |  |
| ATOM       | 593 | CA   | ILE | 45 | 29.255 | 13.444 | 25.398 |  |
| 1.00582.79 |     |      |     | C  |        |        |        |  |
| ATOM       | 594 | C    | ILE | 45 | 29.488 | 14.942 | 25.571 |  |
| 1.00795.93 |     |      |     | C  |        |        |        |  |
| ATOM       | 595 | O    | ILE | 45 | 30.514 | 15.363 | 26.107 |  |
| 1.00898.75 |     |      |     | O  |        |        |        |  |
| ATOM       | 596 | CB   | ILE | 45 | 29.838 | 12.978 | 24.059 |  |
| 1.00474.41 |     |      |     | C  |        |        |        |  |
| ATOM       | 597 | CG1  | ILE | 45 | 31.368 | 13.049 | 24.113 |  |
| 1.00516.90 |     |      |     | C  |        |        |        |  |
| ATOM       | 598 | CG2  | ILE | 45 | 29.325 | 13.876 | 22.928 |  |
| 1.00760.75 |     |      |     | C  |        |        |        |  |
| ATOM       | 599 | CD1  | ILE | 45 | 31.954 | 12.360 | 22.880 |  |
| 1.00566.81 |     |      |     | C  |        |        |        |  |
| ATOM       | 600 | HN   | ILE | 45 | 27.423 | 12.606 | 24.740 |  |
| 1.00395.72 |     |      |     | H  |        |        |        |  |
| ATOM       | 601 | HA   | ILE | 45 | 29.754 | 12.917 | 26.197 |  |
| 1.00711.06 |     |      |     | H  |        |        |        |  |
| ATOM       | 602 | HB   | ILE | 45 | 29.533 | 11.958 | 23.872 |  |
| 1.00477.81 |     |      |     | H  |        |        |        |  |
| ATOM       | 603 | HG11 | ILE | 45 | 31.723 | 12.551 | 25.003 |  |
| 1.00624.28 |     |      |     | H  |        |        |        |  |
| ATOM       | 604 | HG12 | ILE | 45 | 31.680 | 14.083 | 24.131 |  |
| 1.00744.84 |     |      |     | H  |        |        |        |  |
| ATOM       | 605 | HG21 | ILE | 45 | 28.274 | 14.077 | 23.074 |  |



|            |     |      |     |   |    |        |        |        |
|------------|-----|------|-----|---|----|--------|--------|--------|
| 1.00920.57 |     |      |     | H |    |        |        |        |
| ATOM       | 606 | HG22 | ILE |   | 45 | 29.466 | 13.376 | 21.980 |
| 1.00999.99 |     |      |     | H |    |        |        |        |
| ATOM       | 607 | HG23 | ILE |   | 45 | 29.871 | 14.808 | 22.928 |
| 1.00865.46 |     |      |     | H |    |        |        |        |
| ATOM       | 608 | HD11 | ILE |   | 45 | 31.706 | 11.309 | 22.902 |
| 1.00658.89 |     |      |     | H |    |        |        |        |
| ATOM       | 609 | HD12 | ILE |   | 45 | 33.028 | 12.476 | 22.879 |
| 1.00734.30 |     |      |     | H |    |        |        |        |
| ATOM       | 610 | HD13 | ILE |   | 45 | 31.544 | 12.808 | 21.987 |
| 1.00675.84 |     |      |     | H |    |        |        |        |
| ATOM       | 611 | N    | ALA |   | 46 | 28.530 | 15.742 | 25.113 |
| 1.00999.99 |     |      |     | N |    |        |        |        |
| ATOM       | 612 | CA   | ALA |   | 46 | 28.642 | 17.192 | 25.224 |
| 1.00999.99 |     |      |     | C |    |        |        |        |
| ATOM       | 613 | C    | ALA |   | 46 | 27.318 | 17.861 | 24.875 |
| 1.00999.99 |     |      |     | C |    |        |        |        |
| ATOM       | 614 | CB   | ALA |   | 46 | 29.737 | 17.704 | 24.286 |
| 1.00999.99 |     |      |     | C |    |        |        |        |
| ATOM       | 615 | OT1  | ALA |   | 46 | 27.215 | 19.063 | 25.062 |
| 1.00999.99 |     |      |     | O |    |        |        |        |
| ATOM       | 616 | OT2  | ALA |   | 46 | 26.423 | 17.163 | 24.427 |
| 1.00999.99 |     |      |     | O |    |        |        |        |
| ATOM       | 617 | HN   | ALA |   | 46 | 27.735 | 15.351 | 24.696 |
| 1.00999.99 |     |      |     | H |    |        |        |        |
| ATOM       | 618 | HA   | ALA |   | 46 | 28.907 | 17.447 | 26.239 |
| 1.00999.99 |     |      |     | H |    |        |        |        |
| ATOM       | 619 | HB1  | ALA |   | 46 | 29.427 | 17.563 | 23.261 |
| 1.00999.99 |     |      |     | H |    |        |        |        |
| ATOM       | 620 | HB2  | ALA |   | 46 | 30.650 | 17.156 | 24.464 |
| 1.00999.99 |     |      |     | H |    |        |        |        |
| ATOM       | 621 | HB3  | ALA |   | 46 | 29.907 | 18.755 | 24.469 |
| 1.00999.99 |     |      |     | H |    |        |        |        |
| ENDMDL     |     |      |     |   |    |        |        |        |
| TER        |     |      |     |   |    |        |        |        |
| MODEL      |     | 7    |     |   |    |        |        |        |
| ATOM       | 1   | N    | GLY |   | 1  | 23.879 | -4.071 | 19.872 |
| 1.00999.99 |     |      |     | N |    |        |        |        |
| ATOM       | 2   | CA   | GLY |   | 1  | 24.684 | -2.819 | 19.959 |
| 1.00999.99 |     |      |     | C |    |        |        |        |
| ATOM       | 3   | C    | GLY |   | 1  | 24.188 | -1.822 | 18.918 |
| 1.00999.99 |     |      |     | C |    |        |        |        |
| ATOM       | 4   | O    | GLY |   | 1  | 23.674 | -0.757 | 19.260 |
| 1.00999.99 |     |      |     | O |    |        |        |        |
| ATOM       | 5   | HA1  | GLY |   | 1  | 25.722 | -3.046 | 19.770 |
| 1.00999.99 |     |      |     | H |    |        |        |        |
| ATOM       | 6   | HA2  | GLY |   | 1  | 24.582 | -2.393 | 20.946 |
| 1.00999.99 |     |      |     | H |    |        |        |        |
| ATOM       | 7   | HT1  | GLY |   | 1  | 24.057 | -4.657 | 20.712 |
| 1.00999.99 |     |      |     | H |    |        |        |        |
| ATOM       | 8   | HT2  | GLY |   | 1  | 24.149 | -4.598 | 19.016 |
| 1.00999.99 |     |      |     | H |    |        |        |        |

|            |    |      |     |   |        |        |        |      |
|------------|----|------|-----|---|--------|--------|--------|------|
| ATOM       | 9  | HT3  | GLY | 1 | 22.869 | -3.832 | 19.828 |      |
| 1.00999.99 |    |      | H   |   |        |        |        |      |
| ATOM       | 10 | N    | LEU | 2 | 24.343 | -2.174 | 17.646 |      |
| 1.00999.99 |    |      | N   |   |        |        |        |      |
| ATOM       | 11 | CA   | LEU | 2 | 23.904 | -1.301 | 16.564 |      |
| 1.00895.59 |    |      | C   |   |        |        |        |      |
| ATOM       | 12 | C    | LEU | 2 | 22.382 | -1.293 | 16.474 |      |
| 1.00532.27 |    |      | C   |   |        |        |        |      |
| ATOM       | 13 | O    | LEU | 2 | 21.727 | -2.284 | 16.794 |      |
| 1.00625.21 |    |      | O   |   |        |        |        |      |
| ATOM       | 14 | CB   | LEU | 2 | 24.492 | -1.784 | 15.234 |      |
| 1.00999.99 |    |      | C   |   |        |        |        |      |
| ATOM       | 15 | CG   | LEU | 2 | 26.023 | -1.817 | 15.319 |      |
| 1.00999.99 |    |      | C   |   |        |        |        |      |
| ATOM       | 16 | CD1  | LEU | 2 | 26.584 | -2.388 | 14.014 |      |
| 1.00999.99 |    |      | C   |   |        |        |        |      |
| ATOM       | 17 | CD2  | LEU | 2 | 26.573 | -0.396 | 15.542 |      |
| 1.00999.99 |    |      | C   |   |        |        |        |      |
| ATOM       | 18 | HN   | LEU | 2 | 24.758 | -3.037 | 17.432 |      |
| 1.00999.99 |    |      | H   |   |        |        |        |      |
| ATOM       | 19 | HA   | LEU | 2 | 24.249 | -0.298 | 16.756 |      |
| 1.00890.87 |    |      | H   |   |        |        |        |      |
| ATOM       | 20 | HB1  | LEU | 2 | 24.192 | -1.109 | 14.445 |      |
| 1.00924.07 |    |      | H   |   |        |        |        |      |
| ATOM       | 21 | HB2  | LEU | 2 | 24.121 | -2.775 | 15.018 |      |
| 1.00999.99 |    |      | H   |   |        |        |        |      |
| ATOM       | 22 | HG   | LEU | 2 | 26.320 | -2.453 | 16.142 |      |
| 1.00999.99 |    |      | H   |   |        |        |        |      |
| ATOM       | 23 | HD11 | LEU | 2 | 26.049 | -3.290 | 13.754 |      |
| 1.00999.99 |    |      | H   |   |        |        |        |      |
| ATOM       | 24 | HD12 | LEU | 2 | 27.632 | -2.616 | 14.140 |      |
| 1.00999.99 |    |      | H   |   |        |        |        |      |
| ATOM       | 25 | HD13 | LEU | 2 | 26.467 | -1.662 | 13.222 |      |
| 1.00999.99 |    |      | H   |   |        |        |        |      |
| ATOM       | 26 | HD21 | LEU | 2 | 25.972 | 0.319  | 15.000 |      |
| 1.00999.99 |    |      | H   |   |        |        |        |      |
| ATOM       | 27 | HD22 | LEU | 2 | 27.596 | -0.342 | 15.190 |      |
| 1.00999.99 |    |      | H   |   |        |        |        |      |
| ATOM       | 28 | HD23 | LEU | 2 | 26.550 | -0.162 | 16.595 |      |
| 1.00999.99 |    |      | H   |   |        |        |        |      |
| ATOM       | 29 | N    | CYS | 3 | 21.824 | -0.164 | 16.042 |      |
| 1.00271.28 |    |      | N   |   |        |        |        |      |
| ATOM       | 30 | CA   | CYS | 3 | 20.373 | -0.036 | 15.921 |      |
| 1.00104.50 |    |      | C   |   |        |        |        |      |
| ATOM       | 31 | C    | CYS | 3 | 19.896 | -0.562 | 14.572 | 1.00 |
| 90.98      |    |      | C   |   |        |        |        |      |
| ATOM       | 32 | O    | CYS | 3 | 20.106 | 0.071  | 13.537 |      |
| 1.00207.28 |    |      | O   |   |        |        |        |      |
| ATOM       | 33 | CB   | CYS | 3 | 19.966 | 1.432  | 16.060 | 1.00 |
| 37.83      |    |      | C   |   |        |        |        |      |
| ATOM       | 34 | SG   | CYS | 3 | 20.465 | 2.048  | 17.687 | 1.00 |
| 81.56      |    |      | S   |   |        |        |        |      |

|            |    |     |     |   |        |        |        |      |
|------------|----|-----|-----|---|--------|--------|--------|------|
| ATOM       | 35 | HN  | CYS | 3 | 22.396 | 0.596  | 15.803 |      |
| 1.00296.55 |    |     |     |   |        |        |        | H    |
| ATOM       | 36 | HA  | CYS | 3 | 19.899 | -0.604 | 16.707 |      |
| 1.00166.45 |    |     |     |   |        |        |        | H    |
| ATOM       | 37 | HB1 | CYS | 3 | 18.895 | 1.519  | 15.956 | 1.00 |
| 40.38      |    |     | H   |   |        |        |        |      |
| ATOM       | 38 | HB2 | CYS | 3 | 20.450 | 2.015  | 15.291 | 1.00 |
| 98.45      |    |     | H   |   |        |        |        |      |
| ATOM       | 39 | N   | SER | 4 | 19.242 | -1.719 | 14.593 | 1.00 |
| 85.31      |    |     | N   |   |        |        |        |      |
| ATOM       | 40 | CA  | SER | 4 | 18.726 | -2.316 | 13.365 | 1.00 |
| 92.94      |    |     | C   |   |        |        |        |      |
| ATOM       | 41 | C   | SER | 4 | 17.696 | -1.392 | 12.742 | 1.00 |
| 67.37      |    |     | C   |   |        |        |        |      |
| ATOM       | 42 | O   | SER | 4 | 17.659 | -1.200 | 11.527 |      |
| 1.00102.28 |    |     | O   |   |        |        |        |      |
| ATOM       | 43 | CB  | SER | 4 | 18.046 | -3.646 | 13.675 |      |
| 1.00123.83 |    |     | C   |   |        |        |        |      |
| ATOM       | 44 | OG  | SER | 4 | 17.672 | -4.277 | 12.458 |      |
| 1.00178.89 |    |     | O   |   |        |        |        |      |
| ATOM       | 45 | HN  | SER | 4 | 19.097 | -2.175 | 15.447 |      |
| 1.00163.03 |    |     | H   |   |        |        |        |      |
| ATOM       | 46 | HA  | SER | 4 | 19.536 | -2.479 | 12.672 |      |
| 1.00129.78 |    |     | H   |   |        |        |        |      |
| ATOM       | 47 | HB1 | SER | 4 | 17.161 | -3.457 | 14.276 |      |
| 1.00105.26 |    |     | H   |   |        |        |        |      |
| ATOM       | 48 | HB2 | SER | 4 | 18.722 | -4.286 | 14.219 |      |
| 1.00156.87 |    |     | H   |   |        |        |        |      |
| ATOM       | 49 | HG  | SER | 4 | 17.603 | -3.598 | 11.781 |      |
| 1.00218.16 |    |     | H   |   |        |        |        |      |
| ATOM       | 50 | N   | GLU | 5 | 16.843 | -0.844 | 13.599 | 1.00 |
| 41.67      |    |     | N   |   |        |        |        |      |
| ATOM       | 51 | CA  | GLU | 5 | 15.776 | 0.047  | 13.168 | 1.00 |
| 41.21      |    |     | C   |   |        |        |        |      |
| ATOM       | 52 | C   | GLU | 5 | 15.546 | 1.138  | 14.210 | 1.00 |
| 41.92      |    |     | C   |   |        |        |        |      |
| ATOM       | 53 | O   | GLU | 5 | 16.356 | 1.318  | 15.118 | 1.00 |
| 74.72      |    |     | O   |   |        |        |        |      |
| ATOM       | 54 | CB  | GLU | 5 | 14.497 | -0.761 | 12.972 | 1.00 |
| 49.24      |    |     | C   |   |        |        |        |      |
| ATOM       | 55 | CG  | GLU | 5 | 14.144 | -1.458 | 14.278 | 1.00 |
| 55.48      |    |     | C   |   |        |        |        |      |
| ATOM       | 56 | CD  | GLU | 5 | 13.025 | -2.467 | 14.050 | 1.00 |
| 92.06      |    |     | C   |   |        |        |        |      |
| ATOM       | 57 | OE1 | GLU | 5 | 12.576 | -2.578 | 12.921 |      |
| 1.00206.49 |    |     | O   |   |        |        |        |      |
| ATOM       | 58 | OE2 | GLU | 5 | 12.631 | -3.114 | 15.008 |      |
| 1.00197.24 |    |     | O1- |   |        |        |        |      |
| ATOM       | 59 | HN  | GLU | 5 | 16.926 | -1.058 | 14.552 | 1.00 |
| 45.52      |    |     | H   |   |        |        |        |      |
| ATOM       | 60 | HA  | GLU | 5 | 16.044 | 0.502  | 12.235 | 1.00 |
| 60.63      |    |     | H   |   |        |        |        |      |

|            |    |      |     |   |        |        |        |      |
|------------|----|------|-----|---|--------|--------|--------|------|
| ATOM       | 61 | HB1  | GLU | 5 | 14.653 | -1.503 | 12.202 | 1.00 |
| 61.59      |    | H    |     |   |        |        |        |      |
| ATOM       | 62 | HB2  | GLU | 5 | 13.697 | -0.106 | 12.685 | 1.00 |
| 63.66      |    | H    |     |   |        |        |        |      |
| ATOM       | 63 | HG1  | GLU | 5 | 13.823 | -0.723 | 15.001 | 1.00 |
| 58.03      |    | H    |     |   |        |        |        |      |
| ATOM       | 64 | HG2  | GLU | 5 | 15.018 | -1.965 | 14.649 | 1.00 |
| 57.77      |    | H    |     |   |        |        |        |      |
| ATOM       | 65 | N    | ASN | 6 | 14.440 | 1.861  | 14.076 | 1.00 |
| 50.73      |    | N    |     |   |        |        |        |      |
| ATOM       | 66 | CA   | ASN | 6 | 14.128 | 2.929  | 15.020 | 1.00 |
| 71.04      |    | C    |     |   |        |        |        |      |
| ATOM       | 67 | C    | ASN | 6 | 14.001 | 2.362  | 16.431 | 1.00 |
| 65.17      |    | C    |     |   |        |        |        |      |
| ATOM       | 68 | O    | ASN | 6 | 14.454 | 2.972  | 17.400 | 1.00 |
| 94.86      |    | O    |     |   |        |        |        |      |
| ATOM       | 69 | CB   | ASN | 6 | 12.820 | 3.616  | 14.623 | 1.00 |
| 94.83      |    | C    |     |   |        |        |        |      |
| ATOM       | 70 | CG   | ASN | 6 | 13.030 | 4.448  | 13.362 |      |
| 1.00160.94 |    |      | C   |   |        |        |        |      |
| ATOM       | 71 | ND2  | ASN | 6 | 12.001 | 4.785  | 12.634 |      |
| 1.00244.88 |    |      | N   |   |        |        |        |      |
| ATOM       | 72 | OD1  | ASN | 6 | 14.163 | 4.798  | 13.030 |      |
| 1.00219.73 |    |      | O   |   |        |        |        |      |
| ATOM       | 73 | HN   | ASN | 6 | 13.827 | 1.677  | 13.335 | 1.00 |
| 72.81      |    | H    |     |   |        |        |        |      |
| ATOM       | 74 | HA   | ASN | 6 | 14.925 | 3.657  | 15.005 | 1.00 |
| 96.02      |    | H    |     |   |        |        |        |      |
| ATOM       | 75 | HB1  | ASN | 6 | 12.495 | 4.261  | 15.424 |      |
| 1.00111.09 |    |      | H   |   |        |        |        |      |
| ATOM       | 76 | HB2  | ASN | 6 | 12.064 | 2.866  | 14.436 | 1.00 |
| 98.13      |    | H    |     |   |        |        |        |      |
| ATOM       | 77 | HD21 | ASN | 6 | 11.101 | 4.505  | 12.900 |      |
| 1.00272.43 |    |      | H   |   |        |        |        |      |
| ATOM       | 78 | HD22 | ASN | 6 | 12.128 | 5.320  | 11.822 |      |
| 1.00336.78 |    |      | H   |   |        |        |        |      |
| ATOM       | 79 | N    | GLY | 7 | 13.386 | 1.184  | 16.535 | 1.00 |
| 51.80      |    | N    |     |   |        |        |        |      |
| ATOM       | 80 | CA   | GLY | 7 | 13.204 | 0.518  | 17.828 | 1.00 |
| 71.47      |    | C    |     |   |        |        |        |      |
| ATOM       | 81 | C    | GLY | 7 | 13.900 | -0.836 | 17.830 | 1.00 |
| 41.04      |    | C    |     |   |        |        |        |      |
| ATOM       | 82 | O    | GLY | 7 | 13.260 | -1.877 | 17.974 | 1.00 |
| 44.54      |    | O    |     |   |        |        |        |      |
| ATOM       | 83 | HN   | GLY | 7 | 13.054 | 0.747  | 15.724 | 1.00 |
| 45.49      |    | H    |     |   |        |        |        |      |
| ATOM       | 84 | HA1  | GLY | 7 | 12.155 | 0.368  | 18.002 |      |
| 1.00103.52 |    |      | H   |   |        |        |        |      |
| ATOM       | 85 | HA2  | GLY | 7 | 13.613 | 1.130  | 18.621 |      |
| 1.00108.67 |    |      | H   |   |        |        |        |      |
| ATOM       | 86 | N    | ASP | 8 | 15.214 | -0.810 | 17.662 | 1.00 |
| 27.00      |    | N    |     |   |        |        |        |      |

|            |     |     |     |    |        |        |        |      |
|------------|-----|-----|-----|----|--------|--------|--------|------|
| ATOM       | 87  | CA  | ASP | 8  | 16.001 | -2.039 | 17.635 | 1.00 |
| 14.15      |     |     | C   |    |        |        |        |      |
| ATOM       | 88  | C   | ASP | 8  | 15.864 | -2.798 | 18.947 | 1.00 |
| 9.37       |     |     | C   |    |        |        |        |      |
| ATOM       | 89  | O   | ASP | 8  | 15.663 | -4.013 | 18.954 | 1.00 |
| 14.61      |     |     | O   |    |        |        |        |      |
| ATOM       | 90  | CB  | ASP | 8  | 17.473 | -1.713 | 17.382 | 1.00 |
| 15.06      |     |     | C   |    |        |        |        |      |
| ATOM       | 91  | CG  | ASP | 8  | 18.281 | -3.001 | 17.277 | 1.00 |
| 21.22      |     |     | C   |    |        |        |        |      |
| ATOM       | 92  | OD1 | ASP | 8  | 19.446 | -2.919 | 16.927 |      |
| 1.00119.56 |     |     | O   |    |        |        |        |      |
| ATOM       | 93  | OD2 | ASP | 8  | 17.722 | -4.051 | 17.549 |      |
| 1.00133.27 |     |     | O1- |    |        |        |        |      |
| ATOM       | 94  | HN  | ASP | 8  | 15.662 | 0.053  | 17.547 | 1.00 |
| 35.63      |     |     | H   |    |        |        |        |      |
| ATOM       | 95  | HA  | ASP | 8  | 15.642 | -2.662 | 16.836 | 1.00 |
| 20.92      |     |     | H   |    |        |        |        |      |
| ATOM       | 96  | HB1 | ASP | 8  | 17.854 | -1.118 | 18.200 | 1.00 |
| 29.39      |     |     | H   |    |        |        |        |      |
| ATOM       | 97  | HB2 | ASP | 8  | 17.564 | -1.155 | 16.461 | 1.00 |
| 44.14      |     |     | H   |    |        |        |        |      |
| ATOM       | 98  | N   | CYS | 9  | 15.974 | -2.078 | 20.054 | 1.00 |
| 5.93       |     |     | N   |    |        |        |        |      |
| ATOM       | 99  | CA  | CYS | 9  | 15.858 | -2.700 | 21.367 | 1.00 |
| 7.54       |     |     | C   |    |        |        |        |      |
| ATOM       | 100 | C   | CYS | 9  | 14.471 | -3.304 | 21.543 | 1.00 |
| 14.60      |     |     | C   |    |        |        |        |      |
| ATOM       | 101 | O   | CYS | 9  | 14.316 | -4.410 | 22.059 | 1.00 |
| 25.78      |     |     | O   |    |        |        |        |      |
| ATOM       | 102 | CB  | CYS | 9  | 16.105 | -1.670 | 22.457 | 1.00 |
| 6.63       |     |     | C   |    |        |        |        |      |
| ATOM       | 103 | SG  | CYS | 9  | 17.849 | -1.223 | 22.436 | 1.00 |
| 10.91      |     |     | S   |    |        |        |        |      |
| ATOM       | 104 | HN  | CYS | 9  | 16.131 | -1.114 | 19.985 | 1.00 |
| 6.51       |     |     | H   |    |        |        |        |      |
| ATOM       | 105 | HA  | CYS | 9  | 16.603 | -3.471 | 21.455 | 1.00 |
| 11.12      |     |     | H   |    |        |        |        |      |
| ATOM       | 106 | HB1 | CYS | 9  | 15.855 | -2.089 | 23.417 | 1.00 |
| 11.28      |     |     | H   |    |        |        |        |      |
| ATOM       | 107 | HB2 | CYS | 9  | 15.502 | -0.792 | 22.273 | 1.00 |
| 5.04       |     |     | H   |    |        |        |        |      |
| ATOM       | 108 | N   | ALA | 10 | 13.467 | -2.558 | 21.098 | 1.00 |
| 16.26      |     |     | N   |    |        |        |        |      |
| ATOM       | 109 | CA  | ALA | 10 | 12.082 | -3.001 | 21.189 | 1.00 |
| 32.04      |     |     | C   |    |        |        |        |      |
| ATOM       | 110 | C   | ALA | 10 | 11.181 | -2.054 | 20.399 | 1.00 |
| 45.47      |     |     | C   |    |        |        |        |      |
| ATOM       | 111 | O   | ALA | 10 | 11.611 | -0.976 | 19.990 |      |
| 1.00119.04 |     |     | O   |    |        |        |        |      |
| ATOM       | 112 | CB  | ALA | 10 | 11.636 | -3.048 | 22.654 | 1.00 |
| 30.10      |     |     | C   |    |        |        |        |      |

|            |     |     |     |    |        |        |        |      |
|------------|-----|-----|-----|----|--------|--------|--------|------|
| ATOM       | 113 | HN  | ALA | 10 | 13.666 | -1.688 | 20.694 | 1.00 |
| 12.81      |     |     | H   |    |        |        |        |      |
| ATOM       | 114 | HA  | ALA | 10 | 12.002 | -3.991 | 20.767 | 1.00 |
| 47.14      |     |     | H   |    |        |        |        |      |
| ATOM       | 115 | HB1 | ALA | 10 | 12.445 | -3.420 | 23.263 | 1.00 |
| 84.37      |     |     | H   |    |        |        |        |      |
| ATOM       | 116 | HB2 | ALA | 10 | 10.782 | -3.704 | 22.749 |      |
| 1.00118.20 |     |     |     |    |        |        |        | H    |
| ATOM       | 117 | HB3 | ALA | 10 | 11.364 | -2.056 | 22.983 |      |
| 1.00117.32 |     |     |     |    |        |        |        | H    |
| ATOM       | 118 | N   | ALA | 11 | 9.936  | -2.461 | 20.182 | 1.00 |
| 30.62      |     |     | N   |    |        |        |        |      |
| ATOM       | 119 | CA  | ALA | 11 | 8.997  | -1.632 | 19.434 | 1.00 |
| 35.24      |     |     | C   |    |        |        |        |      |
| ATOM       | 120 | C   | ALA | 11 | 8.778  | -0.293 | 20.136 | 1.00 |
| 22.78      |     |     | C   |    |        |        |        |      |
| ATOM       | 121 | O   | ALA | 11 | 8.727  | 0.753  | 19.491 | 1.00 |
| 53.33      |     |     | O   |    |        |        |        |      |
| ATOM       | 122 | CB  | ALA | 11 | 7.660  | -2.359 | 19.291 | 1.00 |
| 60.49      |     |     | C   |    |        |        |        |      |
| ATOM       | 123 | HN  | ALA | 11 | 9.644  | -3.330 | 20.527 | 1.00 |
| 50.37      |     |     | H   |    |        |        |        |      |
| ATOM       | 124 | HA  | ALA | 11 | 9.400  | -1.449 | 18.450 | 1.00 |
| 41.70      |     |     | H   |    |        |        |        |      |
| ATOM       | 125 | HB1 | ALA | 11 | 6.952  | -1.717 | 18.787 |      |
| 1.00157.06 |     |     |     |    |        |        |        | H    |
| ATOM       | 126 | HB2 | ALA | 11 | 7.281  | -2.614 | 20.269 |      |
| 1.00148.83 |     |     |     |    |        |        |        | H    |
| ATOM       | 127 | HB3 | ALA | 11 | 7.800  | -3.262 | 18.715 |      |
| 1.00137.06 |     |     |     |    |        |        |        | H    |
| ATOM       | 128 | N   | ASP | 12 | 8.648  | -0.334 | 21.460 | 1.00 |
| 18.98      |     |     | N   |    |        |        |        |      |
| ATOM       | 129 | CA  | ASP | 12 | 8.431  | 0.883  | 22.238 | 1.00 |
| 31.05      |     |     | C   |    |        |        |        |      |
| ATOM       | 130 | C   | ASP | 12 | 9.749  | 1.604  | 22.509 | 1.00 |
| 22.98      |     |     | C   |    |        |        |        |      |
| ATOM       | 131 | O   | ASP | 12 | 9.799  | 2.833  | 22.550 | 1.00 |
| 37.14      |     |     | O   |    |        |        |        |      |
| ATOM       | 132 | CB  | ASP | 12 | 7.757  | 0.537  | 23.568 | 1.00 |
| 48.35      |     |     | C   |    |        |        |        |      |
| ATOM       | 133 | CG  | ASP | 12 | 6.325  | 0.073  | 23.322 |      |
| 1.00104.83 |     |     |     |    |        |        |        | C    |
| ATOM       | 134 | OD1 | ASP | 12 | 5.743  | -0.496 | 24.230 |      |
| 1.00258.73 |     |     |     |    |        |        |        | O    |
| ATOM       | 135 | OD2 | ASP | 12 | 5.833  | 0.292  | 22.227 |      |
| 1.00213.46 |     |     |     |    |        |        |        | O1-  |
| ATOM       | 136 | HN  | ASP | 12 | 8.696  | -1.198 | 21.921 | 1.00 |
| 36.19      |     |     | H   |    |        |        |        |      |
| ATOM       | 137 | HA  | ASP | 12 | 7.780  | 1.544  | 21.683 | 1.00 |
| 49.76      |     |     | H   |    |        |        |        |      |
| ATOM       | 138 | HB1 | ASP | 12 | 7.745  | 1.410  | 24.202 | 1.00 |
| 95.71      |     |     | H   |    |        |        |        |      |

|            |     |     |     |     |        |        |        |      |
|------------|-----|-----|-----|-----|--------|--------|--------|------|
| ATOM       | 139 | HB2 | ASP | 12  | 8.311  | -0.253 | 24.054 | 1.00 |
| 54.37      |     | H   |     |     |        |        |        |      |
| ATOM       | 140 | N   | GLU | 13  | 10.813 | 0.830  | 22.701 | 1.00 |
| 17.60      |     | N   |     |     |        |        |        |      |
| ATOM       | 141 | CA  | GLU | 13  | 12.128 | 1.403  | 22.976 | 1.00 |
| 12.01      |     | C   |     |     |        |        |        |      |
| ATOM       | 142 | C   | GLU | 13  | 12.715 | 2.046  | 21.721 | 1.00 |
| 10.07      |     | C   |     |     |        |        |        |      |
| ATOM       | 143 | O   | GLU | 13  | 12.411 | 1.637  | 20.601 | 1.00 |
| 12.81      |     | O   |     |     |        |        |        |      |
| ATOM       | 144 | CB  | GLU | 13  | 13.071 | 0.311  | 23.484 | 1.00 |
| 11.74      |     | C   |     |     |        |        |        |      |
| ATOM       | 145 | CG  | GLU | 13  | 12.566 | -0.206 | 24.833 | 1.00 |
| 13.49      |     | C   |     |     |        |        |        |      |
| ATOM       | 146 | CD  | GLU | 13  | 13.416 | -1.384 | 25.294 |      |
| 1.00142.36 |     |     |     | C   |        |        |        |      |
| ATOM       | 147 | OE1 | GLU | 13  | 12.842 | -2.378 | 25.706 |      |
| 1.00339.06 |     |     |     | O   |        |        |        |      |
| ATOM       | 148 | OE2 | GLU | 13  | 14.628 | -1.276 | 25.226 |      |
| 1.00335.28 |     |     |     | O1- |        |        |        |      |
| ATOM       | 149 | HN  | GLU | 13  | 10.712 | -0.144 | 22.662 | 1.00 |
| 28.36      |     | H   |     |     |        |        |        |      |
| ATOM       | 150 | HA  | GLU | 13  | 12.026 | 2.154  | 23.744 | 1.00 |
| 13.06      |     | H   |     |     |        |        |        |      |
| ATOM       | 151 | HB1 | GLU | 13  | 14.063 | 0.719  | 23.604 | 1.00 |
| 13.76      |     | H   |     |     |        |        |        |      |
| ATOM       | 152 | HB2 | GLU | 13  | 13.098 | -0.502 | 22.771 | 1.00 |
| 9.94       |     | H   |     |     |        |        |        |      |
| ATOM       | 153 | HG1 | GLU | 13  | 11.539 | -0.522 | 24.736 | 1.00 |
| 66.02      |     | H   |     |     |        |        |        |      |
| ATOM       | 154 | HG2 | GLU | 13  | 12.628 | 0.586  | 25.565 | 1.00 |
| 56.23      |     | H   |     |     |        |        |        |      |
| ATOM       | 155 | N   | CYS | 14  | 13.569 | 3.054  | 21.919 | 1.00 |
| 9.12       |     | N   |     |     |        |        |        |      |
| ATOM       | 156 | CA  | CYS | 14  | 14.212 | 3.753  | 20.805 | 1.00 |
| 10.69      |     | C   |     |     |        |        |        |      |
| ATOM       | 157 | C   | CYS | 14  | 15.666 | 3.318  | 20.692 | 1.00 |
| 9.56       |     | C   |     |     |        |        |        |      |
| ATOM       | 158 | O   | CYS | 14  | 16.262 | 2.897  | 21.677 | 1.00 |
| 13.62      |     | O   |     |     |        |        |        |      |
| ATOM       | 159 | CB  | CYS | 14  | 14.154 | 5.267  | 21.026 | 1.00 |
| 13.96      |     | C   |     |     |        |        |        |      |
| ATOM       | 160 | SG  | CYS | 14  | 15.151 | 6.096  | 19.761 | 1.00 |
| 42.96      |     | S   |     |     |        |        |        |      |
| ATOM       | 161 | HN  | CYS | 14  | 13.779 | 3.328  | 22.836 | 1.00 |
| 9.76       |     | H   |     |     |        |        |        |      |
| ATOM       | 162 | HA  | CYS | 14  | 13.702 | 3.516  | 19.881 | 1.00 |
| 15.54      |     | H   |     |     |        |        |        |      |
| ATOM       | 163 | HB1 | CYS | 14  | 14.544 | 5.504  | 22.004 | 1.00 |
| 50.72      |     | H   |     |     |        |        |        |      |
| ATOM       | 164 | HB2 | CYS | 14  | 13.130 | 5.602  | 20.955 | 1.00 |
| 46.13      |     | H   |     |     |        |        |        |      |

|            |     |      |     |    |        |       |        |      |
|------------|-----|------|-----|----|--------|-------|--------|------|
| ATOM       | 165 | N    | CYS | 15 | 16.229 | 3.418 | 19.491 | 1.00 |
| 9.60       |     | N    |     |    |        |       |        |      |
| ATOM       | 166 | CA   | CYS | 15 | 17.622 | 3.027 | 19.270 | 1.00 |
| 9.28       |     | C    |     |    |        |       |        |      |
| ATOM       | 167 | C    | CYS | 15 | 18.239 | 3.913 | 18.195 | 1.00 |
| 9.92       |     | C    |     |    |        |       |        |      |
| ATOM       | 168 | O    | CYS | 15 | 17.660 | 4.093 | 17.124 | 1.00 |
| 13.31      |     | O    |     |    |        |       |        |      |
| ATOM       | 169 | CB   | CYS | 15 | 17.688 | 1.562 | 18.827 | 1.00 |
| 12.90      |     | C    |     |    |        |       |        |      |
| ATOM       | 170 | SG   | CYS | 15 | 19.386 | 0.948 | 18.993 | 1.00 |
| 39.11      |     | S    |     |    |        |       |        |      |
| ATOM       | 171 | HN   | CYS | 15 | 15.704 | 3.762 | 18.740 | 1.00 |
| 13.12      |     | H    |     |    |        |       |        |      |
| ATOM       | 172 | HA   | CYS | 15 | 18.182 | 3.144 | 20.189 | 1.00 |
| 8.26       |     | H    |     |    |        |       |        |      |
| ATOM       | 173 | HB1  | CYS | 15 | 17.379 | 1.485 | 17.795 | 1.00 |
| 24.82      |     | H    |     |    |        |       |        |      |
| ATOM       | 174 | HB2  | CYS | 15 | 17.031 | 0.969 | 19.444 | 1.00 |
| 27.31      |     | H    |     |    |        |       |        |      |
| ATOM       | 175 | N    | VAL | 16 | 19.414 | 4.470 | 18.482 | 1.00 |
| 9.56       |     | N    |     |    |        |       |        |      |
| ATOM       | 176 | CA   | VAL | 16 | 20.088 | 5.340 | 17.520 | 1.00 |
| 11.99      |     | C    |     |    |        |       |        |      |
| ATOM       | 177 | C    | VAL | 16 | 21.601 | 5.221 | 17.662 | 1.00 |
| 7.73       |     | C    |     |    |        |       |        |      |
| ATOM       | 178 | O    | VAL | 16 | 22.138 | 5.288 | 18.767 | 1.00 |
| 8.83       |     | O    |     |    |        |       |        |      |
| ATOM       | 179 | CB   | VAL | 16 | 19.658 | 6.790 | 17.747 | 1.00 |
| 18.37      |     | C    |     |    |        |       |        |      |
| ATOM       | 180 | CG1  | VAL | 16 | 20.206 | 7.287 | 19.086 | 1.00 |
| 39.61      |     | C    |     |    |        |       |        |      |
| ATOM       | 181 | CG2  | VAL | 16 | 20.201 | 7.663 | 16.615 |      |
| 1.00115.21 |     |      | C   |    |        |       |        |      |
| ATOM       | 182 | HN   | VAL | 16 | 19.836 | 4.295 | 19.352 | 1.00 |
| 9.76       |     | H    |     |    |        |       |        |      |
| ATOM       | 183 | HA   | VAL | 16 | 19.811 | 5.047 | 16.517 | 1.00 |
| 17.27      |     | H    |     |    |        |       |        |      |
| ATOM       | 184 | HB   | VAL | 16 | 18.580 | 6.845 | 17.759 | 1.00 |
| 52.63      |     | H    |     |    |        |       |        |      |
| ATOM       | 185 | HG11 | VAL | 16 | 19.706 | 8.203 | 19.361 |      |
| 1.00128.07 |     |      | H   |    |        |       |        |      |
| ATOM       | 186 | HG12 | VAL | 16 | 21.268 | 7.470 | 18.995 |      |
| 1.00154.13 |     |      | H   |    |        |       |        |      |
| ATOM       | 187 | HG13 | VAL | 16 | 20.034 | 6.539 | 19.845 |      |
| 1.00135.74 |     |      | H   |    |        |       |        |      |
| ATOM       | 188 | HG21 | VAL | 16 | 19.848 | 8.675 | 16.742 |      |
| 1.00229.05 |     |      | H   |    |        |       |        |      |
| ATOM       | 189 | HG22 | VAL | 16 | 19.855 | 7.277 | 15.667 |      |
| 1.00261.82 |     |      | H   |    |        |       |        |      |
| ATOM       | 190 | HG23 | VAL | 16 | 21.280 | 7.651 | 16.637 |      |
| 1.00210.07 |     |      | H   |    |        |       |        |      |



|            |     |      |     |    |        |        |        |      |
|------------|-----|------|-----|----|--------|--------|--------|------|
| ATOM       | 191 | N    | ASP | 17 | 22.284 | 5.044  | 16.532 | 1.00 |
| 14.34      |     |      | N   |    |        |        |        |      |
| ATOM       | 192 | CA   | ASP | 17 | 23.741 | 4.915  | 16.532 | 1.00 |
| 11.90      |     |      | C   |    |        |        |        |      |
| ATOM       | 193 | C    | ASP | 17 | 24.394 | 6.231  | 16.127 | 1.00 |
| 13.15      |     |      | C   |    |        |        |        |      |
| ATOM       | 194 | O    | ASP | 17 | 24.163 | 6.739  | 15.029 | 1.00 |
| 25.96      |     |      | O   |    |        |        |        |      |
| ATOM       | 195 | CB   | ASP | 17 | 24.166 | 3.822  | 15.551 | 1.00 |
| 20.80      |     |      | C   |    |        |        |        |      |
| ATOM       | 196 | CG   | ASP | 17 | 23.754 | 2.453  | 16.083 | 1.00 |
| 28.72      |     |      | C   |    |        |        |        |      |
| ATOM       | 197 | OD1  | ASP | 17 | 23.420 | 2.372  | 17.254 |      |
| 1.00135.42 |     |      | O   |    |        |        |        |      |
| ATOM       | 198 | OD2  | ASP | 17 | 23.779 | 1.508  | 15.312 |      |
| 1.00114.17 |     |      | O1- |    |        |        |        |      |
| ATOM       | 199 | HN   | ASP | 17 | 21.799 | 4.998  | 15.682 | 1.00 |
| 28.29      |     |      | H   |    |        |        |        |      |
| ATOM       | 200 | HA   | ASP | 17 | 24.082 | 4.645  | 17.522 | 1.00 |
| 10.49      |     |      | H   |    |        |        |        |      |
| ATOM       | 201 | HB1  | ASP | 17 | 25.238 | 3.849  | 15.427 | 1.00 |
| 22.42      |     |      | H   |    |        |        |        |      |
| ATOM       | 202 | HB2  | ASP | 17 | 23.692 | 3.994  | 14.595 | 1.00 |
| 29.52      |     |      | H   |    |        |        |        |      |
| ATOM       | 203 | N    | THR | 18 | 25.225 | 6.773  | 17.016 | 1.00 |
| 11.55      |     |      | N   |    |        |        |        |      |
| ATOM       | 204 | CA   | THR | 18 | 25.930 | 8.027  | 16.746 | 1.00 |
| 17.10      |     |      | C   |    |        |        |        |      |
| ATOM       | 205 | C    | THR | 18 | 27.403 | 7.749  | 16.491 | 1.00 |
| 10.63      |     |      | C   |    |        |        |        |      |
| ATOM       | 206 | O    | THR | 18 | 27.901 | 6.671  | 16.808 | 1.00 |
| 6.49       |     |      | O   |    |        |        |        |      |
| ATOM       | 207 | CB   | THR | 18 | 25.800 | 8.978  | 17.936 | 1.00 |
| 28.52      |     |      | C   |    |        |        |        |      |
| ATOM       | 208 | CG2  | THR | 18 | 24.361 | 9.480  | 18.046 | 1.00 |
| 45.38      |     |      | C   |    |        |        |        |      |
| ATOM       | 209 | OG1  | THR | 18 | 26.163 | 8.297  | 19.126 | 1.00 |
| 26.49      |     |      | O   |    |        |        |        |      |
| ATOM       | 210 | HN   | THR | 18 | 25.376 | 6.314  | 17.868 | 1.00 |
| 13.96      |     |      | H   |    |        |        |        |      |
| ATOM       | 211 | HA   | THR | 18 | 25.508 | 8.502  | 15.871 | 1.00 |
| 26.43      |     |      | H   |    |        |        |        |      |
| ATOM       | 212 | HB   | THR | 18 | 26.458 | 9.822  | 17.793 | 1.00 |
| 37.43      |     |      | H   |    |        |        |        |      |
| ATOM       | 213 | HG1  | THR | 18 | 25.607 | 8.622  | 19.837 | 1.00 |
| 71.62      |     |      | H   |    |        |        |        |      |
| ATOM       | 214 | HG21 | THR | 18 | 24.315 | 10.275 | 18.774 |      |
| 1.00100.44 |     |      | H   |    |        |        |        |      |
| ATOM       | 215 | HG22 | THR | 18 | 23.720 | 8.669  | 18.355 |      |
| 1.00129.42 |     |      | H   |    |        |        |        |      |
| ATOM       | 216 | HG23 | THR | 18 | 24.036 | 9.852  | 17.086 |      |
| 1.00156.21 |     |      | H   |    |        |        |        |      |

|            |     |      |     |    |        |        |        |      |
|------------|-----|------|-----|----|--------|--------|--------|------|
| ATOM       | 217 | N    | VAL | 19 | 28.091 | 8.736  | 15.935 | 1.00 |
| 16.32      |     |      | N   |    |        |        |        |      |
| ATOM       | 218 | CA   | VAL | 19 | 29.500 | 8.618  | 15.649 | 1.00 |
| 13.34      |     |      | C   |    |        |        |        |      |
| ATOM       | 219 | C    | VAL | 19 | 29.984 | 9.884  | 14.977 | 1.00 |
| 25.88      |     |      | C   |    |        |        |        |      |
| ATOM       | 220 | O    | VAL | 19 | 29.548 | 10.249 | 13.885 | 1.00 |
| 42.11      |     |      | O   |    |        |        |        |      |
| ATOM       | 221 | CB   | VAL | 19 | 29.806 | 7.409  | 14.763 | 1.00 |
| 15.48      |     |      | C   |    |        |        |        |      |
| ATOM       | 222 | CG1  | VAL | 19 | 28.884 | 7.402  | 13.539 | 1.00 |
| 29.06      |     |      | C   |    |        |        |        |      |
| ATOM       | 223 | CG2  | VAL | 19 | 31.270 | 7.484  | 14.308 | 1.00 |
| 20.67      |     |      | C   |    |        |        |        |      |
| ATOM       | 224 | HN   | VAL | 19 | 27.646 | 9.578  | 15.726 | 1.00 |
| 26.89      |     |      | H   |    |        |        |        |      |
| ATOM       | 225 | HA   | VAL | 19 | 30.028 | 8.500  | 16.586 | 1.00 |
| 8.08       |     |      | H   |    |        |        |        |      |
| ATOM       | 226 | HB   | VAL | 19 | 29.655 | 6.507  | 15.332 | 1.00 |
| 11.49      |     |      | H   |    |        |        |        |      |
| ATOM       | 227 | HG11 | VAL | 19 | 28.944 | 6.439  | 13.051 |      |
| 1.00137.43 |     |      | H   |    |        |        |        |      |
| ATOM       | 228 | HG12 | VAL | 19 | 29.194 | 8.172  | 12.849 | 1.00 |
| 93.29      |     |      | H   |    |        |        |        |      |
| ATOM       | 229 | HG13 | VAL | 19 | 27.866 | 7.584  | 13.848 |      |
| 1.00108.69 |     |      | H   |    |        |        |        |      |
| ATOM       | 230 | HG21 | VAL | 19 | 31.363 | 8.220  | 13.522 | 1.00 |
| 99.42      |     |      | H   |    |        |        |        |      |
| ATOM       | 231 | HG22 | VAL | 19 | 31.585 | 6.520  | 13.941 |      |
| 1.00111.36 |     |      | H   |    |        |        |        |      |
| ATOM       | 232 | HG23 | VAL | 19 | 31.892 | 7.776  | 15.146 | 1.00 |
| 77.11      |     |      | H   |    |        |        |        |      |
| ATOM       | 233 | N    | PHE | 20 | 30.884 | 10.544 | 15.660 | 1.00 |
| 24.58      |     |      | N   |    |        |        |        |      |
| ATOM       | 234 | CA   | PHE | 20 | 31.467 | 11.787 | 15.187 | 1.00 |
| 40.34      |     |      | C   |    |        |        |        |      |
| ATOM       | 235 | C    | PHE | 20 | 32.816 | 11.530 | 14.532 | 1.00 |
| 40.37      |     |      | C   |    |        |        |        |      |
| ATOM       | 236 | O    | PHE | 20 | 33.047 | 11.929 | 13.390 | 1.00 |
| 66.02      |     |      | O   |    |        |        |        |      |
| ATOM       | 237 | CB   | PHE | 20 | 31.632 | 12.755 | 16.371 | 1.00 |
| 48.79      |     |      | C   |    |        |        |        |      |
| ATOM       | 238 | CG   | PHE | 20 | 31.907 | 11.992 | 17.659 | 1.00 |
| 35.75      |     |      | C   |    |        |        |        |      |
| ATOM       | 239 | CD1  | PHE | 20 | 30.913 | 11.180 | 18.238 | 1.00 |
| 30.20      |     |      | C   |    |        |        |        |      |
| ATOM       | 240 | CD2  | PHE | 20 | 33.155 | 12.112 | 18.285 | 1.00 |
| 40.95      |     |      | C   |    |        |        |        |      |
| ATOM       | 241 | CE1  | PHE | 20 | 31.176 | 10.498 | 19.428 | 1.00 |
| 30.41      |     |      | C   |    |        |        |        |      |
| ATOM       | 242 | CE2  | PHE | 20 | 33.413 | 11.424 | 19.476 | 1.00 |
| 45.84      |     |      | C   |    |        |        |        |      |

|            |     |     |     |    |        |        |        |      |
|------------|-----|-----|-----|----|--------|--------|--------|------|
| ATOM       | 243 | CZ  | PHE | 20 | 32.424 | 10.618 | 20.047 | 1.00 |
| 40.81      |     |     | C   |    |        |        |        |      |
| ATOM       | 244 | HN  | PHE | 20 | 31.158 | 10.183 | 16.518 | 1.00 |
| 16.73      |     |     | H   |    |        |        |        |      |
| ATOM       | 245 | HA  | PHE | 20 | 30.809 | 12.239 | 14.456 | 1.00 |
| 59.91      |     |     | H   |    |        |        |        |      |
| ATOM       | 246 | HB1 | PHE | 20 | 30.733 | 13.311 | 16.485 | 1.00 |
| 67.15      |     |     | H   |    |        |        |        |      |
| ATOM       | 247 | HB2 | PHE | 20 | 32.445 | 13.441 | 16.176 | 1.00 |
| 58.17      |     |     | H   |    |        |        |        |      |
| ATOM       | 248 | HD1 | PHE | 20 | 29.944 | 11.075 | 17.767 | 1.00 |
| 33.34      |     |     | H   |    |        |        |        |      |
| ATOM       | 249 | HD2 | PHE | 20 | 33.921 | 12.733 | 17.847 | 1.00 |
| 49.35      |     |     | H   |    |        |        |        |      |
| ATOM       | 250 | HE1 | PHE | 20 | 30.414 | 9.877  | 19.868 | 1.00 |
| 30.61      |     |     | H   |    |        |        |        |      |
| ATOM       | 251 | HE2 | PHE | 20 | 34.375 | 11.516 | 19.955 | 1.00 |
| 61.27      |     |     | H   |    |        |        |        |      |
| ATOM       | 252 | HZ  | PHE | 20 | 32.623 | 10.088 | 20.967 | 1.00 |
| 52.66      |     |     | H   |    |        |        |        |      |
| ATOM       | 253 | N   | GLU | 21 | 33.715 | 10.894 | 15.275 | 1.00 |
| 41.31      |     |     | N   |    |        |        |        |      |
| ATOM       | 254 | CA  | GLU | 21 | 35.046 | 10.618 | 14.793 | 1.00 |
| 56.16      |     |     | C   |    |        |        |        |      |
| ATOM       | 255 | C   | GLU | 21 | 35.314 | 9.124  | 14.728 | 1.00 |
| 58.61      |     |     | C   |    |        |        |        |      |
| ATOM       | 256 | O   | GLU | 21 | 34.438 | 8.305  | 15.004 |      |
| 1.00201.19 |     |     | O   |    |        |        |        |      |
| ATOM       | 257 | CB  | GLU | 21 | 36.010 | 11.280 | 15.750 | 1.00 |
| 57.37      |     |     | C   |    |        |        |        |      |
| ATOM       | 258 | CG  | GLU | 21 | 35.948 | 10.585 | 17.112 |      |
| 1.00193.56 |     |     | C   |    |        |        |        |      |
| ATOM       | 259 | CD  | GLU | 21 | 36.671 | 11.429 | 18.156 |      |
| 1.00304.62 |     |     | C   |    |        |        |        |      |
| ATOM       | 260 | OE1 | GLU | 21 | 36.600 | 11.081 | 19.323 |      |
| 1.00451.81 |     |     | O   |    |        |        |        |      |
| ATOM       | 261 | OE2 | GLU | 21 | 37.286 | 12.411 | 17.774 |      |
| 1.00442.88 |     |     | O1- |    |        |        |        |      |
| ATOM       | 262 | HN  | GLU | 21 | 33.493 | 10.629 | 16.186 | 1.00 |
| 50.82      |     |     | H   |    |        |        |        |      |
| ATOM       | 263 | HA  | GLU | 21 | 35.185 | 11.046 | 13.810 | 1.00 |
| 85.72      |     |     | H   |    |        |        |        |      |
| ATOM       | 264 | HB1 | GLU | 21 | 35.725 | 12.310 | 15.865 | 1.00 |
| 46.37      |     |     | H   |    |        |        |        |      |
| ATOM       | 265 | HB2 | GLU | 21 | 36.999 | 11.215 | 15.357 |      |
| 1.00131.81 |     |     | H   |    |        |        |        |      |
| ATOM       | 266 | HG1 | GLU | 21 | 36.421 | 9.621  | 17.041 |      |
| 1.00314.91 |     |     | H   |    |        |        |        |      |
| ATOM       | 267 | HG2 | GLU | 21 | 34.918 | 10.455 | 17.401 |      |
| 1.00266.92 |     |     | H   |    |        |        |        |      |
| ATOM       | 268 | N   | GLY | 22 | 36.538 | 8.784  | 14.353 | 1.00 |
| 86.70      |     |     | N   |    |        |        |        |      |

|            |     |     |     |    |        |       |        |      |
|------------|-----|-----|-----|----|--------|-------|--------|------|
| ATOM       | 269 | CA  | GLY | 22 | 36.945 | 7.382 | 14.239 |      |
| 1.00104.66 |     |     |     |    |        |       |        | C    |
| ATOM       | 270 | C   | GLY | 22 | 37.592 | 6.891 | 15.529 | 1.00 |
| 71.50      |     |     | C   |    |        |       |        |      |
| ATOM       | 271 | O   | GLY | 22 | 37.805 | 5.692 | 15.713 | 1.00 |
| 89.87      |     |     | O   |    |        |       |        |      |
| ATOM       | 272 | HN  | GLY | 22 | 37.182 | 9.496 | 14.149 |      |
| 1.00214.64 |     |     |     |    |        |       |        | H    |
| ATOM       | 273 | HA1 | GLY | 22 | 37.657 | 7.285 | 13.431 |      |
| 1.00152.47 |     |     |     |    |        |       |        | H    |
| ATOM       | 274 | HA2 | GLY | 22 | 36.079 | 6.770 | 14.021 |      |
| 1.00118.15 |     |     |     |    |        |       |        | H    |
| ATOM       | 275 | N   | ASP | 23 | 37.911 | 7.825 | 16.414 | 1.00 |
| 44.68      |     |     | N   |    |        |       |        |      |
| ATOM       | 276 | CA  | ASP | 23 | 38.542 | 7.485 | 17.683 | 1.00 |
| 43.33      |     |     | C   |    |        |       |        |      |
| ATOM       | 277 | C   | ASP | 23 | 37.640 | 6.590 | 18.523 | 1.00 |
| 37.55      |     |     | C   |    |        |       |        |      |
| ATOM       | 278 | O   | ASP | 23 | 38.094 | 5.607 | 19.108 | 1.00 |
| 61.37      |     |     | O   |    |        |       |        |      |
| ATOM       | 279 | CB  | ASP | 23 | 38.858 | 8.761 | 18.463 | 1.00 |
| 40.74      |     |     | C   |    |        |       |        |      |
| ATOM       | 280 | CG  | ASP | 23 | 39.679 | 8.425 | 19.704 |      |
| 1.00141.86 |     |     |     |    |        |       |        | C    |
| ATOM       | 281 | OD1 | ASP | 23 | 40.168 | 9.348 | 20.334 |      |
| 1.00328.18 |     |     |     |    |        |       |        | O    |
| ATOM       | 282 | OD2 | ASP | 23 | 39.806 | 7.250 | 20.005 |      |
| 1.00304.58 |     |     |     |    |        |       |        | O1-  |
| ATOM       | 283 | HN  | ASP | 23 | 37.724 | 8.765 | 16.208 | 1.00 |
| 40.86      |     |     | H   |    |        |       |        |      |
| ATOM       | 284 | HA  | ASP | 23 | 39.462 | 6.964 | 17.485 | 1.00 |
| 72.12      |     |     | H   |    |        |       |        |      |
| ATOM       | 285 | HB1 | ASP | 23 | 37.933 | 9.231 | 18.764 | 1.00 |
| 94.15      |     |     | H   |    |        |       |        |      |
| ATOM       | 286 | HB2 | ASP | 23 | 39.415 | 9.438 | 17.833 | 1.00 |
| 93.26      |     |     | H   |    |        |       |        |      |
| ATOM       | 287 | N   | MET | 24 | 36.362 | 6.944 | 18.589 | 1.00 |
| 23.24      |     |     | N   |    |        |       |        |      |
| ATOM       | 288 | CA  | MET | 24 | 35.400 | 6.173 | 19.374 | 1.00 |
| 32.50      |     |     | C   |    |        |       |        |      |
| ATOM       | 289 | C   | MET | 24 | 33.985 | 6.356 | 18.835 | 1.00 |
| 25.13      |     |     | C   |    |        |       |        |      |
| ATOM       | 290 | O   | MET | 24 | 33.617 | 7.439 | 18.380 | 1.00 |
| 54.40      |     |     | O   |    |        |       |        |      |
| ATOM       | 291 | CB  | MET | 24 | 35.451 | 6.622 | 20.836 | 1.00 |
| 47.36      |     |     | C   |    |        |       |        |      |
| ATOM       | 292 | CG  | MET | 24 | 34.467 | 5.797 | 21.667 |      |
| 1.00151.73 |     |     |     |    |        |       |        | C    |
| ATOM       | 293 | SD  | MET | 24 | 34.653 | 6.219 | 23.419 |      |
| 1.00209.23 |     |     |     |    |        |       |        | S    |
| ATOM       | 294 | CE  | MET | 24 | 33.971 | 7.895 | 23.338 |      |
| 1.00243.29 |     |     |     |    |        |       |        | C    |

|            |     |      |     |    |        |       |        |      |
|------------|-----|------|-----|----|--------|-------|--------|------|
| ATOM       | 295 | HN   | MET | 24 | 36.063 | 7.742 | 18.107 | 1.00 |
| 17.32      |     |      | H   |    |        |       |        |      |
| ATOM       | 296 | HA   | MET | 24 | 35.660 | 5.125 | 19.324 | 1.00 |
| 48.94      |     |      | H   |    |        |       |        |      |
| ATOM       | 297 | HB1  | MET | 24 | 35.186 | 7.666 | 20.899 |      |
| 1.00124.40 |     |      | H   |    |        |       |        |      |
| ATOM       | 298 | HB2  | MET | 24 | 36.451 | 6.482 | 21.219 |      |
| 1.00166.96 |     |      | H   |    |        |       |        |      |
| ATOM       | 299 | HG1  | MET | 24 | 34.672 | 4.745 | 21.528 |      |
| 1.00331.71 |     |      | H   |    |        |       |        |      |
| ATOM       | 300 | HG2  | MET | 24 | 33.456 | 6.009 | 21.352 |      |
| 1.00302.30 |     |      | H   |    |        |       |        |      |
| ATOM       | 301 | HE1  | MET | 24 | 33.622 | 8.188 | 24.319 |      |
| 1.00340.44 |     |      | H   |    |        |       |        |      |
| ATOM       | 302 | HE2  | MET | 24 | 33.147 | 7.920 | 22.645 |      |
| 1.00373.88 |     |      | H   |    |        |       |        |      |
| ATOM       | 303 | HE3  | MET | 24 | 34.740 | 8.581 | 23.007 |      |
| 1.00386.81 |     |      | H   |    |        |       |        |      |
| ATOM       | 304 | N    | VAL | 25 | 33.190 | 5.287 | 18.900 | 1.00 |
| 22.44      |     |      | N   |    |        |       |        |      |
| ATOM       | 305 | CA   | VAL | 25 | 31.804 | 5.323 | 18.428 | 1.00 |
| 15.37      |     |      | C   |    |        |       |        |      |
| ATOM       | 306 | C    | VAL | 25 | 30.844 | 5.396 | 19.610 | 1.00 |
| 17.47      |     |      | C   |    |        |       |        |      |
| ATOM       | 307 | O    | VAL | 25 | 31.118 | 4.865 | 20.686 | 1.00 |
| 29.52      |     |      | O   |    |        |       |        |      |
| ATOM       | 308 | CB   | VAL | 25 | 31.494 | 4.078 | 17.591 | 1.00 |
| 23.36      |     |      | C   |    |        |       |        |      |
| ATOM       | 309 | CG1  | VAL | 25 | 29.990 | 4.035 | 17.258 | 1.00 |
| 58.39      |     |      | C   |    |        |       |        |      |
| ATOM       | 310 | CG2  | VAL | 25 | 32.312 | 4.128 | 16.297 | 1.00 |
| 55.25      |     |      | C   |    |        |       |        |      |
| ATOM       | 311 | HN   | VAL | 25 | 33.542 | 4.455 | 19.280 | 1.00 |
| 48.11      |     |      | H   |    |        |       |        |      |
| ATOM       | 312 | HA   | VAL | 25 | 31.656 | 6.201 | 17.809 | 1.00 |
| 9.25       |     |      | H   |    |        |       |        |      |
| ATOM       | 313 | HB   | VAL | 25 | 31.762 | 3.194 | 18.153 | 1.00 |
| 52.45      |     |      | H   |    |        |       |        |      |
| ATOM       | 314 | HG11 | VAL | 25 | 29.623 | 5.040 | 17.105 |      |
| 1.00171.07 |     |      | H   |    |        |       |        |      |
| ATOM       | 315 | HG12 | VAL | 25 | 29.455 | 3.582 | 18.078 |      |
| 1.00166.22 |     |      | H   |    |        |       |        |      |
| ATOM       | 316 | HG13 | VAL | 25 | 29.831 | 3.454 | 16.361 |      |
| 1.00134.76 |     |      | H   |    |        |       |        |      |
| ATOM       | 317 | HG21 | VAL | 25 | 31.951 | 4.933 | 15.674 |      |
| 1.00141.88 |     |      | H   |    |        |       |        |      |
| ATOM       | 318 | HG22 | VAL | 25 | 32.212 | 3.191 | 15.770 |      |
| 1.00184.50 |     |      | H   |    |        |       |        |      |
| ATOM       | 319 | HG23 | VAL | 25 | 33.353 | 4.299 | 16.534 |      |
| 1.00133.90 |     |      | H   |    |        |       |        |      |
| ATOM       | 320 | N    | THR | 26 | 29.719 | 6.079 | 19.402 | 1.00 |
| 13.60      |     |      | N   |    |        |       |        |      |

|            |     |      |     |    |        |        |        |      |
|------------|-----|------|-----|----|--------|--------|--------|------|
| ATOM       | 321 | CA   | THR | 26 | 28.708 | 6.251  | 20.447 | 1.00 |
| 21.19      |     |      | C   |    |        |        |        |      |
| ATOM       | 322 | C    | THR | 26 | 27.343 | 5.749  | 19.987 | 1.00 |
| 16.55      |     |      | C   |    |        |        |        |      |
| ATOM       | 323 | O    | THR | 26 | 26.942 | 5.959  | 18.841 | 1.00 |
| 11.43      |     |      | O   |    |        |        |        |      |
| ATOM       | 324 | CB   | THR | 26 | 28.611 | 7.732  | 20.802 | 1.00 |
| 27.07      |     |      | C   |    |        |        |        |      |
| ATOM       | 325 | CG2  | THR | 26 | 27.507 | 7.950  | 21.840 | 1.00 |
| 44.39      |     |      | C   |    |        |        |        |      |
| ATOM       | 326 | OG1  | THR | 26 | 29.856 | 8.162  | 21.335 | 1.00 |
| 34.75      |     |      | O   |    |        |        |        |      |
| ATOM       | 327 | HN   | THR | 26 | 29.567 | 6.488  | 18.524 | 1.00 |
| 10.81      |     |      | H   |    |        |        |        |      |
| ATOM       | 328 | HA   | THR | 26 | 29.000 | 5.703  | 21.332 | 1.00 |
| 33.16      |     |      | H   |    |        |        |        |      |
| ATOM       | 329 | HB   | THR | 26 | 28.385 | 8.296  | 19.907 | 1.00 |
| 20.60      |     |      | H   |    |        |        |        |      |
| ATOM       | 330 | HG1  | THR | 26 | 30.221 | 7.442  | 21.855 | 1.00 |
| 77.72      |     |      | H   |    |        |        |        |      |
| ATOM       | 331 | HG21 | THR | 26 | 27.565 | 8.960  | 22.219 |      |
| 1.00126.99 |     |      | H   |    |        |        |        |      |
| ATOM       | 332 | HG22 | THR | 26 | 27.636 | 7.254  | 22.654 |      |
| 1.00108.32 |     |      | H   |    |        |        |        |      |
| ATOM       | 333 | HG23 | THR | 26 | 26.542 | 7.793  | 21.382 |      |
| 1.00151.99 |     |      | H   |    |        |        |        |      |
| ATOM       | 334 | N    | ARG | 27 | 26.629 | 5.088  | 20.897 | 1.00 |
| 22.38      |     |      | N   |    |        |        |        |      |
| ATOM       | 335 | CA   | ARG | 27 | 25.299 | 4.557  | 20.600 | 1.00 |
| 20.21      |     |      | C   |    |        |        |        |      |
| ATOM       | 336 | C    | ARG | 27 | 24.421 | 4.636  | 21.846 | 1.00 |
| 16.96      |     |      | C   |    |        |        |        |      |
| ATOM       | 337 | O    | ARG | 27 | 24.930 | 4.758  | 22.960 | 1.00 |
| 20.06      |     |      | O   |    |        |        |        |      |
| ATOM       | 338 | CB   | ARG | 27 | 25.408 | 3.102  | 20.137 | 1.00 |
| 22.14      |     |      | C   |    |        |        |        |      |
| ATOM       | 339 | CG   | ARG | 27 | 25.925 | 2.237  | 21.288 |      |
| 1.00124.30 |     |      | C   |    |        |        |        |      |
| ATOM       | 340 | CD   | ARG | 27 | 26.299 | 0.852  | 20.758 |      |
| 1.00109.38 |     |      | C   |    |        |        |        |      |
| ATOM       | 341 | NE   | ARG | 27 | 27.454 | 0.945  | 19.873 |      |
| 1.00227.73 |     |      | N   |    |        |        |        |      |
| ATOM       | 342 | CZ   | ARG | 27 | 27.841 | -0.092 | 19.138 |      |
| 1.00426.12 |     |      | C   |    |        |        |        |      |
| ATOM       | 343 | NH1  | ARG | 27 | 28.878 | 0.015  | 18.352 |      |
| 1.00767.09 |     |      | N1+ |    |        |        |        |      |
| ATOM       | 344 | NH2  | ARG | 27 | 27.184 | -1.216 | 19.199 |      |
| 1.00581.78 |     |      | N   |    |        |        |        |      |
| ATOM       | 345 | HN   | ARG | 27 | 27.004 | 4.960  | 21.793 | 1.00 |
| 30.75      |     |      | H   |    |        |        |        |      |
| ATOM       | 346 | HA   | ARG | 27 | 24.844 | 5.142  | 19.813 | 1.00 |
| 23.13      |     |      | H   |    |        |        |        |      |

|            |     |      |     |    |        |        |        |      |
|------------|-----|------|-----|----|--------|--------|--------|------|
| ATOM       | 347 | HB1  | ARG | 27 | 26.095 | 3.040  | 19.306 | 1.00 |
| 87.46      |     | H    |     |    |        |        |        |      |
| ATOM       | 348 | HB2  | ARG | 27 | 24.436 | 2.750  | 19.828 |      |
| 1.00103.36 |     | H    |     |    |        |        |        |      |
| ATOM       | 349 | HG1  | ARG | 27 | 25.154 | 2.137  | 22.037 |      |
| 1.00281.97 |     | H    |     |    |        |        |        |      |
| ATOM       | 350 | HG2  | ARG | 27 | 26.796 | 2.703  | 21.726 |      |
| 1.00276.19 |     | H    |     |    |        |        |        |      |
| ATOM       | 351 | HD1  | ARG | 27 | 25.461 | 0.440  | 20.215 |      |
| 1.00183.60 |     | H    |     |    |        |        |        |      |
| ATOM       | 352 | HD2  | ARG | 27 | 26.536 | 0.204  | 21.588 |      |
| 1.00142.93 |     | H    |     |    |        |        |        |      |
| ATOM       | 353 | HE   | ARG | 27 | 27.953 | 1.787  | 19.819 |      |
| 1.00372.53 |     | H    |     |    |        |        |        |      |
| ATOM       | 354 | HH11 | ARG | 27 | 29.382 | 0.879  | 18.305 |      |
| 1.00910.59 |     | H    |     |    |        |        |        |      |
| ATOM       | 355 | HH12 | ARG | 27 | 29.169 | -0.764 | 17.799 |      |
| 1.00999.99 |     | H    |     |    |        |        |        |      |
| ATOM       | 356 | HH21 | ARG | 27 | 26.388 | -1.300 | 19.800 |      |
| 1.00532.54 |     | H    |     |    |        |        |        |      |
| ATOM       | 357 | HH22 | ARG | 27 | 27.474 | -1.998 | 18.645 |      |
| 1.00948.84 |     | H    |     |    |        |        |        |      |
| ATOM       | 358 | N    | SER | 28 | 23.103 | 4.574  | 21.658 | 1.00 |
| 14.60      |     | N    |     |    |        |        |        |      |
| ATOM       | 359 | CA   | SER | 28 | 22.177 | 4.650  | 22.788 | 1.00 |
| 14.92      |     | C    |     |    |        |        |        |      |
| ATOM       | 360 | C    | SER | 28 | 20.904 | 3.868  | 22.498 | 1.00 |
| 12.12      |     | C    |     |    |        |        |        |      |
| ATOM       | 361 | O    | SER | 28 | 20.597 | 3.563  | 21.346 | 1.00 |
| 13.41      |     | O    |     |    |        |        |        |      |
| ATOM       | 362 | CB   | SER | 28 | 21.826 | 6.110  | 23.073 | 1.00 |
| 23.26      |     | C    |     |    |        |        |        |      |
| ATOM       | 363 | OG   | SER | 28 | 21.094 | 6.639  | 21.975 |      |
| 1.00146.32 |     | O    |     |    |        |        |        |      |
| ATOM       | 364 | HN   | SER | 28 | 22.746 | 4.482  | 20.747 | 1.00 |
| 15.23      |     | H    |     |    |        |        |        |      |
| ATOM       | 365 | HA   | SER | 28 | 22.650 | 4.231  | 23.665 | 1.00 |
| 15.44      |     | H    |     |    |        |        |        |      |
| ATOM       | 366 | HB1  | SER | 28 | 22.736 | 6.677  | 23.216 | 1.00 |
| 88.73      |     | H    |     |    |        |        |        |      |
| ATOM       | 367 | HB2  | SER | 28 | 21.222 | 6.171  | 23.963 |      |
| 1.00124.68 |     | H    |     |    |        |        |        |      |
| ATOM       | 368 | HG   | SER | 28 | 20.159 | 6.596  | 22.193 |      |
| 1.00242.47 |     | H    |     |    |        |        |        |      |
| ATOM       | 369 | N    | CYS | 29 | 20.163 | 3.550  | 23.555 | 1.00 |
| 10.48      |     | N    |     |    |        |        |        |      |
| ATOM       | 370 | CA   | CYS | 29 | 18.919 | 2.808  | 23.407 | 1.00 |
| 9.97       |     | C    |     |    |        |        |        |      |
| ATOM       | 371 | C    | CYS | 29 | 18.157 | 2.798  | 24.731 | 1.00 |
| 11.60      |     | C    |     |    |        |        |        |      |
| ATOM       | 372 | O    | CYS | 29 | 18.709 | 2.449  | 25.774 | 1.00 |
| 15.64      |     | O    |     |    |        |        |        |      |

|            |     |     |     |    |        |        |        |      |
|------------|-----|-----|-----|----|--------|--------|--------|------|
| ATOM       | 373 | CB  | CYS | 29 | 19.216 | 1.370  | 22.949 | 1.00 |
| 9.52       |     |     | C   |    |        |        |        |      |
| ATOM       | 374 | SG  | CYS | 29 | 17.828 | 0.738  | 21.996 | 1.00 |
| 10.40      |     |     | S   |    |        |        |        |      |
| ATOM       | 375 | HN  | CYS | 29 | 20.454 | 3.826  | 24.448 | 1.00 |
| 11.10      |     |     | H   |    |        |        |        |      |
| ATOM       | 376 | HA  | CYS | 29 | 18.312 | 3.295  | 22.662 | 1.00 |
| 11.08      |     |     | H   |    |        |        |        |      |
| ATOM       | 377 | HB1 | CYS | 29 | 19.372 | 0.729  | 23.805 | 1.00 |
| 9.33       |     |     | H   |    |        |        |        |      |
| ATOM       | 378 | HB2 | CYS | 29 | 20.100 | 1.361  | 22.330 | 1.00 |
| 10.78      |     |     | H   |    |        |        |        |      |
| ATOM       | 379 | N   | GLU | 30 | 16.890 | 3.195  | 24.682 | 1.00 |
| 13.52      |     |     | N   |    |        |        |        |      |
| ATOM       | 380 | CA  | GLU | 30 | 16.067 | 3.240  | 25.885 | 1.00 |
| 17.41      |     |     | C   |    |        |        |        |      |
| ATOM       | 381 | C   | GLU | 30 | 15.627 | 1.842  | 26.303 | 1.00 |
| 10.81      |     |     | C   |    |        |        |        |      |
| ATOM       | 382 | O   | GLU | 30 | 15.482 | 0.949  | 25.470 | 1.00 |
| 23.22      |     |     | O   |    |        |        |        |      |
| ATOM       | 383 | CB  | GLU | 30 | 14.830 | 4.102  | 25.643 | 1.00 |
| 37.83      |     |     | C   |    |        |        |        |      |
| ATOM       | 384 | CG  | GLU | 30 | 15.257 | 5.523  | 25.283 |      |
| 1.00108.13 |     |     | C   |    |        |        |        |      |
| ATOM       | 385 | CD  | GLU | 30 | 15.909 | 6.192  | 26.488 |      |
| 1.00240.52 |     |     | C   |    |        |        |        |      |
| ATOM       | 386 | OE1 | GLU | 30 | 15.760 | 5.672  | 27.582 |      |
| 1.00422.56 |     |     | O   |    |        |        |        |      |
| ATOM       | 387 | OE2 | GLU | 30 | 16.545 | 7.216  | 26.302 |      |
| 1.00410.81 |     |     | O1- |    |        |        |        |      |
| ATOM       | 388 | HN  | GLU | 30 | 16.504 | 3.470  | 23.824 | 1.00 |
| 15.61      |     |     | H   |    |        |        |        |      |
| ATOM       | 389 | HA  | GLU | 30 | 16.642 | 3.678  | 26.686 | 1.00 |
| 24.60      |     |     | H   |    |        |        |        |      |
| ATOM       | 390 | HB1 | GLU | 30 | 14.226 | 4.125  | 26.538 | 1.00 |
| 72.67      |     |     | H   |    |        |        |        |      |
| ATOM       | 391 | HB2 | GLU | 30 | 14.252 | 3.682  | 24.831 | 1.00 |
| 56.47      |     |     | H   |    |        |        |        |      |
| ATOM       | 392 | HG1 | GLU | 30 | 14.390 | 6.090  | 24.984 |      |
| 1.00196.66 |     |     | H   |    |        |        |        |      |
| ATOM       | 393 | HG2 | GLU | 30 | 15.963 | 5.489  | 24.466 |      |
| 1.00140.67 |     |     | H   |    |        |        |        |      |
| ATOM       | 394 | N   | LYS | 31 | 15.403 | 1.671  | 27.605 | 1.00 |
| 11.96      |     |     | N   |    |        |        |        |      |
| ATOM       | 395 | CA  | LYS | 31 | 14.961 | 0.387  | 28.149 | 1.00 |
| 11.40      |     |     | C   |    |        |        |        |      |
| ATOM       | 396 | C   | LYS | 31 | 13.720 | 0.587  | 29.008 | 1.00 |
| 10.99      |     |     | C   |    |        |        |        |      |
| ATOM       | 397 | O   | LYS | 31 | 13.629 | 1.548  | 29.770 | 1.00 |
| 12.86      |     |     | O   |    |        |        |        |      |
| ATOM       | 398 | CB  | LYS | 31 | 16.067 | -0.235 | 29.001 | 1.00 |
| 21.40      |     |     | C   |    |        |        |        |      |



|            |     |     |     |    |        |        |        |      |
|------------|-----|-----|-----|----|--------|--------|--------|------|
| ATOM       | 399 | CG  | LYS | 31 | 17.314 | -0.457 | 28.140 | 1.00 |
| 57.81      |     |     | C   |    |        |        |        |      |
| ATOM       | 400 | CD  | LYS | 31 | 18.338 | -1.311 | 28.899 |      |
| 1.00115.52 |     |     | C   |    |        |        |        |      |
| ATOM       | 401 | CE  | LYS | 31 | 18.968 | -0.494 | 30.031 |      |
| 1.00250.23 |     |     | C   |    |        |        |        |      |
| ATOM       | 402 | NZ  | LYS | 31 | 20.118 | -1.250 | 30.604 |      |
| 1.00462.10 |     |     | N1+ |    |        |        |        |      |
| ATOM       | 403 | HN  | LYS | 31 | 15.528 | 2.428  | 28.214 | 1.00 |
| 26.13      |     |     | H   |    |        |        |        |      |
| ATOM       | 404 | HA  | LYS | 31 | 14.720 | -0.290 | 27.343 | 1.00 |
| 13.87      |     |     | H   |    |        |        |        |      |
| ATOM       | 405 | HB1 | LYS | 31 | 15.728 | -1.181 | 29.396 | 1.00 |
| 37.63      |     |     | H   |    |        |        |        |      |
| ATOM       | 406 | HB2 | LYS | 31 | 16.299 | 0.432  | 29.815 | 1.00 |
| 47.19      |     |     | H   |    |        |        |        |      |
| ATOM       | 407 | HG1 | LYS | 31 | 17.754 | 0.497  | 27.895 |      |
| 1.00126.32 |     |     | H   |    |        |        |        |      |
| ATOM       | 408 | HG2 | LYS | 31 | 17.032 | -0.965 | 27.227 |      |
| 1.00114.19 |     |     | H   |    |        |        |        |      |
| ATOM       | 409 | HD1 | LYS | 31 | 19.111 | -1.631 | 28.218 |      |
| 1.00198.45 |     |     | H   |    |        |        |        |      |
| ATOM       | 410 | HD2 | LYS | 31 | 17.845 | -2.177 | 29.313 |      |
| 1.00200.14 |     |     | H   |    |        |        |        |      |
| ATOM       | 411 | HE1 | LYS | 31 | 18.235 | -0.322 | 30.806 |      |
| 1.00374.64 |     |     | H   |    |        |        |        |      |
| ATOM       | 412 | HE2 | LYS | 31 | 19.316 | 0.453  | 29.645 |      |
| 1.00403.27 |     |     | H   |    |        |        |        |      |
| ATOM       | 413 | HZ1 | LYS | 31 | 19.917 | -1.491 | 31.594 |      |
| 1.00627.38 |     |     | H   |    |        |        |        |      |
| ATOM       | 414 | HZ2 | LYS | 31 | 20.976 | -0.662 | 30.557 |      |
| 1.00622.26 |     |     | H   |    |        |        |        |      |
| ATOM       | 415 | HZ3 | LYS | 31 | 20.265 | -2.123 | 30.060 |      |
| 1.00619.20 |     |     | H   |    |        |        |        |      |
| ATOM       | 416 | N   | THR | 32 | 12.769 | -0.326 | 28.880 | 1.00 |
| 15.51      |     |     | N   |    |        |        |        |      |
| ATOM       | 417 | CA  | THR | 32 | 11.534 | -0.239 | 29.651 | 1.00 |
| 22.44      |     |     | C   |    |        |        |        |      |
| ATOM       | 418 | C   | THR | 32 | 11.801 | -0.555 | 31.119 | 1.00 |
| 26.60      |     |     | C   |    |        |        |        |      |
| ATOM       | 419 | O   | THR | 32 | 11.378 | -1.592 | 31.630 | 1.00 |
| 57.43      |     |     | O   |    |        |        |        |      |
| ATOM       | 420 | CB  | THR | 32 | 10.496 | -1.214 | 29.092 | 1.00 |
| 56.28      |     |     | C   |    |        |        |        |      |
| ATOM       | 421 | CG2 | THR | 32 | 10.397 | -1.045 | 27.576 |      |
| 1.00102.70 |     |     | C   |    |        |        |        |      |
| ATOM       | 422 | OG1 | THR | 32 | 10.884 | -2.546 | 29.400 |      |
| 1.00111.17 |     |     | O   |    |        |        |        |      |
| ATOM       | 423 | HN  | THR | 32 | 12.898 | -1.068 | 28.255 | 1.00 |
| 18.79      |     |     | H   |    |        |        |        |      |
| ATOM       | 424 | HA  | THR | 32 | 11.147 | 0.767  | 29.575 | 1.00 |
| 19.67      |     |     | H   |    |        |        |        |      |

|            |     |      |     |    |        |        |        |      |
|------------|-----|------|-----|----|--------|--------|--------|------|
| ATOM       | 425 | HB   | THR | 32 | 9.534  | -1.008 | 29.536 | 1.00 |
| 84.25      |     |      | H   |    |        |        |        |      |
| ATOM       | 426 | HG1  | THR | 32 | 10.258 | -3.141 | 28.982 |      |
| 1.00205.03 |     |      | H   |    |        |        |        |      |
| ATOM       | 427 | HG21 | THR | 32 | 11.366 | -1.219 | 27.131 |      |
| 1.00220.71 |     |      | H   |    |        |        |        |      |
| ATOM       | 428 | HG22 | THR | 32 | 10.071 | -0.042 | 27.346 |      |
| 1.00174.67 |     |      | H   |    |        |        |        |      |
| ATOM       | 429 | HG23 | THR | 32 | 9.686  | -1.755 | 27.180 |      |
| 1.00217.44 |     |      | H   |    |        |        |        |      |
| ATOM       | 430 | N    | THR | 33 | 12.502 | 0.352  | 31.792 | 1.00 |
| 22.47      |     |      | N   |    |        |        |        |      |
| ATOM       | 431 | CA   | THR | 33 | 12.819 | 0.172  | 33.206 | 1.00 |
| 41.60      |     |      | C   |    |        |        |        |      |
| ATOM       | 432 | C    | THR | 33 | 11.626 | 0.508  | 34.050 | 1.00 |
| 38.03      |     |      | C   |    |        |        |        |      |
| ATOM       | 433 | O    | THR | 33 | 11.721 | 1.195  | 35.066 | 1.00 |
| 52.73      |     |      | O   |    |        |        |        |      |
| ATOM       | 434 | CB   | THR | 33 | 13.992 | 1.062  | 33.592 | 1.00 |
| 63.25      |     |      | C   |    |        |        |        |      |
| ATOM       | 435 | CG2  | THR | 33 | 14.624 | 0.572  | 34.899 |      |
| 1.00121.65 |     |      | C   |    |        |        |        |      |
| ATOM       | 436 | OG1  | THR | 33 | 14.964 | 1.038  | 32.555 | 1.00 |
| 96.20      |     |      | O   |    |        |        |        |      |
| ATOM       | 437 | HN   | THR | 33 | 12.807 | 1.162  | 31.332 | 1.00 |
| 23.82      |     |      | H   |    |        |        |        |      |
| ATOM       | 438 | HA   | THR | 33 | 13.064 | -0.854 | 33.394 | 1.00 |
| 67.12      |     |      | H   |    |        |        |        |      |
| ATOM       | 439 | HB   | THR | 33 | 13.630 | 2.066  | 33.723 |      |
| 1.00107.59 |     |      | H   |    |        |        |        |      |
| ATOM       | 440 | HG1  | THR | 33 | 15.136 | 0.122  | 32.330 |      |
| 1.00176.27 |     |      | H   |    |        |        |        |      |
| ATOM       | 441 | HG21 | THR | 33 | 13.915 | 0.680  | 35.706 |      |
| 1.00255.23 |     |      | H   |    |        |        |        |      |
| ATOM       | 442 | HG22 | THR | 33 | 15.505 | 1.158  | 35.114 |      |
| 1.00245.37 |     |      | H   |    |        |        |        |      |
| ATOM       | 443 | HG23 | THR | 33 | 14.899 | -0.468 | 34.798 |      |
| 1.00185.78 |     |      | H   |    |        |        |        |      |
| ATOM       | 444 | N    | GLY | 34 | 10.502 | 0.003  | 33.614 | 1.00 |
| 40.93      |     |      | N   |    |        |        |        |      |
| ATOM       | 445 | CA   | GLY | 34 | 9.266  | 0.223  | 34.323 | 1.00 |
| 45.59      |     |      | C   |    |        |        |        |      |
| ATOM       | 446 | C    | GLY | 34 | 8.677  | 1.574  | 33.943 | 1.00 |
| 40.97      |     |      | C   |    |        |        |        |      |
| ATOM       | 447 | O    | GLY | 34 | 7.603  | 1.956  | 34.410 | 1.00 |
| 82.17      |     |      | O   |    |        |        |        |      |
| ATOM       | 448 | HN   | GLY | 34 | 10.513 | -0.531 | 32.803 | 1.00 |
| 54.00      |     |      | H   |    |        |        |        |      |
| ATOM       | 449 | HA1  | GLY | 34 | 9.477  | 0.201  | 35.376 | 1.00 |
| 54.41      |     |      | H   |    |        |        |        |      |
| ATOM       | 450 | HA2  | GLY | 34 | 8.565  | -0.563 | 34.076 | 1.00 |
| 62.09      |     |      | H   |    |        |        |        |      |

|            |     |      |     |    |        |       |        |      |
|------------|-----|------|-----|----|--------|-------|--------|------|
| ATOM       | 451 | N    | ASN | 35 | 9.394  | 2.284 | 33.075 | 1.00 |
| 32.51      |     |      | N   |    |        |       |        |      |
| ATOM       | 452 | CA   | ASN | 35 | 8.957  | 3.593 | 32.602 | 1.00 |
| 33.20      |     |      | C   |    |        |       |        |      |
| ATOM       | 453 | C    | ASN | 35 | 9.463  | 3.823 | 31.183 | 1.00 |
| 23.17      |     |      | C   |    |        |       |        |      |
| ATOM       | 454 | O    | ASN | 35 | 10.575 | 3.419 | 30.838 | 1.00 |
| 27.01      |     |      | O   |    |        |       |        |      |
| ATOM       | 455 | CB   | ASN | 35 | 9.490  | 4.693 | 33.521 | 1.00 |
| 54.51      |     |      | C   |    |        |       |        |      |
| ATOM       | 456 | CG   | ASN | 35 | 8.988  | 4.472 | 34.944 | 1.00 |
| 80.73      |     |      | C   |    |        |       |        |      |
| ATOM       | 457 | ND2  | ASN | 35 | 9.825  | 4.561 | 35.942 |      |
| 1.00220.46 |     |      | N   |    |        |       |        |      |
| ATOM       | 458 | OD1  | ASN | 35 | 7.804  | 4.208 | 35.152 |      |
| 1.00117.80 |     |      | O   |    |        |       |        |      |
| ATOM       | 459 | HN   | ASN | 35 | 10.235 | 1.913 | 32.739 | 1.00 |
| 51.15      |     |      | H   |    |        |       |        |      |
| ATOM       | 460 | HA   | ASN | 35 | 7.877  | 3.631 | 32.600 | 1.00 |
| 47.21      |     |      | H   |    |        |       |        |      |
| ATOM       | 461 | HB1  | ASN | 35 | 9.143  | 5.652 | 33.165 | 1.00 |
| 68.31      |     |      | H   |    |        |       |        |      |
| ATOM       | 462 | HB2  | ASN | 35 | 10.569 | 4.674 | 33.512 | 1.00 |
| 57.75      |     |      | H   |    |        |       |        |      |
| ATOM       | 463 | HD21 | ASN | 35 | 10.768 | 4.769 | 35.773 |      |
| 1.00405.39 |     |      | H   |    |        |       |        |      |
| ATOM       | 464 | HD22 | ASN | 35 | 9.511  | 4.420 | 36.859 |      |
| 1.00245.64 |     |      | H   |    |        |       |        |      |
| ATOM       | 465 | N    | PHE | 36 | 8.639  | 4.467 | 30.359 | 1.00 |
| 35.72      |     |      | N   |    |        |       |        |      |
| ATOM       | 466 | CA   | PHE | 36 | 9.003  | 4.740 | 28.976 | 1.00 |
| 33.41      |     |      | C   |    |        |       |        |      |
| ATOM       | 467 | C    | PHE | 36 | 9.627  | 6.126 | 28.848 | 1.00 |
| 28.51      |     |      | C   |    |        |       |        |      |
| ATOM       | 468 | O    | PHE | 36 | 9.144  | 7.092 | 29.439 | 1.00 |
| 45.23      |     |      | O   |    |        |       |        |      |
| ATOM       | 469 | CB   | PHE | 36 | 7.746  | 4.664 | 28.117 | 1.00 |
| 67.53      |     |      | C   |    |        |       |        |      |
| ATOM       | 470 | CG   | PHE | 36 | 7.226  | 3.248 | 28.115 | 1.00 |
| 86.71      |     |      | C   |    |        |       |        |      |
| ATOM       | 471 | CD1  | PHE | 36 | 6.330  | 2.834 | 29.106 |      |
| 1.00106.51 |     |      | C   |    |        |       |        |      |
| ATOM       | 472 | CD2  | PHE | 36 | 7.638  | 2.350 | 27.123 | 1.00 |
| 99.48      |     |      | C   |    |        |       |        |      |
| ATOM       | 473 | CE1  | PHE | 36 | 5.844  | 1.521 | 29.107 |      |
| 1.00134.48 |     |      | C   |    |        |       |        |      |
| ATOM       | 474 | CE2  | PHE | 36 | 7.152  | 1.038 | 27.124 |      |
| 1.00134.27 |     |      | C   |    |        |       |        |      |
| ATOM       | 475 | CZ   | PHE | 36 | 6.255  | 0.623 | 28.115 |      |
| 1.00149.48 |     |      | C   |    |        |       |        |      |
| ATOM       | 476 | HN   | PHE | 36 | 7.765  | 4.759 | 30.683 | 1.00 |
| 62.87      |     |      | H   |    |        |       |        |      |

|      |            |      |     |    |        |        |        |      |
|------|------------|------|-----|----|--------|--------|--------|------|
| ATOM | 477        | HA   | PHE | 36 | 9.708  | 3.998  | 28.630 | 1.00 |
|      | 28.53      |      | H   |    |        |        |        |      |
| ATOM | 478        | HB1  | PHE | 36 | 7.982  | 4.963  | 27.115 | 1.00 |
|      | 73.56      |      | H   |    |        |        |        |      |
| ATOM | 479        | HB2  | PHE | 36 | 6.994  | 5.325  | 28.523 | 1.00 |
|      | 88.42      |      | H   |    |        |        |        |      |
| ATOM | 480        | HD1  | PHE | 36 | 6.013  | 3.528  | 29.873 |      |
|      | 1.00110.20 |      | H   |    |        |        |        |      |
| ATOM | 481        | HD2  | PHE | 36 | 8.330  | 2.670  | 26.359 | 1.00 |
|      | 93.07      |      | H   |    |        |        |        |      |
| ATOM | 482        | HE1  | PHE | 36 | 5.150  | 1.201  | 29.871 |      |
|      | 1.00155.06 |      | H   |    |        |        |        |      |
| ATOM | 483        | HE2  | PHE | 36 | 7.469  | 0.344  | 26.359 |      |
|      | 1.00159.46 |      | H   |    |        |        |        |      |
| ATOM | 484        | HZ   | PHE | 36 | 5.880  | -0.390 | 28.114 |      |
|      | 1.00183.25 |      | H   |    |        |        |        |      |
| ATOM | 485        | N    | THR | 37 | 10.706 | 6.216  | 28.070 | 1.00 |
|      | 20.06      |      | N   |    |        |        |        |      |
| ATOM | 486        | CA   | THR | 37 | 11.399 | 7.480  | 27.859 | 1.00 |
|      | 27.18      |      | C   |    |        |        |        |      |
| ATOM | 487        | C    | THR | 37 | 11.694 | 7.662  | 26.377 | 1.00 |
|      | 41.87      |      | C   |    |        |        |        |      |
| ATOM | 488        | O    | THR | 37 | 10.958 | 7.174  | 25.521 |      |
|      | 1.00169.86 |      | O   |    |        |        |        |      |
| ATOM | 489        | CB   | THR | 37 | 12.710 | 7.491  | 28.649 | 1.00 |
|      | 26.52      |      | C   |    |        |        |        |      |
| ATOM | 490        | CG2  | THR | 37 | 12.451 | 7.007  | 30.076 | 1.00 |
|      | 75.69      |      | C   |    |        |        |        |      |
| ATOM | 491        | OG1  | THR | 37 | 13.646 | 6.629  | 28.018 | 1.00 |
|      | 81.95      |      | O   |    |        |        |        |      |
| ATOM | 492        | HN   | THR | 37 | 11.046 | 5.417  | 27.625 | 1.00 |
|      | 18.47      |      | H   |    |        |        |        |      |
| ATOM | 493        | HA   | THR | 37 | 10.779 | 8.299  | 28.196 | 1.00 |
|      | 38.80      |      | H   |    |        |        |        |      |
| ATOM | 494        | HB   | THR | 37 | 13.104 | 8.494  | 28.678 | 1.00 |
|      | 81.60      |      | H   |    |        |        |        |      |
| ATOM | 495        | HG1  | THR | 37 | 13.454 | 6.621  | 27.078 |      |
|      | 1.00188.80 |      | H   |    |        |        |        |      |
| ATOM | 496        | HG21 | THR | 37 | 13.332 | 7.174  | 30.678 |      |
|      | 1.00196.98 |      | H   |    |        |        |        |      |
| ATOM | 497        | HG22 | THR | 37 | 12.219 | 5.953  | 30.062 |      |
|      | 1.00196.23 |      | H   |    |        |        |        |      |
| ATOM | 498        | HG23 | THR | 37 | 11.620 | 7.554  | 30.498 |      |
|      | 1.00168.92 |      | H   |    |        |        |        |      |
| ATOM | 499        | N    | GLU | 38 | 12.777 | 8.368  | 26.086 | 1.00 |
|      | 26.53      |      | N   |    |        |        |        |      |
| ATOM | 500        | CA   | GLU | 38 | 13.181 | 8.621  | 24.701 | 1.00 |
|      | 30.29      |      | C   |    |        |        |        |      |
| ATOM | 501        | C    | GLU | 38 | 14.702 | 8.630  | 24.574 | 1.00 |
|      | 25.39      |      | C   |    |        |        |        |      |
| ATOM | 502        | O    | GLU | 38 | 15.407 | 9.119  | 25.457 | 1.00 |
|      | 51.60      |      | O   |    |        |        |        |      |

|            |     |     |     |    |        |        |        |      |
|------------|-----|-----|-----|----|--------|--------|--------|------|
| ATOM       | 503 | CB  | GLU | 38 | 12.630 | 9.970  | 24.229 | 1.00 |
| 54.82      |     |     | C   |    |        |        |        |      |
| ATOM       | 504 | CG  | GLU | 38 | 11.102 | 9.912  | 24.157 |      |
| 1.00165.84 |     |     | C   |    |        |        |        |      |
| ATOM       | 505 | CD  | GLU | 38 | 10.555 | 11.242 | 23.650 |      |
| 1.00292.92 |     |     | C   |    |        |        |        |      |
| ATOM       | 506 | OE1 | GLU | 38 | 11.342 | 12.160 | 23.485 |      |
| 1.00414.19 |     |     | O   |    |        |        |        |      |
| ATOM       | 507 | OE2 | GLU | 38 | 9.356  | 11.324 | 23.436 |      |
| 1.00537.65 |     |     | O1- |    |        |        |        |      |
| ATOM       | 508 | HN  | GLU | 38 | 13.318 | 8.720  | 26.817 | 1.00 |
| 84.50      |     |     | H   |    |        |        |        |      |
| ATOM       | 509 | HA  | GLU | 38 | 12.784 | 7.843  | 24.063 | 1.00 |
| 32.15      |     |     | H   |    |        |        |        |      |
| ATOM       | 510 | HB1 | GLU | 38 | 13.025 | 10.198 | 23.252 |      |
| 1.00144.82 |     |     | H   |    |        |        |        |      |
| ATOM       | 511 | HB2 | GLU | 38 | 12.927 | 10.741 | 24.926 |      |
| 1.00106.49 |     |     | H   |    |        |        |        |      |
| ATOM       | 512 | HG1 | GLU | 38 | 10.704 | 9.715  | 25.140 |      |
| 1.00303.31 |     |     | H   |    |        |        |        |      |
| ATOM       | 513 | HG2 | GLU | 38 | 10.804 | 9.121  | 23.484 |      |
| 1.00323.99 |     |     | H   |    |        |        |        |      |
| ATOM       | 514 | N   | CYS | 39 | 15.199 | 8.098  | 23.460 | 1.00 |
| 15.84      |     |     | N   |    |        |        |        |      |
| ATOM       | 515 | CA  | CYS | 39 | 16.635 | 8.060  | 23.214 | 1.00 |
| 14.30      |     |     | C   |    |        |        |        |      |
| ATOM       | 516 | C   | CYS | 39 | 17.170 | 9.488  | 23.071 | 1.00 |
| 22.31      |     |     | C   |    |        |        |        |      |
| ATOM       | 517 | O   | CYS | 39 | 16.441 | 10.379 | 22.636 | 1.00 |
| 32.92      |     |     | O   |    |        |        |        |      |
| ATOM       | 518 | CB  | CYS | 39 | 16.911 | 7.267  | 21.934 | 1.00 |
| 18.08      |     |     | C   |    |        |        |        |      |
| ATOM       | 519 | SG  | CYS | 39 | 15.772 | 7.810  | 20.636 | 1.00 |
| 17.41      |     |     | S   |    |        |        |        |      |
| ATOM       | 520 | HN  | CYS | 39 | 14.589 | 7.733  | 22.789 | 1.00 |
| 24.87      |     |     | H   |    |        |        |        |      |
| ATOM       | 521 | HA  | CYS | 39 | 17.118 | 7.567  | 24.045 | 1.00 |
| 14.60      |     |     | H   |    |        |        |        |      |
| ATOM       | 522 | HB1 | CYS | 39 | 16.768 | 6.215  | 22.124 | 1.00 |
| 27.71      |     |     | H   |    |        |        |        |      |
| ATOM       | 523 | HB2 | CYS | 39 | 17.927 | 7.441  | 21.615 | 1.00 |
| 34.91      |     |     | H   |    |        |        |        |      |
| ATOM       | 524 | N   | PRO | 40 | 18.409 | 9.735  | 23.426 | 1.00 |
| 27.27      |     |     | N   |    |        |        |        |      |
| ATOM       | 525 | CA  | PRO | 40 | 19.003 | 11.100 | 23.325 | 1.00 |
| 47.66      |     |     | C   |    |        |        |        |      |
| ATOM       | 526 | C   | PRO | 40 | 19.290 | 11.494 | 21.879 | 1.00 |
| 71.54      |     |     | C   |    |        |        |        |      |
| ATOM       | 527 | O   | PRO | 40 | 19.910 | 10.741 | 21.126 | 1.00 |
| 87.70      |     |     | O   |    |        |        |        |      |
| ATOM       | 528 | CB  | PRO | 40 | 20.294 | 10.992 | 24.145 | 1.00 |
| 53.85      |     |     | C   |    |        |        |        |      |

|            |     |     |     |    |        |        |        |      |
|------------|-----|-----|-----|----|--------|--------|--------|------|
| ATOM       | 529 | CG  | PRO | 40 | 20.689 | 9.554  | 24.038 | 1.00 |
| 46.04      |     |     | C   |    |        |        |        |      |
| ATOM       | 530 | CD  | PRO | 40 | 19.380 | 8.761  | 23.957 | 1.00 |
| 25.70      |     |     | C   |    |        |        |        |      |
| ATOM       | 531 | HA  | PRO | 40 | 18.346 | 11.825 | 23.781 | 1.00 |
| 58.04      |     |     | H   |    |        |        |        |      |
| ATOM       | 532 | HB1 | PRO | 40 | 20.106 | 11.248 | 25.177 | 1.00 |
| 67.93      |     |     | H   |    |        |        |        |      |
| ATOM       | 533 | HB2 | PRO | 40 | 21.064 | 11.634 | 23.732 | 1.00 |
| 70.99      |     |     | H   |    |        |        |        |      |
| ATOM       | 534 | HG1 | PRO | 40 | 21.247 | 9.250  | 24.911 | 1.00 |
| 65.91      |     |     | H   |    |        |        |        |      |
| ATOM       | 535 | HG2 | PRO | 40 | 21.281 | 9.398  | 23.144 | 1.00 |
| 54.99      |     |     | H   |    |        |        |        |      |
| ATOM       | 536 | HD1 | PRO | 40 | 19.073 | 8.426  | 24.935 | 1.00 |
| 24.22      |     |     | H   |    |        |        |        |      |
| ATOM       | 537 | HD2 | PRO | 40 | 19.485 | 7.925  | 23.281 | 1.00 |
| 26.94      |     |     | H   |    |        |        |        |      |
| ATOM       | 538 | N   | GLY | 41 | 18.838 | 12.680 | 21.508 |      |
| 1.00105.24 |     |     | N   |    |        |        |        |      |
| ATOM       | 539 | CA  | GLY | 41 | 19.046 | 13.186 | 20.156 |      |
| 1.00147.55 |     |     | C   |    |        |        |        |      |
| ATOM       | 540 | C   | GLY | 41 | 20.525 | 13.428 | 19.886 |      |
| 1.00161.74 |     |     | C   |    |        |        |        |      |
| ATOM       | 541 | O   | GLY | 41 | 21.024 | 13.143 | 18.798 |      |
| 1.00244.37 |     |     | O   |    |        |        |        |      |
| ATOM       | 542 | HN  | GLY | 41 | 18.358 | 13.230 | 22.159 |      |
| 1.00121.79 |     |     | H   |    |        |        |        |      |
| ATOM       | 543 | HA1 | GLY | 41 | 18.510 | 14.116 | 20.039 |      |
| 1.00184.40 |     |     | H   |    |        |        |        |      |
| ATOM       | 544 | HA2 | GLY | 41 | 18.669 | 12.467 | 19.448 |      |
| 1.00157.34 |     |     | H   |    |        |        |        |      |
| ATOM       | 545 | N   | LEU | 42 | 21.219 | 13.964 | 20.888 |      |
| 1.00162.48 |     |     | N   |    |        |        |        |      |
| ATOM       | 546 | CA  | LEU | 42 | 22.649 | 14.261 | 20.771 |      |
| 1.00191.48 |     |     | C   |    |        |        |        |      |
| ATOM       | 547 | C   | LEU | 42 | 23.449 | 13.467 | 21.801 |      |
| 1.00166.66 |     |     | C   |    |        |        |        |      |
| ATOM       | 548 | O   | LEU | 42 | 22.956 | 13.164 | 22.886 |      |
| 1.00251.38 |     |     | O   |    |        |        |        |      |
| ATOM       | 549 | CB  | LEU | 42 | 22.887 | 15.758 | 20.994 |      |
| 1.00307.99 |     |     | C   |    |        |        |        |      |
| ATOM       | 550 | CG  | LEU | 42 | 22.048 | 16.576 | 20.005 |      |
| 1.00452.28 |     |     | C   |    |        |        |        |      |
| ATOM       | 551 | CD1 | LEU | 42 | 22.245 | 18.067 | 20.294 |      |
| 1.00681.24 |     |     | C   |    |        |        |        |      |
| ATOM       | 552 | CD2 | LEU | 42 | 22.481 | 16.268 | 18.562 |      |
| 1.00527.46 |     |     | C   |    |        |        |        |      |
| ATOM       | 553 | HN  | LEU | 42 | 20.756 | 14.170 | 21.727 |      |
| 1.00195.47 |     |     | H   |    |        |        |        |      |
| ATOM       | 554 | HA  | LEU | 42 | 23.000 | 13.996 | 19.783 |      |
| 1.00229.77 |     |     | H   |    |        |        |        |      |

|            |     |      |     |    |        |        |        |
|------------|-----|------|-----|----|--------|--------|--------|
| ATOM       | 555 | HB1  | LEU | 42 | 23.933 | 15.981 | 20.844 |
| 1.00342.49 |     |      |     | H  |        |        |        |
| ATOM       | 556 | HB2  | LEU | 42 | 22.606 | 16.017 | 22.005 |
| 1.00335.33 |     |      |     | H  |        |        |        |
| ATOM       | 557 | HG   | LEU | 42 | 21.003 | 16.325 | 20.130 |
| 1.00427.79 |     |      |     | H  |        |        |        |
| ATOM       | 558 | HD11 | LEU | 42 | 21.851 | 18.649 | 19.474 |
| 1.00909.71 |     |      |     | H  |        |        |        |
| ATOM       | 559 | HD12 | LEU | 42 | 23.299 | 18.275 | 20.407 |
| 1.00706.80 |     |      |     | H  |        |        |        |
| ATOM       | 560 | HD13 | LEU | 42 | 21.727 | 18.329 | 21.204 |
| 1.00858.82 |     |      |     | H  |        |        |        |
| ATOM       | 561 | HD21 | LEU | 42 | 22.206 | 17.090 | 17.915 |
| 1.00631.69 |     |      |     | H  |        |        |        |
| ATOM       | 562 | HD22 | LEU | 42 | 21.988 | 15.370 | 18.221 |
| 1.00628.06 |     |      |     | H  |        |        |        |
| ATOM       | 563 | HD23 | LEU | 42 | 23.552 | 16.127 | 18.524 |
| 1.00656.75 |     |      |     | H  |        |        |        |
| ATOM       | 564 | N    | THR | 43 | 24.687 | 13.137 | 21.446 |
| 1.00178.52 |     |      |     | N  |        |        |        |
| ATOM       | 565 | CA   | THR | 43 | 25.557 | 12.380 | 22.338 |
| 1.00240.84 |     |      |     | C  |        |        |        |
| ATOM       | 566 | C    | THR | 43 | 25.957 | 13.245 | 23.540 |
| 1.00372.31 |     |      |     | C  |        |        |        |
| ATOM       | 567 | O    | THR | 43 | 26.035 | 14.468 | 23.419 |
| 1.00500.13 |     |      |     | O  |        |        |        |
| ATOM       | 568 | CB   | THR | 43 | 26.810 | 11.951 | 21.568 |
| 1.00354.13 |     |      |     | C  |        |        |        |
| ATOM       | 569 | CG2  | THR | 43 | 26.398 | 11.191 | 20.308 |
| 1.00463.04 |     |      |     | C  |        |        |        |
| ATOM       | 570 | OG1  | THR | 43 | 27.556 | 13.103 | 21.203 |
| 1.00508.50 |     |      |     | O  |        |        |        |
| ATOM       | 571 | HN   | THR | 43 | 25.022 | 13.409 | 20.566 |
| 1.00229.59 |     |      |     | H  |        |        |        |
| ATOM       | 572 | HA   | THR | 43 | 25.032 | 11.503 | 22.678 |
| 1.00249.90 |     |      |     | H  |        |        |        |
| ATOM       | 573 | HB   | THR | 43 | 27.418 | 11.311 | 22.183 |
| 1.00481.58 |     |      |     | H  |        |        |        |
| ATOM       | 574 | HG1  | THR | 43 | 27.324 | 13.332 | 20.300 |
| 1.00624.31 |     |      |     | H  |        |        |        |
| ATOM       | 575 | HG21 | THR | 43 | 27.280 | 10.863 | 19.780 |
| 1.00650.95 |     |      |     | H  |        |        |        |
| ATOM       | 576 | HG22 | THR | 43 | 25.817 | 11.840 | 19.669 |
| 1.00580.73 |     |      |     | H  |        |        |        |
| ATOM       | 577 | HG23 | THR | 43 | 25.804 | 10.332 | 20.583 |
| 1.00571.99 |     |      |     | H  |        |        |        |
| ATOM       | 578 | N    | PRO | 44 | 26.221 | 12.654 | 24.686 |
| 1.00488.39 |     |      |     | N  |        |        |        |
| ATOM       | 579 | CA   | PRO | 44 | 26.627 | 13.423 | 25.900 |
| 1.00760.13 |     |      |     | C  |        |        |        |
| ATOM       | 580 | C    | PRO | 44 | 28.064 | 13.926 | 25.791 |
| 1.00735.36 |     |      |     | C  |        |        |        |

|            |     |      |     |    |        |        |        |
|------------|-----|------|-----|----|--------|--------|--------|
| ATOM       | 581 | O    | PRO | 44 | 28.537 | 14.681 | 26.641 |
| 1.00999.99 |     |      | O   |    |        |        |        |
| ATOM       | 582 | CB   | PRO | 44 | 26.468 | 12.407 | 27.036 |
| 1.00999.99 |     |      | C   |    |        |        |        |
| ATOM       | 583 | CG   | PRO | 44 | 26.708 | 11.082 | 26.393 |
| 1.00856.94 |     |      | C   |    |        |        |        |
| ATOM       | 584 | CD   | PRO | 44 | 26.167 | 11.201 | 24.963 |
| 1.00548.09 |     |      | C   |    |        |        |        |
| ATOM       | 585 | HA   | PRO | 44 | 25.955 | 14.252 | 26.057 |
| 1.00939.00 |     |      | H   |    |        |        |        |
| ATOM       | 586 | HB1  | PRO | 44 | 25.467 | 12.447 | 27.439 |
| 1.00999.99 |     |      | H   |    |        |        |        |
| ATOM       | 587 | HB2  | PRO | 44 | 27.196 | 12.591 | 27.818 |
| 1.00999.99 |     |      | H   |    |        |        |        |
| ATOM       | 588 | HG1  | PRO | 44 | 26.177 | 10.303 | 26.920 |
| 1.00999.99 |     |      | H   |    |        |        |        |
| ATOM       | 589 | HG2  | PRO | 44 | 27.770 | 10.864 | 26.376 |
| 1.00853.53 |     |      | H   |    |        |        |        |
| ATOM       | 590 | HD1  | PRO | 44 | 25.148 | 10.850 | 24.909 |
| 1.00602.45 |     |      | H   |    |        |        |        |
| ATOM       | 591 | HD2  | PRO | 44 | 26.797 | 10.654 | 24.278 |
| 1.00463.32 |     |      | H   |    |        |        |        |
| ATOM       | 592 | N    | ILE | 45 | 28.753 | 13.496 | 24.738 |
| 1.00518.33 |     |      | N   |    |        |        |        |
| ATOM       | 593 | CA   | ILE | 45 | 30.135 | 13.902 | 24.524 |
| 1.00582.79 |     |      | C   |    |        |        |        |
| ATOM       | 594 | C    | ILE | 45 | 30.230 | 15.420 | 24.391 |
| 1.00795.93 |     |      | C   |    |        |        |        |
| ATOM       | 595 | O    | ILE | 45 | 29.509 | 16.030 | 23.602 |
| 1.00898.75 |     |      | O   |    |        |        |        |
| ATOM       | 596 | CB   | ILE | 45 | 30.681 | 13.250 | 23.250 |
| 1.00474.41 |     |      | C   |    |        |        |        |
| ATOM       | 597 | CG1  | ILE | 45 | 30.499 | 11.724 | 23.322 |
| 1.00516.90 |     |      | C   |    |        |        |        |
| ATOM       | 598 | CG2  | ILE | 45 | 32.164 | 13.591 | 23.086 |
| 1.00760.75 |     |      | C   |    |        |        |        |
| ATOM       | 599 | CD1  | ILE | 45 | 31.163 | 11.152 | 24.582 |
| 1.00566.81 |     |      | C   |    |        |        |        |
| ATOM       | 600 | HN   | ILE | 45 | 28.324 | 12.893 | 24.096 |
| 1.00395.72 |     |      | H   |    |        |        |        |
| ATOM       | 601 | HA   | ILE | 45 | 30.730 | 13.585 | 25.365 |
| 1.00711.06 |     |      | H   |    |        |        |        |
| ATOM       | 602 | HB   | ILE | 45 | 30.136 | 13.633 | 22.399 |
| 1.00477.81 |     |      | H   |    |        |        |        |
| ATOM       | 603 | HG11 | ILE | 45 | 30.947 | 11.272 | 22.448 |
| 1.00624.28 |     |      | H   |    |        |        |        |
| ATOM       | 604 | HG12 | ILE | 45 | 29.445 | 11.493 | 23.341 |
| 1.00744.84 |     |      | H   |    |        |        |        |
| ATOM       | 605 | HG21 | ILE | 45 | 32.669 | 13.466 | 24.032 |
| 1.00920.57 |     |      | H   |    |        |        |        |
| ATOM       | 606 | HG22 | ILE | 45 | 32.263 | 14.616 | 22.758 |
| 1.00999.99 |     |      | H   |    |        |        |        |



|            |     |      |     |    |        |        |        |
|------------|-----|------|-----|----|--------|--------|--------|
| ATOM       | 607 | HG23 | ILE | 45 | 32.606 | 12.934 | 22.351 |
| 1.00865.46 |     |      |     | H  |        |        |        |
| ATOM       | 608 | HD11 | ILE | 45 | 30.490 | 11.259 | 25.421 |
| 1.00658.89 |     |      |     | H  |        |        |        |
| ATOM       | 609 | HD12 | ILE | 45 | 32.081 | 11.680 | 24.788 |
| 1.00734.30 |     |      |     | H  |        |        |        |
| ATOM       | 610 | HD13 | ILE | 45 | 31.378 | 10.106 | 24.429 |
| 1.00675.84 |     |      |     | H  |        |        |        |
| ATOM       | 611 | N    | ALA | 46 | 31.125 | 16.021 | 25.167 |
| 1.00999.99 |     |      |     | N  |        |        |        |
| ATOM       | 612 | CA   | ALA | 46 | 31.307 | 17.467 | 25.129 |
| 1.00999.99 |     |      |     | C  |        |        |        |
| ATOM       | 613 | C    | ALA | 46 | 32.053 | 17.880 | 23.864 |
| 1.00999.99 |     |      |     | C  |        |        |        |
| ATOM       | 614 | CB   | ALA | 46 | 32.090 | 17.926 | 26.359 |
| 1.00999.99 |     |      |     | C  |        |        |        |
| ATOM       | 615 | OT1  | ALA | 46 | 31.833 | 17.255 | 22.840 |
| 1.00999.99 |     |      |     | O  |        |        |        |
| ATOM       | 616 | OT2  | ALA | 46 | 32.831 | 18.816 | 23.940 |
| 1.00999.99 |     |      |     | O  |        |        |        |
| ATOM       | 617 | HN   | ALA | 46 | 31.673 | 15.483 | 25.776 |
| 1.00999.99 |     |      |     | H  |        |        |        |
| ATOM       | 618 | HA   | ALA | 46 | 30.338 | 17.942 | 25.136 |
| 1.00999.99 |     |      |     | H  |        |        |        |
| ATOM       | 619 | HB1  | ALA | 46 | 31.579 | 17.599 | 27.253 |
| 1.00999.99 |     |      |     | H  |        |        |        |
| ATOM       | 620 | HB2  | ALA | 46 | 32.163 | 19.003 | 26.359 |
| 1.00999.99 |     |      |     | H  |        |        |        |
| ATOM       | 621 | HB3  | ALA | 46 | 33.082 | 17.498 | 26.336 |
| 1.00999.99 |     |      |     | H  |        |        |        |
| ENDMDL     |     |      |     |    |        |        |        |
| TER        |     |      |     |    |        |        |        |
| MODEL      | 8   |      |     |    |        |        |        |
| ATOM       | 1   | N    | GLY | 1  | 26.106 | -2.123 | 20.562 |
| 1.00999.99 |     |      |     | N  |        |        |        |
| ATOM       | 2   | CA   | GLY | 1  | 25.055 | -2.779 | 19.732 |
| 1.00999.99 |     |      |     | C  |        |        |        |
| ATOM       | 3   | C    | GLY | 1  | 24.440 | -1.755 | 18.786 |
| 1.00999.99 |     |      |     | C  |        |        |        |
| ATOM       | 4   | O    | GLY | 1  | 23.801 | -0.797 | 19.222 |
| 1.00999.99 |     |      |     | O  |        |        |        |
| ATOM       | 5   | HA1  | GLY | 1  | 24.286 | -3.179 | 20.375 |
| 1.00999.99 |     |      |     | H  |        |        |        |
| ATOM       | 6   | HA2  | GLY | 1  | 25.498 | -3.580 | 19.157 |
| 1.00999.99 |     |      |     | H  |        |        |        |
| ATOM       | 7   | HT1  | GLY | 1  | 26.529 | -1.338 | 20.029 |
| 1.00999.99 |     |      |     | H  |        |        |        |
| ATOM       | 8   | HT2  | GLY | 1  | 26.844 | -2.819 | 20.800 |
| 1.00999.99 |     |      |     | H  |        |        |        |
| ATOM       | 9   | HT3  | GLY | 1  | 25.679 | -1.757 | 21.435 |
| 1.00999.99 |     |      |     | H  |        |        |        |
| ATOM       | 10  | N    | LEU | 2  | 24.636 | -1.963 | 17.488 |

|            |    |      |     |   |        |        |        |      |  |
|------------|----|------|-----|---|--------|--------|--------|------|--|
| 1.00999.99 |    |      |     | N |        |        |        |      |  |
| ATOM       | 11 | CA   | LEU | 2 | 24.094 | -1.049 | 16.489 |      |  |
| 1.00895.59 |    |      |     | C |        |        |        |      |  |
| ATOM       | 12 | C    | LEU | 2 | 22.574 | -1.161 | 16.441 |      |  |
| 1.00532.27 |    |      |     | C |        |        |        |      |  |
| ATOM       | 13 | O    | LEU | 2 | 22.014 | -2.230 | 16.681 |      |  |
| 1.00625.21 |    |      |     | O |        |        |        |      |  |
| ATOM       | 14 | CB   | LEU | 2 | 24.675 | -1.379 | 15.111 |      |  |
| 1.00999.99 |    |      |     | C |        |        |        |      |  |
| ATOM       | 15 | CG   | LEU | 2 | 26.207 | -1.296 | 15.154 |      |  |
| 1.00999.99 |    |      |     | C |        |        |        |      |  |
| ATOM       | 16 | CD1  | LEU | 2 | 26.770 | -1.710 | 13.791 |      |  |
| 1.00999.99 |    |      |     | C |        |        |        |      |  |
| ATOM       | 17 | CD2  | LEU | 2 | 26.650 | 0.143  | 15.481 |      |  |
| 1.00999.99 |    |      |     | C |        |        |        |      |  |
| ATOM       | 18 | HN   | LEU | 2 | 25.152 | -2.743 | 17.198 |      |  |
| 1.00999.99 |    |      |     | H |        |        |        |      |  |
| ATOM       | 19 | HA   | LEU | 2 | 24.360 | -0.039 | 16.752 |      |  |
| 1.00890.87 |    |      |     | H |        |        |        |      |  |
| ATOM       | 20 | HB1  | LEU | 2 | 24.299 | -0.673 | 14.386 |      |  |
| 1.00924.07 |    |      |     | H |        |        |        |      |  |
| ATOM       | 21 | HB2  | LEU | 2 | 24.378 | -2.379 | 14.827 |      |  |
| 1.00999.99 |    |      |     | H |        |        |        |      |  |
| ATOM       | 22 | HG   | LEU | 2 | 26.579 | -1.968 | 15.913 |      |  |
| 1.00999.99 |    |      |     | H |        |        |        |      |  |
| ATOM       | 23 | HD11 | LEU | 2 | 27.845 | -1.799 | 13.857 |      |  |
| 1.00999.99 |    |      |     | H |        |        |        |      |  |
| ATOM       | 24 | HD12 | LEU | 2 | 26.516 | -0.964 | 13.053 |      |  |
| 1.00999.99 |    |      |     | H |        |        |        |      |  |
| ATOM       | 25 | HD13 | LEU | 2 | 26.347 | -2.661 | 13.501 |      |  |
| 1.00999.99 |    |      |     | H |        |        |        |      |  |
| ATOM       | 26 | HD21 | LEU | 2 | 26.639 | 0.287  | 16.551 |      |  |
| 1.00999.99 |    |      |     | H |        |        |        |      |  |
| ATOM       | 27 | HD22 | LEU | 2 | 25.975 | 0.848  | 15.015 |      |  |
| 1.00999.99 |    |      |     | H |        |        |        |      |  |
| ATOM       | 28 | HD23 | LEU | 2 | 27.651 | 0.309  | 15.110 |      |  |
| 1.00999.99 |    |      |     | H |        |        |        |      |  |
| ATOM       | 29 | N    | CYS | 3 | 21.911 | -0.050 | 16.135 |      |  |
| 1.00271.28 |    |      |     | N |        |        |        |      |  |
| ATOM       | 30 | CA   | CYS | 3 | 20.453 | -0.036 | 16.066 |      |  |
| 1.00104.50 |    |      |     | C |        |        |        |      |  |
| ATOM       | 31 | C    | CYS | 3 | 19.974 | -0.574 | 14.721 | 1.00 |  |
| 90.98      |    |      | C   |   |        |        |        |      |  |
| ATOM       | 32 | O    | CYS | 3 | 20.199 | 0.042  | 13.679 |      |  |
| 1.00207.28 |    |      |     | O |        |        |        |      |  |
| ATOM       | 33 | CB   | CYS | 3 | 19.932 | 1.391  | 16.250 | 1.00 |  |
| 37.83      |    |      | C   |   |        |        |        |      |  |
| ATOM       | 34 | SG   | CYS | 3 | 20.461 | 2.028  | 17.860 | 1.00 |  |
| 81.56      |    |      | S   |   |        |        |        |      |  |
| ATOM       | 35 | HN   | CYS | 3 | 22.409 | 0.777  | 15.957 |      |  |
| 1.00296.55 |    |      |     | H |        |        |        |      |  |
| ATOM       | 36 | HA   | CYS | 3 | 20.056 | -0.657 | 16.855 |      |  |

|            |    |     |     |   |        |        |        |      |  |     |
|------------|----|-----|-----|---|--------|--------|--------|------|--|-----|
| 1.00166.45 |    |     |     |   |        |        |        |      |  | H   |
| ATOM       | 37 | HB1 | CYS | 3 | 18.854 | 1.388  | 16.201 | 1.00 |  |     |
| 40.38      |    |     | H   |   |        |        |        |      |  |     |
| ATOM       | 38 | HB2 | CYS | 3 | 20.326 | 2.022  | 15.468 | 1.00 |  |     |
| 98.45      |    |     | H   |   |        |        |        |      |  |     |
| ATOM       | 39 | N   | SER | 4 | 19.302 | -1.720 | 14.754 | 1.00 |  |     |
| 85.31      |    |     | N   |   |        |        |        |      |  |     |
| ATOM       | 40 | CA  | SER | 4 | 18.784 | -2.326 | 13.532 | 1.00 |  |     |
| 92.94      |    |     | C   |   |        |        |        |      |  |     |
| ATOM       | 41 | C   | SER | 4 | 17.772 | -1.396 | 12.890 | 1.00 |  |     |
| 67.37      |    |     | C   |   |        |        |        |      |  |     |
| ATOM       | 42 | O   | SER | 4 | 17.745 | -1.218 | 11.673 |      |  |     |
| 1.00102.28 |    |     |     |   |        |        |        |      |  | O   |
| ATOM       | 43 | CB  | SER | 4 | 18.084 | -3.642 | 13.855 |      |  |     |
| 1.00123.83 |    |     |     |   |        |        |        |      |  | C   |
| ATOM       | 44 | OG  | SER | 4 | 17.707 | -4.281 | 12.642 |      |  |     |
| 1.00178.89 |    |     |     |   |        |        |        |      |  | O   |
| ATOM       | 45 | HN  | SER | 4 | 19.145 | -2.162 | 15.614 |      |  |     |
| 1.00163.03 |    |     |     |   |        |        |        |      |  | H   |
| ATOM       | 46 | HA  | SER | 4 | 19.596 | -2.509 | 12.845 |      |  |     |
| 1.00129.78 |    |     |     |   |        |        |        |      |  | H   |
| ATOM       | 47 | HB1 | SER | 4 | 17.199 | -3.432 | 14.448 |      |  |     |
| 1.00105.26 |    |     |     |   |        |        |        |      |  | H   |
| ATOM       | 48 | HB2 | SER | 4 | 18.746 | -4.285 | 14.411 |      |  |     |
| 1.00156.87 |    |     |     |   |        |        |        |      |  | H   |
| ATOM       | 49 | HG  | SER | 4 | 16.885 | -3.887 | 12.341 |      |  |     |
| 1.00218.16 |    |     |     |   |        |        |        |      |  | H   |
| ATOM       | 50 | N   | GLU | 5 | 16.923 | -0.824 | 13.737 | 1.00 |  |     |
| 41.67      |    |     | N   |   |        |        |        |      |  |     |
| ATOM       | 51 | CA  | GLU | 5 | 15.871 | 0.078  | 13.290 | 1.00 |  |     |
| 41.21      |    |     | C   |   |        |        |        |      |  |     |
| ATOM       | 52 | C   | GLU | 5 | 15.693 | 1.218  | 14.287 | 1.00 |  |     |
| 41.92      |    |     | C   |   |        |        |        |      |  |     |
| ATOM       | 53 | O   | GLU | 5 | 16.563 | 1.460  | 15.125 | 1.00 |  |     |
| 74.72      |    |     | O   |   |        |        |        |      |  |     |
| ATOM       | 54 | CB  | GLU | 5 | 14.568 | -0.702 | 13.150 | 1.00 |  |     |
| 49.24      |    |     | C   |   |        |        |        |      |  |     |
| ATOM       | 55 | CG  | GLU | 5 | 14.237 | -1.365 | 14.481 | 1.00 |  |     |
| 55.48      |    |     | C   |   |        |        |        |      |  |     |
| ATOM       | 56 | CD  | GLU | 5 | 13.081 | -2.345 | 14.307 | 1.00 |  |     |
| 92.06      |    |     | C   |   |        |        |        |      |  |     |
| ATOM       | 57 | OE1 | GLU | 5 | 12.705 | -2.967 | 15.286 |      |  |     |
| 1.00206.49 |    |     |     |   |        |        |        |      |  | O   |
| ATOM       | 58 | OE2 | GLU | 5 | 12.590 | -2.460 | 13.194 |      |  |     |
| 1.00197.24 |    |     |     |   |        |        |        |      |  | O1- |
| ATOM       | 59 | HN  | GLU | 5 | 16.997 | -1.028 | 14.691 | 1.00 |  |     |
| 45.52      |    |     | H   |   |        |        |        |      |  |     |
| ATOM       | 60 | HA  | GLU | 5 | 16.133 | 0.487  | 12.334 | 1.00 |  |     |
| 60.63      |    |     | H   |   |        |        |        |      |  |     |
| ATOM       | 61 | HB1 | GLU | 5 | 14.679 | -1.461 | 12.390 | 1.00 |  |     |
| 61.59      |    |     | H   |   |        |        |        |      |  |     |
| ATOM       | 62 | HB2 | GLU | 5 | 13.774 | -0.031 | 12.876 | 1.00 |  |     |

|            |    |      |     |   |        |        |        |      |  |
|------------|----|------|-----|---|--------|--------|--------|------|--|
| 63.66      |    |      | H   |   |        |        |        |      |  |
| ATOM       | 63 | HG1  | GLU | 5 | 13.959 | -0.609 | 15.199 | 1.00 |  |
| 58.03      |    |      | H   |   |        |        |        |      |  |
| ATOM       | 64 | HG2  | GLU | 5 | 15.107 | -1.890 | 14.832 | 1.00 |  |
| 57.77      |    |      | H   |   |        |        |        |      |  |
| ATOM       | 65 | N    | ASN | 6 | 14.568 | 1.917  | 14.197 | 1.00 |  |
| 50.73      |    |      | N   |   |        |        |        |      |  |
| ATOM       | 66 | CA   | ASN | 6 | 14.303 | 3.029  | 15.102 | 1.00 |  |
| 71.04      |    |      | C   |   |        |        |        |      |  |
| ATOM       | 67 | C    | ASN | 6 | 14.282 | 2.544  | 16.548 | 1.00 |  |
| 65.17      |    |      | C   |   |        |        |        |      |  |
| ATOM       | 68 | O    | ASN | 6 | 14.785 | 3.218  | 17.447 | 1.00 |  |
| 94.86      |    |      | O   |   |        |        |        |      |  |
| ATOM       | 69 | CB   | ASN | 6 | 12.961 | 3.675  | 14.759 | 1.00 |  |
| 94.83      |    |      | C   |   |        |        |        |      |  |
| ATOM       | 70 | CG   | ASN | 6 | 13.072 | 4.444  | 13.446 |      |  |
| 1.00160.94 |    |      | C   |   |        |        |        |      |  |
| ATOM       | 71 | ND2  | ASN | 6 | 11.990 | 4.730  | 12.774 |      |  |
| 1.00244.88 |    |      | N   |   |        |        |        |      |  |
| ATOM       | 72 | OD1  | ASN | 6 | 14.175 | 4.794  | 13.024 |      |  |
| 1.00219.73 |    |      | O   |   |        |        |        |      |  |
| ATOM       | 73 | HN   | ASN | 6 | 13.909 | 1.684  | 13.510 | 1.00 |  |
| 72.81      |    |      | H   |   |        |        |        |      |  |
| ATOM       | 74 | HA   | ASN | 6 | 15.085 | 3.766  | 14.991 | 1.00 |  |
| 96.02      |    |      | H   |   |        |        |        |      |  |
| ATOM       | 75 | HB1  | ASN | 6 | 12.678 | 4.357  | 15.548 |      |  |
| 1.00111.09 |    |      | H   |   |        |        |        |      |  |
| ATOM       | 76 | HB2  | ASN | 6 | 12.207 | 2.907  | 14.662 | 1.00 |  |
| 98.13      |    |      | H   |   |        |        |        |      |  |
| ATOM       | 77 | HD21 | ASN | 6 | 11.115 | 4.451  | 13.112 |      |  |
| 1.00272.43 |    |      | H   |   |        |        |        |      |  |
| ATOM       | 78 | HD22 | ASN | 6 | 12.055 | 5.223  | 11.930 |      |  |
| 1.00336.78 |    |      | H   |   |        |        |        |      |  |
| ATOM       | 79 | N    | GLY | 7 | 13.699 | 1.365  | 16.763 | 1.00 |  |
| 51.80      |    |      | N   |   |        |        |        |      |  |
| ATOM       | 80 | CA   | GLY | 7 | 13.614 | 0.779  | 18.105 | 1.00 |  |
| 71.47      |    |      | C   |   |        |        |        |      |  |
| ATOM       | 81 | C    | GLY | 7 | 14.209 | -0.622 | 18.121 | 1.00 |  |
| 41.04      |    |      | C   |   |        |        |        |      |  |
| ATOM       | 82 | O    | GLY | 7 | 13.501 | -1.607 | 18.333 | 1.00 |  |
| 44.54      |    |      | O   |   |        |        |        |      |  |
| ATOM       | 83 | HN   | GLY | 7 | 13.319 | 0.875  | 16.005 | 1.00 |  |
| 45.49      |    |      | H   |   |        |        |        |      |  |
| ATOM       | 84 | HA1  | GLY | 7 | 12.581 | 0.722  | 18.400 |      |  |
| 1.00103.52 |    |      | H   |   |        |        |        |      |  |
| ATOM       | 85 | HA2  | GLY | 7 | 14.150 | 1.399  | 18.812 |      |  |
| 1.00108.67 |    |      | H   |   |        |        |        |      |  |
| ATOM       | 86 | N    | ASP | 8 | 15.511 | -0.700 | 17.895 | 1.00 |  |
| 27.00      |    |      | N   |   |        |        |        |      |  |
| ATOM       | 87 | CA   | ASP | 8 | 16.201 | -1.986 | 17.883 | 1.00 |  |
| 14.15      |    |      | C   |   |        |        |        |      |  |
| ATOM       | 88 | C    | ASP | 8 | 16.082 | -2.671 | 19.239 | 1.00 |  |

|            |     |     |     |    |        |        |        |      |     |
|------------|-----|-----|-----|----|--------|--------|--------|------|-----|
| 9.37       |     |     | C   |    |        |        |        |      |     |
| ATOM       | 89  | O   | ASP | 8  | 15.853 | -3.878 | 19.319 | 1.00 |     |
| 14.61      |     |     | O   |    |        |        |        |      |     |
| ATOM       | 90  | CB  | ASP | 8  | 17.675 | -1.794 | 17.532 | 1.00 |     |
| 15.06      |     |     | C   |    |        |        |        |      |     |
| ATOM       | 91  | CG  | ASP | 8  | 18.359 | -3.150 | 17.391 | 1.00 |     |
| 21.22      |     |     | C   |    |        |        |        |      |     |
| ATOM       | 92  | OD1 | ASP | 8  | 17.733 | -4.144 | 17.719 |      |     |
| 1.00119.56 |     |     |     |    |        |        |        |      | O   |
| ATOM       | 93  | OD2 | ASP | 8  | 19.500 | -3.174 | 16.959 |      |     |
| 1.00133.27 |     |     |     |    |        |        |        |      | O1- |
| ATOM       | 94  | HN  | ASP | 8  | 16.017 | 0.121  | 17.733 | 1.00 |     |
| 35.63      |     |     | H   |    |        |        |        |      |     |
| ATOM       | 95  | HA  | ASP | 8  | 15.745 | -2.616 | 17.137 | 1.00 |     |
| 20.92      |     |     | H   |    |        |        |        |      |     |
| ATOM       | 96  | HB1 | ASP | 8  | 18.158 | -1.232 | 18.316 | 1.00 |     |
| 29.39      |     |     | H   |    |        |        |        |      |     |
| ATOM       | 97  | HB2 | ASP | 8  | 17.756 | -1.252 | 16.601 | 1.00 |     |
| 44.14      |     |     | H   |    |        |        |        |      |     |
| ATOM       | 98  | N   | CYS | 9  | 16.235 | -1.893 | 20.303 | 1.00 |     |
| 5.93       |     |     | N   |    |        |        |        |      |     |
| ATOM       | 99  | CA  | CYS | 9  | 16.136 | -2.438 | 21.651 | 1.00 |     |
| 7.54       |     |     | C   |    |        |        |        |      |     |
| ATOM       | 100 | C   | CYS | 9  | 14.748 | -3.024 | 21.873 | 1.00 |     |
| 14.60      |     |     | C   |    |        |        |        |      |     |
| ATOM       | 101 | O   | CYS | 9  | 14.595 | -4.107 | 22.440 | 1.00 |     |
| 25.78      |     |     | O   |    |        |        |        |      |     |
| ATOM       | 102 | CB  | CYS | 9  | 16.399 | -1.346 | 22.677 | 1.00 |     |
| 6.63       |     |     | C   |    |        |        |        |      |     |
| ATOM       | 103 | SG  | CYS | 9  | 18.144 | -0.903 | 22.610 | 1.00 |     |
| 10.91      |     |     | S   |    |        |        |        |      |     |
| ATOM       | 104 | HN  | CYS | 9  | 16.411 | -0.937 | 20.177 | 1.00 |     |
| 6.51       |     |     | H   |    |        |        |        |      |     |
| ATOM       | 105 | HA  | CYS | 9  | 16.881 | -3.206 | 21.773 | 1.00 |     |
| 11.12      |     |     | H   |    |        |        |        |      |     |
| ATOM       | 106 | HB1 | CYS | 9  | 16.161 | -1.712 | 23.664 | 1.00 |     |
| 11.28      |     |     | H   |    |        |        |        |      |     |
| ATOM       | 107 | HB2 | CYS | 9  | 15.794 | -0.481 | 22.453 | 1.00 |     |
| 5.04       |     |     | H   |    |        |        |        |      |     |
| ATOM       | 108 | N   | ALA | 10 | 13.742 | -2.295 | 21.405 | 1.00 |     |
| 16.26      |     |     | N   |    |        |        |        |      |     |
| ATOM       | 109 | CA  | ALA | 10 | 12.355 | -2.725 | 21.525 | 1.00 |     |
| 32.04      |     |     | C   |    |        |        |        |      |     |
| ATOM       | 110 | C   | ALA | 10 | 11.467 | -1.861 | 20.629 | 1.00 |     |
| 45.47      |     |     | C   |    |        |        |        |      |     |
| ATOM       | 111 | O   | ALA | 10 | 11.885 | -0.798 | 20.173 |      |     |
| 1.00119.04 |     |     |     |    |        |        |        |      | O   |
| ATOM       | 112 | CB  | ALA | 10 | 11.889 | -2.635 | 22.989 | 1.00 |     |
| 30.10      |     |     | C   |    |        |        |        |      |     |
| ATOM       | 113 | HN  | ALA | 10 | 13.941 | -1.447 | 20.956 | 1.00 |     |
| 12.81      |     |     | H   |    |        |        |        |      |     |
| ATOM       | 114 | HA  | ALA | 10 | 12.282 | -3.753 | 21.197 | 1.00 |     |

|            |     |     |     |     |        |        |        |      |
|------------|-----|-----|-----|-----|--------|--------|--------|------|
| 47.14      |     |     | H   |     |        |        |        |      |
| ATOM       | 115 | HB1 | ALA | 10  | 12.728 | -2.823 | 23.642 | 1.00 |
| 84.37      |     |     | H   |     |        |        |        |      |
| ATOM       | 116 | HB2 | ALA | 10  | 11.121 | -3.373 | 23.170 |      |
| 1.00118.20 |     |     |     | H   |        |        |        |      |
| ATOM       | 117 | HB3 | ALA | 10  | 11.492 | -1.651 | 23.189 |      |
| 1.00117.32 |     |     |     | H   |        |        |        |      |
| ATOM       | 118 | N   | ALA | 11  | 10.250 | -2.325 | 20.374 | 1.00 |
| 30.62      |     |     | N   |     |        |        |        |      |
| ATOM       | 119 | CA  | ALA | 11  | 9.326  | -1.584 | 19.522 | 1.00 |
| 35.24      |     |     | C   |     |        |        |        |      |
| ATOM       | 120 | C   | ALA | 11  | 9.016  | -0.207 | 20.111 | 1.00 |
| 22.78      |     |     | C   |     |        |        |        |      |
| ATOM       | 121 | O   | ALA | 11  | 8.939  | 0.783  | 19.383 | 1.00 |
| 53.33      |     |     | O   |     |        |        |        |      |
| ATOM       | 122 | CB  | ALA | 11  | 8.027  | -2.372 | 19.356 | 1.00 |
| 60.49      |     |     | C   |     |        |        |        |      |
| ATOM       | 123 | HN  | ALA | 11  | 9.969  | -3.181 | 20.759 | 1.00 |
| 50.37      |     |     | H   |     |        |        |        |      |
| ATOM       | 124 | HA  | ALA | 11  | 9.778  | -1.453 | 18.550 | 1.00 |
| 41.70      |     |     | H   |     |        |        |        |      |
| ATOM       | 125 | HB1 | ALA | 11  | 7.316  | -1.782 | 18.796 |      |
| 1.00157.06 |     |     |     | H   |        |        |        |      |
| ATOM       | 126 | HB2 | ALA | 11  | 7.616  | -2.600 | 20.329 |      |
| 1.00148.83 |     |     |     | H   |        |        |        |      |
| ATOM       | 127 | HB3 | ALA | 11  | 8.228  | -3.290 | 18.827 |      |
| 1.00137.06 |     |     |     | H   |        |        |        |      |
| ATOM       | 128 | N   | ASP | 12  | 8.828  | -0.152 | 21.427 | 1.00 |
| 18.98      |     |     | N   |     |        |        |        |      |
| ATOM       | 129 | CA  | ASP | 12  | 8.514  | 1.111  | 22.097 | 1.00 |
| 31.05      |     |     | C   |     |        |        |        |      |
| ATOM       | 130 | C   | ASP | 12  | 9.783  | 1.880  | 22.461 | 1.00 |
| 22.98      |     |     | C   |     |        |        |        |      |
| ATOM       | 131 | O   | ASP | 12  | 9.775  | 3.110  | 22.523 | 1.00 |
| 37.14      |     |     | O   |     |        |        |        |      |
| ATOM       | 132 | CB  | ASP | 12  | 7.709  | 0.833  | 23.369 | 1.00 |
| 48.35      |     |     | C   |     |        |        |        |      |
| ATOM       | 133 | CG  | ASP | 12  | 6.329  | 0.299  | 23.004 |      |
| 1.00104.83 |     |     |     | C   |        |        |        |      |
| ATOM       | 134 | OD1 | ASP | 12  | 5.678  | -0.252 | 23.878 |      |
| 1.00258.73 |     |     |     | O   |        |        |        |      |
| ATOM       | 135 | OD2 | ASP | 12  | 5.942  | 0.449  | 21.857 |      |
| 1.00213.46 |     |     |     | O1- |        |        |        |      |
| ATOM       | 136 | HN  | ASP | 12  | 8.893  | -0.975 | 21.957 | 1.00 |
| 36.19      |     |     | H   |     |        |        |        |      |
| ATOM       | 137 | HA  | ASP | 12  | 7.913  | 1.719  | 21.438 | 1.00 |
| 49.76      |     |     | H   |     |        |        |        |      |
| ATOM       | 138 | HB1 | ASP | 12  | 7.602  | 1.746  | 23.933 | 1.00 |
| 95.71      |     |     | H   |     |        |        |        |      |
| ATOM       | 139 | HB2 | ASP | 12  | 8.229  | 0.100  | 23.970 | 1.00 |
| 54.37      |     |     | H   |     |        |        |        |      |
| ATOM       | 140 | N   | GLU | 13  | 10.866 | 1.155  | 22.709 | 1.00 |

|            |     |     |     |    |        |        |        |      |
|------------|-----|-----|-----|----|--------|--------|--------|------|
| 17.60      |     |     | N   |    |        |        |        |      |
| ATOM       | 141 | CA  | GLU | 13 | 12.131 | 1.784  | 23.077 | 1.00 |
| 12.01      |     |     | C   |    |        |        |        |      |
| ATOM       | 142 | C   | GLU | 13 | 12.790 | 2.440  | 21.865 | 1.00 |
| 10.07      |     |     | C   |    |        |        |        |      |
| ATOM       | 143 | O   | GLU | 13 | 12.484 | 2.100  | 20.722 | 1.00 |
| 12.81      |     |     | O   |    |        |        |        |      |
| ATOM       | 144 | CB  | GLU | 13 | 13.068 | 0.741  | 23.680 | 1.00 |
| 11.74      |     |     | C   |    |        |        |        |      |
| ATOM       | 145 | CG  | GLU | 13 | 12.469 | 0.236  | 24.996 | 1.00 |
| 13.49      |     |     | C   |    |        |        |        |      |
| ATOM       | 146 | CD  | GLU | 13 | 13.201 | -1.017 | 25.464 |      |
| 1.00142.36 |     |     | C   |    |        |        |        |      |
| ATOM       | 147 | OE1 | GLU | 13 | 12.770 | -1.598 | 26.446 |      |
| 1.00339.06 |     |     | O   |    |        |        |        |      |
| ATOM       | 148 | OE2 | GLU | 13 | 14.179 | -1.377 | 24.835 |      |
| 1.00335.28 |     |     | O1- |    |        |        |        |      |
| ATOM       | 149 | HN  | GLU | 13 | 10.814 | 0.178  | 22.651 | 1.00 |
| 28.36      |     |     | H   |    |        |        |        |      |
| ATOM       | 150 | HA  | GLU | 13 | 11.939 | 2.544  | 23.820 | 1.00 |
| 13.06      |     |     | H   |    |        |        |        |      |
| ATOM       | 151 | HB1 | GLU | 13 | 14.031 | 1.188  | 23.874 | 1.00 |
| 13.76      |     |     | H   |    |        |        |        |      |
| ATOM       | 152 | HB2 | GLU | 13 | 13.187 | -0.082 | 22.991 | 1.00 |
| 9.94       |     |     | H   |    |        |        |        |      |
| ATOM       | 153 | HG1 | GLU | 13 | 11.424 | 0.003  | 24.848 | 1.00 |
| 66.02      |     |     | H   |    |        |        |        |      |
| ATOM       | 154 | HG2 | GLU | 13 | 12.561 | 1.005  | 25.749 | 1.00 |
| 56.23      |     |     | H   |    |        |        |        |      |
| ATOM       | 155 | N   | CYS | 14 | 13.691 | 3.387  | 22.127 | 1.00 |
| 9.12       |     |     | N   |    |        |        |        |      |
| ATOM       | 156 | CA  | CYS | 14 | 14.395 | 4.100  | 21.057 | 1.00 |
| 10.69      |     |     | C   |    |        |        |        |      |
| ATOM       | 157 | C   | CYS | 14 | 15.810 | 3.563  | 20.908 | 1.00 |
| 9.56       |     |     | C   |    |        |        |        |      |
| ATOM       | 158 | O   | CYS | 14 | 16.411 | 3.112  | 21.879 | 1.00 |
| 13.62      |     |     | O   |    |        |        |        |      |
| ATOM       | 159 | CB  | CYS | 14 | 14.461 | 5.593  | 21.381 | 1.00 |
| 13.96      |     |     | C   |    |        |        |        |      |
| ATOM       | 160 | SG  | CYS | 14 | 15.308 | 6.465  | 20.036 | 1.00 |
| 42.96      |     |     | S   |    |        |        |        |      |
| ATOM       | 161 | HN  | CYS | 14 | 13.893 | 3.613  | 23.060 | 1.00 |
| 9.76       |     |     | H   |    |        |        |        |      |
| ATOM       | 162 | HA  | CYS | 14 | 13.867 | 3.968  | 20.123 | 1.00 |
| 15.54      |     |     | H   |    |        |        |        |      |
| ATOM       | 163 | HB1 | CYS | 14 | 15.008 | 5.734  | 22.301 | 1.00 |
| 50.72      |     |     | H   |    |        |        |        |      |
| ATOM       | 164 | HB2 | CYS | 14 | 13.460 | 5.983  | 21.491 | 1.00 |
| 46.13      |     |     | H   |    |        |        |        |      |
| ATOM       | 165 | N   | CYS | 15 | 16.339 | 3.627  | 19.691 | 1.00 |
| 9.60       |     |     | N   |    |        |        |        |      |
| ATOM       | 166 | CA  | CYS | 15 | 17.694 | 3.158  | 19.427 | 1.00 |

|            |     |      |     |    |        |       |        |      |  |
|------------|-----|------|-----|----|--------|-------|--------|------|--|
| 9.28       |     |      | C   |    |        |       |        |      |  |
| ATOM       | 167 | C    | CYS | 15 | 18.292 | 3.976 | 18.296 | 1.00 |  |
| 9.92       |     |      | C   |    |        |       |        |      |  |
| ATOM       | 168 | O    | CYS | 15 | 17.712 | 4.072 | 17.215 | 1.00 |  |
| 13.31      |     |      | O   |    |        |       |        |      |  |
| ATOM       | 169 | CB   | CYS | 15 | 17.681 | 1.674 | 19.043 | 1.00 |  |
| 12.90      |     |      | C   |    |        |       |        |      |  |
| ATOM       | 170 | SG   | CYS | 15 | 19.354 | 0.995 | 19.197 | 1.00 |  |
| 39.11      |     |      | S   |    |        |       |        |      |  |
| ATOM       | 171 | HN   | CYS | 15 | 15.815 | 4.010 | 18.957 | 1.00 |  |
| 13.12      |     |      | H   |    |        |       |        |      |  |
| ATOM       | 172 | HA   | CYS | 15 | 18.300 | 3.287 | 20.314 | 1.00 |  |
| 8.26       |     |      | H   |    |        |       |        |      |  |
| ATOM       | 173 | HB1  | CYS | 15 | 17.342 | 1.569 | 18.023 | 1.00 |  |
| 24.82      |     |      | H   |    |        |       |        |      |  |
| ATOM       | 174 | HB2  | CYS | 15 | 17.012 | 1.139 | 19.700 | 1.00 |  |
| 27.31      |     |      | H   |    |        |       |        |      |  |
| ATOM       | 175 | N    | VAL | 16 | 19.448 | 4.577 | 18.551 | 1.00 |  |
| 9.56       |     |      | N   |    |        |       |        |      |  |
| ATOM       | 176 | CA   | VAL | 16 | 20.106 | 5.400 | 17.542 | 1.00 |  |
| 11.99      |     |      | C   |    |        |       |        |      |  |
| ATOM       | 177 | C    | VAL | 16 | 21.619 | 5.280 | 17.663 | 1.00 |  |
| 7.73       |     |      | C   |    |        |       |        |      |  |
| ATOM       | 178 | O    | VAL | 16 | 22.177 | 5.380 | 18.755 | 1.00 |  |
| 8.83       |     |      | O   |    |        |       |        |      |  |
| ATOM       | 179 | CB   | VAL | 16 | 19.672 | 6.855 | 17.719 | 1.00 |  |
| 18.37      |     |      | C   |    |        |       |        |      |  |
| ATOM       | 180 | CG1  | VAL | 16 | 20.055 | 7.341 | 19.119 | 1.00 |  |
| 39.61      |     |      | C   |    |        |       |        |      |  |
| ATOM       | 181 | CG2  | VAL | 16 | 20.359 | 7.721 | 16.668 |      |  |
| 1.00115.21 |     |      | C   |    |        |       |        |      |  |
| ATOM       | 182 | HN   | VAL | 16 | 19.864 | 4.473 | 19.434 | 1.00 |  |
| 9.76       |     |      | H   |    |        |       |        |      |  |
| ATOM       | 183 | HA   | VAL | 16 | 19.810 | 5.067 | 16.557 | 1.00 |  |
| 17.27      |     |      | H   |    |        |       |        |      |  |
| ATOM       | 184 | HB   | VAL | 16 | 18.600 | 6.924 | 17.600 | 1.00 |  |
| 52.63      |     |      | H   |    |        |       |        |      |  |
| ATOM       | 185 | HG11 | VAL | 16 | 21.129 | 7.438 | 19.188 |      |  |
| 1.00128.07 |     |      | H   |    |        |       |        |      |  |
| ATOM       | 186 | HG12 | VAL | 16 | 19.709 | 6.630 | 19.856 |      |  |
| 1.00154.13 |     |      | H   |    |        |       |        |      |  |
| ATOM       | 187 | HG13 | VAL | 16 | 19.595 | 8.301 | 19.305 |      |  |
| 1.00135.74 |     |      | H   |    |        |       |        |      |  |
| ATOM       | 188 | HG21 | VAL | 16 | 19.947 | 8.719 | 16.699 |      |  |
| 1.00229.05 |     |      | H   |    |        |       |        |      |  |
| ATOM       | 189 | HG22 | VAL | 16 | 20.194 | 7.295 | 15.689 |      |  |
| 1.00261.82 |     |      | H   |    |        |       |        |      |  |
| ATOM       | 190 | HG23 | VAL | 16 | 21.418 | 7.763 | 16.870 |      |  |
| 1.00210.07 |     |      | H   |    |        |       |        |      |  |
| ATOM       | 191 | N    | ASP | 17 | 22.278 | 5.053 | 16.528 | 1.00 |  |
| 14.34      |     |      | N   |    |        |       |        |      |  |
| ATOM       | 192 | CA   | ASP | 17 | 23.733 | 4.910 | 16.506 | 1.00 |  |



|            |     |      |     |    |        |        |        |      |  |
|------------|-----|------|-----|----|--------|--------|--------|------|--|
| 11.90      |     |      | C   |    |        |        |        |      |  |
| ATOM       | 193 | C    | ASP | 17 | 24.401 | 6.236  | 16.159 | 1.00 |  |
| 13.15      |     |      | C   |    |        |        |        |      |  |
| ATOM       | 194 | O    | ASP | 17 | 24.165 | 6.801  | 15.093 | 1.00 |  |
| 25.96      |     |      | O   |    |        |        |        |      |  |
| ATOM       | 195 | CB   | ASP | 17 | 24.131 | 3.858  | 15.470 | 1.00 |  |
| 20.80      |     |      | C   |    |        |        |        |      |  |
| ATOM       | 196 | CG   | ASP | 17 | 23.724 | 2.469  | 15.953 | 1.00 |  |
| 28.72      |     |      | C   |    |        |        |        |      |  |
| ATOM       | 197 | OD1  | ASP | 17 | 23.419 | 2.337  | 17.127 |      |  |
| 1.00135.42 |     |      | O   |    |        |        |        |      |  |
| ATOM       | 198 | OD2  | ASP | 17 | 23.722 | 1.559  | 15.140 |      |  |
| 1.00114.17 |     |      | O1- |    |        |        |        |      |  |
| ATOM       | 199 | HN   | ASP | 17 | 21.777 | 4.976  | 15.690 | 1.00 |  |
| 28.29      |     |      | H   |    |        |        |        |      |  |
| ATOM       | 200 | HA   | ASP | 17 | 24.077 | 4.586  | 17.478 | 1.00 |  |
| 10.49      |     |      | H   |    |        |        |        |      |  |
| ATOM       | 201 | HB1  | ASP | 17 | 25.201 | 3.885  | 15.325 | 1.00 |  |
| 22.42      |     |      | H   |    |        |        |        |      |  |
| ATOM       | 202 | HB2  | ASP | 17 | 23.636 | 4.071  | 14.535 | 1.00 |  |
| 29.52      |     |      | H   |    |        |        |        |      |  |
| ATOM       | 203 | N    | THR | 18 | 25.248 | 6.716  | 17.066 | 1.00 |  |
| 11.55      |     |      | N   |    |        |        |        |      |  |
| ATOM       | 204 | CA   | THR | 18 | 25.971 | 7.972  | 16.857 | 1.00 |  |
| 17.10      |     |      | C   |    |        |        |        |      |  |
| ATOM       | 205 | C    | THR | 18 | 27.424 | 7.683  | 16.510 | 1.00 |  |
| 10.63      |     |      | C   |    |        |        |        |      |  |
| ATOM       | 206 | O    | THR | 18 | 27.905 | 6.572  | 16.714 | 1.00 |  |
| 6.49       |     |      | O   |    |        |        |        |      |  |
| ATOM       | 207 | CB   | THR | 18 | 25.921 | 8.829  | 18.123 | 1.00 |  |
| 28.52      |     |      | C   |    |        |        |        |      |  |
| ATOM       | 208 | CG2  | THR | 18 | 24.495 | 9.316  | 18.373 | 1.00 |  |
| 45.38      |     |      | C   |    |        |        |        |      |  |
| ATOM       | 209 | OG1  | THR | 18 | 26.364 | 8.058  | 19.228 | 1.00 |  |
| 26.49      |     |      | O   |    |        |        |        |      |  |
| ATOM       | 210 | HN   | THR | 18 | 25.399 | 6.211  | 17.893 | 1.00 |  |
| 13.96      |     |      | H   |    |        |        |        |      |  |
| ATOM       | 211 | HA   | THR | 18 | 25.516 | 8.524  | 16.044 | 1.00 |  |
| 26.43      |     |      | H   |    |        |        |        |      |  |
| ATOM       | 212 | HB   | THR | 18 | 26.570 | 9.683  | 18.002 | 1.00 |  |
| 37.43      |     |      | H   |    |        |        |        |      |  |
| ATOM       | 213 | HG1  | THR | 18 | 25.730 | 8.171  | 19.940 | 1.00 |  |
| 71.62      |     |      | H   |    |        |        |        |      |  |
| ATOM       | 214 | HG21 | THR | 18 | 24.398 | 9.627  | 19.402 |      |  |
| 1.00100.44 |     |      | H   |    |        |        |        |      |  |
| ATOM       | 215 | HG22 | THR | 18 | 23.797 | 8.516  | 18.170 |      |  |
| 1.00129.42 |     |      | H   |    |        |        |        |      |  |
| ATOM       | 216 | HG23 | THR | 18 | 24.285 | 10.152 | 17.724 |      |  |
| 1.00156.21 |     |      | H   |    |        |        |        |      |  |
| ATOM       | 217 | N    | VAL | 19 | 28.113 | 8.699  | 16.004 | 1.00 |  |
| 16.32      |     |      | N   |    |        |        |        |      |  |
| ATOM       | 218 | CA   | VAL | 19 | 29.506 | 8.577  | 15.644 | 1.00 |  |

|            |     |      |     |    |        |        |        |      |  |
|------------|-----|------|-----|----|--------|--------|--------|------|--|
| 13.34      |     |      | C   |    |        |        |        |      |  |
| ATOM       | 219 | C    | VAL | 19 | 29.973 | 9.872  | 15.013 | 1.00 |  |
| 25.88      |     |      | C   |    |        |        |        |      |  |
| ATOM       | 220 | O    | VAL | 19 | 29.468 | 10.308 | 13.978 | 1.00 |  |
| 42.11      |     |      | O   |    |        |        |        |      |  |
| ATOM       | 221 | CB   | VAL | 19 | 29.752 | 7.417  | 14.681 | 1.00 |  |
| 15.48      |     |      | C   |    |        |        |        |      |  |
| ATOM       | 222 | CG1  | VAL | 19 | 28.784 | 7.497  | 13.496 | 1.00 |  |
| 29.06      |     |      | C   |    |        |        |        |      |  |
| ATOM       | 223 | CG2  | VAL | 19 | 31.198 | 7.493  | 14.169 | 1.00 |  |
| 20.67      |     |      | C   |    |        |        |        |      |  |
| ATOM       | 224 | HN   | VAL | 19 | 27.681 | 9.566  | 15.889 | 1.00 |  |
| 26.89      |     |      | H   |    |        |        |        |      |  |
| ATOM       | 225 | HA   | VAL | 19 | 30.078 | 8.406  | 16.544 | 1.00 |  |
| 8.08       |     |      | H   |    |        |        |        |      |  |
| ATOM       | 226 | HB   | VAL | 19 | 29.610 | 6.488  | 15.204 | 1.00 |  |
| 11.49      |     |      | H   |    |        |        |        |      |  |
| ATOM       | 227 | HG11 | VAL | 19 | 27.784 | 7.690  | 13.858 |      |  |
| 1.00137.43 |     |      |     | H  |        |        |        |      |  |
| ATOM       | 228 | HG12 | VAL | 19 | 28.795 | 6.560  | 12.958 | 1.00 |  |
| 93.29      |     |      | H   |    |        |        |        |      |  |
| ATOM       | 229 | HG13 | VAL | 19 | 29.087 | 8.294  | 12.833 |      |  |
| 1.00108.69 |     |      |     | H  |        |        |        |      |  |
| ATOM       | 230 | HG21 | VAL | 19 | 31.480 | 6.547  | 13.733 | 1.00 |  |
| 99.42      |     |      | H   |    |        |        |        |      |  |
| ATOM       | 231 | HG22 | VAL | 19 | 31.860 | 7.726  | 14.994 |      |  |
| 1.00111.36 |     |      |     | H  |        |        |        |      |  |
| ATOM       | 232 | HG23 | VAL | 19 | 31.274 | 8.273  | 13.423 | 1.00 |  |
| 77.11      |     |      | H   |    |        |        |        |      |  |
| ATOM       | 233 | N    | PHE | 20 | 30.932 | 10.473 | 15.666 | 1.00 |  |
| 24.58      |     |      | N   |    |        |        |        |      |  |
| ATOM       | 234 | CA   | PHE | 20 | 31.503 | 11.734 | 15.226 | 1.00 |  |
| 40.34      |     |      | C   |    |        |        |        |      |  |
| ATOM       | 235 | C    | PHE | 20 | 32.798 | 11.503 | 14.455 | 1.00 |  |
| 40.37      |     |      | C   |    |        |        |        |      |  |
| ATOM       | 236 | O    | PHE | 20 | 32.896 | 11.848 | 13.278 | 1.00 |  |
| 66.02      |     |      | O   |    |        |        |        |      |  |
| ATOM       | 237 | CB   | PHE | 20 | 31.767 | 12.634 | 16.450 | 1.00 |  |
| 48.79      |     |      | C   |    |        |        |        |      |  |
| ATOM       | 238 | CG   | PHE | 20 | 32.031 | 11.799 | 17.697 | 1.00 |  |
| 35.75      |     |      | C   |    |        |        |        |      |  |
| ATOM       | 239 | CD1  | PHE | 20 | 31.015 | 10.997 | 18.255 | 1.00 |  |
| 30.20      |     |      | C   |    |        |        |        |      |  |
| ATOM       | 240 | CD2  | PHE | 20 | 33.291 | 11.844 | 18.309 | 1.00 |  |
| 40.95      |     |      | C   |    |        |        |        |      |  |
| ATOM       | 241 | CE1  | PHE | 20 | 31.270 | 10.249 | 19.408 | 1.00 |  |
| 30.41      |     |      | C   |    |        |        |        |      |  |
| ATOM       | 242 | CE2  | PHE | 20 | 33.541 | 11.091 | 19.462 | 1.00 |  |
| 45.84      |     |      | C   |    |        |        |        |      |  |
| ATOM       | 243 | CZ   | PHE | 20 | 32.531 | 10.294 | 20.011 | 1.00 |  |
| 40.81      |     |      | C   |    |        |        |        |      |  |
| ATOM       | 244 | HN   | PHE | 20 | 31.256 | 10.060 | 16.484 | 1.00 |  |

|            |     |     |     |    |        |        |        |      |  |
|------------|-----|-----|-----|----|--------|--------|--------|------|--|
| 16.73      |     |     | H   |    |        |        |        |      |  |
| ATOM       | 245 | HA  | PHE | 20 | 30.802 | 12.236 | 14.572 | 1.00 |  |
| 59.91      |     |     | H   |    |        |        |        |      |  |
| ATOM       | 246 | HB1 | PHE | 20 | 30.909 | 13.242 | 16.618 | 1.00 |  |
| 67.15      |     |     | H   |    |        |        |        |      |  |
| ATOM       | 247 | HB2 | PHE | 20 | 32.616 | 13.276 | 16.261 | 1.00 |  |
| 58.17      |     |     | H   |    |        |        |        |      |  |
| ATOM       | 248 | HD1 | PHE | 20 | 30.036 | 10.948 | 17.795 | 1.00 |  |
| 33.34      |     |     | H   |    |        |        |        |      |  |
| ATOM       | 249 | HD2 | PHE | 20 | 34.074 | 12.456 | 17.889 | 1.00 |  |
| 49.35      |     |     | H   |    |        |        |        |      |  |
| ATOM       | 250 | HE1 | PHE | 20 | 30.491 | 9.636  | 19.831 | 1.00 |  |
| 30.61      |     |     | H   |    |        |        |        |      |  |
| ATOM       | 251 | HE2 | PHE | 20 | 34.514 | 11.125 | 19.929 | 1.00 |  |
| 61.27      |     |     | H   |    |        |        |        |      |  |
| ATOM       | 252 | HZ  | PHE | 20 | 32.724 | 9.715  | 20.902 | 1.00 |  |
| 52.66      |     |     | H   |    |        |        |        |      |  |
| ATOM       | 253 | N   | GLU | 21 | 33.798 | 10.950 | 15.134 | 1.00 |  |
| 41.31      |     |     | N   |    |        |        |        |      |  |
| ATOM       | 254 | CA  | GLU | 21 | 35.089 | 10.714 | 14.527 | 1.00 |  |
| 56.16      |     |     | C   |    |        |        |        |      |  |
| ATOM       | 255 | C   | GLU | 21 | 35.366 | 9.225  | 14.369 | 1.00 |  |
| 58.61      |     |     | C   |    |        |        |        |      |  |
| ATOM       | 256 | O   | GLU | 21 | 34.495 | 8.388  | 14.606 |      |  |
| 1.00201.19 |     |     | O   |    |        |        |        |      |  |
| ATOM       | 257 | CB  | GLU | 21 | 36.123 | 11.349 | 15.428 | 1.00 |  |
| 57.37      |     |     | C   |    |        |        |        |      |  |
| ATOM       | 258 | CG  | GLU | 21 | 36.150 | 10.617 | 16.765 |      |  |
| 1.00193.56 |     |     | C   |    |        |        |        |      |  |
| ATOM       | 259 | CD  | GLU | 21 | 36.983 | 11.401 | 17.774 |      |  |
| 1.00304.62 |     |     | C   |    |        |        |        |      |  |
| ATOM       | 260 | OE1 | GLU | 21 | 37.593 | 12.379 | 17.375 |      |  |
| 1.00451.81 |     |     | O   |    |        |        |        |      |  |
| ATOM       | 261 | OE2 | GLU | 21 | 36.996 | 11.015 | 18.930 |      |  |
| 1.00442.88 |     |     | O1- |    |        |        |        |      |  |
| ATOM       | 262 | HN  | GLU | 21 | 33.682 | 10.723 | 16.075 | 1.00 |  |
| 50.82      |     |     | H   |    |        |        |        |      |  |
| ATOM       | 263 | HA  | GLU | 21 | 35.137 | 11.188 | 13.556 | 1.00 |  |
| 85.72      |     |     | H   |    |        |        |        |      |  |
| ATOM       | 264 | HB1 | GLU | 21 | 35.851 | 12.380 | 15.595 | 1.00 |  |
| 46.37      |     |     | H   |    |        |        |        |      |  |
| ATOM       | 265 | HB2 | GLU | 21 | 37.084 | 11.295 | 14.963 |      |  |
| 1.00131.81 |     |     | H   |    |        |        |        |      |  |
| ATOM       | 266 | HG1 | GLU | 21 | 36.579 | 9.641  | 16.626 |      |  |
| 1.00314.91 |     |     | H   |    |        |        |        |      |  |
| ATOM       | 267 | HG2 | GLU | 21 | 35.143 | 10.508 | 17.135 |      |  |
| 1.00266.92 |     |     | H   |    |        |        |        |      |  |
| ATOM       | 268 | N   | GLY | 22 | 36.587 | 8.908  | 13.953 | 1.00 |  |
| 86.70      |     |     | N   |    |        |        |        |      |  |
| ATOM       | 269 | CA  | GLY | 22 | 36.989 | 7.514  | 13.742 |      |  |
| 1.00104.66 |     |     | C   |    |        |        |        |      |  |
| ATOM       | 270 | C   | GLY | 22 | 37.678 | 6.927  | 14.972 | 1.00 |  |

|            |     |     |     |     |        |        |        |      |  |
|------------|-----|-----|-----|-----|--------|--------|--------|------|--|
| 71.50      |     |     | C   |     |        |        |        |      |  |
| ATOM       | 271 | O   | GLY | 22  | 37.891 | 5.717  | 15.052 | 1.00 |  |
| 89.87      |     |     | O   |     |        |        |        |      |  |
| ATOM       | 272 | HN  | GLY | 22  | 37.227 | 9.630  | 13.777 |      |  |
| 1.00214.64 |     |     |     | H   |        |        |        |      |  |
| ATOM       | 273 | HA1 | GLY | 22  | 37.674 | 7.472  | 12.907 |      |  |
| 1.00152.47 |     |     |     | H   |        |        |        |      |  |
| ATOM       | 274 | HA2 | GLY | 22  | 36.117 | 6.919  | 13.509 |      |  |
| 1.00118.15 |     |     |     | H   |        |        |        |      |  |
| ATOM       | 275 | N   | ASP | 23  | 38.033 | 7.783  | 15.923 | 1.00 |  |
| 44.68      |     |     | N   |     |        |        |        |      |  |
| ATOM       | 276 | CA  | ASP | 23  | 38.706 | 7.323  | 17.134 | 1.00 |  |
| 43.33      |     |     | C   |     |        |        |        |      |  |
| ATOM       | 277 | C   | ASP | 23  | 37.827 | 6.350  | 17.913 | 1.00 |  |
| 37.55      |     |     | C   |     |        |        |        |      |  |
| ATOM       | 278 | O   | ASP | 23  | 38.313 | 5.362  | 18.460 | 1.00 |  |
| 61.37      |     |     | O   |     |        |        |        |      |  |
| ATOM       | 279 | CB  | ASP | 23  | 39.056 | 8.513  | 18.031 | 1.00 |  |
| 40.74      |     |     | C   |     |        |        |        |      |  |
| ATOM       | 280 | CG  | ASP | 23  | 40.172 | 9.335  | 17.397 |      |  |
| 1.00141.86 |     |     |     | C   |        |        |        |      |  |
| ATOM       | 281 | OD1 | ASP | 23  | 40.791 | 8.841  | 16.468 |      |  |
| 1.00328.18 |     |     |     | O   |        |        |        |      |  |
| ATOM       | 282 | OD2 | ASP | 23  | 40.392 | 10.448 | 17.848 |      |  |
| 1.00304.58 |     |     |     | O1- |        |        |        |      |  |
| ATOM       | 283 | HN  | ASP | 23  | 37.849 | 8.738  | 15.806 | 1.00 |  |
| 40.86      |     |     | H   |     |        |        |        |      |  |
| ATOM       | 284 | HA  | ASP | 23  | 39.615 | 6.821  | 16.856 | 1.00 |  |
| 72.12      |     |     | H   |     |        |        |        |      |  |
| ATOM       | 285 | HB1 | ASP | 23  | 39.385 | 8.150  | 18.993 | 1.00 |  |
| 94.15      |     |     | H   |     |        |        |        |      |  |
| ATOM       | 286 | HB2 | ASP | 23  | 38.181 | 9.131  | 18.164 | 1.00 |  |
| 93.26      |     |     | H   |     |        |        |        |      |  |
| ATOM       | 287 | N   | MET | 24  | 36.531 | 6.641  | 17.963 | 1.00 |  |
| 23.24      |     |     | N   |     |        |        |        |      |  |
| ATOM       | 288 | CA  | MET | 24  | 35.594 | 5.785  | 18.685 | 1.00 |  |
| 32.50      |     |     | C   |     |        |        |        |      |  |
| ATOM       | 289 | C   | MET | 24  | 34.170 | 5.978  | 18.174 | 1.00 |  |
| 25.13      |     |     | C   |     |        |        |        |      |  |
| ATOM       | 290 | O   | MET | 24  | 33.886 | 6.917  | 17.432 | 1.00 |  |
| 54.40      |     |     | O   |     |        |        |        |      |  |
| ATOM       | 291 | CB  | MET | 24  | 35.651 | 6.102  | 20.183 | 1.00 |  |
| 47.36      |     |     | C   |     |        |        |        |      |  |
| ATOM       | 292 | CG  | MET | 24  | 35.217 | 7.552  | 20.422 |      |  |
| 1.00151.73 |     |     |     | C   |        |        |        |      |  |
| ATOM       | 293 | SD  | MET | 24  | 35.420 | 7.969  | 22.175 |      |  |
| 1.00209.23 |     |     |     | S   |        |        |        |      |  |
| ATOM       | 294 | CE  | MET | 24  | 37.217 | 8.208  | 22.178 |      |  |
| 1.00243.29 |     |     |     | C   |        |        |        |      |  |
| ATOM       | 295 | HN  | MET | 24  | 36.203 | 7.445  | 17.511 | 1.00 |  |
| 17.32      |     |     | H   |     |        |        |        |      |  |
| ATOM       | 296 | HA  | MET | 24  | 35.877 | 4.753  | 18.540 | 1.00 |  |

|            |     |      |     |    |        |       |        |      |  |
|------------|-----|------|-----|----|--------|-------|--------|------|--|
| 48.94      |     |      | H   |    |        |       |        |      |  |
| ATOM       | 297 | HB1  | MET | 24 | 36.659 | 5.966 | 20.539 |      |  |
| 1.00124.40 |     |      | H   |    |        |       |        |      |  |
| ATOM       | 298 | HB2  | MET | 24 | 34.988 | 5.436 | 20.716 |      |  |
| 1.00166.96 |     |      | H   |    |        |       |        |      |  |
| ATOM       | 299 | HG1  | MET | 24 | 34.179 | 7.667 | 20.147 |      |  |
| 1.00331.71 |     |      | H   |    |        |       |        |      |  |
| ATOM       | 300 | HG2  | MET | 24 | 35.821 | 8.213 | 19.820 |      |  |
| 1.00302.30 |     |      | H   |    |        |       |        |      |  |
| ATOM       | 301 | HE1  | MET | 24 | 37.501 | 8.759 | 23.064 |      |  |
| 1.00340.44 |     |      | H   |    |        |       |        |      |  |
| ATOM       | 302 | HE2  | MET | 24 | 37.512 | 8.769 | 21.304 |      |  |
| 1.00373.88 |     |      | H   |    |        |       |        |      |  |
| ATOM       | 303 | HE3  | MET | 24 | 37.710 | 7.247 | 22.171 |      |  |
| 1.00386.81 |     |      | H   |    |        |       |        |      |  |
| ATOM       | 304 | N    | VAL | 25 | 33.275 | 5.077 | 18.583 | 1.00 |  |
| 22.44      |     |      | N   |    |        |       |        |      |  |
| ATOM       | 305 | CA   | VAL | 25 | 31.869 | 5.136 | 18.175 | 1.00 |  |
| 15.37      |     |      | C   |    |        |       |        |      |  |
| ATOM       | 306 | C    | VAL | 25 | 30.960 | 5.172 | 19.398 | 1.00 |  |
| 17.47      |     |      | C   |    |        |       |        |      |  |
| ATOM       | 307 | O    | VAL | 25 | 31.271 | 4.590 | 20.438 | 1.00 |  |
| 29.52      |     |      | O   |    |        |       |        |      |  |
| ATOM       | 308 | CB   | VAL | 25 | 31.513 | 3.925 | 17.306 | 1.00 |  |
| 23.36      |     |      | C   |    |        |       |        |      |  |
| ATOM       | 309 | CG1  | VAL | 25 | 30.000 | 3.922 | 17.019 | 1.00 |  |
| 58.39      |     |      | C   |    |        |       |        |      |  |
| ATOM       | 310 | CG2  | VAL | 25 | 32.291 | 4.011 | 15.989 | 1.00 |  |
| 55.25      |     |      | C   |    |        |       |        |      |  |
| ATOM       | 311 | HN   | VAL | 25 | 33.568 | 4.354 | 19.177 | 1.00 |  |
| 48.11      |     |      | H   |    |        |       |        |      |  |
| ATOM       | 312 | HA   | VAL | 25 | 31.698 | 6.040 | 17.599 | 1.00 |  |
| 9.25       |     |      | H   |    |        |       |        |      |  |
| ATOM       | 313 | HB   | VAL | 25 | 31.781 | 3.019 | 17.828 | 1.00 |  |
| 52.45      |     |      | H   |    |        |       |        |      |  |
| ATOM       | 314 | HG11 | VAL | 25 | 29.801 | 3.369 | 16.113 |      |  |
| 1.00171.07 |     |      | H   |    |        |       |        |      |  |
| ATOM       | 315 | HG12 | VAL | 25 | 29.648 | 4.938 | 16.904 |      |  |
| 1.00166.22 |     |      | H   |    |        |       |        |      |  |
| ATOM       | 316 | HG13 | VAL | 25 | 29.482 | 3.457 | 17.843 |      |  |
| 1.00134.76 |     |      | H   |    |        |       |        |      |  |
| ATOM       | 317 | HG21 | VAL | 25 | 33.351 | 4.000 | 16.194 |      |  |
| 1.00141.88 |     |      | H   |    |        |       |        |      |  |
| ATOM       | 318 | HG22 | VAL | 25 | 32.033 | 4.926 | 15.476 |      |  |
| 1.00184.50 |     |      | H   |    |        |       |        |      |  |
| ATOM       | 319 | HG23 | VAL | 25 | 32.037 | 3.166 | 15.365 |      |  |
| 1.00133.90 |     |      | H   |    |        |       |        |      |  |
| ATOM       | 320 | N    | THR | 26 | 29.840 | 5.879 | 19.265 | 1.00 |  |
| 13.60      |     |      | N   |    |        |       |        |      |  |
| ATOM       | 321 | CA   | THR | 26 | 28.878 | 6.027 | 20.356 | 1.00 |  |
| 21.19      |     |      | C   |    |        |       |        |      |  |
| ATOM       | 322 | C    | THR | 26 | 27.479 | 5.594 | 19.922 | 1.00 |  |

|            |     |      |     |     |        |        |        |      |  |
|------------|-----|------|-----|-----|--------|--------|--------|------|--|
| 16.55      |     |      | C   |     |        |        |        |      |  |
| ATOM       | 323 | O    | THR | 26  | 27.063 | 5.839  | 18.790 | 1.00 |  |
| 11.43      |     |      | O   |     |        |        |        |      |  |
| ATOM       | 324 | CB   | THR | 26  | 28.851 | 7.491  | 20.784 | 1.00 |  |
| 27.07      |     |      | C   |     |        |        |        |      |  |
| ATOM       | 325 | CG2  | THR | 26  | 27.805 | 7.698  | 21.880 | 1.00 |  |
| 44.39      |     |      | C   |     |        |        |        |      |  |
| ATOM       | 326 | OG1  | THR | 26  | 30.134 | 7.851  | 21.277 | 1.00 |  |
| 34.75      |     |      | O   |     |        |        |        |      |  |
| ATOM       | 327 | HN   | THR | 26  | 29.665 | 6.328  | 18.411 | 1.00 |  |
| 10.81      |     |      | H   |     |        |        |        |      |  |
| ATOM       | 328 | HA   | THR | 26  | 29.185 | 5.425  | 21.199 | 1.00 |  |
| 33.16      |     |      | H   |     |        |        |        |      |  |
| ATOM       | 329 | HB   | THR | 26  | 28.608 | 8.104  | 19.925 | 1.00 |  |
| 20.60      |     |      | H   |     |        |        |        |      |  |
| ATOM       | 330 | HG1  | THR | 26  | 30.198 | 7.547  | 22.185 | 1.00 |  |
| 77.72      |     |      | H   |     |        |        |        |      |  |
| ATOM       | 331 | HG21 | THR | 26  | 27.906 | 8.693  | 22.288 |      |  |
| 1.00126.99 |     |      |     | H   |        |        |        |      |  |
| ATOM       | 332 | HG22 | THR | 26  | 27.958 | 6.971  | 22.665 |      |  |
| 1.00108.32 |     |      |     | H   |        |        |        |      |  |
| ATOM       | 333 | HG23 | THR | 26  | 26.816 | 7.580  | 21.468 |      |  |
| 1.00151.99 |     |      |     | H   |        |        |        |      |  |
| ATOM       | 334 | N    | ARG | 27  | 26.755 | 4.947  | 20.838 | 1.00 |  |
| 22.38      |     |      | N   |     |        |        |        |      |  |
| ATOM       | 335 | CA   | ARG | 27  | 25.395 | 4.479  | 20.557 | 1.00 |  |
| 20.21      |     |      | C   |     |        |        |        |      |  |
| ATOM       | 336 | C    | ARG | 27  | 24.482 | 4.764  | 21.748 | 1.00 |  |
| 16.96      |     |      | C   |     |        |        |        |      |  |
| ATOM       | 337 | O    | ARG | 27  | 24.948 | 4.876  | 22.881 | 1.00 |  |
| 20.06      |     |      | O   |     |        |        |        |      |  |
| ATOM       | 338 | CB   | ARG | 27  | 25.415 | 2.974  | 20.271 | 1.00 |  |
| 22.14      |     |      | C   |     |        |        |        |      |  |
| ATOM       | 339 | CG   | ARG | 27  | 25.853 | 2.215  | 21.527 |      |  |
| 1.00124.30 |     |      |     | C   |        |        |        |      |  |
| ATOM       | 340 | CD   | ARG | 27  | 26.068 | 0.741  | 21.184 |      |  |
| 1.00109.38 |     |      |     | C   |        |        |        |      |  |
| ATOM       | 341 | NE   | ARG | 27  | 26.423 | -0.010 | 22.383 |      |  |
| 1.00227.73 |     |      |     | N   |        |        |        |      |  |
| ATOM       | 342 | CZ   | ARG | 27  | 27.670 | -0.020 | 22.846 |      |  |
| 1.00426.12 |     |      |     | C   |        |        |        |      |  |
| ATOM       | 343 | NH1  | ARG | 27  | 27.960 | -0.700 | 23.921 |      |  |
| 1.00767.09 |     |      |     | N1+ |        |        |        |      |  |
| ATOM       | 344 | NH2  | ARG | 27  | 28.602 | 0.650  | 22.226 |      |  |
| 1.00581.78 |     |      |     | N   |        |        |        |      |  |
| ATOM       | 345 | HN   | ARG | 27  | 27.142 | 4.784  | 21.722 | 1.00 |  |
| 30.75      |     |      | H   |     |        |        |        |      |  |
| ATOM       | 346 | HA   | ARG | 27  | 25.005 | 4.994  | 19.688 | 1.00 |  |
| 23.13      |     |      | H   |     |        |        |        |      |  |
| ATOM       | 347 | HB1  | ARG | 27  | 26.109 | 2.771  | 19.470 | 1.00 |  |
| 87.46      |     |      | H   |     |        |        |        |      |  |
| ATOM       | 348 | HB2  | ARG | 27  | 24.426 | 2.650  | 19.980 |      |  |

|            |     |      |     |   |    |        |        |        |      |  |
|------------|-----|------|-----|---|----|--------|--------|--------|------|--|
| 1.00103.36 |     |      |     | H |    |        |        |        |      |  |
| ATOM       | 349 | HG1  | ARG |   | 27 | 25.088 | 2.297  | 22.285 |      |  |
| 1.00281.97 |     |      |     | H |    |        |        |        |      |  |
| ATOM       | 350 | HG2  | ARG |   | 27 | 26.775 | 2.638  | 21.899 |      |  |
| 1.00276.19 |     |      |     | H |    |        |        |        |      |  |
| ATOM       | 351 | HD1  | ARG |   | 27 | 26.864 | 0.657  | 20.456 |      |  |
| 1.00183.60 |     |      |     | H |    |        |        |        |      |  |
| ATOM       | 352 | HD2  | ARG |   | 27 | 25.161 | 0.337  | 20.767 |      |  |
| 1.00142.93 |     |      |     | H |    |        |        |        |      |  |
| ATOM       | 353 | HE   | ARG |   | 27 | 25.731 | -0.516 | 22.856 |      |  |
| 1.00372.53 |     |      |     | H |    |        |        |        |      |  |
| ATOM       | 354 | HH11 | ARG |   | 27 | 27.245 | -1.214 | 24.397 |      |  |
| 1.00910.59 |     |      |     | H |    |        |        |        |      |  |
| ATOM       | 355 | HH12 | ARG |   | 27 | 28.897 | -0.709 | 24.269 |      |  |
| 1.00999.99 |     |      |     | H |    |        |        |        |      |  |
| ATOM       | 356 | HH21 | ARG |   | 27 | 28.380 | 1.171  | 21.403 |      |  |
| 1.00532.54 |     |      |     | H |    |        |        |        |      |  |
| ATOM       | 357 | HH22 | ARG |   | 27 | 29.540 | 0.642  | 22.575 |      |  |
| 1.00948.84 |     |      |     | H |    |        |        |        |      |  |
| ATOM       | 358 | N    | SER |   | 28 | 23.178 | 4.889  | 21.486 | 1.00 |  |
| 14.60      |     |      | N   |   |    |        |        |        |      |  |
| ATOM       | 359 | CA   | SER |   | 28 | 22.207 | 5.171  | 22.549 | 1.00 |  |
| 14.92      |     |      | C   |   |    |        |        |        |      |  |
| ATOM       | 360 | C    | SER |   | 28 | 20.984 | 4.265  | 22.427 | 1.00 |  |
| 12.12      |     |      | C   |   |    |        |        |        |      |  |
| ATOM       | 361 | O    | SER |   | 28 | 20.609 | 3.850  | 21.331 | 1.00 |  |
| 13.41      |     |      | O   |   |    |        |        |        |      |  |
| ATOM       | 362 | CB   | SER |   | 28 | 21.767 | 6.633  | 22.474 | 1.00 |  |
| 23.26      |     |      | C   |   |    |        |        |        |      |  |
| ATOM       | 363 | OG   | SER |   | 28 | 22.893 | 7.474  | 22.687 |      |  |
| 1.00146.32 |     |      |     | O |    |        |        |        |      |  |
| ATOM       | 364 | HN   | SER |   | 28 | 22.861 | 4.795  | 20.562 | 1.00 |  |
| 15.23      |     |      | H   |   |    |        |        |        |      |  |
| ATOM       | 365 | HA   | SER |   | 28 | 22.668 | 4.999  | 23.512 | 1.00 |  |
| 15.44      |     |      | H   |   |    |        |        |        |      |  |
| ATOM       | 366 | HB1  | SER |   | 28 | 21.017 | 6.821  | 23.231 | 1.00 |  |
| 88.73      |     |      | H   |   |    |        |        |        |      |  |
| ATOM       | 367 | HB2  | SER |   | 28 | 21.352 | 6.838  | 21.503 |      |  |
| 1.00124.68 |     |      |     | H |    |        |        |        |      |  |
| ATOM       | 368 | HG   | SER |   | 28 | 22.693 | 8.060  | 23.420 |      |  |
| 1.00242.47 |     |      |     | H |    |        |        |        |      |  |
| ATOM       | 369 | N    | CYS |   | 29 | 20.365 | 3.972  | 23.568 | 1.00 |  |
| 10.48      |     |      | N   |   |    |        |        |        |      |  |
| ATOM       | 370 | CA   | CYS |   | 29 | 19.178 | 3.123  | 23.604 | 1.00 |  |
| 9.97       |     |      | C   |   |    |        |        |        |      |  |
| ATOM       | 371 | C    | CYS |   | 29 | 18.653 | 3.054  | 25.038 | 1.00 |  |
| 11.60      |     |      | C   |   |    |        |        |        |      |  |
| ATOM       | 372 | O    | CYS |   | 29 | 19.411 | 2.776  | 25.968 | 1.00 |  |
| 15.64      |     |      | O   |   |    |        |        |        |      |  |
| ATOM       | 373 | CB   | CYS |   | 29 | 19.513 | 1.707  | 23.081 | 1.00 |  |
| 9.52       |     |      | C   |   |    |        |        |        |      |  |
| ATOM       | 374 | SG   | CYS |   | 29 | 18.115 | 1.053  | 22.150 | 1.00 |  |

|            |     |     |     |    |        |        |        |      |  |
|------------|-----|-----|-----|----|--------|--------|--------|------|--|
| 10.40      |     |     | S   |    |        |        |        |      |  |
| ATOM       | 375 | HN  | CYS | 29 | 20.709 | 4.343  | 24.407 | 1.00 |  |
| 11.10      |     |     | H   |    |        |        |        |      |  |
| ATOM       | 376 | HA  | CYS | 29 | 18.417 | 3.564  | 22.978 | 1.00 |  |
| 11.08      |     |     | H   |    |        |        |        |      |  |
| ATOM       | 377 | HB1 | CYS | 29 | 19.722 | 1.038  | 23.907 | 1.00 |  |
| 9.33       |     |     | H   |    |        |        |        |      |  |
| ATOM       | 378 | HB2 | CYS | 29 | 20.373 | 1.750  | 22.435 | 1.00 |  |
| 10.78      |     |     | H   |    |        |        |        |      |  |
| ATOM       | 379 | N   | GLU | 30 | 17.360 | 3.329  | 25.222 | 1.00 |  |
| 13.52      |     |     | N   |    |        |        |        |      |  |
| ATOM       | 380 | CA  | GLU | 30 | 16.760 | 3.311  | 26.561 | 1.00 |  |
| 17.41      |     |     | C   |    |        |        |        |      |  |
| ATOM       | 381 | C   | GLU | 30 | 15.854 | 2.100  | 26.746 | 1.00 |  |
| 10.81      |     |     | C   |    |        |        |        |      |  |
| ATOM       | 382 | O   | GLU | 30 | 14.993 | 1.822  | 25.914 | 1.00 |  |
| 23.22      |     |     | O   |    |        |        |        |      |  |
| ATOM       | 383 | CB  | GLU | 30 | 15.951 | 4.590  | 26.770 | 1.00 |  |
| 37.83      |     |     | C   |    |        |        |        |      |  |
| ATOM       | 384 | CG  | GLU | 30 | 16.884 | 5.798  | 26.673 |      |  |
| 1.00108.13 |     |     | C   |    |        |        |        |      |  |
| ATOM       | 385 | CD  | GLU | 30 | 16.094 | 7.085  | 26.879 |      |  |
| 1.00240.52 |     |     | C   |    |        |        |        |      |  |
| ATOM       | 386 | OE1 | GLU | 30 | 14.895 | 6.994  | 27.088 |      |  |
| 1.00422.56 |     |     | O   |    |        |        |        |      |  |
| ATOM       | 387 | OE2 | GLU | 30 | 16.698 | 8.144  | 26.825 |      |  |
| 1.00410.81 |     |     | O1- |    |        |        |        |      |  |
| ATOM       | 388 | HN  | GLU | 30 | 16.800 | 3.557  | 24.447 | 1.00 |  |
| 15.61      |     |     | H   |    |        |        |        |      |  |
| ATOM       | 389 | HA  | GLU | 30 | 17.543 | 3.276  | 27.308 | 1.00 |  |
| 24.60      |     |     | H   |    |        |        |        |      |  |
| ATOM       | 390 | HB1 | GLU | 30 | 15.490 | 4.570  | 27.747 | 1.00 |  |
| 72.67      |     |     | H   |    |        |        |        |      |  |
| ATOM       | 391 | HB2 | GLU | 30 | 15.185 | 4.661  | 26.010 | 1.00 |  |
| 56.47      |     |     | H   |    |        |        |        |      |  |
| ATOM       | 392 | HG1 | GLU | 30 | 17.347 | 5.815  | 25.697 |      |  |
| 1.00196.66 |     |     | H   |    |        |        |        |      |  |
| ATOM       | 393 | HG2 | GLU | 30 | 17.648 | 5.721  | 27.432 |      |  |
| 1.00140.67 |     |     | H   |    |        |        |        |      |  |
| ATOM       | 394 | N   | LYS | 31 | 16.053 | 1.388  | 27.852 | 1.00 |  |
| 11.96      |     |     | N   |    |        |        |        |      |  |
| ATOM       | 395 | CA  | LYS | 31 | 15.249 | 0.206  | 28.153 | 1.00 |  |
| 11.40      |     |     | C   |    |        |        |        |      |  |
| ATOM       | 396 | C   | LYS | 31 | 13.976 | 0.602  | 28.895 | 1.00 |  |
| 10.99      |     |     | C   |    |        |        |        |      |  |
| ATOM       | 397 | O   | LYS | 31 | 13.956 | 1.590  | 29.629 | 1.00 |  |
| 12.86      |     |     | O   |    |        |        |        |      |  |
| ATOM       | 398 | CB  | LYS | 31 | 16.059 | -0.768 | 29.011 | 1.00 |  |
| 21.40      |     |     | C   |    |        |        |        |      |  |
| ATOM       | 399 | CG  | LYS | 31 | 17.263 | -1.271 | 28.213 | 1.00 |  |
| 57.81      |     |     | C   |    |        |        |        |      |  |
| ATOM       | 400 | CD  | LYS | 31 | 18.075 | -2.244 | 29.069 |      |  |



|            |     |     |     |     |        |        |        |      |  |
|------------|-----|-----|-----|-----|--------|--------|--------|------|--|
| 1.00115.52 |     |     |     | C   |        |        |        |      |  |
| ATOM       | 401 | CE  | LYS | 31  | 19.301 | -2.715 | 28.283 |      |  |
| 1.00250.23 |     |     |     | C   |        |        |        |      |  |
| ATOM       | 402 | NZ  | LYS | 31  | 18.856 | -3.466 | 27.075 |      |  |
| 1.00462.10 |     |     |     | N1+ |        |        |        |      |  |
| ATOM       | 403 | HN  | LYS | 31  | 16.752 | 1.665  | 28.479 | 1.00 |  |
| 26.13      |     |     | H   |     |        |        |        |      |  |
| ATOM       | 404 | HA  | LYS | 31  | 14.979 | -0.286 | 27.231 | 1.00 |  |
| 13.87      |     |     | H   |     |        |        |        |      |  |
| ATOM       | 405 | HB1 | LYS | 31  | 15.437 | -1.607 | 29.287 | 1.00 |  |
| 37.63      |     |     | H   |     |        |        |        |      |  |
| ATOM       | 406 | HB2 | LYS | 31  | 16.401 | -0.264 | 29.903 | 1.00 |  |
| 47.19      |     |     | H   |     |        |        |        |      |  |
| ATOM       | 407 | HG1 | LYS | 31  | 17.886 | -0.434 | 27.934 |      |  |
| 1.00126.32 |     |     |     | H   |        |        |        |      |  |
| ATOM       | 408 | HG2 | LYS | 31  | 16.919 | -1.776 | 27.322 |      |  |
| 1.00114.19 |     |     |     | H   |        |        |        |      |  |
| ATOM       | 409 | HD1 | LYS | 31  | 17.464 | -3.097 | 29.325 |      |  |
| 1.00198.45 |     |     |     | H   |        |        |        |      |  |
| ATOM       | 410 | HD2 | LYS | 31  | 18.397 | -1.747 | 29.974 |      |  |
| 1.00200.14 |     |     |     | H   |        |        |        |      |  |
| ATOM       | 411 | HE1 | LYS | 31  | 19.903 | -3.359 | 28.908 |      |  |
| 1.00374.64 |     |     |     | H   |        |        |        |      |  |
| ATOM       | 412 | HE2 | LYS | 31  | 19.884 | -1.859 | 27.980 |      |  |
| 1.00403.27 |     |     |     | H   |        |        |        |      |  |
| ATOM       | 413 | HZ1 | LYS | 31  | 19.470 | -4.293 | 26.935 |      |  |
| 1.00627.38 |     |     |     | H   |        |        |        |      |  |
| ATOM       | 414 | HZ2 | LYS | 31  | 18.913 | -2.845 | 26.242 |      |  |
| 1.00622.26 |     |     |     | H   |        |        |        |      |  |
| ATOM       | 415 | HZ3 | LYS | 31  | 17.874 | -3.782 | 27.205 |      |  |
| 1.00619.20 |     |     |     | H   |        |        |        |      |  |
| ATOM       | 416 | N   | THR | 32  | 12.915 | -0.178 | 28.701 | 1.00 |  |
| 15.51      |     |     | N   |     |        |        |        |      |  |
| ATOM       | 417 | CA  | THR | 32  | 11.635 | 0.092  | 29.356 | 1.00 |  |
| 22.44      |     |     | C   |     |        |        |        |      |  |
| ATOM       | 418 | C   | THR | 32  | 11.509 | -0.727 | 30.637 | 1.00 |  |
| 26.60      |     |     | C   |     |        |        |        |      |  |
| ATOM       | 419 | O   | THR | 32  | 11.599 | -1.954 | 30.611 | 1.00 |  |
| 57.43      |     |     | O   |     |        |        |        |      |  |
| ATOM       | 420 | CB  | THR | 32  | 10.484 | -0.264 | 28.412 | 1.00 |  |
| 56.28      |     |     | C   |     |        |        |        |      |  |
| ATOM       | 421 | CG2 | THR | 32  | 9.149  | -0.010 | 29.112 |      |  |
| 1.00102.70 |     |     |     | C   |        |        |        |      |  |
| ATOM       | 422 | OG1 | THR | 32  | 10.569 | 0.538  | 27.242 |      |  |
| 1.00111.17 |     |     |     | O   |        |        |        |      |  |
| ATOM       | 423 | HN  | THR | 32  | 12.994 | -0.952 | 28.105 | 1.00 |  |
| 18.79      |     |     | H   |     |        |        |        |      |  |
| ATOM       | 424 | HA  | THR | 32  | 11.568 | 1.144  | 29.601 | 1.00 |  |
| 19.67      |     |     | H   |     |        |        |        |      |  |
| ATOM       | 425 | HB  | THR | 32  | 10.550 | -1.305 | 28.140 | 1.00 |  |
| 84.25      |     |     | H   |     |        |        |        |      |  |
| ATOM       | 426 | HG1 | THR | 32  | 10.302 | 1.431  | 27.474 |      |  |

|            |     |      |     |   |    |        |        |        |      |
|------------|-----|------|-----|---|----|--------|--------|--------|------|
| 1.00205.03 |     |      |     | H |    |        |        |        |      |
| ATOM       | 427 | HG21 | THR |   | 32 | 8.999  | -0.752 | 29.882 |      |
| 1.00220.71 |     |      |     | H |    |        |        |        |      |
| ATOM       | 428 | HG22 | THR |   | 32 | 8.347  | -0.074 | 28.392 |      |
| 1.00174.67 |     |      |     | H |    |        |        |        |      |
| ATOM       | 429 | HG23 | THR |   | 32 | 9.156  | 0.973  | 29.557 |      |
| 1.00217.44 |     |      |     | H |    |        |        |        |      |
| ATOM       | 430 | N    | THR |   | 33 | 11.297 | -0.040 | 31.759 | 1.00 |
| 22.47      |     |      | N   |   |    |        |        |        |      |
| ATOM       | 431 | CA   | THR |   | 33 | 11.156 | -0.711 | 33.051 | 1.00 |
| 41.60      |     |      | C   |   |    |        |        |        |      |
| ATOM       | 432 | C    | THR |   | 33 | 10.179 | 0.018  | 33.929 | 1.00 |
| 38.03      |     |      | C   |   |    |        |        |        |      |
| ATOM       | 433 | O    | THR |   | 33 | 10.554 | 0.821  | 34.784 | 1.00 |
| 52.73      |     |      | O   |   |    |        |        |        |      |
| ATOM       | 434 | CB   | THR |   | 33 | 12.506 | -0.813 | 33.756 | 1.00 |
| 63.25      |     |      | C   |   |    |        |        |        |      |
| ATOM       | 435 | CG2  | THR |   | 33 | 13.403 | -1.798 | 33.006 |      |
| 1.00121.65 |     |      |     | C |    |        |        |        |      |
| ATOM       | 436 | OG1  | THR |   | 33 | 13.121 | 0.468  | 33.785 | 1.00 |
| 96.20      |     |      | O   |   |    |        |        |        |      |
| ATOM       | 437 | HN   | THR |   | 33 | 11.233 | 0.937  | 31.718 | 1.00 |
| 23.82      |     |      | H   |   |    |        |        |        |      |
| ATOM       | 438 | HA   | THR |   | 33 | 10.763 | -1.700 | 32.904 | 1.00 |
| 67.12      |     |      | H   |   |    |        |        |        |      |
| ATOM       | 439 | HB   | THR |   | 33 | 12.352 | -1.166 | 34.762 |      |
| 1.00107.59 |     |      |     | H |    |        |        |        |      |
| ATOM       | 440 | HG1  | THR |   | 33 | 13.674 | 0.550  | 33.005 |      |
| 1.00176.27 |     |      |     | H |    |        |        |        |      |
| ATOM       | 441 | HG21 | THR |   | 33 | 12.887 | -2.741 | 32.895 |      |
| 1.00255.23 |     |      |     | H |    |        |        |        |      |
| ATOM       | 442 | HG22 | THR |   | 33 | 14.316 | -1.949 | 33.563 |      |
| 1.00245.37 |     |      |     | H |    |        |        |        |      |
| ATOM       | 443 | HG23 | THR |   | 33 | 13.638 | -1.400 | 32.030 |      |
| 1.00185.78 |     |      |     | H |    |        |        |        |      |
| ATOM       | 444 | N    | GLY |   | 34 | 8.916  | -0.293 | 33.720 | 1.00 |
| 40.93      |     |      | N   |   |    |        |        |        |      |
| ATOM       | 445 | CA   | GLY |   | 34 | 7.862  | 0.305  | 34.502 | 1.00 |
| 45.59      |     |      | C   |   |    |        |        |        |      |
| ATOM       | 446 | C    | GLY |   | 34 | 7.554  | 1.714  | 34.015 | 1.00 |
| 40.97      |     |      | C   |   |    |        |        |        |      |
| ATOM       | 447 | O    | GLY |   | 34 | 6.610  | 2.352  | 34.479 | 1.00 |
| 82.17      |     |      | O   |   |    |        |        |        |      |
| ATOM       | 448 | HN   | GLY |   | 34 | 8.693  | -0.956 | 33.035 | 1.00 |
| 54.00      |     |      | H   |   |    |        |        |        |      |
| ATOM       | 449 | HA1  | GLY |   | 34 | 8.189  | 0.341  | 35.523 | 1.00 |
| 54.41      |     |      | H   |   |    |        |        |        |      |
| ATOM       | 450 | HA2  | GLY |   | 34 | 6.974  | -0.305 | 34.431 | 1.00 |
| 62.09      |     |      | H   |   |    |        |        |        |      |
| ATOM       | 451 | N    | ASN |   | 35 | 8.357  | 2.189  | 33.066 | 1.00 |
| 32.51      |     |      | N   |   |    |        |        |        |      |
| ATOM       | 452 | CA   | ASN |   | 35 | 8.171  | 3.523  | 32.504 | 1.00 |

|            |     |      |     |    |       |       |        |      |  |
|------------|-----|------|-----|----|-------|-------|--------|------|--|
| 33.20      |     |      | C   |    |       |       |        |      |  |
| ATOM       | 453 | C    | ASN | 35 | 8.779 | 3.597 | 31.108 | 1.00 |  |
| 23.17      |     |      | C   |    |       |       |        |      |  |
| ATOM       | 454 | O    | ASN | 35 | 9.761 | 2.917 | 30.812 | 1.00 |  |
| 27.01      |     |      | O   |    |       |       |        |      |  |
| ATOM       | 455 | CB   | ASN | 35 | 8.830 | 4.574 | 33.400 | 1.00 |  |
| 54.51      |     |      | C   |    |       |       |        |      |  |
| ATOM       | 456 | CG   | ASN | 35 | 8.222 | 4.529 | 34.798 | 1.00 |  |
| 80.73      |     |      | C   |    |       |       |        |      |  |
| ATOM       | 457 | ND2  | ASN | 35 | 9.002 | 4.389 | 35.834 |      |  |
| 1.00220.46 |     |      |     | N  |       |       |        |      |  |
| ATOM       | 458 | OD1  | ASN | 35 | 7.005 | 4.629 | 34.950 |      |  |
| 1.00117.80 |     |      |     | O  |       |       |        |      |  |
| ATOM       | 459 | HN   | ASN | 35 | 9.090 | 1.628 | 32.735 | 1.00 |  |
| 51.15      |     |      | H   |    |       |       |        |      |  |
| ATOM       | 460 | HA   | ASN | 35 | 7.114 | 3.734 | 32.437 | 1.00 |  |
| 47.21      |     |      | H   |    |       |       |        |      |  |
| ATOM       | 461 | HB1  | ASN | 35 | 8.674 | 5.553 | 32.973 | 1.00 |  |
| 68.31      |     |      | H   |    |       |       |        |      |  |
| ATOM       | 462 | HB2  | ASN | 35 | 9.890 | 4.374 | 33.463 | 1.00 |  |
| 57.75      |     |      | H   |    |       |       |        |      |  |
| ATOM       | 463 | HD21 | ASN | 35 | 9.971 | 4.311 | 35.711 |      |  |
| 1.00405.39 |     |      |     | H  |       |       |        |      |  |
| ATOM       | 464 | HD22 | ASN | 35 | 8.619 | 4.361 | 36.736 |      |  |
| 1.00245.64 |     |      |     | H  |       |       |        |      |  |
| ATOM       | 465 | N    | PHE | 36 | 8.189 | 4.426 | 30.251 | 1.00 |  |
| 35.72      |     |      | N   |    |       |       |        |      |  |
| ATOM       | 466 | CA   | PHE | 36 | 8.669 | 4.589 | 28.888 | 1.00 |  |
| 33.41      |     |      | C   |    |       |       |        |      |  |
| ATOM       | 467 | C    | PHE | 36 | 9.517 | 5.851 | 28.767 | 1.00 |  |
| 28.51      |     |      | C   |    |       |       |        |      |  |
| ATOM       | 468 | O    | PHE | 36 | 9.170 | 6.897 | 29.314 | 1.00 |  |
| 45.23      |     |      | O   |    |       |       |        |      |  |
| ATOM       | 469 | CB   | PHE | 36 | 7.467 | 4.688 | 27.959 | 1.00 |  |
| 67.53      |     |      | C   |    |       |       |        |      |  |
| ATOM       | 470 | CG   | PHE | 36 | 6.712 | 3.382 | 27.984 | 1.00 |  |
| 86.71      |     |      | C   |    |       |       |        |      |  |
| ATOM       | 471 | CD1  | PHE | 36 | 5.643 | 3.212 | 28.872 |      |  |
| 1.00106.51 |     |      |     | C  |       |       |        |      |  |
| ATOM       | 472 | CD2  | PHE | 36 | 7.080 | 2.342 | 27.125 | 1.00 |  |
| 99.48      |     |      | C   |    |       |       |        |      |  |
| ATOM       | 473 | CE1  | PHE | 36 | 4.941 | 2.002 | 28.898 |      |  |
| 1.00134.48 |     |      |     | C  |       |       |        |      |  |
| ATOM       | 474 | CE2  | PHE | 36 | 6.378 | 1.131 | 27.151 |      |  |
| 1.00134.27 |     |      |     | C  |       |       |        |      |  |
| ATOM       | 475 | CZ   | PHE | 36 | 5.309 | 0.961 | 28.037 |      |  |
| 1.00149.48 |     |      |     | C  |       |       |        |      |  |
| ATOM       | 476 | HN   | PHE | 36 | 7.409 | 4.940 | 30.538 | 1.00 |  |
| 62.87      |     |      | H   |    |       |       |        |      |  |
| ATOM       | 477 | HA   | PHE | 36 | 9.261 | 3.732 | 28.602 | 1.00 |  |
| 28.53      |     |      | H   |    |       |       |        |      |  |
| ATOM       | 478 | HB1  | PHE | 36 | 7.802 | 4.891 | 26.963 | 1.00 |  |

|            |     |      |     |    |        |       |        |      |
|------------|-----|------|-----|----|--------|-------|--------|------|
| 73.56      |     |      | H   |    |        |       |        |      |
| ATOM       | 479 | HB2  | PHE | 36 | 6.818  | 5.487 | 28.291 | 1.00 |
| 88.42      |     |      | H   |    |        |       |        |      |
| ATOM       | 480 | HD1  | PHE | 36 | 5.361  | 4.016 | 29.537 |      |
| 1.00110.20 |     |      | H   |    |        |       |        |      |
| ATOM       | 481 | HD2  | PHE | 36 | 7.909  | 2.471 | 26.443 | 1.00 |
| 93.07      |     |      | H   |    |        |       |        |      |
| ATOM       | 482 | HE1  | PHE | 36 | 4.115  | 1.871 | 29.582 |      |
| 1.00155.06 |     |      | H   |    |        |       |        |      |
| ATOM       | 483 | HE2  | PHE | 36 | 6.663  | 0.328 | 26.487 |      |
| 1.00159.46 |     |      | H   |    |        |       |        |      |
| ATOM       | 484 | HZ   | PHE | 36 | 4.767  | 0.027 | 28.056 |      |
| 1.00183.25 |     |      | H   |    |        |       |        |      |
| ATOM       | 485 | N    | THR | 37 | 10.630 | 5.746 | 28.043 | 1.00 |
| 20.06      |     |      | N   |    |        |       |        |      |
| ATOM       | 486 | CA   | THR | 37 | 11.522 | 6.884 | 27.857 | 1.00 |
| 27.18      |     |      | C   |    |        |       |        |      |
| ATOM       | 487 | C    | THR | 37 | 12.258 | 6.772 | 26.525 | 1.00 |
| 41.87      |     |      | C   |    |        |       |        |      |
| ATOM       | 488 | O    | THR | 37 | 13.001 | 5.818 | 26.292 |      |
| 1.00169.86 |     |      | O   |    |        |       |        |      |
| ATOM       | 489 | CB   | THR | 37 | 12.539 | 6.944 | 28.999 | 1.00 |
| 26.52      |     |      | C   |    |        |       |        |      |
| ATOM       | 490 | CG2  | THR | 37 | 11.811 | 7.193 | 30.321 | 1.00 |
| 75.69      |     |      | C   |    |        |       |        |      |
| ATOM       | 491 | OG1  | THR | 37 | 13.244 | 5.713 | 29.068 | 1.00 |
| 81.95      |     |      | O   |    |        |       |        |      |
| ATOM       | 492 | HN   | THR | 37 | 10.855 | 4.889 | 27.629 | 1.00 |
| 18.47      |     |      | H   |    |        |       |        |      |
| ATOM       | 493 | HA   | THR | 37 | 10.943 | 7.797 | 27.857 | 1.00 |
| 38.80      |     |      | H   |    |        |       |        |      |
| ATOM       | 494 | HB   | THR | 37 | 13.236 | 7.749 | 28.819 | 1.00 |
| 81.60      |     |      | H   |    |        |       |        |      |
| ATOM       | 495 | HG1  | THR | 37 | 14.049 | 5.803 | 28.553 |      |
| 1.00188.80 |     |      | H   |    |        |       |        |      |
| ATOM       | 496 | HG21 | THR | 37 | 11.095 | 7.991 | 30.193 |      |
| 1.00196.98 |     |      | H   |    |        |       |        |      |
| ATOM       | 497 | HG22 | THR | 37 | 12.528 | 7.472 | 31.079 |      |
| 1.00196.23 |     |      | H   |    |        |       |        |      |
| ATOM       | 498 | HG23 | THR | 37 | 11.298 | 6.293 | 30.625 |      |
| 1.00168.92 |     |      | H   |    |        |       |        |      |
| ATOM       | 499 | N    | GLU | 38 | 12.046 | 7.755 | 25.662 | 1.00 |
| 26.53      |     |      | N   |    |        |       |        |      |
| ATOM       | 500 | CA   | GLU | 38 | 12.694 | 7.769 | 24.355 | 1.00 |
| 30.29      |     |      | C   |    |        |       |        |      |
| ATOM       | 501 | C    | GLU | 38 | 14.161 | 8.155 | 24.494 | 1.00 |
| 25.39      |     |      | C   |    |        |       |        |      |
| ATOM       | 502 | O    | GLU | 38 | 14.569 | 8.724 | 25.509 | 1.00 |
| 51.60      |     |      | O   |    |        |       |        |      |
| ATOM       | 503 | CB   | GLU | 38 | 11.987 | 8.762 | 23.431 | 1.00 |
| 54.82      |     |      | C   |    |        |       |        |      |
| ATOM       | 504 | CG   | GLU | 38 | 10.581 | 8.251 | 23.114 |      |

|            |     |     |     |     |        |        |        |      |  |
|------------|-----|-----|-----|-----|--------|--------|--------|------|--|
| 1.00165.84 |     |     |     | C   |        |        |        |      |  |
| ATOM       | 505 | CD  | GLU | 38  | 9.836  | 9.270  | 22.257 |      |  |
| 1.00292.92 |     |     |     | C   |        |        |        |      |  |
| ATOM       | 506 | OE1 | GLU | 38  | 10.353 | 10.361 | 22.086 |      |  |
| 1.00414.19 |     |     |     | O   |        |        |        |      |  |
| ATOM       | 507 | OE2 | GLU | 38  | 8.758  | 8.943  | 21.786 |      |  |
| 1.00537.65 |     |     |     | O1- |        |        |        |      |  |
| ATOM       | 508 | HN  | GLU | 38  | 11.445 | 8.486  | 25.908 | 1.00 |  |
| 84.50      |     |     |     | H   |        |        |        |      |  |
| ATOM       | 509 | HA  | GLU | 38  | 12.631 | 6.782  | 23.921 | 1.00 |  |
| 32.15      |     |     |     | H   |        |        |        |      |  |
| ATOM       | 510 | HB1 | GLU | 38  | 12.547 | 8.861  | 22.513 |      |  |
| 1.00144.82 |     |     |     | H   |        |        |        |      |  |
| ATOM       | 511 | HB2 | GLU | 38  | 11.920 | 9.722  | 23.919 |      |  |
| 1.00106.49 |     |     |     | H   |        |        |        |      |  |
| ATOM       | 512 | HG1 | GLU | 38  | 10.040 | 8.093  | 24.034 |      |  |
| 1.00303.31 |     |     |     | H   |        |        |        |      |  |
| ATOM       | 513 | HG2 | GLU | 38  | 10.652 | 7.315  | 22.576 |      |  |
| 1.00323.99 |     |     |     | H   |        |        |        |      |  |
| ATOM       | 514 | N   | CYS | 39  | 14.952 | 7.850  | 23.472 | 1.00 |  |
| 15.84      |     |     |     | N   |        |        |        |      |  |
| ATOM       | 515 | CA  | CYS | 39  | 16.371 | 8.177  | 23.496 | 1.00 |  |
| 14.30      |     |     |     | C   |        |        |        |      |  |
| ATOM       | 516 | C   | CYS | 39  | 16.548 | 9.663  | 23.837 | 1.00 |  |
| 22.31      |     |     |     | C   |        |        |        |      |  |
| ATOM       | 517 | O   | CYS | 39  | 15.622 | 10.449 | 23.639 | 1.00 |  |
| 32.92      |     |     |     | O   |        |        |        |      |  |
| ATOM       | 518 | CB  | CYS | 39  | 16.993 | 7.864  | 22.129 | 1.00 |  |
| 18.08      |     |     |     | C   |        |        |        |      |  |
| ATOM       | 519 | SG  | CYS | 39  | 15.801 | 8.260  | 20.825 | 1.00 |  |
| 17.41      |     |     |     | S   |        |        |        |      |  |
| ATOM       | 520 | HN  | CYS | 39  | 14.573 | 7.402  | 22.687 | 1.00 |  |
| 24.87      |     |     |     | H   |        |        |        |      |  |
| ATOM       | 521 | HA  | CYS | 39  | 16.845 | 7.569  | 24.246 | 1.00 |  |
| 14.60      |     |     |     | H   |        |        |        |      |  |
| ATOM       | 522 | HB1 | CYS | 39  | 17.243 | 6.813  | 22.077 | 1.00 |  |
| 27.71      |     |     |     | H   |        |        |        |      |  |
| ATOM       | 523 | HB2 | CYS | 39  | 17.888 | 8.452  | 21.990 | 1.00 |  |
| 34.91      |     |     |     | H   |        |        |        |      |  |
| ATOM       | 524 | N   | PRO | 40  | 17.692 | 10.080 | 24.344 | 1.00 |  |
| 27.27      |     |     |     | N   |        |        |        |      |  |
| ATOM       | 525 | CA  | PRO | 40  | 17.915 | 11.514 | 24.697 | 1.00 |  |
| 47.66      |     |     |     | C   |        |        |        |      |  |
| ATOM       | 526 | C   | PRO | 40  | 17.669 | 12.452 | 23.525 | 1.00 |  |
| 71.54      |     |     |     | C   |        |        |        |      |  |
| ATOM       | 527 | O   | PRO | 40  | 17.643 | 12.039 | 22.365 | 1.00 |  |
| 87.70      |     |     |     | O   |        |        |        |      |  |
| ATOM       | 528 | CB  | PRO | 40  | 19.385 | 11.582 | 25.136 | 1.00 |  |
| 53.85      |     |     |     | C   |        |        |        |      |  |
| ATOM       | 529 | CG  | PRO | 40  | 19.739 | 10.191 | 25.520 | 1.00 |  |
| 46.04      |     |     |     | C   |        |        |        |      |  |
| ATOM       | 530 | CD  | PRO | 40  | 18.890 | 9.266  | 24.640 | 1.00 |  |

|            |     |     |     |    |        |        |        |      |   |
|------------|-----|-----|-----|----|--------|--------|--------|------|---|
| 25.70      |     |     |     |    |        |        |        |      |   |
| ATOM       | 531 | HA  | PRO | 40 | 17.280 | 11.789 | 25.526 | 1.00 |   |
| 58.04      |     |     |     |    |        |        |        |      |   |
| ATOM       | 532 | HB1 | PRO | 40 | 19.497 | 12.244 | 25.985 | 1.00 |   |
| 67.93      |     |     |     |    |        |        |        |      |   |
| ATOM       | 533 | HB2 | PRO | 40 | 20.012 | 11.919 | 24.316 | 1.00 |   |
| 70.99      |     |     |     |    |        |        |        |      |   |
| ATOM       | 534 | HG1 | PRO | 40 | 19.509 | 10.016 | 26.562 | 1.00 |   |
| 65.91      |     |     |     |    |        |        |        |      |   |
| ATOM       | 535 | HG2 | PRO | 40 | 20.788 | 10.024 | 25.340 | 1.00 |   |
| 54.99      |     |     |     |    |        |        |        |      |   |
| ATOM       | 536 | HD1 | PRO | 40 | 18.625 | 8.380  | 25.188 | 1.00 |   |
| 24.22      |     |     |     |    |        |        |        |      |   |
| ATOM       | 537 | HD2 | PRO | 40 | 19.421 | 9.015  | 23.731 | 1.00 |   |
| 26.94      |     |     |     |    |        |        |        |      |   |
| ATOM       | 538 | N   | GLY | 41 | 17.508 | 13.721 | 23.854 |      |   |
| 1.00105.24 |     |     |     |    |        |        |        |      | N |
| ATOM       | 539 | CA  | GLY | 41 | 17.283 | 14.746 | 22.842 |      |   |
| 1.00147.55 |     |     |     |    |        |        |        |      | C |
| ATOM       | 540 | C   | GLY | 41 | 18.551 | 14.987 | 22.037 |      |   |
| 1.00161.74 |     |     |     |    |        |        |        |      | C |
| ATOM       | 541 | O   | GLY | 41 | 18.510 | 15.155 | 20.818 |      |   |
| 1.00244.37 |     |     |     |    |        |        |        |      | O |
| ATOM       | 542 | HN  | GLY | 41 | 17.565 | 13.972 | 24.798 |      |   |
| 1.00121.79 |     |     |     |    |        |        |        |      | H |
| ATOM       | 543 | HA1 | GLY | 41 | 16.989 | 15.665 | 23.324 |      |   |
| 1.00184.40 |     |     |     |    |        |        |        |      | H |
| ATOM       | 544 | HA2 | GLY | 41 | 16.495 | 14.422 | 22.178 |      |   |
| 1.00157.34 |     |     |     |    |        |        |        |      | H |
| ATOM       | 545 | N   | LEU | 42 | 19.682 | 14.999 | 22.739 |      |   |
| 1.00162.48 |     |     |     |    |        |        |        |      | N |
| ATOM       | 546 | CA  | LEU | 42 | 20.988 | 15.218 | 22.115 |      |   |
| 1.00191.48 |     |     |     |    |        |        |        |      | C |
| ATOM       | 547 | C   | LEU | 42 | 21.914 | 14.043 | 22.415 |      |   |
| 1.00166.66 |     |     |     |    |        |        |        |      | C |
| ATOM       | 548 | O   | LEU | 42 | 21.700 | 13.306 | 23.376 |      |   |
| 1.00251.38 |     |     |     |    |        |        |        |      | O |
| ATOM       | 549 | CB  | LEU | 42 | 21.613 | 16.506 | 22.655 |      |   |
| 1.00307.99 |     |     |     |    |        |        |        |      | C |
| ATOM       | 550 | CG  | LEU | 42 | 20.652 | 17.683 | 22.450 |      |   |
| 1.00452.28 |     |     |     |    |        |        |        |      | C |
| ATOM       | 551 | CD1 | LEU | 42 | 21.270 | 18.947 | 23.054 |      |   |
| 1.00681.24 |     |     |     |    |        |        |        |      | C |
| ATOM       | 552 | CD2 | LEU | 42 | 20.396 | 17.900 | 20.950 |      |   |
| 1.00527.46 |     |     |     |    |        |        |        |      | C |
| ATOM       | 553 | HN  | LEU | 42 | 19.637 | 14.856 | 23.707 |      |   |
| 1.00195.47 |     |     |     |    |        |        |        |      | H |
| ATOM       | 554 | HA  | LEU | 42 | 20.873 | 15.306 | 21.043 |      |   |
| 1.00229.77 |     |     |     |    |        |        |        |      | H |
| ATOM       | 555 | HB1 | LEU | 42 | 22.536 | 16.704 | 22.132 |      |   |
| 1.00342.49 |     |     |     |    |        |        |        |      | H |
| ATOM       | 556 | HB2 | LEU | 42 | 21.818 | 16.389 | 23.709 |      |   |

|            |     |      |     |    |        |        |        |  |
|------------|-----|------|-----|----|--------|--------|--------|--|
| 1.00335.33 |     |      |     | H  |        |        |        |  |
| ATOM       | 557 | HG   | LEU | 42 | 19.717 | 17.469 | 22.949 |  |
| 1.00427.79 |     |      |     | H  |        |        |        |  |
| ATOM       | 558 | HD11 | LEU | 42 | 22.280 | 19.064 | 22.690 |  |
| 1.00909.71 |     |      |     | H  |        |        |        |  |
| ATOM       | 559 | HD12 | LEU | 42 | 21.283 | 18.863 | 24.131 |  |
| 1.00706.80 |     |      |     | H  |        |        |        |  |
| ATOM       | 560 | HD13 | LEU | 42 | 20.682 | 19.807 | 22.768 |  |
| 1.00858.82 |     |      |     | H  |        |        |        |  |
| ATOM       | 561 | HD21 | LEU | 42 | 21.307 | 17.726 | 20.395 |  |
| 1.00631.69 |     |      |     | H  |        |        |        |  |
| ATOM       | 562 | HD22 | LEU | 42 | 20.061 | 18.914 | 20.780 |  |
| 1.00628.06 |     |      |     | H  |        |        |        |  |
| ATOM       | 563 | HD23 | LEU | 42 | 19.633 | 17.216 | 20.611 |  |
| 1.00656.75 |     |      |     | H  |        |        |        |  |
| ATOM       | 564 | N    | THR | 43 | 22.938 | 13.871 | 21.587 |  |
| 1.00178.52 |     |      |     | N  |        |        |        |  |
| ATOM       | 565 | CA   | THR | 43 | 23.882 | 12.778 | 21.780 |  |
| 1.00240.84 |     |      |     | C  |        |        |        |  |
| ATOM       | 566 | C    | THR | 43 | 24.591 | 12.921 | 23.137 |  |
| 1.00372.31 |     |      |     | C  |        |        |        |  |
| ATOM       | 567 | O    | THR | 43 | 24.795 | 14.038 | 23.613 |  |
| 1.00500.13 |     |      |     | O  |        |        |        |  |
| ATOM       | 568 | CB   | THR | 43 | 24.906 | 12.785 | 20.642 |  |
| 1.00354.13 |     |      |     | C  |        |        |        |  |
| ATOM       | 569 | CG2  | THR | 43 | 24.194 | 12.552 | 19.306 |  |
| 1.00463.04 |     |      |     | C  |        |        |        |  |
| ATOM       | 570 | OG1  | THR | 43 | 25.563 | 14.043 | 20.611 |  |
| 1.00508.50 |     |      |     | O  |        |        |        |  |
| ATOM       | 571 | HN   | THR | 43 | 23.060 | 14.488 | 20.834 |  |
| 1.00229.59 |     |      |     | H  |        |        |        |  |
| ATOM       | 572 | HA   | THR | 43 | 23.335 | 11.851 | 21.754 |  |
| 1.00249.90 |     |      |     | H  |        |        |        |  |
| ATOM       | 573 | HB   | THR | 43 | 25.630 | 12.002 | 20.800 |  |
| 1.00481.58 |     |      |     | H  |        |        |        |  |
| ATOM       | 574 | HG1  | THR | 43 | 26.395 | 13.931 | 20.146 |  |
| 1.00624.31 |     |      |     | H  |        |        |        |  |
| ATOM       | 575 | HG21 | THR | 43 | 23.708 | 13.463 | 18.992 |  |
| 1.00650.95 |     |      |     | H  |        |        |        |  |
| ATOM       | 576 | HG22 | THR | 43 | 23.454 | 11.772 | 19.419 |  |
| 1.00580.73 |     |      |     | H  |        |        |        |  |
| ATOM       | 577 | HG23 | THR | 43 | 24.917 | 12.256 | 18.560 |  |
| 1.00571.99 |     |      |     | H  |        |        |        |  |
| ATOM       | 578 | N    | PRO | 44 | 24.956 | 11.826 | 23.778 |  |
| 1.00488.39 |     |      |     | N  |        |        |        |  |
| ATOM       | 579 | CA   | PRO | 44 | 25.635 | 11.863 | 25.114 |  |
| 1.00760.13 |     |      |     | C  |        |        |        |  |
| ATOM       | 580 | C    | PRO | 44 | 27.104 | 12.285 | 25.031 |  |
| 1.00735.36 |     |      |     | C  |        |        |        |  |
| ATOM       | 581 | O    | PRO | 44 | 27.710 | 12.639 | 26.042 |  |
| 1.00999.99 |     |      |     | O  |        |        |        |  |
| ATOM       | 582 | CB   | PRO | 44 | 25.505 | 10.417 | 25.608 |  |

|            |     |      |     |    |        |        |        |  |
|------------|-----|------|-----|----|--------|--------|--------|--|
| 1.00999.99 |     |      |     | C  |        |        |        |  |
| ATOM       | 583 | CG   | PRO | 44 | 25.507 | 9.599  | 24.361 |  |
| 1.00856.94 |     |      |     | C  |        |        |        |  |
| ATOM       | 584 | CD   | PRO | 44 | 24.768 | 10.436 | 23.312 |  |
| 1.00548.09 |     |      |     | C  |        |        |        |  |
| ATOM       | 585 | HA   | PRO | 44 | 25.101 | 12.519 | 25.782 |  |
| 1.00939.00 |     |      |     | H  |        |        |        |  |
| ATOM       | 586 | HB1  | PRO | 44 | 24.571 | 10.282 | 26.137 |  |
| 1.00999.99 |     |      |     | H  |        |        |        |  |
| ATOM       | 587 | HB2  | PRO | 44 | 26.341 | 10.151 | 26.244 |  |
| 1.00999.99 |     |      |     | H  |        |        |        |  |
| ATOM       | 588 | HG1  | PRO | 44 | 24.987 | 8.667  | 24.520 |  |
| 1.00999.99 |     |      |     | H  |        |        |        |  |
| ATOM       | 589 | HG2  | PRO | 44 | 26.526 | 9.410  | 24.044 |  |
| 1.00853.53 |     |      |     | H  |        |        |        |  |
| ATOM       | 590 | HD1  | PRO | 44 | 23.719 | 10.185 | 23.300 |  |
| 1.00602.45 |     |      |     | H  |        |        |        |  |
| ATOM       | 591 | HD2  | PRO | 44 | 25.210 | 10.294 | 22.335 |  |
| 1.00463.32 |     |      |     | H  |        |        |        |  |
| ATOM       | 592 | N    | ILE | 45 | 27.677 | 12.234 | 23.833 |  |
| 1.00518.33 |     |      |     | N  |        |        |        |  |
| ATOM       | 593 | CA   | ILE | 45 | 29.074 | 12.597 | 23.651 |  |
| 1.00582.79 |     |      |     | C  |        |        |        |  |
| ATOM       | 594 | C    | ILE | 45 | 29.415 | 13.867 | 24.429 |  |
| 1.00795.93 |     |      |     | C  |        |        |        |  |
| ATOM       | 595 | O    | ILE | 45 | 28.546 | 14.698 | 24.692 |  |
| 1.00898.75 |     |      |     | O  |        |        |        |  |
| ATOM       | 596 | CB   | ILE | 45 | 29.358 | 12.798 | 22.159 |  |
| 1.00474.41 |     |      |     | C  |        |        |        |  |
| ATOM       | 597 | CG1  | ILE | 45 | 28.593 | 14.019 | 21.636 |  |
| 1.00516.90 |     |      |     | C  |        |        |        |  |
| ATOM       | 598 | CG2  | ILE | 45 | 28.915 | 11.552 | 21.390 |  |
| 1.00760.75 |     |      |     | C  |        |        |        |  |
| ATOM       | 599 | CD1  | ILE | 45 | 28.846 | 14.175 | 20.135 |  |
| 1.00566.81 |     |      |     | C  |        |        |        |  |
| ATOM       | 600 | HN   | ILE | 45 | 27.158 | 11.935 | 23.059 |  |
| 1.00395.72 |     |      |     | H  |        |        |        |  |
| ATOM       | 601 | HA   | ILE | 45 | 29.691 | 11.792 | 24.014 |  |
| 1.00711.06 |     |      |     | H  |        |        |        |  |
| ATOM       | 602 | HB   | ILE | 45 | 30.413 | 12.944 | 22.020 |  |
| 1.00477.81 |     |      |     | H  |        |        |        |  |
| ATOM       | 603 | HG11 | ILE | 45 | 28.933 | 14.908 | 22.144 |  |
| 1.00624.28 |     |      |     | H  |        |        |        |  |
| ATOM       | 604 | HG12 | ILE | 45 | 27.539 | 13.883 | 21.815 |  |
| 1.00744.84 |     |      |     | H  |        |        |        |  |
| ATOM       | 605 | HG21 | ILE | 45 | 27.838 | 11.489 | 21.398 |  |
| 1.00920.57 |     |      |     | H  |        |        |        |  |
| ATOM       | 606 | HG22 | ILE | 45 | 29.331 | 10.673 | 21.858 |  |
| 1.00999.99 |     |      |     | H  |        |        |        |  |
| ATOM       | 607 | HG23 | ILE | 45 | 29.265 | 11.614 | 20.370 |  |
| 1.00865.46 |     |      |     | H  |        |        |        |  |
| ATOM       | 608 | HD11 | ILE | 45 | 29.902 | 14.065 | 19.935 |  |



|            |     |      |     |   |    |        |               |
|------------|-----|------|-----|---|----|--------|---------------|
| 1.00658.89 |     |      |     | H |    |        |               |
| ATOM       | 609 | HD12 | ILE |   | 45 | 28.518 | 15.152 19.814 |
| 1.00734.30 |     |      |     | H |    |        |               |
| ATOM       | 610 | HD13 | ILE |   | 45 | 28.298 | 13.415 19.596 |
| 1.00675.84 |     |      |     | H |    |        |               |
| ATOM       | 611 | N    | ALA |   | 46 | 30.686 | 14.007 24.794 |
| 1.00999.99 |     |      |     | N |    |        |               |
| ATOM       | 612 | CA   | ALA |   | 46 | 31.130 | 15.179 25.541 |
| 1.00999.99 |     |      |     | C |    |        |               |
| ATOM       | 613 | C    | ALA |   | 46 | 32.649 | 15.180 25.683 |
| 1.00999.99 |     |      |     | C |    |        |               |
| ATOM       | 614 | CB   | ALA |   | 46 | 30.485 | 15.192 26.928 |
| 1.00999.99 |     |      |     | C |    |        |               |
| ATOM       | 615 | OT1  | ALA |   | 46 | 33.319 | 15.089 24.667 |
| 1.00999.99 |     |      |     | O |    |        |               |
| ATOM       | 616 | OT2  | ALA |   | 46 | 33.120 | 15.271 26.805 |
| 1.00999.99 |     |      |     | O |    |        |               |
| ATOM       | 617 | HN   | ALA |   | 46 | 31.334 | 13.312 24.556 |
| 1.00999.99 |     |      |     | H |    |        |               |
| ATOM       | 618 | HA   | ALA |   | 46 | 30.828 | 16.068 25.010 |
| 1.00999.99 |     |      |     | H |    |        |               |
| ATOM       | 619 | HB1  | ALA |   | 46 | 30.960 | 15.946 27.538 |
| 1.00999.99 |     |      |     | H |    |        |               |
| ATOM       | 620 | HB2  | ALA |   | 46 | 30.609 | 14.224 27.392 |
| 1.00999.99 |     |      |     | H |    |        |               |
| ATOM       | 621 | HB3  | ALA |   | 46 | 29.434 | 15.414 26.834 |
| 1.00999.99 |     |      |     | H |    |        |               |
| ENDMDL     |     |      |     |   |    |        |               |
| TER        |     |      |     |   |    |        |               |
| MODEL      |     | 9    |     |   |    |        |               |
| ATOM       | 1   | N    | GLY |   | 1  | 24.545 | -4.470 18.883 |
| 1.00999.99 |     |      |     | N |    |        |               |
| ATOM       | 2   | CA   | GLY |   | 1  | 24.924 | -3.104 19.343 |
| 1.00999.99 |     |      |     | C |    |        |               |
| ATOM       | 3   | C    | GLY |   | 1  | 24.376 | -2.066 18.367 |
| 1.00999.99 |     |      |     | C |    |        |               |
| ATOM       | 4   | O    | GLY |   | 1  | 23.873 | -1.021 18.776 |
| 1.00999.99 |     |      |     | O |    |        |               |
| ATOM       | 5   | HA1  | GLY |   | 1  | 25.999 | -3.022 19.383 |
| 1.00999.99 |     |      |     | H |    |        |               |
| ATOM       | 6   | HA2  | GLY |   | 1  | 24.512 | -2.927 20.325 |
| 1.00999.99 |     |      |     | H |    |        |               |
| ATOM       | 7   | HT1  | GLY |   | 1  | 24.693 | -4.544 17.857 |
| 1.00999.99 |     |      |     | H |    |        |               |
| ATOM       | 8   | HT2  | GLY |   | 1  | 23.542 | -4.643 19.103 |
| 1.00999.99 |     |      |     | H |    |        |               |
| ATOM       | 9   | HT3  | GLY |   | 1  | 25.134 | -5.175 19.369 |
| 1.00999.99 |     |      |     | H |    |        |               |
| ATOM       | 10  | N    | LEU |   | 2  | 24.477 | -2.366 17.077 |
| 1.00999.99 |     |      |     | N |    |        |               |
| ATOM       | 11  | CA   | LEU |   | 2  | 23.990 | -1.450 16.052 |
| 1.00895.59 |     |      |     | C |    |        |               |

|            |    |      |     |   |        |        |        |      |
|------------|----|------|-----|---|--------|--------|--------|------|
| ATOM       | 12 | C    | LEU | 2 | 22.466 | -1.406 | 16.060 |      |
| 1.00532.27 |    |      | C   |   |        |        |        |      |
| ATOM       | 13 | O    | LEU | 2 | 21.808 | -2.400 | 16.368 |      |
| 1.00625.21 |    |      | O   |   |        |        |        |      |
| ATOM       | 14 | CB   | LEU | 2 | 24.476 | -1.902 | 14.671 |      |
| 1.00999.99 |    |      | C   |   |        |        |        |      |
| ATOM       | 15 | CG   | LEU | 2 | 26.008 | -1.956 | 14.645 |      |
| 1.00999.99 |    |      | C   |   |        |        |        |      |
| ATOM       | 16 | CD1  | LEU | 2 | 26.465 | -2.490 | 13.283 |      |
| 1.00999.99 |    |      | C   |   |        |        |        |      |
| ATOM       | 17 | CD2  | LEU | 2 | 26.595 | -0.551 | 14.872 |      |
| 1.00999.99 |    |      | C   |   |        |        |        |      |
| ATOM       | 18 | HN   | LEU | 2 | 24.887 | -3.214 | 16.809 |      |
| 1.00999.99 |    |      | H   |   |        |        |        |      |
| ATOM       | 19 | HA   | LEU | 2 | 24.367 | -0.461 | 16.252 |      |
| 1.00890.87 |    |      | H   |   |        |        |        |      |
| ATOM       | 20 | HB1  | LEU | 2 | 24.132 | -1.202 | 13.925 |      |
| 1.00924.07 |    |      | H   |   |        |        |        |      |
| ATOM       | 21 | HB2  | LEU | 2 | 24.077 | -2.882 | 14.455 |      |
| 1.00999.99 |    |      | H   |   |        |        |        |      |
| ATOM       | 22 | HG   | LEU | 2 | 26.355 | -2.622 | 15.423 |      |
| 1.00999.99 |    |      | H   |   |        |        |        |      |
| ATOM       | 23 | HD11 | LEU | 2 | 27.544 | -2.494 | 13.241 |      |
| 1.00999.99 |    |      | H   |   |        |        |        |      |
| ATOM       | 24 | HD12 | LEU | 2 | 26.077 | -1.856 | 12.500 |      |
| 1.00999.99 |    |      | H   |   |        |        |        |      |
| ATOM       | 25 | HD13 | LEU | 2 | 26.095 | -3.496 | 13.149 |      |
| 1.00999.99 |    |      | H   |   |        |        |        |      |
| ATOM       | 26 | HD21 | LEU | 2 | 26.655 | -0.354 | 15.933 |      |
| 1.00999.99 |    |      | H   |   |        |        |        |      |
| ATOM       | 27 | HD22 | LEU | 2 | 25.963 | 0.190  | 14.404 |      |
| 1.00999.99 |    |      | H   |   |        |        |        |      |
| ATOM       | 28 | HD23 | LEU | 2 | 27.587 | -0.496 | 14.446 |      |
| 1.00999.99 |    |      | H   |   |        |        |        |      |
| ATOM       | 29 | N    | CYS | 3 | 21.907 | -0.247 | 15.721 |      |
| 1.00271.28 |    |      | N   |   |        |        |        |      |
| ATOM       | 30 | CA   | CYS | 3 | 20.456 | -0.085 | 15.694 |      |
| 1.00104.50 |    |      | C   |   |        |        |        |      |
| ATOM       | 31 | C    | CYS | 3 | 19.894 | -0.550 | 14.354 | 1.00 |
| 90.98      |    |      | C   |   |        |        |        |      |
| ATOM       | 32 | O    | CYS | 3 | 20.072 | 0.114  | 13.332 |      |
| 1.00207.28 |    |      | O   |   |        |        |        |      |
| ATOM       | 33 | CB   | CYS | 3 | 20.087 | 1.383  | 15.914 | 1.00 |
| 37.83      |    |      | C   |   |        |        |        |      |
| ATOM       | 34 | SG   | CYS | 3 | 20.711 | 1.936  | 17.521 | 1.00 |
| 81.56      |    |      | S   |   |        |        |        |      |
| ATOM       | 35 | HN   | CYS | 3 | 22.480 | 0.513  | 15.486 |      |
| 1.00296.55 |    |      | H   |   |        |        |        |      |
| ATOM       | 36 | HA   | CYS | 3 | 20.018 | -0.675 | 16.484 |      |
| 1.00166.45 |    |      | H   |   |        |        |        |      |
| ATOM       | 37 | HB1  | CYS | 3 | 19.013 | 1.492  | 15.889 | 1.00 |
| 40.38      |    |      | H   |   |        |        |        |      |

|            |    |     |     |   |        |        |        |      |
|------------|----|-----|-----|---|--------|--------|--------|------|
| ATOM       | 38 | HB2 | CYS | 3 | 20.528 | 1.986  | 15.132 | 1.00 |
| 98.45      |    |     | H   |   |        |        |        |      |
| ATOM       | 39 | N   | SER | 4 | 19.211 | -1.688 | 14.367 | 1.00 |
| 85.31      |    |     | N   |   |        |        |        |      |
| ATOM       | 40 | CA  | SER | 4 | 18.621 | -2.229 | 13.147 | 1.00 |
| 92.94      |    |     | C   |   |        |        |        |      |
| ATOM       | 41 | C   | SER | 4 | 17.600 | -1.253 | 12.594 | 1.00 |
| 67.37      |    |     | C   |   |        |        |        |      |
| ATOM       | 42 | O   | SER | 4 | 17.524 | -1.017 | 11.389 |      |
| 1.00102.28 |    |     | O   |   |        |        |        |      |
| ATOM       | 43 | CB  | SER | 4 | 17.906 | -3.543 | 13.446 |      |
| 1.00123.83 |    |     | C   |   |        |        |        |      |
| ATOM       | 44 | OG  | SER | 4 | 17.445 | -4.114 | 12.228 |      |
| 1.00178.89 |    |     | O   |   |        |        |        |      |
| ATOM       | 45 | HN  | SER | 4 | 19.097 | -2.174 | 15.212 |      |
| 1.00163.03 |    |     | H   |   |        |        |        |      |
| ATOM       | 46 | HA  | SER | 4 | 19.393 | -2.400 | 12.414 |      |
| 1.00129.78 |    |     | H   |   |        |        |        |      |
| ATOM       | 47 | HB1 | SER | 4 | 17.060 | -3.342 | 14.098 |      |
| 1.00105.26 |    |     | H   |   |        |        |        |      |
| ATOM       | 48 | HB2 | SER | 4 | 18.583 | -4.228 | 13.931 |      |
| 1.00156.87 |    |     | H   |   |        |        |        |      |
| ATOM       | 49 | HG  | SER | 4 | 17.558 | -5.066 | 12.286 |      |
| 1.00218.16 |    |     | H   |   |        |        |        |      |
| ATOM       | 50 | N   | GLU | 5 | 16.801 | -0.706 | 13.501 | 1.00 |
| 41.67      |    |     | N   |   |        |        |        |      |
| ATOM       | 51 | CA  | GLU | 5 | 15.750 | 0.232  | 13.143 | 1.00 |
| 41.21      |    |     | C   |   |        |        |        |      |
| ATOM       | 52 | C   | GLU | 5 | 15.610 | 1.304  | 14.218 | 1.00 |
| 41.92      |    |     | C   |   |        |        |        |      |
| ATOM       | 53 | O   | GLU | 5 | 16.473 | 1.437  | 15.085 | 1.00 |
| 74.72      |    |     | O   |   |        |        |        |      |
| ATOM       | 54 | CB  | GLU | 5 | 14.434 | -0.523 | 12.988 | 1.00 |
| 49.24      |    |     | C   |   |        |        |        |      |
| ATOM       | 55 | CG  | GLU | 5 | 14.123 | -1.251 | 14.288 | 1.00 |
| 55.48      |    |     | C   |   |        |        |        |      |
| ATOM       | 56 | CD  | GLU | 5 | 12.952 | -2.208 | 14.089 | 1.00 |
| 92.06      |    |     | C   |   |        |        |        |      |
| ATOM       | 57 | OE1 | GLU | 5 | 12.589 | -2.877 | 15.044 |      |
| 1.00206.49 |    |     | O   |   |        |        |        |      |
| ATOM       | 58 | OE2 | GLU | 5 | 12.432 | -2.256 | 12.987 |      |
| 1.00197.24 |    |     | O1- |   |        |        |        |      |
| ATOM       | 59 | HN  | GLU | 5 | 16.912 | -0.955 | 14.443 | 1.00 |
| 45.52      |    |     | H   |   |        |        |        |      |
| ATOM       | 60 | HA  | GLU | 5 | 15.991 | 0.702  | 12.208 | 1.00 |
| 60.63      |    |     | H   |   |        |        |        |      |
| ATOM       | 61 | HB1 | GLU | 5 | 14.522 | -1.243 | 12.187 | 1.00 |
| 61.59      |    |     | H   |   |        |        |        |      |
| ATOM       | 62 | HB2 | GLU | 5 | 13.644 | 0.169  | 12.764 | 1.00 |
| 63.66      |    |     | H   |   |        |        |        |      |
| ATOM       | 63 | HG1 | GLU | 5 | 13.872 | -0.531 | 15.052 | 1.00 |
| 58.03      |    |     | H   |   |        |        |        |      |

|            |    |      |     |   |        |        |        |      |
|------------|----|------|-----|---|--------|--------|--------|------|
| ATOM       | 64 | HG2  | GLU | 5 | 14.994 | -1.806 | 14.593 | 1.00 |
| 57.77      |    |      | H   |   |        |        |        |      |
| ATOM       | 65 | N    | ASN | 6 | 14.523 | 2.064  | 14.162 | 1.00 |
| 50.73      |    |      | N   |   |        |        |        |      |
| ATOM       | 66 | CA   | ASN | 6 | 14.296 | 3.115  | 15.144 | 1.00 |
| 71.04      |    |      | C   |   |        |        |        |      |
| ATOM       | 67 | C    | ASN | 6 | 14.227 | 2.514  | 16.545 | 1.00 |
| 65.17      |    |      | C   |   |        |        |        |      |
| ATOM       | 68 | O    | ASN | 6 | 14.748 | 3.086  | 17.504 | 1.00 |
| 94.86      |    |      | O   |   |        |        |        |      |
| ATOM       | 69 | CB   | ASN | 6 | 12.991 | 3.852  | 14.836 | 1.00 |
| 94.83      |    |      | C   |   |        |        |        |      |
| ATOM       | 70 | CG   | ASN | 6 | 13.161 | 4.709  | 13.586 |      |
| 1.00160.94 |    |      | C   |   |        |        |        |      |
| ATOM       | 71 | ND2  | ASN | 6 | 12.105 | 5.107  | 12.930 |      |
| 1.00244.88 |    |      | N   |   |        |        |        |      |
| ATOM       | 72 | OD1  | ASN | 6 | 14.285 | 5.027  | 13.198 |      |
| 1.00219.73 |    |      | O   |   |        |        |        |      |
| ATOM       | 73 | HN   | ASN | 6 | 13.864 | 1.916  | 13.451 | 1.00 |
| 72.81      |    |      | H   |   |        |        |        |      |
| ATOM       | 74 | HA   | ASN | 6 | 15.114 | 3.818  | 15.103 | 1.00 |
| 96.02      |    |      | H   |   |        |        |        |      |
| ATOM       | 75 | HB1  | ASN | 6 | 12.731 | 4.485  | 15.671 |      |
| 1.00111.09 |    |      | H   |   |        |        |        |      |
| ATOM       | 76 | HB2  | ASN | 6 | 12.204 | 3.131  | 14.672 | 1.00 |
| 98.13      |    |      | H   |   |        |        |        |      |
| ATOM       | 77 | HD21 | ASN | 6 | 11.211 | 4.853  | 13.241 |      |
| 1.00272.43 |    |      | H   |   |        |        |        |      |
| ATOM       | 78 | HD22 | ASN | 6 | 12.207 | 5.659  | 12.127 |      |
| 1.00336.78 |    |      | H   |   |        |        |        |      |
| ATOM       | 79 | N    | GLY | 7 | 13.587 | 1.351  | 16.651 | 1.00 |
| 51.80      |    |      | N   |   |        |        |        |      |
| ATOM       | 80 | CA   | GLY | 7 | 13.454 | 0.656  | 17.936 | 1.00 |
| 71.47      |    |      | C   |   |        |        |        |      |
| ATOM       | 81 | C    | GLY | 7 | 14.106 | -0.719 | 17.874 | 1.00 |
| 41.04      |    |      | C   |   |        |        |        |      |
| ATOM       | 82 | O    | GLY | 7 | 13.441 | -1.744 | 18.028 | 1.00 |
| 44.54      |    |      | O   |   |        |        |        |      |
| ATOM       | 83 | HN   | GLY | 7 | 13.200 | 0.945  | 15.849 | 1.00 |
| 45.49      |    |      | H   |   |        |        |        |      |
| ATOM       | 84 | HA1  | GLY | 7 | 12.412 | 0.535  | 18.164 |      |
| 1.00103.52 |    |      | H   |   |        |        |        |      |
| ATOM       | 85 | HA2  | GLY | 7 | 13.925 | 1.236  | 18.719 |      |
| 1.00108.67 |    |      | H   |   |        |        |        |      |
| ATOM       | 86 | N    | ASP | 8 | 15.411 | -0.730 | 17.642 | 1.00 |
| 27.00      |    |      | N   |   |        |        |        |      |
| ATOM       | 87 | CA   | ASP | 8 | 16.153 | -1.984 | 17.553 | 1.00 |
| 14.15      |    |      | C   |   |        |        |        |      |
| ATOM       | 88 | C    | ASP | 8 | 16.054 | -2.757 | 18.862 | 1.00 |
| 9.37       |    |      | C   |   |        |        |        |      |
| ATOM       | 89 | O    | ASP | 8 | 15.843 | -3.970 | 18.864 | 1.00 |
| 14.61      |    |      | O   |   |        |        |        |      |

|            |     |     |     |    |        |        |        |      |
|------------|-----|-----|-----|----|--------|--------|--------|------|
| ATOM       | 90  | CB  | ASP | 8  | 17.623 | -1.705 | 17.233 | 1.00 |
| 15.06      |     |     | C   |    |        |        |        |      |
| ATOM       | 91  | CG  | ASP | 8  | 18.374 | -3.021 | 17.055 | 1.00 |
| 21.22      |     |     | C   |    |        |        |        |      |
| ATOM       | 92  | OD1 | ASP | 8  | 17.791 | -4.056 | 17.335 |      |
| 1.00119.56 |     |     | O   |    |        |        |        |      |
| ATOM       | 93  | OD2 | ASP | 8  | 19.520 | -2.974 | 16.643 |      |
| 1.00133.27 |     |     | O1- |    |        |        |        |      |
| ATOM       | 94  | HN  | ASP | 8  | 15.881 | 0.120  | 17.524 | 1.00 |
| 35.63      |     |     | H   |    |        |        |        |      |
| ATOM       | 95  | HA  | ASP | 8  | 15.733 | -2.583 | 16.765 | 1.00 |
| 20.92      |     |     | H   |    |        |        |        |      |
| ATOM       | 96  | HB1 | ASP | 8  | 18.067 | -1.147 | 18.043 | 1.00 |
| 29.39      |     |     | H   |    |        |        |        |      |
| ATOM       | 97  | HB2 | ASP | 8  | 17.687 | -1.129 | 16.321 | 1.00 |
| 44.14      |     |     | H   |    |        |        |        |      |
| ATOM       | 98  | N   | CYS | 9  | 16.199 | -2.047 | 19.972 | 1.00 |
| 5.93       |     |     | N   |    |        |        |        |      |
| ATOM       | 99  | CA  | CYS | 9  | 16.116 | -2.677 | 21.282 | 1.00 |
| 7.54       |     |     | C   |    |        |        |        |      |
| ATOM       | 100 | C   | CYS | 9  | 14.733 | -3.285 | 21.480 | 1.00 |
| 14.60      |     |     | C   |    |        |        |        |      |
| ATOM       | 101 | O   | CYS | 9  | 14.590 | -4.392 | 22.001 | 1.00 |
| 25.78      |     |     | O   |    |        |        |        |      |
| ATOM       | 102 | CB  | CYS | 9  | 16.392 | -1.652 | 22.373 | 1.00 |
| 6.63       |     |     | C   |    |        |        |        |      |
| ATOM       | 103 | SG  | CYS | 9  | 18.142 | -1.228 | 22.326 | 1.00 |
| 10.91      |     |     | S   |    |        |        |        |      |
| ATOM       | 104 | HN  | CYS | 9  | 16.359 | -1.083 | 19.907 | 1.00 |
| 6.51       |     |     | H   |    |        |        |        |      |
| ATOM       | 105 | HA  | CYS | 9  | 16.863 | -3.450 | 21.347 | 1.00 |
| 11.12      |     |     | H   |    |        |        |        |      |
| ATOM       | 106 | HB1 | CYS | 9  | 16.149 | -2.070 | 23.337 | 1.00 |
| 11.28      |     |     | H   |    |        |        |        |      |
| ATOM       | 107 | HB2 | CYS | 9  | 15.798 | -0.767 | 22.200 | 1.00 |
| 5.04       |     |     | H   |    |        |        |        |      |
| ATOM       | 108 | N   | ALA | 10 | 13.718 | -2.546 | 21.047 | 1.00 |
| 16.26      |     |     | N   |    |        |        |        |      |
| ATOM       | 109 | CA  | ALA | 10 | 12.336 | -2.997 | 21.155 | 1.00 |
| 32.04      |     |     | C   |    |        |        |        |      |
| ATOM       | 110 | C   | ALA | 10 | 11.424 | -2.070 | 20.356 | 1.00 |
| 45.47      |     |     | C   |    |        |        |        |      |
| ATOM       | 111 | O   | ALA | 10 | 11.841 | -0.992 | 19.933 |      |
| 1.00119.04 |     |     | O   |    |        |        |        |      |
| ATOM       | 112 | CB  | ALA | 10 | 11.901 | -3.030 | 22.627 | 1.00 |
| 30.10      |     |     | C   |    |        |        |        |      |
| ATOM       | 113 | HN  | ALA | 10 | 13.906 | -1.678 | 20.636 | 1.00 |
| 12.81      |     |     | H   |    |        |        |        |      |
| ATOM       | 114 | HA  | ALA | 10 | 12.263 | -3.995 | 20.747 | 1.00 |
| 47.14      |     |     | H   |    |        |        |        |      |
| ATOM       | 115 | HB1 | ALA | 10 | 12.736 | -3.329 | 23.240 | 1.00 |
| 84.37      |     |     | H   |    |        |        |        |      |

|      |            |     |     |    |        |        |        |      |
|------|------------|-----|-----|----|--------|--------|--------|------|
| ATOM | 116        | HB2 | ALA | 10 | 11.094 | -3.738 | 22.749 |      |
|      | 1.00118.20 |     |     |    |        |        |        | H    |
| ATOM | 117        | HB3 | ALA | 10 | 11.566 | -2.050 | 22.930 |      |
|      | 1.00117.32 |     |     |    |        |        |        | H    |
| ATOM | 118        | N   | ALA | 11 | 10.181 | -2.493 | 20.146 | 1.00 |
|      | 30.62      |     | N   |    |        |        |        |      |
| ATOM | 119        | CA  | ALA | 11 | 9.233  | -1.681 | 19.390 | 1.00 |
|      | 35.24      |     | C   |    |        |        |        |      |
| ATOM | 120        | C   | ALA | 11 | 9.001  | -0.337 | 20.076 | 1.00 |
|      | 22.78      |     | C   |    |        |        |        |      |
| ATOM | 121        | O   | ALA | 11 | 8.929  | 0.700  | 19.417 | 1.00 |
|      | 53.33      |     | O   |    |        |        |        |      |
| ATOM | 122        | CB  | ALA | 11 | 7.902  | -2.424 | 19.258 | 1.00 |
|      | 60.49      |     | C   |    |        |        |        |      |
| ATOM | 123        | HN  | ALA | 11 | 9.900  | -3.361 | 20.502 | 1.00 |
|      | 50.37      |     | H   |    |        |        |        |      |
| ATOM | 124        | HA  | ALA | 11 | 9.633  | -1.507 | 18.403 | 1.00 |
|      | 41.70      |     | H   |    |        |        |        |      |
| ATOM | 125        | HB1 | ALA | 11 | 7.281  | -1.922 | 18.532 |      |
|      | 1.00157.06 |     |     |    |        |        |        | H    |
| ATOM | 126        | HB2 | ALA | 11 | 7.401  | -2.437 | 20.214 |      |
|      | 1.00148.83 |     |     |    |        |        |        | H    |
| ATOM | 127        | HB3 | ALA | 11 | 8.087  | -3.438 | 18.934 |      |
|      | 1.00137.06 |     |     |    |        |        |        | H    |
| ATOM | 128        | N   | ASP | 12 | 8.882  | -0.361 | 21.401 | 1.00 |
|      | 18.98      |     | N   |    |        |        |        |      |
| ATOM | 129        | CA  | ASP | 12 | 8.654  | 0.866  | 22.165 | 1.00 |
|      | 31.05      |     | C   |    |        |        |        |      |
| ATOM | 130        | C   | ASP | 12 | 9.969  | 1.582  | 22.457 | 1.00 |
|      | 22.98      |     | C   |    |        |        |        |      |
| ATOM | 131        | O   | ASP | 12 | 10.015 | 2.810  | 22.531 | 1.00 |
|      | 37.14      |     | O   |    |        |        |        |      |
| ATOM | 132        | CB  | ASP | 12 | 7.955  | 0.530  | 23.485 | 1.00 |
|      | 48.35      |     | C   |    |        |        |        |      |
| ATOM | 133        | CG  | ASP | 12 | 6.529  | 0.060  | 23.213 |      |
|      | 1.00104.83 |     |     |    |        |        |        | C    |
| ATOM | 134        | OD1 | ASP | 12 | 5.932  | -0.508 | 24.113 |      |
|      | 1.00258.73 |     |     |    |        |        |        | O    |
| ATOM | 135        | OD2 | ASP | 12 | 6.056  | 0.275  | 22.110 |      |
|      | 1.00213.46 |     |     |    |        |        |        | O1-  |
| ATOM | 136        | HN  | ASP | 12 | 8.946  | -1.218 | 21.874 | 1.00 |
|      | 36.19      |     | H   |    |        |        |        |      |
| ATOM | 137        | HA  | ASP | 12 | 8.016  | 1.523  | 21.594 | 1.00 |
|      | 49.76      |     | H   |    |        |        |        |      |
| ATOM | 138        | HB1 | ASP | 12 | 7.928  | 1.410  | 24.109 | 1.00 |
|      | 95.71      |     | H   |    |        |        |        |      |
| ATOM | 139        | HB2 | ASP | 12 | 8.501  | -0.252 | 23.990 | 1.00 |
|      | 54.37      |     | H   |    |        |        |        |      |
| ATOM | 140        | N   | GLU | 13 | 11.036 | 0.808  | 22.631 | 1.00 |
|      | 17.60      |     | N   |    |        |        |        |      |
| ATOM | 141        | CA  | GLU | 13 | 12.347 | 1.379  | 22.924 | 1.00 |
|      | 12.01      |     | C   |    |        |        |        |      |

|            |     |     |     |    |        |        |        |      |
|------------|-----|-----|-----|----|--------|--------|--------|------|
| ATOM       | 142 | C   | GLU | 13 | 12.938 | 2.048  | 21.687 | 1.00 |
| 10.07      |     |     | C   |    |        |        |        |      |
| ATOM       | 143 | O   | GLU | 13 | 12.550 | 1.745  | 20.559 | 1.00 |
| 12.81      |     |     | O   |    |        |        |        |      |
| ATOM       | 144 | CB  | GLU | 13 | 13.290 | 0.282  | 23.419 | 1.00 |
| 11.74      |     |     | C   |    |        |        |        |      |
| ATOM       | 145 | CG  | GLU | 13 | 12.785 | -0.253 | 24.761 | 1.00 |
| 13.49      |     |     | C   |    |        |        |        |      |
| ATOM       | 146 | CD  | GLU | 13 | 13.596 | -1.478 | 25.173 |      |
| 1.00142.36 |     |     | C   |    |        |        |        |      |
| ATOM       | 147 | OE1 | GLU | 13 | 12.987 | -2.480 | 25.510 |      |
| 1.00339.06 |     |     | O   |    |        |        |        |      |
| ATOM       | 148 | OE2 | GLU | 13 | 14.812 | -1.393 | 25.149 |      |
| 1.00335.28 |     |     | O1- |    |        |        |        |      |
| ATOM       | 149 | HN  | GLU | 13 | 10.937 | -0.166 | 22.566 | 1.00 |
| 28.36      |     |     | H   |    |        |        |        |      |
| ATOM       | 150 | HA  | GLU | 13 | 12.237 | 2.118  | 23.702 | 1.00 |
| 13.06      |     |     | H   |    |        |        |        |      |
| ATOM       | 151 | HB1 | GLU | 13 | 14.281 | 0.688  | 23.546 | 1.00 |
| 13.76      |     |     | H   |    |        |        |        |      |
| ATOM       | 152 | HB2 | GLU | 13 | 13.319 | -0.521 | 22.697 | 1.00 |
| 9.94       |     |     | H   |    |        |        |        |      |
| ATOM       | 153 | HG1 | GLU | 13 | 11.745 | -0.524 | 24.674 | 1.00 |
| 66.02      |     |     | H   |    |        |        |        |      |
| ATOM       | 154 | HG2 | GLU | 13 | 12.893 | 0.515  | 25.514 | 1.00 |
| 56.23      |     |     | H   |    |        |        |        |      |
| ATOM       | 155 | N   | CYS | 14 | 13.883 | 2.965  | 21.909 | 1.00 |
| 9.12       |     |     | N   |    |        |        |        |      |
| ATOM       | 156 | CA  | CYS | 14 | 14.539 | 3.688  | 20.816 | 1.00 |
| 10.69      |     |     | C   |    |        |        |        |      |
| ATOM       | 157 | C   | CYS | 14 | 15.998 | 3.264  | 20.707 | 1.00 |
| 9.56       |     |     | C   |    |        |        |        |      |
| ATOM       | 158 | O   | CYS | 14 | 16.635 | 2.960  | 21.711 | 1.00 |
| 13.62      |     |     | O   |    |        |        |        |      |
| ATOM       | 159 | CB  | CYS | 14 | 14.470 | 5.195  | 21.070 | 1.00 |
| 13.96      |     |     | C   |    |        |        |        |      |
| ATOM       | 160 | SG  | CYS | 14 | 15.336 | 6.070  | 19.742 | 1.00 |
| 42.96      |     |     | S   |    |        |        |        |      |
| ATOM       | 161 | HN  | CYS | 14 | 14.148 | 3.160  | 22.833 | 1.00 |
| 9.76       |     |     | H   |    |        |        |        |      |
| ATOM       | 162 | HA  | CYS | 14 | 14.038 | 3.469  | 19.882 | 1.00 |
| 15.54      |     |     | H   |    |        |        |        |      |
| ATOM       | 163 | HB1 | CYS | 14 | 14.939 | 5.420  | 22.016 | 1.00 |
| 50.72      |     |     | H   |    |        |        |        |      |
| ATOM       | 164 | HB2 | CYS | 14 | 13.437 | 5.510  | 21.095 | 1.00 |
| 46.13      |     |     | H   |    |        |        |        |      |
| ATOM       | 165 | N   | CYS | 15 | 16.522 | 3.251  | 19.482 | 1.00 |
| 9.60       |     |     | N   |    |        |        |        |      |
| ATOM       | 166 | CA  | CYS | 15 | 17.915 | 2.867  | 19.250 | 1.00 |
| 9.28       |     |     | C   |    |        |        |        |      |
| ATOM       | 167 | C   | CYS | 15 | 18.505 | 3.766  | 18.176 | 1.00 |
| 9.92       |     |     | C   |    |        |        |        |      |

|            |     |      |     |    |        |       |        |      |
|------------|-----|------|-----|----|--------|-------|--------|------|
| ATOM       | 168 | O    | CYS | 15 | 17.920 | 3.930 | 17.105 | 1.00 |
| 13.31      |     |      | O   |    |        |       |        |      |
| ATOM       | 169 | CB   | CYS | 15 | 17.989 | 1.407 | 18.793 | 1.00 |
| 12.90      |     |      | C   |    |        |       |        |      |
| ATOM       | 170 | SG   | CYS | 15 | 19.704 | 0.820 | 18.873 | 1.00 |
| 39.11      |     |      | S   |    |        |       |        |      |
| ATOM       | 171 | HN   | CYS | 15 | 15.967 | 3.512 | 18.718 | 1.00 |
| 13.12      |     |      | H   |    |        |       |        |      |
| ATOM       | 172 | HA   | CYS | 15 | 18.484 | 2.984 | 20.161 | 1.00 |
| 8.26       |     |      | H   |    |        |       |        |      |
| ATOM       | 173 | HB1  | CYS | 15 | 17.630 | 1.331 | 17.777 | 1.00 |
| 24.82      |     |      | H   |    |        |       |        |      |
| ATOM       | 174 | HB2  | CYS | 15 | 17.372 | 0.797 | 19.436 | 1.00 |
| 27.31      |     |      | H   |    |        |       |        |      |
| ATOM       | 175 | N    | VAL | 16 | 19.662 | 4.355 | 18.460 | 1.00 |
| 9.56       |     |      | N   |    |        |       |        |      |
| ATOM       | 176 | CA   | VAL | 16 | 20.305 | 5.240 | 17.499 | 1.00 |
| 11.99      |     |      | C   |    |        |       |        |      |
| ATOM       | 177 | C    | VAL | 16 | 21.820 | 5.168 | 17.641 | 1.00 |
| 7.73       |     |      | C   |    |        |       |        |      |
| ATOM       | 178 | O    | VAL | 16 | 22.357 | 5.248 | 18.746 | 1.00 |
| 8.83       |     |      | O   |    |        |       |        |      |
| ATOM       | 179 | CB   | VAL | 16 | 19.816 | 6.673 | 17.719 | 1.00 |
| 18.37      |     |      | C   |    |        |       |        |      |
| ATOM       | 180 | CG1  | VAL | 16 | 20.280 | 7.180 | 19.086 | 1.00 |
| 39.61      |     |      | C   |    |        |       |        |      |
| ATOM       | 181 | CG2  | VAL | 16 | 20.371 | 7.575 | 16.618 |      |
| 1.00115.21 |     |      | C   |    |        |       |        |      |
| ATOM       | 182 | HN   | VAL | 16 | 20.089 | 4.194 | 19.332 | 1.00 |
| 9.76       |     |      | H   |    |        |       |        |      |
| ATOM       | 183 | HA   | VAL | 16 | 20.040 | 4.933 | 16.496 | 1.00 |
| 17.27      |     |      | H   |    |        |       |        |      |
| ATOM       | 184 | HB   | VAL | 16 | 18.736 | 6.689 | 17.682 | 1.00 |
| 52.63      |     |      | H   |    |        |       |        |      |
| ATOM       | 185 | HG11 | VAL | 16 | 21.347 | 7.340 | 19.069 |      |
| 1.00128.07 |     |      | H   |    |        |       |        |      |
| ATOM       | 186 | HG12 | VAL | 16 | 20.037 | 6.447 | 19.840 |      |
| 1.00154.13 |     |      | H   |    |        |       |        |      |
| ATOM       | 187 | HG13 | VAL | 16 | 19.781 | 8.110 | 19.313 |      |
| 1.00135.74 |     |      | H   |    |        |       |        |      |
| ATOM       | 188 | HG21 | VAL | 16 | 20.027 | 8.586 | 16.776 |      |
| 1.00229.05 |     |      | H   |    |        |       |        |      |
| ATOM       | 189 | HG22 | VAL | 16 | 20.025 | 7.222 | 15.659 |      |
| 1.00261.82 |     |      | H   |    |        |       |        |      |
| ATOM       | 190 | HG23 | VAL | 16 | 21.450 | 7.552 | 16.644 |      |
| 1.00210.07 |     |      | H   |    |        |       |        |      |
| ATOM       | 191 | N    | ASP | 17 | 22.505 | 5.001 | 16.511 | 1.00 |
| 14.34      |     |      | N   |    |        |       |        |      |
| ATOM       | 192 | CA   | ASP | 17 | 23.963 | 4.902 | 16.509 | 1.00 |
| 11.90      |     |      | C   |    |        |       |        |      |
| ATOM       | 193 | C    | ASP | 17 | 24.600 | 6.249 | 16.188 | 1.00 |
| 13.15      |     |      | C   |    |        |       |        |      |



|            |     |      |     |    |        |        |        |      |
|------------|-----|------|-----|----|--------|--------|--------|------|
| ATOM       | 194 | O    | ASP | 17 | 24.362 | 6.824  | 15.127 | 1.00 |
| 25.96      |     |      | O   |    |        |        |        |      |
| ATOM       | 195 | CB   | ASP | 17 | 24.409 | 3.875  | 15.467 | 1.00 |
| 20.80      |     |      | C   |    |        |        |        |      |
| ATOM       | 196 | CG   | ASP | 17 | 24.034 | 2.471  | 15.925 | 1.00 |
| 28.72      |     |      | C   |    |        |        |        |      |
| ATOM       | 197 | OD1  | ASP | 17 | 23.719 | 2.315  | 17.093 |      |
| 1.00135.42 |     |      | O   |    |        |        |        |      |
| ATOM       | 198 | OD2  | ASP | 17 | 24.063 | 1.574  | 15.099 |      |
| 1.00114.17 |     |      | O1- |    |        |        |        |      |
| ATOM       | 199 | HN   | ASP | 17 | 22.018 | 4.932  | 15.663 | 1.00 |
| 28.29      |     |      | H   |    |        |        |        |      |
| ATOM       | 200 | HA   | ASP | 17 | 24.305 | 4.575  | 17.482 | 1.00 |
| 10.49      |     |      | H   |    |        |        |        |      |
| ATOM       | 201 | HB1  | ASP | 17 | 25.479 | 3.936  | 15.339 | 1.00 |
| 22.42      |     |      | H   |    |        |        |        |      |
| ATOM       | 202 | HB2  | ASP | 17 | 23.924 | 4.088  | 14.525 | 1.00 |
| 29.52      |     |      | H   |    |        |        |        |      |
| ATOM       | 203 | N    | THR | 18 | 25.426 | 6.737  | 17.111 | 1.00 |
| 11.55      |     |      | N   |    |        |        |        |      |
| ATOM       | 204 | CA   | THR | 18 | 26.123 | 8.012  | 16.927 | 1.00 |
| 17.10      |     |      | C   |    |        |        |        |      |
| ATOM       | 205 | C    | THR | 18 | 27.579 | 7.757  | 16.562 | 1.00 |
| 10.63      |     |      | C   |    |        |        |        |      |
| ATOM       | 206 | O    | THR | 18 | 28.077 | 6.644  | 16.718 | 1.00 |
| 6.49       |     |      | O   |    |        |        |        |      |
| ATOM       | 207 | CB   | THR | 18 | 26.054 | 8.843  | 18.214 | 1.00 |
| 28.52      |     |      | C   |    |        |        |        |      |
| ATOM       | 208 | CG2  | THR | 18 | 24.661 | 9.452  | 18.367 | 1.00 |
| 45.38      |     |      | C   |    |        |        |        |      |
| ATOM       | 209 | OG1  | THR | 18 | 26.338 | 8.009  | 19.326 | 1.00 |
| 26.49      |     |      | O   |    |        |        |        |      |
| ATOM       | 210 | HN   | THR | 18 | 25.583 | 6.223  | 17.930 | 1.00 |
| 13.96      |     |      | H   |    |        |        |        |      |
| ATOM       | 211 | HA   | THR | 18 | 25.656 | 8.569  | 16.126 | 1.00 |
| 26.43      |     |      | H   |    |        |        |        |      |
| ATOM       | 212 | HB   | THR | 18 | 26.783 | 9.638  | 18.167 | 1.00 |
| 37.43      |     |      | H   |    |        |        |        |      |
| ATOM       | 213 | HG1  | THR | 18 | 25.632 | 7.361  | 19.396 | 1.00 |
| 71.62      |     |      | H   |    |        |        |        |      |
| ATOM       | 214 | HG21 | THR | 18 | 24.525 | 9.780  | 19.388 |      |
| 1.00100.44 |     |      | H   |    |        |        |        |      |
| ATOM       | 215 | HG22 | THR | 18 | 23.914 | 8.711  | 18.123 |      |
| 1.00129.42 |     |      | H   |    |        |        |        |      |
| ATOM       | 216 | HG23 | THR | 18 | 24.565 | 10.296 | 17.702 |      |
| 1.00156.21 |     |      | H   |    |        |        |        |      |
| ATOM       | 217 | N    | VAL | 19 | 28.253 | 8.801  | 16.094 | 1.00 |
| 16.32      |     |      | N   |    |        |        |        |      |
| ATOM       | 218 | CA   | VAL | 19 | 29.643 | 8.711  | 15.716 | 1.00 |
| 13.34      |     |      | C   |    |        |        |        |      |
| ATOM       | 219 | C    | VAL | 19 | 30.099 | 10.052 | 15.182 | 1.00 |
| 25.88      |     |      | C   |    |        |        |        |      |

|            |     |      |     |    |        |        |        |      |
|------------|-----|------|-----|----|--------|--------|--------|------|
| ATOM       | 220 | O    | VAL | 19 | 29.569 | 10.579 | 14.203 | 1.00 |
| 42.11      |     | O    |     |    |        |        |        |      |
| ATOM       | 221 | CB   | VAL | 19 | 29.881 | 7.621  | 14.671 | 1.00 |
| 15.48      |     | C    |     |    |        |        |        |      |
| ATOM       | 222 | CG1  | VAL | 19 | 28.897 | 7.782  | 13.509 | 1.00 |
| 29.06      |     | C    |     |    |        |        |        |      |
| ATOM       | 223 | CG2  | VAL | 19 | 31.320 | 7.738  | 14.152 | 1.00 |
| 20.67      |     | C    |     |    |        |        |        |      |
| ATOM       | 224 | HN   | VAL | 19 | 27.812 | 9.665  | 16.012 | 1.00 |
| 26.89      |     | H    |     |    |        |        |        |      |
| ATOM       | 225 | HA   | VAL | 19 | 30.226 | 8.479  | 16.598 | 1.00 |
| 8.08       |     | H    |     |    |        |        |        |      |
| ATOM       | 226 | HB   | VAL | 19 | 29.744 | 6.657  | 15.133 | 1.00 |
| 11.49      |     | H    |     |    |        |        |        |      |
| ATOM       | 227 | HG11 | VAL | 19 | 29.168 | 8.649  | 12.924 |      |
| 1.00137.43 |     |      |     |    |        |        |        | H    |
| ATOM       | 228 | HG12 | VAL | 19 | 27.897 | 7.906  | 13.895 | 1.00 |
| 93.29      |     | H    |     |    |        |        |        |      |
| ATOM       | 229 | HG13 | VAL | 19 | 28.935 | 6.903  | 12.883 |      |
| 1.00108.69 |     |      |     |    |        |        |        | H    |
| ATOM       | 230 | HG21 | VAL | 19 | 31.597 | 6.826  | 13.645 | 1.00 |
| 99.42      |     | H    |     |    |        |        |        |      |
| ATOM       | 231 | HG22 | VAL | 19 | 31.989 | 7.911  | 14.983 |      |
| 1.00111.36 |     |      |     |    |        |        |        | H    |
| ATOM       | 232 | HG23 | VAL | 19 | 31.387 | 8.569  | 13.464 | 1.00 |
| 77.11      |     | H    |     |    |        |        |        |      |
| ATOM       | 233 | N    | PHE | 20 | 31.072 | 10.591 | 15.866 | 1.00 |
| 24.58      |     | N    |     |    |        |        |        |      |
| ATOM       | 234 | CA   | PHE | 20 | 31.641 | 11.887 | 15.540 | 1.00 |
| 40.34      |     | C    |     |    |        |        |        |      |
| ATOM       | 235 | C    | PHE | 20 | 32.872 | 11.743 | 14.651 | 1.00 |
| 40.37      |     | C    |     |    |        |        |        |      |
| ATOM       | 236 | O    | PHE | 20 | 32.774 | 11.665 | 13.426 | 1.00 |
| 66.02      |     | O    |     |    |        |        |        |      |
| ATOM       | 237 | CB   | PHE | 20 | 32.016 | 12.615 | 16.852 | 1.00 |
| 48.79      |     | C    |     |    |        |        |        |      |
| ATOM       | 238 | CG   | PHE | 20 | 32.324 | 11.616 | 17.961 | 1.00 |
| 35.75      |     | C    |     |    |        |        |        |      |
| ATOM       | 239 | CD1  | PHE | 20 | 31.304 | 10.805 | 18.495 | 1.00 |
| 30.20      |     | C    |     |    |        |        |        |      |
| ATOM       | 240 | CD2  | PHE | 20 | 33.625 | 11.517 | 18.468 | 1.00 |
| 40.95      |     | C    |     |    |        |        |        |      |
| ATOM       | 241 | CE1  | PHE | 20 | 31.596 | 9.902  | 19.523 | 1.00 |
| 30.41      |     | C    |     |    |        |        |        |      |
| ATOM       | 242 | CE2  | PHE | 20 | 33.912 | 10.612 | 19.497 | 1.00 |
| 45.84      |     | C    |     |    |        |        |        |      |
| ATOM       | 243 | CZ   | PHE | 20 | 32.899 | 9.804  | 20.024 | 1.00 |
| 40.81      |     | C    |     |    |        |        |        |      |
| ATOM       | 244 | HN   | PHE | 20 | 31.405 | 10.104 | 16.637 | 1.00 |
| 16.73      |     | H    |     |    |        |        |        |      |
| ATOM       | 245 | HA   | PHE | 20 | 30.903 | 12.478 | 15.014 | 1.00 |
| 59.91      |     | H    |     |    |        |        |        |      |

|            |     |     |     |    |        |        |        |      |
|------------|-----|-----|-----|----|--------|--------|--------|------|
| ATOM       | 246 | HB1 | PHE | 20 | 31.196 | 13.217 | 17.158 | 1.00 |
| 67.15      |     | H   |     |    |        |        |        |      |
| ATOM       | 247 | HB2 | PHE | 20 | 32.873 | 13.254 | 16.695 | 1.00 |
| 58.17      |     | H   |     |    |        |        |        |      |
| ATOM       | 248 | HD1 | PHE | 20 | 30.296 | 10.866 | 18.109 | 1.00 |
| 33.34      |     | H   |     |    |        |        |        |      |
| ATOM       | 249 | HD2 | PHE | 20 | 34.407 | 12.140 | 18.069 | 1.00 |
| 49.35      |     | H   |     |    |        |        |        |      |
| ATOM       | 250 | HE1 | PHE | 20 | 30.814 | 9.283  | 19.930 | 1.00 |
| 30.61      |     | H   |     |    |        |        |        |      |
| ATOM       | 251 | HE2 | PHE | 20 | 34.919 | 10.535 | 19.883 | 1.00 |
| 61.27      |     | H   |     |    |        |        |        |      |
| ATOM       | 252 | HZ  | PHE | 20 | 33.121 | 9.107  | 20.817 | 1.00 |
| 52.66      |     | H   |     |    |        |        |        |      |
| ATOM       | 253 | N   | GLU | 21 | 34.024 | 11.734 | 15.293 | 1.00 |
| 41.31      |     | N   |     |    |        |        |        |      |
| ATOM       | 254 | CA  | GLU | 21 | 35.296 | 11.634 | 14.600 | 1.00 |
| 56.16      |     | C   |     |    |        |        |        |      |
| ATOM       | 255 | C   | GLU | 21 | 35.545 | 10.205 | 14.109 | 1.00 |
| 58.61      |     | C   |     |    |        |        |        |      |
| ATOM       | 256 | O   | GLU | 21 | 36.238 | 9.998  | 13.113 |      |
| 1.00201.19 |     |     | O   |    |        |        |        |      |
| ATOM       | 257 | CB  | GLU | 21 | 36.390 | 12.109 | 15.568 | 1.00 |
| 57.37      |     | C   |     |    |        |        |        |      |
| ATOM       | 258 | CG  | GLU | 21 | 37.758 | 11.517 | 15.202 |      |
| 1.00193.56 |     |     | C   |    |        |        |        |      |
| ATOM       | 259 | CD  | GLU | 21 | 38.857 | 12.218 | 15.994 |      |
| 1.00304.62 |     |     | C   |    |        |        |        |      |
| ATOM       | 260 | OE1 | GLU | 21 | 38.595 | 12.592 | 17.126 |      |
| 1.00451.81 |     |     | O   |    |        |        |        |      |
| ATOM       | 261 | OE2 | GLU | 21 | 39.942 | 12.368 | 15.458 |      |
| 1.00442.88 |     |     | O1- |    |        |        |        |      |
| ATOM       | 262 | HN  | GLU | 21 | 34.020 | 11.815 | 16.269 | 1.00 |
| 50.82      |     | H   |     |    |        |        |        |      |
| ATOM       | 263 | HA  | GLU | 21 | 35.279 | 12.294 | 13.745 | 1.00 |
| 85.72      |     | H   |     |    |        |        |        |      |
| ATOM       | 264 | HB1 | GLU | 21 | 36.116 | 11.810 | 16.569 | 1.00 |
| 46.37      |     | H   |     |    |        |        |        |      |
| ATOM       | 265 | HB2 | GLU | 21 | 36.453 | 13.189 | 15.530 |      |
| 1.00131.81 |     |     | H   |    |        |        |        |      |
| ATOM       | 266 | HG1 | GLU | 21 | 37.937 | 11.653 | 14.147 |      |
| 1.00314.91 |     |     | H   |    |        |        |        |      |
| ATOM       | 267 | HG2 | GLU | 21 | 37.766 | 10.462 | 15.436 |      |
| 1.00266.92 |     |     | H   |    |        |        |        |      |
| ATOM       | 268 | N   | GLY | 22 | 34.977 | 9.226  | 14.808 | 1.00 |
| 86.70      |     | N   |     |    |        |        |        |      |
| ATOM       | 269 | CA  | GLY | 22 | 35.144 | 7.820  | 14.428 |      |
| 1.00104.66 |     |     | C   |    |        |        |        |      |
| ATOM       | 270 | C   | GLY | 22 | 36.188 | 7.131  | 15.301 | 1.00 |
| 71.50      |     | C   |     |    |        |        |        |      |
| ATOM       | 271 | O   | GLY | 22 | 36.279 | 5.903  | 15.314 | 1.00 |
| 89.87      |     | O   |     |    |        |        |        |      |

|            |     |     |     |    |        |        |        |      |
|------------|-----|-----|-----|----|--------|--------|--------|------|
| ATOM       | 272 | HN  | GLY | 22 | 34.433 | 9.449  | 15.593 |      |
| 1.00214.64 |     |     |     |    |        |        |        | H    |
| ATOM       | 273 | HA1 | GLY | 22 | 35.455 | 7.756  | 13.394 |      |
| 1.00152.47 |     |     |     |    |        |        |        | H    |
| ATOM       | 274 | HA2 | GLY | 22 | 34.201 | 7.312  | 14.543 |      |
| 1.00118.15 |     |     |     |    |        |        |        | H    |
| ATOM       | 275 | N   | ASP | 23 | 36.965 | 7.917  | 16.038 | 1.00 |
| 44.68      |     |     | N   |    |        |        |        |      |
| ATOM       | 276 | CA  | ASP | 23 | 37.981 | 7.346  | 16.914 | 1.00 |
| 43.33      |     |     | C   |    |        |        |        |      |
| ATOM       | 277 | C   | ASP | 23 | 37.317 | 6.451  | 17.952 | 1.00 |
| 37.55      |     |     | C   |    |        |        |        |      |
| ATOM       | 278 | O   | ASP | 23 | 37.825 | 5.382  | 18.289 | 1.00 |
| 61.37      |     |     | O   |    |        |        |        |      |
| ATOM       | 279 | CB  | ASP | 23 | 38.764 | 8.458  | 17.617 | 1.00 |
| 40.74      |     |     | C   |    |        |        |        |      |
| ATOM       | 280 | CG  | ASP | 23 | 39.687 | 9.155  | 16.624 |      |
| 1.00141.86 |     |     |     |    |        |        |        | C    |
| ATOM       | 281 | OD1 | ASP | 23 | 39.854 | 8.636  | 15.533 |      |
| 1.00328.18 |     |     |     |    |        |        |        | O    |
| ATOM       | 282 | OD2 | ASP | 23 | 40.215 | 10.200 | 16.970 |      |
| 1.00304.58 |     |     |     |    |        |        |        | O1-  |
| ATOM       | 283 | HN  | ASP | 23 | 36.848 | 8.890  | 16.000 | 1.00 |
| 40.86      |     |     | H   |    |        |        |        |      |
| ATOM       | 284 | HA  | ASP | 23 | 38.664 | 6.754  | 16.323 | 1.00 |
| 72.12      |     |     | H   |    |        |        |        |      |
| ATOM       | 285 | HB1 | ASP | 23 | 39.354 | 8.032  | 18.414 | 1.00 |
| 94.15      |     |     | H   |    |        |        |        |      |
| ATOM       | 286 | HB2 | ASP | 23 | 38.070 | 9.177  | 18.028 | 1.00 |
| 93.26      |     |     | H   |    |        |        |        |      |
| ATOM       | 287 | N   | MET | 24 | 36.165 | 6.900  | 18.441 | 1.00 |
| 23.24      |     |     | N   |    |        |        |        |      |
| ATOM       | 288 | CA  | MET | 24 | 35.398 | 6.153  | 19.435 | 1.00 |
| 32.50      |     |     | C   |    |        |        |        |      |
| ATOM       | 289 | C   | MET | 24 | 33.917 | 6.201  | 19.080 | 1.00 |
| 25.13      |     |     | C   |    |        |        |        |      |
| ATOM       | 290 | O   | MET | 24 | 33.248 | 7.207  | 19.322 | 1.00 |
| 54.40      |     |     | O   |    |        |        |        |      |
| ATOM       | 291 | CB  | MET | 24 | 35.607 | 6.766  | 20.820 | 1.00 |
| 47.36      |     |     | C   |    |        |        |        |      |
| ATOM       | 292 | CG  | MET | 24 | 37.099 | 6.774  | 21.155 |      |
| 1.00151.73 |     |     |     |    |        |        |        | C    |
| ATOM       | 293 | SD  | MET | 24 | 37.347 | 7.508  | 22.792 |      |
| 1.00209.23 |     |     |     |    |        |        |        | S    |
| ATOM       | 294 | CE  | MET | 24 | 36.890 | 9.209  | 22.368 |      |
| 1.00243.29 |     |     |     |    |        |        |        | C    |
| ATOM       | 295 | HN  | MET | 24 | 35.816 | 7.758  | 18.119 | 1.00 |
| 17.32      |     |     | H   |    |        |        |        |      |
| ATOM       | 296 | HA  | MET | 24 | 35.724 | 5.121  | 19.452 | 1.00 |
| 48.94      |     |     | H   |    |        |        |        |      |
| ATOM       | 297 | HB1 | MET | 24 | 35.078 | 6.181  | 21.557 |      |
| 1.00124.40 |     |     |     |    |        |        |        | H    |

|            |     |      |     |    |        |       |        |      |
|------------|-----|------|-----|----|--------|-------|--------|------|
| ATOM       | 298 | HB2  | MET | 24 | 35.230 | 7.778 | 20.825 |      |
| 1.00166.96 |     |      |     |    |        |       |        | H    |
| ATOM       | 299 | HG1  | MET | 24 | 37.633 | 7.351 | 20.414 |      |
| 1.00331.71 |     |      |     |    |        |       |        | H    |
| ATOM       | 300 | HG2  | MET | 24 | 37.471 | 5.761 | 21.156 |      |
| 1.00302.30 |     |      |     |    |        |       |        | H    |
| ATOM       | 301 | HE1  | MET | 24 | 35.821 | 9.332 | 22.472 |      |
| 1.00340.44 |     |      |     |    |        |       |        | H    |
| ATOM       | 302 | HE2  | MET | 24 | 37.176 | 9.421 | 21.350 |      |
| 1.00373.88 |     |      |     |    |        |       |        | H    |
| ATOM       | 303 | HE3  | MET | 24 | 37.403 | 9.893 | 23.030 |      |
| 1.00386.81 |     |      |     |    |        |       |        | H    |
| ATOM       | 304 | N    | VAL | 25 | 33.407 | 5.123 | 18.497 | 1.00 |
| 22.44      |     |      | N   |    |        |       |        |      |
| ATOM       | 305 | CA   | VAL | 25 | 32.003 | 5.083 | 18.112 | 1.00 |
| 15.37      |     |      | C   |    |        |       |        |      |
| ATOM       | 306 | C    | VAL | 25 | 31.107 | 5.027 | 19.340 | 1.00 |
| 17.47      |     |      | C   |    |        |       |        |      |
| ATOM       | 307 | O    | VAL | 25 | 31.476 | 4.461 | 20.370 | 1.00 |
| 29.52      |     |      | O   |    |        |       |        |      |
| ATOM       | 308 | CB   | VAL | 25 | 31.715 | 3.885 | 17.211 | 1.00 |
| 23.36      |     |      | C   |    |        |       |        |      |
| ATOM       | 309 | CG1  | VAL | 25 | 30.223 | 3.881 | 16.853 | 1.00 |
| 58.39      |     |      | C   |    |        |       |        |      |
| ATOM       | 310 | CG2  | VAL | 25 | 32.551 | 3.996 | 15.932 | 1.00 |
| 55.25      |     |      | C   |    |        |       |        |      |
| ATOM       | 311 | HN   | VAL | 25 | 33.982 | 4.350 | 18.319 | 1.00 |
| 48.11      |     |      | H   |    |        |       |        |      |
| ATOM       | 312 | HA   | VAL | 25 | 31.775 | 5.985 | 17.563 | 1.00 |
| 9.25       |     |      | H   |    |        |       |        |      |
| ATOM       | 313 | HB   | VAL | 25 | 31.965 | 2.972 | 17.733 | 1.00 |
| 52.45      |     |      | H   |    |        |       |        |      |
| ATOM       | 314 | HG11 | VAL | 25 | 29.657 | 3.497 | 17.687 |      |
| 1.00171.07 |     |      |     |    |        |       |        | H    |
| ATOM       | 315 | HG12 | VAL | 25 | 30.060 | 3.257 | 15.989 |      |
| 1.00166.22 |     |      |     |    |        |       |        | H    |
| ATOM       | 316 | HG13 | VAL | 25 | 29.900 | 4.892 | 16.635 |      |
| 1.00134.76 |     |      |     |    |        |       |        | H    |
| ATOM       | 317 | HG21 | VAL | 25 | 32.301 | 3.184 | 15.266 |      |
| 1.00141.88 |     |      |     |    |        |       |        | H    |
| ATOM       | 318 | HG22 | VAL | 25 | 33.600 | 3.944 | 16.183 |      |
| 1.00184.50 |     |      |     |    |        |       |        | H    |
| ATOM       | 319 | HG23 | VAL | 25 | 32.343 | 4.937 | 15.446 |      |
| 1.00133.90 |     |      |     |    |        |       |        | H    |
| ATOM       | 320 | N    | THR | 26 | 29.930 | 5.638 | 19.227 | 1.00 |
| 13.60      |     |      | N   |    |        |       |        |      |
| ATOM       | 321 | CA   | THR | 26 | 28.970 | 5.687 | 20.330 | 1.00 |
| 21.19      |     |      | C   |    |        |       |        |      |
| ATOM       | 322 | C    | THR | 26 | 27.600 | 5.161 | 19.905 | 1.00 |
| 16.55      |     |      | C   |    |        |       |        |      |
| ATOM       | 323 | O    | THR | 26 | 27.119 | 5.451 | 18.810 | 1.00 |
| 11.43      |     |      | O   |    |        |       |        |      |

|            |     |      |     |    |        |        |        |      |
|------------|-----|------|-----|----|--------|--------|--------|------|
| ATOM       | 324 | CB   | THR | 26 | 28.840 | 7.134  | 20.797 | 1.00 |
| 27.07      |     |      | C   |    |        |        |        |      |
| ATOM       | 325 | CG2  | THR | 26 | 27.762 | 7.243  | 21.880 | 1.00 |
| 44.39      |     |      | C   |    |        |        |        |      |
| ATOM       | 326 | OG1  | THR | 26 | 30.088 | 7.564  | 21.324 | 1.00 |
| 34.75      |     |      | O   |    |        |        |        |      |
| ATOM       | 327 | HN   | THR | 26 | 29.705 | 6.081  | 18.382 | 1.00 |
| 10.81      |     |      | H   |    |        |        |        |      |
| ATOM       | 328 | HA   | THR | 26 | 29.332 | 5.089  | 21.155 | 1.00 |
| 33.16      |     |      | H   |    |        |        |        |      |
| ATOM       | 329 | HB   | THR | 26 | 28.574 | 7.756  | 19.953 | 1.00 |
| 20.60      |     |      | H   |    |        |        |        |      |
| ATOM       | 330 | HG1  | THR | 26 | 30.783 | 7.217  | 20.759 | 1.00 |
| 77.72      |     |      | H   |    |        |        |        |      |
| ATOM       | 331 | HG21 | THR | 26 | 27.930 | 6.487  | 22.632 |      |
| 1.00126.99 |     |      | H   |    |        |        |        |      |
| ATOM       | 332 | HG22 | THR | 26 | 26.789 | 7.102  | 21.438 |      |
| 1.00108.32 |     |      | H   |    |        |        |        |      |
| ATOM       | 333 | HG23 | THR | 26 | 27.811 | 8.221  | 22.339 |      |
| 1.00151.99 |     |      | H   |    |        |        |        |      |
| ATOM       | 334 | N    | ARG | 27 | 26.975 | 4.390  | 20.797 | 1.00 |
| 22.38      |     |      | N   |    |        |        |        |      |
| ATOM       | 335 | CA   | ARG | 27 | 25.648 | 3.816  | 20.543 | 1.00 |
| 20.21      |     |      | C   |    |        |        |        |      |
| ATOM       | 336 | C    | ARG | 27 | 24.721 | 4.139  | 21.712 | 1.00 |
| 16.96      |     |      | C   |    |        |        |        |      |
| ATOM       | 337 | O    | ARG | 27 | 25.169 | 4.227  | 22.855 | 1.00 |
| 20.06      |     |      | O   |    |        |        |        |      |
| ATOM       | 338 | CB   | ARG | 27 | 25.765 | 2.299  | 20.394 | 1.00 |
| 22.14      |     |      | C   |    |        |        |        |      |
| ATOM       | 339 | CG   | ARG | 27 | 26.631 | 1.967  | 19.177 |      |
| 1.00124.30 |     |      | C   |    |        |        |        |      |
| ATOM       | 340 | CD   | ARG | 27 | 26.937 | 0.469  | 19.163 |      |
| 1.00109.38 |     |      | C   |    |        |        |        |      |
| ATOM       | 341 | NE   | ARG | 27 | 27.768 | 0.131  | 18.015 |      |
| 1.00227.73 |     |      | N   |    |        |        |        |      |
| ATOM       | 342 | CZ   | ARG | 27 | 28.317 | -1.074 | 17.897 |      |
| 1.00426.12 |     |      | C   |    |        |        |        |      |
| ATOM       | 343 | NH1  | ARG | 27 | 29.058 | -1.356 | 16.860 |      |
| 1.00767.09 |     |      | N1+ |    |        |        |        |      |
| ATOM       | 344 | NH2  | ARG | 27 | 28.117 | -1.974 | 18.820 |      |
| 1.00581.78 |     |      | N   |    |        |        |        |      |
| ATOM       | 345 | HN   | ARG | 27 | 27.414 | 4.206  | 21.654 | 1.00 |
| 30.75      |     |      | H   |    |        |        |        |      |
| ATOM       | 346 | HA   | ARG | 27 | 25.234 | 4.233  | 19.634 | 1.00 |
| 23.13      |     |      | H   |    |        |        |        |      |
| ATOM       | 347 | HB1  | ARG | 27 | 24.782 | 1.873  | 20.259 | 1.00 |
| 87.46      |     |      | H   |    |        |        |        |      |
| ATOM       | 348 | HB2  | ARG | 27 | 26.218 | 1.883  | 21.283 |      |
| 1.00103.36 |     |      | H   |    |        |        |        |      |
| ATOM       | 349 | HG1  | ARG | 27 | 27.556 | 2.521  | 19.231 |      |
| 1.00281.97 |     |      | H   |    |        |        |        |      |

|      |         |      |     |    |        |        |        |      |
|------|---------|------|-----|----|--------|--------|--------|------|
| ATOM | 350     | HG2  | ARG | 27 | 26.101 | 2.237  | 18.274 |      |
|      | 1.00276 |      |     |    |        |        |        | H    |
| ATOM | 351     | HD1  | ARG | 27 | 26.009 | -0.083 | 19.110 |      |
|      | 1.00183 |      |     |    |        |        |        | H    |
| ATOM | 352     | HD2  | ARG | 27 | 27.458 | 0.203  | 20.071 |      |
|      | 1.00142 |      |     |    |        |        |        | H    |
| ATOM | 353     | HE   | ARG | 27 | 27.926 | 0.803  | 17.319 |      |
|      | 1.00372 |      |     |    |        |        |        | H    |
| ATOM | 354     | HH11 | ARG | 27 | 29.213 | -0.665 | 16.154 |      |
|      | 1.00910 |      |     |    |        |        |        | H    |
| ATOM | 355     | HH12 | ARG | 27 | 29.471 | -2.261 | 16.772 |      |
|      | 1.00999 |      |     |    |        |        |        | H    |
| ATOM | 356     | HH21 | ARG | 27 | 27.550 | -1.758 | 19.615 |      |
|      | 1.00532 |      |     |    |        |        |        | H    |
| ATOM | 357     | HH22 | ARG | 27 | 28.530 | -2.881 | 18.731 |      |
|      | 1.00948 |      |     |    |        |        |        | H    |
| ATOM | 358     | N    | SER | 28 | 23.427 | 4.325  | 21.430 | 1.00 |
|      | 14.60   |      | N   |    |        |        |        |      |
| ATOM | 359     | CA   | SER | 28 | 22.461 | 4.647  | 22.487 | 1.00 |
|      | 14.92   |      | C   |    |        |        |        |      |
| ATOM | 360     | C    | SER | 28 | 21.194 | 3.809  | 22.351 | 1.00 |
|      | 12.12   |      | C   |    |        |        |        |      |
| ATOM | 361     | O    | SER | 28 | 20.778 | 3.461  | 21.244 | 1.00 |
|      | 13.41   |      | O   |    |        |        |        |      |
| ATOM | 362     | CB   | SER | 28 | 22.100 | 6.132  | 22.424 | 1.00 |
|      | 23.26   |      | C   |    |        |        |        |      |
| ATOM | 363     | OG   | SER | 28 | 23.264 | 6.908  | 22.679 |      |
|      | 1.00146 |      |     |    |        |        |        | O    |
| ATOM | 364     | HN   | SER | 28 | 23.116 | 4.250  | 20.502 | 1.00 |
|      | 15.23   |      | H   |    |        |        |        |      |
| ATOM | 365     | HA   | SER | 28 | 22.902 | 4.443  | 23.454 | 1.00 |
|      | 15.44   |      | H   |    |        |        |        |      |
| ATOM | 366     | HB1  | SER | 28 | 21.340 | 6.349  | 23.163 | 1.00 |
|      | 88.73   |      | H   |    |        |        |        |      |
| ATOM | 367     | HB2  | SER | 28 | 21.725 | 6.371  | 21.444 |      |
|      | 1.00124 |      |     |    |        |        |        | H    |
| ATOM | 368     | HG   | SER | 28 | 22.981 | 7.785  | 22.950 |      |
|      | 1.00242 |      |     |    |        |        |        | H    |
| ATOM | 369     | N    | CYS | 29 | 20.581 | 3.499  | 23.490 | 1.00 |
|      | 10.48   |      | N   |    |        |        |        |      |
| ATOM | 370     | CA   | CYS | 29 | 19.351 | 2.714  | 23.513 | 1.00 |
|      | 9.97    |      | C   |    |        |        |        |      |
| ATOM | 371     | C    | CYS | 29 | 18.837 | 2.626  | 24.950 | 1.00 |
|      | 11.60   |      | C   |    |        |        |        |      |
| ATOM | 372     | O    | CYS | 29 | 19.598 | 2.322  | 25.869 | 1.00 |
|      | 15.64   |      | O   |    |        |        |        |      |
| ATOM | 373     | CB   | CYS | 29 | 19.599 | 1.302  | 22.937 | 1.00 |
|      | 9.52    |      | C   |    |        |        |        |      |
| ATOM | 374     | SG   | CYS | 29 | 18.149 | 0.758  | 22.015 | 1.00 |
|      | 10.40   |      | S   |    |        |        |        |      |
| ATOM | 375     | HN   | CYS | 29 | 20.957 | 3.819  | 24.336 | 1.00 |
|      | 11.10   |      | H   |    |        |        |        |      |

|            |     |     |     |    |        |        |        |      |
|------------|-----|-----|-----|----|--------|--------|--------|------|
| ATOM       | 376 | HA  | CYS | 29 | 18.614 | 3.219  | 22.911 | 1.00 |
| 11.08      |     |     | H   |    |        |        |        |      |
| ATOM       | 377 | HB1 | CYS | 29 | 19.787 | 0.596  | 23.736 | 1.00 |
| 9.33       |     |     | H   |    |        |        |        |      |
| ATOM       | 378 | HB2 | CYS | 29 | 20.448 | 1.322  | 22.273 | 1.00 |
| 10.78      |     |     | H   |    |        |        |        |      |
| ATOM       | 379 | N   | GLU | 30 | 17.549 | 2.914  | 25.146 | 1.00 |
| 13.52      |     |     | N   |    |        |        |        |      |
| ATOM       | 380 | CA  | GLU | 30 | 16.953 | 2.885  | 26.482 | 1.00 |
| 17.41      |     |     | C   |    |        |        |        |      |
| ATOM       | 381 | C   | GLU | 30 | 16.021 | 1.684  | 26.636 | 1.00 |
| 10.81      |     |     | C   |    |        |        |        |      |
| ATOM       | 382 | O   | GLU | 30 | 15.663 | 1.030  | 25.655 | 1.00 |
| 23.22      |     |     | O   |    |        |        |        |      |
| ATOM       | 383 | CB  | GLU | 30 | 16.175 | 4.190  | 26.718 | 1.00 |
| 37.83      |     |     | C   |    |        |        |        |      |
| ATOM       | 384 | CG  | GLU | 30 | 15.564 | 4.669  | 25.399 |      |
| 1.00108.13 |     |     | C   |    |        |        |        |      |
| ATOM       | 385 | CD  | GLU | 30 | 14.714 | 3.561  | 24.790 |      |
| 1.00240.52 |     |     | C   |    |        |        |        |      |
| ATOM       | 386 | OE1 | GLU | 30 | 15.258 | 2.777  | 24.030 |      |
| 1.00422.56 |     |     | O   |    |        |        |        |      |
| ATOM       | 387 | OE2 | GLU | 30 | 13.533 | 3.512  | 25.092 |      |
| 1.00410.81 |     |     | O1- |    |        |        |        |      |
| ATOM       | 388 | HN  | GLU | 30 | 16.988 | 3.166  | 24.383 | 1.00 |
| 15.61      |     |     | H   |    |        |        |        |      |
| ATOM       | 389 | HA  | GLU | 30 | 17.736 | 2.809  | 27.227 | 1.00 |
| 24.60      |     |     | H   |    |        |        |        |      |
| ATOM       | 390 | HB1 | GLU | 30 | 16.847 | 4.948  | 27.093 | 1.00 |
| 72.67      |     |     | H   |    |        |        |        |      |
| ATOM       | 391 | HB2 | GLU | 30 | 15.390 | 4.022  | 27.437 | 1.00 |
| 56.47      |     |     | H   |    |        |        |        |      |
| ATOM       | 392 | HG1 | GLU | 30 | 16.351 | 4.936  | 24.712 |      |
| 1.00196.66 |     |     | H   |    |        |        |        |      |
| ATOM       | 393 | HG2 | GLU | 30 | 14.946 | 5.534  | 25.587 |      |
| 1.00140.67 |     |     | H   |    |        |        |        |      |
| ATOM       | 394 | N   | LYS | 31 | 15.634 | 1.405  | 27.882 | 1.00 |
| 11.96      |     |     | N   |    |        |        |        |      |
| ATOM       | 395 | CA  | LYS | 31 | 14.742 | 0.284  | 28.184 | 1.00 |
| 11.40      |     |     | C   |    |        |        |        |      |
| ATOM       | 396 | C   | LYS | 31 | 13.561 | 0.758  | 29.026 | 1.00 |
| 10.99      |     |     | C   |    |        |        |        |      |
| ATOM       | 397 | O   | LYS | 31 | 13.691 | 1.685  | 29.827 | 1.00 |
| 12.86      |     |     | O   |    |        |        |        |      |
| ATOM       | 398 | CB  | LYS | 31 | 15.510 | -0.797 | 28.947 | 1.00 |
| 21.40      |     |     | C   |    |        |        |        |      |
| ATOM       | 399 | CG  | LYS | 31 | 16.625 | -1.351 | 28.058 | 1.00 |
| 57.81      |     |     | C   |    |        |        |        |      |
| ATOM       | 400 | CD  | LYS | 31 | 17.398 | -2.429 | 28.818 |      |
| 1.00115.52 |     |     | C   |    |        |        |        |      |
| ATOM       | 401 | CE  | LYS | 31 | 18.517 | -2.975 | 27.930 |      |
| 1.00250.23 |     |     | C   |    |        |        |        |      |



|            |     |      |     |     |        |        |        |      |
|------------|-----|------|-----|-----|--------|--------|--------|------|
| ATOM       | 402 | NZ   | LYS | 31  | 19.279 | -4.018 | 28.673 |      |
| 1.00462.10 |     |      |     | N1+ |        |        |        |      |
| ATOM       | 403 | HN   | LYS | 31  | 15.957 | 1.967  | 28.617 | 1.00 |
| 26.13      |     |      | H   |     |        |        |        |      |
| ATOM       | 404 | HA   | LYS | 31  | 14.364 | -0.139 | 27.264 | 1.00 |
| 13.87      |     |      | H   |     |        |        |        |      |
| ATOM       | 405 | HB1  | LYS | 31  | 14.837 | -1.596 | 29.216 | 1.00 |
| 37.63      |     |      | H   |     |        |        |        |      |
| ATOM       | 406 | HB2  | LYS | 31  | 15.939 | -0.369 | 29.841 | 1.00 |
| 47.19      |     |      | H   |     |        |        |        |      |
| ATOM       | 407 | HG1  | LYS | 31  | 17.299 | -0.552 | 27.786 |      |
| 1.00126.32 |     |      |     | H   |        |        |        |      |
| ATOM       | 408 | HG2  | LYS | 31  | 16.194 | -1.778 | 27.164 |      |
| 1.00114.19 |     |      |     | H   |        |        |        |      |
| ATOM       | 409 | HD1  | LYS | 31  | 16.729 | -3.233 | 29.084 |      |
| 1.00198.45 |     |      |     | H   |        |        |        |      |
| ATOM       | 410 | HD2  | LYS | 31  | 17.824 | -2.002 | 29.715 |      |
| 1.00200.14 |     |      |     | H   |        |        |        |      |
| ATOM       | 411 | HE1  | LYS | 31  | 19.184 | -2.170 | 27.656 |      |
| 1.00374.64 |     |      |     | H   |        |        |        |      |
| ATOM       | 412 | HE2  | LYS | 31  | 18.090 | -3.409 | 27.038 |      |
| 1.00403.27 |     |      |     | H   |        |        |        |      |
| ATOM       | 413 | HZ1  | LYS | 31  | 19.229 | -4.919 | 28.157 |      |
| 1.00627.38 |     |      |     | H   |        |        |        |      |
| ATOM       | 414 | HZ2  | LYS | 31  | 18.866 | -4.139 | 29.621 |      |
| 1.00622.26 |     |      |     | H   |        |        |        |      |
| ATOM       | 415 | HZ3  | LYS | 31  | 20.272 | -3.726 | 28.762 |      |
| 1.00619.20 |     |      |     | H   |        |        |        |      |
| ATOM       | 416 | N    | THR | 32  | 12.411 | 0.118  | 28.840 | 1.00 |
| 15.51      |     |      | N   |     |        |        |        |      |
| ATOM       | 417 | CA   | THR | 32  | 11.206 | 0.481  | 29.586 | 1.00 |
| 22.44      |     |      | C   |     |        |        |        |      |
| ATOM       | 418 | C    | THR | 32  | 11.121 | -0.315 | 30.885 | 1.00 |
| 26.60      |     |      | C   |     |        |        |        |      |
| ATOM       | 419 | O    | THR | 32  | 11.117 | -1.545 | 30.871 | 1.00 |
| 57.43      |     |      | O   |     |        |        |        |      |
| ATOM       | 420 | CB   | THR | 32  | 9.967  | 0.201  | 28.735 | 1.00 |
| 56.28      |     |      | C   |     |        |        |        |      |
| ATOM       | 421 | CG2  | THR | 32  | 8.709  | 0.566  | 29.525 |      |
| 1.00102.70 |     |      |     | C   |        |        |        |      |
| ATOM       | 422 | OG1  | THR | 32  | 10.024 | 0.979  | 27.547 |      |
| 1.00111.17 |     |      |     | O   |        |        |        |      |
| ATOM       | 423 | HN   | THR | 32  | 12.367 | -0.612 | 28.187 | 1.00 |
| 18.79      |     |      | H   |     |        |        |        |      |
| ATOM       | 424 | HA   | THR | 32  | 11.234 | 1.536  | 29.819 | 1.00 |
| 19.67      |     |      | H   |     |        |        |        |      |
| ATOM       | 425 | HB   | THR | 32  | 9.934  | -0.847 | 28.480 | 1.00 |
| 84.25      |     |      | H   |     |        |        |        |      |
| ATOM       | 426 | HG1  | THR | 32  | 10.076 | 1.903  | 27.800 |      |
| 1.00205.03 |     |      |     | H   |        |        |        |      |
| ATOM       | 427 | HG21 | THR | 32  | 8.572  | -0.142 | 30.329 |      |
| 1.00220.71 |     |      |     | H   |        |        |        |      |

|            |     |      |     |    |        |        |        |      |
|------------|-----|------|-----|----|--------|--------|--------|------|
| ATOM       | 428 | HG22 | THR | 32 | 7.852  | 0.538  | 28.870 |      |
| 1.00174.67 |     |      |     |    |        |        |        | H    |
| ATOM       | 429 | HG23 | THR | 32 | 8.819  | 1.559  | 29.935 |      |
| 1.00217.44 |     |      |     |    |        |        |        | H    |
| ATOM       | 430 | N    | THR | 33 | 11.048 | 0.397  | 32.008 | 1.00 |
| 22.47      |     |      | N   |    |        |        |        |      |
| ATOM       | 431 | CA   | THR | 33 | 10.954 | -0.249 | 33.318 | 1.00 |
| 41.60      |     |      | C   |    |        |        |        |      |
| ATOM       | 432 | C    | THR | 33 | 10.131 | 0.580  | 34.263 | 1.00 |
| 38.03      |     |      | C   |    |        |        |        |      |
| ATOM       | 433 | O    | THR | 33 | 10.653 | 1.351  | 35.069 | 1.00 |
| 52.73      |     |      | O   |    |        |        |        |      |
| ATOM       | 434 | CB   | THR | 33 | 12.343 | -0.475 | 33.908 | 1.00 |
| 63.25      |     |      | C   |    |        |        |        |      |
| ATOM       | 435 | CG2  | THR | 33 | 13.075 | -1.549 | 33.102 |      |
| 1.00121.65 |     |      |     |    |        |        |        | C    |
| ATOM       | 436 | OG1  | THR | 33 | 13.080 | 0.739  | 33.868 | 1.00 |
| 96.20      |     |      | O   |    |        |        |        |      |
| ATOM       | 437 | HN   | THR | 33 | 11.050 | 1.375  | 31.956 | 1.00 |
| 23.82      |     |      | H   |    |        |        |        |      |
| ATOM       | 438 | HA   | THR | 33 | 10.457 | -1.195 | 33.219 | 1.00 |
| 67.12      |     |      | H   |    |        |        |        |      |
| ATOM       | 439 | HB   | THR | 33 | 12.242 | -0.804 | 34.929 |      |
| 1.00107.59 |     |      |     |    |        |        |        | H    |
| ATOM       | 440 | HG1  | THR | 33 | 12.484 | 1.438  | 33.590 |      |
| 1.00176.27 |     |      |     |    |        |        |        | H    |
| ATOM       | 441 | HG21 | THR | 33 | 13.276 | -1.178 | 32.108 |      |
| 1.00255.23 |     |      |     |    |        |        |        | H    |
| ATOM       | 442 | HG22 | THR | 33 | 12.460 | -2.435 | 33.040 |      |
| 1.00245.37 |     |      |     |    |        |        |        | H    |
| ATOM       | 443 | HG23 | THR | 33 | 14.008 | -1.792 | 33.590 |      |
| 1.00185.78 |     |      |     |    |        |        |        | H    |
| ATOM       | 444 | N    | GLY | 34 | 8.830  | 0.389  | 34.169 | 1.00 |
| 40.93      |     |      | N   |    |        |        |        |      |
| ATOM       | 445 | CA   | GLY | 34 | 7.910  | 1.093  | 35.028 | 1.00 |
| 45.59      |     |      | C   |    |        |        |        |      |
| ATOM       | 446 | C    | GLY | 34 | 7.696  | 2.521  | 34.541 | 1.00 |
| 40.97      |     |      | C   |    |        |        |        |      |
| ATOM       | 447 | O    | GLY | 34 | 6.863  | 3.254  | 35.074 | 1.00 |
| 82.17      |     |      | O   |    |        |        |        |      |
| ATOM       | 448 | HN   | GLY | 34 | 8.487  | -0.255 | 33.518 | 1.00 |
| 54.00      |     |      | H   |    |        |        |        |      |
| ATOM       | 449 | HA1  | GLY | 34 | 8.327  | 1.109  | 36.016 | 1.00 |
| 54.41      |     |      | H   |    |        |        |        |      |
| ATOM       | 450 | HA2  | GLY | 34 | 6.964  | 0.571  | 35.044 | 1.00 |
| 62.09      |     |      | H   |    |        |        |        |      |
| ATOM       | 451 | N    | ASN | 35 | 8.454  | 2.903  | 33.517 | 1.00 |
| 32.51      |     |      | N   |    |        |        |        |      |
| ATOM       | 452 | CA   | ASN | 35 | 8.349  | 4.240  | 32.944 | 1.00 |
| 33.20      |     |      | C   |    |        |        |        |      |
| ATOM       | 453 | C    | ASN | 35 | 8.836  | 4.231  | 31.498 | 1.00 |
| 23.17      |     |      | C   |    |        |        |        |      |

|            |     |      |     |    |        |       |        |      |
|------------|-----|------|-----|----|--------|-------|--------|------|
| ATOM       | 454 | O    | ASN | 35 | 9.685  | 3.421 | 31.127 | 1.00 |
| 27.01      |     |      | O   |    |        |       |        |      |
| ATOM       | 455 | CB   | ASN | 35 | 9.186  | 5.231 | 33.755 | 1.00 |
| 54.51      |     |      | C   |    |        |       |        |      |
| ATOM       | 456 | CG   | ASN | 35 | 8.710  | 5.256 | 35.203 | 1.00 |
| 80.73      |     |      | C   |    |        |       |        |      |
| ATOM       | 457 | ND2  | ASN | 35 | 9.565  | 5.034 | 36.163 |      |
| 1.00220.46 |     |      |     |    |        |       |        | N    |
| ATOM       | 458 | OD1  | ASN | 35 | 7.528  | 5.483 | 35.467 |      |
| 1.00117.80 |     |      |     |    |        |       |        | O    |
| ATOM       | 459 | HN   | ASN | 35 | 9.095  | 2.268 | 33.134 | 1.00 |
| 51.15      |     |      | H   |    |        |       |        |      |
| ATOM       | 460 | HA   | ASN | 35 | 7.316  | 4.555 | 32.962 | 1.00 |
| 47.21      |     |      | H   |    |        |       |        |      |
| ATOM       | 461 | HB1  | ASN | 35 | 9.082  | 6.218 | 33.329 | 1.00 |
| 68.31      |     |      | H   |    |        |       |        |      |
| ATOM       | 462 | HB2  | ASN | 35 | 10.223 | 4.934 | 33.723 | 1.00 |
| 57.75      |     |      | H   |    |        |       |        |      |
| ATOM       | 463 | HD21 | ASN | 35 | 10.503 | 4.853 | 35.950 |      |
| 1.00405.39 |     |      |     |    |        |       |        | H    |
| ATOM       | 464 | HD22 | ASN | 35 | 9.267  | 5.047 | 37.097 |      |
| 1.00245.64 |     |      |     |    |        |       |        | H    |
| ATOM       | 465 | N    | PHE | 36 | 8.290  | 5.130 | 30.684 | 1.00 |
| 35.72      |     |      | N   |    |        |       |        |      |
| ATOM       | 466 | CA   | PHE | 36 | 8.663  | 5.221 | 29.282 | 1.00 |
| 33.41      |     |      | C   |    |        |       |        |      |
| ATOM       | 467 | C    | PHE | 36 | 9.649  | 6.361 | 29.052 | 1.00 |
| 28.51      |     |      | C   |    |        |       |        |      |
| ATOM       | 468 | O    | PHE | 36 | 9.530  | 7.430 | 29.653 | 1.00 |
| 45.23      |     |      | O   |    |        |       |        |      |
| ATOM       | 469 | CB   | PHE | 36 | 7.405  | 5.457 | 28.458 | 1.00 |
| 67.53      |     |      | C   |    |        |       |        |      |
| ATOM       | 470 | CG   | PHE | 36 | 6.515  | 4.242 | 28.552 | 1.00 |
| 86.71      |     |      | C   |    |        |       |        |      |
| ATOM       | 471 | CD1  | PHE | 36 | 5.503  | 4.192 | 29.517 |      |
| 1.00106.51 |     |      |     |    |        |       |        | C    |
| ATOM       | 472 | CD2  | PHE | 36 | 6.702  | 3.166 | 27.677 | 1.00 |
| 99.48      |     |      | C   |    |        |       |        |      |
| ATOM       | 473 | CE1  | PHE | 36 | 4.676  | 3.066 | 29.606 |      |
| 1.00134.48 |     |      |     |    |        |       |        | C    |
| ATOM       | 474 | CE2  | PHE | 36 | 5.875  | 2.040 | 27.765 |      |
| 1.00134.27 |     |      |     |    |        |       |        | C    |
| ATOM       | 475 | CZ   | PHE | 36 | 4.860  | 1.990 | 28.730 |      |
| 1.00149.48 |     |      |     |    |        |       |        | C    |
| ATOM       | 476 | HN   | PHE | 36 | 7.614  | 5.745 | 31.028 | 1.00 |
| 62.87      |     |      | H   |    |        |       |        |      |
| ATOM       | 477 | HA   | PHE | 36 | 9.117  | 4.292 | 28.962 | 1.00 |
| 28.53      |     |      | H   |    |        |       |        |      |
| ATOM       | 478 | HB1  | PHE | 36 | 7.675  | 5.628 | 27.437 | 1.00 |
| 73.56      |     |      | H   |    |        |       |        |      |
| ATOM       | 479 | HB2  | PHE | 36 | 6.880  | 6.319 | 28.844 | 1.00 |
| 88.42      |     |      | H   |    |        |       |        |      |

|            |     |      |     |    |        |       |        |      |
|------------|-----|------|-----|----|--------|-------|--------|------|
| ATOM       | 480 | HD1  | PHE | 36 | 5.361  | 5.022 | 30.195 |      |
| 1.00110.20 |     |      | H   |    |        |       |        |      |
| ATOM       | 481 | HD2  | PHE | 36 | 7.486  | 3.204 | 26.934 | 1.00 |
| 93.07      |     |      | H   |    |        |       |        |      |
| ATOM       | 482 | HE1  | PHE | 36 | 3.895  | 3.028 | 30.351 |      |
| 1.00155.06 |     |      | H   |    |        |       |        |      |
| ATOM       | 483 | HE2  | PHE | 36 | 6.018  | 1.210 | 27.089 |      |
| 1.00159.46 |     |      | H   |    |        |       |        |      |
| ATOM       | 484 | HZ   | PHE | 36 | 4.223  | 1.122 | 28.798 |      |
| 1.00183.25 |     |      | H   |    |        |       |        |      |
| ATOM       | 485 | N    | THR | 37 | 10.619 | 6.128 | 28.173 | 1.00 |
| 20.06      |     |      | N   |    |        |       |        |      |
| ATOM       | 486 | CA   | THR | 37 | 11.618 | 7.133 | 27.862 | 1.00 |
| 27.18      |     |      | C   |    |        |       |        |      |
| ATOM       | 487 | C    | THR | 37 | 12.299 | 6.794 | 26.541 | 1.00 |
| 41.87      |     |      | C   |    |        |       |        |      |
| ATOM       | 488 | O    | THR | 37 | 12.729 | 5.661 | 26.326 |      |
| 1.00169.86 |     |      | O   |    |        |       |        |      |
| ATOM       | 489 | CB   | THR | 37 | 12.661 | 7.204 | 28.979 | 1.00 |
| 26.52      |     |      | C   |    |        |       |        |      |
| ATOM       | 490 | CG2  | THR | 37 | 13.420 | 5.880 | 29.057 | 1.00 |
| 75.69      |     |      | C   |    |        |       |        |      |
| ATOM       | 491 | OG1  | THR | 37 | 13.570 | 8.261 | 28.708 | 1.00 |
| 81.95      |     |      | O   |    |        |       |        |      |
| ATOM       | 492 | HN   | THR | 37 | 10.659 | 5.263 | 27.720 | 1.00 |
| 18.47      |     |      | H   |    |        |       |        |      |
| ATOM       | 493 | HA   | THR | 37 | 11.135 | 8.094 | 27.771 | 1.00 |
| 38.80      |     |      | H   |    |        |       |        |      |
| ATOM       | 494 | HB   | THR | 37 | 12.167 | 7.387 | 29.921 | 1.00 |
| 81.60      |     |      | H   |    |        |       |        |      |
| ATOM       | 495 | HG1  | THR | 37 | 13.071 | 9.080 | 28.668 |      |
| 1.00188.80 |     |      | H   |    |        |       |        |      |
| ATOM       | 496 | HG21 | THR | 37 | 12.722 | 5.059 | 29.001 |      |
| 1.00196.98 |     |      | H   |    |        |       |        |      |
| ATOM       | 497 | HG22 | THR | 37 | 13.961 | 5.829 | 29.991 |      |
| 1.00196.23 |     |      | H   |    |        |       |        |      |
| ATOM       | 498 | HG23 | THR | 37 | 14.118 | 5.817 | 28.236 |      |
| 1.00168.92 |     |      | H   |    |        |       |        |      |
| ATOM       | 499 | N    | GLU | 38 | 12.378 | 7.781 | 25.663 | 1.00 |
| 26.53      |     |      | N   |    |        |       |        |      |
| ATOM       | 500 | CA   | GLU | 38 | 12.999 | 7.597 | 24.351 | 1.00 |
| 30.29      |     |      | C   |    |        |       |        |      |
| ATOM       | 501 | C    | GLU | 38 | 14.508 | 7.824 | 24.422 | 1.00 |
| 25.39      |     |      | C   |    |        |       |        |      |
| ATOM       | 502 | O    | GLU | 38 | 15.029 | 8.306 | 25.427 | 1.00 |
| 51.60      |     |      | O   |    |        |       |        |      |
| ATOM       | 503 | CB   | GLU | 38 | 12.387 | 8.573 | 23.346 | 1.00 |
| 54.82      |     |      | C   |    |        |       |        |      |
| ATOM       | 504 | CG   | GLU | 38 | 10.934 | 8.183 | 23.074 |      |
| 1.00165.84 |     |      | C   |    |        |       |        |      |
| ATOM       | 505 | CD   | GLU | 38 | 10.275 | 9.219 | 22.170 |      |
| 1.00292.92 |     |      | C   |    |        |       |        |      |

|         |     |     |     |    |        |        |        |      |
|---------|-----|-----|-----|----|--------|--------|--------|------|
| ATOM    | 506 | OE1 | GLU | 38 | 9.174  | 8.963  | 21.712 |      |
| 1.00414 | .19 |     | O   |    |        |        |        |      |
| ATOM    | 507 | OE2 | GLU | 38 | 10.881 | 10.254 | 21.950 |      |
| 1.00537 | .65 |     | O1- |    |        |        |        |      |
| ATOM    | 508 | HN  | GLU | 38 | 12.004 | 8.651  | 25.898 | 1.00 |
| 84.50   |     |     | H   |    |        |        |        |      |
| ATOM    | 509 | HA  | GLU | 38 | 12.814 | 6.588  | 24.010 | 1.00 |
| 32.15   |     |     | H   |    |        |        |        |      |
| ATOM    | 510 | HB1 | GLU | 38 | 12.945 | 8.538  | 22.422 |      |
| 1.00144 | .82 |     | H   |    |        |        |        |      |
| ATOM    | 511 | HB2 | GLU | 38 | 12.422 | 9.575  | 23.749 |      |
| 1.00106 | .49 |     | H   |    |        |        |        |      |
| ATOM    | 512 | HG1 | GLU | 38 | 10.396 | 8.130  | 24.009 |      |
| 1.00303 | .31 |     | H   |    |        |        |        |      |
| ATOM    | 513 | HG2 | GLU | 38 | 10.907 | 7.216  | 22.590 |      |
| 1.00323 | .99 |     | H   |    |        |        |        |      |
| ATOM    | 514 | N   | CYS | 39 | 15.201 | 7.475  | 23.340 | 1.00 |
| 15.84   |     |     | N   |    |        |        |        |      |
| ATOM    | 515 | CA  | CYS | 39 | 16.649 | 7.644  | 23.272 | 1.00 |
| 14.30   |     |     | C   |    |        |        |        |      |
| ATOM    | 516 | C   | CYS | 39 | 17.014 | 9.118  | 23.477 | 1.00 |
| 22.31   |     |     | C   |    |        |        |        |      |
| ATOM    | 517 | O   | CYS | 39 | 16.213 | 10.001 | 23.166 | 1.00 |
| 32.92   |     |     | O   |    |        |        |        |      |
| ATOM    | 518 | CB  | CYS | 39 | 17.150 | 7.166  | 21.906 | 1.00 |
| 18.08   |     |     | C   |    |        |        |        |      |
| ATOM    | 519 | SG  | CYS | 39 | 16.028 | 7.758  | 20.614 | 1.00 |
| 17.41   |     |     | S   |    |        |        |        |      |
| ATOM    | 520 | HN  | CYS | 39 | 14.727 | 7.101  | 22.569 | 1.00 |
| 24.87   |     |     | H   |    |        |        |        |      |
| ATOM    | 521 | HA  | CYS | 39 | 17.106 | 7.045  | 24.042 | 1.00 |
| 14.60   |     |     | H   |    |        |        |        |      |
| ATOM    | 522 | HB1 | CYS | 39 | 17.180 | 6.087  | 21.890 | 1.00 |
| 27.71   |     |     | H   |    |        |        |        |      |
| ATOM    | 523 | HB2 | CYS | 39 | 18.141 | 7.555  | 21.724 | 1.00 |
| 34.91   |     |     | H   |    |        |        |        |      |
| ATOM    | 524 | N   | PRO | 40 | 18.187 | 9.412  | 23.993 | 1.00 |
| 27.27   |     |     | N   |    |        |        |        |      |
| ATOM    | 525 | CA  | PRO | 40 | 18.617 | 10.820 | 24.233 | 1.00 |
| 47.66   |     |     | C   |    |        |        |        |      |
| ATOM    | 526 | C   | PRO | 40 | 19.024 | 11.524 | 22.941 | 1.00 |
| 71.54   |     |     | C   |    |        |        |        |      |
| ATOM    | 527 | O   | PRO | 40 | 19.752 | 10.967 | 22.119 | 1.00 |
| 87.70   |     |     | O   |    |        |        |        |      |
| ATOM    | 528 | CB  | PRO | 40 | 19.808 | 10.664 | 25.186 | 1.00 |
| 53.85   |     |     | C   |    |        |        |        |      |
| ATOM    | 529 | CG  | PRO | 40 | 20.407 | 9.346  | 24.819 | 1.00 |
| 46.04   |     |     | C   |    |        |        |        |      |
| ATOM    | 530 | CD  | PRO | 40 | 19.233 | 8.453  | 24.401 | 1.00 |
| 25.70   |     |     | C   |    |        |        |        |      |
| ATOM    | 531 | HA  | PRO | 40 | 17.832 | 11.371 | 24.725 | 1.00 |
| 58.04   |     |     | H   |    |        |        |        |      |

|            |     |     |     |    |        |        |        |      |
|------------|-----|-----|-----|----|--------|--------|--------|------|
| ATOM       | 532 | HB1 | PRO | 40 | 19.471 | 10.645 | 26.212 | 1.00 |
| 67.93      |     | H   |     |    |        |        |        |      |
| ATOM       | 533 | HB2 | PRO | 40 | 20.524 | 11.466 | 25.039 | 1.00 |
| 70.99      |     | H   |     |    |        |        |        |      |
| ATOM       | 534 | HG1 | PRO | 40 | 20.914 | 8.912  | 25.669 | 1.00 |
| 65.91      |     | H   |     |    |        |        |        |      |
| ATOM       | 535 | HG2 | PRO | 40 | 21.099 | 9.471  | 23.995 | 1.00 |
| 54.99      |     | H   |     |    |        |        |        |      |
| ATOM       | 536 | HD1 | PRO | 40 | 18.892 | 7.858  | 25.233 | 1.00 |
| 24.22      |     | H   |     |    |        |        |        |      |
| ATOM       | 537 | HD2 | PRO | 40 | 19.516 | 7.823  | 23.572 | 1.00 |
| 26.94      |     | H   |     |    |        |        |        |      |
| ATOM       | 538 | N   | GLY | 41 | 18.553 | 12.753 | 22.778 |      |
| 1.00105.24 |     |     | N   |    |        |        |        |      |
| ATOM       | 539 | CA  | GLY | 41 | 18.875 | 13.536 | 21.589 |      |
| 1.00147.55 |     |     | C   |    |        |        |        |      |
| ATOM       | 540 | C   | GLY | 41 | 20.368 | 13.829 | 21.519 |      |
| 1.00161.74 |     |     | C   |    |        |        |        |      |
| ATOM       | 541 | O   | GLY | 41 | 20.970 | 13.795 | 20.447 |      |
| 1.00244.37 |     |     | O   |    |        |        |        |      |
| ATOM       | 542 | HN  | GLY | 41 | 17.983 | 13.141 | 23.471 |      |
| 1.00121.79 |     |     | H   |    |        |        |        |      |
| ATOM       | 543 | HA1 | GLY | 41 | 18.333 | 14.469 | 21.621 |      |
| 1.00184.40 |     |     | H   |    |        |        |        |      |
| ATOM       | 544 | HA2 | GLY | 41 | 18.581 | 12.983 | 20.712 |      |
| 1.00157.34 |     |     | H   |    |        |        |        |      |
| ATOM       | 545 | N   | LEU | 42 | 20.956 | 14.126 | 22.676 |      |
| 1.00162.48 |     |     | N   |    |        |        |        |      |
| ATOM       | 546 | CA  | LEU | 42 | 22.386 | 14.436 | 22.760 |      |
| 1.00191.48 |     |     | C   |    |        |        |        |      |
| ATOM       | 547 | C   | LEU | 42 | 23.132 | 13.319 | 23.482 |      |
| 1.00166.66 |     |     | C   |    |        |        |        |      |
| ATOM       | 548 | O   | LEU | 42 | 22.630 | 12.743 | 24.448 |      |
| 1.00251.38 |     |     | O   |    |        |        |        |      |
| ATOM       | 549 | CB  | LEU | 42 | 22.587 | 15.746 | 23.526 |      |
| 1.00307.99 |     |     | C   |    |        |        |        |      |
| ATOM       | 550 | CG  | LEU | 42 | 21.784 | 16.871 | 22.861 |      |
| 1.00452.28 |     |     | C   |    |        |        |        |      |
| ATOM       | 551 | CD1 | LEU | 42 | 21.937 | 18.152 | 23.686 |      |
| 1.00681.24 |     |     | C   |    |        |        |        |      |
| ATOM       | 552 | CD2 | LEU | 42 | 22.301 | 17.115 | 21.433 |      |
| 1.00527.46 |     |     | C   |    |        |        |        |      |
| ATOM       | 553 | HN  | LEU | 42 | 20.415 | 14.139 | 23.492 |      |
| 1.00195.47 |     |     | H   |    |        |        |        |      |
| ATOM       | 554 | HA  | LEU | 42 | 22.798 | 14.543 | 21.767 |      |
| 1.00229.77 |     |     | H   |    |        |        |        |      |
| ATOM       | 555 | HB1 | LEU | 42 | 23.635 | 16.005 | 23.521 |      |
| 1.00342.49 |     |     | H   |    |        |        |        |      |
| ATOM       | 556 | HB2 | LEU | 42 | 22.254 | 15.621 | 24.546 |      |
| 1.00335.33 |     |     | H   |    |        |        |        |      |
| ATOM       | 557 | HG  | LEU | 42 | 20.741 | 16.592 | 22.825 |      |
| 1.00427.79 |     |     | H   |    |        |        |        |      |

|            |     |      |     |    |        |        |        |
|------------|-----|------|-----|----|--------|--------|--------|
| ATOM       | 558 | HD11 | LEU | 42 | 21.665 | 17.954 | 24.712 |
| 1.00909.71 |     |      |     | H  |        |        |        |
| ATOM       | 559 | HD12 | LEU | 42 | 21.291 | 18.918 | 23.284 |
| 1.00706.80 |     |      |     | H  |        |        |        |
| ATOM       | 560 | HD13 | LEU | 42 | 22.962 | 18.487 | 23.645 |
| 1.00858.82 |     |      |     | H  |        |        |        |
| ATOM       | 561 | HD21 | LEU | 42 | 21.854 | 16.398 | 20.761 |
| 1.00631.69 |     |      |     | H  |        |        |        |
| ATOM       | 562 | HD22 | LEU | 42 | 23.376 | 17.008 | 21.410 |
| 1.00628.06 |     |      |     | H  |        |        |        |
| ATOM       | 563 | HD23 | LEU | 42 | 22.035 | 18.113 | 21.115 |
| 1.00656.75 |     |      |     | H  |        |        |        |
| ATOM       | 564 | N    | THR | 43 | 24.338 | 13.026 | 23.010 |
| 1.00178.52 |     |      |     | N  |        |        |        |
| ATOM       | 565 | CA   | THR | 43 | 25.155 | 11.983 | 23.617 |
| 1.00240.84 |     |      |     | C  |        |        |        |
| ATOM       | 566 | C    | THR | 43 | 25.644 | 12.433 | 25.000 |
| 1.00372.31 |     |      |     | C  |        |        |        |
| ATOM       | 567 | O    | THR | 43 | 25.812 | 13.629 | 25.237 |
| 1.00500.13 |     |      |     | O  |        |        |        |
| ATOM       | 568 | CB   | THR | 43 | 26.346 | 11.681 | 22.703 |
| 1.00354.13 |     |      |     | C  |        |        |        |
| ATOM       | 569 | CG2  | THR | 43 | 25.859 | 10.941 | 21.457 |
| 1.00463.04 |     |      |     | C  |        |        |        |
| ATOM       | 570 | OG1  | THR | 43 | 26.964 | 12.902 | 22.319 |
| 1.00508.50 |     |      |     | O  |        |        |        |
| ATOM       | 571 | HN   | THR | 43 | 24.687 | 13.522 | 22.241 |
| 1.00229.59 |     |      |     | H  |        |        |        |
| ATOM       | 572 | HA   | THR | 43 | 24.557 | 11.092 | 23.717 |
| 1.00249.90 |     |      |     | H  |        |        |        |
| ATOM       | 573 | HB   | THR | 43 | 27.058 | 11.066 | 23.227 |
| 1.00481.58 |     |      |     | H  |        |        |        |
| ATOM       | 574 | HG1  | THR | 43 | 27.439 | 12.749 | 21.501 |
| 1.00624.31 |     |      |     | H  |        |        |        |
| ATOM       | 575 | HG21 | THR | 43 | 26.690 | 10.778 | 20.787 |
| 1.00650.95 |     |      |     | H  |        |        |        |
| ATOM       | 576 | HG22 | THR | 43 | 25.104 | 11.531 | 20.958 |
| 1.00580.73 |     |      |     | H  |        |        |        |
| ATOM       | 577 | HG23 | THR | 43 | 25.438 | 9.988  | 21.746 |
| 1.00571.99 |     |      |     | H  |        |        |        |
| ATOM       | 578 | N    | PRO | 44 | 25.863 | 11.517 | 25.923 |
| 1.00488.39 |     |      |     | N  |        |        |        |
| ATOM       | 579 | CA   | PRO | 44 | 26.324 | 11.863 | 27.303 |
| 1.00760.13 |     |      |     | C  |        |        |        |
| ATOM       | 580 | C    | PRO | 44 | 27.802 | 12.251 | 27.353 |
| 1.00735.36 |     |      |     | C  |        |        |        |
| ATOM       | 581 | O    | PRO | 44 | 28.275 | 12.781 | 28.359 |
| 1.00999.99 |     |      |     | O  |        |        |        |
| ATOM       | 582 | CB   | PRO | 44 | 26.061 | 10.574 | 28.093 |
| 1.00999.99 |     |      |     | C  |        |        |        |
| ATOM       | 583 | CG   | PRO | 44 | 26.224 | 9.485  | 27.086 |
| 1.00856.94 |     |      |     | C  |        |        |        |

|            |     |      |     |    |        |        |        |
|------------|-----|------|-----|----|--------|--------|--------|
| ATOM       | 584 | CD   | PRO | 44 | 25.706 | 10.055 | 25.761 |
| 1.00548.09 |     |      |     | C  |        |        |        |
| ATOM       | 585 | HA   | PRO | 44 | 25.719 | 12.660 | 27.706 |
| 1.00939.00 |     |      |     | H  |        |        |        |
| ATOM       | 586 | HB1  | PRO | 44 | 25.053 | 10.570 | 28.480 |
| 1.00999.99 |     |      |     | H  |        |        |        |
| ATOM       | 587 | HB2  | PRO | 44 | 26.777 | 10.466 | 28.898 |
| 1.00999.99 |     |      |     | H  |        |        |        |
| ATOM       | 588 | HG1  | PRO | 44 | 25.642 | 8.620  | 27.367 |
| 1.00999.99 |     |      |     | H  |        |        |        |
| ATOM       | 589 | HG2  | PRO | 44 | 27.271 | 9.216  | 26.998 |
| 1.00853.53 |     |      |     | H  |        |        |        |
| ATOM       | 590 | HD1  | PRO | 44 | 24.665 | 9.804  | 25.623 |
| 1.00602.45 |     |      |     | H  |        |        |        |
| ATOM       | 591 | HD2  | PRO | 44 | 26.301 | 9.693  | 24.937 |
| 1.00463.32 |     |      |     | H  |        |        |        |
| ATOM       | 592 | N    | ILE | 45 | 28.529 | 11.977 | 26.276 |
| 1.00518.33 |     |      |     | N  |        |        |        |
| ATOM       | 593 | CA   | ILE | 45 | 29.945 | 12.295 | 26.231 |
| 1.00582.79 |     |      |     | C  |        |        |        |
| ATOM       | 594 | C    | ILE | 45 | 30.179 | 13.764 | 26.571 |
| 1.00795.93 |     |      |     | C  |        |        |        |
| ATOM       | 595 | O    | ILE | 45 | 31.268 | 14.146 | 26.998 |
| 1.00898.75 |     |      |     | O  |        |        |        |
| ATOM       | 596 | CB   | ILE | 45 | 30.495 | 11.987 | 24.839 |
| 1.00474.41 |     |      |     | C  |        |        |        |
| ATOM       | 597 | CG1  | ILE | 45 | 29.768 | 12.836 | 23.794 |
| 1.00516.90 |     |      |     | C  |        |        |        |
| ATOM       | 598 | CG2  | ILE | 45 | 30.286 | 10.504 | 24.525 |
| 1.00760.75 |     |      |     | C  |        |        |        |
| ATOM       | 599 | CD1  | ILE | 45 | 30.333 | 12.537 | 22.405 |
| 1.00566.81 |     |      |     | C  |        |        |        |
| ATOM       | 600 | HN   | ILE | 45 | 28.111 | 11.548 | 25.502 |
| 1.00395.72 |     |      |     | H  |        |        |        |
| ATOM       | 601 | HA   | ILE | 45 | 30.460 | 11.682 | 26.951 |
| 1.00711.06 |     |      |     | H  |        |        |        |
| ATOM       | 602 | HB   | ILE | 45 | 31.547 | 12.210 | 24.818 |
| 1.00477.81 |     |      |     | H  |        |        |        |
| ATOM       | 603 | HG11 | ILE | 45 | 29.909 | 13.884 | 24.014 |
| 1.00624.28 |     |      |     | H  |        |        |        |
| ATOM       | 604 | HG12 | ILE | 45 | 28.717 | 12.604 | 23.815 |
| 1.00744.84 |     |      |     | H  |        |        |        |
| ATOM       | 605 | HG21 | ILE | 45 | 30.815 | 10.251 | 23.619 |
| 1.00920.57 |     |      |     | H  |        |        |        |
| ATOM       | 606 | HG22 | ILE | 45 | 29.232 | 10.310 | 24.394 |
| 1.00999.99 |     |      |     | H  |        |        |        |
| ATOM       | 607 | HG23 | ILE | 45 | 30.663 | 9.906  | 25.342 |
| 1.00865.46 |     |      |     | H  |        |        |        |
| ATOM       | 608 | HD11 | ILE | 45 | 29.950 | 13.258 | 21.698 |
| 1.00658.89 |     |      |     | H  |        |        |        |
| ATOM       | 609 | HD12 | ILE | 45 | 30.038 | 11.543 | 22.101 |
| 1.00734.30 |     |      |     | H  |        |        |        |



|            |     |      |     |    |        |        |        |
|------------|-----|------|-----|----|--------|--------|--------|
| ATOM       | 610 | HD13 | ILE | 45 | 31.411 | 12.599 | 22.433 |
| 1.00675.84 |     |      | H   |    |        |        |        |
| ATOM       | 611 | N    | ALA | 46 | 29.148 | 14.581 | 26.377 |
| 1.00999.99 |     |      | N   |    |        |        |        |
| ATOM       | 612 | CA   | ALA | 46 | 29.248 | 16.006 | 26.667 |
| 1.00999.99 |     |      | C   |    |        |        |        |
| ATOM       | 613 | C    | ALA | 46 | 29.791 | 16.232 | 28.074 |
| 1.00999.99 |     |      | C   |    |        |        |        |
| ATOM       | 614 | CB   | ALA | 46 | 27.874 | 16.662 | 26.538 |
| 1.00999.99 |     |      | C   |    |        |        |        |
| ATOM       | 615 | OT1  | ALA | 46 | 30.099 | 15.254 | 28.733 |
| 1.00999.99 |     |      | O   |    |        |        |        |
| ATOM       | 616 | OT2  | ALA | 46 | 29.886 | 17.382 | 28.474 |
| 1.00999.99 |     |      | O   |    |        |        |        |
| ATOM       | 617 | HN   | ALA | 46 | 28.305 | 14.217 | 26.034 |
| 1.00999.99 |     |      | H   |    |        |        |        |
| ATOM       | 618 | HA   | ALA | 46 | 29.919 | 16.462 | 25.953 |
| 1.00999.99 |     |      | H   |    |        |        |        |
| ATOM       | 619 | HB1  | ALA | 46 | 27.582 | 16.692 | 25.499 |
| 1.00999.99 |     |      | H   |    |        |        |        |
| ATOM       | 620 | HB2  | ALA | 46 | 27.916 | 17.668 | 26.930 |
| 1.00999.99 |     |      | H   |    |        |        |        |
| ATOM       | 621 | HB3  | ALA | 46 | 27.149 | 16.089 | 27.099 |
| 1.00999.99 |     |      | H   |    |        |        |        |
| ENDMDL     |     |      |     |    |        |        |        |
| TER        |     |      |     |    |        |        |        |
| MODEL      | 10  |      |     |    |        |        |        |
| ATOM       | 1   | N    | GLY | 1  | 27.510 | -3.058 | 16.368 |
| 1.00999.99 |     |      | N   |    |        |        |        |
| ATOM       | 2   | CA   | GLY | 1  | 26.501 | -2.714 | 17.410 |
| 1.00999.99 |     |      | C   |    |        |        |        |
| ATOM       | 3   | C    | GLY | 1  | 25.561 | -1.641 | 16.875 |
| 1.00999.99 |     |      | C   |    |        |        |        |
| ATOM       | 4   | O    | GLY | 1  | 25.109 | -0.770 | 17.619 |
| 1.00999.99 |     |      | O   |    |        |        |        |
| ATOM       | 5   | HA1  | GLY | 1  | 27.005 | -2.340 | 18.289 |
| 1.00999.99 |     |      | H   |    |        |        |        |
| ATOM       | 6   | HA2  | GLY | 1  | 25.934 | -3.597 | 17.666 |
| 1.00999.99 |     |      | H   |    |        |        |        |
| ATOM       | 7   | HT1  | GLY | 1  | 28.021 | -3.919 | 16.650 |
| 1.00999.99 |     |      | H   |    |        |        |        |
| ATOM       | 8   | HT2  | GLY | 1  | 28.184 | -2.273 | 16.263 |
| 1.00999.99 |     |      | H   |    |        |        |        |
| ATOM       | 9   | HT3  | GLY | 1  | 27.030 | -3.226 | 15.462 |
| 1.00999.99 |     |      | H   |    |        |        |        |
| ATOM       | 10  | N    | LEU | 2  | 25.268 | -1.710 | 15.580 |
| 1.00999.99 |     |      | N   |    |        |        |        |
| ATOM       | 11  | CA   | LEU | 2  | 24.377 | -0.738 | 14.956 |
| 1.00895.59 |     |      | C   |    |        |        |        |
| ATOM       | 12  | C    | LEU | 2  | 22.926 | -1.041 | 15.313 |
| 1.00532.27 |     |      | C   |    |        |        |        |
| ATOM       | 13  | O    | LEU | 2  | 22.542 | -2.202 | 15.454 |

|            |    |      |     |   |   |        |        |        |      |  |
|------------|----|------|-----|---|---|--------|--------|--------|------|--|
| 1.00625.21 |    |      |     | O |   |        |        |        |      |  |
| ATOM       | 14 | CB   | LEU |   | 2 | 24.543 | -0.778 | 13.434 |      |  |
| 1.00999.99 |    |      |     | C |   |        |        |        |      |  |
| ATOM       | 15 | CG   | LEU |   | 2 | 26.003 | -0.497 | 13.054 |      |  |
| 1.00999.99 |    |      |     | C |   |        |        |        |      |  |
| ATOM       | 16 | CD1  | LEU |   | 2 | 26.158 | -0.625 | 11.536 |      |  |
| 1.00999.99 |    |      |     | C |   |        |        |        |      |  |
| ATOM       | 17 | CD2  | LEU |   | 2 | 26.402 | 0.922  | 13.496 |      |  |
| 1.00999.99 |    |      |     | C |   |        |        |        |      |  |
| ATOM       | 18 | HN   | LEU |   | 2 | 25.657 | -2.426 | 15.035 |      |  |
| 1.00999.99 |    |      |     | H |   |        |        |        |      |  |
| ATOM       | 19 | HA   | LEU |   | 2 | 24.626 | 0.250  | 15.311 |      |  |
| 1.00890.87 |    |      |     | H |   |        |        |        |      |  |
| ATOM       | 20 | HB1  | LEU |   | 2 | 23.909 | -0.029 | 12.984 |      |  |
| 1.00924.07 |    |      |     | H |   |        |        |        |      |  |
| ATOM       | 21 | HB2  | LEU |   | 2 | 24.259 | -1.753 | 13.068 |      |  |
| 1.00999.99 |    |      |     | H |   |        |        |        |      |  |
| ATOM       | 22 | HG   | LEU |   | 2 | 26.643 | -1.221 | 13.540 |      |  |
| 1.00999.99 |    |      |     | H |   |        |        |        |      |  |
| ATOM       | 23 | HD11 | LEU |   | 2 | 25.531 | 0.105  | 11.046 |      |  |
| 1.00999.99 |    |      |     | H |   |        |        |        |      |  |
| ATOM       | 24 | HD12 | LEU |   | 2 | 25.863 | -1.618 | 11.227 |      |  |
| 1.00999.99 |    |      |     | H |   |        |        |        |      |  |
| ATOM       | 25 | HD13 | LEU |   | 2 | 27.189 | -0.456 | 11.264 |      |  |
| 1.00999.99 |    |      |     | H |   |        |        |        |      |  |
| ATOM       | 26 | HD21 | LEU |   | 2 | 26.704 | 0.905  | 14.533 |      |  |
| 1.00999.99 |    |      |     | H |   |        |        |        |      |  |
| ATOM       | 27 | HD22 | LEU |   | 2 | 25.563 | 1.593  | 13.377 |      |  |
| 1.00999.99 |    |      |     | H |   |        |        |        |      |  |
| ATOM       | 28 | HD23 | LEU |   | 2 | 27.228 | 1.274  | 12.893 |      |  |
| 1.00999.99 |    |      |     | H |   |        |        |        |      |  |
| ATOM       | 29 | N    | CYS |   | 3 | 22.123 | 0.008  | 15.460 |      |  |
| 1.00271.28 |    |      |     | N |   |        |        |        |      |  |
| ATOM       | 30 | CA   | CYS |   | 3 | 20.717 | -0.163 | 15.802 |      |  |
| 1.00104.50 |    |      |     | C |   |        |        |        |      |  |
| ATOM       | 31 | C    | CYS |   | 3 | 19.988 | -0.933 | 14.709 | 1.00 |  |
| 90.98      |    |      | C   |   |   |        |        |        |      |  |
| ATOM       | 32 | O    | CYS |   | 3 | 19.152 | -1.792 | 14.991 |      |  |
| 1.00207.28 |    |      |     | O |   |        |        |        |      |  |
| ATOM       | 33 | CB   | CYS |   | 3 | 20.048 | 1.201  | 15.992 | 1.00 |  |
| 37.83      |    |      | C   |   |   |        |        |        |      |  |
| ATOM       | 34 | SG   | CYS |   | 3 | 20.654 | 1.969  | 17.516 | 1.00 |  |
| 81.56      |    |      | S   |   |   |        |        |        |      |  |
| ATOM       | 35 | HN   | CYS |   | 3 | 22.482 | 0.912  | 15.336 |      |  |
| 1.00296.55 |    |      |     | H |   |        |        |        |      |  |
| ATOM       | 36 | HA   | CYS |   | 3 | 20.647 | -0.713 | 16.723 |      |  |
| 1.00166.45 |    |      |     | H |   |        |        |        |      |  |
| ATOM       | 37 | HB1  | CYS |   | 3 | 18.979 | 1.071  | 16.056 | 1.00 |  |
| 40.38      |    |      | H   |   |   |        |        |        |      |  |
| ATOM       | 38 | HB2  | CYS |   | 3 | 20.283 | 1.837  | 15.152 | 1.00 |  |
| 98.45      |    |      | H   |   |   |        |        |        |      |  |
| ATOM       | 39 | N    | SER |   | 4 | 20.306 | -0.617 | 13.460 | 1.00 |  |

|            |    |     |     |   |        |        |        |      |     |
|------------|----|-----|-----|---|--------|--------|--------|------|-----|
| 85.31      |    |     | N   |   |        |        |        |      |     |
| ATOM       | 40 | CA  | SER | 4 | 19.671 | -1.280 | 12.323 | 1.00 |     |
| 92.94      |    |     | C   |   |        |        |        |      |     |
| ATOM       | 41 | C   | SER | 4 | 18.260 | -0.739 | 12.120 | 1.00 |     |
| 67.37      |    |     | C   |   |        |        |        |      |     |
| ATOM       | 42 | O   | SER | 4 | 17.767 | -0.659 | 10.995 |      |     |
| 1.00102.28 |    |     |     |   |        |        |        |      | O   |
| ATOM       | 43 | CB  | SER | 4 | 19.614 | -2.796 | 12.559 |      |     |
| 1.00123.83 |    |     |     |   |        |        |        |      | C   |
| ATOM       | 44 | OG  | SER | 4 | 19.690 | -3.467 | 11.308 |      |     |
| 1.00178.89 |    |     |     |   |        |        |        |      | O   |
| ATOM       | 45 | HN  | SER | 4 | 20.977 | 0.077  | 13.300 |      |     |
| 1.00163.03 |    |     |     |   |        |        |        |      | H   |
| ATOM       | 46 | HA  | SER | 4 | 20.253 | -1.086 | 11.435 |      |     |
| 1.00129.78 |    |     |     |   |        |        |        |      | H   |
| ATOM       | 47 | HB1 | SER | 4 | 18.687 | -3.056 | 13.065 |      |     |
| 1.00105.26 |    |     |     |   |        |        |        |      | H   |
| ATOM       | 48 | HB2 | SER | 4 | 20.447 | -3.097 | 13.172 |      |     |
| 1.00156.87 |    |     |     |   |        |        |        |      | H   |
| ATOM       | 49 | HG  | SER | 4 | 18.823 | -3.832 | 11.115 |      |     |
| 1.00218.16 |    |     |     |   |        |        |        |      | H   |
| ATOM       | 50 | N   | GLU | 5 | 17.616 | -0.381 | 13.226 | 1.00 |     |
| 41.67      |    |     | N   |   |        |        |        |      |     |
| ATOM       | 51 | CA  | GLU | 5 | 16.256 | 0.138  | 13.182 | 1.00 |     |
| 41.21      |    |     | C   |   |        |        |        |      |     |
| ATOM       | 52 | C   | GLU | 5 | 15.992 | 1.042  | 14.383 | 1.00 |     |
| 41.92      |    |     | C   |   |        |        |        |      |     |
| ATOM       | 53 | O   | GLU | 5 | 16.724 | 1.004  | 15.372 | 1.00 |     |
| 74.72      |    |     | O   |   |        |        |        |      |     |
| ATOM       | 54 | CB  | GLU | 5 | 15.266 | -1.023 | 13.172 | 1.00 |     |
| 49.24      |    |     | C   |   |        |        |        |      |     |
| ATOM       | 55 | CG  | GLU | 5 | 15.489 | -1.874 | 14.414 | 1.00 |     |
| 55.48      |    |     | C   |   |        |        |        |      |     |
| ATOM       | 56 | CD  | GLU | 5 | 14.697 | -3.173 | 14.309 | 1.00 |     |
| 92.06      |    |     | C   |   |        |        |        |      |     |
| ATOM       | 57 | OE1 | GLU | 5 | 14.024 | -3.355 | 13.309 |      |     |
| 1.00206.49 |    |     |     |   |        |        |        |      | O   |
| ATOM       | 58 | OE2 | GLU | 5 | 14.776 | -3.968 | 15.233 |      |     |
| 1.00197.24 |    |     |     |   |        |        |        |      | O1- |
| ATOM       | 59 | HN  | GLU | 5 | 18.063 | -0.480 | 14.092 | 1.00 |     |
| 45.52      |    |     | H   |   |        |        |        |      |     |
| ATOM       | 60 | HA  | GLU | 5 | 16.127 | 0.707  | 12.283 | 1.00 |     |
| 60.63      |    |     | H   |   |        |        |        |      |     |
| ATOM       | 61 | HB1 | GLU | 5 | 15.424 | -1.626 | 12.291 | 1.00 |     |
| 61.59      |    |     | H   |   |        |        |        |      |     |
| ATOM       | 62 | HB2 | GLU | 5 | 14.260 | -0.640 | 13.172 | 1.00 |     |
| 63.66      |    |     | H   |   |        |        |        |      |     |
| ATOM       | 63 | HG1 | GLU | 5 | 15.166 | -1.327 | 15.286 | 1.00 |     |
| 58.03      |    |     | H   |   |        |        |        |      |     |
| ATOM       | 64 | HG2 | GLU | 5 | 16.539 | -2.096 | 14.498 | 1.00 |     |
| 57.77      |    |     | H   |   |        |        |        |      |     |
| ATOM       | 65 | N   | ASN | 6 | 14.950 | 1.859  | 14.288 | 1.00 |     |

|            |    |      |     |   |        |        |        |      |   |
|------------|----|------|-----|---|--------|--------|--------|------|---|
| 50.73      |    |      | N   |   |        |        |        |      |   |
| ATOM       | 66 | CA   | ASN | 6 | 14.608 | 2.776  | 15.371 | 1.00 |   |
| 71.04      |    |      | C   |   |        |        |        |      |   |
| ATOM       | 67 | C    | ASN | 6 | 14.279 | 2.014  | 16.651 | 1.00 |   |
| 65.17      |    |      | C   |   |        |        |        |      |   |
| ATOM       | 68 | O    | ASN | 6 | 14.663 | 2.428  | 17.746 | 1.00 |   |
| 94.86      |    |      | O   |   |        |        |        |      |   |
| ATOM       | 69 | CB   | ASN | 6 | 13.409 | 3.635  | 14.966 | 1.00 |   |
| 94.83      |    |      | C   |   |        |        |        |      |   |
| ATOM       | 70 | CG   | ASN | 6 | 13.823 | 4.641  | 13.897 |      |   |
| 1.00160.94 |    |      |     |   |        |        |        |      | C |
| ATOM       | 71 | ND2  | ASN | 6 | 12.914 | 5.176  | 13.130 |      |   |
| 1.00244.88 |    |      |     |   |        |        |        |      | N |
| ATOM       | 72 | OD1  | ASN | 6 | 15.008 | 4.945  | 13.758 |      |   |
| 1.00219.73 |    |      |     |   |        |        |        |      | O |
| ATOM       | 73 | HN   | ASN | 6 | 14.405 | 1.852  | 13.473 | 1.00 |   |
| 72.81      |    |      | H   |   |        |        |        |      |   |
| ATOM       | 74 | HA   | ASN | 6 | 15.450 | 3.425  | 15.558 | 1.00 |   |
| 96.02      |    |      | H   |   |        |        |        |      |   |
| ATOM       | 75 | HB1  | ASN | 6 | 13.038 | 4.164  | 15.831 |      |   |
| 1.00111.09 |    |      |     |   |        |        |        |      | H |
| ATOM       | 76 | HB2  | ASN | 6 | 12.630 | 2.997  | 14.575 | 1.00 |   |
| 98.13      |    |      | H   |   |        |        |        |      |   |
| ATOM       | 77 | HD21 | ASN | 6 | 11.973 | 4.931  | 13.242 |      |   |
| 1.00272.43 |    |      |     |   |        |        |        |      | H |
| ATOM       | 78 | HD22 | ASN | 6 | 13.172 | 5.823  | 12.441 |      |   |
| 1.00336.78 |    |      |     |   |        |        |        |      | H |
| ATOM       | 79 | N    | GLY | 7 | 13.561 | 0.901  | 16.509 | 1.00 |   |
| 51.80      |    |      | N   |   |        |        |        |      |   |
| ATOM       | 80 | CA   | GLY | 7 | 13.177 | 0.081  | 17.663 | 1.00 |   |
| 71.47      |    |      | C   |   |        |        |        |      |   |
| ATOM       | 81 | C    | GLY | 7 | 14.029 | -1.177 | 17.745 | 1.00 |   |
| 41.04      |    |      | C   |   |        |        |        |      |   |
| ATOM       | 82 | O    | GLY | 7 | 13.509 | -2.285 | 17.879 | 1.00 |   |
| 44.54      |    |      | O   |   |        |        |        |      |   |
| ATOM       | 83 | HN   | GLY | 7 | 13.282 | 0.623  | 15.611 | 1.00 |   |
| 45.49      |    |      | H   |   |        |        |        |      |   |
| ATOM       | 84 | HA1  | GLY | 7 | 12.146 | -0.205 | 17.560 |      |   |
| 1.00103.52 |    |      |     |   |        |        |        |      | H |
| ATOM       | 85 | HA2  | GLY | 7 | 13.296 | 0.652  | 18.574 |      |   |
| 1.00108.67 |    |      |     |   |        |        |        |      | H |
| ATOM       | 86 | N    | ASP | 8 | 15.339 | -1.001 | 17.661 | 1.00 |   |
| 27.00      |    |      | N   |   |        |        |        |      |   |
| ATOM       | 87 | CA   | ASP | 8 | 16.255 | -2.134 | 17.721 | 1.00 |   |
| 14.15      |    |      | C   |   |        |        |        |      |   |
| ATOM       | 88 | C    | ASP | 8 | 16.122 | -2.859 | 19.052 | 1.00 |   |
| 9.37       |    |      | C   |   |        |        |        |      |   |
| ATOM       | 89 | O    | ASP | 8 | 15.970 | -4.081 | 19.094 | 1.00 |   |
| 14.61      |    |      | O   |   |        |        |        |      |   |
| ATOM       | 90 | CB   | ASP | 8 | 17.695 | -1.653 | 17.549 | 1.00 |   |
| 15.06      |    |      | C   |   |        |        |        |      |   |
| ATOM       | 91 | CG   | ASP | 8 | 18.619 | -2.849 | 17.337 | 1.00 |   |

|            |     |     |     |    |        |        |        |      |  |
|------------|-----|-----|-----|----|--------|--------|--------|------|--|
| 21.22      |     |     | C   |    |        |        |        |      |  |
| ATOM       | 92  | OD1 | ASP | 8  | 19.799 | -2.717 | 17.615 |      |  |
| 1.00119.56 |     |     |     |    |        |        |        | O    |  |
| ATOM       | 93  | OD2 | ASP | 8  | 18.131 | -3.877 | 16.900 |      |  |
| 1.00133.27 |     |     |     |    |        |        |        | O1-  |  |
| ATOM       | 94  | HN  | ASP | 8  | 15.693 | -0.095 | 17.550 | 1.00 |  |
| 35.63      |     |     | H   |    |        |        |        |      |  |
| ATOM       | 95  | HA  | ASP | 8  | 16.018 | -2.817 | 16.926 | 1.00 |  |
| 20.92      |     |     | H   |    |        |        |        |      |  |
| ATOM       | 96  | HB1 | ASP | 8  | 18.003 | -1.117 | 18.433 | 1.00 |  |
| 29.39      |     |     | H   |    |        |        |        |      |  |
| ATOM       | 97  | HB2 | ASP | 8  | 17.754 | -0.995 | 16.694 | 1.00 |  |
| 44.14      |     |     | H   |    |        |        |        |      |  |
| ATOM       | 98  | N   | CYS | 9  | 16.174 | -2.099 | 20.136 | 1.00 |  |
| 5.93       |     |     | N   |    |        |        |        |      |  |
| ATOM       | 99  | CA  | CYS | 9  | 16.051 | -2.679 | 21.465 | 1.00 |  |
| 7.54       |     |     | C   |    |        |        |        |      |  |
| ATOM       | 100 | C   | CYS | 9  | 14.666 | -3.285 | 21.646 | 1.00 |  |
| 14.60      |     |     | C   |    |        |        |        |      |  |
| ATOM       | 101 | O   | CYS | 9  | 14.511 | -4.371 | 22.203 | 1.00 |  |
| 25.78      |     |     | O   |    |        |        |        |      |  |
| ATOM       | 102 | CB  | CYS | 9  | 16.284 | -1.610 | 22.524 | 1.00 |  |
| 6.63       |     |     | C   |    |        |        |        |      |  |
| ATOM       | 103 | SG  | CYS | 9  | 18.020 | -1.140 | 22.488 | 1.00 |  |
| 10.91      |     |     | S   |    |        |        |        |      |  |
| ATOM       | 104 | HN  | CYS | 9  | 16.292 | -1.133 | 20.036 | 1.00 |  |
| 6.51       |     |     | H   |    |        |        |        |      |  |
| ATOM       | 105 | HA  | CYS | 9  | 16.800 | -3.444 | 21.584 | 1.00 |  |
| 11.12      |     |     | H   |    |        |        |        |      |  |
| ATOM       | 106 | HB1 | CYS | 9  | 16.040 | -2.005 | 23.495 | 1.00 |  |
| 11.28      |     |     | H   |    |        |        |        |      |  |
| ATOM       | 107 | HB2 | CYS | 9  | 15.671 | -0.747 | 22.314 | 1.00 |  |
| 5.04       |     |     | H   |    |        |        |        |      |  |
| ATOM       | 108 | N   | ALA | 10 | 13.665 | -2.562 | 21.158 | 1.00 |  |
| 16.26      |     |     | N   |    |        |        |        |      |  |
| ATOM       | 109 | CA  | ALA | 10 | 12.279 | -3.006 | 21.244 | 1.00 |  |
| 32.04      |     |     | C   |    |        |        |        |      |  |
| ATOM       | 110 | C   | ALA | 10 | 11.387 | -2.086 | 20.414 | 1.00 |  |
| 45.47      |     |     | C   |    |        |        |        |      |  |
| ATOM       | 111 | O   | ALA | 10 | 11.819 | -1.018 | 19.980 |      |  |
| 1.00119.04 |     |     |     |    |        |        |        | O    |  |
| ATOM       | 112 | CB  | ALA | 10 | 11.814 | -3.013 | 22.705 | 1.00 |  |
| 30.10      |     |     | C   |    |        |        |        |      |  |
| ATOM       | 113 | HN  | ALA | 10 | 13.864 | -1.708 | 20.722 | 1.00 |  |
| 12.81      |     |     | H   |    |        |        |        |      |  |
| ATOM       | 114 | HA  | ALA | 10 | 12.209 | -4.010 | 20.851 | 1.00 |  |
| 47.14      |     |     | H   |    |        |        |        |      |  |
| ATOM       | 115 | HB1 | ALA | 10 | 12.621 | -3.350 | 23.338 | 1.00 |  |
| 84.37      |     |     | H   |    |        |        |        |      |  |
| ATOM       | 116 | HB2 | ALA | 10 | 10.972 | -3.681 | 22.811 |      |  |
| 1.00118.20 |     |     |     |    |        |        |        | H    |  |
| ATOM       | 117 | HB3 | ALA | 10 | 11.521 | -2.017 | 22.998 |      |  |

|            |     |     |     |     |    |        |        |        |      |
|------------|-----|-----|-----|-----|----|--------|--------|--------|------|
| 1.00117.32 |     |     |     | H   |    |        |        |        |      |
| ATOM       | 118 | N   | ALA |     | 11 | 10.148 | -2.503 | 20.192 | 1.00 |
| 30.62      |     |     | N   |     |    |        |        |        |      |
| ATOM       | 119 | CA  | ALA |     | 11 | 9.216  | -1.702 | 19.404 | 1.00 |
| 35.24      |     |     | C   |     |    |        |        |        |      |
| ATOM       | 120 | C   | ALA |     | 11 | 8.969  | -0.345 | 20.061 | 1.00 |
| 22.78      |     |     | C   |     |    |        |        |        |      |
| ATOM       | 121 | O   | ALA |     | 11 | 8.908  | 0.680  | 19.380 | 1.00 |
| 53.33      |     |     | O   |     |    |        |        |        |      |
| ATOM       | 122 | CB  | ALA |     | 11 | 7.888  | -2.446 | 19.255 | 1.00 |
| 60.49      |     |     | C   |     |    |        |        |        |      |
| ATOM       | 123 | HN  | ALA |     | 11 | 9.854  | -3.364 | 20.557 | 1.00 |
| 50.37      |     |     | H   |     |    |        |        |        |      |
| ATOM       | 124 | HA  | ALA |     | 11 | 9.636  | -1.543 | 18.423 | 1.00 |
| 41.70      |     |     | H   |     |    |        |        |        |      |
| ATOM       | 125 | HB1 | ALA |     | 11 | 7.408  | -2.521 | 20.220 |      |
| 1.00157.06 |     |     |     | H   |    |        |        |        |      |
| ATOM       | 126 | HB2 | ALA |     | 11 | 8.072  | -3.436 | 18.865 |      |
| 1.00148.83 |     |     |     | H   |    |        |        |        |      |
| ATOM       | 127 | HB3 | ALA |     | 11 | 7.246  | -1.905 | 18.575 |      |
| 1.00137.06 |     |     |     | H   |    |        |        |        |      |
| ATOM       | 128 | N   | ASP |     | 12 | 8.820  | -0.341 | 21.383 | 1.00 |
| 18.98      |     |     | N   |     |    |        |        |        |      |
| ATOM       | 129 | CA  | ASP |     | 12 | 8.570  | 0.898  | 22.118 | 1.00 |
| 31.05      |     |     | C   |     |    |        |        |        |      |
| ATOM       | 130 | C   | ASP |     | 12 | 9.875  | 1.624  | 22.439 | 1.00 |
| 22.98      |     |     | C   |     |    |        |        |        |      |
| ATOM       | 131 | O   | ASP |     | 12 | 9.908  | 2.853  | 22.524 | 1.00 |
| 37.14      |     |     | O   |     |    |        |        |        |      |
| ATOM       | 132 | CB  | ASP |     | 12 | 7.827  | 0.590  | 23.418 | 1.00 |
| 48.35      |     |     | C   |     |    |        |        |        |      |
| ATOM       | 133 | CG  | ASP |     | 12 | 6.409  | 0.120  | 23.111 |      |
| 1.00104.83 |     |     |     | C   |    |        |        |        |      |
| ATOM       | 134 | OD1 | ASP |     | 12 | 5.974  | 0.313  | 21.987 |      |
| 1.00258.73 |     |     |     | O   |    |        |        |        |      |
| ATOM       | 135 | OD2 | ASP |     | 12 | 5.779  | -0.425 | 24.002 |      |
| 1.00213.46 |     |     |     | O1- |    |        |        |        |      |
| ATOM       | 136 | HN  | ASP |     | 12 | 8.873  | -1.188 | 21.874 | 1.00 |
| 36.19      |     |     | H   |     |    |        |        |        |      |
| ATOM       | 137 | HA  | ASP |     | 12 | 7.951  | 1.548  | 21.514 | 1.00 |
| 49.76      |     |     | H   |     |    |        |        |        |      |
| ATOM       | 138 | HB1 | ASP |     | 12 | 7.783  | 1.482  | 24.027 | 1.00 |
| 95.71      |     |     | H   |     |    |        |        |        |      |
| ATOM       | 139 | HB2 | ASP |     | 12 | 8.353  | -0.185 | 23.956 | 1.00 |
| 54.37      |     |     | H   |     |    |        |        |        |      |
| ATOM       | 140 | N   | GLU |     | 13 | 10.944 | 0.859  | 22.625 | 1.00 |
| 17.60      |     |     | N   |     |    |        |        |        |      |
| ATOM       | 141 | CA  | GLU |     | 13 | 12.244 | 1.441  | 22.946 | 1.00 |
| 12.01      |     |     | C   |     |    |        |        |        |      |
| ATOM       | 142 | C   | GLU |     | 13 | 12.871 | 2.090  | 21.716 | 1.00 |
| 10.07      |     |     | C   |     |    |        |        |        |      |
| ATOM       | 143 | O   | GLU |     | 13 | 12.510 | 1.771  | 20.582 | 1.00 |

|            |     |     |     |    |        |        |        |      |
|------------|-----|-----|-----|----|--------|--------|--------|------|
| 12.81      |     |     | O   |    |        |        |        |      |
| ATOM       | 144 | CB  | GLU | 13 | 13.171 | 0.355  | 23.497 | 1.00 |
| 11.74      |     |     | C   |    |        |        |        |      |
| ATOM       | 145 | CG  | GLU | 13 | 12.598 | -0.170 | 24.816 | 1.00 |
| 13.49      |     |     | C   |    |        |        |        |      |
| ATOM       | 146 | CD  | GLU | 13 | 13.349 | -1.422 | 25.255 |      |
| 1.00142.36 |     |     | C   |    |        |        |        |      |
| ATOM       | 147 | OE1 | GLU | 13 | 14.566 | -1.409 | 25.197 |      |
| 1.00339.06 |     |     | O   |    |        |        |        |      |
| ATOM       | 148 | OE2 | GLU | 13 | 12.695 | -2.374 | 25.644 |      |
| 1.00335.28 |     |     | O1- |    |        |        |        |      |
| ATOM       | 149 | HN  | GLU | 13 | 10.858 | -0.114 | 22.551 | 1.00 |
| 28.36      |     |     | H   |    |        |        |        |      |
| ATOM       | 150 | HA  | GLU | 13 | 12.108 | 2.196  | 23.705 | 1.00 |
| 13.06      |     |     | H   |    |        |        |        |      |
| ATOM       | 151 | HB1 | GLU | 13 | 14.151 | 0.775  | 23.673 | 1.00 |
| 13.76      |     |     | H   |    |        |        |        |      |
| ATOM       | 152 | HB2 | GLU | 13 | 13.246 | -0.452 | 22.784 | 1.00 |
| 9.94       |     |     | H   |    |        |        |        |      |
| ATOM       | 153 | HG1 | GLU | 13 | 11.553 | -0.406 | 24.684 | 1.00 |
| 66.02      |     |     | H   |    |        |        |        |      |
| ATOM       | 154 | HG2 | GLU | 13 | 12.699 | 0.591  | 25.576 | 1.00 |
| 56.23      |     |     | H   |    |        |        |        |      |
| ATOM       | 155 | N   | CYS | 14 | 13.806 | 3.013  | 21.948 | 1.00 |
| 9.12       |     |     | N   |    |        |        |        |      |
| ATOM       | 156 | CA  | CYS | 14 | 14.485 | 3.723  | 20.858 | 1.00 |
| 10.69      |     |     | C   |    |        |        |        |      |
| ATOM       | 157 | C   | CYS | 14 | 15.956 | 3.337  | 20.802 | 1.00 |
| 9.56       |     |     | C   |    |        |        |        |      |
| ATOM       | 158 | O   | CYS | 14 | 16.588 | 3.127  | 21.833 | 1.00 |
| 13.62      |     |     | O   |    |        |        |        |      |
| ATOM       | 159 | CB  | CYS | 14 | 14.370 | 5.231  | 21.071 | 1.00 |
| 13.96      |     |     | C   |    |        |        |        |      |
| ATOM       | 160 | SG  | CYS | 14 | 15.335 | 6.094  | 19.803 | 1.00 |
| 42.96      |     |     | S   |    |        |        |        |      |
| ATOM       | 161 | HN  | CYS | 14 | 14.050 | 3.226  | 22.876 | 1.00 |
| 9.76       |     |     | H   |    |        |        |        |      |
| ATOM       | 162 | HA  | CYS | 14 | 14.022 | 3.469  | 19.914 | 1.00 |
| 15.54      |     |     | H   |    |        |        |        |      |
| ATOM       | 163 | HB1 | CYS | 14 | 14.750 | 5.485  | 22.048 | 1.00 |
| 50.72      |     |     | H   |    |        |        |        |      |
| ATOM       | 164 | HB2 | CYS | 14 | 13.334 | 5.528  | 20.999 | 1.00 |
| 46.13      |     |     | H   |    |        |        |        |      |
| ATOM       | 165 | N   | CYS | 15 | 16.496 | 3.258  | 19.588 | 1.00 |
| 9.60       |     |     | N   |    |        |        |        |      |
| ATOM       | 166 | CA  | CYS | 15 | 17.903 | 2.906  | 19.389 | 1.00 |
| 9.28       |     |     | C   |    |        |        |        |      |
| ATOM       | 167 | C   | CYS | 15 | 18.495 | 3.802  | 18.313 | 1.00 |
| 9.92       |     |     | C   |    |        |        |        |      |
| ATOM       | 168 | O   | CYS | 15 | 17.935 | 3.927  | 17.223 | 1.00 |
| 13.31      |     |     | O   |    |        |        |        |      |
| ATOM       | 169 | CB  | CYS | 15 | 18.023 | 1.441  | 18.960 | 1.00 |

|            |     |      |     |    |        |       |        |      |   |
|------------|-----|------|-----|----|--------|-------|--------|------|---|
| 12.90      |     |      | C   |    |        |       |        |      |   |
| ATOM       | 170 | SG   | CYS | 15 | 19.761 | 0.926 | 18.999 | 1.00 |   |
| 39.11      |     |      | S   |    |        |       |        |      |   |
| ATOM       | 171 | HN   | CYS | 15 | 15.940 | 3.449 | 18.803 | 1.00 |   |
| 13.12      |     |      | H   |    |        |       |        |      |   |
| ATOM       | 172 | HA   | CYS | 15 | 18.451 | 3.052 | 20.312 | 1.00 |   |
| 8.26       |     |      | H   |    |        |       |        |      |   |
| ATOM       | 173 | HB1  | CYS | 15 | 17.636 | 1.329 | 17.958 | 1.00 |   |
| 24.82      |     |      | H   |    |        |       |        |      |   |
| ATOM       | 174 | HB2  | CYS | 15 | 17.451 | 0.822 | 19.636 | 1.00 |   |
| 27.31      |     |      | H   |    |        |       |        |      |   |
| ATOM       | 175 | N    | VAL | 16 | 19.624 | 4.434 | 18.619 | 1.00 |   |
| 9.56       |     |      | N   |    |        |       |        |      |   |
| ATOM       | 176 | CA   | VAL | 16 | 20.270 | 5.327 | 17.661 | 1.00 |   |
| 11.99      |     |      | C   |    |        |       |        |      |   |
| ATOM       | 177 | C    | VAL | 16 | 21.788 | 5.209 | 17.758 | 1.00 |   |
| 7.73       |     |      | C   |    |        |       |        |      |   |
| ATOM       | 178 | O    | VAL | 16 | 22.354 | 5.221 | 18.851 | 1.00 |   |
| 8.83       |     |      | O   |    |        |       |        |      |   |
| ATOM       | 179 | CB   | VAL | 16 | 19.837 | 6.768 | 17.940 | 1.00 |   |
| 18.37      |     |      | C   |    |        |       |        |      |   |
| ATOM       | 180 | CG1  | VAL | 16 | 20.462 | 7.260 | 19.248 | 1.00 |   |
| 39.61      |     |      | C   |    |        |       |        |      |   |
| ATOM       | 181 | CG2  | VAL | 16 | 20.282 | 7.665 | 16.786 |      |   |
| 1.00115.21 |     |      |     |    |        |       |        |      | C |
| ATOM       | 182 | HN   | VAL | 16 | 20.025 | 4.303 | 19.504 | 1.00 |   |
| 9.76       |     |      | H   |    |        |       |        |      |   |
| ATOM       | 183 | HA   | VAL | 16 | 19.967 | 5.061 | 16.658 | 1.00 |   |
| 17.27      |     |      | H   |    |        |       |        |      |   |
| ATOM       | 184 | HB   | VAL | 16 | 18.760 | 6.804 | 18.026 | 1.00 |   |
| 52.63      |     |      | H   |    |        |       |        |      |   |
| ATOM       | 185 | HG11 | VAL | 16 | 19.986 | 8.179 | 19.552 |      |   |
| 1.00128.07 |     |      |     |    |        |       |        |      | H |
| ATOM       | 186 | HG12 | VAL | 16 | 21.518 | 7.432 | 19.101 |      |   |
| 1.00154.13 |     |      |     |    |        |       |        |      | H |
| ATOM       | 187 | HG13 | VAL | 16 | 20.323 | 6.512 | 20.017 |      |   |
| 1.00135.74 |     |      |     |    |        |       |        |      | H |
| ATOM       | 188 | HG21 | VAL | 16 | 20.135 | 8.700 | 17.058 |      |   |
| 1.00229.05 |     |      |     |    |        |       |        |      | H |
| ATOM       | 189 | HG22 | VAL | 16 | 19.695 | 7.436 | 15.909 |      |   |
| 1.00261.82 |     |      |     |    |        |       |        |      | H |
| ATOM       | 190 | HG23 | VAL | 16 | 21.327 | 7.491 | 16.578 |      |   |
| 1.00210.07 |     |      |     |    |        |       |        |      | H |
| ATOM       | 191 | N    | ASP | 17 | 22.439 | 5.088 | 16.604 | 1.00 |   |
| 14.34      |     |      | N   |    |        |       |        |      |   |
| ATOM       | 192 | CA   | ASP | 17 | 23.894 | 4.959 | 16.559 | 1.00 |   |
| 11.90      |     |      | C   |    |        |       |        |      |   |
| ATOM       | 193 | C    | ASP | 17 | 24.555 | 6.326 | 16.401 | 1.00 |   |
| 13.15      |     |      | C   |    |        |       |        |      |   |
| ATOM       | 194 | O    | ASP | 17 | 24.302 | 7.041 | 15.432 | 1.00 |   |
| 25.96      |     |      | O   |    |        |       |        |      |   |
| ATOM       | 195 | CB   | ASP | 17 | 24.299 | 4.071 | 15.380 | 1.00 |   |



|            |     |      |     |    |        |        |        |      |  |
|------------|-----|------|-----|----|--------|--------|--------|------|--|
| 20.80      |     |      | C   |    |        |        |        |      |  |
| ATOM       | 196 | CG   | ASP | 17 | 23.695 | 2.681  | 15.542 | 1.00 |  |
| 28.72      |     |      | C   |    |        |        |        |      |  |
| ATOM       | 197 | OD1  | ASP | 17 | 23.574 | 2.236  | 16.671 |      |  |
| 1.00135.42 |     |      | O   |    |        |        |        |      |  |
| ATOM       | 198 | OD2  | ASP | 17 | 23.361 | 2.083  | 14.532 |      |  |
| 1.00114.17 |     |      | O1- |    |        |        |        |      |  |
| ATOM       | 199 | HN   | ASP | 17 | 21.931 | 5.079  | 15.766 | 1.00 |  |
| 28.29      |     |      | H   |    |        |        |        |      |  |
| ATOM       | 200 | HA   | ASP | 17 | 24.244 | 4.503  | 17.473 | 1.00 |  |
| 10.49      |     |      | H   |    |        |        |        |      |  |
| ATOM       | 201 | HB1  | ASP | 17 | 25.375 | 3.991  | 15.345 | 1.00 |  |
| 22.42      |     |      | H   |    |        |        |        |      |  |
| ATOM       | 202 | HB2  | ASP | 17 | 23.941 | 4.513  | 14.461 | 1.00 |  |
| 29.52      |     |      | H   |    |        |        |        |      |  |
| ATOM       | 203 | N    | THR | 18 | 25.418 | 6.671  | 17.354 | 1.00 |  |
| 11.55      |     |      | N   |    |        |        |        |      |  |
| ATOM       | 204 | CA   | THR | 18 | 26.138 | 7.945  | 17.316 | 1.00 |  |
| 17.10      |     |      | C   |    |        |        |        |      |  |
| ATOM       | 205 | C    | THR | 18 | 27.558 | 7.724  | 16.816 | 1.00 |  |
| 10.63      |     |      | C   |    |        |        |        |      |  |
| ATOM       | 206 | O    | THR | 18 | 28.046 | 6.596  | 16.794 | 1.00 |  |
| 6.49       |     |      | O   |    |        |        |        |      |  |
| ATOM       | 207 | CB   | THR | 18 | 26.185 | 8.572  | 18.711 | 1.00 |  |
| 28.52      |     |      | C   |    |        |        |        |      |  |
| ATOM       | 208 | CG2  | THR | 18 | 24.817 | 9.150  | 19.067 | 1.00 |  |
| 45.38      |     |      | C   |    |        |        |        |      |  |
| ATOM       | 209 | OG1  | THR | 18 | 26.547 | 7.582  | 19.659 | 1.00 |  |
| 26.49      |     |      | O   |    |        |        |        |      |  |
| ATOM       | 210 | HN   | THR | 18 | 25.587 | 6.050  | 18.094 | 1.00 |  |
| 13.96      |     |      | H   |    |        |        |        |      |  |
| ATOM       | 211 | HA   | THR | 18 | 25.633 | 8.626  | 16.644 | 1.00 |  |
| 26.43      |     |      | H   |    |        |        |        |      |  |
| ATOM       | 212 | HB   | THR | 18 | 26.918 | 9.366  | 18.726 | 1.00 |  |
| 37.43      |     |      | H   |    |        |        |        |      |  |
| ATOM       | 213 | HG1  | THR | 18 | 25.997 | 7.697  | 20.435 | 1.00 |  |
| 71.62      |     |      | H   |    |        |        |        |      |  |
| ATOM       | 214 | HG21 | THR | 18 | 24.046 | 8.445  | 18.801 |      |  |
| 1.00100.44 |     |      | H   |    |        |        |        |      |  |
| ATOM       | 215 | HG22 | THR | 18 | 24.668 | 10.073 | 18.526 |      |  |
| 1.00129.42 |     |      | H   |    |        |        |        |      |  |
| ATOM       | 216 | HG23 | THR | 18 | 24.777 | 9.347  | 20.128 |      |  |
| 1.00156.21 |     |      | H   |    |        |        |        |      |  |
| ATOM       | 217 | N    | VAL | 19 | 28.215 | 8.815  | 16.435 | 1.00 |  |
| 16.32      |     |      | N   |    |        |        |        |      |  |
| ATOM       | 218 | CA   | VAL | 19 | 29.575 | 8.766  | 15.950 | 1.00 |  |
| 13.34      |     |      | C   |    |        |        |        |      |  |
| ATOM       | 219 | C    | VAL | 19 | 29.993 | 10.157 | 15.519 | 1.00 |  |
| 25.88      |     |      | C   |    |        |        |        |      |  |
| ATOM       | 220 | O    | VAL | 19 | 29.389 | 10.780 | 14.646 | 1.00 |  |
| 42.11      |     |      | O   |    |        |        |        |      |  |
| ATOM       | 221 | CB   | VAL | 19 | 29.731 | 7.782  | 14.792 | 1.00 |  |

|            |     |      |     |    |        |        |        |      |
|------------|-----|------|-----|----|--------|--------|--------|------|
| 15.48      |     |      | C   |    |        |        |        |      |
| ATOM       | 222 | CG1  | VAL | 19 | 28.636 | 8.021  | 13.747 | 1.00 |
| 29.06      |     |      | C   |    |        |        |        |      |
| ATOM       | 223 | CG2  | VAL | 19 | 31.110 | 7.981  | 14.147 | 1.00 |
| 20.67      |     |      | C   |    |        |        |        |      |
| ATOM       | 224 | HN   | VAL | 19 | 27.781 | 9.685  | 16.497 | 1.00 |
| 26.89      |     |      | H   |    |        |        |        |      |
| ATOM       | 225 | HA   | VAL | 19 | 30.218 | 8.450  | 16.760 | 1.00 |
| 8.08       |     |      | H   |    |        |        |        |      |
| ATOM       | 226 | HB   | VAL | 19 | 29.655 | 6.776  | 15.173 | 1.00 |
| 11.49      |     |      | H   |    |        |        |        |      |
| ATOM       | 227 | HG11 | VAL | 19 | 27.670 | 8.028  | 14.228 |      |
| 1.00137.43 |     |      |     | H  |        |        |        |      |
| ATOM       | 228 | HG12 | VAL | 19 | 28.665 | 7.233  | 13.010 | 1.00 |
| 93.29      |     |      | H   |    |        |        |        |      |
| ATOM       | 229 | HG13 | VAL | 19 | 28.804 | 8.972  | 13.261 |      |
| 1.00108.69 |     |      |     | H  |        |        |        |      |
| ATOM       | 230 | HG21 | VAL | 19 | 31.854 | 8.099  | 14.923 | 1.00 |
| 99.42      |     |      | H   |    |        |        |        |      |
| ATOM       | 231 | HG22 | VAL | 19 | 31.094 | 8.871  | 13.533 |      |
| 1.00111.36 |     |      |     | H  |        |        |        |      |
| ATOM       | 232 | HG23 | VAL | 19 | 31.353 | 7.124  | 13.538 | 1.00 |
| 77.11      |     |      | H   |    |        |        |        |      |
| ATOM       | 233 | N    | PHE | 20 | 31.019 | 10.626 | 16.178 | 1.00 |
| 24.58      |     |      | N   |    |        |        |        |      |
| ATOM       | 234 | CA   | PHE | 20 | 31.566 | 11.951 | 15.945 | 1.00 |
| 40.34      |     |      | C   |    |        |        |        |      |
| ATOM       | 235 | C    | PHE | 20 | 32.738 | 11.908 | 14.968 | 1.00 |
| 40.37      |     |      | C   |    |        |        |        |      |
| ATOM       | 236 | O    | PHE | 20 | 32.560 | 11.972 | 13.751 | 1.00 |
| 66.02      |     |      | O   |    |        |        |        |      |
| ATOM       | 237 | CB   | PHE | 20 | 32.023 | 12.548 | 17.297 | 1.00 |
| 48.79      |     |      | C   |    |        |        |        |      |
| ATOM       | 238 | CG   | PHE | 20 | 32.420 | 11.448 | 18.272 | 1.00 |
| 35.75      |     |      | C   |    |        |        |        |      |
| ATOM       | 239 | CD1  | PHE | 20 | 31.452 | 10.563 | 18.791 | 1.00 |
| 30.20      |     |      | C   |    |        |        |        |      |
| ATOM       | 240 | CD2  | PHE | 20 | 33.755 | 11.321 | 18.678 | 1.00 |
| 40.95      |     |      | C   |    |        |        |        |      |
| ATOM       | 241 | CE1  | PHE | 20 | 31.827 | 9.568  | 19.694 | 1.00 |
| 30.41      |     |      | C   |    |        |        |        |      |
| ATOM       | 242 | CE2  | PHE | 20 | 34.126 | 10.322 | 19.584 | 1.00 |
| 45.84      |     |      | C   |    |        |        |        |      |
| ATOM       | 243 | CZ   | PHE | 20 | 33.163 | 9.444  | 20.091 | 1.00 |
| 40.81      |     |      | C   |    |        |        |        |      |
| ATOM       | 244 | HN   | PHE | 20 | 31.409 | 10.065 | 16.867 | 1.00 |
| 16.73      |     |      | H   |    |        |        |        |      |
| ATOM       | 245 | HA   | PHE | 20 | 30.795 | 12.588 | 15.530 | 1.00 |
| 59.91      |     |      | H   |    |        |        |        |      |
| ATOM       | 246 | HB1  | PHE | 20 | 31.222 | 13.103 | 17.718 | 1.00 |
| 67.15      |     |      | H   |    |        |        |        |      |
| ATOM       | 247 | HB2  | PHE | 20 | 32.862 | 13.213 | 17.145 | 1.00 |

|            |     |     |     |    |        |        |        |      |
|------------|-----|-----|-----|----|--------|--------|--------|------|
| 58.17      |     |     | H   |    |        |        |        |      |
| ATOM       | 248 | HD1 | PHE | 20 | 30.415 | 10.642 | 18.484 | 1.00 |
| 33.34      |     |     | H   |    |        |        |        |      |
| ATOM       | 249 | HD2 | PHE | 20 | 34.498 | 11.998 | 18.293 | 1.00 |
| 49.35      |     |     | H   |    |        |        |        |      |
| ATOM       | 250 | HE1 | PHE | 20 | 31.084 | 8.893  | 20.088 | 1.00 |
| 30.61      |     |     | H   |    |        |        |        |      |
| ATOM       | 251 | HE2 | PHE | 20 | 35.157 | 10.226 | 19.890 | 1.00 |
| 61.27      |     |     | H   |    |        |        |        |      |
| ATOM       | 252 | HZ  | PHE | 20 | 33.450 | 8.674  | 20.791 | 1.00 |
| 52.66      |     |     | H   |    |        |        |        |      |
| ATOM       | 253 | N   | GLU | 21 | 33.931 | 11.832 | 15.526 | 1.00 |
| 41.31      |     |     | N   |    |        |        |        |      |
| ATOM       | 254 | CA  | GLU | 21 | 35.155 | 11.816 | 14.740 | 1.00 |
| 56.16      |     |     | C   |    |        |        |        |      |
| ATOM       | 255 | C   | GLU | 21 | 35.398 | 10.436 | 14.122 | 1.00 |
| 58.61      |     |     | C   |    |        |        |        |      |
| ATOM       | 256 | O   | GLU | 21 | 36.127 | 10.314 | 13.137 |      |
| 1.00201.19 |     |     | O   |    |        |        |        |      |
| ATOM       | 257 | CB  | GLU | 21 | 36.308 | 12.241 | 15.666 | 1.00 |
| 57.37      |     |     | C   |    |        |        |        |      |
| ATOM       | 258 | CG  | GLU | 21 | 37.656 | 11.687 | 15.179 |      |
| 1.00193.56 |     |     | C   |    |        |        |        |      |
| ATOM       | 259 | CD  | GLU | 21 | 38.796 | 12.342 | 15.950 |      |
| 1.00304.62 |     |     | C   |    |        |        |        |      |
| ATOM       | 260 | OE1 | GLU | 21 | 39.846 | 12.543 | 15.362 |      |
| 1.00451.81 |     |     | O   |    |        |        |        |      |
| ATOM       | 261 | OE2 | GLU | 21 | 38.602 | 12.636 | 17.119 |      |
| 1.00442.88 |     |     | O1- |    |        |        |        |      |
| ATOM       | 262 | HN  | GLU | 21 | 33.993 | 11.805 | 16.504 | 1.00 |
| 50.82      |     |     | H   |    |        |        |        |      |
| ATOM       | 263 | HA  | GLU | 21 | 35.065 | 12.540 | 13.944 | 1.00 |
| 85.72      |     |     | H   |    |        |        |        |      |
| ATOM       | 264 | HB1 | GLU | 21 | 36.102 | 11.875 | 16.660 | 1.00 |
| 46.37      |     |     | H   |    |        |        |        |      |
| ATOM       | 265 | HB2 | GLU | 21 | 36.362 | 13.322 | 15.693 |      |
| 1.00131.81 |     |     | H   |    |        |        |        |      |
| ATOM       | 266 | HG1 | GLU | 21 | 37.770 | 11.896 | 14.126 |      |
| 1.00314.91 |     |     | H   |    |        |        |        |      |
| ATOM       | 267 | HG2 | GLU | 21 | 37.686 | 10.619 | 15.340 |      |
| 1.00266.92 |     |     | H   |    |        |        |        |      |
| ATOM       | 268 | N   | GLY | 22 | 34.787 | 9.405  | 14.697 | 1.00 |
| 86.70      |     |     | N   |    |        |        |        |      |
| ATOM       | 269 | CA  | GLY | 22 | 34.951 | 8.044  | 14.183 |      |
| 1.00104.66 |     |     | C   |    |        |        |        |      |
| ATOM       | 270 | C   | GLY | 22 | 36.060 | 7.302  | 14.923 | 1.00 |
| 71.50      |     |     | C   |    |        |        |        |      |
| ATOM       | 271 | O   | GLY | 22 | 36.233 | 6.097  | 14.745 | 1.00 |
| 89.87      |     |     | O   |    |        |        |        |      |
| ATOM       | 272 | HN  | GLY | 22 | 34.217 | 9.559  | 15.479 |      |
| 1.00214.64 |     |     | H   |    |        |        |        |      |
| ATOM       | 273 | HA1 | GLY | 22 | 35.194 | 8.080  | 13.130 |      |

|            |     |     |     |     |    |        |       |        |      |
|------------|-----|-----|-----|-----|----|--------|-------|--------|------|
| 1.00152.47 |     |     |     | H   |    |        |       |        |      |
| ATOM       | 274 | HA2 | GLY |     | 22 | 34.024 | 7.506 | 14.311 |      |
| 1.00118.15 |     |     |     | H   |    |        |       |        |      |
| ATOM       | 275 | N   | ASP |     | 23 | 36.803 | 8.021 | 15.759 | 1.00 |
| 44.68      |     |     | N   |     |    |        |       |        |      |
| ATOM       | 276 | CA  | ASP |     | 23 | 37.877 | 7.396 | 16.522 | 1.00 |
| 43.33      |     |     | C   |     |    |        |       |        |      |
| ATOM       | 277 | C   | ASP |     | 23 | 37.298 | 6.293 | 17.396 | 1.00 |
| 37.55      |     |     | C   |     |    |        |       |        |      |
| ATOM       | 278 | O   | ASP |     | 23 | 37.853 | 5.198 | 17.494 | 1.00 |
| 61.37      |     |     | O   |     |    |        |       |        |      |
| ATOM       | 279 | CB  | ASP |     | 23 | 38.580 | 8.437 | 17.397 | 1.00 |
| 40.74      |     |     | C   |     |    |        |       |        |      |
| ATOM       | 280 | CG  | ASP |     | 23 | 39.759 | 7.796 | 18.121 |      |
| 1.00141.86 |     |     |     | C   |    |        |       |        |      |
| ATOM       | 281 | OD1 | ASP |     | 23 | 39.896 | 6.587 | 18.035 |      |
| 1.00328.18 |     |     |     | O   |    |        |       |        |      |
| ATOM       | 282 | OD2 | ASP |     | 23 | 40.507 | 8.525 | 18.753 |      |
| 1.00304.58 |     |     |     | O1- |    |        |       |        |      |
| ATOM       | 283 | HN  | ASP |     | 23 | 36.619 | 8.977 | 15.873 | 1.00 |
| 40.86      |     |     | H   |     |    |        |       |        |      |
| ATOM       | 284 | HA  | ASP |     | 23 | 38.593 | 6.967 | 15.838 | 1.00 |
| 72.12      |     |     | H   |     |    |        |       |        |      |
| ATOM       | 285 | HB1 | ASP |     | 23 | 37.881 | 8.824 | 18.123 | 1.00 |
| 94.15      |     |     | H   |     |    |        |       |        |      |
| ATOM       | 286 | HB2 | ASP |     | 23 | 38.936 | 9.245 | 16.775 | 1.00 |
| 93.26      |     |     | H   |     |    |        |       |        |      |
| ATOM       | 287 | N   | MET |     | 24 | 36.160 | 6.594 | 18.011 | 1.00 |
| 23.24      |     |     | N   |     |    |        |       |        |      |
| ATOM       | 288 | CA  | MET |     | 24 | 35.459 | 5.641 | 18.868 | 1.00 |
| 32.50      |     |     | C   |     |    |        |       |        |      |
| ATOM       | 289 | C   | MET |     | 24 | 33.958 | 5.790 | 18.656 | 1.00 |
| 25.13      |     |     | C   |     |    |        |       |        |      |
| ATOM       | 290 | O   | MET |     | 24 | 33.372 | 6.809 | 19.021 | 1.00 |
| 54.40      |     |     | O   |     |    |        |       |        |      |
| ATOM       | 291 | CB  | MET |     | 24 | 35.805 | 5.901 | 20.337 | 1.00 |
| 47.36      |     |     | C   |     |    |        |       |        |      |
| ATOM       | 292 | CG  | MET |     | 24 | 35.075 | 4.889 | 21.224 |      |
| 1.00151.73 |     |     |     | C   |    |        |       |        |      |
| ATOM       | 293 | SD  | MET |     | 24 | 35.610 | 5.091 | 22.943 |      |
| 1.00209.23 |     |     |     | S   |    |        |       |        |      |
| ATOM       | 294 | CE  | MET |     | 24 | 34.818 | 6.689 | 23.258 |      |
| 1.00243.29 |     |     |     | C   |    |        |       |        |      |
| ATOM       | 295 | HN  | MET |     | 24 | 35.769 | 7.481 | 17.872 | 1.00 |
| 17.32      |     |     | H   |     |    |        |       |        |      |
| ATOM       | 296 | HA  | MET |     | 24 | 35.755 | 4.633 | 18.607 | 1.00 |
| 48.94      |     |     | H   |     |    |        |       |        |      |
| ATOM       | 297 | HB1 | MET |     | 24 | 35.496 | 6.900 | 20.607 |      |
| 1.00124.40 |     |     |     | H   |    |        |       |        |      |
| ATOM       | 298 | HB2 | MET |     | 24 | 36.870 | 5.804 | 20.480 |      |
| 1.00166.96 |     |     |     | H   |    |        |       |        |      |
| ATOM       | 299 | HG1 | MET |     | 24 | 35.306 | 3.887 | 20.891 |      |

|            |     |      |     |   |    |        |       |        |      |  |
|------------|-----|------|-----|---|----|--------|-------|--------|------|--|
| 1.00331.71 |     |      |     | H |    |        |       |        |      |  |
| ATOM       | 300 | HG2  | MET |   | 24 | 34.009 | 5.051 | 21.156 |      |  |
| 1.00302.30 |     |      |     | H |    |        |       |        |      |  |
| ATOM       | 301 | HE1  | MET |   | 24 | 35.443 | 7.482 | 22.875 |      |  |
| 1.00340.44 |     |      |     | H |    |        |       |        |      |  |
| ATOM       | 302 | HE2  | MET |   | 24 | 34.686 | 6.823 | 24.321 |      |  |
| 1.00373.88 |     |      |     | H |    |        |       |        |      |  |
| ATOM       | 303 | HE3  | MET |   | 24 | 33.852 | 6.716 | 22.773 |      |  |
| 1.00386.81 |     |      |     | H |    |        |       |        |      |  |
| ATOM       | 304 | N    | VAL |   | 25 | 33.339 | 4.780 | 18.053 | 1.00 |  |
| 22.44      |     |      | N   |   |    |        |       |        |      |  |
| ATOM       | 305 | CA   | VAL |   | 25 | 31.907 | 4.840 | 17.792 | 1.00 |  |
| 15.37      |     |      | C   |   |    |        |       |        |      |  |
| ATOM       | 306 | C    | VAL |   | 25 | 31.111 | 4.743 | 19.084 | 1.00 |  |
| 17.47      |     |      | C   |   |    |        |       |        |      |  |
| ATOM       | 307 | O    | VAL |   | 25 | 31.548 | 4.129 | 20.057 | 1.00 |  |
| 29.52      |     |      | O   |   |    |        |       |        |      |  |
| ATOM       | 308 | CB   | VAL |   | 25 | 31.476 | 3.725 | 16.843 | 1.00 |  |
| 23.36      |     |      | C   |   |    |        |       |        |      |  |
| ATOM       | 309 | CG1  | VAL |   | 25 | 29.962 | 3.826 | 16.614 | 1.00 |  |
| 58.39      |     |      | C   |   |    |        |       |        |      |  |
| ATOM       | 310 | CG2  | VAL |   | 25 | 32.211 | 3.878 | 15.508 | 1.00 |  |
| 55.25      |     |      | C   |   |    |        |       |        |      |  |
| ATOM       | 311 | HN   | VAL |   | 25 | 33.852 | 3.995 | 17.771 | 1.00 |  |
| 48.11      |     |      | H   |   |    |        |       |        |      |  |
| ATOM       | 312 | HA   | VAL |   | 25 | 31.685 | 5.789 | 17.325 | 1.00 |  |
| 9.25       |     |      | H   |   |    |        |       |        |      |  |
| ATOM       | 313 | HB   | VAL |   | 25 | 31.711 | 2.766 | 17.282 | 1.00 |  |
| 52.45      |     |      | H   |   |    |        |       |        |      |  |
| ATOM       | 314 | HG11 | VAL |   | 25 | 29.443 | 3.412 | 17.464 |      |  |
| 1.00171.07 |     |      |     | H |    |        |       |        |      |  |
| ATOM       | 315 | HG12 | VAL |   | 25 | 29.691 | 3.277 | 15.724 |      |  |
| 1.00166.22 |     |      |     | H |    |        |       |        |      |  |
| ATOM       | 316 | HG13 | VAL |   | 25 | 29.682 | 4.866 | 16.494 |      |  |
| 1.00134.76 |     |      |     | H |    |        |       |        |      |  |
| ATOM       | 317 | HG21 | VAL |   | 25 | 31.880 | 4.781 | 15.016 |      |  |
| 1.00141.88 |     |      |     | H |    |        |       |        |      |  |
| ATOM       | 318 | HG22 | VAL |   | 25 | 31.997 | 3.027 | 14.880 |      |  |
| 1.00184.50 |     |      |     | H |    |        |       |        |      |  |
| ATOM       | 319 | HG23 | VAL |   | 25 | 33.275 | 3.935 | 15.687 |      |  |
| 1.00133.90 |     |      |     | H |    |        |       |        |      |  |
| ATOM       | 320 | N    | THR |   | 26 | 29.941 | 5.375 | 19.084 | 1.00 |  |
| 13.60      |     |      | N   |   |    |        |       |        |      |  |
| ATOM       | 321 | CA   | THR |   | 26 | 29.068 | 5.393 | 20.255 | 1.00 |  |
| 21.19      |     |      | C   |   |    |        |       |        |      |  |
| ATOM       | 322 | C    | THR |   | 26 | 27.627 | 5.067 | 19.870 | 1.00 |  |
| 16.55      |     |      | C   |   |    |        |       |        |      |  |
| ATOM       | 323 | O    | THR |   | 26 | 27.154 | 5.457 | 18.802 | 1.00 |  |
| 11.43      |     |      | O   |   |    |        |       |        |      |  |
| ATOM       | 324 | CB   | THR |   | 26 | 29.131 | 6.779 | 20.889 | 1.00 |  |
| 27.07      |     |      | C   |   |    |        |       |        |      |  |
| ATOM       | 325 | CG2  | THR |   | 26 | 28.185 | 6.852 | 22.093 | 1.00 |  |

|            |     |      |     |    |        |        |        |      |     |
|------------|-----|------|-----|----|--------|--------|--------|------|-----|
| 44.39      |     |      |     |    |        |        |        |      |     |
| ATOM       | 326 | OG1  | THR | 26 | 30.461 | 7.029  | 21.321 | 1.00 |     |
| 34.75      |     |      | O   |    |        |        |        |      |     |
| ATOM       | 327 | HN   | THR | 26 | 29.662 | 5.857  | 18.277 | 1.00 |     |
| 10.81      |     |      | H   |    |        |        |        |      |     |
| ATOM       | 328 | HA   | THR | 26 | 29.410 | 4.665  | 20.977 | 1.00 |     |
| 33.16      |     |      | H   |    |        |        |        |      |     |
| ATOM       | 329 | HB   | THR | 26 | 28.844 | 7.518  | 20.151 | 1.00 |     |
| 20.60      |     |      | H   |    |        |        |        |      |     |
| ATOM       | 330 | HG1  | THR | 26 | 30.433 | 7.249  | 22.254 | 1.00 |     |
| 77.72      |     |      | H   |    |        |        |        |      |     |
| ATOM       | 331 | HG21 | THR | 26 | 28.333 | 7.789  | 22.607 |      |     |
| 1.00126.99 |     |      |     |    |        |        |        |      | H   |
| ATOM       | 332 | HG22 | THR | 26 | 28.397 | 6.035  | 22.766 |      |     |
| 1.00108.32 |     |      |     |    |        |        |        |      | H   |
| ATOM       | 333 | HG23 | THR | 26 | 27.161 | 6.786  | 21.758 |      |     |
| 1.00151.99 |     |      |     |    |        |        |        |      | H   |
| ATOM       | 334 | N    | ARG | 27 | 26.934 | 4.348  | 20.756 | 1.00 |     |
| 22.38      |     |      | N   |    |        |        |        |      |     |
| ATOM       | 335 | CA   | ARG | 27 | 25.537 | 3.966  | 20.523 | 1.00 |     |
| 20.21      |     |      | C   |    |        |        |        |      |     |
| ATOM       | 336 | C    | ARG | 27 | 24.697 | 4.270  | 21.759 | 1.00 |     |
| 16.96      |     |      | C   |    |        |        |        |      |     |
| ATOM       | 337 | O    | ARG | 27 | 25.236 | 4.488  | 22.844 | 1.00 |     |
| 20.06      |     |      | O   |    |        |        |        |      |     |
| ATOM       | 338 | CB   | ARG | 27 | 25.456 | 2.470  | 20.194 | 1.00 |     |
| 22.14      |     |      | C   |    |        |        |        |      |     |
| ATOM       | 339 | CG   | ARG | 27 | 25.939 | 1.647  | 21.391 |      |     |
| 1.00124.30 |     |      |     |    |        |        |        |      | C   |
| ATOM       | 340 | CD   | ARG | 27 | 25.972 | 0.166  | 21.011 |      |     |
| 1.00109.38 |     |      |     |    |        |        |        |      | C   |
| ATOM       | 341 | NE   | ARG | 27 | 26.411 | -0.637 | 22.146 |      |     |
| 1.00227.73 |     |      |     |    |        |        |        |      | N   |
| ATOM       | 342 | CZ   | ARG | 27 | 26.557 | -1.953 | 22.041 |      |     |
| 1.00426.12 |     |      |     |    |        |        |        |      | C   |
| ATOM       | 343 | NH1  | ARG | 27 | 26.953 | -2.651 | 23.071 |      |     |
| 1.00767.09 |     |      |     |    |        |        |        |      | N1+ |
| ATOM       | 344 | NH2  | ARG | 27 | 26.308 | -2.549 | 20.908 |      |     |
| 1.00581.78 |     |      |     |    |        |        |        |      | N   |
| ATOM       | 345 | HN   | ARG | 27 | 27.370 | 4.072  | 21.589 | 1.00 |     |
| 30.75      |     |      | H   |    |        |        |        |      |     |
| ATOM       | 346 | HA   | ARG | 27 | 25.142 | 4.528  | 19.687 | 1.00 |     |
| 23.13      |     |      | H   |    |        |        |        |      |     |
| ATOM       | 347 | HB1  | ARG | 27 | 26.079 | 2.257  | 19.338 | 1.00 |     |
| 87.46      |     |      | H   |    |        |        |        |      |     |
| ATOM       | 348 | HB2  | ARG | 27 | 24.432 | 2.209  | 19.967 |      |     |
| 1.00103.36 |     |      |     |    |        |        |        |      | H   |
| ATOM       | 349 | HG1  | ARG | 27 | 25.265 | 1.787  | 22.223 |      |     |
| 1.00281.97 |     |      |     |    |        |        |        |      | H   |
| ATOM       | 350 | HG2  | ARG | 27 | 26.930 | 1.970  | 21.674 |      |     |
| 1.00276.19 |     |      |     |    |        |        |        |      | H   |
| ATOM       | 351 | HD1  | ARG | 27 | 26.652 | 0.025  | 20.185 |      |     |

|            |     |      |     |   |    |        |        |        |      |  |
|------------|-----|------|-----|---|----|--------|--------|--------|------|--|
| 1.00183.60 |     |      |     | H |    |        |        |        |      |  |
| ATOM       | 352 | HD2  | ARG |   | 27 | 24.982 | -0.148 | 20.715 |      |  |
| 1.00142.93 |     |      |     | H |    |        |        |        |      |  |
| ATOM       | 353 | HE   | ARG |   | 27 | 26.601 | -0.198 | 23.002 |      |  |
| 1.00372.53 |     |      |     | H |    |        |        |        |      |  |
| ATOM       | 354 | HH11 | ARG |   | 27 | 27.144 | -2.194 | 23.939 |      |  |
| 1.00910.59 |     |      |     | H |    |        |        |        |      |  |
| ATOM       | 355 | HH12 | ARG |   | 27 | 27.062 | -3.641 | 22.990 |      |  |
| 1.00999.99 |     |      |     | H |    |        |        |        |      |  |
| ATOM       | 356 | HH21 | ARG |   | 27 | 26.005 | -2.015 | 20.118 |      |  |
| 1.00532.54 |     |      |     | H |    |        |        |        |      |  |
| ATOM       | 357 | HH22 | ARG |   | 27 | 26.418 | -3.540 | 20.827 |      |  |
| 1.00948.84 |     |      |     | H |    |        |        |        |      |  |
| ATOM       | 358 | N    | SER |   | 28 | 23.374 | 4.292  | 21.594 | 1.00 |  |
| 14.60      |     |      | N   |   |    |        |        |        |      |  |
| ATOM       | 359 | CA   | SER |   | 28 | 22.476 | 4.583  | 22.712 | 1.00 |  |
| 14.92      |     |      | C   |   |    |        |        |        |      |  |
| ATOM       | 360 | C    | SER |   | 28 | 21.149 | 3.847  | 22.556 | 1.00 |  |
| 12.12      |     |      | C   |   |    |        |        |        |      |  |
| ATOM       | 361 | O    | SER |   | 28 | 20.696 | 3.586  | 21.441 | 1.00 |  |
| 13.41      |     |      | O   |   |    |        |        |        |      |  |
| ATOM       | 362 | CB   | SER |   | 28 | 22.216 | 6.087  | 22.793 | 1.00 |  |
| 23.26      |     |      | C   |   |    |        |        |        |      |  |
| ATOM       | 363 | OG   | SER |   | 28 | 21.359 | 6.356  | 23.894 |      |  |
| 1.00146.32 |     |      |     | O |    |        |        |        |      |  |
| ATOM       | 364 | HN   | SER |   | 28 | 22.995 | 4.117  | 20.706 | 1.00 |  |
| 15.23      |     |      | H   |   |    |        |        |        |      |  |
| ATOM       | 365 | HA   | SER |   | 28 | 22.941 | 4.263  | 23.634 | 1.00 |  |
| 15.44      |     |      | H   |   |    |        |        |        |      |  |
| ATOM       | 366 | HB1  | SER |   | 28 | 21.755 | 6.422  | 21.874 | 1.00 |  |
| 88.73      |     |      | H   |   |    |        |        |        |      |  |
| ATOM       | 367 | HB2  | SER |   | 28 | 23.149 | 6.609  | 22.934 |      |  |
| 1.00124.68 |     |      |     | H |    |        |        |        |      |  |
| ATOM       | 368 | HG   | SER |   | 28 | 21.830 | 6.929  | 24.504 |      |  |
| 1.00242.47 |     |      |     | H |    |        |        |        |      |  |
| ATOM       | 369 | N    | CYS |   | 29 | 20.530 | 3.524  | 23.687 | 1.00 |  |
| 10.48      |     |      | N   |   |    |        |        |        |      |  |
| ATOM       | 370 | CA   | CYS |   | 29 | 19.251 | 2.823  | 23.688 | 1.00 |  |
| 9.97       |     |      | C   |   |    |        |        |        |      |  |
| ATOM       | 371 | C    | CYS |   | 29 | 18.687 | 2.803  | 25.108 | 1.00 |  |
| 11.60      |     |      | C   |   |    |        |        |        |      |  |
| ATOM       | 372 | O    | CYS |   | 29 | 19.415 | 2.540  | 26.064 | 1.00 |  |
| 15.64      |     |      | O   |   |    |        |        |        |      |  |
| ATOM       | 373 | CB   | CYS |   | 29 | 19.438 | 1.389  | 23.157 | 1.00 |  |
| 9.52       |     |      | C   |   |    |        |        |        |      |  |
| ATOM       | 374 | SG   | CYS |   | 29 | 17.959 | 0.860  | 22.282 | 1.00 |  |
| 10.40      |     |      | S   |   |    |        |        |        |      |  |
| ATOM       | 375 | HN   | CYS |   | 29 | 20.939 | 3.767  | 24.543 | 1.00 |  |
| 11.10      |     |      | H   |   |    |        |        |        |      |  |
| ATOM       | 376 | HA   | CYS |   | 29 | 18.564 | 3.351  | 23.045 | 1.00 |  |
| 11.08      |     |      | H   |   |    |        |        |        |      |  |
| ATOM       | 377 | HB1  | CYS |   | 29 | 19.620 | 0.705  | 23.976 | 1.00 |  |

|            |     |     |     |     |        |        |        |      |
|------------|-----|-----|-----|-----|--------|--------|--------|------|
| 9.33       |     |     | H   |     |        |        |        |      |
| ATOM       | 378 | HB2 | CYS | 29  | 20.276 | 1.359  | 22.480 | 1.00 |
| 10.78      |     |     | H   |     |        |        |        |      |
| ATOM       | 379 | N   | GLU | 30  | 17.393 | 3.100  | 25.247 | 1.00 |
| 13.52      |     |     | N   |     |        |        |        |      |
| ATOM       | 380 | CA  | GLU | 30  | 16.753 | 3.130  | 26.569 | 1.00 |
| 17.41      |     |     | C   |     |        |        |        |      |
| ATOM       | 381 | C   | GLU | 30  | 15.733 | 2.007  | 26.717 | 1.00 |
| 10.81      |     |     | C   |     |        |        |        |      |
| ATOM       | 382 | O   | GLU | 30  | 14.933 | 1.754  | 25.815 | 1.00 |
| 23.22      |     |     | O   |     |        |        |        |      |
| ATOM       | 383 | CB  | GLU | 30  | 16.055 | 4.477  | 26.768 | 1.00 |
| 37.83      |     |     | C   |     |        |        |        |      |
| ATOM       | 384 | CG  | GLU | 30  | 17.091 | 5.599  | 26.690 |      |
| 1.00108.13 |     |     |     | C   |        |        |        |      |
| ATOM       | 385 | CD  | GLU | 30  | 17.997 | 5.561  | 27.916 |      |
| 1.00240.52 |     |     |     | C   |        |        |        |      |
| ATOM       | 386 | OE1 | GLU | 30  | 19.033 | 6.203  | 27.883 |      |
| 1.00422.56 |     |     |     | O   |        |        |        |      |
| ATOM       | 387 | OE2 | GLU | 30  | 17.640 | 4.892  | 28.871 |      |
| 1.00410.81 |     |     |     | O1- |        |        |        |      |
| ATOM       | 388 | HN  | GLU | 30  | 16.859 | 3.314  | 24.451 | 1.00 |
| 15.61      |     |     | H   |     |        |        |        |      |
| ATOM       | 389 | HA  | GLU | 30  | 17.504 | 3.016  | 27.339 | 1.00 |
| 24.60      |     |     | H   |     |        |        |        |      |
| ATOM       | 390 | HB1 | GLU | 30  | 15.581 | 4.495  | 27.738 | 1.00 |
| 72.67      |     |     | H   |     |        |        |        |      |
| ATOM       | 391 | HB2 | GLU | 30  | 15.312 | 4.615  | 25.998 | 1.00 |
| 56.47      |     |     | H   |     |        |        |        |      |
| ATOM       | 392 | HG1 | GLU | 30  | 16.585 | 6.552  | 26.646 |      |
| 1.00196.66 |     |     |     | H   |        |        |        |      |
| ATOM       | 393 | HG2 | GLU | 30  | 17.690 | 5.470  | 25.800 |      |
| 1.00140.67 |     |     |     | H   |        |        |        |      |
| ATOM       | 394 | N   | LYS | 31  | 15.765 | 1.342  | 27.870 | 1.00 |
| 11.96      |     |     | N   |     |        |        |        |      |
| ATOM       | 395 | CA  | LYS | 31  | 14.838 | 0.251  | 28.152 | 1.00 |
| 11.40      |     |     | C   |     |        |        |        |      |
| ATOM       | 396 | C   | LYS | 31  | 13.563 | 0.794  | 28.781 | 1.00 |
| 10.99      |     |     | C   |     |        |        |        |      |
| ATOM       | 397 | O   | LYS | 31  | 13.600 | 1.760  | 29.545 | 1.00 |
| 12.86      |     |     | O   |     |        |        |        |      |
| ATOM       | 398 | CB  | LYS | 31  | 15.490 | -0.755 | 29.102 | 1.00 |
| 21.40      |     |     | C   |     |        |        |        |      |
| ATOM       | 399 | CG  | LYS | 31  | 16.696 | -1.398 | 28.417 | 1.00 |
| 57.81      |     |     | C   |     |        |        |        |      |
| ATOM       | 400 | CD  | LYS | 31  | 17.348 | -2.404 | 29.369 |      |
| 1.00115.52 |     |     |     | C   |        |        |        |      |
| ATOM       | 401 | CE  | LYS | 31  | 18.557 | -3.044 | 28.684 |      |
| 1.00250.23 |     |     |     | C   |        |        |        |      |
| ATOM       | 402 | NZ  | LYS | 31  | 19.197 | -4.016 | 29.615 |      |
| 1.00462.10 |     |     |     | N1+ |        |        |        |      |
| ATOM       | 403 | HN  | LYS | 31  | 16.423 | 1.599  | 28.551 | 1.00 |



|            |     |      |     |    |        |        |        |      |   |
|------------|-----|------|-----|----|--------|--------|--------|------|---|
| 26.13      |     |      | H   |    |        |        |        |      |   |
| ATOM       | 404 | HA   | LYS | 31 | 14.589 | -0.253 | 27.230 | 1.00 |   |
| 13.87      |     |      | H   |    |        |        |        |      |   |
| ATOM       | 405 | HB1  | LYS | 31 | 14.774 | -1.520 | 29.362 | 1.00 |   |
| 37.63      |     |      | H   |    |        |        |        |      |   |
| ATOM       | 406 | HB2  | LYS | 31 | 15.813 | -0.244 | 29.998 | 1.00 |   |
| 47.19      |     |      | H   |    |        |        |        |      |   |
| ATOM       | 407 | HG1  | LYS | 31 | 17.413 | -0.634 | 28.158 |      |   |
| 1.00126.32 |     |      |     |    |        |        |        |      | H |
| ATOM       | 408 | HG2  | LYS | 31 | 16.372 | -1.906 | 27.521 |      |   |
| 1.00114.19 |     |      |     |    |        |        |        |      | H |
| ATOM       | 409 | HD1  | LYS | 31 | 16.634 | -3.172 | 29.625 |      |   |
| 1.00198.45 |     |      |     |    |        |        |        |      | H |
| ATOM       | 410 | HD2  | LYS | 31 | 17.669 | -1.895 | 30.265 |      |   |
| 1.00200.14 |     |      |     |    |        |        |        |      | H |
| ATOM       | 411 | HE1  | LYS | 31 | 19.269 | -2.276 | 28.420 |      |   |
| 1.00374.64 |     |      |     |    |        |        |        |      | H |
| ATOM       | 412 | HE2  | LYS | 31 | 18.233 | -3.559 | 27.791 |      |   |
| 1.00403.27 |     |      |     |    |        |        |        |      | H |
| ATOM       | 413 | HZ1  | LYS | 31 | 19.400 | -4.900 | 29.106 |      |   |
| 1.00627.38 |     |      |     |    |        |        |        |      | H |
| ATOM       | 414 | HZ2  | LYS | 31 | 18.553 | -4.211 | 30.407 |      |   |
| 1.00622.26 |     |      |     |    |        |        |        |      | H |
| ATOM       | 415 | HZ3  | LYS | 31 | 20.084 | -3.616 | 29.977 |      |   |
| 1.00619.20 |     |      |     |    |        |        |        |      | H |
| ATOM       | 416 | N    | THR | 32 | 12.430 | 0.175  | 28.458 | 1.00 |   |
| 15.51      |     |      | N   |    |        |        |        |      |   |
| ATOM       | 417 | CA   | THR | 32 | 11.144 | 0.612  | 29.001 | 1.00 |   |
| 22.44      |     |      | C   |    |        |        |        |      |   |
| ATOM       | 418 | C    | THR | 32 | 10.797 | -0.176 | 30.259 | 1.00 |   |
| 26.60      |     |      | C   |    |        |        |        |      |   |
| ATOM       | 419 | O    | THR | 32 | 10.361 | -1.326 | 30.185 | 1.00 |   |
| 57.43      |     |      | O   |    |        |        |        |      |   |
| ATOM       | 420 | CB   | THR | 32 | 10.045 | 0.415  | 27.955 | 1.00 |   |
| 56.28      |     |      | C   |    |        |        |        |      |   |
| ATOM       | 421 | CG2  | THR | 32 | 8.704  | 0.868  | 28.531 |      |   |
| 1.00102.70 |     |      |     |    |        |        |        |      | C |
| ATOM       | 422 | OG1  | THR | 32 | 10.351 | 1.182  | 26.799 |      |   |
| 1.00111.17 |     |      |     |    |        |        |        |      | O |
| ATOM       | 423 | HN   | THR | 32 | 12.457 | -0.589 | 27.843 | 1.00 |   |
| 18.79      |     |      | H   |    |        |        |        |      |   |
| ATOM       | 424 | HA   | THR | 32 | 11.198 | 1.663  | 29.251 | 1.00 |   |
| 19.67      |     |      | H   |    |        |        |        |      |   |
| ATOM       | 425 | HB   | THR | 32 | 9.982  | -0.629 | 27.688 | 1.00 |   |
| 84.25      |     |      | H   |    |        |        |        |      |   |
| ATOM       | 426 | HG1  | THR | 32 | 10.233 | 2.110  | 27.019 |      |   |
| 1.00205.03 |     |      |     |    |        |        |        |      | H |
| ATOM       | 427 | HG21 | THR | 32 | 8.816  | 1.841  | 28.987 |      |   |
| 1.00220.71 |     |      |     |    |        |        |        |      | H |
| ATOM       | 428 | HG22 | THR | 32 | 8.372  | 0.158  | 29.275 |      |   |
| 1.00174.67 |     |      |     |    |        |        |        |      | H |
| ATOM       | 429 | HG23 | THR | 32 | 7.971  | 0.925  | 27.738 |      |   |

|            |     |      |     |    |        |        |        |      |  |
|------------|-----|------|-----|----|--------|--------|--------|------|--|
| 1.00217.44 |     |      |     | H  |        |        |        |      |  |
| ATOM       | 430 | N    | THR | 33 | 10.982 | 0.459  | 31.413 | 1.00 |  |
| 22.47      |     |      | N   |    |        |        |        |      |  |
| ATOM       | 431 | CA   | THR | 33 | 10.677 | -0.173 | 32.698 | 1.00 |  |
| 41.60      |     |      | C   |    |        |        |        |      |  |
| ATOM       | 432 | C    | THR | 33 | 10.047 | 0.822  | 33.625 | 1.00 |  |
| 38.03      |     |      | C   |    |        |        |        |      |  |
| ATOM       | 433 | O    | THR | 33 | 10.594 | 1.892  | 33.887 | 1.00 |  |
| 52.73      |     |      | O   |    |        |        |        |      |  |
| ATOM       | 434 | CB   | THR | 33 | 11.943 | -0.733 | 33.337 | 1.00 |  |
| 63.25      |     |      | C   |    |        |        |        |      |  |
| ATOM       | 435 | CG2  | THR | 33 | 11.567 | -1.615 | 34.528 |      |  |
| 1.00121.65 |     |      |     | C  |        |        |        |      |  |
| ATOM       | 436 | OG1  | THR | 33 | 12.656 | -1.508 | 32.382 | 1.00 |  |
| 96.20      |     |      | O   |    |        |        |        |      |  |
| ATOM       | 437 | HN   | THR | 33 | 11.323 | 1.376  | 31.403 | 1.00 |  |
| 23.82      |     |      | H   |    |        |        |        |      |  |
| ATOM       | 438 | HA   | THR | 33 | 9.971  | -0.968 | 32.564 | 1.00 |  |
| 67.12      |     |      | H   |    |        |        |        |      |  |
| ATOM       | 439 | HB   | THR | 33 | 12.556 | 0.080  | 33.680 |      |  |
| 1.00107.59 |     |      |     | H  |        |        |        |      |  |
| ATOM       | 440 | HG1  | THR | 33 | 12.549 | -2.433 | 32.610 |      |  |
| 1.00176.27 |     |      |     | H  |        |        |        |      |  |
| ATOM       | 441 | HG21 | THR | 33 | 10.969 | -2.446 | 34.187 |      |  |
| 1.00255.23 |     |      |     | H  |        |        |        |      |  |
| ATOM       | 442 | HG22 | THR | 33 | 11.000 | -1.034 | 35.242 |      |  |
| 1.00245.37 |     |      |     | H  |        |        |        |      |  |
| ATOM       | 443 | HG23 | THR | 33 | 12.465 | -1.986 | 34.999 |      |  |
| 1.00185.78 |     |      |     | H  |        |        |        |      |  |
| ATOM       | 444 | N    | GLY | 34 | 8.892  | 0.446  | 34.131 | 1.00 |  |
| 40.93      |     |      | N   |    |        |        |        |      |  |
| ATOM       | 445 | CA   | GLY | 34 | 8.183  | 1.295  | 35.044 | 1.00 |  |
| 45.59      |     |      | C   |    |        |        |        |      |  |
| ATOM       | 446 | C    | GLY | 34 | 7.660  | 2.539  | 34.333 | 1.00 |  |
| 40.97      |     |      | C   |    |        |        |        |      |  |
| ATOM       | 447 | O    | GLY | 34 | 6.451  | 2.737  | 34.209 | 1.00 |  |
| 82.17      |     |      | O   |    |        |        |        |      |  |
| ATOM       | 448 | HN   | GLY | 34 | 8.523  | -0.426 | 33.889 | 1.00 |  |
| 54.00      |     |      | H   |    |        |        |        |      |  |
| ATOM       | 449 | HA1  | GLY | 34 | 8.870  | 1.583  | 35.806 | 1.00 |  |
| 54.41      |     |      | H   |    |        |        |        |      |  |
| ATOM       | 450 | HA2  | GLY | 34 | 7.359  | 0.750  | 35.482 | 1.00 |  |
| 62.09      |     |      | H   |    |        |        |        |      |  |
| ATOM       | 451 | N    | ASN | 35 | 8.586  | 3.373  | 33.855 | 1.00 |  |
| 32.51      |     |      | N   |    |        |        |        |      |  |
| ATOM       | 452 | CA   | ASN | 35 | 8.231  | 4.601  | 33.140 | 1.00 |  |
| 33.20      |     |      | C   |    |        |        |        |      |  |
| ATOM       | 453 | C    | ASN | 35 | 8.860  | 4.595  | 31.749 | 1.00 |  |
| 23.17      |     |      | C   |    |        |        |        |      |  |
| ATOM       | 454 | O    | ASN | 35 | 9.950  | 4.056  | 31.555 | 1.00 |  |
| 27.01      |     |      | O   |    |        |        |        |      |  |
| ATOM       | 455 | CB   | ASN | 35 | 8.727  | 5.820  | 33.918 | 1.00 |  |

|            |     |      |     |    |       |       |        |      |   |
|------------|-----|------|-----|----|-------|-------|--------|------|---|
| 54.51      |     |      | C   |    |       |       |        |      |   |
| ATOM       | 456 | CG   | ASN | 35 | 8.077 | 5.858 | 35.298 | 1.00 |   |
| 80.73      |     |      | C   |    |       |       |        |      |   |
| ATOM       | 457 | ND2  | ASN | 35 | 8.804 | 6.145 | 36.343 |      |   |
| 1.00220.46 |     |      |     |    |       |       |        |      | N |
| ATOM       | 458 | OD1  | ASN | 35 | 6.878 | 5.618 | 35.426 |      |   |
| 1.00117.80 |     |      |     |    |       |       |        |      | O |
| ATOM       | 459 | HN   | ASN | 35 | 9.533 | 3.155 | 33.981 | 1.00 |   |
| 51.15      |     |      | H   |    |       |       |        |      |   |
| ATOM       | 460 | HA   | ASN | 35 | 7.157 | 4.666 | 33.036 | 1.00 |   |
| 47.21      |     |      | H   |    |       |       |        |      |   |
| ATOM       | 461 | HB1  | ASN | 35 | 8.469 | 6.720 | 33.377 | 1.00 |   |
| 68.31      |     |      | H   |    |       |       |        |      |   |
| ATOM       | 462 | HB2  | ASN | 35 | 9.800 | 5.762 | 34.028 | 1.00 |   |
| 57.75      |     |      | H   |    |       |       |        |      |   |
| ATOM       | 463 | HD21 | ASN | 35 | 9.759 | 6.335 | 36.239 |      |   |
| 1.00405.39 |     |      |     |    |       |       |        |      | H |
| ATOM       | 464 | HD22 | ASN | 35 | 8.393 | 6.171 | 37.232 |      |   |
| 1.00245.64 |     |      |     |    |       |       |        |      | H |
| ATOM       | 465 | N    | PHE | 36 | 8.168 | 5.191 | 30.785 | 1.00 |   |
| 35.72      |     |      | N   |    |       |       |        |      |   |
| ATOM       | 466 | CA   | PHE | 36 | 8.666 | 5.245 | 29.420 | 1.00 |   |
| 33.41      |     |      | C   |    |       |       |        |      |   |
| ATOM       | 467 | C    | PHE | 36 | 9.818 | 6.237 | 29.300 | 1.00 |   |
| 28.51      |     |      | C   |    |       |       |        |      |   |
| ATOM       | 468 | O    | PHE | 36 | 9.841 | 7.262 | 29.981 | 1.00 |   |
| 45.23      |     |      | O   |    |       |       |        |      |   |
| ATOM       | 469 | CB   | PHE | 36 | 7.531 | 5.653 | 28.483 | 1.00 |   |
| 67.53      |     |      | C   |    |       |       |        |      |   |
| ATOM       | 470 | CG   | PHE | 36 | 6.535 | 4.522 | 28.373 | 1.00 |   |
| 86.71      |     |      | C   |    |       |       |        |      |   |
| ATOM       | 471 | CD1  | PHE | 36 | 5.462 | 4.447 | 29.268 |      |   |
| 1.00106.51 |     |      |     |    |       |       |        |      | C |
| ATOM       | 472 | CD2  | PHE | 36 | 6.686 | 3.549 | 27.378 | 1.00 |   |
| 99.48      |     |      | C   |    |       |       |        |      |   |
| ATOM       | 473 | CE1  | PHE | 36 | 4.539 | 3.399 | 29.169 |      |   |
| 1.00134.48 |     |      |     |    |       |       |        |      | C |
| ATOM       | 474 | CE2  | PHE | 36 | 5.764 | 2.502 | 27.277 |      |   |
| 1.00134.27 |     |      |     |    |       |       |        |      | C |
| ATOM       | 475 | CZ   | PHE | 36 | 4.690 | 2.427 | 28.173 |      |   |
| 1.00149.48 |     |      |     |    |       |       |        |      | C |
| ATOM       | 476 | HN   | PHE | 36 | 7.304 | 5.602 | 30.993 | 1.00 |   |
| 62.87      |     |      | H   |    |       |       |        |      |   |
| ATOM       | 477 | HA   | PHE | 36 | 9.016 | 4.263 | 29.135 | 1.00 |   |
| 28.53      |     |      | H   |    |       |       |        |      |   |
| ATOM       | 478 | HB1  | PHE | 36 | 7.933 | 5.873 | 27.510 | 1.00 |   |
| 73.56      |     |      | H   |    |       |       |        |      |   |
| ATOM       | 479 | HB2  | PHE | 36 | 7.039 | 6.530 | 28.875 | 1.00 |   |
| 88.42      |     |      | H   |    |       |       |        |      |   |
| ATOM       | 480 | HD1  | PHE | 36 | 5.346 | 5.197 | 30.038 |      |   |
| 1.00110.20 |     |      |     |    |       |       |        |      | H |
| ATOM       | 481 | HD2  | PHE | 36 | 7.515 | 3.607 | 26.687 | 1.00 |   |

|            |     |      |     |    |        |       |        |      |  |
|------------|-----|------|-----|----|--------|-------|--------|------|--|
| 93.07      |     |      | H   |    |        |       |        |      |  |
| ATOM       | 482 | HE1  | PHE | 36 | 3.710  | 3.341 | 29.860 |      |  |
| 1.00155.06 |     |      | H   |    |        |       |        |      |  |
| ATOM       | 483 | HE2  | PHE | 36 | 5.879  | 1.752 | 26.509 |      |  |
| 1.00159.46 |     |      | H   |    |        |       |        |      |  |
| ATOM       | 484 | HZ   | PHE | 36 | 3.977  | 1.619 | 28.096 |      |  |
| 1.00183.25 |     |      | H   |    |        |       |        |      |  |
| ATOM       | 485 | N    | THR | 37 | 10.771 | 5.926 | 28.424 | 1.00 |  |
| 20.06      |     |      | N   |    |        |       |        |      |  |
| ATOM       | 486 | CA   | THR | 37 | 11.924 | 6.794 | 28.212 | 1.00 |  |
| 27.18      |     |      | C   |    |        |       |        |      |  |
| ATOM       | 487 | C    | THR | 37 | 12.505 | 6.575 | 26.819 | 1.00 |  |
| 41.87      |     |      | C   |    |        |       |        |      |  |
| ATOM       | 488 | O    | THR | 37 | 12.887 | 5.462 | 26.456 |      |  |
| 1.00169.86 |     |      | O   |    |        |       |        |      |  |
| ATOM       | 489 | CB   | THR | 37 | 12.994 | 6.512 | 29.271 | 1.00 |  |
| 26.52      |     |      | C   |    |        |       |        |      |  |
| ATOM       | 490 | CG2  | THR | 37 | 13.131 | 5.003 | 29.483 | 1.00 |  |
| 75.69      |     |      | C   |    |        |       |        |      |  |
| ATOM       | 491 | OG1  | THR | 37 | 14.236 | 7.052 | 28.845 | 1.00 |  |
| 81.95      |     |      | O   |    |        |       |        |      |  |
| ATOM       | 492 | HN   | THR | 37 | 10.696 | 5.099 | 27.907 | 1.00 |  |
| 18.47      |     |      | H   |    |        |       |        |      |  |
| ATOM       | 493 | HA   | THR | 37 | 11.611 | 7.824 | 28.300 | 1.00 |  |
| 38.80      |     |      | H   |    |        |       |        |      |  |
| ATOM       | 494 | HB   | THR | 37 | 12.704 | 6.975 | 30.204 | 1.00 |  |
| 81.60      |     |      | H   |    |        |       |        |      |  |
| ATOM       | 495 | HG1  | THR | 37 | 14.065 | 7.640 | 28.104 |      |  |
| 1.00188.80 |     |      | H   |    |        |       |        |      |  |
| ATOM       | 496 | HG21 | THR | 37 | 13.381 | 4.527 | 28.547 |      |  |
| 1.00196.98 |     |      | H   |    |        |       |        |      |  |
| ATOM       | 497 | HG22 | THR | 37 | 12.197 | 4.604 | 29.851 |      |  |
| 1.00196.23 |     |      | H   |    |        |       |        |      |  |
| ATOM       | 498 | HG23 | THR | 37 | 13.913 | 4.811 | 30.204 |      |  |
| 1.00168.92 |     |      | H   |    |        |       |        |      |  |
| ATOM       | 499 | N    | GLU | 38 | 12.562 | 7.650 | 26.039 | 1.00 |  |
| 26.53      |     |      | N   |    |        |       |        |      |  |
| ATOM       | 500 | CA   | GLU | 38 | 13.090 | 7.583 | 24.678 | 1.00 |  |
| 30.29      |     |      | C   |    |        |       |        |      |  |
| ATOM       | 501 | C    | GLU | 38 | 14.602 | 7.799 | 24.669 | 1.00 |  |
| 25.39      |     |      | C   |    |        |       |        |      |  |
| ATOM       | 502 | O    | GLU | 38 | 15.179 | 8.266 | 25.651 | 1.00 |  |
| 51.60      |     |      | O   |    |        |       |        |      |  |
| ATOM       | 503 | CB   | GLU | 38 | 12.420 | 8.651 | 23.810 | 1.00 |  |
| 54.82      |     |      | C   |    |        |       |        |      |  |
| ATOM       | 504 | CG   | GLU | 38 | 10.908 | 8.422 | 23.793 |      |  |
| 1.00165.84 |     |      | C   |    |        |       |        |      |  |
| ATOM       | 505 | CD   | GLU | 38 | 10.587 | 7.108 | 23.090 |      |  |
| 1.00292.92 |     |      | C   |    |        |       |        |      |  |
| ATOM       | 506 | OE1  | GLU | 38 | 9.503  | 6.591 | 23.309 |      |  |
| 1.00414.19 |     |      | O   |    |        |       |        |      |  |
| ATOM       | 507 | OE2  | GLU | 38 | 11.430 | 6.637 | 22.343 |      |  |

|            |     |     |     |     |        |        |        |      |  |
|------------|-----|-----|-----|-----|--------|--------|--------|------|--|
| 1.00537.65 |     |     |     | O1- |        |        |        |      |  |
| ATOM       | 508 | HN  | GLU | 38  | 12.234 | 8.504  | 26.386 | 1.00 |  |
| 84.50      |     |     | H   |     |        |        |        |      |  |
| ATOM       | 509 | HA  | GLU | 38  | 12.872 | 6.612  | 24.259 | 1.00 |  |
| 32.15      |     |     | H   |     |        |        |        |      |  |
| ATOM       | 510 | HB1 | GLU | 38  | 12.804 | 8.588  | 22.802 |      |  |
| 1.00144.82 |     |     |     | H   |        |        |        |      |  |
| ATOM       | 511 | HB2 | GLU | 38  | 12.633 | 9.630  | 24.215 |      |  |
| 1.00106.49 |     |     |     | H   |        |        |        |      |  |
| ATOM       | 512 | HG1 | GLU | 38  | 10.428 | 9.234  | 23.266 |      |  |
| 1.00303.31 |     |     |     | H   |        |        |        |      |  |
| ATOM       | 513 | HG2 | GLU | 38  | 10.540 | 8.387  | 24.808 |      |  |
| 1.00323.99 |     |     |     | H   |        |        |        |      |  |
| ATOM       | 514 | N   | CYS | 39  | 15.231 | 7.461  | 23.549 | 1.00 |  |
| 15.84      |     |     | N   |     |        |        |        |      |  |
| ATOM       | 515 | CA  | CYS | 39  | 16.675 | 7.625  | 23.407 | 1.00 |  |
| 14.30      |     |     | C   |     |        |        |        |      |  |
| ATOM       | 516 | C   | CYS | 39  | 17.043 | 9.111  | 23.489 | 1.00 |  |
| 22.31      |     |     | C   |     |        |        |        |      |  |
| ATOM       | 517 | O   | CYS | 39  | 16.242 | 9.966  | 23.113 | 1.00 |  |
| 32.92      |     |     | O   |     |        |        |        |      |  |
| ATOM       | 518 | CB  | CYS | 39  | 17.121 | 7.054  | 22.058 | 1.00 |  |
| 18.08      |     |     | C   |     |        |        |        |      |  |
| ATOM       | 519 | SG  | CYS | 39  | 16.069 | 7.725  | 20.746 | 1.00 |  |
| 17.41      |     |     | S   |     |        |        |        |      |  |
| ATOM       | 520 | HN  | CYS | 39  | 14.716 | 7.102  | 22.799 | 1.00 |  |
| 24.87      |     |     | H   |     |        |        |        |      |  |
| ATOM       | 521 | HA  | CYS | 39  | 17.165 | 7.081  | 24.198 | 1.00 |  |
| 14.60      |     |     | H   |     |        |        |        |      |  |
| ATOM       | 522 | HB1 | CYS | 39  | 17.035 | 5.979  | 22.075 | 1.00 |  |
| 27.71      |     |     | H   |     |        |        |        |      |  |
| ATOM       | 523 | HB2 | CYS | 39  | 18.148 | 7.329  | 21.871 | 1.00 |  |
| 34.91      |     |     | H   |     |        |        |        |      |  |
| ATOM       | 524 | N   | PRO | 40  | 18.222 | 9.445  | 23.970 | 1.00 |  |
| 27.27      |     |     | N   |     |        |        |        |      |  |
| ATOM       | 525 | CA  | PRO | 40  | 18.655 | 10.867 | 24.084 | 1.00 |  |
| 47.66      |     |     | C   |     |        |        |        |      |  |
| ATOM       | 526 | C   | PRO | 40  | 19.034 | 11.456 | 22.727 | 1.00 |  |
| 71.54      |     |     | C   |     |        |        |        |      |  |
| ATOM       | 527 | O   | PRO | 40  | 19.686 | 10.805 | 21.912 | 1.00 |  |
| 87.70      |     |     | O   |     |        |        |        |      |  |
| ATOM       | 528 | CB  | PRO | 40  | 19.866 | 10.794 | 25.021 | 1.00 |  |
| 53.85      |     |     | C   |     |        |        |        |      |  |
| ATOM       | 529 | CG  | PRO | 40  | 20.452 | 9.444  | 24.765 | 1.00 |  |
| 46.04      |     |     | C   |     |        |        |        |      |  |
| ATOM       | 530 | CD  | PRO | 40  | 19.268 | 8.523  | 24.447 | 1.00 |  |
| 25.70      |     |     | C   |     |        |        |        |      |  |
| ATOM       | 531 | HA  | PRO | 40  | 17.878 | 11.458 | 24.541 | 1.00 |  |
| 58.04      |     |     | H   |     |        |        |        |      |  |
| ATOM       | 532 | HB1 | PRO | 40  | 19.551 | 10.870 | 26.051 | 1.00 |  |
| 67.93      |     |     | H   |     |        |        |        |      |  |
| ATOM       | 533 | HB2 | PRO | 40  | 20.580 | 11.574 | 24.787 | 1.00 |  |

|            |     |      |     |    |        |        |        |      |
|------------|-----|------|-----|----|--------|--------|--------|------|
| 70.99      |     |      | H   |    |        |        |        |      |
| ATOM       | 534 | HG1  | PRO | 40 | 20.971 | 9.085  | 25.642 | 1.00 |
| 65.91      |     |      | H   |    |        |        |        |      |
| ATOM       | 535 | HG2  | PRO | 40 | 21.133 | 9.490  | 23.923 | 1.00 |
| 54.99      |     |      | H   |    |        |        |        |      |
| ATOM       | 536 | HD1  | PRO | 40 | 18.937 | 8.010  | 25.337 | 1.00 |
| 24.22      |     |      | H   |    |        |        |        |      |
| ATOM       | 537 | HD2  | PRO | 40 | 19.534 | 7.820  | 23.674 | 1.00 |
| 26.94      |     |      | H   |    |        |        |        |      |
| ATOM       | 538 | N    | GLY | 41 | 18.622 | 12.697 | 22.501 |      |
| 1.00105.24 |     |      |     | N  |        |        |        |      |
| ATOM       | 539 | CA   | GLY | 41 | 18.917 | 13.390 | 21.247 |      |
| 1.00147.55 |     |      |     | C  |        |        |        |      |
| ATOM       | 540 | C    | GLY | 41 | 20.184 | 14.227 | 21.372 |      |
| 1.00161.74 |     |      |     | C  |        |        |        |      |
| ATOM       | 541 | O    | GLY | 41 | 20.594 | 14.894 | 20.422 |      |
| 1.00244.37 |     |      |     | O  |        |        |        |      |
| ATOM       | 542 | HN   | GLY | 41 | 18.111 | 13.159 | 23.195 |      |
| 1.00121.79 |     |      |     | H  |        |        |        |      |
| ATOM       | 543 | HA1  | GLY | 41 | 18.091 | 14.040 | 21.000 |      |
| 1.00184.40 |     |      |     | H  |        |        |        |      |
| ATOM       | 544 | HA2  | GLY | 41 | 19.045 | 12.664 | 20.455 |      |
| 1.00157.34 |     |      |     | H  |        |        |        |      |
| ATOM       | 545 | N    | LEU | 42 | 20.802 | 14.189 | 22.553 |      |
| 1.00162.48 |     |      |     | N  |        |        |        |      |
| ATOM       | 546 | CA   | LEU | 42 | 22.027 | 14.954 | 22.807 |      |
| 1.00191.48 |     |      |     | C  |        |        |        |      |
| ATOM       | 547 | C    | LEU | 42 | 23.206 | 14.014 | 23.036 |      |
| 1.00166.66 |     |      |     | C  |        |        |        |      |
| ATOM       | 548 | O    | LEU | 42 | 23.054 | 12.938 | 23.614 |      |
| 1.00251.38 |     |      |     | O  |        |        |        |      |
| ATOM       | 549 | CB   | LEU | 42 | 21.838 | 15.840 | 24.040 |      |
| 1.00307.99 |     |      |     | C  |        |        |        |      |
| ATOM       | 550 | CG   | LEU | 42 | 20.586 | 16.710 | 23.873 |      |
| 1.00452.28 |     |      |     | C  |        |        |        |      |
| ATOM       | 551 | CD1  | LEU | 42 | 20.416 | 17.592 | 25.111 |      |
| 1.00681.24 |     |      |     | C  |        |        |        |      |
| ATOM       | 552 | CD2  | LEU | 42 | 20.720 | 17.593 | 22.620 |      |
| 1.00527.46 |     |      |     | C  |        |        |        |      |
| ATOM       | 553 | HN   | LEU | 42 | 20.424 | 13.642 | 23.273 |      |
| 1.00195.47 |     |      |     | H  |        |        |        |      |
| ATOM       | 554 | HA   | LEU | 42 | 22.250 | 15.584 | 21.956 |      |
| 1.00229.77 |     |      |     | H  |        |        |        |      |
| ATOM       | 555 | HB1  | LEU | 42 | 22.703 | 16.479 | 24.158 |      |
| 1.00342.49 |     |      |     | H  |        |        |        |      |
| ATOM       | 556 | HB2  | LEU | 42 | 21.729 | 15.218 | 24.915 |      |
| 1.00335.33 |     |      |     | H  |        |        |        |      |
| ATOM       | 557 | HG   | LEU | 42 | 19.721 | 16.069 | 23.771 |      |
| 1.00427.79 |     |      |     | H  |        |        |        |      |
| ATOM       | 558 | HD11 | LEU | 42 | 19.517 | 18.182 | 25.012 |      |
| 1.00909.71 |     |      |     | H  |        |        |        |      |
| ATOM       | 559 | HD12 | LEU | 42 | 21.269 | 18.248 | 25.207 |      |

|            |     |      |     |   |    |        |        |        |
|------------|-----|------|-----|---|----|--------|--------|--------|
| 1.00706.80 |     |      |     | H |    |        |        |        |
| ATOM       | 560 | HD13 | LEU |   | 42 | 20.342 | 16.969 | 25.991 |
| 1.00858.82 |     |      |     | H |    |        |        |        |
| ATOM       | 561 | HD21 | LEU |   | 42 | 21.742 | 17.930 | 22.518 |
| 1.00631.69 |     |      |     | H |    |        |        |        |
| ATOM       | 562 | HD22 | LEU |   | 42 | 20.068 | 18.449 | 22.708 |
| 1.00628.06 |     |      |     | H |    |        |        |        |
| ATOM       | 563 | HD23 | LEU |   | 42 | 20.442 | 17.021 | 21.746 |
| 1.00656.75 |     |      |     | H |    |        |        |        |
| ATOM       | 564 | N    | THR |   | 43 | 24.386 | 14.434 | 22.579 |
| 1.00178.52 |     |      |     | N |    |        |        |        |
| ATOM       | 565 | CA   | THR |   | 43 | 25.599 | 13.631 | 22.736 |
| 1.00240.84 |     |      |     | C |    |        |        |        |
| ATOM       | 566 | C    | THR |   | 43 | 26.815 | 14.527 | 22.959 |
| 1.00372.31 |     |      |     | C |    |        |        |        |
| ATOM       | 567 | O    | THR |   | 43 | 27.738 | 14.556 | 22.144 |
| 1.00500.13 |     |      |     | O |    |        |        |        |
| ATOM       | 568 | CB   | THR |   | 43 | 25.808 | 12.770 | 21.496 |
| 1.00354.13 |     |      |     | C |    |        |        |        |
| ATOM       | 569 | CG2  | THR |   | 43 | 25.682 | 13.625 | 20.233 |
| 1.00463.04 |     |      |     | C |    |        |        |        |
| ATOM       | 570 | OG1  | THR |   | 43 | 27.094 | 12.167 | 21.548 |
| 1.00508.50 |     |      |     | O |    |        |        |        |
| ATOM       | 571 | HN   | THR |   | 43 | 24.442 | 15.301 | 22.130 |
| 1.00229.59 |     |      |     | H |    |        |        |        |
| ATOM       | 572 | HA   | THR |   | 43 | 25.487 | 12.976 | 23.586 |
| 1.00249.90 |     |      |     | H |    |        |        |        |
| ATOM       | 573 | HB   | THR |   | 43 | 25.056 | 12.002 | 21.482 |
| 1.00481.58 |     |      |     | H |    |        |        |        |
| ATOM       | 574 | HG1  | THR |   | 43 | 27.044 | 11.412 | 22.138 |
| 1.00624.31 |     |      |     | H |    |        |        |        |
| ATOM       | 575 | HG21 | THR |   | 43 | 26.193 | 14.566 | 20.378 |
| 1.00650.95 |     |      |     | H |    |        |        |        |
| ATOM       | 576 | HG22 | THR |   | 43 | 24.639 | 13.813 | 20.028 |
| 1.00580.73 |     |      |     | H |    |        |        |        |
| ATOM       | 577 | HG23 | THR |   | 43 | 26.124 | 13.101 | 19.397 |
| 1.00571.99 |     |      |     | H |    |        |        |        |
| ATOM       | 578 | N    | PRO |   | 44 | 26.828 | 15.249 | 24.048 |
| 1.00488.39 |     |      |     | N |    |        |        |        |
| ATOM       | 579 | CA   | PRO |   | 44 | 27.950 | 16.167 | 24.400 |
| 1.00760.13 |     |      |     | C |    |        |        |        |
| ATOM       | 580 | C    | PRO |   | 44 | 29.177 | 15.393 | 24.875 |
| 1.00735.36 |     |      |     | C |    |        |        |        |
| ATOM       | 581 | O    | PRO |   | 44 | 30.277 | 15.937 | 24.956 |
| 1.00999.99 |     |      |     | O |    |        |        |        |
| ATOM       | 582 | CB   | PRO |   | 44 | 27.360 | 17.030 | 25.523 |
| 1.00999.99 |     |      |     | C |    |        |        |        |
| ATOM       | 583 | CG   | PRO |   | 44 | 26.351 | 16.148 | 26.183 |
| 1.00856.94 |     |      |     | C |    |        |        |        |
| ATOM       | 584 | CD   | PRO |   | 44 | 25.770 | 15.265 | 25.073 |
| 1.00548.09 |     |      |     | C |    |        |        |        |
| ATOM       | 585 | HA   | PRO |   | 44 | 28.203 | 16.788 | 23.556 |

|            |     |      |     |   |    |        |        |        |
|------------|-----|------|-----|---|----|--------|--------|--------|
| 1.00939.00 |     |      |     | H |    |        |        |        |
| ATOM       | 586 | HB1  | PRO | H | 44 | 26.875 | 17.902 | 25.110 |
| 1.00999.99 |     |      |     | H |    |        |        |        |
| ATOM       | 587 | HB2  | PRO | H | 44 | 28.132 | 17.323 | 26.224 |
| 1.00999.99 |     |      |     | H |    |        |        |        |
| ATOM       | 588 | HG1  | PRO | H | 44 | 25.567 | 16.740 | 26.630 |
| 1.00999.99 |     |      |     | H |    |        |        |        |
| ATOM       | 589 | HG2  | PRO | H | 44 | 26.832 | 15.536 | 26.939 |
| 1.00853.53 |     |      |     | H |    |        |        |        |
| ATOM       | 590 | HD1  | PRO | H | 44 | 24.867 | 15.698 | 24.670 |
| 1.00602.45 |     |      |     | H |    |        |        |        |
| ATOM       | 591 | HD2  | PRO | H | 44 | 25.584 | 14.264 | 25.441 |
| 1.00463.32 |     |      |     | H |    |        |        |        |
| ATOM       | 592 | N    | ILE | N | 45 | 28.971 | 14.119 | 25.191 |
| 1.00518.33 |     |      |     | N |    |        |        |        |
| ATOM       | 593 | CA   | ILE | N | 45 | 30.052 | 13.272 | 25.661 |
| 1.00582.79 |     |      |     | C |    |        |        |        |
| ATOM       | 594 | C    | ILE | C | 45 | 31.168 | 13.191 | 24.624 |
| 1.00795.93 |     |      |     | C |    |        |        |        |
| ATOM       | 595 | O    | ILE | C | 45 | 32.310 | 12.866 | 24.949 |
| 1.00898.75 |     |      |     | O |    |        |        |        |
| ATOM       | 596 | CB   | ILE | O | 45 | 29.506 | 11.877 | 25.958 |
| 1.00474.41 |     |      |     | C |    |        |        |        |
| ATOM       | 597 | CG1  | ILE | C | 45 | 28.816 | 11.313 | 24.709 |
| 1.00516.90 |     |      |     | C |    |        |        |        |
| ATOM       | 598 | CG2  | ILE | C | 45 | 28.495 | 11.961 | 27.101 |
| 1.00760.75 |     |      |     | C |    |        |        |        |
| ATOM       | 599 | CD1  | ILE | C | 45 | 28.472 | 9.838  | 24.934 |
| 1.00566.81 |     |      |     | C |    |        |        |        |
| ATOM       | 600 | HN   | ILE | C | 45 | 28.073 | 13.740 | 25.109 |
| 1.00395.72 |     |      |     | H |    |        |        |        |
| ATOM       | 601 | HA   | ILE | H | 45 | 30.448 | 13.690 | 26.573 |
| 1.00711.06 |     |      |     | H |    |        |        |        |
| ATOM       | 602 | HB   | ILE | H | 45 | 30.317 | 11.230 | 26.245 |
| 1.00477.81 |     |      |     | H |    |        |        |        |
| ATOM       | 603 | HG11 | ILE | H | 45 | 29.474 | 11.397 | 23.858 |
| 1.00624.28 |     |      |     | H |    |        |        |        |
| ATOM       | 604 | HG12 | ILE | H | 45 | 27.910 | 11.869 | 24.518 |
| 1.00744.84 |     |      |     | H |    |        |        |        |
| ATOM       | 605 | HG21 | ILE | H | 45 | 28.996 | 12.279 | 28.002 |
| 1.00920.57 |     |      |     | H |    |        |        |        |
| ATOM       | 606 | HG22 | ILE | H | 45 | 28.046 | 10.992 | 27.259 |
| 1.00999.99 |     |      |     | H |    |        |        |        |
| ATOM       | 607 | HG23 | ILE | H | 45 | 27.726 | 12.676 | 26.847 |
| 1.00865.46 |     |      |     | H |    |        |        |        |
| ATOM       | 608 | HD11 | ILE | H | 45 | 27.836 | 9.492  | 24.134 |
| 1.00658.89 |     |      |     | H |    |        |        |        |
| ATOM       | 609 | HD12 | ILE | H | 45 | 27.957 | 9.727  | 25.877 |
| 1.00734.30 |     |      |     | H |    |        |        |        |
| ATOM       | 610 | HD13 | ILE | H | 45 | 29.381 | 9.256  | 24.950 |
| 1.00675.84 |     |      |     | H |    |        |        |        |
| ATOM       | 611 | N    | ALA | H | 46 | 30.826 | 13.487 | 23.374 |



|            |     |     |     |   |    |        |        |        |
|------------|-----|-----|-----|---|----|--------|--------|--------|
| 1.00999.99 |     |     |     | N |    |        |        |        |
| ATOM       | 612 | CA  | ALA |   | 46 | 31.804 | 13.445 | 22.295 |
| 1.00999.99 |     |     |     | C |    |        |        |        |
| ATOM       | 613 | C   | ALA |   | 46 | 31.276 | 14.175 | 21.063 |
| 1.00999.99 |     |     |     | C |    |        |        |        |
| ATOM       | 614 | CB  | ALA |   | 46 | 32.120 | 11.992 | 21.932 |
| 1.00999.99 |     |     |     | C |    |        |        |        |
| ATOM       | 615 | OT1 | ALA |   | 46 | 31.639 | 15.325 | 20.881 |
| 1.00999.99 |     |     |     | O |    |        |        |        |
| ATOM       | 616 | OT2 | ALA |   | 46 | 30.516 | 13.574 | 20.323 |
| 1.00999.99 |     |     |     | O |    |        |        |        |
| ATOM       | 617 | HN  | ALA |   | 46 | 29.900 | 13.739 | 23.176 |
| 1.00999.99 |     |     |     | H |    |        |        |        |
| ATOM       | 618 | HA  | ALA |   | 46 | 32.713 | 13.926 | 22.625 |
| 1.00999.99 |     |     |     | H |    |        |        |        |
| ATOM       | 619 | HB1 | ALA |   | 46 | 31.197 | 11.441 | 21.819 |
| 1.00999.99 |     |     |     | H |    |        |        |        |
| ATOM       | 620 | HB2 | ALA |   | 46 | 32.713 | 11.546 | 22.715 |
| 1.00999.99 |     |     |     | H |    |        |        |        |
| ATOM       | 621 | HB3 | ALA |   | 46 | 32.670 | 11.965 | 21.003 |
| 1.00999.99 |     |     |     | H |    |        |        |        |
| ENDMDL     |     |     |     |   |    |        |        |        |
| TER        |     |     |     |   |    |        |        |        |
| MODEL      | 11  |     |     |   |    |        |        |        |
| ATOM       | 1   | N   | GLY |   | 1  | 27.745 | -2.434 | 17.602 |
| 1.00999.99 |     |     |     | N |    |        |        |        |
| ATOM       | 2   | CA  | GLY |   | 1  | 26.306 | -2.800 | 17.742 |
| 1.00999.99 |     |     |     | C |    |        |        |        |
| ATOM       | 3   | C   | GLY |   | 1  | 25.439 | -1.671 | 17.200 |
| 1.00999.99 |     |     |     | C |    |        |        |        |
| ATOM       | 4   | O   | GLY |   | 1  | 24.973 | -0.818 | 17.957 |
| 1.00999.99 |     |     |     | O |    |        |        |        |
| ATOM       | 5   | HA1 | GLY |   | 1  | 26.076 | -2.961 | 18.783 |
| 1.00999.99 |     |     |     | H |    |        |        |        |
| ATOM       | 6   | HA2 | GLY |   | 1  | 26.111 | -3.705 | 17.184 |
| 1.00999.99 |     |     |     | H |    |        |        |        |
| ATOM       | 7   | HT1 | GLY |   | 1  | 28.177 | -2.356 | 18.543 |
| 1.00999.99 |     |     |     | H |    |        |        |        |
| ATOM       | 8   | HT2 | GLY |   | 1  | 27.823 | -1.521 | 17.107 |
| 1.00999.99 |     |     |     | H |    |        |        |        |
| ATOM       | 9   | HT3 | GLY |   | 1  | 28.239 | -3.169 | 17.057 |
| 1.00999.99 |     |     |     | H |    |        |        |        |
| ATOM       | 10  | N   | LEU |   | 2  | 25.222 | -1.672 | 15.890 |
| 1.00999.99 |     |     |     | N |    |        |        |        |
| ATOM       | 11  | CA  | LEU |   | 2  | 24.406 | -0.640 | 15.260 |
| 1.00895.59 |     |     |     | C |    |        |        |        |
| ATOM       | 12  | C   | LEU |   | 2  | 22.928 | -0.886 | 15.544 |
| 1.00532.27 |     |     |     | C |    |        |        |        |
| ATOM       | 13  | O   | LEU |   | 2  | 22.490 | -2.030 | 15.657 |
| 1.00625.21 |     |     |     | O |    |        |        |        |
| ATOM       | 14  | CB  | LEU |   | 2  | 24.641 | -0.639 | 13.747 |
| 1.00999.99 |     |     |     | C |    |        |        |        |

|            |    |      |     |   |        |        |        |      |
|------------|----|------|-----|---|--------|--------|--------|------|
| ATOM       | 15 | CG   | LEU | 2 | 26.127 | -0.405 | 13.445 |      |
| 1.00999.99 |    |      |     |   |        |        |        | C    |
| ATOM       | 16 | CD1  | LEU | 2 | 26.350 | -0.489 | 11.931 |      |
| 1.00999.99 |    |      |     |   |        |        |        | C    |
| ATOM       | 17 | CD2  | LEU | 2 | 26.562 | 0.981  | 13.956 |      |
| 1.00999.99 |    |      |     |   |        |        |        | C    |
| ATOM       | 18 | HN   | LEU | 2 | 25.619 | -2.378 | 15.337 |      |
| 1.00999.99 |    |      |     |   |        |        |        | H    |
| ATOM       | 19 | HA   | LEU | 2 | 24.683 | 0.321  | 15.660 |      |
| 1.00890.87 |    |      |     |   |        |        |        | H    |
| ATOM       | 20 | HB1  | LEU | 2 | 24.058 | 0.151  | 13.295 |      |
| 1.00924.07 |    |      |     |   |        |        |        | H    |
| ATOM       | 21 | HB2  | LEU | 2 | 24.336 | -1.590 | 13.335 |      |
| 1.00999.99 |    |      |     |   |        |        |        | H    |
| ATOM       | 22 | HG   | LEU | 2 | 26.713 | -1.171 | 13.934 |      |
| 1.00999.99 |    |      |     |   |        |        |        | H    |
| ATOM       | 23 | HD11 | LEU | 2 | 25.900 | -1.395 | 11.552 |      |
| 1.00999.99 |    |      |     |   |        |        |        | H    |
| ATOM       | 24 | HD12 | LEU | 2 | 27.410 | -0.499 | 11.724 |      |
| 1.00999.99 |    |      |     |   |        |        |        | H    |
| ATOM       | 25 | HD13 | LEU | 2 | 25.897 | 0.366  | 11.453 |      |
| 1.00999.99 |    |      |     |   |        |        |        | H    |
| ATOM       | 26 | HD21 | LEU | 2 | 25.753 | 1.688  | 13.829 |      |
| 1.00999.99 |    |      |     |   |        |        |        | H    |
| ATOM       | 27 | HD22 | LEU | 2 | 27.424 | 1.321  | 13.400 |      |
| 1.00999.99 |    |      |     |   |        |        |        | H    |
| ATOM       | 28 | HD23 | LEU | 2 | 26.819 | 0.913  | 15.002 |      |
| 1.00999.99 |    |      |     |   |        |        |        | H    |
| ATOM       | 29 | N    | CYS | 3 | 22.164 | 0.196  | 15.665 |      |
| 1.00271.28 |    |      |     |   |        |        |        | N    |
| ATOM       | 30 | CA   | CYS | 3 | 20.737 | 0.082  | 15.942 |      |
| 1.00104.50 |    |      |     |   |        |        |        | C    |
| ATOM       | 31 | C    | CYS | 3 | 20.025 | -0.661 | 14.817 | 1.00 |
| 90.98      |    |      | C   |   |        |        |        |      |
| ATOM       | 32 | O    | CYS | 3 | 19.166 | -1.506 | 15.064 |      |
| 1.00207.28 |    |      |     |   |        |        |        | O    |
| ATOM       | 33 | CB   | CYS | 3 | 20.116 | 1.472  | 16.099 | 1.00 |
| 37.83      |    |      | C   |   |        |        |        |      |
| ATOM       | 34 | SG   | CYS | 3 | 20.690 | 2.229  | 17.640 | 1.00 |
| 81.56      |    |      | S   |   |        |        |        |      |
| ATOM       | 35 | HN   | CYS | 3 | 22.566 | 1.084  | 15.569 |      |
| 1.00296.55 |    |      |     |   |        |        |        | H    |
| ATOM       | 36 | HA   | CYS | 3 | 20.603 | -0.463 | 16.859 |      |
| 1.00166.45 |    |      |     |   |        |        |        | H    |
| ATOM       | 37 | HB1  | CYS | 3 | 19.040 | 1.385  | 16.120 | 1.00 |
| 40.38      |    |      | H   |   |        |        |        |      |
| ATOM       | 38 | HB2  | CYS | 3 | 20.410 | 2.092  | 15.264 | 1.00 |
| 98.45      |    |      | H   |   |        |        |        |      |
| ATOM       | 39 | N    | SER | 4 | 20.385 | -0.335 | 13.584 | 1.00 |
| 85.31      |    |      | N   |   |        |        |        |      |
| ATOM       | 40 | CA   | SER | 4 | 19.765 | -0.971 | 12.424 | 1.00 |
| 92.94      |    |      | C   |   |        |        |        |      |

|            |    |     |     |   |        |        |        |      |
|------------|----|-----|-----|---|--------|--------|--------|------|
| ATOM       | 41 | C   | SER | 4 | 18.351 | -0.432 | 12.221 | 1.00 |
| 67.37      |    |     | C   |   |        |        |        |      |
| ATOM       | 42 | O   | SER | 4 | 17.891 | -0.266 | 11.092 |      |
| 1.00102.28 |    |     | O   |   |        |        |        |      |
| ATOM       | 43 | CB  | SER | 4 | 19.716 | -2.493 | 12.621 |      |
| 1.00123.83 |    |     | C   |   |        |        |        |      |
| ATOM       | 44 | OG  | SER | 4 | 19.793 | -3.130 | 11.352 |      |
| 1.00178.89 |    |     | O   |   |        |        |        |      |
| ATOM       | 45 | HN  | SER | 4 | 21.072 | 0.348  | 13.450 |      |
| 1.00163.03 |    |     | H   |   |        |        |        |      |
| ATOM       | 46 | HA  | SER | 4 | 20.355 | -0.751 | 11.546 |      |
| 1.00129.78 |    |     | H   |   |        |        |        |      |
| ATOM       | 47 | HB1 | SER | 4 | 18.789 | -2.769 | 13.119 |      |
| 1.00105.26 |    |     | H   |   |        |        |        |      |
| ATOM       | 48 | HB2 | SER | 4 | 20.551 | -2.806 | 13.225 |      |
| 1.00156.87 |    |     | H   |   |        |        |        |      |
| ATOM       | 49 | HG  | SER | 4 | 20.567 | -2.790 | 10.896 |      |
| 1.00218.16 |    |     | H   |   |        |        |        |      |
| ATOM       | 50 | N   | GLU | 5 | 17.669 | -0.171 | 13.332 | 1.00 |
| 41.67      |    |     | N   |   |        |        |        |      |
| ATOM       | 51 | CA  | GLU | 5 | 16.305 | 0.339  | 13.295 | 1.00 |
| 41.21      |    |     | C   |   |        |        |        |      |
| ATOM       | 52 | C   | GLU | 5 | 16.026 | 1.204  | 14.521 | 1.00 |
| 41.92      |    |     | C   |   |        |        |        |      |
| ATOM       | 53 | O   | GLU | 5 | 16.747 | 1.132  | 15.517 | 1.00 |
| 74.72      |    |     | O   |   |        |        |        |      |
| ATOM       | 54 | CB  | GLU | 5 | 15.323 | -0.830 | 13.244 | 1.00 |
| 49.24      |    |     | C   |   |        |        |        |      |
| ATOM       | 55 | CG  | GLU | 5 | 15.543 | -1.712 | 14.465 | 1.00 |
| 55.48      |    |     | C   |   |        |        |        |      |
| ATOM       | 56 | CD  | GLU | 5 | 14.762 | -3.013 | 14.319 | 1.00 |
| 92.06      |    |     | C   |   |        |        |        |      |
| ATOM       | 57 | OE1 | GLU | 5 | 14.844 | -3.835 | 15.217 |      |
| 1.00206.49 |    |     | O   |   |        |        |        |      |
| ATOM       | 58 | OE2 | GLU | 5 | 14.092 | -3.171 | 13.310 |      |
| 1.00197.24 |    |     | O1- |   |        |        |        |      |
| ATOM       | 59 | HN  | GLU | 5 | 18.093 | -0.333 | 14.202 | 1.00 |
| 45.52      |    |     | H   |   |        |        |        |      |
| ATOM       | 60 | HA  | GLU | 5 | 16.176 | 0.934  | 12.412 | 1.00 |
| 60.63      |    |     | H   |   |        |        |        |      |
| ATOM       | 61 | HB1 | GLU | 5 | 15.494 | -1.407 | 12.349 | 1.00 |
| 61.59      |    |     | H   |   |        |        |        |      |
| ATOM       | 62 | HB2 | GLU | 5 | 14.314 | -0.454 | 13.245 | 1.00 |
| 63.66      |    |     | H   |   |        |        |        |      |
| ATOM       | 63 | HG1 | GLU | 5 | 15.208 | -1.191 | 15.348 | 1.00 |
| 58.03      |    |     | H   |   |        |        |        |      |
| ATOM       | 64 | HG2 | GLU | 5 | 16.594 | -1.928 | 14.552 | 1.00 |
| 57.77      |    |     | H   |   |        |        |        |      |
| ATOM       | 65 | N   | ASN | 6 | 14.987 | 2.027  | 14.440 | 1.00 |
| 50.73      |    |     | N   |   |        |        |        |      |
| ATOM       | 66 | CA  | ASN | 6 | 14.635 | 2.910  | 15.549 | 1.00 |
| 71.04      |    |     | C   |   |        |        |        |      |

|            |    |      |     |   |        |        |        |      |
|------------|----|------|-----|---|--------|--------|--------|------|
| ATOM       | 67 | C    | ASN | 6 | 14.285 | 2.109  | 16.800 | 1.00 |
| 65.17      |    |      | C   |   |        |        |        |      |
| ATOM       | 68 | O    | ASN | 6 | 14.663 | 2.482  | 17.911 | 1.00 |
| 94.86      |    |      | O   |   |        |        |        |      |
| ATOM       | 69 | CB   | ASN | 6 | 13.446 | 3.788  | 15.156 | 1.00 |
| 94.83      |    |      | C   |   |        |        |        |      |
| ATOM       | 70 | CG   | ASN | 6 | 13.872 | 4.806  | 14.105 |      |
| 1.00160.94 |    |      | C   |   |        |        |        |      |
| ATOM       | 71 | ND2  | ASN | 6 | 14.801 | 5.676  | 14.392 |      |
| 1.00244.88 |    |      | N   |   |        |        |        |      |
| ATOM       | 72 | OD1  | ASN | 6 | 13.346 | 4.807  | 12.992 |      |
| 1.00219.73 |    |      | O   |   |        |        |        |      |
| ATOM       | 73 | HN   | ASN | 6 | 14.452 | 2.049  | 13.620 | 1.00 |
| 72.81      |    |      | H   |   |        |        |        |      |
| ATOM       | 74 | HA   | ASN | 6 | 15.478 | 3.548  | 15.768 | 1.00 |
| 96.02      |    |      | H   |   |        |        |        |      |
| ATOM       | 75 | HB1  | ASN | 6 | 13.081 | 4.308  | 16.030 |      |
| 1.00111.09 |    |      | H   |   |        |        |        |      |
| ATOM       | 76 | HB2  | ASN | 6 | 12.659 | 3.165  | 14.755 | 1.00 |
| 98.13      |    |      | H   |   |        |        |        |      |
| ATOM       | 77 | HD21 | ASN | 6 | 15.218 | 5.673  | 15.278 |      |
| 1.00272.43 |    |      | H   |   |        |        |        |      |
| ATOM       | 78 | HD22 | ASN | 6 | 15.081 | 6.334  | 13.721 |      |
| 1.00336.78 |    |      | H   |   |        |        |        |      |
| ATOM       | 79 | N    | GLY | 7 | 13.559 | 1.008  | 16.615 | 1.00 |
| 51.80      |    |      | N   |   |        |        |        |      |
| ATOM       | 80 | CA   | GLY | 7 | 13.157 | 0.156  | 17.738 | 1.00 |
| 71.47      |    |      | C   |   |        |        |        |      |
| ATOM       | 81 | C    | GLY | 7 | 14.029 | -1.089 | 17.816 | 1.00 |
| 41.04      |    |      | C   |   |        |        |        |      |
| ATOM       | 82 | O    | GLY | 7 | 13.527 | -2.206 | 17.945 | 1.00 |
| 44.54      |    |      | O   |   |        |        |        |      |
| ATOM       | 83 | HN   | GLY | 7 | 13.287 | 0.763  | 15.706 | 1.00 |
| 45.49      |    |      | H   |   |        |        |        |      |
| ATOM       | 84 | HA1  | GLY | 7 | 12.134 | -0.145 | 17.598 |      |
| 1.00103.52 |    |      | H   |   |        |        |        |      |
| ATOM       | 85 | HA2  | GLY | 7 | 13.239 | 0.708  | 18.665 |      |
| 1.00108.67 |    |      | H   |   |        |        |        |      |
| ATOM       | 86 | N    | ASP | 8 | 15.335 | -0.890 | 17.731 | 1.00 |
| 27.00      |    |      | N   |   |        |        |        |      |
| ATOM       | 87 | CA   | ASP | 8 | 16.272 | -2.007 | 17.784 | 1.00 |
| 14.15      |    |      | C   |   |        |        |        |      |
| ATOM       | 88 | C    | ASP | 8 | 16.156 | -2.743 | 19.114 | 1.00 |
| 9.37       |    |      | C   |   |        |        |        |      |
| ATOM       | 89 | O    | ASP | 8 | 16.025 | -3.966 | 19.150 | 1.00 |
| 14.61      |    |      | O   |   |        |        |        |      |
| ATOM       | 90 | CB   | ASP | 8 | 17.703 | -1.499 | 17.612 | 1.00 |
| 15.06      |    |      | C   |   |        |        |        |      |
| ATOM       | 91 | CG   | ASP | 8 | 18.646 | -2.672 | 17.361 | 1.00 |
| 21.22      |    |      | C   |   |        |        |        |      |
| ATOM       | 92 | OD1  | ASP | 8 | 18.177 | -3.691 | 16.882 |      |
| 1.00119.56 |    |      | O   |   |        |        |        |      |

|            |     |     |     |    |        |        |        |      |
|------------|-----|-----|-----|----|--------|--------|--------|------|
| ATOM       | 93  | OD2 | ASP | 8  | 19.821 | -2.534 | 17.655 |      |
| 1.00133.27 |     |     |     |    |        |        |        | O1-  |
| ATOM       | 94  | HN  | ASP | 8  | 15.675 | 0.021  | 17.623 | 1.00 |
| 35.63      |     |     | H   |    |        |        |        |      |
| ATOM       | 95  | HA  | ASP | 8  | 16.046 | -2.691 | 16.988 | 1.00 |
| 20.92      |     |     | H   |    |        |        |        |      |
| ATOM       | 96  | HB1 | ASP | 8  | 18.009 | -0.983 | 18.509 | 1.00 |
| 29.39      |     |     | H   |    |        |        |        |      |
| ATOM       | 97  | HB2 | ASP | 8  | 17.741 | -0.816 | 16.776 | 1.00 |
| 44.14      |     |     | H   |    |        |        |        |      |
| ATOM       | 98  | N   | CYS | 9  | 16.202 | -1.987 | 20.199 | 1.00 |
| 5.93       |     |     | N   |    |        |        |        |      |
| ATOM       | 99  | CA  | CYS | 9  | 16.095 | -2.575 | 21.528 | 1.00 |
| 7.54       |     |     | C   |    |        |        |        |      |
| ATOM       | 100 | C   | CYS | 9  | 14.723 | -3.205 | 21.715 | 1.00 |
| 14.60      |     |     | C   |    |        |        |        |      |
| ATOM       | 101 | O   | CYS | 9  | 14.591 | -4.296 | 22.272 | 1.00 |
| 25.78      |     |     | O   |    |        |        |        |      |
| ATOM       | 102 | CB  | CYS | 9  | 16.318 | -1.508 | 22.590 | 1.00 |
| 6.63       |     |     | C   |    |        |        |        |      |
| ATOM       | 103 | SG  | CYS | 9  | 18.048 | -1.016 | 22.554 | 1.00 |
| 10.91      |     |     | S   |    |        |        |        |      |
| ATOM       | 104 | HN  | CYS | 9  | 16.304 | -1.018 | 20.105 | 1.00 |
| 6.51       |     |     | H   |    |        |        |        |      |
| ATOM       | 105 | HA  | CYS | 9  | 16.859 | -3.327 | 21.639 | 1.00 |
| 11.12      |     |     | H   |    |        |        |        |      |
| ATOM       | 106 | HB1 | CYS | 9  | 16.080 | -1.907 | 23.561 | 1.00 |
| 11.28      |     |     | H   |    |        |        |        |      |
| ATOM       | 107 | HB2 | CYS | 9  | 15.695 | -0.650 | 22.385 | 1.00 |
| 5.04       |     |     | H   |    |        |        |        |      |
| ATOM       | 108 | N   | ALA | 10 | 13.706 | -2.502 | 21.234 | 1.00 |
| 16.26      |     |     | N   |    |        |        |        |      |
| ATOM       | 109 | CA  | ALA | 10 | 12.329 | -2.975 | 21.330 | 1.00 |
| 32.04      |     |     | C   |    |        |        |        |      |
| ATOM       | 110 | C   | ALA | 10 | 11.408 | -2.056 | 20.531 | 1.00 |
| 45.47      |     |     | C   |    |        |        |        |      |
| ATOM       | 111 | O   | ALA | 10 | 11.818 | -0.979 | 20.098 |      |
| 1.00119.04 |     |     |     |    |        |        |        | O    |
| ATOM       | 112 | CB  | ALA | 10 | 11.886 | -3.020 | 22.796 | 1.00 |
| 30.10      |     |     | C   |    |        |        |        |      |
| ATOM       | 113 | HN  | ALA | 10 | 13.885 | -1.644 | 20.799 | 1.00 |
| 12.81      |     |     | H   |    |        |        |        |      |
| ATOM       | 114 | HA  | ALA | 10 | 12.272 | -3.972 | 20.917 | 1.00 |
| 47.14      |     |     | H   |    |        |        |        |      |
| ATOM       | 115 | HB1 | ALA | 10 | 11.589 | -2.032 | 23.115 | 1.00 |
| 84.37      |     |     | H   |    |        |        |        |      |
| ATOM       | 116 | HB2 | ALA | 10 | 12.705 | -3.363 | 23.409 |      |
| 1.00118.20 |     |     |     |    |        |        |        | H    |
| ATOM       | 117 | HB3 | ALA | 10 | 11.052 | -3.697 | 22.898 |      |
| 1.00117.32 |     |     |     |    |        |        |        | H    |
| ATOM       | 118 | N   | ALA | 11 | 10.167 | -2.486 | 20.334 | 1.00 |
| 30.62      |     |     | N   |    |        |        |        |      |

|            |     |     |     |     |        |        |        |      |
|------------|-----|-----|-----|-----|--------|--------|--------|------|
| ATOM       | 119 | CA  | ALA | 11  | 9.207  | -1.685 | 19.580 | 1.00 |
| 35.24      |     |     | C   |     |        |        |        |      |
| ATOM       | 120 | C   | ALA | 11  | 8.967  | -0.339 | 20.259 | 1.00 |
| 22.78      |     |     | C   |     |        |        |        |      |
| ATOM       | 121 | O   | ALA | 11  | 8.877  | 0.693  | 19.594 | 1.00 |
| 53.33      |     |     | O   |     |        |        |        |      |
| ATOM       | 122 | CB  | ALA | 11  | 7.883  | -2.440 | 19.457 | 1.00 |
| 60.49      |     |     | C   |     |        |        |        |      |
| ATOM       | 123 | HN  | ALA | 11  | 9.893  | -3.353 | 20.697 | 1.00 |
| 50.37      |     |     | H   |     |        |        |        |      |
| ATOM       | 124 | HA  | ALA | 11  | 9.601  | -1.511 | 18.589 | 1.00 |
| 41.70      |     |     | H   |     |        |        |        |      |
| ATOM       | 125 | HB1 | ALA | 11  | 7.248  | -1.936 | 18.743 |      |
| 1.00157.06 |     |     |     | H   |        |        |        |      |
| ATOM       | 126 | HB2 | ALA | 11  | 7.395  | -2.468 | 20.419 |      |
| 1.00148.83 |     |     |     | H   |        |        |        |      |
| ATOM       | 127 | HB3 | ALA | 11  | 8.075  | -3.449 | 19.119 |      |
| 1.00137.06 |     |     |     | H   |        |        |        |      |
| ATOM       | 128 | N   | ASP | 12  | 8.854  | -0.355 | 21.585 | 1.00 |
| 18.98      |     |     | N   |     |        |        |        |      |
| ATOM       | 129 | CA  | ASP | 12  | 8.613  | 0.872  | 22.343 | 1.00 |
| 31.05      |     |     | C   |     |        |        |        |      |
| ATOM       | 130 | C   | ASP | 12  | 9.922  | 1.604  | 22.636 | 1.00 |
| 22.98      |     |     | C   |     |        |        |        |      |
| ATOM       | 131 | O   | ASP | 12  | 9.949  | 2.831  | 22.728 | 1.00 |
| 37.14      |     |     | O   |     |        |        |        |      |
| ATOM       | 132 | CB  | ASP | 12  | 7.912  | 0.538  | 23.662 | 1.00 |
| 48.35      |     |     | C   |     |        |        |        |      |
| ATOM       | 133 | CG  | ASP | 12  | 6.493  | 0.054  | 23.388 |      |
| 1.00104.83 |     |     |     | C   |        |        |        |      |
| ATOM       | 134 | OD1 | ASP | 12  | 6.021  | 0.258  | 22.283 |      |
| 1.00258.73 |     |     |     | O   |        |        |        |      |
| ATOM       | 135 | OD2 | ASP | 12  | 5.898  | -0.514 | 24.291 |      |
| 1.00213.46 |     |     |     | O1- |        |        |        |      |
| ATOM       | 136 | HN  | ASP | 12  | 8.929  | -1.208 | 22.063 | 1.00 |
| 36.19      |     |     | H   |     |        |        |        |      |
| ATOM       | 137 | HA  | ASP | 12  | 7.971  | 1.523  | 21.767 | 1.00 |
| 49.76      |     |     | H   |     |        |        |        |      |
| ATOM       | 138 | HB1 | ASP | 12  | 7.877  | 1.421  | 24.283 | 1.00 |
| 95.71      |     |     | H   |     |        |        |        |      |
| ATOM       | 139 | HB2 | ASP | 12  | 8.464  | -0.237 | 24.173 | 1.00 |
| 54.37      |     |     | H   |     |        |        |        |      |
| ATOM       | 140 | N   | GLU | 13  | 11.001 | 0.844  | 22.789 | 1.00 |
| 17.60      |     |     | N   |     |        |        |        |      |
| ATOM       | 141 | CA  | GLU | 13  | 12.306 | 1.431  | 23.081 | 1.00 |
| 12.01      |     |     | C   |     |        |        |        |      |
| ATOM       | 142 | C   | GLU | 13  | 12.901 | 2.087  | 21.839 | 1.00 |
| 10.07      |     |     | C   |     |        |        |        |      |
| ATOM       | 143 | O   | GLU | 13  | 12.553 | 1.736  | 20.711 | 1.00 |
| 12.81      |     |     | O   |     |        |        |        |      |
| ATOM       | 144 | CB  | GLU | 13  | 13.249 | 0.349  | 23.607 | 1.00 |
| 11.74      |     |     | C   |     |        |        |        |      |

|            |     |     |     |    |        |        |        |      |
|------------|-----|-----|-----|----|--------|--------|--------|------|
| ATOM       | 145 | CG  | GLU | 13 | 12.710 | -0.184 | 24.937 | 1.00 |
| 13.49      |     |     | C   |    |        |        |        |      |
| ATOM       | 146 | CD  | GLU | 13 | 13.502 | -1.414 | 25.370 |      |
| 1.00142.36 |     |     | C   |    |        |        |        |      |
| ATOM       | 147 | OE1 | GLU | 13 | 12.878 | -2.410 | 25.697 |      |
| 1.00339.06 |     |     | O   |    |        |        |        |      |
| ATOM       | 148 | OE2 | GLU | 13 | 14.718 | -1.341 | 25.371 |      |
| 1.00335.28 |     |     | O1- |    |        |        |        |      |
| ATOM       | 149 | HN  | GLU | 13 | 10.918 | -0.129 | 22.711 | 1.00 |
| 28.36      |     |     | H   |    |        |        |        |      |
| ATOM       | 150 | HA  | GLU | 13 | 12.184 | 2.184  | 23.847 | 1.00 |
| 13.06      |     |     | H   |    |        |        |        |      |
| ATOM       | 151 | HB1 | GLU | 13 | 14.231 | 0.770  | 23.761 | 1.00 |
| 13.76      |     |     | H   |    |        |        |        |      |
| ATOM       | 152 | HB2 | GLU | 13 | 13.309 | -0.457 | 22.890 | 1.00 |
| 9.94       |     |     | H   |    |        |        |        |      |
| ATOM       | 153 | HG1 | GLU | 13 | 11.670 | -0.449 | 24.823 | 1.00 |
| 66.02      |     |     | H   |    |        |        |        |      |
| ATOM       | 154 | HG2 | GLU | 13 | 12.803 | 0.584  | 25.691 | 1.00 |
| 56.23      |     |     | H   |    |        |        |        |      |
| ATOM       | 155 | N   | CYS | 14 | 13.803 | 3.047  | 22.056 | 1.00 |
| 9.12       |     |     | N   |    |        |        |        |      |
| ATOM       | 156 | CA  | CYS | 14 | 14.452 | 3.766  | 20.954 | 1.00 |
| 10.69      |     |     | C   |    |        |        |        |      |
| ATOM       | 157 | C   | CYS | 14 | 15.937 | 3.432  | 20.900 | 1.00 |
| 9.56       |     |     | C   |    |        |        |        |      |
| ATOM       | 158 | O   | CYS | 14 | 16.578 | 3.251  | 21.933 | 1.00 |
| 13.62      |     |     | O   |    |        |        |        |      |
| ATOM       | 159 | CB  | CYS | 14 | 14.286 | 5.275  | 21.147 | 1.00 |
| 13.96      |     |     | C   |    |        |        |        |      |
| ATOM       | 160 | SG  | CYS | 14 | 15.138 | 6.148  | 19.807 | 1.00 |
| 42.96      |     |     | S   |    |        |        |        |      |
| ATOM       | 161 | HN  | CYS | 14 | 14.039 | 3.281  | 22.979 | 1.00 |
| 9.76       |     |     | H   |    |        |        |        |      |
| ATOM       | 162 | HA  | CYS | 14 | 13.997 | 3.483  | 20.015 | 1.00 |
| 15.54      |     |     | H   |    |        |        |        |      |
| ATOM       | 163 | HB1 | CYS | 14 | 14.712 | 5.564  | 22.094 | 1.00 |
| 50.72      |     |     | H   |    |        |        |        |      |
| ATOM       | 164 | HB2 | CYS | 14 | 13.237 | 5.527  | 21.131 | 1.00 |
| 46.13      |     |     | H   |    |        |        |        |      |
| ATOM       | 165 | N   | CYS | 15 | 16.480 | 3.360  | 19.686 | 1.00 |
| 9.60       |     |     | N   |    |        |        |        |      |
| ATOM       | 166 | CA  | CYS | 15 | 17.897 | 3.056  | 19.491 | 1.00 |
| 9.28       |     |     | C   |    |        |        |        |      |
| ATOM       | 167 | C   | CYS | 15 | 18.456 | 3.985  | 18.426 | 1.00 |
| 9.92       |     |     | C   |    |        |        |        |      |
| ATOM       | 168 | O   | CYS | 15 | 17.898 | 4.094  | 17.334 | 1.00 |
| 13.31      |     |     | O   |    |        |        |        |      |
| ATOM       | 169 | CB  | CYS | 15 | 18.064 | 1.601  | 19.045 | 1.00 |
| 12.90      |     |     | C   |    |        |        |        |      |
| ATOM       | 170 | SG  | CYS | 15 | 19.816 | 1.136  | 19.097 | 1.00 |
| 39.11      |     |     | S   |    |        |        |        |      |

|            |     |      |     |    |        |       |        |      |
|------------|-----|------|-----|----|--------|-------|--------|------|
| ATOM       | 171 | HN   | CYS | 15 | 15.917 | 3.526 | 18.900 | 1.00 |
| 13.12      |     | H    |     |    |        |       |        |      |
| ATOM       | 172 | HA   | CYS | 15 | 18.437 | 3.209 | 20.415 | 1.00 |
| 8.26       |     | H    |     |    |        |       |        |      |
| ATOM       | 173 | HB1  | CYS | 15 | 17.692 | 1.488 | 18.037 | 1.00 |
| 24.82      |     | H    |     |    |        |       |        |      |
| ATOM       | 174 | HB2  | CYS | 15 | 17.503 | 0.958 | 19.708 | 1.00 |
| 27.31      |     | H    |     |    |        |       |        |      |
| ATOM       | 175 | N    | VAL | 16 | 19.548 | 4.673 | 18.747 | 1.00 |
| 9.56       |     | N    |     |    |        |       |        |      |
| ATOM       | 176 | CA   | VAL | 16 | 20.152 | 5.609 | 17.802 | 1.00 |
| 11.99      |     | C    |     |    |        |       |        |      |
| ATOM       | 177 | C    | VAL | 16 | 21.671 | 5.480 | 17.807 | 1.00 |
| 7.73       |     | C    |     |    |        |       |        |      |
| ATOM       | 178 | O    | VAL | 16 | 22.305 | 5.486 | 18.862 | 1.00 |
| 8.83       |     | O    |     |    |        |       |        |      |
| ATOM       | 179 | CB   | VAL | 16 | 19.742 | 7.035 | 18.176 | 1.00 |
| 18.37      |     | C    |     |    |        |       |        |      |
| ATOM       | 180 | CG1  | VAL | 16 | 20.444 | 7.461 | 19.468 | 1.00 |
| 39.61      |     | C    |     |    |        |       |        |      |
| ATOM       | 181 | CG2  | VAL | 16 | 20.119 | 7.985 | 17.042 |      |
| 1.00115.21 |     |      | C   |    |        |       |        |      |
| ATOM       | 182 | HN   | VAL | 16 | 19.947 | 4.560 | 19.637 | 1.00 |
| 9.76       |     | H    |     |    |        |       |        |      |
| ATOM       | 183 | HA   | VAL | 16 | 19.793 | 5.398 | 16.803 | 1.00 |
| 17.27      |     | H    |     |    |        |       |        |      |
| ATOM       | 184 | HB   | VAL | 16 | 18.671 | 7.067 | 18.328 | 1.00 |
| 52.63      |     | H    |     |    |        |       |        |      |
| ATOM       | 185 | HG11 | VAL | 16 | 21.485 | 7.661 | 19.263 |      |
| 1.00128.07 |     |      | H   |    |        |       |        |      |
| ATOM       | 186 | HG12 | VAL | 16 | 20.367 | 6.669 | 20.199 |      |
| 1.00154.13 |     |      | H   |    |        |       |        |      |
| ATOM       | 187 | HG13 | VAL | 16 | 19.976 | 8.354 | 19.855 |      |
| 1.00135.74 |     |      | H   |    |        |       |        |      |
| ATOM       | 188 | HG21 | VAL | 16 | 19.471 | 7.807 | 16.196 |      |
| 1.00229.05 |     |      | H   |    |        |       |        |      |
| ATOM       | 189 | HG22 | VAL | 16 | 21.144 | 7.812 | 16.753 |      |
| 1.00261.82 |     |      | H   |    |        |       |        |      |
| ATOM       | 190 | HG23 | VAL | 16 | 20.005 | 9.005 | 17.374 |      |
| 1.00210.07 |     |      | H   |    |        |       |        |      |
| ATOM       | 191 | N    | ASP | 17 | 22.247 | 5.357 | 16.612 | 1.00 |
| 14.34      |     | N    |     |    |        |       |        |      |
| ATOM       | 192 | CA   | ASP | 17 | 23.694 | 5.220 | 16.470 | 1.00 |
| 11.90      |     | C    |     |    |        |       |        |      |
| ATOM       | 193 | C    | ASP | 17 | 24.350 | 6.579 | 16.248 | 1.00 |
| 13.15      |     | C    |     |    |        |       |        |      |
| ATOM       | 194 | O    | ASP | 17 | 23.847 | 7.408 | 15.491 | 1.00 |
| 25.96      |     | O    |     |    |        |       |        |      |
| ATOM       | 195 | CB   | ASP | 17 | 24.013 | 4.316 | 15.277 | 1.00 |
| 20.80      |     | C    |     |    |        |       |        |      |
| ATOM       | 196 | CG   | ASP | 17 | 23.611 | 2.879 | 15.583 | 1.00 |
| 28.72      |     | C    |     |    |        |       |        |      |



|      |            |      |     |    |        |        |        |      |
|------|------------|------|-----|----|--------|--------|--------|------|
| ATOM | 197        | OD1  | ASP | 17 | 23.392 | 2.579  | 16.746 |      |
|      | 1.00135.42 |      |     |    |        |        |        | O    |
| ATOM | 198        | OD2  | ASP | 17 | 23.524 | 2.099  | 14.649 |      |
|      | 1.00114.17 |      |     |    |        |        |        | O1-  |
| ATOM | 199        | HN   | ASP | 17 | 21.684 | 5.353  | 15.810 | 1.00 |
|      | 28.29      |      | H   |    |        |        |        |      |
| ATOM | 200        | HA   | ASP | 17 | 24.105 | 4.772  | 17.364 | 1.00 |
|      | 10.49      |      | H   |    |        |        |        |      |
| ATOM | 201        | HB1  | ASP | 17 | 25.075 | 4.354  | 15.074 | 1.00 |
|      | 22.42      |      | H   |    |        |        |        |      |
| ATOM | 202        | HB2  | ASP | 17 | 23.470 | 4.662  | 14.410 | 1.00 |
|      | 29.52      |      | H   |    |        |        |        |      |
| ATOM | 203        | N    | THR | 18 | 25.490 | 6.788  | 16.903 | 1.00 |
|      | 11.55      |      | N   |    |        |        |        |      |
| ATOM | 204        | CA   | THR | 18 | 26.244 | 8.035  | 16.771 | 1.00 |
|      | 17.10      |      | C   |    |        |        |        |      |
| ATOM | 205        | C    | THR | 18 | 27.692 | 7.728  | 16.424 | 1.00 |
|      | 10.63      |      | C   |    |        |        |        |      |
| ATOM | 206        | O    | THR | 18 | 28.174 | 6.625  | 16.673 | 1.00 |
|      | 6.49       |      | O   |    |        |        |        |      |
| ATOM | 207        | CB   | THR | 18 | 26.191 | 8.832  | 18.076 | 1.00 |
|      | 28.52      |      | C   |    |        |        |        |      |
| ATOM | 208        | CG2  | THR | 18 | 24.803 | 9.438  | 18.259 | 1.00 |
|      | 45.38      |      | C   |    |        |        |        |      |
| ATOM | 209        | OG1  | THR | 18 | 26.488 | 7.975  | 19.164 | 1.00 |
|      | 26.49      |      | O   |    |        |        |        |      |
| ATOM | 210        | HN   | THR | 18 | 25.843 | 6.077  | 17.479 | 1.00 |
|      | 13.96      |      | H   |    |        |        |        |      |
| ATOM | 211        | HA   | THR | 18 | 25.817 | 8.635  | 15.979 | 1.00 |
|      | 26.43      |      | H   |    |        |        |        |      |
| ATOM | 212        | HB   | THR | 18 | 26.920 | 9.627  | 18.038 | 1.00 |
|      | 37.43      |      | H   |    |        |        |        |      |
| ATOM | 213        | HG1  | THR | 18 | 25.686 | 7.859  | 19.679 | 1.00 |
|      | 71.62      |      | H   |    |        |        |        |      |
| ATOM | 214        | HG21 | THR | 18 | 24.052 | 8.697  | 18.032 |      |
|      | 1.00100.44 |      |     |    |        |        |        | H    |
| ATOM | 215        | HG22 | THR | 18 | 24.692 | 10.282 | 17.594 |      |
|      | 1.00129.42 |      |     |    |        |        |        | H    |
| ATOM | 216        | HG23 | THR | 18 | 24.689 | 9.768  | 19.281 |      |
|      | 1.00156.21 |      |     |    |        |        |        | H    |
| ATOM | 217        | N    | VAL | 19 | 28.377 | 8.715  | 15.865 | 1.00 |
|      | 16.32      |      | N   |    |        |        |        |      |
| ATOM | 218        | CA   | VAL | 19 | 29.763 | 8.573  | 15.489 | 1.00 |
|      | 13.34      |      | C   |    |        |        |        |      |
| ATOM | 219        | C    | VAL | 19 | 30.228 | 9.866  | 14.853 | 1.00 |
|      | 25.88      |      | C   |    |        |        |        |      |
| ATOM | 220        | O    | VAL | 19 | 29.687 | 10.328 | 13.848 | 1.00 |
|      | 42.11      |      | O   |    |        |        |        |      |
| ATOM | 221        | CB   | VAL | 19 | 29.975 | 7.401  | 14.534 | 1.00 |
|      | 15.48      |      | C   |    |        |        |        |      |
| ATOM | 222        | CG1  | VAL | 19 | 28.973 | 7.477  | 13.378 | 1.00 |
|      | 29.06      |      | C   |    |        |        |        |      |

|            |     |      |     |    |        |        |        |      |
|------------|-----|------|-----|----|--------|--------|--------|------|
| ATOM       | 223 | CG2  | VAL | 19 | 31.404 | 7.460  | 13.981 | 1.00 |
| 20.67      |     | C    |     |    |        |        |        |      |
| ATOM       | 224 | HN   | VAL | 19 | 27.947 | 9.575  | 15.712 | 1.00 |
| 26.89      |     | H    |     |    |        |        |        |      |
| ATOM       | 225 | HA   | VAL | 19 | 30.348 | 8.402  | 16.385 | 1.00 |
| 8.08       |     | H    |     |    |        |        |        |      |
| ATOM       | 226 | HB   | VAL | 19 | 29.836 | 6.478  | 15.075 | 1.00 |
| 11.49      |     | H    |     |    |        |        |        |      |
| ATOM       | 227 | HG11 | VAL | 19 | 27.976 | 7.613  | 13.771 |      |
| 1.00137.43 |     |      |     |    |        |        |        | H    |
| ATOM       | 228 | HG12 | VAL | 19 | 29.012 | 6.561  | 12.808 | 1.00 |
| 93.29      |     | H    |     |    |        |        |        |      |
| ATOM       | 229 | HG13 | VAL | 19 | 29.224 | 8.309  | 12.738 |      |
| 1.00108.69 |     |      |     |    |        |        |        | H    |
| ATOM       | 230 | HG21 | VAL | 19 | 31.661 | 6.510  | 13.538 | 1.00 |
| 99.42      |     | H    |     |    |        |        |        |      |
| ATOM       | 231 | HG22 | VAL | 19 | 32.091 | 7.684  | 14.787 |      |
| 1.00111.36 |     |      |     |    |        |        |        | H    |
| ATOM       | 232 | HG23 | VAL | 19 | 31.467 | 8.238  | 13.233 | 1.00 |
| 77.11      |     | H    |     |    |        |        |        |      |
| ATOM       | 233 | N    | PHE | 20 | 31.207 | 10.449 | 15.491 | 1.00 |
| 24.58      |     | N    |     |    |        |        |        |      |
| ATOM       | 234 | CA   | PHE | 20 | 31.773 | 11.723 | 15.076 | 1.00 |
| 40.34      |     | C    |     |    |        |        |        |      |
| ATOM       | 235 | C    | PHE | 20 | 33.057 | 11.547 | 14.264 | 1.00 |
| 40.37      |     | C    |     |    |        |        |        |      |
| ATOM       | 236 | O    | PHE | 20 | 33.018 | 11.430 | 13.039 | 1.00 |
| 66.02      |     | O    |     |    |        |        |        |      |
| ATOM       | 237 | CB   | PHE | 20 | 32.044 | 12.566 | 16.335 | 1.00 |
| 48.79      |     | C    |     |    |        |        |        |      |
| ATOM       | 238 | CG   | PHE | 20 | 32.406 | 11.671 | 17.513 | 1.00 |
| 35.75      |     | C    |     |    |        |        |        |      |
| ATOM       | 239 | CD1  | PHE | 20 | 31.433 | 10.841 | 18.106 | 1.00 |
| 30.20      |     | C    |     |    |        |        |        |      |
| ATOM       | 240 | CD2  | PHE | 20 | 33.709 | 11.686 | 18.027 | 1.00 |
| 40.95      |     | C    |     |    |        |        |        |      |
| ATOM       | 241 | CE1  | PHE | 20 | 31.773 | 10.035 | 19.196 | 1.00 |
| 30.41      |     | C    |     |    |        |        |        |      |
| ATOM       | 242 | CE2  | PHE | 20 | 34.045 | 10.875 | 19.117 | 1.00 |
| 45.84      |     | C    |     |    |        |        |        |      |
| ATOM       | 243 | CZ   | PHE | 20 | 33.077 | 10.050 | 19.702 | 1.00 |
| 40.81      |     | C    |     |    |        |        |        |      |
| ATOM       | 244 | HN   | PHE | 20 | 31.539 | 10.022 | 16.297 | 1.00 |
| 16.73      |     | H    |     |    |        |        |        |      |
| ATOM       | 245 | HA   | PHE | 20 | 31.052 | 12.247 | 14.461 | 1.00 |
| 59.91      |     | H    |     |    |        |        |        |      |
| ATOM       | 246 | HB1  | PHE | 20 | 31.157 | 13.117 | 16.580 | 1.00 |
| 67.15      |     | H    |     |    |        |        |        |      |
| ATOM       | 247 | HB2  | PHE | 20 | 32.850 | 13.261 | 16.148 | 1.00 |
| 58.17      |     | H    |     |    |        |        |        |      |
| ATOM       | 248 | HD1  | PHE | 20 | 30.423 | 10.813 | 17.717 | 1.00 |
| 33.34      |     | H    |     |    |        |        |        |      |

|            |     |     |     |    |        |        |        |      |
|------------|-----|-----|-----|----|--------|--------|--------|------|
| ATOM       | 249 | HD2 | PHE | 20 | 34.458 | 12.320 | 17.580 | 1.00 |
| 49.35      |     | H   |     |    |        |        |        |      |
| ATOM       | 250 | HE1 | PHE | 20 | 31.025 | 9.402  | 19.648 | 1.00 |
| 30.61      |     | H   |     |    |        |        |        |      |
| ATOM       | 251 | HE2 | PHE | 20 | 35.052 | 10.886 | 19.508 | 1.00 |
| 61.27      |     | H   |     |    |        |        |        |      |
| ATOM       | 252 | HZ  | PHE | 20 | 33.336 | 9.426  | 20.545 | 1.00 |
| 52.66      |     | H   |     |    |        |        |        |      |
| ATOM       | 253 | N   | GLU | 21 | 34.189 | 11.565 | 14.953 | 1.00 |
| 41.31      |     | N   |     |    |        |        |        |      |
| ATOM       | 254 | CA  | GLU | 21 | 35.483 | 11.446 | 14.291 | 1.00 |
| 56.16      |     | C   |     |    |        |        |        |      |
| ATOM       | 255 | C   | GLU | 21 | 35.694 | 10.030 | 13.760 | 1.00 |
| 58.61      |     | C   |     |    |        |        |        |      |
| ATOM       | 256 | O   | GLU | 21 | 36.304 | 9.829  | 12.710 |      |
| 1.00201.19 |     | O   |     |    |        |        |        |      |
| ATOM       | 257 | CB  | GLU | 21 | 36.575 | 11.856 | 15.291 | 1.00 |
| 57.37      |     | C   |     |    |        |        |        |      |
| ATOM       | 258 | CG  | GLU | 21 | 37.102 | 10.653 | 16.077 |      |
| 1.00193.56 |     | C   |     |    |        |        |        |      |
| ATOM       | 259 | CD  | GLU | 21 | 37.879 | 11.130 | 17.300 |      |
| 1.00304.62 |     | C   |     |    |        |        |        |      |
| ATOM       | 260 | OE1 | GLU | 21 | 37.248 | 11.599 | 18.233 |      |
| 1.00451.81 |     | O   |     |    |        |        |        |      |
| ATOM       | 261 | OE2 | GLU | 21 | 39.094 | 11.021 | 17.286 |      |
| 1.00442.88 |     | O1- |     |    |        |        |        |      |
| ATOM       | 262 | HN  | GLU | 21 | 34.156 | 11.682 | 15.925 | 1.00 |
| 50.82      |     | H   |     |    |        |        |        |      |
| ATOM       | 263 | HA  | GLU | 21 | 35.504 | 12.132 | 13.456 | 1.00 |
| 85.72      |     | H   |     |    |        |        |        |      |
| ATOM       | 264 | HB1 | GLU | 21 | 36.137 | 12.554 | 15.984 | 1.00 |
| 46.37      |     | H   |     |    |        |        |        |      |
| ATOM       | 265 | HB2 | GLU | 21 | 37.393 | 12.331 | 14.769 |      |
| 1.00131.81 |     | H   |     |    |        |        |        |      |
| ATOM       | 266 | HG1 | GLU | 21 | 37.758 | 10.075 | 15.444 |      |
| 1.00314.91 |     | H   |     |    |        |        |        |      |
| ATOM       | 267 | HG2 | GLU | 21 | 36.271 | 10.043 | 16.398 |      |
| 1.00266.92 |     | H   |     |    |        |        |        |      |
| ATOM       | 268 | N   | GLY | 22 | 35.162 | 9.060  | 14.490 | 1.00 |
| 86.70      |     | N   |     |    |        |        |        |      |
| ATOM       | 269 | CA  | GLY | 22 | 35.265 | 7.646  | 14.095 |      |
| 1.00104.66 |     | C   |     |    |        |        |        |      |
| ATOM       | 270 | C   | GLY | 22 | 36.272 | 6.888  | 14.953 | 1.00 |
| 71.50      |     | C   |     |    |        |        |        |      |
| ATOM       | 271 | O   | GLY | 22 | 36.328 | 5.659  | 14.915 | 1.00 |
| 89.87      |     | O   |     |    |        |        |        |      |
| ATOM       | 272 | HN  | GLY | 22 | 34.683 | 9.302  | 15.313 |      |
| 1.00214.64 |     | H   |     |    |        |        |        |      |
| ATOM       | 273 | HA1 | GLY | 22 | 35.570 | 7.581  | 13.059 |      |
| 1.00152.47 |     | H   |     |    |        |        |        |      |
| ATOM       | 274 | HA2 | GLY | 22 | 34.296 | 7.183  | 14.204 |      |
| 1.00118.15 |     | H   |     |    |        |        |        |      |

|            |     |     |     |     |        |       |        |      |
|------------|-----|-----|-----|-----|--------|-------|--------|------|
| ATOM       | 275 | N   | ASP | 23  | 37.053 | 7.619 | 15.732 | 1.00 |
| 44.68      |     |     | N   |     |        |       |        |      |
| ATOM       | 276 | CA  | ASP | 23  | 38.043 | 6.999 | 16.603 | 1.00 |
| 43.33      |     |     | C   |     |        |       |        |      |
| ATOM       | 277 | C   | ASP | 23  | 37.343 | 6.074 | 17.589 | 1.00 |
| 37.55      |     |     | C   |     |        |       |        |      |
| ATOM       | 278 | O   | ASP | 23  | 37.793 | 4.958 | 17.844 | 1.00 |
| 61.37      |     |     | O   |     |        |       |        |      |
| ATOM       | 279 | CB  | ASP | 23  | 38.813 | 8.078 | 17.364 | 1.00 |
| 40.74      |     |     | C   |     |        |       |        |      |
| ATOM       | 280 | CG  | ASP | 23  | 39.895 | 7.436 | 18.226 |      |
| 1.00141.86 |     |     |     | C   |        |       |        |      |
| ATOM       | 281 | OD1 | ASP | 23  | 40.828 | 6.889 | 17.661 |      |
| 1.00328.18 |     |     |     | O   |        |       |        |      |
| ATOM       | 282 | OD2 | ASP | 23  | 39.776 | 7.501 | 19.437 |      |
| 1.00304.58 |     |     |     | O1- |        |       |        |      |
| ATOM       | 283 | HN  | ASP | 23  | 36.958 | 8.588 | 15.728 | 1.00 |
| 40.86      |     |     | H   |     |        |       |        |      |
| ATOM       | 284 | HA  | ASP | 23  | 38.732 | 6.425 | 16.005 | 1.00 |
| 72.12      |     |     | H   |     |        |       |        |      |
| ATOM       | 285 | HB1 | ASP | 23  | 38.131 | 8.627 | 17.997 | 1.00 |
| 94.15      |     |     | H   |     |        |       |        |      |
| ATOM       | 286 | HB2 | ASP | 23  | 39.272 | 8.756 | 16.658 | 1.00 |
| 93.26      |     |     | H   |     |        |       |        |      |
| ATOM       | 287 | N   | MET | 24  | 36.226 | 6.554 | 18.123 | 1.00 |
| 23.24      |     |     | N   |     |        |       |        |      |
| ATOM       | 288 | CA  | MET | 24  | 35.427 | 5.785 | 19.075 | 1.00 |
| 32.50      |     |     | C   |     |        |       |        |      |
| ATOM       | 289 | C   | MET | 24  | 33.948 | 5.965 | 18.753 | 1.00 |
| 25.13      |     |     | C   |     |        |       |        |      |
| ATOM       | 290 | O   | MET | 24  | 33.420 | 7.074 | 18.832 | 1.00 |
| 54.40      |     |     | O   |     |        |       |        |      |
| ATOM       | 291 | CB  | MET | 24  | 35.707 | 6.268 | 20.500 | 1.00 |
| 47.36      |     |     | C   |     |        |       |        |      |
| ATOM       | 292 | CG  | MET | 24  | 34.871 | 5.461 | 21.495 |      |
| 1.00151.73 |     |     |     | C   |        |       |        |      |
| ATOM       | 293 | SD  | MET | 24  | 35.311 | 5.942 | 23.185 |      |
| 1.00209.23 |     |     |     | S   |        |       |        |      |
| ATOM       | 294 | CE  | MET | 24  | 34.599 | 7.607 | 23.157 |      |
| 1.00243.29 |     |     |     | C   |        |       |        |      |
| ATOM       | 295 | HN  | MET | 24  | 35.924 | 7.448 | 17.863 | 1.00 |
| 17.32      |     |     | H   |     |        |       |        |      |
| ATOM       | 296 | HA  | MET | 24  | 35.679 | 4.736 | 19.001 | 1.00 |
| 48.94      |     |     | H   |     |        |       |        |      |
| ATOM       | 297 | HB1 | MET | 24  | 35.449 | 7.314 | 20.581 |      |
| 1.00124.40 |     |     |     | H   |        |       |        |      |
| ATOM       | 298 | HB2 | MET | 24  | 36.756 | 6.140 | 20.724 |      |
| 1.00166.96 |     |     |     | H   |        |       |        |      |
| ATOM       | 299 | HG1 | MET | 24  | 35.069 | 4.408 | 21.360 |      |
| 1.00331.71 |     |     |     | H   |        |       |        |      |
| ATOM       | 300 | HG2 | MET | 24  | 33.821 | 5.651 | 21.328 |      |
| 1.00302.30 |     |     |     | H   |        |       |        |      |

|            |     |      |     |    |        |       |        |      |
|------------|-----|------|-----|----|--------|-------|--------|------|
| ATOM       | 301 | HE1  | MET | 24 | 35.301 | 8.292 | 22.702 |      |
| 1.00340.44 |     |      |     |    |        |       |        | H    |
| ATOM       | 302 | HE2  | MET | 24 | 34.392 | 7.928 | 24.166 |      |
| 1.00373.88 |     |      |     |    |        |       |        | H    |
| ATOM       | 303 | HE3  | MET | 24 | 33.678 | 7.599 | 22.592 |      |
| 1.00386.81 |     |      |     |    |        |       |        | H    |
| ATOM       | 304 | N    | VAL | 25 | 33.282 | 4.877 | 18.383 | 1.00 |
| 22.44      |     |      | N   |    |        |       |        |      |
| ATOM       | 305 | CA   | VAL | 25 | 31.865 | 4.948 | 18.047 | 1.00 |
| 15.37      |     |      | C   |    |        |       |        |      |
| ATOM       | 306 | C    | VAL | 25 | 31.017 | 5.056 | 19.306 | 1.00 |
| 17.47      |     |      | C   |    |        |       |        |      |
| ATOM       | 307 | O    | VAL | 25 | 31.387 | 4.560 | 20.370 | 1.00 |
| 29.52      |     |      | O   |    |        |       |        |      |
| ATOM       | 308 | CB   | VAL | 25 | 31.432 | 3.724 | 17.242 | 1.00 |
| 23.36      |     |      | C   |    |        |       |        |      |
| ATOM       | 309 | CG1  | VAL | 25 | 29.926 | 3.806 | 16.975 | 1.00 |
| 58.39      |     |      | C   |    |        |       |        |      |
| ATOM       | 310 | CG2  | VAL | 25 | 32.186 | 3.699 | 15.909 | 1.00 |
| 55.25      |     |      | C   |    |        |       |        |      |
| ATOM       | 311 | HN   | VAL | 25 | 33.750 | 4.017 | 18.331 | 1.00 |
| 48.11      |     |      | H   |    |        |       |        |      |
| ATOM       | 312 | HA   | VAL | 25 | 31.699 | 5.833 | 17.446 | 1.00 |
| 9.25       |     |      | H   |    |        |       |        |      |
| ATOM       | 313 | HB   | VAL | 25 | 31.653 | 2.827 | 17.802 | 1.00 |
| 52.45      |     |      | H   |    |        |       |        |      |
| ATOM       | 314 | HG11 | VAL | 25 | 29.665 | 4.818 | 16.694 |      |
| 1.00171.07 |     |      |     |    |        |       |        | H    |
| ATOM       | 315 | HG12 | VAL | 25 | 29.388 | 3.533 | 17.870 |      |
| 1.00166.22 |     |      |     |    |        |       |        | H    |
| ATOM       | 316 | HG13 | VAL | 25 | 29.661 | 3.130 | 16.176 |      |
| 1.00134.76 |     |      |     |    |        |       |        | H    |
| ATOM       | 317 | HG21 | VAL | 25 | 32.146 | 4.677 | 15.455 |      |
| 1.00141.88 |     |      |     |    |        |       |        | H    |
| ATOM       | 318 | HG22 | VAL | 25 | 31.725 | 2.977 | 15.250 |      |
| 1.00184.50 |     |      |     |    |        |       |        | H    |
| ATOM       | 319 | HG23 | VAL | 25 | 33.215 | 3.422 | 16.082 |      |
| 1.00133.90 |     |      |     |    |        |       |        | H    |
| ATOM       | 320 | N    | THR | 26 | 29.877 | 5.728 | 19.170 | 1.00 |
| 13.60      |     |      | N   |    |        |       |        |      |
| ATOM       | 321 | CA   | THR | 26 | 28.958 | 5.935 | 20.286 | 1.00 |
| 21.19      |     |      | C   |    |        |       |        |      |
| ATOM       | 322 | C    | THR | 26 | 27.538 | 5.518 | 19.908 | 1.00 |
| 16.55      |     |      | C   |    |        |       |        |      |
| ATOM       | 323 | O    | THR | 26 | 27.097 | 5.730 | 18.779 | 1.00 |
| 11.43      |     |      | O   |    |        |       |        |      |
| ATOM       | 324 | CB   | THR | 26 | 28.981 | 7.413 | 20.671 | 1.00 |
| 27.07      |     |      | C   |    |        |       |        |      |
| ATOM       | 325 | CG2  | THR | 26 | 27.970 | 7.682 | 21.789 | 1.00 |
| 44.39      |     |      | C   |    |        |       |        |      |
| ATOM       | 326 | OG1  | THR | 26 | 30.285 | 7.753 | 21.120 | 1.00 |
| 34.75      |     |      | O   |    |        |       |        |      |

|            |     |      |     |    |        |        |        |      |
|------------|-----|------|-----|----|--------|--------|--------|------|
| ATOM       | 327 | HN   | THR | 26 | 29.652 | 6.106  | 18.295 | 1.00 |
| 10.81      |     |      | H   |    |        |        |        |      |
| ATOM       | 328 | HA   | THR | 26 | 29.279 | 5.350  | 21.138 | 1.00 |
| 33.16      |     |      | H   |    |        |        |        |      |
| ATOM       | 329 | HB   | THR | 26 | 28.733 | 8.007  | 19.802 | 1.00 |
| 20.60      |     |      | H   |    |        |        |        |      |
| ATOM       | 330 | HG1  | THR | 26 | 30.790 | 6.940  | 21.207 | 1.00 |
| 77.72      |     |      | H   |    |        |        |        |      |
| ATOM       | 331 | HG21 | THR | 26 | 28.131 | 6.981  | 22.595 |      |
| 1.00126.99 |     |      | H   |    |        |        |        |      |
| ATOM       | 332 | HG22 | THR | 26 | 26.967 | 7.566  | 21.409 |      |
| 1.00108.32 |     |      | H   |    |        |        |        |      |
| ATOM       | 333 | HG23 | THR | 26 | 28.101 | 8.688  | 22.156 |      |
| 1.00151.99 |     |      | H   |    |        |        |        |      |
| ATOM       | 334 | N    | ARG | 27 | 26.828 | 4.923  | 20.867 | 1.00 |
| 22.38      |     |      | N   |    |        |        |        |      |
| ATOM       | 335 | CA   | ARG | 27 | 25.452 | 4.473  | 20.642 | 1.00 |
| 20.21      |     |      | C   |    |        |        |        |      |
| ATOM       | 336 | C    | ARG | 27 | 24.630 | 4.645  | 21.917 | 1.00 |
| 16.96      |     |      | C   |    |        |        |        |      |
| ATOM       | 337 | O    | ARG | 27 | 25.187 | 4.795  | 23.005 | 1.00 |
| 20.06      |     |      | O   |    |        |        |        |      |
| ATOM       | 338 | CB   | ARG | 27 | 25.445 | 3.003  | 20.212 | 1.00 |
| 22.14      |     |      | C   |    |        |        |        |      |
| ATOM       | 339 | CG   | ARG | 27 | 25.954 | 2.126  | 21.358 |      |
| 1.00124.30 |     |      | C   |    |        |        |        |      |
| ATOM       | 340 | CD   | ARG | 27 | 26.133 | 0.691  | 20.862 |      |
| 1.00109.38 |     |      | C   |    |        |        |        |      |
| ATOM       | 341 | NE   | ARG | 27 | 26.564 | -0.172 | 21.958 |      |
| 1.00227.73 |     |      | N   |    |        |        |        |      |
| ATOM       | 342 | CZ   | ARG | 27 | 27.839 | -0.225 | 22.332 |      |
| 1.00426.12 |     |      | C   |    |        |        |        |      |
| ATOM       | 343 | NH1  | ARG | 27 | 28.198 | -1.004 | 23.314 |      |
| 1.00767.09 |     |      | N1+ |    |        |        |        |      |
| ATOM       | 344 | NH2  | ARG | 27 | 28.730 | 0.504  | 21.717 |      |
| 1.00581.78 |     |      | N   |    |        |        |        |      |
| ATOM       | 345 | HN   | ARG | 27 | 27.237 | 4.783  | 21.747 | 1.00 |
| 30.75      |     |      | H   |    |        |        |        |      |
| ATOM       | 346 | HA   | ARG | 27 | 25.005 | 5.069  | 19.858 | 1.00 |
| 23.13      |     |      | H   |    |        |        |        |      |
| ATOM       | 347 | HB1  | ARG | 27 | 26.088 | 2.877  | 19.354 | 1.00 |
| 87.46      |     |      | H   |    |        |        |        |      |
| ATOM       | 348 | HB2  | ARG | 27 | 24.438 | 2.709  | 19.954 |      |
| 1.00103.36 |     |      | H   |    |        |        |        |      |
| ATOM       | 349 | HG1  | ARG | 27 | 25.238 | 2.136  | 22.167 |      |
| 1.00281.97 |     |      | H   |    |        |        |        |      |
| ATOM       | 350 | HG2  | ARG | 27 | 26.902 | 2.507  | 21.711 |      |
| 1.00276.19 |     |      | H   |    |        |        |        |      |
| ATOM       | 351 | HD1  | ARG | 27 | 26.877 | 0.675  | 20.078 |      |
| 1.00183.60 |     |      | H   |    |        |        |        |      |
| ATOM       | 352 | HD2  | ARG | 27 | 25.195 | 0.328  | 20.472 |      |
| 1.00142.93 |     |      | H   |    |        |        |        |      |

|            |     |      |     |    |        |        |        |      |  |
|------------|-----|------|-----|----|--------|--------|--------|------|--|
| ATOM       | 353 | HE   | ARG | 27 | 25.902 | -0.723 | 22.425 |      |  |
| 1.00372.53 |     |      |     |    |        |        |        | H    |  |
| ATOM       | 354 | HH11 | ARG | 27 | 27.515 | -1.563 | 23.786 |      |  |
| 1.00910.59 |     |      |     |    |        |        |        | H    |  |
| ATOM       | 355 | HH12 | ARG | 27 | 29.157 | -1.044 | 23.597 |      |  |
| 1.00999.99 |     |      |     |    |        |        |        | H    |  |
| ATOM       | 356 | HH21 | ARG | 27 | 28.454 | 1.100  | 20.964 |      |  |
| 1.00532.54 |     |      |     |    |        |        |        | H    |  |
| ATOM       | 357 | HH22 | ARG | 27 | 29.689 | 0.463  | 22.000 |      |  |
| 1.00948.84 |     |      |     |    |        |        |        | H    |  |
| ATOM       | 358 | N    | SER | 28 | 23.304 | 4.632  | 21.783 | 1.00 |  |
| 14.60      |     |      | N   |    |        |        |        |      |  |
| ATOM       | 359 | CA   | SER | 28 | 22.425 | 4.799  | 22.941 | 1.00 |  |
| 14.92      |     |      | C   |    |        |        |        |      |  |
| ATOM       | 360 | C    | SER | 28 | 21.110 | 4.052  | 22.741 | 1.00 |  |
| 12.12      |     |      | C   |    |        |        |        |      |  |
| ATOM       | 361 | O    | SER | 28 | 20.663 | 3.848  | 21.613 | 1.00 |  |
| 13.41      |     |      | O   |    |        |        |        |      |  |
| ATOM       | 362 | CB   | SER | 28 | 22.140 | 6.283  | 23.169 | 1.00 |  |
| 23.26      |     |      | C   |    |        |        |        |      |  |
| ATOM       | 363 | OG   | SER | 28 | 21.317 | 6.429  | 24.318 |      |  |
| 1.00146.32 |     |      |     |    |        |        |        | O    |  |
| ATOM       | 364 | HN   | SER | 28 | 22.909 | 4.517  | 20.892 | 1.00 |  |
| 15.23      |     |      | H   |    |        |        |        |      |  |
| ATOM       | 365 | HA   | SER | 28 | 22.916 | 4.403  | 23.819 | 1.00 |  |
| 15.44      |     |      | H   |    |        |        |        |      |  |
| ATOM       | 366 | HB1  | SER | 28 | 21.641 | 6.690  | 22.300 | 1.00 |  |
| 88.73      |     |      | H   |    |        |        |        |      |  |
| ATOM       | 367 | HB2  | SER | 28 | 23.066 | 6.810  | 23.326 |      |  |
| 1.00124.68 |     |      |     |    |        |        |        | H    |  |
| ATOM       | 368 | HG   | SER | 28 | 21.121 | 5.553  | 24.657 |      |  |
| 1.00242.47 |     |      |     |    |        |        |        | H    |  |
| ATOM       | 369 | N    | CYS | 29 | 20.495 | 3.653  | 23.851 | 1.00 |  |
| 10.48      |     |      | N   |    |        |        |        |      |  |
| ATOM       | 370 | CA   | CYS | 29 | 19.228 | 2.934  | 23.805 | 1.00 |  |
| 9.97       |     |      | C   |    |        |        |        |      |  |
| ATOM       | 371 | C    | CYS | 29 | 18.633 | 2.862  | 25.211 | 1.00 |  |
| 11.60      |     |      | C   |    |        |        |        |      |  |
| ATOM       | 372 | O    | CYS | 29 | 19.328 | 2.524  | 26.170 | 1.00 |  |
| 15.64      |     |      | O   |    |        |        |        |      |  |
| ATOM       | 373 | CB   | CYS | 29 | 19.443 | 1.522  | 23.236 | 1.00 |  |
| 9.52       |     |      | C   |    |        |        |        |      |  |
| ATOM       | 374 | SG   | CYS | 29 | 17.965 | 0.985  | 22.362 | 1.00 |  |
| 10.40      |     |      | S   |    |        |        |        |      |  |
| ATOM       | 375 | HN   | CYS | 29 | 20.898 | 3.856  | 24.720 | 1.00 |  |
| 11.10      |     |      | H   |    |        |        |        |      |  |
| ATOM       | 376 | HA   | CYS | 29 | 18.546 | 3.474  | 23.165 | 1.00 |  |
| 11.08      |     |      | H   |    |        |        |        |      |  |
| ATOM       | 377 | HB1  | CYS | 29 | 19.646 | 0.821  | 24.036 | 1.00 |  |
| 9.33       |     |      | H   |    |        |        |        |      |  |
| ATOM       | 378 | HB2  | CYS | 29 | 20.275 | 1.529  | 22.552 | 1.00 |  |
| 10.78      |     |      | H   |    |        |        |        |      |  |

|            |     |     |     |     |        |        |        |      |
|------------|-----|-----|-----|-----|--------|--------|--------|------|
| ATOM       | 379 | N   | GLU | 30  | 17.349 | 3.196  | 25.333 | 1.00 |
| 13.52      |     |     | N   |     |        |        |        |      |
| ATOM       | 380 | CA  | GLU | 30  | 16.676 | 3.182  | 26.635 | 1.00 |
| 17.41      |     |     | C   |     |        |        |        |      |
| ATOM       | 381 | C   | GLU | 30  | 15.789 | 1.951  | 26.788 | 1.00 |
| 10.81      |     |     | C   |     |        |        |        |      |
| ATOM       | 382 | O   | GLU | 30  | 15.245 | 1.437  | 25.810 | 1.00 |
| 23.22      |     |     | O   |     |        |        |        |      |
| ATOM       | 383 | CB  | GLU | 30  | 15.829 | 4.445  | 26.783 | 1.00 |
| 37.83      |     |     | C   |     |        |        |        |      |
| ATOM       | 384 | CG  | GLU | 30  | 16.739 | 5.672  | 26.717 |      |
| 1.00108.13 |     |     |     | C   |        |        |        |      |
| ATOM       | 385 | CD  | GLU | 30  | 17.586 | 5.760  | 27.982 |      |
| 1.00240.52 |     |     |     | C   |        |        |        |      |
| ATOM       | 386 | OE1 | GLU | 30  | 17.270 | 5.064  | 28.933 |      |
| 1.00422.56 |     |     |     | O   |        |        |        |      |
| ATOM       | 387 | OE2 | GLU | 30  | 18.538 | 6.523  | 27.982 |      |
| 1.00410.81 |     |     |     | O1- |        |        |        |      |
| ATOM       | 388 | HN  | GLU | 30  | 16.846 | 3.469  | 24.537 | 1.00 |
| 15.61      |     |     | H   |     |        |        |        |      |
| ATOM       | 389 | HA  | GLU | 30  | 17.416 | 3.174  | 27.424 | 1.00 |
| 24.60      |     |     | H   |     |        |        |        |      |
| ATOM       | 390 | HB1 | GLU | 30  | 15.317 | 4.428  | 27.733 | 1.00 |
| 72.67      |     |     | H   |     |        |        |        |      |
| ATOM       | 391 | HB2 | GLU | 30  | 15.104 | 4.487  | 25.982 | 1.00 |
| 56.47      |     |     | H   |     |        |        |        |      |
| ATOM       | 392 | HG1 | GLU | 30  | 16.137 | 6.563  | 26.627 |      |
| 1.00196.66 |     |     |     | H   |        |        |        |      |
| ATOM       | 393 | HG2 | GLU | 30  | 17.390 | 5.586  | 25.859 |      |
| 1.00140.67 |     |     |     | H   |        |        |        |      |
| ATOM       | 394 | N   | LYS | 31  | 15.650 | 1.487  | 28.030 | 1.00 |
| 11.96      |     |     | N   |     |        |        |        |      |
| ATOM       | 395 | CA  | LYS | 31  | 14.826 | 0.312  | 28.330 | 1.00 |
| 11.40      |     |     | C   |     |        |        |        |      |
| ATOM       | 396 | C   | LYS | 31  | 13.544 | 0.732  | 29.042 | 1.00 |
| 10.99      |     |     | C   |     |        |        |        |      |
| ATOM       | 397 | O   | LYS | 31  | 13.538 | 1.691  | 29.814 | 1.00 |
| 12.86      |     |     | O   |     |        |        |        |      |
| ATOM       | 398 | CB  | LYS | 31  | 15.609 | -0.653 | 29.222 | 1.00 |
| 21.40      |     |     | C   |     |        |        |        |      |
| ATOM       | 399 | CG  | LYS | 31  | 16.832 | -1.171 | 28.464 | 1.00 |
| 57.81      |     |     | C   |     |        |        |        |      |
| ATOM       | 400 | CD  | LYS | 31  | 17.617 | -2.137 | 29.354 |      |
| 1.00115.52 |     |     |     | C   |        |        |        |      |
| ATOM       | 401 | CE  | LYS | 31  | 18.841 | -2.652 | 28.596 |      |
| 1.00250.23 |     |     |     | C   |        |        |        |      |
| ATOM       | 402 | NZ  | LYS | 31  | 19.608 | -3.586 | 29.468 |      |
| 1.00462.10 |     |     |     | N1+ |        |        |        |      |
| ATOM       | 403 | HN  | LYS | 31  | 16.110 | 1.945  | 28.764 | 1.00 |
| 26.13      |     |     | H   |     |        |        |        |      |
| ATOM       | 404 | HA  | LYS | 31  | 14.567 | -0.195 | 27.413 | 1.00 |
| 13.87      |     |     | H   |     |        |        |        |      |



|            |     |      |     |    |        |        |        |      |
|------------|-----|------|-----|----|--------|--------|--------|------|
| ATOM       | 405 | HB1  | LYS | 31 | 14.979 | -1.486 | 29.493 | 1.00 |
| 37.63      |     |      | H   |    |        |        |        |      |
| ATOM       | 406 | HB2  | LYS | 31 | 15.930 | -0.138 | 30.116 | 1.00 |
| 47.19      |     |      | H   |    |        |        |        |      |
| ATOM       | 407 | HG1  | LYS | 31 | 17.468 | -0.340 | 28.192 |      |
| 1.00126.32 |     |      | H   |    |        |        |        |      |
| ATOM       | 408 | HG2  | LYS | 31 | 16.511 | -1.685 | 27.570 |      |
| 1.00114.19 |     |      | H   |    |        |        |        |      |
| ATOM       | 409 | HD1  | LYS | 31 | 16.985 | -2.970 | 29.622 |      |
| 1.00198.45 |     |      | H   |    |        |        |        |      |
| ATOM       | 410 | HD2  | LYS | 31 | 17.935 | -1.624 | 30.249 |      |
| 1.00200.14 |     |      | H   |    |        |        |        |      |
| ATOM       | 411 | HE1  | LYS | 31 | 19.470 | -1.818 | 28.321 |      |
| 1.00374.64 |     |      | H   |    |        |        |        |      |
| ATOM       | 412 | HE2  | LYS | 31 | 18.522 | -3.171 | 27.705 |      |
| 1.00403.27 |     |      | H   |    |        |        |        |      |
| ATOM       | 413 | HZ1  | LYS | 31 | 20.627 | -3.419 | 29.344 |      |
| 1.00627.38 |     |      | H   |    |        |        |        |      |
| ATOM       | 414 | HZ2  | LYS | 31 | 19.383 | -4.568 | 29.205 |      |
| 1.00622.26 |     |      | H   |    |        |        |        |      |
| ATOM       | 415 | HZ3  | LYS | 31 | 19.352 | -3.425 | 30.462 |      |
| 1.00619.20 |     |      | H   |    |        |        |        |      |
| ATOM       | 416 | N    | THR | 32 | 12.459 | 0.009  | 28.775 | 1.00 |
| 15.51      |     |      | N   |    |        |        |        |      |
| ATOM       | 417 | CA   | THR | 32 | 11.167 | 0.312  | 29.391 | 1.00 |
| 22.44      |     |      | C   |    |        |        |        |      |
| ATOM       | 418 | C    | THR | 32 | 10.941 | -0.560 | 30.624 | 1.00 |
| 26.60      |     |      | C   |    |        |        |        |      |
| ATOM       | 419 | O    | THR | 32 | 10.953 | -1.788 | 30.538 | 1.00 |
| 57.43      |     |      | O   |    |        |        |        |      |
| ATOM       | 420 | CB   | THR | 32 | 10.042 | 0.066  | 28.384 | 1.00 |
| 56.28      |     |      | C   |    |        |        |        |      |
| ATOM       | 421 | CG2  | THR | 32 | 8.692  | 0.369  | 29.038 |      |
| 1.00102.70 |     |      | C   |    |        |        |        |      |
| ATOM       | 422 | OG1  | THR | 32 | 10.225 | 0.912  | 27.258 |      |
| 1.00111.17 |     |      | O   |    |        |        |        |      |
| ATOM       | 423 | HN   | THR | 32 | 12.526 | -0.742 | 28.150 | 1.00 |
| 18.79      |     |      | H   |    |        |        |        |      |
| ATOM       | 424 | HA   | THR | 32 | 11.143 | 1.352  | 29.689 | 1.00 |
| 19.67      |     |      | H   |    |        |        |        |      |
| ATOM       | 425 | HB   | THR | 32 | 10.060 | -0.965 | 28.067 | 1.00 |
| 84.25      |     |      | H   |    |        |        |        |      |
| ATOM       | 426 | HG1  | THR | 32 | 10.449 | 0.360  | 26.505 |      |
| 1.00205.03 |     |      | H   |    |        |        |        |      |
| ATOM       | 427 | HG21 | THR | 32 | 7.923  | 0.395  | 28.281 |      |
| 1.00220.71 |     |      | H   |    |        |        |        |      |
| ATOM       | 428 | HG22 | THR | 32 | 8.741  | 1.326  | 29.535 |      |
| 1.00174.67 |     |      | H   |    |        |        |        |      |
| ATOM       | 429 | HG23 | THR | 32 | 8.462  | -0.401 | 29.759 |      |
| 1.00217.44 |     |      | H   |    |        |        |        |      |
| ATOM       | 430 | N    | THR | 33 | 10.733 | 0.086  | 31.768 | 1.00 |
| 22.47      |     |      | N   |    |        |        |        |      |

|            |     |      |     |    |        |        |        |      |
|------------|-----|------|-----|----|--------|--------|--------|------|
| ATOM       | 431 | CA   | THR | 33 | 10.498 | -0.632 | 33.020 | 1.00 |
| 41.60      |     |      | C   |    |        |        |        |      |
| ATOM       | 432 | C    | THR | 33 | 9.622  | 0.175  | 33.936 | 1.00 |
| 38.03      |     |      | C   |    |        |        |        |      |
| ATOM       | 433 | O    | THR | 33 | 10.098 | 0.889  | 34.819 | 1.00 |
| 52.73      |     |      | O   |    |        |        |        |      |
| ATOM       | 434 | CB   | THR | 33 | 11.818 | -0.953 | 33.716 | 1.00 |
| 63.25      |     |      | C   |    |        |        |        |      |
| ATOM       | 435 | CG2  | THR | 33 | 12.578 | -2.012 | 32.917 |      |
| 1.00121.65 |     |      | C   |    |        |        |        |      |
| ATOM       | 436 | OG1  | THR | 33 | 12.601 | 0.228  | 33.813 | 1.00 |
| 96.20      |     |      | O   |    |        |        |        |      |
| ATOM       | 437 | HN   | THR | 33 | 10.731 | 1.067  | 31.772 | 1.00 |
| 23.82      |     |      | H   |    |        |        |        |      |
| ATOM       | 438 | HA   | THR | 33 | 9.976  | -1.547 | 32.818 | 1.00 |
| 67.12      |     |      | H   |    |        |        |        |      |
| ATOM       | 439 | HB   | THR | 33 | 11.612 | -1.333 | 34.704 |      |
| 1.00107.59 |     |      | H   |    |        |        |        |      |
| ATOM       | 440 | HG1  | THR | 33 | 13.210 | 0.243  | 33.070 |      |
| 1.00176.27 |     |      | H   |    |        |        |        |      |
| ATOM       | 441 | HG21 | THR | 33 | 13.428 | -2.354 | 33.490 |      |
| 1.00255.23 |     |      | H   |    |        |        |        |      |
| ATOM       | 442 | HG22 | THR | 33 | 12.921 | -1.584 | 31.987 |      |
| 1.00245.37 |     |      | H   |    |        |        |        |      |
| ATOM       | 443 | HG23 | THR | 33 | 11.925 | -2.846 | 32.711 |      |
| 1.00185.78 |     |      | H   |    |        |        |        |      |
| ATOM       | 444 | N    | GLY | 34 | 8.329  | 0.036  | 33.723 | 1.00 |
| 40.93      |     |      | N   |    |        |        |        |      |
| ATOM       | 445 | CA   | GLY | 34 | 7.363  | 0.732  | 34.536 | 1.00 |
| 45.59      |     |      | C   |    |        |        |        |      |
| ATOM       | 446 | C    | GLY | 34 | 7.245  | 2.188  | 34.105 | 1.00 |
| 40.97      |     |      | C   |    |        |        |        |      |
| ATOM       | 447 | O    | GLY | 34 | 6.416  | 2.937  | 34.619 | 1.00 |
| 82.17      |     |      | O   |    |        |        |        |      |
| ATOM       | 448 | HN   | GLY | 34 | 8.022  | -0.562 | 33.012 | 1.00 |
| 54.00      |     |      | H   |    |        |        |        |      |
| ATOM       | 449 | HA1  | GLY | 34 | 7.692  | 0.684  | 35.556 | 1.00 |
| 54.41      |     |      | H   |    |        |        |        |      |
| ATOM       | 450 | HA2  | GLY | 34 | 6.400  | 0.247  | 34.445 | 1.00 |
| 62.09      |     |      | H   |    |        |        |        |      |
| ATOM       | 451 | N    | ASN | 35 | 8.082  | 2.574  | 33.147 | 1.00 |
| 32.51      |     |      | N   |    |        |        |        |      |
| ATOM       | 452 | CA   | ASN | 35 | 8.077  | 3.937  | 32.629 | 1.00 |
| 33.20      |     |      | C   |    |        |        |        |      |
| ATOM       | 453 | C    | ASN | 35 | 8.704  | 3.972  | 31.241 | 1.00 |
| 23.17      |     |      | C   |    |        |        |        |      |
| ATOM       | 454 | O    | ASN | 35 | 9.582  | 3.167  | 30.928 | 1.00 |
| 27.01      |     |      | O   |    |        |        |        |      |
| ATOM       | 455 | CB   | ASN | 35 | 8.858  | 4.862  | 33.565 | 1.00 |
| 54.51      |     |      | C   |    |        |        |        |      |
| ATOM       | 456 | CG   | ASN | 35 | 8.295  | 4.784  | 34.973 | 1.00 |
| 80.73      |     |      | C   |    |        |        |        |      |

|            |     |      |     |    |       |       |        |      |
|------------|-----|------|-----|----|-------|-------|--------|------|
| ATOM       | 457 | ND2  | ASN | 35 | 7.083 | 5.190 | 35.198 |      |
| 1.00220.46 |     |      | N   |    |       |       |        |      |
| ATOM       | 458 | OD1  | ASN | 35 | 8.982 | 4.345 | 35.895 |      |
| 1.00117.80 |     |      | O   |    |       |       |        |      |
| ATOM       | 459 | HN   | ASN | 35 | 8.715 | 1.925 | 32.776 | 1.00 |
| 51.15      |     |      | H   |    |       |       |        |      |
| ATOM       | 460 | HA   | ASN | 35 | 7.057 | 4.287 | 32.564 | 1.00 |
| 47.21      |     |      | H   |    |       |       |        |      |
| ATOM       | 461 | HB1  | ASN | 35 | 8.786 | 5.878 | 33.206 | 1.00 |
| 68.31      |     |      | H   |    |       |       |        |      |
| ATOM       | 462 | HB2  | ASN | 35 | 9.889 | 4.562 | 33.586 | 1.00 |
| 57.75      |     |      | H   |    |       |       |        |      |
| ATOM       | 463 | HD21 | ASN | 35 | 6.538 | 5.542 | 34.464 |      |
| 1.00405.39 |     |      | H   |    |       |       |        |      |
| ATOM       | 464 | HD22 | ASN | 35 | 6.719 | 5.142 | 36.099 |      |
| 1.00245.64 |     |      | H   |    |       |       |        |      |
| ATOM       | 465 | N    | PHE | 36 | 8.248 | 4.902 | 30.407 | 1.00 |
| 35.72      |     |      | N   |    |       |       |        |      |
| ATOM       | 466 | CA   | PHE | 36 | 8.760 | 5.033 | 29.052 | 1.00 |
| 33.41      |     |      | C   |    |       |       |        |      |
| ATOM       | 467 | C    | PHE | 36 | 9.815 | 6.131 | 28.976 | 1.00 |
| 28.51      |     |      | C   |    |       |       |        |      |
| ATOM       | 468 | O    | PHE | 36 | 9.670 | 7.191 | 29.584 | 1.00 |
| 45.23      |     |      | O   |    |       |       |        |      |
| ATOM       | 469 | CB   | PHE | 36 | 7.601 | 5.369 | 28.123 | 1.00 |
| 67.53      |     |      | C   |    |       |       |        |      |
| ATOM       | 470 | CG   | PHE | 36 | 6.645 | 4.203 | 28.083 | 1.00 |
| 86.71      |     |      | C   |    |       |       |        |      |
| ATOM       | 471 | CD1  | PHE | 36 | 5.543 | 4.174 | 28.947 |      |
| 1.00106.51 |     |      | C   |    |       |       |        |      |
| ATOM       | 472 | CD2  | PHE | 36 | 6.858 | 3.150 | 27.186 | 1.00 |
| 99.48      |     |      | C   |    |       |       |        |      |
| ATOM       | 473 | CE1  | PHE | 36 | 4.654 | 3.093 | 28.913 |      |
| 1.00134.48 |     |      | C   |    |       |       |        |      |
| ATOM       | 474 | CE2  | PHE | 36 | 5.971 | 2.069 | 27.152 |      |
| 1.00134.27 |     |      | C   |    |       |       |        |      |
| ATOM       | 475 | CZ   | PHE | 36 | 4.869 | 2.040 | 28.015 |      |
| 1.00149.48 |     |      | C   |    |       |       |        |      |
| ATOM       | 476 | HN   | PHE | 36 | 7.543 | 5.513 | 30.704 | 1.00 |
| 62.87      |     |      | H   |    |       |       |        |      |
| ATOM       | 477 | HA   | PHE | 36 | 9.199 | 4.097 | 28.735 | 1.00 |
| 28.53      |     |      | H   |    |       |       |        |      |
| ATOM       | 478 | HB1  | PHE | 36 | 7.978 | 5.560 | 27.139 | 1.00 |
| 73.56      |     |      | H   |    |       |       |        |      |
| ATOM       | 479 | HB2  | PHE | 36 | 7.087 | 6.246 | 28.490 | 1.00 |
| 88.42      |     |      | H   |    |       |       |        |      |
| ATOM       | 480 | HD1  | PHE | 36 | 5.381 | 4.987 | 29.641 |      |
| 1.00110.20 |     |      | H   |    |       |       |        |      |
| ATOM       | 481 | HD2  | PHE | 36 | 7.711 | 3.172 | 26.522 | 1.00 |
| 93.07      |     |      | H   |    |       |       |        |      |
| ATOM       | 482 | HE1  | PHE | 36 | 3.805 | 3.071 | 29.578 |      |
| 1.00155.06 |     |      | H   |    |       |       |        |      |

|            |     |      |     |    |        |        |        |      |
|------------|-----|------|-----|----|--------|--------|--------|------|
| ATOM       | 483 | HE2  | PHE | 36 | 6.135  | 1.256  | 26.460 |      |
| 1.00159.46 |     |      | H   |    |        |        |        |      |
| ATOM       | 484 | HZ   | PHE | 36 | 4.183  | 1.206  | 27.988 |      |
| 1.00183.25 |     |      | H   |    |        |        |        |      |
| ATOM       | 485 | N    | THR | 37 | 10.880 | 5.868  | 28.219 | 1.00 |
| 20.06      |     |      | N   |    |        |        |        |      |
| ATOM       | 486 | CA   | THR | 37 | 11.963 | 6.835  | 28.056 | 1.00 |
| 27.18      |     |      | C   |    |        |        |        |      |
| ATOM       | 487 | C    | THR | 37 | 12.563 | 6.718  | 26.661 | 1.00 |
| 41.87      |     |      | C   |    |        |        |        |      |
| ATOM       | 488 | O    | THR | 37 | 13.097 | 5.675  | 26.286 |      |
| 1.00169.86 |     |      | O   |    |        |        |        |      |
| ATOM       | 489 | CB   | THR | 37 | 13.049 | 6.585  | 29.106 | 1.00 |
| 26.52      |     |      | C   |    |        |        |        |      |
| ATOM       | 490 | CG2  | THR | 37 | 12.475 | 6.824  | 30.503 | 1.00 |
| 75.69      |     |      | C   |    |        |        |        |      |
| ATOM       | 491 | OG1  | THR | 37 | 13.505 | 5.243  | 29.001 | 1.00 |
| 81.95      |     |      | O   |    |        |        |        |      |
| ATOM       | 492 | HN   | THR | 37 | 10.936 | 5.009  | 27.756 | 1.00 |
| 18.47      |     |      | H   |    |        |        |        |      |
| ATOM       | 493 | HA   | THR | 37 | 11.574 | 7.835  | 28.187 | 1.00 |
| 38.80      |     |      | H   |    |        |        |        |      |
| ATOM       | 494 | HB   | THR | 37 | 13.873 | 7.260  | 28.939 | 1.00 |
| 81.60      |     |      | H   |    |        |        |        |      |
| ATOM       | 495 | HG1  | THR | 37 | 13.195 | 4.764  | 29.774 |      |
| 1.00188.80 |     |      | H   |    |        |        |        |      |
| ATOM       | 496 | HG21 | THR | 37 | 11.953 | 7.769  | 30.522 |      |
| 1.00196.98 |     |      | H   |    |        |        |        |      |
| ATOM       | 497 | HG22 | THR | 37 | 13.280 | 6.843  | 31.224 |      |
| 1.00196.23 |     |      | H   |    |        |        |        |      |
| ATOM       | 498 | HG23 | THR | 37 | 11.789 | 6.028  | 30.751 |      |
| 1.00168.92 |     |      | H   |    |        |        |        |      |
| ATOM       | 499 | N    | GLU | 38 | 12.466 | 7.797  | 25.896 | 1.00 |
| 26.53      |     |      | N   |    |        |        |        |      |
| ATOM       | 500 | CA   | GLU | 38 | 12.998 | 7.814  | 24.538 | 1.00 |
| 30.29      |     |      | C   |    |        |        |        |      |
| ATOM       | 501 | C    | GLU | 38 | 14.517 | 7.951  | 24.551 | 1.00 |
| 25.39      |     |      | C   |    |        |        |        |      |
| ATOM       | 502 | O    | GLU | 38 | 15.104 | 8.388  | 25.541 | 1.00 |
| 51.60      |     |      | O   |    |        |        |        |      |
| ATOM       | 503 | CB   | GLU | 38 | 12.386 | 8.980  | 23.755 | 1.00 |
| 54.82      |     |      | C   |    |        |        |        |      |
| ATOM       | 504 | CG   | GLU | 38 | 10.895 | 8.720  | 23.536 |      |
| 1.00165.84 |     |      | C   |    |        |        |        |      |
| ATOM       | 505 | CD   | GLU | 38 | 10.255 | 9.917  | 22.840 |      |
| 1.00292.92 |     |      | C   |    |        |        |        |      |
| ATOM       | 506 | OE1  | GLU | 38 | 9.108  | 9.802  | 22.443 |      |
| 1.00414.19 |     |      | O   |    |        |        |        |      |
| ATOM       | 507 | OE2  | GLU | 38 | 10.922 | 10.931 | 22.714 |      |
| 1.00537.65 |     |      | O1- |    |        |        |        |      |
| ATOM       | 508 | HN   | GLU | 38 | 12.025 | 8.594  | 26.251 | 1.00 |
| 84.50      |     |      | H   |    |        |        |        |      |

|            |     |     |     |    |        |        |        |      |
|------------|-----|-----|-----|----|--------|--------|--------|------|
| ATOM       | 509 | HA  | GLU | 38 | 12.734 | 6.891  | 24.047 | 1.00 |
| 32.15      |     |     | H   |    |        |        |        |      |
| ATOM       | 510 | HB1 | GLU | 38 | 12.879 | 9.068  | 22.800 |      |
| 1.00144.82 |     |     | H   |    |        |        |        |      |
| ATOM       | 511 | HB2 | GLU | 38 | 12.516 | 9.895  | 24.314 |      |
| 1.00106.49 |     |     | H   |    |        |        |        |      |
| ATOM       | 512 | HG1 | GLU | 38 | 10.414 | 8.563  | 24.490 |      |
| 1.00303.31 |     |     | H   |    |        |        |        |      |
| ATOM       | 513 | HG2 | GLU | 38 | 10.771 | 7.841  | 22.923 |      |
| 1.00323.99 |     |     | H   |    |        |        |        |      |
| ATOM       | 514 | N   | CYS | 39 | 15.147 | 7.577  | 23.441 | 1.00 |
| 15.84      |     |     | N   |    |        |        |        |      |
| ATOM       | 515 | CA  | CYS | 39 | 16.598 | 7.665  | 23.326 | 1.00 |
| 14.30      |     |     | C   |    |        |        |        |      |
| ATOM       | 516 | C   | CYS | 39 | 17.051 | 9.119  | 23.504 | 1.00 |
| 22.31      |     |     | C   |    |        |        |        |      |
| ATOM       | 517 | O   | CYS | 39 | 16.304 | 10.043 | 23.183 | 1.00 |
| 32.92      |     |     | O   |    |        |        |        |      |
| ATOM       | 518 | CB  | CYS | 39 | 17.034 | 7.147  | 21.952 | 1.00 |
| 18.08      |     |     | C   |    |        |        |        |      |
| ATOM       | 519 | SG  | CYS | 39 | 15.915 | 7.797  | 20.685 | 1.00 |
| 17.41      |     |     | S   |    |        |        |        |      |
| ATOM       | 520 | HN  | CYS | 39 | 14.625 | 7.244  | 22.684 | 1.00 |
| 24.87      |     |     | H   |    |        |        |        |      |
| ATOM       | 521 | HA  | CYS | 39 | 17.044 | 7.047  | 24.088 | 1.00 |
| 14.60      |     |     | H   |    |        |        |        |      |
| ATOM       | 522 | HB1 | CYS | 39 | 16.995 | 6.067  | 21.946 | 1.00 |
| 27.71      |     |     | H   |    |        |        |        |      |
| ATOM       | 523 | HB2 | CYS | 39 | 18.041 | 7.472  | 21.744 | 1.00 |
| 34.91      |     |     | H   |    |        |        |        |      |
| ATOM       | 524 | N   | PRO | 40 | 18.244 | 9.348  | 24.007 | 1.00 |
| 27.27      |     |     | N   |    |        |        |        |      |
| ATOM       | 525 | CA  | PRO | 40 | 18.765 | 10.730 | 24.222 | 1.00 |
| 47.66      |     |     | C   |    |        |        |        |      |
| ATOM       | 526 | C   | PRO | 40 | 19.185 | 11.391 | 22.911 | 1.00 |
| 71.54      |     |     | C   |    |        |        |        |      |
| ATOM       | 527 | O   | PRO | 40 | 19.870 | 10.787 | 22.087 | 1.00 |
| 87.70      |     |     | O   |    |        |        |        |      |
| ATOM       | 528 | CB  | PRO | 40 | 19.967 | 10.513 | 25.147 | 1.00 |
| 53.85      |     |     | C   |    |        |        |        |      |
| ATOM       | 529 | CG  | PRO | 40 | 20.470 | 9.154  | 24.788 | 1.00 |
| 46.04      |     |     | C   |    |        |        |        |      |
| ATOM       | 530 | CD  | PRO | 40 | 19.230 | 8.333  | 24.422 | 1.00 |
| 25.70      |     |     | C   |    |        |        |        |      |
| ATOM       | 531 | HA  | PRO | 40 | 18.025 | 11.333 | 24.723 | 1.00 |
| 58.04      |     |     | H   |    |        |        |        |      |
| ATOM       | 532 | HB1 | PRO | 40 | 19.654 | 10.530 | 26.181 | 1.00 |
| 67.93      |     |     | H   |    |        |        |        |      |
| ATOM       | 533 | HB2 | PRO | 40 | 20.728 | 11.264 | 24.969 | 1.00 |
| 70.99      |     |     | H   |    |        |        |        |      |
| ATOM       | 534 | HG1 | PRO | 40 | 20.973 | 8.702  | 25.630 | 1.00 |
| 65.91      |     |     | H   |    |        |        |        |      |

|            |     |      |     |    |        |        |        |      |
|------------|-----|------|-----|----|--------|--------|--------|------|
| ATOM       | 535 | HG2  | PRO | 40 | 21.143 | 9.219  | 23.941 | 1.00 |
| 54.99      |     |      | H   |    |        |        |        |      |
| ATOM       | 536 | HD1  | PRO | 40 | 18.868 | 7.789  | 25.281 | 1.00 |
| 24.22      |     |      | H   |    |        |        |        |      |
| ATOM       | 537 | HD2  | PRO | 40 | 19.448 | 7.661  | 23.605 | 1.00 |
| 26.94      |     |      | H   |    |        |        |        |      |
| ATOM       | 538 | N    | GLY | 41 | 18.775 | 12.640 | 22.736 |      |
| 1.00105.24 |     |      | N   |    |        |        |        |      |
| ATOM       | 539 | CA   | GLY | 41 | 19.117 | 13.387 | 21.532 |      |
| 1.00147.55 |     |      | C   |    |        |        |        |      |
| ATOM       | 540 | C    | GLY | 41 | 20.622 | 13.594 | 21.432 |      |
| 1.00161.74 |     |      | C   |    |        |        |        |      |
| ATOM       | 541 | O    | GLY | 41 | 21.204 | 13.499 | 20.351 |      |
| 1.00244.37 |     |      | O   |    |        |        |        |      |
| ATOM       | 542 | HN   | GLY | 41 | 18.237 | 13.067 | 23.433 |      |
| 1.00121.79 |     |      | H   |    |        |        |        |      |
| ATOM       | 543 | HA1  | GLY | 41 | 18.630 | 14.350 | 21.560 |      |
| 1.00184.40 |     |      | H   |    |        |        |        |      |
| ATOM       | 544 | HA2  | GLY | 41 | 18.774 | 12.840 | 20.668 |      |
| 1.00157.34 |     |      | H   |    |        |        |        |      |
| ATOM       | 545 | N    | LEU | 42 | 21.246 | 13.878 | 22.573 |      |
| 1.00162.48 |     |      | N   |    |        |        |        |      |
| ATOM       | 546 | CA   | LEU | 42 | 22.694 | 14.105 | 22.632 |      |
| 1.00191.48 |     |      | C   |    |        |        |        |      |
| ATOM       | 547 | C    | LEU | 42 | 23.361 | 13.039 | 23.494 |      |
| 1.00166.66 |     |      | C   |    |        |        |        |      |
| ATOM       | 548 | O    | LEU | 42 | 22.777 | 12.555 | 24.464 |      |
| 1.00251.38 |     |      | O   |    |        |        |        |      |
| ATOM       | 549 | CB   | LEU | 42 | 22.976 | 15.486 | 23.229 |      |
| 1.00307.99 |     |      | C   |    |        |        |        |      |
| ATOM       | 550 | CG   | LEU | 42 | 22.252 | 16.568 | 22.419 |      |
| 1.00452.28 |     |      | C   |    |        |        |        |      |
| ATOM       | 551 | CD1  | LEU | 42 | 22.498 | 17.932 | 23.071 |      |
| 1.00681.24 |     |      | C   |    |        |        |        |      |
| ATOM       | 552 | CD2  | LEU | 42 | 22.777 | 16.585 | 20.973 |      |
| 1.00527.46 |     |      | C   |    |        |        |        |      |
| ATOM       | 553 | HN   | LEU | 42 | 20.719 | 13.938 | 23.396 |      |
| 1.00195.47 |     |      | H   |    |        |        |        |      |
| ATOM       | 554 | HA   | LEU | 42 | 23.113 | 14.060 | 21.637 |      |
| 1.00229.77 |     |      | H   |    |        |        |        |      |
| ATOM       | 555 | HB1  | LEU | 42 | 24.041 | 15.674 | 23.204 |      |
| 1.00342.49 |     |      | H   |    |        |        |        |      |
| ATOM       | 556 | HB2  | LEU | 42 | 22.633 | 15.512 | 24.253 |      |
| 1.00335.33 |     |      | H   |    |        |        |        |      |
| ATOM       | 557 | HG   | LEU | 42 | 21.191 | 16.359 | 22.416 |      |
| 1.00427.79 |     |      | H   |    |        |        |        |      |
| ATOM       | 558 | HD11 | LEU | 42 | 22.276 | 17.872 | 24.126 |      |
| 1.00909.71 |     |      | H   |    |        |        |        |      |
| ATOM       | 559 | HD12 | LEU | 42 | 21.859 | 18.671 | 22.611 |      |
| 1.00706.80 |     |      | H   |    |        |        |        |      |
| ATOM       | 560 | HD13 | LEU | 42 | 23.532 | 18.214 | 22.937 |      |
| 1.00858.82 |     |      | H   |    |        |        |        |      |

|            |     |      |     |    |        |        |        |
|------------|-----|------|-----|----|--------|--------|--------|
| ATOM       | 561 | HD21 | LEU | 42 | 22.270 | 15.825 | 20.397 |
| 1.00631.69 |     |      | H   |    |        |        |        |
| ATOM       | 562 | HD22 | LEU | 42 | 23.840 | 16.391 | 20.967 |
| 1.00628.06 |     |      | H   |    |        |        |        |
| ATOM       | 563 | HD23 | LEU | 42 | 22.588 | 17.552 | 20.528 |
| 1.00656.75 |     |      | H   |    |        |        |        |
| ATOM       | 564 | N    | THR | 43 | 24.589 | 12.679 | 23.135 |
| 1.00178.52 |     |      | N   |    |        |        |        |
| ATOM       | 565 | CA   | THR | 43 | 25.327 | 11.670 | 23.886 |
| 1.00240.84 |     |      | C   |    |        |        |        |
| ATOM       | 566 | C    | THR | 43 | 25.695 | 12.207 | 25.275 |
| 1.00372.31 |     |      | C   |    |        |        |        |
| ATOM       | 567 | O    | THR | 43 | 25.899 | 13.411 | 25.436 |
| 1.00500.13 |     |      | O   |    |        |        |        |
| ATOM       | 568 | CB   | THR | 43 | 26.599 | 11.296 | 23.117 |
| 1.00354.13 |     |      | C   |    |        |        |        |
| ATOM       | 569 | CG2  | THR | 43 | 26.221 | 10.735 | 21.745 |
| 1.00463.04 |     |      | C   |    |        |        |        |
| ATOM       | 570 | OG1  | THR | 43 | 27.405 | 12.454 | 22.949 |
| 1.00508.50 |     |      | O   |    |        |        |        |
| ATOM       | 571 | HN   | THR | 43 | 25.006 | 13.099 | 22.355 |
| 1.00229.59 |     |      | H   |    |        |        |        |
| ATOM       | 572 | HA   | THR | 43 | 24.708 | 10.794 | 23.987 |
| 1.00249.90 |     |      | H   |    |        |        |        |
| ATOM       | 573 | HB   | THR | 43 | 27.152 | 10.552 | 23.666 |
| 1.00481.58 |     |      | H   |    |        |        |        |
| ATOM       | 574 | HG1  | THR | 43 | 27.050 | 12.959 | 22.213 |
| 1.00624.31 |     |      | H   |    |        |        |        |
| ATOM       | 575 | HG21 | THR | 43 | 25.805 | 9.746  | 21.864 |
| 1.00650.95 |     |      | H   |    |        |        |        |
| ATOM       | 576 | HG22 | THR | 43 | 27.102 | 10.682 | 21.122 |
| 1.00580.73 |     |      | H   |    |        |        |        |
| ATOM       | 577 | HG23 | THR | 43 | 25.490 | 11.380 | 21.282 |
| 1.00571.99 |     |      | H   |    |        |        |        |
| ATOM       | 578 | N    | PRO | 44 | 25.787 | 11.359 | 26.276 |
| 1.00488.39 |     |      | N   |    |        |        |        |
| ATOM       | 579 | CA   | PRO | 44 | 26.138 | 11.794 | 27.663 |
| 1.00760.13 |     |      | C   |    |        |        |        |
| ATOM       | 580 | C    | PRO | 44 | 27.613 | 12.181 | 27.789 |
| 1.00735.36 |     |      | C   |    |        |        |        |
| ATOM       | 581 | O    | PRO | 44 | 28.024 | 12.775 | 28.786 |
| 1.00999.99 |     |      | O   |    |        |        |        |
| ATOM       | 582 | CB   | PRO | 44 | 25.806 | 10.564 | 28.518 |
| 1.00999.99 |     |      | C   |    |        |        |        |
| ATOM       | 583 | CG   | PRO | 44 | 25.993 | 9.405  | 27.597 |
| 1.00856.94 |     |      | C   |    |        |        |        |
| ATOM       | 584 | CD   | PRO | 44 | 25.569 | 9.897  | 26.211 |
| 1.00548.09 |     |      | C   |    |        |        |        |
| ATOM       | 585 | HA   | PRO | 44 | 25.513 | 12.620 | 27.961 |
| 1.00939.00 |     |      | H   |    |        |        |        |
| ATOM       | 586 | HB1  | PRO | 44 | 24.779 | 10.606 | 28.855 |
| 1.00999.99 |     |      | H   |    |        |        |        |

|            |     |      |     |    |        |        |        |
|------------|-----|------|-----|----|--------|--------|--------|
| ATOM       | 587 | HB2  | PRO | 44 | 26.477 | 10.493 | 29.365 |
| 1.00999.99 |     |      |     | H  |        |        |        |
| ATOM       | 588 | HG1  | PRO | 44 | 25.369 | 8.577  | 27.899 |
| 1.00999.99 |     |      |     | H  |        |        |        |
| ATOM       | 589 | HG2  | PRO | 44 | 27.034 | 9.103  | 27.587 |
| 1.00853.53 |     |      |     | H  |        |        |        |
| ATOM       | 590 | HD1  | PRO | 44 | 24.525 | 9.684  | 26.034 |
| 1.00602.45 |     |      |     | H  |        |        |        |
| ATOM       | 591 | HD2  | PRO | 44 | 26.186 | 9.449  | 25.445 |
| 1.00463.32 |     |      |     | H  |        |        |        |
| ATOM       | 592 | N    | ILE | 45 | 28.402 | 11.836 | 26.776 |
| 1.00518.33 |     |      |     | N  |        |        |        |
| ATOM       | 593 | CA   | ILE | 45 | 29.829 | 12.146 | 26.788 |
| 1.00582.79 |     |      |     | C  |        |        |        |
| ATOM       | 594 | C    | ILE | 45 | 30.077 | 13.556 | 27.321 |
| 1.00795.93 |     |      |     | C  |        |        |        |
| ATOM       | 595 | O    | ILE | 45 | 29.337 | 14.488 | 27.004 |
| 1.00898.75 |     |      |     | O  |        |        |        |
| ATOM       | 596 | CB   | ILE | 45 | 30.399 | 12.027 | 25.372 |
| 1.00474.41 |     |      |     | C  |        |        |        |
| ATOM       | 597 | CG1  | ILE | 45 | 31.926 | 12.135 | 25.424 |
| 1.00516.90 |     |      |     | C  |        |        |        |
| ATOM       | 598 | CG2  | ILE | 45 | 29.839 | 13.148 | 24.492 |
| 1.00760.75 |     |      |     | C  |        |        |        |
| ATOM       | 599 | CD1  | ILE | 45 | 32.513 | 11.751 | 24.064 |
| 1.00566.81 |     |      |     | C  |        |        |        |
| ATOM       | 600 | HN   | ILE | 45 | 28.020 | 11.362 | 26.009 |
| 1.00395.72 |     |      |     | H  |        |        |        |
| ATOM       | 601 | HA   | ILE | 45 | 30.333 | 11.437 | 27.427 |
| 1.00711.06 |     |      |     | H  |        |        |        |
| ATOM       | 602 | HB   | ILE | 45 | 30.120 | 11.070 | 24.953 |
| 1.00477.81 |     |      |     | H  |        |        |        |
| ATOM       | 603 | HG11 | ILE | 45 | 32.311 | 11.466 | 26.179 |
| 1.00624.28 |     |      |     | H  |        |        |        |
| ATOM       | 604 | HG12 | ILE | 45 | 32.207 | 13.150 | 25.666 |
| 1.00744.84 |     |      |     | H  |        |        |        |
| ATOM       | 605 | HG21 | ILE | 45 | 30.001 | 12.906 | 23.453 |
| 1.00920.57 |     |      |     | H  |        |        |        |
| ATOM       | 606 | HG22 | ILE | 45 | 30.339 | 14.077 | 24.728 |
| 1.00999.99 |     |      |     | H  |        |        |        |
| ATOM       | 607 | HG23 | ILE | 45 | 28.780 | 13.256 | 24.677 |
| 1.00865.46 |     |      |     | H  |        |        |        |
| ATOM       | 608 | HD11 | ILE | 45 | 33.592 | 11.749 | 24.126 |
| 1.00658.89 |     |      |     | H  |        |        |        |
| ATOM       | 609 | HD12 | ILE | 45 | 32.198 | 12.469 | 23.322 |
| 1.00734.30 |     |      |     | H  |        |        |        |
| ATOM       | 610 | HD13 | ILE | 45 | 32.166 | 10.767 | 23.786 |
| 1.00675.84 |     |      |     | H  |        |        |        |
| ATOM       | 611 | N    | ALA | 46 | 31.121 | 13.703 | 28.129 |
| 1.00999.99 |     |      |     | N  |        |        |        |
| ATOM       | 612 | CA   | ALA | 46 | 31.457 | 15.002 | 28.699 |
| 1.00999.99 |     |      |     | C  |        |        |        |



|            |     |     |     |    |        |        |        |
|------------|-----|-----|-----|----|--------|--------|--------|
| ATOM       | 613 | C   | ALA | 46 | 31.765 | 16.009 | 27.596 |
| 1.00999.99 |     |     |     | C  |        |        |        |
| ATOM       | 614 | CB  | ALA | 46 | 32.667 | 14.869 | 29.626 |
| 1.00999.99 |     |     |     | C  |        |        |        |
| ATOM       | 615 | OT1 | ALA | 46 | 32.931 | 16.173 | 27.279 |
| 1.00999.99 |     |     |     | O  |        |        |        |
| ATOM       | 616 | OT2 | ALA | 46 | 30.829 | 16.601 | 27.084 |
| 1.00999.99 |     |     |     | O  |        |        |        |
| ATOM       | 617 | HN  | ALA | 46 | 31.675 | 12.925 | 28.345 |
| 1.00999.99 |     |     |     | H  |        |        |        |
| ATOM       | 618 | HA  | ALA | 46 | 30.616 | 15.360 | 29.275 |
| 1.00999.99 |     |     |     | H  |        |        |        |
| ATOM       | 619 | HB1 | ALA | 46 | 33.502 | 14.467 | 29.071 |
| 1.00999.99 |     |     |     | H  |        |        |        |
| ATOM       | 620 | HB2 | ALA | 46 | 32.425 | 14.206 | 30.443 |
| 1.00999.99 |     |     |     | H  |        |        |        |
| ATOM       | 621 | HB3 | ALA | 46 | 32.930 | 15.842 | 30.016 |
| 1.00999.99 |     |     |     | H  |        |        |        |
| ENDMDL     |     |     |     |    |        |        |        |
| TER        |     |     |     |    |        |        |        |
| MODEL      | 12  |     |     |    |        |        |        |
| ATOM       | 1   | N   | GLY | 1  | 26.359 | -2.764 | 18.853 |
| 1.00999.99 |     |     |     | N  |        |        |        |
| ATOM       | 2   | CA  | GLY | 1  | 26.472 | -2.687 | 17.369 |
| 1.00999.99 |     |     |     | C  |        |        |        |
| ATOM       | 3   | C   | GLY | 1  | 25.533 | -1.607 | 16.842 |
| 1.00999.99 |     |     |     | C  |        |        |        |
| ATOM       | 4   | O   | GLY | 1  | 25.083 | -0.742 | 17.592 |
| 1.00999.99 |     |     |     | O  |        |        |        |
| ATOM       | 5   | HA1 | GLY | 1  | 26.199 | -3.638 | 16.937 |
| 1.00999.99 |     |     |     | H  |        |        |        |
| ATOM       | 6   | HA2 | GLY | 1  | 27.490 | -2.445 | 17.098 |
| 1.00999.99 |     |     |     | H  |        |        |        |
| ATOM       | 7   | HT1 | GLY | 1  | 27.308 | -2.729 | 19.276 |
| 1.00999.99 |     |     |     | H  |        |        |        |
| ATOM       | 8   | HT2 | GLY | 1  | 25.893 | -3.656 | 19.119 |
| 1.00999.99 |     |     |     | H  |        |        |        |
| ATOM       | 9   | HT3 | GLY | 1  | 25.798 | -1.961 | 19.200 |
| 1.00999.99 |     |     |     | H  |        |        |        |
| ATOM       | 10  | N   | LEU | 2  | 25.244 | -1.665 | 15.545 |
| 1.00999.99 |     |     |     | N  |        |        |        |
| ATOM       | 11  | CA  | LEU | 2  | 24.355 | -0.686 | 14.928 |
| 1.00895.59 |     |     |     | C  |        |        |        |
| ATOM       | 12  | C   | LEU | 2  | 22.905 | -0.968 | 15.307 |
| 1.00532.27 |     |     |     | C  |        |        |        |
| ATOM       | 13  | O   | LEU | 2  | 22.506 | -2.123 | 15.452 |
| 1.00625.21 |     |     |     | O  |        |        |        |
| ATOM       | 14  | CB  | LEU | 2  | 24.502 | -0.736 | 13.405 |
| 1.00999.99 |     |     |     | C  |        |        |        |
| ATOM       | 15  | CG  | LEU | 2  | 25.959 | -0.469 | 13.006 |
| 1.00999.99 |     |     |     | C  |        |        |        |
| ATOM       | 16  | CD1 | LEU | 2  | 26.098 | -0.611 | 11.487 |

|            |    |      |     |   |   |        |        |        |      |  |
|------------|----|------|-----|---|---|--------|--------|--------|------|--|
| 1.00999.99 |    |      |     | C |   |        |        |        |      |  |
| ATOM       | 17 | CD2  | LEU |   | 2 | 26.374 | 0.951  | 13.433 |      |  |
| 1.00999.99 |    |      |     | C |   |        |        |        |      |  |
| ATOM       | 18 | HN   | LEU |   | 2 | 25.632 | -2.377 | 14.997 |      |  |
| 1.00999.99 |    |      |     | H |   |        |        |        |      |  |
| ATOM       | 19 | HA   | LEU |   | 2 | 24.621 | 0.299  | 15.274 |      |  |
| 1.00890.87 |    |      |     | H |   |        |        |        |      |  |
| ATOM       | 20 | HB1  | LEU |   | 2 | 23.868 | 0.014  | 12.958 |      |  |
| 1.00924.07 |    |      |     | H |   |        |        |        |      |  |
| ATOM       | 21 | HB2  | LEU |   | 2 | 24.208 | -1.713 | 13.050 |      |  |
| 1.00999.99 |    |      |     | H |   |        |        |        |      |  |
| ATOM       | 22 | HG   | LEU |   | 2 | 26.599 | -1.193 | 13.490 |      |  |
| 1.00999.99 |    |      |     | H |   |        |        |        |      |  |
| ATOM       | 23 | HD11 | LEU |   | 2 | 25.902 | -1.633 | 11.202 |      |  |
| 1.00999.99 |    |      |     | H |   |        |        |        |      |  |
| ATOM       | 24 | HD12 | LEU |   | 2 | 27.098 | -0.338 | 11.189 |      |  |
| 1.00999.99 |    |      |     | H |   |        |        |        |      |  |
| ATOM       | 25 | HD13 | LEU |   | 2 | 25.387 | 0.040  | 10.998 |      |  |
| 1.00999.99 |    |      |     | H |   |        |        |        |      |  |
| ATOM       | 26 | HD21 | LEU |   | 2 | 27.194 | 1.294  | 12.815 |      |  |
| 1.00999.99 |    |      |     | H |   |        |        |        |      |  |
| ATOM       | 27 | HD22 | LEU |   | 2 | 26.693 | 0.938  | 14.464 |      |  |
| 1.00999.99 |    |      |     | H |   |        |        |        |      |  |
| ATOM       | 28 | HD23 | LEU |   | 2 | 25.536 | 1.626  | 13.324 |      |  |
| 1.00999.99 |    |      |     | H |   |        |        |        |      |  |
| ATOM       | 29 | N    | CYS |   | 3 | 22.122 | 0.093  | 15.466 |      |  |
| 1.00271.28 |    |      |     | N |   |        |        |        |      |  |
| ATOM       | 30 | CA   | CYS |   | 3 | 20.717 | -0.056 | 15.828 |      |  |
| 1.00104.50 |    |      |     | C |   |        |        |        |      |  |
| ATOM       | 31 | C    | CYS |   | 3 | 19.961 | -0.816 | 14.744 | 1.00 |  |
| 90.98      |    |      |     | C |   |        |        |        |      |  |
| ATOM       | 32 | O    | CYS |   | 3 | 19.114 | -1.658 | 15.036 |      |  |
| 1.00207.28 |    |      |     | O |   |        |        |        |      |  |
| ATOM       | 33 | CB   | CYS |   | 3 | 20.071 | 1.316  | 16.027 | 1.00 |  |
| 37.83      |    |      |     | C |   |        |        |        |      |  |
| ATOM       | 34 | SG   | CYS |   | 3 | 20.703 | 2.077  | 17.543 | 1.00 |  |
| 81.56      |    |      |     | S |   |        |        |        |      |  |
| ATOM       | 35 | HN   | CYS |   | 3 | 22.492 | 0.990  | 15.339 |      |  |
| 1.00296.55 |    |      |     | H |   |        |        |        |      |  |
| ATOM       | 36 | HA   | CYS |   | 3 | 20.652 | -0.607 | 16.749 |      |  |
| 1.00166.45 |    |      |     | H |   |        |        |        |      |  |
| ATOM       | 37 | HB1  | CYS |   | 3 | 19.001 | 1.202  | 16.101 | 1.00 |  |
| 40.38      |    |      |     | H |   |        |        |        |      |  |
| ATOM       | 38 | HB2  | CYS |   | 3 | 20.306 | 1.949  | 15.184 | 1.00 |  |
| 98.45      |    |      |     | H |   |        |        |        |      |  |
| ATOM       | 39 | N    | SER |   | 4 | 20.269 | -0.505 | 13.491 | 1.00 |  |
| 85.31      |    |      |     | N |   |        |        |        |      |  |
| ATOM       | 40 | CA   | SER |   | 4 | 19.607 | -1.154 | 12.362 | 1.00 |  |
| 92.94      |    |      |     | C |   |        |        |        |      |  |
| ATOM       | 41 | C    | SER |   | 4 | 18.198 | -0.595 | 12.190 | 1.00 |  |
| 67.37      |    |      |     | C |   |        |        |        |      |  |
| ATOM       | 42 | O    | SER |   | 4 | 17.695 | -0.475 | 11.073 |      |  |

|            |    |     |     |   |        |        |        |      |  |  |
|------------|----|-----|-----|---|--------|--------|--------|------|--|--|
| 1.00102.28 |    |     |     |   |        |        |        |      |  |  |
| ATOM       | 43 | CB  | SER | 4 | 19.538 | -2.670 | 12.591 |      |  |  |
| 1.00123.83 |    |     |     |   |        |        |        |      |  |  |
| ATOM       | 44 | OG  | SER | 4 | 19.567 | -3.333 | 11.334 |      |  |  |
| 1.00178.89 |    |     |     |   |        |        |        |      |  |  |
| ATOM       | 45 | HN  | SER | 4 | 20.950 | 0.179  | 13.322 |      |  |  |
| 1.00163.03 |    |     |     |   |        |        |        |      |  |  |
| ATOM       | 46 | HA  | SER | 4 | 20.174 | -0.960 | 11.465 |      |  |  |
| 1.00129.78 |    |     |     |   |        |        |        |      |  |  |
| ATOM       | 47 | HB1 | SER | 4 | 18.623 | -2.923 | 13.121 |      |  |  |
| 1.00105.26 |    |     |     |   |        |        |        |      |  |  |
| ATOM       | 48 | HB2 | SER | 4 | 20.385 | -2.986 | 13.176 |      |  |  |
| 1.00156.87 |    |     |     |   |        |        |        |      |  |  |
| ATOM       | 49 | HG  | SER | 4 | 18.813 | -3.032 | 10.821 |      |  |  |
| 1.00218.16 |    |     |     |   |        |        |        |      |  |  |
| ATOM       | 50 | N   | GLU | 5 | 17.567 | -0.267 | 13.313 | 1.00 |  |  |
| 41.67      |    |     | N   |   |        |        |        |      |  |  |
| ATOM       | 51 | CA  | GLU | 5 | 16.213 | 0.268  | 13.299 | 1.00 |  |  |
| 41.21      |    |     | C   |   |        |        |        |      |  |  |
| ATOM       | 52 | C   | GLU | 5 | 15.971 | 1.132  | 14.533 | 1.00 |  |  |
| 41.92      |    |     | C   |   |        |        |        |      |  |  |
| ATOM       | 53 | O   | GLU | 5 | 16.702 | 1.038  | 15.519 | 1.00 |  |  |
| 74.72      |    |     | O   |   |        |        |        |      |  |  |
| ATOM       | 54 | CB  | GLU | 5 | 15.211 | -0.884 | 13.265 | 1.00 |  |  |
| 49.24      |    |     | C   |   |        |        |        |      |  |  |
| ATOM       | 55 | CG  | GLU | 5 | 15.427 | -1.762 | 14.488 | 1.00 |  |  |
| 55.48      |    |     | C   |   |        |        |        |      |  |  |
| ATOM       | 56 | CD  | GLU | 5 | 14.628 | -3.054 | 14.355 | 1.00 |  |  |
| 92.06      |    |     | C   |   |        |        |        |      |  |  |
| ATOM       | 57 | OE1 | GLU | 5 | 13.955 | -3.212 | 13.350 |      |  |  |
| 1.00206.49 |    |     |     |   |        |        |        |      |  |  |
| ATOM       | 58 | OE2 | GLU | 5 | 14.700 | -3.868 | 15.263 |      |  |  |
| 1.00197.24 |    |     |     |   |        |        |        |      |  |  |
| ATOM       | 59 | HN  | GLU | 5 | 18.022 | -0.395 | 14.171 | 1.00 |  |  |
| 45.52      |    |     | H   |   |        |        |        |      |  |  |
| ATOM       | 60 | HA  | GLU | 5 | 16.080 | 0.867  | 12.421 | 1.00 |  |  |
| 60.63      |    |     | H   |   |        |        |        |      |  |  |
| ATOM       | 61 | HB1 | GLU | 5 | 15.362 | -1.469 | 12.371 | 1.00 |  |  |
| 61.59      |    |     | H   |   |        |        |        |      |  |  |
| ATOM       | 62 | HB2 | GLU | 5 | 14.209 | -0.490 | 13.274 | 1.00 |  |  |
| 63.66      |    |     | H   |   |        |        |        |      |  |  |
| ATOM       | 63 | HG1 | GLU | 5 | 15.108 | -1.232 | 15.372 | 1.00 |  |  |
| 58.03      |    |     | H   |   |        |        |        |      |  |  |
| ATOM       | 64 | HG2 | GLU | 5 | 16.477 | -1.992 | 14.569 | 1.00 |  |  |
| 57.77      |    |     | H   |   |        |        |        |      |  |  |
| ATOM       | 65 | N   | ASN | 6 | 14.950 | 1.980  | 14.469 | 1.00 |  |  |
| 50.73      |    |     | N   |   |        |        |        |      |  |  |
| ATOM       | 66 | CA  | ASN | 6 | 14.633 | 2.862  | 15.589 | 1.00 |  |  |
| 71.04      |    |     | C   |   |        |        |        |      |  |  |
| ATOM       | 67 | C   | ASN | 6 | 14.284 | 2.053  | 16.834 | 1.00 |  |  |
| 65.17      |    |     | C   |   |        |        |        |      |  |  |
| ATOM       | 68 | O   | ASN | 6 | 14.675 | 2.408  | 17.946 | 1.00 |  |  |

|            |    |      |     |     |        |        |        |      |  |
|------------|----|------|-----|-----|--------|--------|--------|------|--|
| 94.86      |    |      | O   |     |        |        |        |      |  |
| ATOM       | 69 | CB   | ASN | 6   | 13.457 | 3.767  | 15.220 | 1.00 |  |
| 94.83      |    |      | C   |     |        |        |        |      |  |
| ATOM       | 70 | CG   | ASN | 6   | 13.899 | 4.805  | 14.195 |      |  |
| 1.00160.94 |    |      |     | C   |        |        |        |      |  |
| ATOM       | 71 | ND2  | ASN | 6   | 13.004 | 5.402  | 13.457 |      |  |
| 1.00244.88 |    |      |     | N   |        |        |        |      |  |
| ATOM       | 72 | OD1  | ASN | 6   | 15.092 | 5.080  | 14.065 |      |  |
| 1.00219.73 |    |      |     | O   |        |        |        |      |  |
| ATOM       | 73 | HN   | ASN | 6   | 14.405 | 2.017  | 13.657 | 1.00 |  |
| 72.81      |    |      | H   |     |        |        |        |      |  |
| ATOM       | 74 | HA   | ASN | 6   | 15.492 | 3.479  | 15.803 | 1.00 |  |
| 96.02      |    |      | H   |     |        |        |        |      |  |
| ATOM       | 75 | HB1  | ASN | 6   | 13.099 | 4.269  | 16.107 |      |  |
| 1.00111.09 |    |      |     | H   |        |        |        |      |  |
| ATOM       | 76 | HB2  | ASN | 6   | 12.660 | 3.167  | 14.803 | 1.00 |  |
| 98.13      |    |      | H   |     |        |        |        |      |  |
| ATOM       | 77 | HD21 | ASN | 6   | 12.056 | 5.181  | 13.562 |      |  |
| 1.00272.43 |    |      |     | H   |        |        |        |      |  |
| ATOM       | 78 | HD22 | ASN | 6   | 13.281 | 6.071  | 12.795 |      |  |
| 1.00336.78 |    |      |     | H   |        |        |        |      |  |
| ATOM       | 79 | N    | GLY | 7   | 13.540 | 0.965  | 16.642 | 1.00 |  |
| 51.80      |    |      | N   |     |        |        |        |      |  |
| ATOM       | 80 | CA   | GLY | 7   | 13.136 | 0.105  | 17.757 | 1.00 |  |
| 71.47      |    |      | C   |     |        |        |        |      |  |
| ATOM       | 81 | C    | GLY | 7   | 14.016 | -1.134 | 17.839 | 1.00 |  |
| 41.04      |    |      | C   |     |        |        |        |      |  |
| ATOM       | 82 | O    | GLY | 7   | 13.522 | -2.252 | 17.976 | 1.00 |  |
| 44.54      |    |      | O   |     |        |        |        |      |  |
| ATOM       | 83 | HN   | GLY | 7   | 13.257 | 0.734  | 15.733 | 1.00 |  |
| 45.49      |    |      | H   |     |        |        |        |      |  |
| ATOM       | 84 | HA1  | GLY | 7   | 12.116 | -0.204 | 17.608 |      |  |
| 1.00103.52 |    |      |     | H   |        |        |        |      |  |
| ATOM       | 85 | HA2  | GLY | 7   | 13.207 | 0.654  | 18.686 |      |  |
| 1.00108.67 |    |      |     | H   |        |        |        |      |  |
| ATOM       | 86 | N    | ASP | 8   | 15.322 | -0.929 | 17.748 | 1.00 |  |
| 27.00      |    |      | N   |     |        |        |        |      |  |
| ATOM       | 87 | CA   | ASP | 8   | 16.264 | -2.040 | 17.806 | 1.00 |  |
| 14.15      |    |      | C   |     |        |        |        |      |  |
| ATOM       | 88 | C    | ASP | 8   | 16.148 | -2.771 | 19.137 | 1.00 |  |
| 9.37       |    |      | C   |     |        |        |        |      |  |
| ATOM       | 89 | O    | ASP | 8   | 16.020 | -3.995 | 19.177 | 1.00 |  |
| 14.61      |    |      | O   |     |        |        |        |      |  |
| ATOM       | 90 | CB   | ASP | 8   | 17.693 | -1.531 | 17.630 | 1.00 |  |
| 15.06      |    |      | C   |     |        |        |        |      |  |
| ATOM       | 91 | CG   | ASP | 8   | 18.642 | -2.708 | 17.430 | 1.00 |  |
| 21.22      |    |      | C   |     |        |        |        |      |  |
| ATOM       | 92 | OD1  | ASP | 8   | 19.811 | -2.563 | 17.749 |      |  |
| 1.00119.56 |    |      |     | O   |        |        |        |      |  |
| ATOM       | 93 | OD2  | ASP | 8   | 18.185 | -3.738 | 16.960 |      |  |
| 1.00133.27 |    |      |     | O1- |        |        |        |      |  |
| ATOM       | 94 | HN   | ASP | 8   | 15.657 | -0.016 | 17.634 | 1.00 |  |

|            |     |     |     |    |        |        |        |      |  |
|------------|-----|-----|-----|----|--------|--------|--------|------|--|
| 35.63      |     |     | H   |    |        |        |        |      |  |
| ATOM       | 95  | HA  | ASP | 8  | 16.039 | -2.729 | 17.012 | 1.00 |  |
| 20.92      |     |     | H   |    |        |        |        |      |  |
| ATOM       | 96  | HB1 | ASP | 8  | 17.989 | -0.980 | 18.509 | 1.00 |  |
| 29.39      |     |     | H   |    |        |        |        |      |  |
| ATOM       | 97  | HB2 | ASP | 8  | 17.736 | -0.881 | 16.768 | 1.00 |  |
| 44.14      |     |     | H   |    |        |        |        |      |  |
| ATOM       | 98  | N   | CYS | 9  | 16.189 | -2.012 | 20.222 | 1.00 |  |
| 5.93       |     |     | N   |    |        |        |        |      |  |
| ATOM       | 99  | CA  | CYS | 9  | 16.082 | -2.599 | 21.551 | 1.00 |  |
| 7.54       |     |     | C   |    |        |        |        |      |  |
| ATOM       | 100 | C   | CYS | 9  | 14.704 | -3.226 | 21.731 | 1.00 |  |
| 14.60      |     |     | C   |    |        |        |        |      |  |
| ATOM       | 101 | O   | CYS | 9  | 14.569 | -4.326 | 22.269 | 1.00 |  |
| 25.78      |     |     | O   |    |        |        |        |      |  |
| ATOM       | 102 | CB  | CYS | 9  | 16.314 | -1.532 | 22.612 | 1.00 |  |
| 6.63       |     |     | C   |    |        |        |        |      |  |
| ATOM       | 103 | SG  | CYS | 9  | 18.046 | -1.045 | 22.558 | 1.00 |  |
| 10.91      |     |     | S   |    |        |        |        |      |  |
| ATOM       | 104 | HN  | CYS | 9  | 16.289 | -1.044 | 20.125 | 1.00 |  |
| 6.51       |     |     | H   |    |        |        |        |      |  |
| ATOM       | 105 | HA  | CYS | 9  | 16.840 | -3.356 | 21.658 | 1.00 |  |
| 11.12      |     |     | H   |    |        |        |        |      |  |
| ATOM       | 106 | HB1 | CYS | 9  | 16.090 | -1.934 | 23.586 | 1.00 |  |
| 11.28      |     |     | H   |    |        |        |        |      |  |
| ATOM       | 107 | HB2 | CYS | 9  | 15.690 | -0.674 | 22.416 | 1.00 |  |
| 5.04       |     |     | H   |    |        |        |        |      |  |
| ATOM       | 108 | N   | ALA | 10 | 13.687 | -2.512 | 21.255 | 1.00 |  |
| 16.26      |     |     | N   |    |        |        |        |      |  |
| ATOM       | 109 | CA  | ALA | 10 | 12.304 | -2.980 | 21.334 | 1.00 |  |
| 32.04      |     |     | C   |    |        |        |        |      |  |
| ATOM       | 110 | C   | ALA | 10 | 11.382 | -2.011 | 20.598 | 1.00 |  |
| 45.47      |     |     | C   |    |        |        |        |      |  |
| ATOM       | 111 | O   | ALA | 10 | 11.784 | -0.900 | 20.254 |      |  |
| 1.00119.04 |     |     | O   |    |        |        |        |      |  |
| ATOM       | 112 | CB  | ALA | 10 | 11.856 | -3.109 | 22.791 | 1.00 |  |
| 30.10      |     |     | C   |    |        |        |        |      |  |
| ATOM       | 113 | HN  | ALA | 10 | 13.873 | -1.651 | 20.829 | 1.00 |  |
| 12.81      |     |     | H   |    |        |        |        |      |  |
| ATOM       | 114 | HA  | ALA | 10 | 12.238 | -3.950 | 20.863 | 1.00 |  |
| 47.14      |     |     | H   |    |        |        |        |      |  |
| ATOM       | 115 | HB1 | ALA | 10 | 11.693 | -2.126 | 23.206 | 1.00 |  |
| 84.37      |     |     | H   |    |        |        |        |      |  |
| ATOM       | 116 | HB2 | ALA | 10 | 12.616 | -3.620 | 23.361 |      |  |
| 1.00118.20 |     |     | H   |    |        |        |        |      |  |
| ATOM       | 117 | HB3 | ALA | 10 | 10.936 | -3.673 | 22.835 |      |  |
| 1.00117.32 |     |     | H   |    |        |        |        |      |  |
| ATOM       | 118 | N   | ALA | 11 | 10.148 | -2.440 | 20.356 | 1.00 |  |
| 30.62      |     |     | N   |    |        |        |        |      |  |
| ATOM       | 119 | CA  | ALA | 11 | 9.181  | -1.600 | 19.654 | 1.00 |  |
| 35.24      |     |     | C   |    |        |        |        |      |  |
| ATOM       | 120 | C   | ALA | 11 | 8.898  | -0.315 | 20.432 | 1.00 |  |

|            |     |     |     |     |        |        |        |      |
|------------|-----|-----|-----|-----|--------|--------|--------|------|
| 22.78      |     |     | C   |     |        |        |        |      |
| ATOM       | 121 | O   | ALA | 11  | 8.753  | 0.756  | 19.844 | 1.00 |
| 53.33      |     |     | O   |     |        |        |        |      |
| ATOM       | 122 | CB  | ALA | 11  | 7.876  | -2.371 | 19.454 | 1.00 |
| 60.49      |     |     | C   |     |        |        |        |      |
| ATOM       | 123 | HN  | ALA | 11  | 9.884  | -3.336 | 20.650 | 1.00 |
| 50.37      |     |     | H   |     |        |        |        |      |
| ATOM       | 124 | HA  | ALA | 11  | 9.583  | -1.341 | 18.687 | 1.00 |
| 41.70      |     |     | H   |     |        |        |        |      |
| ATOM       | 125 | HB1 | ALA | 11  | 7.280  | -1.879 | 18.700 |      |
| 1.00157.06 |     |     |     | H   |        |        |        |      |
| ATOM       | 126 | HB2 | ALA | 11  | 7.328  | -2.402 | 20.385 |      |
| 1.00148.83 |     |     |     | H   |        |        |        |      |
| ATOM       | 127 | HB3 | ALA | 11  | 8.099  | -3.379 | 19.134 |      |
| 1.00137.06 |     |     |     | H   |        |        |        |      |
| ATOM       | 128 | N   | ASP | 12  | 8.804  | -0.433 | 21.755 | 1.00 |
| 18.98      |     |     | N   |     |        |        |        |      |
| ATOM       | 129 | CA  | ASP | 12  | 8.520  | 0.723  | 22.610 | 1.00 |
| 31.05      |     |     | C   |     |        |        |        |      |
| ATOM       | 130 | C   | ASP | 12  | 9.807  | 1.380  | 23.106 | 1.00 |
| 22.98      |     |     | C   |     |        |        |        |      |
| ATOM       | 131 | O   | ASP | 12  | 9.779  | 2.197  | 24.026 | 1.00 |
| 37.14      |     |     | O   |     |        |        |        |      |
| ATOM       | 132 | CB  | ASP | 12  | 7.676  | 0.282  | 23.807 | 1.00 |
| 48.35      |     |     | C   |     |        |        |        |      |
| ATOM       | 133 | CG  | ASP | 12  | 8.433  | -0.753 | 24.630 |      |
| 1.00104.83 |     |     |     | C   |        |        |        |      |
| ATOM       | 134 | OD1 | ASP | 12  | 9.468  | -1.205 | 24.169 |      |
| 1.00258.73 |     |     |     | O   |        |        |        |      |
| ATOM       | 135 | OD2 | ASP | 12  | 7.969  | -1.081 | 25.710 |      |
| 1.00213.46 |     |     |     | O1- |        |        |        |      |
| ATOM       | 136 | HN  | ASP | 12  | 8.918  | -1.315 | 22.166 | 1.00 |
| 36.19      |     |     | H   |     |        |        |        |      |
| ATOM       | 137 | HA  | ASP | 12  | 7.955  | 1.451  | 22.043 | 1.00 |
| 49.76      |     |     | H   |     |        |        |        |      |
| ATOM       | 138 | HB1 | ASP | 12  | 6.751  | -0.150 | 23.455 | 1.00 |
| 95.71      |     |     | H   |     |        |        |        |      |
| ATOM       | 139 | HB2 | ASP | 12  | 7.456  | 1.140  | 24.426 | 1.00 |
| 54.37      |     |     | H   |     |        |        |        |      |
| ATOM       | 140 | N   | GLU | 13  | 10.935 | 1.020  | 22.494 | 1.00 |
| 17.60      |     |     | N   |     |        |        |        |      |
| ATOM       | 141 | CA  | GLU | 13  | 12.238 | 1.578  | 22.879 | 1.00 |
| 12.01      |     |     | C   |     |        |        |        |      |
| ATOM       | 142 | C   | GLU | 13  | 12.903 | 2.253  | 21.679 | 1.00 |
| 10.07      |     |     | C   |     |        |        |        |      |
| ATOM       | 143 | O   | GLU | 13  | 12.565 | 1.965  | 20.533 | 1.00 |
| 12.81      |     |     | O   |     |        |        |        |      |
| ATOM       | 144 | CB  | GLU | 13  | 13.130 | 0.458  | 23.415 | 1.00 |
| 11.74      |     |     | C   |     |        |        |        |      |
| ATOM       | 145 | CG  | GLU | 13  | 12.575 | -0.021 | 24.761 | 1.00 |
| 13.49      |     |     | C   |     |        |        |        |      |
| ATOM       | 146 | CD  | GLU | 13  | 13.220 | -1.342 | 25.160 |      |

|            |     |     |     |     |        |        |        |      |  |
|------------|-----|-----|-----|-----|--------|--------|--------|------|--|
| 1.00142.36 |     |     |     | C   |        |        |        |      |  |
| ATOM       | 147 | OE1 | GLU | 13  | 13.024 | -1.758 | 26.290 |      |  |
| 1.00339.06 |     |     |     | O   |        |        |        |      |  |
| ATOM       | 148 | OE2 | GLU | 13  | 13.897 | -1.920 | 24.330 |      |  |
| 1.00335.28 |     |     |     | O1- |        |        |        |      |  |
| ATOM       | 149 | HN  | GLU | 13  | 10.894 | 0.362  | 21.767 | 1.00 |  |
| 28.36      |     |     | H   |     |        |        |        |      |  |
| ATOM       | 150 | HA  | GLU | 13  | 12.102 | 2.314  | 23.659 | 1.00 |  |
| 13.06      |     |     | H   |     |        |        |        |      |  |
| ATOM       | 151 | HB1 | GLU | 13  | 14.134 | 0.830  | 23.554 | 1.00 |  |
| 13.76      |     |     | H   |     |        |        |        |      |  |
| ATOM       | 152 | HB2 | GLU | 13  | 13.142 | -0.363 | 22.712 | 1.00 |  |
| 9.94       |     |     | H   |     |        |        |        |      |  |
| ATOM       | 153 | HG1 | GLU | 13  | 11.506 | -0.157 | 24.679 | 1.00 |  |
| 66.02      |     |     | H   |     |        |        |        |      |  |
| ATOM       | 154 | HG2 | GLU | 13  | 12.783 | 0.722  | 25.516 | 1.00 |  |
| 56.23      |     |     | H   |     |        |        |        |      |  |
| ATOM       | 155 | N   | CYS | 14  | 13.843 | 3.162  | 21.952 | 1.00 |  |
| 9.12       |     |     | N   |     |        |        |        |      |  |
| ATOM       | 156 | CA  | CYS | 14  | 14.546 | 3.889  | 20.889 | 1.00 |  |
| 10.69      |     |     | C   |     |        |        |        |      |  |
| ATOM       | 157 | C   | CYS | 14  | 16.012 | 3.483  | 20.839 | 1.00 |  |
| 9.56       |     |     | C   |     |        |        |        |      |  |
| ATOM       | 158 | O   | CYS | 14  | 16.622 | 3.226  | 21.873 | 1.00 |  |
| 13.62      |     |     | O   |     |        |        |        |      |  |
| ATOM       | 159 | CB  | CYS | 14  | 14.454 | 5.395  | 21.140 | 1.00 |  |
| 13.96      |     |     | C   |     |        |        |        |      |  |
| ATOM       | 160 | SG  | CYS | 14  | 15.363 | 6.278  | 19.843 | 1.00 |  |
| 42.96      |     |     | S   |     |        |        |        |      |  |
| ATOM       | 161 | HN  | CYS | 14  | 14.068 | 3.355  | 22.888 | 1.00 |  |
| 9.76       |     |     | H   |     |        |        |        |      |  |
| ATOM       | 162 | HA  | CYS | 14  | 14.090 | 3.670  | 19.933 | 1.00 |  |
| 15.54      |     |     | H   |     |        |        |        |      |  |
| ATOM       | 163 | HB1 | CYS | 14  | 14.885 | 5.624  | 22.102 | 1.00 |  |
| 50.72      |     |     | H   |     |        |        |        |      |  |
| ATOM       | 164 | HB2 | CYS | 14  | 13.417 | 5.701  | 21.126 | 1.00 |  |
| 46.13      |     |     | H   |     |        |        |        |      |  |
| ATOM       | 165 | N   | CYS | 15  | 16.571 | 3.429  | 19.633 | 1.00 |  |
| 9.60       |     |     | N   |     |        |        |        |      |  |
| ATOM       | 166 | CA  | CYS | 15  | 17.974 | 3.059  | 19.449 | 1.00 |  |
| 9.28       |     |     | C   |     |        |        |        |      |  |
| ATOM       | 167 | C   | CYS | 15  | 18.600 | 3.952  | 18.388 | 1.00 |  |
| 9.92       |     |     | C   |     |        |        |        |      |  |
| ATOM       | 168 | O   | CYS | 15  | 18.052 | 4.109  | 17.298 | 1.00 |  |
| 13.31      |     |     | O   |     |        |        |        |      |  |
| ATOM       | 169 | CB  | CYS | 15  | 18.074 | 1.594  | 19.011 | 1.00 |  |
| 12.90      |     |     | C   |     |        |        |        |      |  |
| ATOM       | 170 | SG  | CYS | 15  | 19.806 | 1.054  | 19.040 | 1.00 |  |
| 39.11      |     |     | S   |     |        |        |        |      |  |
| ATOM       | 171 | HN  | CYS | 15  | 16.033 | 3.654  | 18.844 | 1.00 |  |
| 13.12      |     |     | H   |     |        |        |        |      |  |
| ATOM       | 172 | HA  | CYS | 15  | 18.511 | 3.186  | 20.379 | 1.00 |  |

|            |     |      |     |    |        |       |        |      |
|------------|-----|------|-----|----|--------|-------|--------|------|
| 8.26       |     |      | H   |    |        |       |        |      |
| ATOM       | 173 | HB1  | CYS | 15 | 17.681 | 1.492 | 18.010 | 1.00 |
| 24.82      |     |      | H   |    |        |       |        |      |
| ATOM       | 174 | HB2  | CYS | 15 | 17.496 | 0.980 | 19.686 | 1.00 |
| 27.31      |     |      | H   |    |        |       |        |      |
| ATOM       | 175 | N    | VAL | 16 | 19.745 | 4.547 | 18.713 | 1.00 |
| 9.56       |     |      | N   |    |        |       |        |      |
| ATOM       | 176 | CA   | VAL | 16 | 20.425 | 5.435 | 17.774 | 1.00 |
| 11.99      |     |      | C   |    |        |       |        |      |
| ATOM       | 177 | C    | VAL | 16 | 21.938 | 5.302 | 17.912 | 1.00 |
| 7.73       |     |      | C   |    |        |       |        |      |
| ATOM       | 178 | O    | VAL | 16 | 22.474 | 5.313 | 19.021 | 1.00 |
| 8.83       |     |      | O   |    |        |       |        |      |
| ATOM       | 179 | CB   | VAL | 16 | 19.997 | 6.880 | 18.044 | 1.00 |
| 18.37      |     |      | C   |    |        |       |        |      |
| ATOM       | 180 | CG1  | VAL | 16 | 20.588 | 7.358 | 19.373 | 1.00 |
| 39.61      |     |      | C   |    |        |       |        |      |
| ATOM       | 181 | CG2  | VAL | 16 | 20.490 | 7.774 | 16.908 |      |
| 1.00115.21 |     |      | C   |    |        |       |        |      |
| ATOM       | 182 | HN   | VAL | 16 | 20.134 | 4.392 | 19.599 | 1.00 |
| 9.76       |     |      | H   |    |        |       |        |      |
| ATOM       | 183 | HA   | VAL | 16 | 20.146 | 5.173 | 16.763 | 1.00 |
| 17.27      |     |      | H   |    |        |       |        |      |
| ATOM       | 184 | HB   | VAL | 16 | 18.920 | 6.927 | 18.096 | 1.00 |
| 52.63      |     |      | H   |    |        |       |        |      |
| ATOM       | 185 | HG11 | VAL | 16 | 20.103 | 8.276 | 19.671 |      |
| 1.00128.07 |     |      | H   |    |        |       |        |      |
| ATOM       | 186 | HG12 | VAL | 16 | 21.647 | 7.532 | 19.254 |      |
| 1.00154.13 |     |      | H   |    |        |       |        |      |
| ATOM       | 187 | HG13 | VAL | 16 | 20.429 | 6.604 | 20.130 |      |
| 1.00135.74 |     |      | H   |    |        |       |        |      |
| ATOM       | 188 | HG21 | VAL | 16 | 21.550 | 7.622 | 16.763 |      |
| 1.00229.05 |     |      | H   |    |        |       |        |      |
| ATOM       | 189 | HG22 | VAL | 16 | 20.303 | 8.806 | 17.156 |      |
| 1.00261.82 |     |      | H   |    |        |       |        |      |
| ATOM       | 190 | HG23 | VAL | 16 | 19.964 | 7.520 | 16.000 |      |
| 1.00210.07 |     |      | H   |    |        |       |        |      |
| ATOM       | 191 | N    | ASP | 17 | 22.623 | 5.168 | 16.776 | 1.00 |
| 14.34      |     |      | N   |    |        |       |        |      |
| ATOM       | 192 | CA   | ASP | 17 | 24.079 | 5.026 | 16.776 | 1.00 |
| 11.90      |     |      | C   |    |        |       |        |      |
| ATOM       | 193 | C    | ASP | 17 | 24.759 | 6.383 | 16.633 | 1.00 |
| 13.15      |     |      | C   |    |        |       |        |      |
| ATOM       | 194 | O    | ASP | 17 | 24.529 | 7.106 | 15.663 | 1.00 |
| 25.96      |     |      | O   |    |        |       |        |      |
| ATOM       | 195 | CB   | ASP | 17 | 24.512 | 4.126 | 15.617 | 1.00 |
| 20.80      |     |      | C   |    |        |       |        |      |
| ATOM       | 196 | CG   | ASP | 17 | 23.858 | 2.757 | 15.744 | 1.00 |
| 28.72      |     |      | C   |    |        |       |        |      |
| ATOM       | 197 | OD1  | ASP | 17 | 23.816 | 2.240 | 16.849 |      |
| 1.00135.42 |     |      | O   |    |        |       |        |      |
| ATOM       | 198 | OD2  | ASP | 17 | 23.410 | 2.243 | 14.733 |      |



|            |     |      |     |     |        |        |        |      |  |
|------------|-----|------|-----|-----|--------|--------|--------|------|--|
| 1.00114.17 |     |      |     | 01- |        |        |        |      |  |
| ATOM       | 199 | HN   | ASP | 17  | 22.139 | 5.160  | 15.925 | 1.00 |  |
| 28.29      |     |      | H   |     |        |        |        |      |  |
| ATOM       | 200 | HA   | ASP | 17  | 24.393 | 4.570  | 17.703 | 1.00 |  |
| 10.49      |     |      | H   |     |        |        |        |      |  |
| ATOM       | 201 | HB1  | ASP | 17  | 25.587 | 4.012  | 15.637 | 1.00 |  |
| 22.42      |     |      | H   |     |        |        |        |      |  |
| ATOM       | 202 | HB2  | ASP | 17  | 24.216 | 4.579  | 14.683 | 1.00 |  |
| 29.52      |     |      | H   |     |        |        |        |      |  |
| ATOM       | 203 | N    | THR | 18  | 25.618 | 6.710  | 17.596 | 1.00 |  |
| 11.55      |     |      | N   |     |        |        |        |      |  |
| ATOM       | 204 | CA   | THR | 18  | 26.360 | 7.973  | 17.573 | 1.00 |  |
| 17.10      |     |      | C   |     |        |        |        |      |  |
| ATOM       | 205 | C    | THR | 18  | 27.781 | 7.724  | 17.084 | 1.00 |  |
| 10.63      |     |      | C   |     |        |        |        |      |  |
| ATOM       | 206 | O    | THR | 18  | 28.287 | 6.606  | 17.169 | 1.00 |  |
| 6.49       |     |      | O   |     |        |        |        |      |  |
| ATOM       | 207 | CB   | THR | 18  | 26.398 | 8.588  | 18.989 | 1.00 |  |
| 28.52      |     |      | C   |     |        |        |        |      |  |
| ATOM       | 208 | CG2  | THR | 18  | 25.195 | 9.513  | 19.205 | 1.00 |  |
| 45.38      |     |      | C   |     |        |        |        |      |  |
| ATOM       | 209 | OG1  | THR | 18  | 26.370 | 7.546  | 19.950 | 1.00 |  |
| 26.49      |     |      | O   |     |        |        |        |      |  |
| ATOM       | 210 | HN   | THR | 18  | 25.768 | 6.084  | 18.335 | 1.00 |  |
| 13.96      |     |      | H   |     |        |        |        |      |  |
| ATOM       | 211 | HA   | THR | 18  | 25.876 | 8.666  | 16.896 | 1.00 |  |
| 26.43      |     |      | H   |     |        |        |        |      |  |
| ATOM       | 212 | HB   | THR | 18  | 27.305 | 9.163  | 19.116 | 1.00 |  |
| 37.43      |     |      | H   |     |        |        |        |      |  |
| ATOM       | 213 | HG1  | THR | 18  | 25.549 | 7.060  | 19.838 | 1.00 |  |
| 71.62      |     |      | H   |     |        |        |        |      |  |
| ATOM       | 214 | HG21 | THR | 18  | 24.317 | 9.080  | 18.751 |      |  |
| 1.00100.44 |     |      |     | H   |        |        |        |      |  |
| ATOM       | 215 | HG22 | THR | 18  | 25.399 | 10.474 | 18.755 |      |  |
| 1.00129.42 |     |      |     | H   |        |        |        |      |  |
| ATOM       | 216 | HG23 | THR | 18  | 25.029 | 9.643  | 20.263 |      |  |
| 1.00156.21 |     |      |     | H   |        |        |        |      |  |
| ATOM       | 217 | N    | VAL | 19  | 28.420 | 8.780  | 16.596 | 1.00 |  |
| 16.32      |     |      | N   |     |        |        |        |      |  |
| ATOM       | 218 | CA   | VAL | 19  | 29.780 | 8.699  | 16.117 | 1.00 |  |
| 13.34      |     |      | C   |     |        |        |        |      |  |
| ATOM       | 219 | C    | VAL | 19  | 30.222 | 10.058 | 15.610 | 1.00 |  |
| 25.88      |     |      | C   |     |        |        |        |      |  |
| ATOM       | 220 | O    | VAL | 19  | 29.673 | 10.608 | 14.654 | 1.00 |  |
| 42.11      |     |      | O   |     |        |        |        |      |  |
| ATOM       | 221 | CB   | VAL | 19  | 29.940 | 7.658  | 15.009 | 1.00 |  |
| 15.48      |     |      | C   |     |        |        |        |      |  |
| ATOM       | 222 | CG1  | VAL | 19  | 28.925 | 7.917  | 13.892 | 1.00 |  |
| 29.06      |     |      | C   |     |        |        |        |      |  |
| ATOM       | 223 | CG2  | VAL | 19  | 31.367 | 7.756  | 14.447 | 1.00 |  |
| 20.67      |     |      | C   |     |        |        |        |      |  |
| ATOM       | 224 | HN   | VAL | 19  | 27.977 | 9.648  | 16.580 | 1.00 |  |

|            |     |      |     |    |        |        |        |      |   |
|------------|-----|------|-----|----|--------|--------|--------|------|---|
| 26.89      |     |      | H   |    |        |        |        |      |   |
| ATOM       | 225 | HA   | VAL | 19 | 30.418 | 8.418  | 16.945 | 1.00 |   |
| 8.08       |     |      | H   |    |        |        |        |      |   |
| ATOM       | 226 | HB   | VAL | 19 | 29.784 | 6.672  | 15.419 | 1.00 |   |
| 11.49      |     |      | H   |    |        |        |        |      |   |
| ATOM       | 227 | HG11 | VAL | 19 | 29.257 | 8.747  | 13.284 |      |   |
| 1.00137.43 |     |      |     |    |        |        |        |      | H |
| ATOM       | 228 | HG12 | VAL | 19 | 27.962 | 8.150  | 14.323 | 1.00 |   |
| 93.29      |     |      | H   |    |        |        |        |      |   |
| ATOM       | 229 | HG13 | VAL | 19 | 28.837 | 7.034  | 13.275 |      |   |
| 1.00108.69 |     |      |     |    |        |        |        |      | H |
| ATOM       | 230 | HG21 | VAL | 19 | 31.445 | 8.631  | 13.817 | 1.00 |   |
| 99.42      |     |      | H   |    |        |        |        |      |   |
| ATOM       | 231 | HG22 | VAL | 19 | 31.591 | 6.876  | 13.867 |      |   |
| 1.00111.36 |     |      |     |    |        |        |        |      | H |
| ATOM       | 232 | HG23 | VAL | 19 | 32.071 | 7.843  | 15.265 | 1.00 |   |
| 77.11      |     |      | H   |    |        |        |        |      |   |
| ATOM       | 233 | N    | PHE | 20 | 31.216 | 10.574 | 16.278 | 1.00 |   |
| 24.58      |     |      | N   |    |        |        |        |      |   |
| ATOM       | 234 | CA   | PHE | 20 | 31.785 | 11.869 | 15.957 | 1.00 |   |
| 40.34      |     |      | C   |    |        |        |        |      |   |
| ATOM       | 235 | C    | PHE | 20 | 32.628 | 11.801 | 14.680 | 1.00 |   |
| 40.37      |     |      | C   |    |        |        |        |      |   |
| ATOM       | 236 | O    | PHE | 20 | 32.120 | 11.980 | 13.574 | 1.00 |   |
| 66.02      |     |      | O   |    |        |        |        |      |   |
| ATOM       | 237 | CB   | PHE | 20 | 32.646 | 12.357 | 17.151 | 1.00 |   |
| 48.79      |     |      | C   |    |        |        |        |      |   |
| ATOM       | 238 | CG   | PHE | 20 | 32.962 | 11.196 | 18.075 | 1.00 |   |
| 35.75      |     |      | C   |    |        |        |        |      |   |
| ATOM       | 239 | CD1  | PHE | 20 | 31.964 | 10.683 | 18.919 | 1.00 |   |
| 30.20      |     |      | C   |    |        |        |        |      |   |
| ATOM       | 240 | CD2  | PHE | 20 | 34.248 | 10.641 | 18.096 | 1.00 |   |
| 40.95      |     |      | C   |    |        |        |        |      |   |
| ATOM       | 241 | CE1  | PHE | 20 | 32.255 | 9.621  | 19.777 | 1.00 |   |
| 30.41      |     |      | C   |    |        |        |        |      |   |
| ATOM       | 242 | CE2  | PHE | 20 | 34.535 | 9.574  | 18.958 | 1.00 |   |
| 45.84      |     |      | C   |    |        |        |        |      |   |
| ATOM       | 243 | CZ   | PHE | 20 | 33.539 | 9.067  | 19.799 | 1.00 |   |
| 40.81      |     |      | C   |    |        |        |        |      |   |
| ATOM       | 244 | HN   | PHE | 20 | 31.574 | 10.066 | 17.026 | 1.00 |   |
| 16.73      |     |      | H   |    |        |        |        |      |   |
| ATOM       | 245 | HA   | PHE | 20 | 30.978 | 12.571 | 15.796 | 1.00 |   |
| 59.91      |     |      | H   |    |        |        |        |      |   |
| ATOM       | 246 | HB1  | PHE | 20 | 32.098 | 13.091 | 17.700 | 1.00 |   |
| 67.15      |     |      | H   |    |        |        |        |      |   |
| ATOM       | 247 | HB2  | PHE | 20 | 33.567 | 12.801 | 16.805 | 1.00 |   |
| 58.17      |     |      | H   |    |        |        |        |      |   |
| ATOM       | 248 | HD1  | PHE | 20 | 30.966 | 11.104 | 18.903 | 1.00 |   |
| 33.34      |     |      | H   |    |        |        |        |      |   |
| ATOM       | 249 | HD2  | PHE | 20 | 35.014 | 11.028 | 17.445 | 1.00 |   |
| 49.35      |     |      | H   |    |        |        |        |      |   |
| ATOM       | 250 | HE1  | PHE | 20 | 31.487 | 9.225  | 20.422 | 1.00 |   |

|            |     |     |     |     |        |        |        |      |  |
|------------|-----|-----|-----|-----|--------|--------|--------|------|--|
| 30.61      |     |     | H   |     |        |        |        |      |  |
| ATOM       | 251 | HE2 | PHE | 20  | 35.526 | 9.146  | 18.974 | 1.00 |  |
| 61.27      |     |     | H   |     |        |        |        |      |  |
| ATOM       | 252 | HZ  | PHE | 20  | 33.761 | 8.245  | 20.463 | 1.00 |  |
| 52.66      |     |     | H   |     |        |        |        |      |  |
| ATOM       | 253 | N   | GLU | 21  | 33.922 | 11.566 | 14.857 | 1.00 |  |
| 41.31      |     |     | N   |     |        |        |        |      |  |
| ATOM       | 254 | CA  | GLU | 21  | 34.857 | 11.501 | 13.740 | 1.00 |  |
| 56.16      |     |     | C   |     |        |        |        |      |  |
| ATOM       | 255 | C   | GLU | 21  | 34.973 | 10.074 | 13.207 | 1.00 |  |
| 58.61      |     |     | C   |     |        |        |        |      |  |
| ATOM       | 256 | O   | GLU | 21  | 34.595 | 9.794  | 12.070 |      |  |
| 1.00201.19 |     |     |     | O   |        |        |        |      |  |
| ATOM       | 257 | CB  | GLU | 21  | 36.217 | 12.034 | 14.230 | 1.00 |  |
| 57.37      |     |     | C   |     |        |        |        |      |  |
| ATOM       | 258 | CG  | GLU | 21  | 37.374 | 11.488 | 13.380 |      |  |
| 1.00193.56 |     |     |     | C   |        |        |        |      |  |
| ATOM       | 259 | CD  | GLU | 21  | 38.659 | 12.244 | 13.700 |      |  |
| 1.00304.62 |     |     |     | C   |        |        |        |      |  |
| ATOM       | 260 | OE1 | GLU | 21  | 39.491 | 11.689 | 14.399 |      |  |
| 1.00451.81 |     |     |     | O   |        |        |        |      |  |
| ATOM       | 261 | OE2 | GLU | 21  | 38.790 | 13.366 | 13.243 |      |  |
| 1.00442.88 |     |     |     | O1- |        |        |        |      |  |
| ATOM       | 262 | HN  | GLU | 21  | 34.264 | 11.451 | 15.768 | 1.00 |  |
| 50.82      |     |     | H   |     |        |        |        |      |  |
| ATOM       | 263 | HA  | GLU | 21  | 34.505 | 12.135 | 12.945 | 1.00 |  |
| 85.72      |     |     | H   |     |        |        |        |      |  |
| ATOM       | 264 | HB1 | GLU | 21  | 36.353 | 11.741 | 15.263 | 1.00 |  |
| 46.37      |     |     | H   |     |        |        |        |      |  |
| ATOM       | 265 | HB2 | GLU | 21  | 36.217 | 13.115 | 14.171 |      |  |
| 1.00131.81 |     |     |     | H   |        |        |        |      |  |
| ATOM       | 266 | HG1 | GLU | 21  | 37.137 | 11.608 | 12.334 |      |  |
| 1.00314.91 |     |     |     | H   |        |        |        |      |  |
| ATOM       | 267 | HG2 | GLU | 21  | 37.514 | 10.438 | 13.598 |      |  |
| 1.00266.92 |     |     |     | H   |        |        |        |      |  |
| ATOM       | 268 | N   | GLY | 22  | 35.499 | 9.183  | 14.032 | 1.00 |  |
| 86.70      |     |     | N   |     |        |        |        |      |  |
| ATOM       | 269 | CA  | GLY | 22  | 35.659 | 7.790  | 13.625 |      |  |
| 1.00104.66 |     |     |     | C   |        |        |        |      |  |
| ATOM       | 270 | C   | GLY | 22  | 36.661 | 7.062  | 14.517 | 1.00 |  |
| 71.50      |     |     | C   |     |        |        |        |      |  |
| ATOM       | 271 | O   | GLY | 22  | 36.778 | 5.837  | 14.458 | 1.00 |  |
| 89.87      |     |     | O   |     |        |        |        |      |  |
| ATOM       | 272 | HN  | GLY | 22  | 35.784 | 9.465  | 14.923 |      |  |
| 1.00214.64 |     |     |     | H   |        |        |        |      |  |
| ATOM       | 273 | HA1 | GLY | 22  | 36.010 | 7.756  | 12.605 |      |  |
| 1.00152.47 |     |     |     | H   |        |        |        |      |  |
| ATOM       | 274 | HA2 | GLY | 22  | 34.704 | 7.291  | 13.689 |      |  |
| 1.00118.15 |     |     |     | H   |        |        |        |      |  |
| ATOM       | 275 | N   | ASP | 23  | 37.376 | 7.814  | 15.348 | 1.00 |  |
| 44.68      |     |     | N   |     |        |        |        |      |  |
| ATOM       | 276 | CA  | ASP | 23  | 38.352 | 7.208  | 16.246 | 1.00 |  |

|            |     |     |     |    |        |       |        |      |  |
|------------|-----|-----|-----|----|--------|-------|--------|------|--|
| 43.33      |     |     | C   |    |        |       |        |      |  |
| ATOM       | 277 | C   | ASP | 23 | 37.652 | 6.214 | 17.164 | 1.00 |  |
| 37.55      |     |     | C   |    |        |       |        |      |  |
| ATOM       | 278 | O   | ASP | 23 | 38.150 | 5.117 | 17.413 | 1.00 |  |
| 61.37      |     |     | O   |    |        |       |        |      |  |
| ATOM       | 279 | CB  | ASP | 23 | 39.039 | 8.288 | 17.084 | 1.00 |  |
| 40.74      |     |     | C   |    |        |       |        |      |  |
| ATOM       | 280 | CG  | ASP | 23 | 40.123 | 7.662 | 17.954 |      |  |
| 1.00141.86 |     |     | C   |    |        |       |        |      |  |
| ATOM       | 281 | OD1 | ASP | 23 | 40.859 | 8.409 | 18.578 |      |  |
| 1.00328.18 |     |     | O   |    |        |       |        |      |  |
| ATOM       | 282 | OD2 | ASP | 23 | 40.201 | 6.445 | 17.985 |      |  |
| 1.00304.58 |     |     | O1- |    |        |       |        |      |  |
| ATOM       | 283 | HN  | ASP | 23 | 37.241 | 8.784 | 15.362 | 1.00 |  |
| 40.86      |     |     | H   |    |        |       |        |      |  |
| ATOM       | 284 | HA  | ASP | 23 | 39.095 | 6.687 | 15.663 | 1.00 |  |
| 72.12      |     |     | H   |    |        |       |        |      |  |
| ATOM       | 285 | HB1 | ASP | 23 | 38.309 | 8.772 | 17.716 | 1.00 |  |
| 94.15      |     |     | H   |    |        |       |        |      |  |
| ATOM       | 286 | HB2 | ASP | 23 | 39.486 | 9.021 | 16.427 | 1.00 |  |
| 93.26      |     |     | H   |    |        |       |        |      |  |
| ATOM       | 287 | N   | MET | 24 | 36.482 | 6.614 | 17.647 | 1.00 |  |
| 23.24      |     |     | N   |    |        |       |        |      |  |
| ATOM       | 288 | CA  | MET | 24 | 35.679 | 5.770 | 18.526 | 1.00 |  |
| 32.50      |     |     | C   |    |        |       |        |      |  |
| ATOM       | 289 | C   | MET | 24 | 34.206 | 6.029 | 18.267 | 1.00 |  |
| 25.13      |     |     | C   |    |        |       |        |      |  |
| ATOM       | 290 | O   | MET | 24 | 33.795 | 7.165 | 18.037 | 1.00 |  |
| 54.40      |     |     | O   |    |        |       |        |      |  |
| ATOM       | 291 | CB  | MET | 24 | 36.014 | 6.058 | 19.992 | 1.00 |  |
| 47.36      |     |     | C   |    |        |       |        |      |  |
| ATOM       | 292 | CG  | MET | 24 | 35.186 | 5.141 | 20.893 |      |  |
| 1.00151.73 |     |     | C   |    |        |       |        |      |  |
| ATOM       | 293 | SD  | MET | 24 | 35.731 | 5.322 | 22.612 |      |  |
| 1.00209.23 |     |     | S   |    |        |       |        |      |  |
| ATOM       | 294 | CE  | MET | 24 | 35.068 | 6.980 | 22.906 |      |  |
| 1.00243.29 |     |     | C   |    |        |       |        |      |  |
| ATOM       | 295 | HN  | MET | 24 | 36.143 | 7.498 | 17.394 | 1.00 |  |
| 17.32      |     |     | H   |    |        |       |        |      |  |
| ATOM       | 296 | HA  | MET | 24 | 35.882 | 4.730 | 18.314 | 1.00 |  |
| 48.94      |     |     | H   |    |        |       |        |      |  |
| ATOM       | 297 | HB1 | MET | 24 | 35.784 | 7.088 | 20.218 |      |  |
| 1.00124.40 |     |     | H   |    |        |       |        |      |  |
| ATOM       | 298 | HB2 | MET | 24 | 37.067 | 5.879 | 20.162 |      |  |
| 1.00166.96 |     |     | H   |    |        |       |        |      |  |
| ATOM       | 299 | HG1 | MET | 24 | 35.319 | 4.115 | 20.581 |      |  |
| 1.00331.71 |     |     | H   |    |        |       |        |      |  |
| ATOM       | 300 | HG2 | MET | 24 | 34.142 | 5.407 | 20.816 |      |  |
| 1.00302.30 |     |     | H   |    |        |       |        |      |  |
| ATOM       | 301 | HE1 | MET | 24 | 35.730 | 7.716 | 22.471 |      |  |
| 1.00340.44 |     |     | H   |    |        |       |        |      |  |
| ATOM       | 302 | HE2 | MET | 24 | 34.990 | 7.155 | 23.968 |      |  |

|            |     |      |     |   |    |        |       |        |      |
|------------|-----|------|-----|---|----|--------|-------|--------|------|
| 1.00373.88 |     |      |     | H |    |        |       |        |      |
| ATOM       | 303 | HE3  | MET |   | 24 | 34.087 | 7.062 | 22.460 |      |
| 1.00386.81 |     |      |     | H |    |        |       |        |      |
| ATOM       | 304 | N    | VAL |   | 25 | 33.418 | 4.963 | 18.277 | 1.00 |
| 22.44      |     |      | N   |   |    |        |       |        |      |
| ATOM       | 305 | CA   | VAL |   | 25 | 31.992 | 5.067 | 18.017 | 1.00 |
| 15.37      |     |      | C   |   |    |        |       |        |      |
| ATOM       | 306 | C    | VAL |   | 25 | 31.194 | 5.005 | 19.314 | 1.00 |
| 17.47      |     |      | C   |   |    |        |       |        |      |
| ATOM       | 307 | O    | VAL |   | 25 | 31.679 | 4.521 | 20.336 | 1.00 |
| 29.52      |     |      | O   |   |    |        |       |        |      |
| ATOM       | 308 | CB   | VAL |   | 25 | 31.585 | 3.931 | 17.087 | 1.00 |
| 23.36      |     |      | C   |   |    |        |       |        |      |
| ATOM       | 309 | CG1  | VAL |   | 25 | 32.058 | 4.246 | 15.665 | 1.00 |
| 58.39      |     |      | C   |   |    |        |       |        |      |
| ATOM       | 310 | CG2  | VAL |   | 25 | 32.230 | 2.628 | 17.563 | 1.00 |
| 55.25      |     |      | C   |   |    |        |       |        |      |
| ATOM       | 311 | HN   | VAL |   | 25 | 33.805 | 4.081 | 18.444 | 1.00 |
| 48.11      |     |      | H   |   |    |        |       |        |      |
| ATOM       | 312 | HA   | VAL |   | 25 | 31.779 | 6.009 | 17.528 | 1.00 |
| 9.25       |     |      | H   |   |    |        |       |        |      |
| ATOM       | 313 | HB   | VAL |   | 25 | 30.521 | 3.829 | 17.097 | 1.00 |
| 52.45      |     |      | H   |   |    |        |       |        |      |
| ATOM       | 314 | HG11 | VAL |   | 25 | 32.025 | 3.349 | 15.065 |      |
| 1.00171.07 |     |      |     | H |    |        |       |        |      |
| ATOM       | 315 | HG12 | VAL |   | 25 | 33.071 | 4.623 | 15.695 |      |
| 1.00166.22 |     |      |     | H |    |        |       |        |      |
| ATOM       | 316 | HG13 | VAL |   | 25 | 31.412 | 4.994 | 15.231 |      |
| 1.00134.76 |     |      |     | H |    |        |       |        |      |
| ATOM       | 317 | HG21 | VAL |   | 25 | 33.286 | 2.644 | 17.333 |      |
| 1.00141.88 |     |      |     | H |    |        |       |        |      |
| ATOM       | 318 | HG22 | VAL |   | 25 | 31.765 | 1.792 | 17.060 |      |
| 1.00184.50 |     |      |     | H |    |        |       |        |      |
| ATOM       | 319 | HG23 | VAL |   | 25 | 32.095 | 2.528 | 18.630 |      |
| 1.00133.90 |     |      |     | H |    |        |       |        |      |
| ATOM       | 320 | N    | THR |   | 26 | 29.971 | 5.526 | 19.262 | 1.00 |
| 13.60      |     |      | N   |   |    |        |       |        |      |
| ATOM       | 321 | CA   | THR |   | 26 | 29.096 | 5.567 | 20.430 | 1.00 |
| 21.19      |     |      | C   |   |    |        |       |        |      |
| ATOM       | 322 | C    | THR |   | 26 | 27.670 | 5.166 | 20.054 | 1.00 |
| 16.55      |     |      | C   |   |    |        |       |        |      |
| ATOM       | 323 | O    | THR |   | 26 | 27.202 | 5.461 | 18.955 | 1.00 |
| 11.43      |     |      | O   |   |    |        |       |        |      |
| ATOM       | 324 | CB   | THR |   | 26 | 29.100 | 6.983 | 20.999 | 1.00 |
| 27.07      |     |      | C   |   |    |        |       |        |      |
| ATOM       | 325 | CG2  | THR |   | 26 | 28.231 | 7.048 | 22.258 | 1.00 |
| 44.39      |     |      | C   |   |    |        |       |        |      |
| ATOM       | 326 | OG1  | THR |   | 26 | 30.432 | 7.346 | 21.330 | 1.00 |
| 34.75      |     |      | O   |   |    |        |       |        |      |
| ATOM       | 327 | HN   | THR |   | 26 | 29.654 | 5.912 | 18.417 | 1.00 |
| 10.81      |     |      | H   |   |    |        |       |        |      |
| ATOM       | 328 | HA   | THR |   | 26 | 29.462 | 4.885 | 21.185 | 1.00 |

|            |     |      |     |    |        |        |        |      |  |
|------------|-----|------|-----|----|--------|--------|--------|------|--|
| 33.16      |     |      | H   |    |        |        |        |      |  |
| ATOM       | 329 | HB   | THR | 26 | 28.712 | 7.668  | 20.257 | 1.00 |  |
| 20.60      |     |      | H   |    |        |        |        |      |  |
| ATOM       | 330 | HG1  | THR | 26 | 30.411 | 8.213  | 21.741 | 1.00 |  |
| 77.72      |     |      | H   |    |        |        |        |      |  |
| ATOM       | 331 | HG21 | THR | 26 | 28.285 | 8.043  | 22.677 |      |  |
| 1.00126.99 |     |      | H   |    |        |        |        |      |  |
| ATOM       | 332 | HG22 | THR | 26 | 28.596 | 6.333  | 22.982 |      |  |
| 1.00108.32 |     |      | H   |    |        |        |        |      |  |
| ATOM       | 333 | HG23 | THR | 26 | 27.209 | 6.817  | 22.008 |      |  |
| 1.00151.99 |     |      | H   |    |        |        |        |      |  |
| ATOM       | 334 | N    | ARG | 27 | 26.985 | 4.494  | 20.980 | 1.00 |  |
| 22.38      |     |      | N   |    |        |        |        |      |  |
| ATOM       | 335 | CA   | ARG | 27 | 25.605 | 4.053  | 20.751 | 1.00 |  |
| 20.21      |     |      | C   |    |        |        |        |      |  |
| ATOM       | 336 | C    | ARG | 27 | 24.748 | 4.355  | 21.975 | 1.00 |  |
| 16.96      |     |      | C   |    |        |        |        |      |  |
| ATOM       | 337 | O    | ARG | 27 | 25.268 | 4.565  | 23.072 | 1.00 |  |
| 20.06      |     |      | O   |    |        |        |        |      |  |
| ATOM       | 338 | CB   | ARG | 27 | 25.580 | 2.549  | 20.465 | 1.00 |  |
| 22.14      |     |      | C   |    |        |        |        |      |  |
| ATOM       | 339 | CG   | ARG | 27 | 26.051 | 1.783  | 21.704 |      |  |
| 1.00124.30 |     |      | C   |    |        |        |        |      |  |
| ATOM       | 340 | CD   | ARG | 27 | 26.267 | 0.312  | 21.343 |      |  |
| 1.00109.38 |     |      | C   |    |        |        |        |      |  |
| ATOM       | 341 | NE   | ARG | 27 | 25.011 | -0.289 | 20.903 |      |  |
| 1.00227.73 |     |      | N   |    |        |        |        |      |  |
| ATOM       | 342 | CZ   | ARG | 27 | 24.149 | -0.804 | 21.776 |      |  |
| 1.00426.12 |     |      | C   |    |        |        |        |      |  |
| ATOM       | 343 | NH1  | ARG | 27 | 23.035 | -1.340 | 21.354 |      |  |
| 1.00767.09 |     |      | N1+ |    |        |        |        |      |  |
| ATOM       | 344 | NH2  | ARG | 27 | 24.415 | -0.774 | 23.053 |      |  |
| 1.00581.78 |     |      | N   |    |        |        |        |      |  |
| ATOM       | 345 | HN   | ARG | 27 | 27.414 | 4.291  | 21.837 | 1.00 |  |
| 30.75      |     |      | H   |    |        |        |        |      |  |
| ATOM       | 346 | HA   | ARG | 27 | 25.195 | 4.577  | 19.900 | 1.00 |  |
| 23.13      |     |      | H   |    |        |        |        |      |  |
| ATOM       | 347 | HB1  | ARG | 27 | 26.237 | 2.328  | 19.637 | 1.00 |  |
| 87.46      |     |      | H   |    |        |        |        |      |  |
| ATOM       | 348 | HB2  | ARG | 27 | 24.572 | 2.248  | 20.216 |      |  |
| 1.00103.36 |     |      | H   |    |        |        |        |      |  |
| ATOM       | 349 | HG1  | ARG | 27 | 25.302 | 1.855  | 22.478 |      |  |
| 1.00281.97 |     |      | H   |    |        |        |        |      |  |
| ATOM       | 350 | HG2  | ARG | 27 | 26.979 | 2.208  | 22.058 |      |  |
| 1.00276.19 |     |      | H   |    |        |        |        |      |  |
| ATOM       | 351 | HD1  | ARG | 27 | 26.640 | -0.217 | 22.208 |      |  |
| 1.00183.60 |     |      | H   |    |        |        |        |      |  |
| ATOM       | 352 | HD2  | ARG | 27 | 26.990 | 0.245  | 20.544 |      |  |
| 1.00142.93 |     |      | H   |    |        |        |        |      |  |
| ATOM       | 353 | HE   | ARG | 27 | 24.799 | -0.315 | 19.947 |      |  |
| 1.00372.53 |     |      | H   |    |        |        |        |      |  |
| ATOM       | 354 | HH11 | ARG | 27 | 22.831 | -1.361 | 20.376 |      |  |

|            |     |      |     |   |    |        |        |        |      |
|------------|-----|------|-----|---|----|--------|--------|--------|------|
| 1.00910.59 |     |      |     | H |    |        |        |        |      |
| ATOM       | 355 | HH12 | ARG |   | 27 | 22.388 | -1.728 | 22.008 |      |
| 1.00999.99 |     |      |     | H |    |        |        |        |      |
| ATOM       | 356 | HH21 | ARG |   | 27 | 25.266 | -0.363 | 23.376 |      |
| 1.00532.54 |     |      |     | H |    |        |        |        |      |
| ATOM       | 357 | HH22 | ARG |   | 27 | 23.767 | -1.163 | 23.708 |      |
| 1.00948.84 |     |      |     | H |    |        |        |        |      |
| ATOM       | 358 | N    | SER |   | 28 | 23.429 | 4.387  | 21.784 | 1.00 |
| 14.60      |     |      | N   |   |    |        |        |        |      |
| ATOM       | 359 | CA   | SER |   | 28 | 22.508 | 4.678  | 22.882 | 1.00 |
| 14.92      |     |      | C   |   |    |        |        |        |      |
| ATOM       | 360 | C    | SER |   | 28 | 21.183 | 3.947  | 22.687 | 1.00 |
| 12.12      |     |      | C   |   |    |        |        |        |      |
| ATOM       | 361 | O    | SER |   | 28 | 20.764 | 3.687  | 21.560 | 1.00 |
| 13.41      |     |      | O   |   |    |        |        |        |      |
| ATOM       | 362 | CB   | SER |   | 28 | 22.252 | 6.183  | 22.963 | 1.00 |
| 23.26      |     |      | C   |   |    |        |        |        |      |
| ATOM       | 363 | OG   | SER |   | 28 | 21.363 | 6.450  | 24.039 |      |
| 1.00146.32 |     |      |     | O |    |        |        |        |      |
| ATOM       | 364 | HN   | SER |   | 28 | 23.068 | 4.220  | 20.887 | 1.00 |
| 15.23      |     |      | H   |   |    |        |        |        |      |
| ATOM       | 365 | HA   | SER |   | 28 | 22.949 | 4.350  | 23.814 | 1.00 |
| 15.44      |     |      | H   |   |    |        |        |        |      |
| ATOM       | 366 | HB1  | SER |   | 28 | 21.820 | 6.523  | 22.032 | 1.00 |
| 88.73      |     |      | H   |   |    |        |        |        |      |
| ATOM       | 367 | HB2  | SER |   | 28 | 23.183 | 6.698  | 23.134 |      |
| 1.00124.68 |     |      |     | H |    |        |        |        |      |
| ATOM       | 368 | HG   | SER |   | 28 | 20.478 | 6.205  | 23.760 |      |
| 1.00242.47 |     |      |     | H |    |        |        |        |      |
| ATOM       | 369 | N    | CYS |   | 29 | 20.528 | 3.622  | 23.797 | 1.00 |
| 10.48      |     |      | N   |   |    |        |        |        |      |
| ATOM       | 370 | CA   | CYS |   | 29 | 19.249 | 2.925  | 23.749 | 1.00 |
| 9.97       |     |      | C   |   |    |        |        |        |      |
| ATOM       | 371 | C    | CYS |   | 29 | 18.627 | 2.894  | 25.144 | 1.00 |
| 11.60      |     |      | C   |   |    |        |        |        |      |
| ATOM       | 372 | O    | CYS |   | 29 | 19.287 | 2.525  | 26.116 | 1.00 |
| 15.64      |     |      | O   |   |    |        |        |        |      |
| ATOM       | 373 | CB   | CYS |   | 29 | 19.450 | 1.497  | 23.216 | 1.00 |
| 9.52       |     |      | C   |   |    |        |        |        |      |
| ATOM       | 374 | SG   | CYS |   | 29 | 17.969 | 0.955  | 22.350 | 1.00 |
| 10.40      |     |      | S   |   |    |        |        |        |      |
| ATOM       | 375 | HN   | CYS |   | 29 | 20.908 | 3.863  | 24.667 | 1.00 |
| 11.10      |     |      | H   |   |    |        |        |        |      |
| ATOM       | 376 | HA   | CYS |   | 29 | 18.586 | 3.459  | 23.085 | 1.00 |
| 11.08      |     |      | H   |   |    |        |        |        |      |
| ATOM       | 377 | HB1  | CYS |   | 29 | 19.643 | 0.814  | 24.033 | 1.00 |
| 9.33       |     |      | H   |   |    |        |        |        |      |
| ATOM       | 378 | HB2  | CYS |   | 29 | 20.283 | 1.477  | 22.532 | 1.00 |
| 10.78      |     |      | H   |   |    |        |        |        |      |
| ATOM       | 379 | N    | GLU |   | 30 | 17.358 | 3.290  | 25.241 | 1.00 |
| 13.52      |     |      | N   |   |    |        |        |        |      |
| ATOM       | 380 | CA   | GLU |   | 30 | 16.660 | 3.311  | 26.531 | 1.00 |

|            |     |     |     |     |        |        |        |      |  |
|------------|-----|-----|-----|-----|--------|--------|--------|------|--|
| 17.41      |     |     | C   |     |        |        |        |      |  |
| ATOM       | 381 | C   | GLU | 30  | 15.644 | 2.181  | 26.615 | 1.00 |  |
| 10.81      |     |     | C   |     |        |        |        |      |  |
| ATOM       | 382 | O   | GLU | 30  | 14.932 | 1.898  | 25.651 | 1.00 |  |
| 23.22      |     |     | O   |     |        |        |        |      |  |
| ATOM       | 383 | CB  | GLU | 30  | 15.949 | 4.653  | 26.706 | 1.00 |  |
| 37.83      |     |     | C   |     |        |        |        |      |  |
| ATOM       | 384 | CG  | GLU | 30  | 16.986 | 5.777  | 26.724 |      |  |
| 1.00108.13 |     |     |     | C   |        |        |        |      |  |
| ATOM       | 385 | CD  | GLU | 30  | 17.795 | 5.720  | 28.015 |      |  |
| 1.00240.52 |     |     |     | C   |        |        |        |      |  |
| ATOM       | 386 | OE1 | GLU | 30  | 18.825 | 6.373  | 28.076 |      |  |
| 1.00422.56 |     |     |     | O   |        |        |        |      |  |
| ATOM       | 387 | OE2 | GLU | 30  | 17.376 | 5.024  | 28.924 |      |  |
| 1.00410.81 |     |     |     | O1- |        |        |        |      |  |
| ATOM       | 388 | HN  | GLU | 30  | 16.881 | 3.579  | 24.434 | 1.00 |  |
| 15.61      |     |     | H   |     |        |        |        |      |  |
| ATOM       | 389 | HA  | GLU | 30  | 17.377 | 3.195  | 27.334 | 1.00 |  |
| 24.60      |     |     | H   |     |        |        |        |      |  |
| ATOM       | 390 | HB1 | GLU | 30  | 15.404 | 4.654  | 27.638 | 1.00 |  |
| 72.67      |     |     | H   |     |        |        |        |      |  |
| ATOM       | 391 | HB2 | GLU | 30  | 15.263 | 4.808  | 25.886 | 1.00 |  |
| 56.47      |     |     | H   |     |        |        |        |      |  |
| ATOM       | 392 | HG1 | GLU | 30  | 16.485 | 6.731  | 26.659 |      |  |
| 1.00196.66 |     |     |     | H   |        |        |        |      |  |
| ATOM       | 393 | HG2 | GLU | 30  | 17.652 | 5.663  | 25.880 |      |  |
| 1.00140.67 |     |     |     | H   |        |        |        |      |  |
| ATOM       | 394 | N   | LYS | 31  | 15.584 | 1.535  | 27.779 | 1.00 |  |
| 11.96      |     |     | N   |     |        |        |        |      |  |
| ATOM       | 395 | CA  | LYS | 31  | 14.658 | 0.431  | 27.996 | 1.00 |  |
| 11.40      |     |     | C   |     |        |        |        |      |  |
| ATOM       | 396 | C   | LYS | 31  | 13.379 | 0.923  | 28.665 | 1.00 |  |
| 10.99      |     |     | C   |     |        |        |        |      |  |
| ATOM       | 397 | O   | LYS | 31  | 13.314 | 2.049  | 29.159 | 1.00 |  |
| 12.86      |     |     | O   |     |        |        |        |      |  |
| ATOM       | 398 | CB  | LYS | 31  | 15.318 | -0.638 | 28.870 | 1.00 |  |
| 21.40      |     |     | C   |     |        |        |        |      |  |
| ATOM       | 399 | CG  | LYS | 31  | 16.074 | 0.022  | 30.028 | 1.00 |  |
| 57.81      |     |     | C   |     |        |        |        |      |  |
| ATOM       | 400 | CD  | LYS | 31  | 16.688 | -1.060 | 30.917 |      |  |
| 1.00115.52 |     |     |     | C   |        |        |        |      |  |
| ATOM       | 401 | CE  | LYS | 31  | 17.447 | -0.403 | 32.071 |      |  |
| 1.00250.23 |     |     |     | C   |        |        |        |      |  |
| ATOM       | 402 | NZ  | LYS | 31  | 18.037 | -1.459 | 32.943 |      |  |
| 1.00462.10 |     |     |     | N1+ |        |        |        |      |  |
| ATOM       | 403 | HN  | LYS | 31  | 16.176 | 1.804  | 28.507 | 1.00 |  |
| 26.13      |     |     | H   |     |        |        |        |      |  |
| ATOM       | 404 | HA  | LYS | 31  | 14.404 | -0.012 | 27.046 | 1.00 |  |
| 13.87      |     |     | H   |     |        |        |        |      |  |
| ATOM       | 405 | HB1 | LYS | 31  | 16.008 | -1.211 | 28.273 | 1.00 |  |
| 37.63      |     |     | H   |     |        |        |        |      |  |
| ATOM       | 406 | HB2 | LYS | 31  | 14.563 | -1.290 | 29.266 | 1.00 |  |



|            |     |      |     |    |        |        |        |      |  |
|------------|-----|------|-----|----|--------|--------|--------|------|--|
| 47.19      |     |      | H   |    |        |        |        |      |  |
| ATOM       | 407 | HG1  | LYS | 31 | 15.391 | 0.621  | 30.611 |      |  |
| 1.00126.32 |     |      | H   |    |        |        |        |      |  |
| ATOM       | 408 | HG2  | LYS | 31 | 16.861 | 0.649  | 29.635 |      |  |
| 1.00114.19 |     |      | H   |    |        |        |        |      |  |
| ATOM       | 409 | HD1  | LYS | 31 | 17.372 | -1.660 | 30.335 |      |  |
| 1.00198.45 |     |      | H   |    |        |        |        |      |  |
| ATOM       | 410 | HD2  | LYS | 31 | 15.904 | -1.689 | 31.312 |      |  |
| 1.00200.14 |     |      | H   |    |        |        |        |      |  |
| ATOM       | 411 | HE1  | LYS | 31 | 16.767 | 0.203  | 32.650 |      |  |
| 1.00374.64 |     |      | H   |    |        |        |        |      |  |
| ATOM       | 412 | HE2  | LYS | 31 | 18.237 | 0.218  | 31.676 |      |  |
| 1.00403.27 |     |      | H   |    |        |        |        |      |  |
| ATOM       | 413 | HZ1  | LYS | 31 | 18.483 | -2.188 | 32.351 |      |  |
| 1.00627.38 |     |      | H   |    |        |        |        |      |  |
| ATOM       | 414 | HZ2  | LYS | 31 | 17.285 | -1.891 | 33.519 |      |  |
| 1.00622.26 |     |      | H   |    |        |        |        |      |  |
| ATOM       | 415 | HZ3  | LYS | 31 | 18.752 | -1.035 | 33.567 |      |  |
| 1.00619.20 |     |      | H   |    |        |        |        |      |  |
| ATOM       | 416 | N    | THR | 32 | 12.368 | 0.060  | 28.677 | 1.00 |  |
| 15.51      |     |      | N   |    |        |        |        |      |  |
| ATOM       | 417 | CA   | THR | 32 | 11.077 | 0.388  | 29.290 | 1.00 |  |
| 22.44      |     |      | C   |    |        |        |        |      |  |
| ATOM       | 418 | C    | THR | 32 | 10.837 | -0.483 | 30.520 | 1.00 |  |
| 26.60      |     |      | C   |    |        |        |        |      |  |
| ATOM       | 419 | O    | THR | 32 | 10.867 | -1.711 | 30.439 | 1.00 |  |
| 57.43      |     |      | O   |    |        |        |        |      |  |
| ATOM       | 420 | CB   | THR | 32 | 9.953  | 0.155  | 28.277 | 1.00 |  |
| 56.28      |     |      | C   |    |        |        |        |      |  |
| ATOM       | 421 | CG2  | THR | 32 | 8.606  | 0.490  | 28.921 |      |  |
| 1.00102.70 |     |      | C   |    |        |        |        |      |  |
| ATOM       | 422 | OG1  | THR | 32 | 10.159 | 0.987  | 27.144 |      |  |
| 1.00111.17 |     |      | O   |    |        |        |        |      |  |
| ATOM       | 423 | HN   | THR | 32 | 12.493 | -0.823 | 28.268 | 1.00 |  |
| 18.79      |     |      | H   |    |        |        |        |      |  |
| ATOM       | 424 | HA   | THR | 32 | 11.065 | 1.429  | 29.587 | 1.00 |  |
| 19.67      |     |      | H   |    |        |        |        |      |  |
| ATOM       | 425 | HB   | THR | 32 | 9.953  | -0.880 | 27.970 | 1.00 |  |
| 84.25      |     |      | H   |    |        |        |        |      |  |
| ATOM       | 426 | HG1  | THR | 32 | 9.381  | 0.925  | 26.585 |      |  |
| 1.00205.03 |     |      | H   |    |        |        |        |      |  |
| ATOM       | 427 | HG21 | THR | 32 | 7.847  | 0.552  | 28.155 |      |  |
| 1.00220.71 |     |      | H   |    |        |        |        |      |  |
| ATOM       | 428 | HG22 | THR | 32 | 8.679  | 1.439  | 29.434 |      |  |
| 1.00174.67 |     |      | H   |    |        |        |        |      |  |
| ATOM       | 429 | HG23 | THR | 32 | 8.344  | -0.283 | 29.627 |      |  |
| 1.00217.44 |     |      | H   |    |        |        |        |      |  |
| ATOM       | 430 | N    | THR | 33 | 10.594 | 0.160  | 31.659 | 1.00 |  |
| 22.47      |     |      | N   |    |        |        |        |      |  |
| ATOM       | 431 | CA   | THR | 33 | 10.344 | -0.563 | 32.905 | 1.00 |  |
| 41.60      |     |      | C   |    |        |        |        |      |  |
| ATOM       | 432 | C    | THR | 33 | 9.460  | 0.239  | 33.817 | 1.00 |  |

|            |     |      |     |    |        |        |        |      |  |
|------------|-----|------|-----|----|--------|--------|--------|------|--|
| 38.03      |     |      | C   |    |        |        |        |      |  |
| ATOM       | 433 | O    | THR | 33 | 9.927  | 0.948  | 34.710 | 1.00 |  |
| 52.73      |     |      | O   |    |        |        |        |      |  |
| ATOM       | 434 | CB   | THR | 33 | 11.656 | -0.890 | 33.615 | 1.00 |  |
| 63.25      |     |      | C   |    |        |        |        |      |  |
| ATOM       | 435 | CG2  | THR | 33 | 12.428 | -1.943 | 32.818 |      |  |
| 1.00121.65 |     |      |     | C  |        |        |        |      |  |
| ATOM       | 436 | OG1  | THR | 33 | 12.440 | 0.290  | 33.728 | 1.00 |  |
| 96.20      |     |      | O   |    |        |        |        |      |  |
| ATOM       | 437 | HN   | THR | 33 | 10.581 | 1.141  | 31.662 | 1.00 |  |
| 23.82      |     |      | H   |    |        |        |        |      |  |
| ATOM       | 438 | HA   | THR | 33 | 9.823  | -1.476 | 32.692 | 1.00 |  |
| 67.12      |     |      | H   |    |        |        |        |      |  |
| ATOM       | 439 | HB   | THR | 33 | 11.441 | -1.275 | 34.597 |      |  |
| 1.00107.59 |     |      |     | H  |        |        |        |      |  |
| ATOM       | 440 | HG1  | THR | 33 | 13.037 | 0.180  | 34.472 |      |  |
| 1.00176.27 |     |      |     | H  |        |        |        |      |  |
| ATOM       | 441 | HG21 | THR | 33 | 12.799 | -1.505 | 31.905 |      |  |
| 1.00255.23 |     |      |     | H  |        |        |        |      |  |
| ATOM       | 442 | HG22 | THR | 33 | 11.772 | -2.769 | 32.581 |      |  |
| 1.00245.37 |     |      |     | H  |        |        |        |      |  |
| ATOM       | 443 | HG23 | THR | 33 | 13.258 | -2.303 | 33.408 |      |  |
| 1.00185.78 |     |      |     | H  |        |        |        |      |  |
| ATOM       | 444 | N    | GLY | 34 | 8.168  | 0.101  | 33.594 | 1.00 |  |
| 40.93      |     |      | N   |    |        |        |        |      |  |
| ATOM       | 445 | CA   | GLY | 34 | 7.195  | 0.790  | 34.403 | 1.00 |  |
| 45.59      |     |      | C   |    |        |        |        |      |  |
| ATOM       | 446 | C    | GLY | 34 | 7.076  | 2.247  | 33.976 | 1.00 |  |
| 40.97      |     |      | C   |    |        |        |        |      |  |
| ATOM       | 447 | O    | GLY | 34 | 6.216  | 2.982  | 34.458 | 1.00 |  |
| 82.17      |     |      | O   |    |        |        |        |      |  |
| ATOM       | 448 | HN   | GLY | 34 | 7.867  | -0.495 | 32.876 | 1.00 |  |
| 54.00      |     |      | H   |    |        |        |        |      |  |
| ATOM       | 449 | HA1  | GLY | 34 | 7.518  | 0.739  | 35.423 | 1.00 |  |
| 54.41      |     |      | H   |    |        |        |        |      |  |
| ATOM       | 450 | HA2  | GLY | 34 | 6.234  | 0.303  | 34.303 | 1.00 |  |
| 62.09      |     |      | H   |    |        |        |        |      |  |
| ATOM       | 451 | N    | ASN | 35 | 7.949  | 2.648  | 33.056 | 1.00 |  |
| 32.51      |     |      | N   |    |        |        |        |      |  |
| ATOM       | 452 | CA   | ASN | 35 | 7.952  | 4.014  | 32.542 | 1.00 |  |
| 33.20      |     |      | C   |    |        |        |        |      |  |
| ATOM       | 453 | C    | ASN | 35 | 8.595  | 4.047  | 31.162 | 1.00 |  |
| 23.17      |     |      | C   |    |        |        |        |      |  |
| ATOM       | 454 | O    | ASN | 35 | 9.473  | 3.239  | 30.860 | 1.00 |  |
| 27.01      |     |      | O   |    |        |        |        |      |  |
| ATOM       | 455 | CB   | ASN | 35 | 8.726  | 4.933  | 33.487 | 1.00 |  |
| 54.51      |     |      | C   |    |        |        |        |      |  |
| ATOM       | 456 | CG   | ASN | 35 | 8.099  | 4.911  | 34.876 | 1.00 |  |
| 80.73      |     |      | C   |    |        |        |        |      |  |
| ATOM       | 457 | ND2  | ASN | 35 | 8.836  | 4.613  | 35.911 |      |  |
| 1.00220.46 |     |      |     | N  |        |        |        |      |  |
| ATOM       | 458 | OD1  | ASN | 35 | 6.904  | 5.170  | 35.023 |      |  |

|            |     |      |     |    |       |       |        |      |  |  |  |   |
|------------|-----|------|-----|----|-------|-------|--------|------|--|--|--|---|
| 1.00117.80 |     |      |     |    |       |       |        |      |  |  |  | O |
| ATOM       | 459 | HN   | ASN | 35 | 8.604 | 2.008 | 32.709 | 1.00 |  |  |  |   |
| 51.15      |     |      | H   |    |       |       |        |      |  |  |  |   |
| ATOM       | 460 | HA   | ASN | 35 | 6.933 | 4.365 | 32.466 | 1.00 |  |  |  |   |
| 47.21      |     |      | H   |    |       |       |        |      |  |  |  |   |
| ATOM       | 461 | HB1  | ASN | 35 | 8.703 | 5.942 | 33.101 | 1.00 |  |  |  |   |
| 68.31      |     |      | H   |    |       |       |        |      |  |  |  |   |
| ATOM       | 462 | HB2  | ASN | 35 | 9.751 | 4.599 | 33.550 | 1.00 |  |  |  |   |
| 57.75      |     |      | H   |    |       |       |        |      |  |  |  |   |
| ATOM       | 463 | HD21 | ASN | 35 | 9.786 | 4.405 | 35.791 |      |  |  |  |   |
| 1.00405.39 |     |      |     |    |       |       |        |      |  |  |  | H |
| ATOM       | 464 | HD22 | ASN | 35 | 8.439 | 4.595 | 36.807 |      |  |  |  |   |
| 1.00245.64 |     |      |     |    |       |       |        |      |  |  |  | H |
| ATOM       | 465 | N    | PHE | 36 | 8.150 | 4.978 | 30.324 | 1.00 |  |  |  |   |
| 35.72      |     |      | N   |    |       |       |        |      |  |  |  |   |
| ATOM       | 466 | CA   | PHE | 36 | 8.680 | 5.107 | 28.976 | 1.00 |  |  |  |   |
| 33.41      |     |      | C   |    |       |       |        |      |  |  |  |   |
| ATOM       | 467 | C    | PHE | 36 | 9.749 | 6.193 | 28.915 | 1.00 |  |  |  |   |
| 28.51      |     |      | C   |    |       |       |        |      |  |  |  |   |
| ATOM       | 468 | O    | PHE | 36 | 9.591 | 7.270 | 29.492 | 1.00 |  |  |  |   |
| 45.23      |     |      | O   |    |       |       |        |      |  |  |  |   |
| ATOM       | 469 | CB   | PHE | 36 | 7.538 | 5.456 | 28.034 | 1.00 |  |  |  |   |
| 67.53      |     |      | C   |    |       |       |        |      |  |  |  |   |
| ATOM       | 470 | CG   | PHE | 36 | 6.572 | 4.299 | 27.976 | 1.00 |  |  |  |   |
| 86.71      |     |      | C   |    |       |       |        |      |  |  |  |   |
| ATOM       | 471 | CD1  | PHE | 36 | 5.464 | 4.272 | 28.832 |      |  |  |  |   |
| 1.00106.51 |     |      |     |    |       |       |        |      |  |  |  | C |
| ATOM       | 472 | CD2  | PHE | 36 | 6.784 | 3.253 | 27.071 | 1.00 |  |  |  |   |
| 99.48      |     |      | C   |    |       |       |        |      |  |  |  |   |
| ATOM       | 473 | CE1  | PHE | 36 | 4.567 | 3.199 | 28.779 |      |  |  |  |   |
| 1.00134.48 |     |      |     |    |       |       |        |      |  |  |  | C |
| ATOM       | 474 | CE2  | PHE | 36 | 5.888 | 2.179 | 27.020 |      |  |  |  |   |
| 1.00134.27 |     |      |     |    |       |       |        |      |  |  |  | C |
| ATOM       | 475 | CZ   | PHE | 36 | 4.779 | 2.153 | 27.874 |      |  |  |  |   |
| 1.00149.48 |     |      |     |    |       |       |        |      |  |  |  | C |
| ATOM       | 476 | HN   | PHE | 36 | 7.446 | 5.591 | 30.612 | 1.00 |  |  |  |   |
| 62.87      |     |      | H   |    |       |       |        |      |  |  |  |   |
| ATOM       | 477 | HA   | PHE | 36 | 9.113 | 4.167 | 28.662 | 1.00 |  |  |  |   |
| 28.53      |     |      | H   |    |       |       |        |      |  |  |  |   |
| ATOM       | 478 | HB1  | PHE | 36 | 7.928 | 5.650 | 27.056 | 1.00 |  |  |  |   |
| 73.56      |     |      | H   |    |       |       |        |      |  |  |  |   |
| ATOM       | 479 | HB2  | PHE | 36 | 7.026 | 6.336 | 28.399 | 1.00 |  |  |  |   |
| 88.42      |     |      | H   |    |       |       |        |      |  |  |  |   |
| ATOM       | 480 | HD1  | PHE | 36 | 5.302 | 5.080 | 29.531 |      |  |  |  |   |
| 1.00110.20 |     |      |     |    |       |       |        |      |  |  |  | H |
| ATOM       | 481 | HD2  | PHE | 36 | 7.642 | 3.273 | 26.415 | 1.00 |  |  |  |   |
| 93.07      |     |      | H   |    |       |       |        |      |  |  |  |   |
| ATOM       | 482 | HE1  | PHE | 36 | 3.711 | 3.178 | 29.439 |      |  |  |  |   |
| 1.00155.06 |     |      |     |    |       |       |        |      |  |  |  | H |
| ATOM       | 483 | HE2  | PHE | 36 | 6.052 | 1.372 | 26.322 |      |  |  |  |   |
| 1.00159.46 |     |      |     |    |       |       |        |      |  |  |  | H |
| ATOM       | 484 | HZ   | PHE | 36 | 4.086 | 1.324 | 27.834 |      |  |  |  |   |

|            |     |      |     |     |    |        |        |        |      |
|------------|-----|------|-----|-----|----|--------|--------|--------|------|
| 1.00183.25 |     |      |     | H   |    |        |        |        |      |
| ATOM       | 485 | N    | THR |     | 37 | 10.839 | 5.903  | 28.206 | 1.00 |
| 20.06      |     |      | N   |     |    |        |        |        |      |
| ATOM       | 486 | CA   | THR |     | 37 | 11.936 | 6.854  | 28.062 | 1.00 |
| 27.18      |     |      | C   |     |    |        |        |        |      |
| ATOM       | 487 | C    | THR |     | 37 | 12.573 | 6.713  | 26.686 | 1.00 |
| 41.87      |     |      | C   |     |    |        |        |        |      |
| ATOM       | 488 | O    | THR |     | 37 | 13.120 | 5.665  | 26.346 |      |
| 1.00169.86 |     |      |     | O   |    |        |        |        |      |
| ATOM       | 489 | CB   | THR |     | 37 | 12.989 | 6.604  | 29.146 | 1.00 |
| 26.52      |     |      | C   |     |    |        |        |        |      |
| ATOM       | 490 | CG2  | THR |     | 37 | 12.373 | 6.848  | 30.524 | 1.00 |
| 75.69      |     |      | C   |     |    |        |        |        |      |
| ATOM       | 491 | OG1  | THR |     | 37 | 13.446 | 5.260  | 29.057 | 1.00 |
| 81.95      |     |      | O   |     |    |        |        |        |      |
| ATOM       | 492 | HN   | THR |     | 37 | 10.904 | 5.032  | 27.765 | 1.00 |
| 18.47      |     |      | H   |     |    |        |        |        |      |
| ATOM       | 493 | HA   | THR |     | 37 | 11.557 | 7.861  | 28.169 | 1.00 |
| 38.80      |     |      | H   |     |    |        |        |        |      |
| ATOM       | 494 | HB   | THR |     | 37 | 13.820 | 7.278  | 29.003 | 1.00 |
| 81.60      |     |      | H   |     |    |        |        |        |      |
| ATOM       | 495 | HG1  | THR |     | 37 | 12.832 | 4.775  | 28.502 |      |
| 1.00188.80 |     |      |     | H   |    |        |        |        |      |
| ATOM       | 496 | HG21 | THR |     | 37 | 11.806 | 7.767  | 30.508 |      |
| 1.00196.98 |     |      |     | H   |    |        |        |        |      |
| ATOM       | 497 | HG22 | THR |     | 37 | 13.160 | 6.923  | 31.261 |      |
| 1.00196.23 |     |      |     | H   |    |        |        |        |      |
| ATOM       | 498 | HG23 | THR |     | 37 | 11.720 | 6.025  | 30.777 |      |
| 1.00168.92 |     |      |     | H   |    |        |        |        |      |
| ATOM       | 499 | N    | GLU |     | 38 | 12.492 | 7.777  | 25.898 | 1.00 |
| 26.53      |     |      | N   |     |    |        |        |        |      |
| ATOM       | 500 | CA   | GLU |     | 38 | 13.060 | 7.771  | 24.553 | 1.00 |
| 30.29      |     |      | C   |     |    |        |        |        |      |
| ATOM       | 501 | C    | GLU |     | 38 | 14.571 | 7.971  | 24.600 | 1.00 |
| 25.39      |     |      | C   |     |    |        |        |        |      |
| ATOM       | 502 | O    | GLU |     | 38 | 15.117 | 8.425  | 25.605 | 1.00 |
| 51.60      |     |      | O   |     |    |        |        |        |      |
| ATOM       | 503 | CB   | GLU |     | 38 | 12.422 | 8.880  | 23.714 | 1.00 |
| 54.82      |     |      | C   |     |    |        |        |        |      |
| ATOM       | 504 | CG   | GLU |     | 38 | 10.939 | 8.571  | 23.499 |      |
| 1.00165.84 |     |      |     | C   |    |        |        |        |      |
| ATOM       | 505 | CD   | GLU |     | 38 | 10.283 | 9.692  | 22.700 |      |
| 1.00292.92 |     |      |     | C   |    |        |        |        |      |
| ATOM       | 506 | OE1  | GLU |     | 38 | 10.944 | 10.690 | 22.466 |      |
| 1.00414.19 |     |      |     | O   |    |        |        |        |      |
| ATOM       | 507 | OE2  | GLU |     | 38 | 9.130  | 9.535  | 22.335 |      |
| 1.00537.65 |     |      |     | O1- |    |        |        |        |      |
| ATOM       | 508 | HN   | GLU |     | 38 | 12.039 | 8.579  | 26.224 | 1.00 |
| 84.50      |     |      | H   |     |    |        |        |        |      |
| ATOM       | 509 | HA   | GLU |     | 38 | 12.846 | 6.820  | 24.089 | 1.00 |
| 32.15      |     |      | H   |     |    |        |        |        |      |
| ATOM       | 510 | HB1  | GLU |     | 38 | 12.917 | 8.938  | 22.757 |      |

|            |     |     |     |   |    |        |        |        |      |
|------------|-----|-----|-----|---|----|--------|--------|--------|------|
| 1.00144.82 |     |     |     | H |    |        |        |        |      |
| ATOM       | 511 | HB2 | GLU |   | 38 | 12.522 | 9.824  | 24.231 |      |
| 1.00106.49 |     |     |     | H |    |        |        |        |      |
| ATOM       | 512 | HG1 | GLU |   | 38 | 10.449 | 8.482  | 24.457 |      |
| 1.00303.31 |     |     |     | H |    |        |        |        |      |
| ATOM       | 513 | HG2 | GLU |   | 38 | 10.842 | 7.641  | 22.959 |      |
| 1.00323.99 |     |     |     | H |    |        |        |        |      |
| ATOM       | 514 | N   | CYS |   | 39 | 15.239 | 7.631  | 23.501 | 1.00 |
| 15.84      |     |     | N   |   |    |        |        |        |      |
| ATOM       | 515 | CA  | CYS |   | 39 | 16.687 | 7.781  | 23.418 | 1.00 |
| 14.30      |     |     | C   |   |    |        |        |        |      |
| ATOM       | 516 | C   | CYS |   | 39 | 17.072 | 9.253  | 23.605 | 1.00 |
| 22.31      |     |     | C   |   |    |        |        |        |      |
| ATOM       | 517 | O   | CYS |   | 39 | 16.291 | 10.142 | 23.267 | 1.00 |
| 32.92      |     |     | O   |   |    |        |        |        |      |
| ATOM       | 518 | CB  | CYS |   | 39 | 17.172 | 7.284  | 22.054 | 1.00 |
| 18.08      |     |     | C   |   |    |        |        |        |      |
| ATOM       | 519 | SG  | CYS |   | 39 | 16.084 | 7.929  | 20.760 | 1.00 |
| 17.41      |     |     | S   |   |    |        |        |        |      |
| ATOM       | 520 | HN  | CYS |   | 39 | 14.748 | 7.279  | 22.733 | 1.00 |
| 24.87      |     |     | H   |   |    |        |        |        |      |
| ATOM       | 521 | HA  | CYS |   | 39 | 17.143 | 7.182  | 24.191 | 1.00 |
| 14.60      |     |     | H   |   |    |        |        |        |      |
| ATOM       | 522 | HB1 | CYS |   | 39 | 17.154 | 6.205  | 22.036 | 1.00 |
| 27.71      |     |     | H   |   |    |        |        |        |      |
| ATOM       | 523 | HB2 | CYS |   | 39 | 18.179 | 7.629  | 21.882 | 1.00 |
| 34.91      |     |     | H   |   |    |        |        |        |      |
| ATOM       | 524 | N   | PRO |   | 40 | 18.240 | 9.535  | 24.135 | 1.00 |
| 27.27      |     |     | N   |   |    |        |        |        |      |
| ATOM       | 525 | CA  | PRO |   | 40 | 18.691 | 10.940 | 24.359 | 1.00 |
| 47.66      |     |     | C   |   |    |        |        |        |      |
| ATOM       | 526 | C   | PRO |   | 40 | 19.105 | 11.624 | 23.057 | 1.00 |
| 71.54      |     |     | C   |   |    |        |        |        |      |
| ATOM       | 527 | O   | PRO |   | 40 | 19.845 | 11.058 | 22.252 | 1.00 |
| 87.70      |     |     | O   |   |    |        |        |        |      |
| ATOM       | 528 | CB  | PRO |   | 40 | 19.883 | 10.781 | 25.310 | 1.00 |
| 53.85      |     |     | C   |   |    |        |        |        |      |
| ATOM       | 529 | CG  | PRO |   | 40 | 20.455 | 9.445  | 24.969 | 1.00 |
| 46.04      |     |     | C   |   |    |        |        |        |      |
| ATOM       | 530 | CD  | PRO |   | 40 | 19.261 | 8.567  | 24.575 | 1.00 |
| 25.70      |     |     | C   |   |    |        |        |        |      |
| ATOM       | 531 | HA  | PRO |   | 40 | 17.912 | 11.508 | 24.845 | 1.00 |
| 58.04      |     |     | H   |   |    |        |        |        |      |
| ATOM       | 532 | HB1 | PRO |   | 40 | 19.547 | 10.789 | 26.337 | 1.00 |
| 67.93      |     |     | H   |   |    |        |        |        |      |
| ATOM       | 533 | HB2 | PRO |   | 40 | 20.611 | 11.565 | 25.144 | 1.00 |
| 70.99      |     |     | H   |   |    |        |        |        |      |
| ATOM       | 534 | HG1 | PRO |   | 40 | 20.958 | 9.019  | 25.824 | 1.00 |
| 65.91      |     |     | H   |   |    |        |        |        |      |
| ATOM       | 535 | HG2 | PRO |   | 40 | 21.144 | 9.539  | 24.138 | 1.00 |
| 54.99      |     |     | H   |   |    |        |        |        |      |
| ATOM       | 536 | HD1 | PRO |   | 40 | 18.905 | 8.008  | 25.426 | 1.00 |

|            |     |      |     |    |        |        |        |      |
|------------|-----|------|-----|----|--------|--------|--------|------|
| 24.22      |     |      | H   |    |        |        |        |      |
| ATOM       | 537 | HD2  | PRO | 40 | 19.530 | 7.905  | 23.766 | 1.00 |
| 26.94      |     |      | H   |    |        |        |        |      |
| ATOM       | 538 | N    | GLY | 41 | 18.628 | 12.846 | 22.870 |      |
| 1.00105.24 |     |      | N   |    |        |        |        |      |
| ATOM       | 539 | CA   | GLY | 41 | 18.955 | 13.614 | 21.674 |      |
| 1.00147.55 |     |      | C   |    |        |        |        |      |
| ATOM       | 540 | C    | GLY | 41 | 20.447 | 13.910 | 21.612 |      |
| 1.00161.74 |     |      | C   |    |        |        |        |      |
| ATOM       | 541 | O    | GLY | 41 | 21.059 | 13.861 | 20.545 |      |
| 1.00244.37 |     |      | O   |    |        |        |        |      |
| ATOM       | 542 | HN   | GLY | 41 | 18.050 | 13.240 | 23.553 |      |
| 1.00121.79 |     |      | H   |    |        |        |        |      |
| ATOM       | 543 | HA1  | GLY | 41 | 18.411 | 14.546 | 21.691 |      |
| 1.00184.40 |     |      | H   |    |        |        |        |      |
| ATOM       | 544 | HA2  | GLY | 41 | 18.669 | 13.050 | 20.802 |      |
| 1.00157.34 |     |      | H   |    |        |        |        |      |
| ATOM       | 545 | N    | LEU | 42 | 21.023 | 14.222 | 22.767 |      |
| 1.00162.48 |     |      | N   |    |        |        |        |      |
| ATOM       | 546 | CA   | LEU | 42 | 22.448 | 14.534 | 22.855 |      |
| 1.00191.48 |     |      | C   |    |        |        |        |      |
| ATOM       | 547 | C    | LEU | 42 | 23.258 | 13.272 | 23.132 |      |
| 1.00166.66 |     |      | C   |    |        |        |        |      |
| ATOM       | 548 | O    | LEU | 42 | 22.724 | 12.271 | 23.610 |      |
| 1.00251.38 |     |      | O   |    |        |        |        |      |
| ATOM       | 549 | CB   | LEU | 42 | 22.688 | 15.549 | 23.975 |      |
| 1.00307.99 |     |      | C   |    |        |        |        |      |
| ATOM       | 550 | CG   | LEU | 42 | 21.729 | 16.732 | 23.817 |      |
| 1.00452.28 |     |      | C   |    |        |        |        |      |
| ATOM       | 551 | CD1  | LEU | 42 | 21.993 | 17.750 | 24.929 |      |
| 1.00681.24 |     |      | C   |    |        |        |        |      |
| ATOM       | 552 | CD2  | LEU | 42 | 21.935 | 17.395 | 22.446 |      |
| 1.00527.46 |     |      | C   |    |        |        |        |      |
| ATOM       | 553 | HN   | LEU | 42 | 20.478 | 14.245 | 23.581 |      |
| 1.00195.47 |     |      | H   |    |        |        |        |      |
| ATOM       | 554 | HA   | LEU | 42 | 22.780 | 14.963 | 21.919 |      |
| 1.00229.77 |     |      | H   |    |        |        |        |      |
| ATOM       | 555 | HB1  | LEU | 42 | 23.707 | 15.906 | 23.924 |      |
| 1.00342.49 |     |      | H   |    |        |        |        |      |
| ATOM       | 556 | HB2  | LEU | 42 | 22.521 | 15.074 | 24.931 |      |
| 1.00335.33 |     |      | H   |    |        |        |        |      |
| ATOM       | 557 | HG   | LEU | 42 | 20.710 | 16.378 | 23.894 |      |
| 1.00427.79 |     |      | H   |    |        |        |        |      |
| ATOM       | 558 | HD11 | LEU | 42 | 23.054 | 17.935 | 25.002 |      |
| 1.00909.71 |     |      | H   |    |        |        |        |      |
| ATOM       | 559 | HD12 | LEU | 42 | 21.630 | 17.361 | 25.869 |      |
| 1.00706.80 |     |      | H   |    |        |        |        |      |
| ATOM       | 560 | HD13 | LEU | 42 | 21.481 | 18.674 | 24.701 |      |
| 1.00858.82 |     |      | H   |    |        |        |        |      |
| ATOM       | 561 | HD21 | LEU | 42 | 21.412 | 16.828 | 21.690 |      |
| 1.00631.69 |     |      | H   |    |        |        |        |      |
| ATOM       | 562 | HD22 | LEU | 42 | 22.988 | 17.425 | 22.211 |      |

|            |     |      |     |   |    |        |        |        |
|------------|-----|------|-----|---|----|--------|--------|--------|
| 1.00628.06 |     |      |     | H |    |        |        |        |
| ATOM       | 563 | HD23 | LEU |   | 42 | 21.544 | 18.403 | 22.468 |
| 1.00656.75 |     |      |     | H |    |        |        |        |
| ATOM       | 564 | N    | THR |   | 43 | 24.551 | 13.328 | 22.829 |
| 1.00178.52 |     |      |     | N |    |        |        |        |
| ATOM       | 565 | CA   | THR |   | 43 | 25.428 | 12.186 | 23.050 |
| 1.00240.84 |     |      |     | C |    |        |        |        |
| ATOM       | 566 | C    | THR |   | 43 | 25.550 | 11.894 | 24.550 |
| 1.00372.31 |     |      |     | C |    |        |        |        |
| ATOM       | 567 | O    | THR |   | 43 | 25.455 | 12.809 | 25.367 |
| 1.00500.13 |     |      |     | O |    |        |        |        |
| ATOM       | 568 | CB   | THR |   | 43 | 26.813 | 12.496 | 22.469 |
| 1.00354.13 |     |      |     | C |    |        |        |        |
| ATOM       | 569 | CG2  | THR |   | 43 | 26.676 | 12.866 | 20.991 |
| 1.00463.04 |     |      |     | C |    |        |        |        |
| ATOM       | 570 | OG1  | THR |   | 43 | 27.388 | 13.584 | 23.179 |
| 1.00508.50 |     |      |     | O |    |        |        |        |
| ATOM       | 571 | HN   | THR |   | 43 | 24.920 | 14.154 | 22.451 |
| 1.00229.59 |     |      |     | H |    |        |        |        |
| ATOM       | 572 | HA   | THR |   | 43 | 25.017 | 11.329 | 22.542 |
| 1.00249.90 |     |      |     | H |    |        |        |        |
| ATOM       | 573 | HB   | THR |   | 43 | 27.450 | 11.632 | 22.560 |
| 1.00481.58 |     |      |     | H |    |        |        |        |
| ATOM       | 574 | HG1  | THR |   | 43 | 28.342 | 13.514 | 23.109 |
| 1.00624.31 |     |      |     | H |    |        |        |        |
| ATOM       | 575 | HG21 | THR |   | 43 | 27.656 | 13.005 | 20.561 |
| 1.00650.95 |     |      |     | H |    |        |        |        |
| ATOM       | 576 | HG22 | THR |   | 43 | 26.109 | 13.782 | 20.901 |
| 1.00580.73 |     |      |     | H |    |        |        |        |
| ATOM       | 577 | HG23 | THR |   | 43 | 26.163 | 12.072 | 20.467 |
| 1.00571.99 |     |      |     | H |    |        |        |        |
| ATOM       | 578 | N    | PRO |   | 44 | 25.759 | 10.653 | 24.937 |
| 1.00488.39 |     |      |     | N |    |        |        |        |
| ATOM       | 579 | CA   | PRO |   | 44 | 25.894 | 10.280 | 26.377 |
| 1.00760.13 |     |      |     | C |    |        |        |        |
| ATOM       | 580 | C    | PRO |   | 44 | 27.244 | 10.711 | 26.943 |
| 1.00735.36 |     |      |     | C |    |        |        |        |
| ATOM       | 581 | O    | PRO |   | 44 | 27.491 | 10.600 | 28.144 |
| 1.00999.99 |     |      |     | O |    |        |        |        |
| ATOM       | 582 | CB   | PRO |   | 44 | 25.750 | 8.755  | 26.365 |
| 1.00999.99 |     |      |     | C |    |        |        |        |
| ATOM       | 583 | CG   | PRO |   | 44 | 26.269 | 8.339  | 25.029 |
| 1.00856.94 |     |      |     | C |    |        |        |        |
| ATOM       | 584 | CD   | PRO |   | 44 | 25.892 | 9.468  | 24.063 |
| 1.00548.09 |     |      |     | C |    |        |        |        |
| ATOM       | 585 | HA   | PRO |   | 44 | 25.093 | 10.717 | 26.952 |
| 1.00939.00 |     |      |     | H |    |        |        |        |
| ATOM       | 586 | HB1  | PRO |   | 44 | 24.711 | 8.474  | 26.462 |
| 1.00999.99 |     |      |     | H |    |        |        |        |
| ATOM       | 587 | HB2  | PRO |   | 44 | 26.335 | 8.309  | 27.160 |
| 1.00999.99 |     |      |     | H |    |        |        |        |
| ATOM       | 588 | HG1  | PRO |   | 44 | 25.808 | 7.417  | 24.713 |

|            |     |      |     |   |    |        |        |        |
|------------|-----|------|-----|---|----|--------|--------|--------|
| 1.00999.99 |     |      |     | H |    |        |        |        |
| ATOM       | 589 | HG2  | PRO |   | 44 | 27.346 | 8.222  | 25.071 |
| 1.00853.53 |     |      |     | H |    |        |        |        |
| ATOM       | 590 | HD1  | PRO |   | 44 | 24.951 | 9.254  | 23.578 |
| 1.00602.45 |     |      |     | H |    |        |        |        |
| ATOM       | 591 | HD2  | PRO |   | 44 | 26.674 | 9.614  | 23.333 |
| 1.00463.32 |     |      |     | H |    |        |        |        |
| ATOM       | 592 | N    | ILE |   | 45 | 28.116 | 11.197 | 26.066 |
| 1.00518.33 |     |      |     | N |    |        |        |        |
| ATOM       | 593 | CA   | ILE |   | 45 | 29.441 | 11.634 | 26.481 |
| 1.00582.79 |     |      |     | C |    |        |        |        |
| ATOM       | 594 | C    | ILE |   | 45 | 29.337 | 12.784 | 27.477 |
| 1.00795.93 |     |      |     | C |    |        |        |        |
| ATOM       | 595 | O    | ILE |   | 45 | 28.635 | 13.767 | 27.236 |
| 1.00898.75 |     |      |     | O |    |        |        |        |
| ATOM       | 596 | CB   | ILE |   | 45 | 30.245 | 12.088 | 25.262 |
| 1.00474.41 |     |      |     | C |    |        |        |        |
| ATOM       | 597 | CG1  | ILE |   | 45 | 30.452 | 10.900 | 24.318 |
| 1.00516.90 |     |      |     | C |    |        |        |        |
| ATOM       | 598 | CG2  | ILE |   | 45 | 31.605 | 12.621 | 25.716 |
| 1.00760.75 |     |      |     | C |    |        |        |        |
| ATOM       | 599 | CD1  | ILE |   | 45 | 31.014 | 11.397 | 22.985 |
| 1.00566.81 |     |      |     | C |    |        |        |        |
| ATOM       | 600 | HN   | ILE |   | 45 | 27.864 | 11.256 | 25.120 |
| 1.00395.72 |     |      |     | H |    |        |        |        |
| ATOM       | 601 | HA   | ILE |   | 45 | 29.952 | 10.808 | 26.947 |
| 1.00711.06 |     |      |     | H |    |        |        |        |
| ATOM       | 602 | HB   | ILE |   | 45 | 29.706 | 12.870 | 24.747 |
| 1.00477.81 |     |      |     | H |    |        |        |        |
| ATOM       | 603 | HG11 | ILE |   | 45 | 29.506 | 10.409 | 24.146 |
| 1.00624.28 |     |      |     | H |    |        |        |        |
| ATOM       | 604 | HG12 | ILE |   | 45 | 31.144 | 10.203 | 24.766 |
| 1.00744.84 |     |      |     | H |    |        |        |        |
| ATOM       | 605 | HG21 | ILE |   | 45 | 32.050 | 11.924 | 26.413 |
| 1.00920.57 |     |      |     | H |    |        |        |        |
| ATOM       | 606 | HG22 | ILE |   | 45 | 31.474 | 13.578 | 26.197 |
| 1.00999.99 |     |      |     | H |    |        |        |        |
| ATOM       | 607 | HG23 | ILE |   | 45 | 32.252 | 12.735 | 24.858 |
| 1.00865.46 |     |      |     | H |    |        |        |        |
| ATOM       | 608 | HD11 | ILE |   | 45 | 31.029 | 10.585 | 22.276 |
| 1.00658.89 |     |      |     | H |    |        |        |        |
| ATOM       | 609 | HD12 | ILE |   | 45 | 32.019 | 11.766 | 23.134 |
| 1.00734.30 |     |      |     | H |    |        |        |        |
| ATOM       | 610 | HD13 | ILE |   | 45 | 30.392 | 12.195 | 22.607 |
| 1.00675.84 |     |      |     | H |    |        |        |        |
| ATOM       | 611 | N    | ALA |   | 46 | 30.040 | 12.655 | 28.597 |
| 1.00999.99 |     |      |     | N |    |        |        |        |
| ATOM       | 612 | CA   | ALA |   | 46 | 30.019 | 13.691 | 29.625 |
| 1.00999.99 |     |      |     | C |    |        |        |        |
| ATOM       | 613 | C    | ALA |   | 46 | 28.586 | 14.107 | 29.937 |
| 1.00999.99 |     |      |     | C |    |        |        |        |
| ATOM       | 614 | CB   | ALA |   | 46 | 30.817 | 14.908 | 29.155 |



|            |     |     |     |   |    |        |        |        |
|------------|-----|-----|-----|---|----|--------|--------|--------|
| 1.00999.99 |     |     |     | C |    |        |        |        |
| ATOM       | 615 | OT1 | ALA |   | 46 | 27.681 | 13.405 | 29.516 |
| 1.00999.99 |     |     |     | O |    |        |        |        |
| ATOM       | 616 | OT2 | ALA |   | 46 | 28.414 | 15.121 | 30.590 |
| 1.00999.99 |     |     |     | O |    |        |        |        |
| ATOM       | 617 | HN  | ALA |   | 46 | 30.582 | 11.851 | 28.735 |
| 1.00999.99 |     |     |     | H |    |        |        |        |
| ATOM       | 618 | HA  | ALA |   | 46 | 30.475 | 13.301 | 30.522 |
| 1.00999.99 |     |     |     | H |    |        |        |        |
| ATOM       | 619 | HB1 | ALA |   | 46 | 30.293 | 15.391 | 28.344 |
| 1.00999.99 |     |     |     | H |    |        |        |        |
| ATOM       | 620 | HB2 | ALA |   | 46 | 31.791 | 14.591 | 28.814 |
| 1.00999.99 |     |     |     | H |    |        |        |        |
| ATOM       | 621 | HB3 | ALA |   | 46 | 30.931 | 15.602 | 29.974 |
| 1.00999.99 |     |     |     | H |    |        |        |        |
| ENDMDL     |     |     |     |   |    |        |        |        |
| TER        |     |     |     |   |    |        |        |        |
| MODEL      | 13  |     |     |   |    |        |        |        |
| ATOM       | 1   | N   | GLY |   | 1  | 24.379 | -4.581 | 19.094 |
| 1.00999.99 |     |     |     | N |    |        |        |        |
| ATOM       | 2   | CA  | GLY |   | 1  | 24.678 | -3.266 | 19.730 |
| 1.00999.99 |     |     |     | C |    |        |        |        |
| ATOM       | 3   | C   | GLY |   | 1  | 24.198 | -2.140 | 18.823 |
| 1.00999.99 |     |     |     | C |    |        |        |        |
| ATOM       | 4   | O   | GLY |   | 1  | 23.713 | -1.112 | 19.295 |
| 1.00999.99 |     |     |     | O |    |        |        |        |
| ATOM       | 5   | HA1 | GLY |   | 1  | 25.742 | -3.174 | 19.882 |
| 1.00999.99 |     |     |     | H |    |        |        |        |
| ATOM       | 6   | HA2 | GLY |   | 1  | 24.171 | -3.205 | 20.683 |
| 1.00999.99 |     |     |     | H |    |        |        |        |
| ATOM       | 7   | HT1 | GLY |   | 1  | 24.185 | -4.441 | 18.083 |
| 1.00999.99 |     |     |     | H |    |        |        |        |
| ATOM       | 8   | HT2 | GLY |   | 1  | 23.547 | -5.006 | 19.552 |
| 1.00999.99 |     |     |     | H |    |        |        |        |
| ATOM       | 9   | HT3 | GLY |   | 1  | 25.196 | -5.214 | 19.204 |
| 1.00999.99 |     |     |     | H |    |        |        |        |
| ATOM       | 10  | N   | LEU |   | 2  | 24.335 | -2.341 | 17.516 |
| 1.00999.99 |     |     |     | N |    |        |        |        |
| ATOM       | 11  | CA  | LEU |   | 2  | 23.911 | -1.336 | 16.548 |
| 1.00895.59 |     |     |     | C |    |        |        |        |
| ATOM       | 12  | C   | LEU |   | 2  | 22.389 | -1.299 | 16.457 |
| 1.00532.27 |     |     |     | C |    |        |        |        |
| ATOM       | 13  | O   | LEU |   | 2  | 21.721 | -2.310 | 16.679 |
| 1.00625.21 |     |     |     | O |    |        |        |        |
| ATOM       | 14  | CB  | LEU |   | 2  | 24.498 | -1.652 | 15.170 |
| 1.00999.99 |     |     |     | C |    |        |        |        |
| ATOM       | 15  | CG  | LEU |   | 2  | 26.031 | -1.707 | 15.254 |
| 1.00999.99 |     |     |     | C |    |        |        |        |
| ATOM       | 16  | CD1 | LEU |   | 2  | 26.593 | -2.106 | 13.886 |
| 1.00999.99 |     |     |     | C |    |        |        |        |
| ATOM       | 17  | CD2 | LEU |   | 2  | 26.589 | -0.333 | 15.664 |
| 1.00999.99 |     |     |     | C |    |        |        |        |

|            |    |      |     |   |        |        |        |      |
|------------|----|------|-----|---|--------|--------|--------|------|
| ATOM       | 18 | HN   | LEU | 2 | 24.728 | -3.181 | 17.198 |      |
| 1.00999.99 |    |      |     |   |        |        |        | H    |
| ATOM       | 19 | HA   | LEU | 2 | 24.263 | -0.367 | 16.867 |      |
| 1.00890.87 |    |      |     |   |        |        |        | H    |
| ATOM       | 20 | HB1  | LEU | 2 | 24.207 | -0.884 | 14.470 |      |
| 1.00924.07 |    |      |     |   |        |        |        | H    |
| ATOM       | 21 | HB2  | LEU | 2 | 24.123 | -2.607 | 14.833 |      |
| 1.00999.99 |    |      |     |   |        |        |        | H    |
| ATOM       | 22 | HG   | LEU | 2 | 26.320 | -2.449 | 15.987 |      |
| 1.00999.99 |    |      |     |   |        |        |        | H    |
| ATOM       | 23 | HD11 | LEU | 2 | 26.489 | -1.279 | 13.199 |      |
| 1.00999.99 |    |      |     |   |        |        |        | H    |
| ATOM       | 24 | HD12 | LEU | 2 | 26.049 | -2.959 | 13.507 |      |
| 1.00999.99 |    |      |     |   |        |        |        | H    |
| ATOM       | 25 | HD13 | LEU | 2 | 27.638 | -2.360 | 13.986 |      |
| 1.00999.99 |    |      |     |   |        |        |        | H    |
| ATOM       | 26 | HD21 | LEU | 2 | 25.988 | 0.452  | 15.225 |      |
| 1.00999.99 |    |      |     |   |        |        |        | H    |
| ATOM       | 27 | HD22 | LEU | 2 | 27.610 | -0.236 | 15.320 |      |
| 1.00999.99 |    |      |     |   |        |        |        | H    |
| ATOM       | 28 | HD23 | LEU | 2 | 26.568 | -0.242 | 16.739 |      |
| 1.00999.99 |    |      |     |   |        |        |        | H    |
| ATOM       | 29 | N    | CYS | 3 | 21.844 | -0.129 | 16.134 |      |
| 1.00271.28 |    |      |     |   |        |        |        | N    |
| ATOM       | 30 | CA   | CYS | 3 | 20.397 | 0.025  | 16.023 |      |
| 1.00104.50 |    |      |     |   |        |        |        | C    |
| ATOM       | 31 | C    | CYS | 3 | 19.906 | -0.459 | 14.662 | 1.00 |
| 90.98      |    |      | C   |   |        |        |        |      |
| ATOM       | 32 | O    | CYS | 3 | 20.109 | 0.206  | 13.647 |      |
| 1.00207.28 |    |      |     |   |        |        |        | O    |
| ATOM       | 33 | CB   | CYS | 3 | 20.011 | 1.494  | 16.206 | 1.00 |
| 37.83      |    |      | C   |   |        |        |        |      |
| ATOM       | 34 | SG   | CYS | 3 | 20.523 | 2.059  | 17.848 | 1.00 |
| 81.56      |    |      | S   |   |        |        |        |      |
| ATOM       | 35 | HN   | CYS | 3 | 22.425 | 0.643  | 15.972 |      |
| 1.00296.55 |    |      |     |   |        |        |        | H    |
| ATOM       | 36 | HA   | CYS | 3 | 19.920 | -0.560 | 16.797 |      |
| 1.00166.45 |    |      |     |   |        |        |        | H    |
| ATOM       | 37 | HB1  | CYS | 3 | 18.941 | 1.600  | 16.107 | 1.00 |
| 40.38      |    |      | H   |   |        |        |        |      |
| ATOM       | 38 | HB2  | CYS | 3 | 20.502 | 2.090  | 15.452 | 1.00 |
| 98.45      |    |      | H   |   |        |        |        |      |
| ATOM       | 39 | N    | SER | 4 | 19.251 | -1.614 | 14.653 | 1.00 |
| 85.31      |    |      | N   |   |        |        |        |      |
| ATOM       | 40 | CA   | SER | 4 | 18.725 | -2.174 | 13.413 | 1.00 |
| 92.94      |    |      | C   |   |        |        |        |      |
| ATOM       | 41 | C    | SER | 4 | 17.683 | -1.239 | 12.827 | 1.00 |
| 67.37      |    |      | C   |   |        |        |        |      |
| ATOM       | 42 | O    | SER | 4 | 17.637 | -1.007 | 11.619 |      |
| 1.00102.28 |    |      |     |   |        |        |        | O    |
| ATOM       | 43 | CB   | SER | 4 | 18.056 | -3.518 | 13.687 |      |
| 1.00123.83 |    |      |     |   |        |        |        | C    |

|            |    |     |     |   |        |        |        |      |
|------------|----|-----|-----|---|--------|--------|--------|------|
| ATOM       | 44 | OG  | SER | 4 | 17.673 | -4.111 | 12.453 |      |
| 1.00178.89 |    |     | O   |   |        |        |        |      |
| ATOM       | 45 | HN  | SER | 4 | 19.114 | -2.097 | 15.496 |      |
| 1.00163.03 |    |     | H   |   |        |        |        |      |
| ATOM       | 46 | HA  | SER | 4 | 19.529 | -2.312 | 12.707 |      |
| 1.00129.78 |    |     | H   |   |        |        |        |      |
| ATOM       | 47 | HB1 | SER | 4 | 17.176 | -3.353 | 14.301 |      |
| 1.00105.26 |    |     | H   |   |        |        |        |      |
| ATOM       | 48 | HB2 | SER | 4 | 18.739 | -4.171 | 14.202 |      |
| 1.00156.87 |    |     | H   |   |        |        |        |      |
| ATOM       | 49 | HG  | SER | 4 | 18.067 | -3.597 | 11.742 |      |
| 1.00218.16 |    |     | H   |   |        |        |        |      |
| ATOM       | 50 | N   | GLU | 5 | 16.833 | -0.724 | 13.707 | 1.00 |
| 41.67      |    |     | N   |   |        |        |        |      |
| ATOM       | 51 | CA  | GLU | 5 | 15.755 | 0.173  | 13.311 | 1.00 |
| 41.21      |    |     | C   |   |        |        |        |      |
| ATOM       | 52 | C   | GLU | 5 | 15.564 | 1.269  | 14.355 | 1.00 |
| 41.92      |    |     | C   |   |        |        |        |      |
| ATOM       | 53 | O   | GLU | 5 | 16.422 | 1.472  | 15.215 | 1.00 |
| 74.72      |    |     | O   |   |        |        |        |      |
| ATOM       | 54 | CB  | GLU | 5 | 14.467 | -0.630 | 13.158 | 1.00 |
| 49.24      |    |     | C   |   |        |        |        |      |
| ATOM       | 55 | CG  | GLU | 5 | 14.160 | -1.336 | 14.474 | 1.00 |
| 55.48      |    |     | C   |   |        |        |        |      |
| ATOM       | 56 | CD  | GLU | 5 | 13.027 | -2.338 | 14.281 | 1.00 |
| 92.06      |    |     | C   |   |        |        |        |      |
| ATOM       | 57 | OE1 | GLU | 5 | 12.670 | -2.991 | 15.248 |      |
| 1.00206.49 |    |     | O   |   |        |        |        |      |
| ATOM       | 58 | OE2 | GLU | 5 | 12.532 | -2.435 | 13.171 |      |
| 1.00197.24 |    |     | O1- |   |        |        |        |      |
| ATOM       | 59 | HN  | GLU | 5 | 16.923 | -0.969 | 14.652 | 1.00 |
| 45.52      |    |     | H   |   |        |        |        |      |
| ATOM       | 60 | HA  | GLU | 5 | 15.994 | 0.623  | 12.369 | 1.00 |
| 60.63      |    |     | H   |   |        |        |        |      |
| ATOM       | 61 | HB1 | GLU | 5 | 14.589 | -1.367 | 12.379 | 1.00 |
| 61.59      |    |     | H   |   |        |        |        |      |
| ATOM       | 62 | HB2 | GLU | 5 | 13.660 | 0.029  | 12.907 | 1.00 |
| 63.66      |    |     | H   |   |        |        |        |      |
| ATOM       | 63 | HG1 | GLU | 5 | 13.872 | -0.604 | 15.213 | 1.00 |
| 58.03      |    |     | H   |   |        |        |        |      |
| ATOM       | 64 | HG2 | GLU | 5 | 15.045 | -1.849 | 14.806 | 1.00 |
| 57.77      |    |     | H   |   |        |        |        |      |
| ATOM       | 65 | N   | ASN | 6 | 14.440 | 1.972  | 14.276 | 1.00 |
| 50.73      |    |     | N   |   |        |        |        |      |
| ATOM       | 66 | CA  | ASN | 6 | 14.160 | 3.043  | 15.225 | 1.00 |
| 71.04      |    |     | C   |   |        |        |        |      |
| ATOM       | 67 | C   | ASN | 6 | 14.120 | 2.493  | 16.647 | 1.00 |
| 65.17      |    |     | C   |   |        |        |        |      |
| ATOM       | 68 | O   | ASN | 6 | 14.613 | 3.124  | 17.583 | 1.00 |
| 94.86      |    |     | O   |   |        |        |        |      |
| ATOM       | 69 | CB  | ASN | 6 | 12.820 | 3.701  | 14.891 | 1.00 |
| 94.83      |    |     | C   |   |        |        |        |      |

|            |    |      |     |   |        |        |        |      |
|------------|----|------|-----|---|--------|--------|--------|------|
| ATOM       | 70 | CG   | ASN | 6 | 12.946 | 4.520  | 13.611 |      |
| 1.00160.94 |    |      | C   |   |        |        |        |      |
| ATOM       | 71 | ND2  | ASN | 6 | 11.873 | 4.831  | 12.938 |      |
| 1.00244.88 |    |      | N   |   |        |        |        |      |
| ATOM       | 72 | OD1  | ASN | 6 | 14.052 | 4.888  | 13.214 |      |
| 1.00219.73 |    |      | O   |   |        |        |        |      |
| ATOM       | 73 | HN   | ASN | 6 | 13.790 | 1.769  | 13.571 | 1.00 |
| 72.81      |    |      | H   |   |        |        |        |      |
| ATOM       | 74 | HA   | ASN | 6 | 14.942 | 3.786  | 15.157 | 1.00 |
| 96.02      |    |      | H   |   |        |        |        |      |
| ATOM       | 75 | HB1  | ASN | 6 | 12.527 | 4.351  | 15.703 |      |
| 1.00111.09 |    |      | H   |   |        |        |        |      |
| ATOM       | 76 | HB2  | ASN | 6 | 12.069 | 2.936  | 14.755 | 1.00 |
| 98.13      |    |      | H   |   |        |        |        |      |
| ATOM       | 77 | HD21 | ASN | 6 | 10.993 | 4.538  | 13.256 |      |
| 1.00272.43 |    |      | H   |   |        |        |        |      |
| ATOM       | 78 | HD22 | ASN | 6 | 11.945 | 5.356  | 12.114 |      |
| 1.00336.78 |    |      | H   |   |        |        |        |      |
| ATOM       | 79 | N    | GLY | 7 | 13.532 | 1.308  | 16.800 | 1.00 |
| 51.80      |    |      | N   |   |        |        |        |      |
| ATOM       | 80 | CA   | GLY | 7 | 13.429 | 0.658  | 18.109 | 1.00 |
| 71.47      |    |      | C   |   |        |        |        |      |
| ATOM       | 81 | C    | GLY | 7 | 14.064 | -0.726 | 18.070 | 1.00 |
| 41.04      |    |      | C   |   |        |        |        |      |
| ATOM       | 82 | O    | GLY | 7 | 13.381 | -1.739 | 18.214 | 1.00 |
| 44.54      |    |      | O   |   |        |        |        |      |
| ATOM       | 83 | HN   | GLY | 7 | 13.162 | 0.855  | 16.014 | 1.00 |
| 45.49      |    |      | H   |   |        |        |        |      |
| ATOM       | 84 | HA1  | GLY | 7 | 12.392 | 0.557  | 18.374 |      |
| 1.00103.52 |    |      | H   |   |        |        |        |      |
| ATOM       | 85 | HA2  | GLY | 7 | 13.930 | 1.257  | 18.860 |      |
| 1.00108.67 |    |      | H   |   |        |        |        |      |
| ATOM       | 86 | N    | ASP | 8 | 15.373 | -0.755 | 17.869 | 1.00 |
| 27.00      |    |      | N   |   |        |        |        |      |
| ATOM       | 87 | CA   | ASP | 8 | 16.100 | -2.017 | 17.806 | 1.00 |
| 14.15      |    |      | C   |   |        |        |        |      |
| ATOM       | 88 | C    | ASP | 8 | 15.962 | -2.786 | 19.112 | 1.00 |
| 9.37       |    |      | C   |   |        |        |        |      |
| ATOM       | 89 | O    | ASP | 8 | 15.716 | -3.992 | 19.112 | 1.00 |
| 14.61      |    |      | O   |   |        |        |        |      |
| ATOM       | 90 | CB   | ASP | 8 | 17.580 | -1.757 | 17.518 | 1.00 |
| 15.06      |    |      | C   |   |        |        |        |      |
| ATOM       | 91 | CG   | ASP | 8 | 18.323 | -3.080 | 17.373 | 1.00 |
| 21.22      |    |      | C   |   |        |        |        |      |
| ATOM       | 92 | OD1  | ASP | 8 | 19.488 | -3.045 | 17.008 |      |
| 1.00119.56 |    |      | O   |   |        |        |        |      |
| ATOM       | 93 | OD2  | ASP | 8 | 17.719 | -4.109 | 17.628 |      |
| 1.00133.27 |    |      | O1- |   |        |        |        |      |
| ATOM       | 94 | HN   | ASP | 8 | 15.856 | 0.088  | 17.760 | 1.00 |
| 35.63      |    |      | H   |   |        |        |        |      |
| ATOM       | 95 | HA   | ASP | 8 | 15.692 | -2.614 | 17.008 | 1.00 |
| 20.92      |    |      | H   |   |        |        |        |      |

|            |     |     |     |    |        |        |        |      |
|------------|-----|-----|-----|----|--------|--------|--------|------|
| ATOM       | 96  | HB1 | ASP | 8  | 18.007 | -1.195 | 18.335 | 1.00 |
| 29.39      |     | H   |     |    |        |        |        |      |
| ATOM       | 97  | HB2 | ASP | 8  | 17.672 | -1.190 | 16.604 | 1.00 |
| 44.14      |     | H   |     |    |        |        |        |      |
| ATOM       | 98  | N   | CYS | 9  | 16.117 | -2.080 | 20.224 | 1.00 |
| 5.93       |     | N   |     |    |        |        |        |      |
| ATOM       | 99  | CA  | CYS | 9  | 15.998 | -2.711 | 21.533 | 1.00 |
| 7.54       |     | C   |     |    |        |        |        |      |
| ATOM       | 100 | C   | CYS | 9  | 14.592 | -3.270 | 21.707 | 1.00 |
| 14.60      |     | C   |     |    |        |        |        |      |
| ATOM       | 101 | O   | CYS | 9  | 14.401 | -4.385 | 22.192 | 1.00 |
| 25.78      |     | O   |     |    |        |        |        |      |
| ATOM       | 102 | CB  | CYS | 9  | 16.281 | -1.694 | 22.627 | 1.00 |
| 6.63       |     | C   |     |    |        |        |        |      |
| ATOM       | 103 | SG  | CYS | 9  | 18.029 | -1.274 | 22.580 | 1.00 |
| 10.91      |     | S   |     |    |        |        |        |      |
| ATOM       | 104 | HN  | CYS | 9  | 16.307 | -1.123 | 20.161 | 1.00 |
| 6.51       |     | H   |     |    |        |        |        |      |
| ATOM       | 105 | HA  | CYS | 9  | 16.721 | -3.504 | 21.608 | 1.00 |
| 11.12      |     | H   |     |    |        |        |        |      |
| ATOM       | 106 | HB1 | CYS | 9  | 16.041 | -2.119 | 23.588 | 1.00 |
| 11.28      |     | H   |     |    |        |        |        |      |
| ATOM       | 107 | HB2 | CYS | 9  | 15.686 | -0.806 | 22.463 | 1.00 |
| 5.04       |     | H   |     |    |        |        |        |      |
| ATOM       | 108 | N   | ALA | 10 | 13.616 | -2.472 | 21.292 | 1.00 |
| 16.26      |     | N   |     |    |        |        |        |      |
| ATOM       | 109 | CA  | ALA | 10 | 12.212 | -2.856 | 21.374 | 1.00 |
| 32.04      |     | C   |     |    |        |        |        |      |
| ATOM       | 110 | C   | ALA | 10 | 11.363 | -1.837 | 20.618 | 1.00 |
| 45.47      |     | C   |     |    |        |        |        |      |
| ATOM       | 111 | O   | ALA | 10 | 11.821 | -0.729 | 20.338 |      |
| 1.00119.04 |     |     |     |    |        |        |        | O    |
| ATOM       | 112 | CB  | ALA | 10 | 11.768 | -2.929 | 22.838 | 1.00 |
| 30.10      |     | C   |     |    |        |        |        |      |
| ATOM       | 113 | HN  | ALA | 10 | 13.848 | -1.602 | 20.910 | 1.00 |
| 12.81      |     | H   |     |    |        |        |        |      |
| ATOM       | 114 | HA  | ALA | 10 | 12.086 | -3.826 | 20.918 | 1.00 |
| 47.14      |     | H   |     |    |        |        |        |      |
| ATOM       | 115 | HB1 | ALA | 10 | 11.545 | -1.938 | 23.201 | 1.00 |
| 84.37      |     | H   |     |    |        |        |        |      |
| ATOM       | 116 | HB2 | ALA | 10 | 12.557 | -3.362 | 23.433 |      |
| 1.00118.20 |     |     |     |    |        |        |        | H    |
| ATOM       | 117 | HB3 | ALA | 10 | 10.883 | -3.545 | 22.914 |      |
| 1.00117.32 |     |     |     |    |        |        |        | H    |
| ATOM       | 118 | N   | ALA | 11 | 10.135 | -2.209 | 20.283 | 1.00 |
| 30.62      |     | N   |     |    |        |        |        |      |
| ATOM       | 119 | CA  | ALA | 11 | 9.260  | -1.297 | 19.553 | 1.00 |
| 35.24      |     | C   |     |    |        |        |        |      |
| ATOM       | 120 | C   | ALA | 11 | 9.021  | -0.022 | 20.358 | 1.00 |
| 22.78      |     | C   |     |    |        |        |        |      |
| ATOM       | 121 | O   | ALA | 11 | 9.098  | 1.083  | 19.823 | 1.00 |
| 53.33      |     | O   |     |    |        |        |        |      |

|            |     |     |     |    |        |        |        |      |
|------------|-----|-----|-----|----|--------|--------|--------|------|
| ATOM       | 122 | CB  | ALA | 11 | 7.921  | -1.979 | 19.264 | 1.00 |
| 60.49      |     |     | C   |    |        |        |        |      |
| ATOM       | 123 | HN  | ALA | 11 | 9.814  | -3.102 | 20.525 | 1.00 |
| 50.37      |     |     | H   |    |        |        |        |      |
| ATOM       | 124 | HA  | ALA | 11 | 9.728  | -1.039 | 18.616 | 1.00 |
| 41.70      |     |     | H   |    |        |        |        |      |
| ATOM       | 125 | HB1 | ALA | 11 | 7.527  | -2.400 | 20.175 |      |
| 1.00157.06 |     |     |     |    |        |        |        | H    |
| ATOM       | 126 | HB2 | ALA | 11 | 8.067  | -2.765 | 18.537 |      |
| 1.00148.83 |     |     |     |    |        |        |        | H    |
| ATOM       | 127 | HB3 | ALA | 11 | 7.224  | -1.253 | 18.872 |      |
| 1.00137.06 |     |     |     |    |        |        |        | H    |
| ATOM       | 128 | N   | ASP | 12 | 8.736  | -0.183 | 21.646 | 1.00 |
| 18.98      |     |     | N   |    |        |        |        |      |
| ATOM       | 129 | CA  | ASP | 12 | 8.492  | 0.962  | 22.515 | 1.00 |
| 31.05      |     |     | C   |    |        |        |        |      |
| ATOM       | 130 | C   | ASP | 12 | 9.788  | 1.722  | 22.800 | 1.00 |
| 22.98      |     |     | C   |    |        |        |        |      |
| ATOM       | 131 | O   | ASP | 12 | 9.798  | 2.951  | 22.864 | 1.00 |
| 37.14      |     |     | O   |    |        |        |        |      |
| ATOM       | 132 | CB  | ASP | 12 | 7.876  | 0.494  | 23.835 | 1.00 |
| 48.35      |     |     | C   |    |        |        |        |      |
| ATOM       | 133 | CG  | ASP | 12 | 6.446  | 0.019  | 23.604 |      |
| 1.00104.83 |     |     |     |    |        |        |        | C    |
| ATOM       | 134 | OD1 | ASP | 12 | 5.911  | 0.305  | 22.546 |      |
| 1.00258.73 |     |     |     |    |        |        |        | O    |
| ATOM       | 135 | OD2 | ASP | 12 | 5.906  | -0.626 | 24.489 |      |
| 1.00213.46 |     |     |     |    |        |        |        | O1-  |
| ATOM       | 136 | HN  | ASP | 12 | 8.691  | -1.089 | 22.019 | 1.00 |
| 36.19      |     |     | H   |    |        |        |        |      |
| ATOM       | 137 | HA  | ASP | 12 | 7.797  | 1.631  | 22.028 | 1.00 |
| 49.76      |     |     | H   |    |        |        |        |      |
| ATOM       | 138 | HB1 | ASP | 12 | 7.871  | 1.313  | 24.537 | 1.00 |
| 95.71      |     |     | H   |    |        |        |        |      |
| ATOM       | 139 | HB2 | ASP | 12 | 8.465  | -0.320 | 24.236 | 1.00 |
| 54.37      |     |     | H   |    |        |        |        |      |
| ATOM       | 140 | N   | GLU | 13 | 10.873 | 0.976  | 22.985 | 1.00 |
| 17.60      |     |     | N   |    |        |        |        |      |
| ATOM       | 141 | CA  | GLU | 13 | 12.172 | 1.577  | 23.278 | 1.00 |
| 12.01      |     |     | C   |    |        |        |        |      |
| ATOM       | 142 | C   | GLU | 13 | 12.771 | 2.229  | 22.033 | 1.00 |
| 10.07      |     |     | C   |    |        |        |        |      |
| ATOM       | 143 | O   | GLU | 13 | 12.367 | 1.927  | 20.910 | 1.00 |
| 12.81      |     |     | O   |    |        |        |        |      |
| ATOM       | 144 | CB  | GLU | 13 | 13.118 | 0.505  | 23.818 | 1.00 |
| 11.74      |     |     | C   |    |        |        |        |      |
| ATOM       | 145 | CG  | GLU | 13 | 12.550 | -0.042 | 25.130 | 1.00 |
| 13.49      |     |     | C   |    |        |        |        |      |
| ATOM       | 146 | CD  | GLU | 13 | 13.418 | -1.183 | 25.645 |      |
| 1.00142.36 |     |     |     |    |        |        |        | C    |
| ATOM       | 147 | OE1 | GLU | 13 | 14.533 | -1.314 | 25.172 |      |
| 1.00339.06 |     |     |     |    |        |        |        | O    |

|            |     |     |     |     |        |        |        |      |
|------------|-----|-----|-----|-----|--------|--------|--------|------|
| ATOM       | 148 | OE2 | GLU | 13  | 12.953 | -1.914 | 26.504 |      |
| 1.00335.28 |     |     |     | 01- |        |        |        |      |
| ATOM       | 149 | HN  | GLU | 13  | 10.798 | 0.000  | 22.930 | 1.00 |
| 28.36      |     |     | H   |     |        |        |        |      |
| ATOM       | 150 | HA  | GLU | 13  | 12.041 | 2.332  | 24.040 | 1.00 |
| 13.06      |     |     | H   |     |        |        |        |      |
| ATOM       | 151 | HB1 | GLU | 13  | 14.090 | 0.938  | 23.999 | 1.00 |
| 13.76      |     |     | H   |     |        |        |        |      |
| ATOM       | 152 | HB2 | GLU | 13  | 13.207 | -0.294 | 23.096 | 1.00 |
| 9.94       |     |     | H   |     |        |        |        |      |
| ATOM       | 153 | HG1 | GLU | 13  | 11.546 | -0.403 | 24.965 | 1.00 |
| 66.02      |     |     | H   |     |        |        |        |      |
| ATOM       | 154 | HG2 | GLU | 13  | 12.529 | 0.748  | 25.866 | 1.00 |
| 56.23      |     |     | H   |     |        |        |        |      |
| ATOM       | 155 | N   | CYS | 14  | 13.737 | 3.130  | 22.241 | 1.00 |
| 9.12       |     |     | N   |     |        |        |        |      |
| ATOM       | 156 | CA  | CYS | 14  | 14.392 | 3.833  | 21.134 | 1.00 |
| 10.69      |     |     | C   |     |        |        |        |      |
| ATOM       | 157 | C   | CYS | 14  | 15.825 | 3.344  | 20.970 | 1.00 |
| 9.56       |     |     | C   |     |        |        |        |      |
| ATOM       | 158 | O   | CYS | 14  | 16.428 | 2.849  | 21.918 | 1.00 |
| 13.62      |     |     | O   |     |        |        |        |      |
| ATOM       | 159 | CB  | CYS | 14  | 14.402 | 5.340  | 21.404 | 1.00 |
| 13.96      |     |     | C   |     |        |        |        |      |
| ATOM       | 160 | SG  | CYS | 14  | 15.288 | 6.185  | 20.066 | 1.00 |
| 42.96      |     |     | S   |     |        |        |        |      |
| ATOM       | 161 | HN  | CYS | 14  | 14.017 | 3.328  | 23.160 | 1.00 |
| 9.76       |     |     | H   |     |        |        |        |      |
| ATOM       | 162 | HA  | CYS | 14  | 13.853 | 3.648  | 20.215 | 1.00 |
| 15.54      |     |     | H   |     |        |        |        |      |
| ATOM       | 163 | HB1 | CYS | 14  | 14.897 | 5.535  | 22.343 | 1.00 |
| 50.72      |     |     | H   |     |        |        |        |      |
| ATOM       | 164 | HB2 | CYS | 14  | 13.387 | 5.704  | 21.450 | 1.00 |
| 46.13      |     |     | H   |     |        |        |        |      |
| ATOM       | 165 | N   | CYS | 15  | 16.364 | 3.490  | 19.761 | 1.00 |
| 9.60       |     |     | N   |     |        |        |        |      |
| ATOM       | 166 | CA  | CYS | 15  | 17.735 | 3.065  | 19.479 | 1.00 |
| 9.28       |     |     | C   |     |        |        |        |      |
| ATOM       | 167 | C   | CYS | 15  | 18.332 | 3.956  | 18.395 | 1.00 |
| 9.92       |     |     | C   |     |        |        |        |      |
| ATOM       | 168 | O   | CYS | 15  | 17.724 | 4.153  | 17.343 | 1.00 |
| 13.31      |     |     | O   |     |        |        |        |      |
| ATOM       | 169 | CB  | CYS | 15  | 17.747 | 1.607  | 19.011 | 1.00 |
| 12.90      |     |     | C   |     |        |        |        |      |
| ATOM       | 170 | SG  | CYS | 15  | 19.430 | 0.941  | 19.128 | 1.00 |
| 39.11      |     |     | S   |     |        |        |        |      |
| ATOM       | 171 | HN  | CYS | 15  | 15.832 | 3.896  | 19.045 | 1.00 |
| 13.12      |     |     | H   |     |        |        |        |      |
| ATOM       | 172 | HA  | CYS | 15  | 18.332 | 3.155  | 20.376 | 1.00 |
| 8.26       |     |     | H   |     |        |        |        |      |
| ATOM       | 173 | HB1 | CYS | 15  | 17.412 | 1.555  | 17.984 | 1.00 |
| 24.82      |     |     | H   |     |        |        |        |      |

|            |     |      |     |    |        |       |        |      |
|------------|-----|------|-----|----|--------|-------|--------|------|
| ATOM       | 174 | HB2  | CYS | 15 | 17.085 | 1.024 | 19.632 | 1.00 |
| 27.31      |     | H    |     |    |        |       |        |      |
| ATOM       | 175 | N    | VAL | 16 | 19.522 | 4.497 | 18.651 | 1.00 |
| 9.56       |     | N    |     |    |        |       |        |      |
| ATOM       | 176 | CA   | VAL | 16 | 20.176 | 5.366 | 17.677 | 1.00 |
| 11.99      |     | C    |     |    |        |       |        |      |
| ATOM       | 177 | C    | VAL | 16 | 21.690 | 5.230 | 17.773 | 1.00 |
| 7.73       |     | C    |     |    |        |       |        |      |
| ATOM       | 178 | O    | VAL | 16 | 22.260 | 5.278 | 18.863 | 1.00 |
| 8.83       |     | O    |     |    |        |       |        |      |
| ATOM       | 179 | CB   | VAL | 16 | 19.775 | 6.820 | 17.931 | 1.00 |
| 18.37      |     | C    |     |    |        |       |        |      |
| ATOM       | 180 | CG1  | VAL | 16 | 20.342 | 7.283 | 19.275 | 1.00 |
| 39.61      |     | C    |     |    |        |       |        |      |
| ATOM       | 181 | CG2  | VAL | 16 | 20.325 | 7.705 | 16.811 |      |
| 1.00115.21 |     |      |     |    |        |       |        | C    |
| ATOM       | 182 | HN   | VAL | 16 | 19.966 | 4.309 | 19.507 | 1.00 |
| 9.76       |     | H    |     |    |        |       |        |      |
| ATOM       | 183 | HA   | VAL | 16 | 19.865 | 5.090 | 16.680 | 1.00 |
| 17.27      |     | H    |     |    |        |       |        |      |
| ATOM       | 184 | HB   | VAL | 16 | 18.696 | 6.896 | 17.953 | 1.00 |
| 52.63      |     | H    |     |    |        |       |        |      |
| ATOM       | 185 | HG11 | VAL | 16 | 19.855 | 8.198 | 19.575 |      |
| 1.00128.07 |     |      |     |    |        |       |        | H    |
| ATOM       | 186 | HG12 | VAL | 16 | 21.405 | 7.455 | 19.177 |      |
| 1.00154.13 |     |      |     |    |        |       |        | H    |
| ATOM       | 187 | HG13 | VAL | 16 | 20.169 | 6.521 | 20.021 |      |
| 1.00135.74 |     |      |     |    |        |       |        | H    |
| ATOM       | 188 | HG21 | VAL | 16 | 20.031 | 8.730 | 16.985 |      |
| 1.00229.05 |     |      |     |    |        |       |        | H    |
| ATOM       | 189 | HG22 | VAL | 16 | 19.930 | 7.372 | 15.863 |      |
| 1.00261.82 |     |      |     |    |        |       |        | H    |
| ATOM       | 190 | HG23 | VAL | 16 | 21.402 | 7.637 | 16.795 |      |
| 1.00210.07 |     |      |     |    |        |       |        | H    |
| ATOM       | 191 | N    | ASP | 17 | 22.338 | 5.061 | 16.620 | 1.00 |
| 14.34      |     | N    |     |    |        |       |        |      |
| ATOM       | 192 | CA   | ASP | 17 | 23.793 | 4.917 | 16.576 | 1.00 |
| 11.90      |     | C    |     |    |        |       |        |      |
| ATOM       | 193 | C    | ASP | 17 | 24.444 | 6.217 | 16.119 | 1.00 |
| 13.15      |     | C    |     |    |        |       |        |      |
| ATOM       | 194 | O    | ASP | 17 | 24.202 | 6.687 | 15.008 | 1.00 |
| 25.96      |     | O    |     |    |        |       |        |      |
| ATOM       | 195 | CB   | ASP | 17 | 24.178 | 3.796 | 15.610 | 1.00 |
| 20.80      |     | C    |     |    |        |       |        |      |
| ATOM       | 196 | CG   | ASP | 17 | 23.791 | 2.443 | 16.200 | 1.00 |
| 28.72      |     | C    |     |    |        |       |        |      |
| ATOM       | 197 | OD1  | ASP | 17 | 23.799 | 1.473 | 15.460 |      |
| 1.00135.42 |     |      |     |    |        |       |        | O    |
| ATOM       | 198 | OD2  | ASP | 17 | 23.492 | 2.399 | 17.381 |      |
| 1.00114.17 |     |      |     |    |        |       |        | O1-  |
| ATOM       | 199 | HN   | ASP | 17 | 21.828 | 5.031 | 15.785 | 1.00 |
| 28.29      |     | H    |     |    |        |       |        |      |



|            |     |      |     |    |        |        |        |      |
|------------|-----|------|-----|----|--------|--------|--------|------|
| ATOM       | 200 | HA   | ASP | 17 | 24.164 | 4.667  | 17.562 | 1.00 |
| 10.49      |     |      | H   |    |        |        |        |      |
| ATOM       | 201 | HB1  | ASP | 17 | 25.243 | 3.819  | 15.441 | 1.00 |
| 22.42      |     |      | H   |    |        |        |        |      |
| ATOM       | 202 | HB2  | ASP | 17 | 23.662 | 3.939  | 14.671 | 1.00 |
| 29.52      |     |      | H   |    |        |        |        |      |
| ATOM       | 203 | N    | THR | 18 | 25.282 | 6.786  | 16.982 | 1.00 |
| 11.55      |     |      | N   |    |        |        |        |      |
| ATOM       | 204 | CA   | THR | 18 | 25.986 | 8.030  | 16.664 | 1.00 |
| 17.10      |     |      | C   |    |        |        |        |      |
| ATOM       | 205 | C    | THR | 18 | 27.447 | 7.736  | 16.362 | 1.00 |
| 10.63      |     |      | C   |    |        |        |        |      |
| ATOM       | 206 | O    | THR | 18 | 27.953 | 6.667  | 16.698 | 1.00 |
| 6.49       |     |      | O   |    |        |        |        |      |
| ATOM       | 207 | CB   | THR | 18 | 25.899 | 9.000  | 17.844 | 1.00 |
| 28.52      |     |      | C   |    |        |        |        |      |
| ATOM       | 208 | CG2  | THR | 18 | 24.475 | 9.538  | 17.967 | 1.00 |
| 45.38      |     |      | C   |    |        |        |        |      |
| ATOM       | 209 | OG1  | THR | 18 | 26.263 | 8.324  | 19.037 | 1.00 |
| 26.49      |     |      | O   |    |        |        |        |      |
| ATOM       | 210 | HN   | THR | 18 | 25.439 | 6.356  | 17.848 | 1.00 |
| 13.96      |     |      | H   |    |        |        |        |      |
| ATOM       | 211 | HA   | THR | 18 | 25.533 | 8.494  | 15.798 | 1.00 |
| 26.43      |     |      | H   |    |        |        |        |      |
| ATOM       | 212 | HB   | THR | 18 | 26.576 | 9.824  | 17.679 | 1.00 |
| 37.43      |     |      | H   |    |        |        |        |      |
| ATOM       | 213 | HG1  | THR | 18 | 25.891 | 8.809  | 19.777 | 1.00 |
| 71.62      |     |      | H   |    |        |        |        |      |
| ATOM       | 214 | HG21 | THR | 18 | 24.397 | 10.143 | 18.859 |      |
| 1.00100.44 |     |      | H   |    |        |        |        |      |
| ATOM       | 215 | HG22 | THR | 18 | 23.782 | 8.712  | 18.030 |      |
| 1.00129.42 |     |      | H   |    |        |        |        |      |
| ATOM       | 216 | HG23 | THR | 18 | 24.242 | 10.140 | 17.102 |      |
| 1.00156.21 |     |      | H   |    |        |        |        |      |
| ATOM       | 217 | N    | VAL | 19 | 28.119 | 8.698  | 15.740 | 1.00 |
| 16.32      |     |      | N   |    |        |        |        |      |
| ATOM       | 218 | CA   | VAL | 19 | 29.515 | 8.559  | 15.402 | 1.00 |
| 13.34      |     |      | C   |    |        |        |        |      |
| ATOM       | 219 | C    | VAL | 19 | 29.975 | 9.803  | 14.669 | 1.00 |
| 25.88      |     |      | C   |    |        |        |        |      |
| ATOM       | 220 | O    | VAL | 19 | 29.484 | 10.141 | 13.591 | 1.00 |
| 42.11      |     |      | O   |    |        |        |        |      |
| ATOM       | 221 | CB   | VAL | 19 | 29.773 | 7.322  | 14.543 | 1.00 |
| 15.48      |     |      | C   |    |        |        |        |      |
| ATOM       | 222 | CG1  | VAL | 19 | 28.816 | 7.297  | 13.347 | 1.00 |
| 29.06      |     |      | C   |    |        |        |        |      |
| ATOM       | 223 | CG2  | VAL | 19 | 31.223 | 7.359  | 14.041 | 1.00 |
| 20.67      |     |      | C   |    |        |        |        |      |
| ATOM       | 224 | HN   | VAL | 19 | 27.669 | 9.534  | 15.517 | 1.00 |
| 26.89      |     |      | H   |    |        |        |        |      |
| ATOM       | 225 | HA   | VAL | 19 | 30.083 | 8.469  | 16.317 | 1.00 |
| 8.08       |     |      | H   |    |        |        |        |      |

|            |     |      |     |    |        |        |        |      |
|------------|-----|------|-----|----|--------|--------|--------|------|
| ATOM       | 226 | HB   | VAL | 19 | 29.627 | 6.441  | 15.142 | 1.00 |
| 11.49      |     |      | H   |    |        |        |        |      |
| ATOM       | 227 | HG11 | VAL | 19 | 29.125 | 8.035  | 12.622 |      |
| 1.00137.43 |     |      | H   |    |        |        |        |      |
| ATOM       | 228 | HG12 | VAL | 19 | 27.813 | 7.515  | 13.681 | 1.00 |
| 93.29      |     |      | H   |    |        |        |        |      |
| ATOM       | 229 | HG13 | VAL | 19 | 28.837 | 6.317  | 12.892 |      |
| 1.00108.69 |     |      | H   |    |        |        |        |      |
| ATOM       | 230 | HG21 | VAL | 19 | 31.307 | 8.080  | 13.240 | 1.00 |
| 99.42      |     |      | H   |    |        |        |        |      |
| ATOM       | 231 | HG22 | VAL | 19 | 31.506 | 6.383  | 13.680 |      |
| 1.00111.36 |     |      | H   |    |        |        |        |      |
| ATOM       | 232 | HG23 | VAL | 19 | 31.877 | 7.650  | 14.853 | 1.00 |
| 77.11      |     |      | H   |    |        |        |        |      |
| ATOM       | 233 | N    | PHE | 20 | 30.909 | 10.478 | 15.290 | 1.00 |
| 24.58      |     |      | N   |    |        |        |        |      |
| ATOM       | 234 | CA   | PHE | 20 | 31.468 | 11.711 | 14.760 | 1.00 |
| 40.34      |     |      | C   |    |        |        |        |      |
| ATOM       | 235 | C    | PHE | 20 | 32.847 | 11.477 | 14.169 | 1.00 |
| 40.37      |     |      | C   |    |        |        |        |      |
| ATOM       | 236 | O    | PHE | 20 | 33.073 | 11.708 | 12.981 | 1.00 |
| 66.02      |     |      | O   |    |        |        |        |      |
| ATOM       | 237 | CB   | PHE | 20 | 31.559 | 12.746 | 15.891 | 1.00 |
| 48.79      |     |      | C   |    |        |        |        |      |
| ATOM       | 238 | CG   | PHE | 20 | 31.912 | 12.076 | 17.211 | 1.00 |
| 35.75      |     |      | C   |    |        |        |        |      |
| ATOM       | 239 | CD1  | PHE | 20 | 31.000 | 11.209 | 17.846 | 1.00 |
| 30.20      |     |      | C   |    |        |        |        |      |
| ATOM       | 240 | CD2  | PHE | 20 | 33.150 | 12.339 | 17.814 | 1.00 |
| 40.95      |     |      | C   |    |        |        |        |      |
| ATOM       | 241 | CE1  | PHE | 20 | 31.333 | 10.616 | 19.066 | 1.00 |
| 30.41      |     |      | C   |    |        |        |        |      |
| ATOM       | 242 | CE2  | PHE | 20 | 33.477 | 11.740 | 19.036 | 1.00 |
| 45.84      |     |      | C   |    |        |        |        |      |
| ATOM       | 243 | CZ   | PHE | 20 | 32.571 | 10.879 | 19.661 | 1.00 |
| 40.81      |     |      | C   |    |        |        |        |      |
| ATOM       | 244 | HN   | PHE | 20 | 31.219 | 10.144 | 16.149 | 1.00 |
| 16.73      |     |      | H   |    |        |        |        |      |
| ATOM       | 245 | HA   | PHE | 20 | 30.820 | 12.100 | 13.985 | 1.00 |
| 59.91      |     |      | H   |    |        |        |        |      |
| ATOM       | 246 | HB1  | PHE | 20 | 30.616 | 13.227 | 15.991 | 1.00 |
| 67.15      |     |      | H   |    |        |        |        |      |
| ATOM       | 247 | HB2  | PHE | 20 | 32.306 | 13.488 | 15.651 | 1.00 |
| 58.17      |     |      | H   |    |        |        |        |      |
| ATOM       | 248 | HD1  | PHE | 20 | 30.040 | 10.994 | 17.396 | 1.00 |
| 33.34      |     |      | H   |    |        |        |        |      |
| ATOM       | 249 | HD2  | PHE | 20 | 33.853 | 13.001 | 17.334 | 1.00 |
| 49.35      |     |      | H   |    |        |        |        |      |
| ATOM       | 250 | HE1  | PHE | 20 | 30.632 | 9.951  | 19.548 | 1.00 |
| 30.61      |     |      | H   |    |        |        |        |      |
| ATOM       | 251 | HE2  | PHE | 20 | 34.432 | 11.943 | 19.496 | 1.00 |
| 61.27      |     |      | H   |    |        |        |        |      |

|            |     |     |     |    |        |        |        |      |
|------------|-----|-----|-----|----|--------|--------|--------|------|
| ATOM       | 252 | HZ  | PHE | 20 | 32.824 | 10.419 | 20.603 | 1.00 |
| 52.66      |     |     | H   |    |        |        |        |      |
| ATOM       | 253 | N   | GLU | 21 | 33.778 | 11.057 | 15.016 | 1.00 |
| 41.31      |     |     | N   |    |        |        |        |      |
| ATOM       | 254 | CA  | GLU | 21 | 35.143 | 10.839 | 14.595 | 1.00 |
| 56.16      |     |     | C   |    |        |        |        |      |
| ATOM       | 255 | C   | GLU | 21 | 35.462 | 9.360  | 14.448 | 1.00 |
| 58.61      |     |     | C   |    |        |        |        |      |
| ATOM       | 256 | O   | GLU | 21 | 34.606 | 8.497  | 14.645 |      |
| 1.00201.19 |     |     | O   |    |        |        |        |      |
| ATOM       | 257 | CB  | GLU | 21 | 36.040 | 11.472 | 15.635 | 1.00 |
| 57.37      |     |     | C   |    |        |        |        |      |
| ATOM       | 258 | CG  | GLU | 21 | 35.957 | 10.693 | 16.950 |      |
| 1.00193.56 |     |     | C   |    |        |        |        |      |
| ATOM       | 259 | CD  | GLU | 21 | 36.664 | 11.472 | 18.055 |      |
| 1.00304.62 |     |     | C   |    |        |        |        |      |
| ATOM       | 260 | OE1 | GLU | 21 | 36.577 | 11.055 | 19.198 |      |
| 1.00451.81 |     |     | O   |    |        |        |        |      |
| ATOM       | 261 | OE2 | GLU | 21 | 37.284 | 12.476 | 17.741 |      |
| 1.00442.88 |     |     | O1- |    |        |        |        |      |
| ATOM       | 262 | HN  | GLU | 21 | 33.553 | 10.923 | 15.955 | 1.00 |
| 50.82      |     |     | H   |    |        |        |        |      |
| ATOM       | 263 | HA  | GLU | 21 | 35.319 | 11.330 | 13.647 | 1.00 |
| 85.72      |     |     | H   |    |        |        |        |      |
| ATOM       | 264 | HB1 | GLU | 21 | 35.705 | 12.480 | 15.800 | 1.00 |
| 46.37      |     |     | H   |    |        |        |        |      |
| ATOM       | 265 | HB2 | GLU | 21 | 37.051 | 11.477 | 15.280 |      |
| 1.00131.81 |     |     | H   |    |        |        |        |      |
| ATOM       | 266 | HG1 | GLU | 21 | 36.430 | 9.734  | 16.831 |      |
| 1.00314.91 |     |     | H   |    |        |        |        |      |
| ATOM       | 267 | HG2 | GLU | 21 | 34.922 | 10.549 | 17.216 |      |
| 1.00266.92 |     |     | H   |    |        |        |        |      |
| ATOM       | 268 | N   | GLY | 22 | 36.707 | 9.088  | 14.089 | 1.00 |
| 86.70      |     |     | N   |    |        |        |        |      |
| ATOM       | 269 | CA  | GLY | 22 | 37.172 | 7.713  | 13.893 |      |
| 1.00104.66 |     |     | C   |    |        |        |        |      |
| ATOM       | 270 | C   | GLY | 22 | 37.805 | 7.154  | 15.163 | 1.00 |
| 71.50      |     |     | C   |    |        |        |        |      |
| ATOM       | 271 | O   | GLY | 22 | 38.088 | 5.959  | 15.253 | 1.00 |
| 89.87      |     |     | O   |    |        |        |        |      |
| ATOM       | 272 | HN  | GLY | 22 | 37.328 | 9.836  | 13.949 |      |
| 1.00214.64 |     |     | H   |    |        |        |        |      |
| ATOM       | 273 | HA1 | GLY | 22 | 37.906 | 7.699  | 13.102 |      |
| 1.00152.47 |     |     | H   |    |        |        |        |      |
| ATOM       | 274 | HA2 | GLY | 22 | 36.337 | 7.087  | 13.609 |      |
| 1.00118.15 |     |     | H   |    |        |        |        |      |
| ATOM       | 275 | N   | ASP | 23 | 38.029 | 8.024  | 16.139 | 1.00 |
| 44.68      |     |     | N   |    |        |        |        |      |
| ATOM       | 276 | CA  | ASP | 23 | 38.634 | 7.608  | 17.398 | 1.00 |
| 43.33      |     |     | C   |    |        |        |        |      |
| ATOM       | 277 | C   | ASP | 23 | 37.770 | 6.564  | 18.096 | 1.00 |
| 37.55      |     |     | C   |    |        |        |        |      |

|            |     |     |     |    |        |        |        |      |
|------------|-----|-----|-----|----|--------|--------|--------|------|
| ATOM       | 278 | O   | ASP | 23 | 38.278 | 5.565  | 18.608 | 1.00 |
| 61.37      |     | O   |     |    |        |        |        |      |
| ATOM       | 279 | CB  | ASP | 23 | 38.807 | 8.818  | 18.313 | 1.00 |
| 40.74      |     | C   |     |    |        |        |        |      |
| ATOM       | 280 | CG  | ASP | 23 | 39.589 | 8.421  | 19.561 |      |
| 1.00141.86 |     | C   |     |    |        |        |        |      |
| ATOM       | 281 | OD1 | ASP | 23 | 39.968 | 9.309  | 20.307 |      |
| 1.00328.18 |     | O   |     |    |        |        |        |      |
| ATOM       | 282 | OD2 | ASP | 23 | 39.799 | 7.235  | 19.754 |      |
| 1.00304.58 |     | O1- |     |    |        |        |        |      |
| ATOM       | 283 | HN  | ASP | 23 | 37.788 | 8.964  | 16.008 | 1.00 |
| 40.86      |     | H   |     |    |        |        |        |      |
| ATOM       | 284 | HA  | ASP | 23 | 39.601 | 7.183  | 17.195 | 1.00 |
| 72.12      |     | H   |     |    |        |        |        |      |
| ATOM       | 285 | HB1 | ASP | 23 | 37.835 | 9.184  | 18.604 | 1.00 |
| 94.15      |     | H   |     |    |        |        |        |      |
| ATOM       | 286 | HB2 | ASP | 23 | 39.340 | 9.594  | 17.786 | 1.00 |
| 93.26      |     | H   |     |    |        |        |        |      |
| ATOM       | 287 | N   | MET | 24 | 36.468 | 6.806  | 18.116 | 1.00 |
| 23.24      |     | N   |     |    |        |        |        |      |
| ATOM       | 288 | CA  | MET | 24 | 35.537 | 5.882  | 18.759 | 1.00 |
| 32.50      |     | C   |     |    |        |        |        |      |
| ATOM       | 289 | C   | MET | 24 | 34.117 | 6.093  | 18.245 | 1.00 |
| 25.13      |     | C   |     |    |        |        |        |      |
| ATOM       | 290 | O   | MET | 24 | 33.832 | 7.074  | 17.559 | 1.00 |
| 54.40      |     | O   |     |    |        |        |        |      |
| ATOM       | 291 | CB  | MET | 24 | 35.572 | 6.082  | 20.276 | 1.00 |
| 47.36      |     | C   |     |    |        |        |        |      |
| ATOM       | 292 | CG  | MET | 24 | 35.140 | 7.510  | 20.617 |      |
| 1.00151.73 |     | C   |     |    |        |        |        |      |
| ATOM       | 293 | SD  | MET | 24 | 35.317 | 7.783  | 22.398 |      |
| 1.00209.23 |     | S   |     |    |        |        |        |      |
| ATOM       | 294 | CE  | MET | 24 | 34.729 | 9.494  | 22.427 |      |
| 1.00243.29 |     | C   |     |    |        |        |        |      |
| ATOM       | 295 | HN  | MET | 24 | 36.125 | 7.619  | 17.692 | 1.00 |
| 17.32      |     | H   |     |    |        |        |        |      |
| ATOM       | 296 | HA  | MET | 24 | 35.841 | 4.869  | 18.538 | 1.00 |
| 48.94      |     | H   |     |    |        |        |        |      |
| ATOM       | 297 | HB1 | MET | 24 | 36.575 | 5.916  | 20.639 |      |
| 1.00124.40 |     | H   |     |    |        |        |        |      |
| ATOM       | 298 | HB2 | MET | 24 | 34.898 | 5.380  | 20.745 |      |
| 1.00166.96 |     | H   |     |    |        |        |        |      |
| ATOM       | 299 | HG1 | MET | 24 | 34.108 | 7.652  | 20.333 |      |
| 1.00331.71 |     | H   |     |    |        |        |        |      |
| ATOM       | 300 | HG2 | MET | 24 | 35.762 | 8.212  | 20.081 |      |
| 1.00302.30 |     | H   |     |    |        |        |        |      |
| ATOM       | 301 | HE1 | MET | 24 | 34.954 | 9.968  | 21.482 |      |
| 1.00340.44 |     | H   |     |    |        |        |        |      |
| ATOM       | 302 | HE2 | MET | 24 | 35.219 | 10.032 | 23.223 |      |
| 1.00373.88 |     | H   |     |    |        |        |        |      |
| ATOM       | 303 | HE3 | MET | 24 | 33.659 | 9.502  | 22.594 |      |
| 1.00386.81 |     | H   |     |    |        |        |        |      |

|            |     |      |     |    |        |       |        |      |
|------------|-----|------|-----|----|--------|-------|--------|------|
| ATOM       | 304 | N    | VAL | 25 | 33.227 | 5.159 | 18.584 | 1.00 |
| 22.44      |     |      | N   |    |        |       |        |      |
| ATOM       | 305 | CA   | VAL | 25 | 31.824 | 5.229 | 18.162 | 1.00 |
| 15.37      |     |      | C   |    |        |       |        |      |
| ATOM       | 306 | C    | VAL | 25 | 30.905 | 5.324 | 19.374 | 1.00 |
| 17.47      |     |      | C   |    |        |       |        |      |
| ATOM       | 307 | O    | VAL | 25 | 31.164 | 4.723 | 20.416 | 1.00 |
| 29.52      |     |      | O   |    |        |       |        |      |
| ATOM       | 308 | CB   | VAL | 25 | 31.462 | 3.993 | 17.334 | 1.00 |
| 23.36      |     |      | C   |    |        |       |        |      |
| ATOM       | 309 | CG1  | VAL | 25 | 29.945 | 3.974 | 17.059 | 1.00 |
| 58.39      |     |      | C   |    |        |       |        |      |
| ATOM       | 310 | CG2  | VAL | 25 | 32.227 | 4.035 | 16.007 | 1.00 |
| 55.25      |     |      | C   |    |        |       |        |      |
| ATOM       | 311 | HN   | VAL | 25 | 33.520 | 4.403 | 19.134 | 1.00 |
| 48.11      |     |      | H   |    |        |       |        |      |
| ATOM       | 312 | HA   | VAL | 25 | 31.676 | 6.114 | 17.549 | 1.00 |
| 9.25       |     |      | H   |    |        |       |        |      |
| ATOM       | 313 | HB   | VAL | 25 | 31.736 | 3.103 | 17.880 | 1.00 |
| 52.45      |     |      | H   |    |        |       |        |      |
| ATOM       | 314 | HG11 | VAL | 25 | 29.740 | 3.396 | 16.169 |      |
| 1.00171.07 |     |      | H   |    |        |       |        |      |
| ATOM       | 315 | HG12 | VAL | 25 | 29.587 | 4.985 | 16.923 |      |
| 1.00166.22 |     |      | H   |    |        |       |        |      |
| ATOM       | 316 | HG13 | VAL | 25 | 29.435 | 3.528 | 17.900 |      |
| 1.00134.76 |     |      | H   |    |        |       |        |      |
| ATOM       | 317 | HG21 | VAL | 25 | 31.948 | 3.184 | 15.403 |      |
| 1.00141.88 |     |      | H   |    |        |       |        |      |
| ATOM       | 318 | HG22 | VAL | 25 | 33.289 | 4.004 | 16.203 |      |
| 1.00184.50 |     |      | H   |    |        |       |        |      |
| ATOM       | 319 | HG23 | VAL | 25 | 31.985 | 4.945 | 15.480 |      |
| 1.00133.90 |     |      | H   |    |        |       |        |      |
| ATOM       | 320 | N    | THR | 26 | 29.835 | 6.101 | 19.224 | 1.00 |
| 13.60      |     |      | N   |    |        |       |        |      |
| ATOM       | 321 | CA   | THR | 26 | 28.866 | 6.308 | 20.300 | 1.00 |
| 21.19      |     |      | C   |    |        |       |        |      |
| ATOM       | 322 | C    | THR | 26 | 27.480 | 5.805 | 19.897 | 1.00 |
| 16.55      |     |      | C   |    |        |       |        |      |
| ATOM       | 323 | O    | THR | 26 | 27.030 | 6.026 | 18.772 | 1.00 |
| 11.43      |     |      | O   |    |        |       |        |      |
| ATOM       | 324 | CB   | THR | 26 | 28.792 | 7.797 | 20.617 | 1.00 |
| 27.07      |     |      | C   |    |        |       |        |      |
| ATOM       | 325 | CG2  | THR | 26 | 27.757 | 8.043 | 21.715 | 1.00 |
| 44.39      |     |      | C   |    |        |       |        |      |
| ATOM       | 326 | OG1  | THR | 26 | 30.068 | 8.245 | 21.054 | 1.00 |
| 34.75      |     |      | O   |    |        |       |        |      |
| ATOM       | 327 | HN   | THR | 26 | 29.698 | 6.558 | 18.368 | 1.00 |
| 10.81      |     |      | H   |    |        |       |        |      |
| ATOM       | 328 | HA   | THR | 26 | 29.185 | 5.780 | 21.188 | 1.00 |
| 33.16      |     |      | H   |    |        |       |        |      |
| ATOM       | 329 | HB   | THR | 26 | 28.508 | 8.335 | 19.722 | 1.00 |
| 20.60      |     |      | H   |    |        |       |        |      |

|            |     |      |     |    |        |        |        |      |
|------------|-----|------|-----|----|--------|--------|--------|------|
| ATOM       | 330 | HG1  | THR | 26 | 30.415 | 7.594  | 21.669 | 1.00 |
| 77.72      |     |      | H   |    |        |        |        |      |
| ATOM       | 331 | HG21 | THR | 26 | 27.908 | 9.024  | 22.137 |      |
| 1.00126.99 |     |      | H   |    |        |        |        |      |
| ATOM       | 332 | HG22 | THR | 26 | 27.869 | 7.300  | 22.490 |      |
| 1.00108.32 |     |      | H   |    |        |        |        |      |
| ATOM       | 333 | HG23 | THR | 26 | 26.763 | 7.980  | 21.298 |      |
| 1.00151.99 |     |      | H   |    |        |        |        |      |
| ATOM       | 334 | N    | ARG | 27 | 26.805 | 5.130  | 20.827 | 1.00 |
| 22.38      |     |      | N   |    |        |        |        |      |
| ATOM       | 335 | CA   | ARG | 27 | 25.465 | 4.595  | 20.572 | 1.00 |
| 20.21      |     |      | C   |    |        |        |        |      |
| ATOM       | 336 | C    | ARG | 27 | 24.631 | 4.635  | 21.851 | 1.00 |
| 16.96      |     |      | C   |    |        |        |        |      |
| ATOM       | 337 | O    | ARG | 27 | 25.175 | 4.745  | 22.949 | 1.00 |
| 20.06      |     |      | O   |    |        |        |        |      |
| ATOM       | 338 | CB   | ARG | 27 | 25.568 | 3.155  | 20.065 | 1.00 |
| 22.14      |     |      | C   |    |        |        |        |      |
| ATOM       | 339 | CG   | ARG | 27 | 26.139 | 2.261  | 21.169 |      |
| 1.00124.30 |     |      | C   |    |        |        |        |      |
| ATOM       | 340 | CD   | ARG | 27 | 26.465 | 0.882  | 20.592 |      |
| 1.00109.38 |     |      | C   |    |        |        |        |      |
| ATOM       | 341 | NE   | ARG | 27 | 26.995 | 0.011  | 21.637 |      |
| 1.00227.73 |     |      | N   |    |        |        |        |      |
| ATOM       | 342 | CZ   | ARG | 27 | 27.504 | -1.181 | 21.345 |      |
| 1.00426.12 |     |      | C   |    |        |        |        |      |
| ATOM       | 343 | NH1  | ARG | 27 | 27.965 | -1.943 | 22.297 |      |
| 1.00767.09 |     |      | N1+ |    |        |        |        |      |
| ATOM       | 344 | NH2  | ARG | 27 | 27.543 | -1.587 | 20.105 |      |
| 1.00581.78 |     |      | N   |    |        |        |        |      |
| ATOM       | 345 | HN   | ARG | 27 | 27.216 | 4.988  | 21.705 | 1.00 |
| 30.75      |     |      | H   |    |        |        |        |      |
| ATOM       | 346 | HA   | ARG | 27 | 24.977 | 5.198  | 19.819 | 1.00 |
| 23.13      |     |      | H   |    |        |        |        |      |
| ATOM       | 347 | HB1  | ARG | 27 | 26.220 | 3.122  | 19.205 | 1.00 |
| 87.46      |     |      | H   |    |        |        |        |      |
| ATOM       | 348 | HB2  | ARG | 27 | 24.586 | 2.800  | 19.787 |      |
| 1.00103.36 |     |      | H   |    |        |        |        |      |
| ATOM       | 349 | HG1  | ARG | 27 | 25.413 | 2.154  | 21.960 |      |
| 1.00281.97 |     |      | H   |    |        |        |        |      |
| ATOM       | 350 | HG2  | ARG | 27 | 27.038 | 2.708  | 21.565 |      |
| 1.00276.19 |     |      | H   |    |        |        |        |      |
| ATOM       | 351 | HD1  | ARG | 27 | 27.198 | 0.989  | 19.806 |      |
| 1.00183.60 |     |      | H   |    |        |        |        |      |
| ATOM       | 352 | HD2  | ARG | 27 | 25.567 | 0.444  | 20.185 |      |
| 1.00142.93 |     |      | H   |    |        |        |        |      |
| ATOM       | 353 | HE   | ARG | 27 | 26.973 | 0.311  | 22.569 |      |
| 1.00372.53 |     |      | H   |    |        |        |        |      |
| ATOM       | 354 | HH11 | ARG | 27 | 27.937 | -1.630 | 23.247 |      |
| 1.00910.59 |     |      | H   |    |        |        |        |      |
| ATOM       | 355 | HH12 | ARG | 27 | 28.349 | -2.841 | 22.078 |      |
| 1.00999.99 |     |      | H   |    |        |        |        |      |

|      |         |      |     |    |        |        |        |      |
|------|---------|------|-----|----|--------|--------|--------|------|
| ATOM | 356     | HH21 | ARG | 27 | 27.191 | -1.003 | 19.375 |      |
|      | 1.00532 |      |     |    |        |        |        | H    |
| ATOM | 357     | HH22 | ARG | 27 | 27.926 | -2.485 | 19.886 |      |
|      | 1.00948 |      |     |    |        |        |        | H    |
| ATOM | 358     | N    | SER | 28 | 23.307 | 4.549  | 21.707 | 1.00 |
|      | 14.60   |      | N   |    |        |        |        |      |
| ATOM | 359     | CA   | SER | 28 | 22.419 | 4.582  | 22.869 | 1.00 |
|      | 14.92   |      | C   |    |        |        |        |      |
| ATOM | 360     | C    | SER | 28 | 21.131 | 3.815  | 22.590 | 1.00 |
|      | 12.12   |      | C   |    |        |        |        |      |
| ATOM | 361     | O    | SER | 28 | 20.795 | 3.543  | 21.438 | 1.00 |
|      | 13.41   |      | O   |    |        |        |        |      |
| ATOM | 362     | CB   | SER | 28 | 22.080 | 6.031  | 23.222 | 1.00 |
|      | 23.26   |      | C   |    |        |        |        |      |
| ATOM | 363     | OG   | SER | 28 | 21.310 | 6.602  | 22.173 |      |
|      | 1.00146 |      |     |    |        |        |        | O    |
| ATOM | 364     | HN   | SER | 28 | 22.921 | 4.465  | 20.808 | 1.00 |
|      | 15.23   |      | H   |    |        |        |        |      |
| ATOM | 365     | HA   | SER | 28 | 22.918 | 4.128  | 23.711 | 1.00 |
|      | 15.44   |      | H   |    |        |        |        |      |
| ATOM | 366     | HB1  | SER | 28 | 22.998 | 6.591  | 23.354 | 1.00 |
|      | 88.73   |      | H   |    |        |        |        |      |
| ATOM | 367     | HB2  | SER | 28 | 21.511 | 6.058  | 24.135 |      |
|      | 1.00124 |      |     |    |        |        |        | H    |
| ATOM | 368     | HG   | SER | 28 | 20.401 | 6.311  | 22.281 |      |
|      | 1.00242 |      |     |    |        |        |        | H    |
| ATOM | 369     | N    | CYS | 29 | 20.412 | 3.472  | 23.655 | 1.00 |
|      | 10.48   |      | N   |    |        |        |        |      |
| ATOM | 370     | CA   | CYS | 29 | 19.160 | 2.740  | 23.517 | 1.00 |
|      | 9.97    |      | C   |    |        |        |        |      |
| ATOM | 371     | C    | CYS | 29 | 18.411 | 2.729  | 24.848 | 1.00 |
|      | 11.60   |      | C   |    |        |        |        |      |
| ATOM | 372     | O    | CYS | 29 | 18.987 | 2.429  | 25.894 | 1.00 |
|      | 15.64   |      | O   |    |        |        |        |      |
| ATOM | 373     | CB   | CYS | 29 | 19.439 | 1.303  | 23.050 | 1.00 |
|      | 9.52    |      | C   |    |        |        |        |      |
| ATOM | 374     | SG   | CYS | 29 | 18.027 | 0.685  | 22.122 | 1.00 |
|      | 10.40   |      | S   |    |        |        |        |      |
| ATOM | 375     | HN   | CYS | 29 | 20.728 | 3.722  | 24.548 | 1.00 |
|      | 11.10   |      | H   |    |        |        |        |      |
| ATOM | 376     | HA   | CYS | 29 | 18.546 | 3.236  | 22.781 | 1.00 |
|      | 11.08   |      | H   |    |        |        |        |      |
| ATOM | 377     | HB1  | CYS | 29 | 19.605 | 0.657  | 23.901 | 1.00 |
|      | 9.33    |      | H   |    |        |        |        |      |
| ATOM | 378     | HB2  | CYS | 29 | 20.310 | 1.289  | 22.414 | 1.00 |
|      | 10.78   |      | H   |    |        |        |        |      |
| ATOM | 379     | N    | GLU | 30 | 17.128 | 3.066  | 24.801 | 1.00 |
|      | 13.52   |      | N   |    |        |        |        |      |
| ATOM | 380     | CA   | GLU | 30 | 16.311 | 3.100  | 26.008 | 1.00 |
|      | 17.41   |      | C   |    |        |        |        |      |
| ATOM | 381     | C    | GLU | 30 | 15.895 | 1.699  | 26.433 | 1.00 |
|      | 10.81   |      | C   |    |        |        |        |      |

|            |     |     |     |    |        |        |        |      |
|------------|-----|-----|-----|----|--------|--------|--------|------|
| ATOM       | 382 | O   | GLU | 30 | 15.803 | 0.788  | 25.610 | 1.00 |
| 23.22      |     |     | O   |    |        |        |        |      |
| ATOM       | 383 | CB  | GLU | 30 | 15.057 | 3.938  | 25.768 | 1.00 |
| 37.83      |     |     | C   |    |        |        |        |      |
| ATOM       | 384 | CG  | GLU | 30 | 15.457 | 5.371  | 25.430 |      |
| 1.00108.13 |     |     | C   |    |        |        |        |      |
| ATOM       | 385 | CD  | GLU | 30 | 16.042 | 6.049  | 26.665 |      |
| 1.00240.52 |     |     | C   |    |        |        |        |      |
| ATOM       | 386 | OE1 | GLU | 30 | 15.900 | 5.496  | 27.744 |      |
| 1.00422.56 |     |     | O   |    |        |        |        |      |
| ATOM       | 387 | OE2 | GLU | 30 | 16.623 | 7.112  | 26.516 |      |
| 1.00410.81 |     |     | O1- |    |        |        |        |      |
| ATOM       | 388 | HN  | GLU | 30 | 16.723 | 3.301  | 23.940 | 1.00 |
| 15.61      |     |     | H   |    |        |        |        |      |
| ATOM       | 389 | HA  | GLU | 30 | 16.882 | 3.551  | 26.804 | 1.00 |
| 24.60      |     |     | H   |    |        |        |        |      |
| ATOM       | 390 | HB1 | GLU | 30 | 14.447 | 3.938  | 26.660 | 1.00 |
| 72.67      |     |     | H   |    |        |        |        |      |
| ATOM       | 391 | HB2 | GLU | 30 | 14.494 | 3.519  | 24.948 | 1.00 |
| 56.47      |     |     | H   |    |        |        |        |      |
| ATOM       | 392 | HG1 | GLU | 30 | 14.587 | 5.914  | 25.102 |      |
| 1.00196.66 |     |     | H   |    |        |        |        |      |
| ATOM       | 393 | HG2 | GLU | 30 | 16.195 | 5.359  | 24.642 |      |
| 1.00140.67 |     |     | H   |    |        |        |        |      |
| ATOM       | 394 | N   | LYS | 31 | 15.628 | 1.543  | 27.727 | 1.00 |
| 11.96      |     |     | N   |    |        |        |        |      |
| ATOM       | 395 | CA  | LYS | 31 | 15.196 | 0.259  | 28.278 | 1.00 |
| 11.40      |     |     | C   |    |        |        |        |      |
| ATOM       | 396 | C   | LYS | 31 | 13.840 | 0.422  | 28.945 | 1.00 |
| 10.99      |     |     | C   |    |        |        |        |      |
| ATOM       | 397 | O   | LYS | 31 | 13.587 | 1.413  | 29.630 | 1.00 |
| 12.86      |     |     | O   |    |        |        |        |      |
| ATOM       | 398 | CB  | LYS | 31 | 16.205 | -0.242 | 29.309 | 1.00 |
| 21.40      |     |     | C   |    |        |        |        |      |
| ATOM       | 399 | CG  | LYS | 31 | 17.563 | -0.453 | 28.640 | 1.00 |
| 57.81      |     |     | C   |    |        |        |        |      |
| ATOM       | 400 | CD  | LYS | 31 | 18.563 | -0.981 | 29.668 |      |
| 1.00115.52 |     |     | C   |    |        |        |        |      |
| ATOM       | 401 | CE  | LYS | 31 | 19.917 | -1.211 | 28.993 |      |
| 1.00250.23 |     |     | C   |    |        |        |        |      |
| ATOM       | 402 | NZ  | LYS | 31 | 20.447 | 0.089  | 28.492 |      |
| 1.00462.10 |     |     | N1+ |    |        |        |        |      |
| ATOM       | 403 | HN  | LYS | 31 | 15.710 | 2.314  | 28.326 | 1.00 |
| 26.13      |     |     | H   |    |        |        |        |      |
| ATOM       | 404 | HA  | LYS | 31 | 15.114 | -0.473 | 27.485 | 1.00 |
| 13.87      |     |     | H   |    |        |        |        |      |
| ATOM       | 405 | HB1 | LYS | 31 | 15.861 | -1.178 | 29.722 | 1.00 |
| 37.63      |     |     | H   |    |        |        |        |      |
| ATOM       | 406 | HB2 | LYS | 31 | 16.298 | 0.486  | 30.099 | 1.00 |
| 47.19      |     |     | H   |    |        |        |        |      |
| ATOM       | 407 | HG1 | LYS | 31 | 17.920 | 0.487  | 28.244 |      |
| 1.00126.32 |     |     | H   |    |        |        |        |      |



|            |     |      |     |    |        |        |        |      |
|------------|-----|------|-----|----|--------|--------|--------|------|
| ATOM       | 408 | HG2  | LYS | 31 | 17.461 | -1.168 | 27.835 |      |
| 1.00114.19 |     |      |     |    |        |        |        | H    |
| ATOM       | 409 | HD1  | LYS | 31 | 18.203 | -1.916 | 30.073 |      |
| 1.00198.45 |     |      |     |    |        |        |        | H    |
| ATOM       | 410 | HD2  | LYS | 31 | 18.674 | -0.261 | 30.466 |      |
| 1.00200.14 |     |      |     |    |        |        |        | H    |
| ATOM       | 411 | HE1  | LYS | 31 | 19.795 | -1.894 | 28.166 |      |
| 1.00374.64 |     |      |     |    |        |        |        | H    |
| ATOM       | 412 | HE2  | LYS | 31 | 20.609 | -1.631 | 29.708 |      |
| 1.00403.27 |     |      |     |    |        |        |        | H    |
| ATOM       | 413 | HZ1  | LYS | 31 | 21.474 | 0.125  | 28.641 |      |
| 1.00627.38 |     |      |     |    |        |        |        | H    |
| ATOM       | 414 | HZ2  | LYS | 31 | 19.991 | 0.869  | 29.008 |      |
| 1.00622.26 |     |      |     |    |        |        |        | H    |
| ATOM       | 415 | HZ3  | LYS | 31 | 20.243 | 0.177  | 27.477 |      |
| 1.00619.20 |     |      |     |    |        |        |        | H    |
| ATOM       | 416 | N    | THR | 32 | 12.968 | -0.553 | 28.740 | 1.00 |
| 15.51      |     |      | N   |    |        |        |        |      |
| ATOM       | 417 | CA   | THR | 32 | 11.633 | -0.505 | 29.325 | 1.00 |
| 22.44      |     |      | C   |    |        |        |        |      |
| ATOM       | 418 | C    | THR | 32 | 11.673 | -0.933 | 30.789 | 1.00 |
| 26.60      |     |      | C   |    |        |        |        |      |
| ATOM       | 419 | O    | THR | 32 | 12.120 | -2.033 | 31.114 | 1.00 |
| 57.43      |     |      | O   |    |        |        |        |      |
| ATOM       | 420 | CB   | THR | 32 | 10.687 | -1.420 | 28.548 | 1.00 |
| 56.28      |     |      | C   |    |        |        |        |      |
| ATOM       | 421 | CG2  | THR | 32 | 9.305  | -1.404 | 29.200 |      |
| 1.00102.70 |     |      |     |    |        |        |        | C    |
| ATOM       | 422 | OG1  | THR | 32 | 10.587 | -0.962 | 27.206 |      |
| 1.00111.17 |     |      |     |    |        |        |        | O    |
| ATOM       | 423 | HN   | THR | 32 | 13.226 | -1.315 | 28.184 | 1.00 |
| 18.79      |     |      | H   |    |        |        |        |      |
| ATOM       | 424 | HA   | THR | 32 | 11.261 | 0.508  | 29.269 | 1.00 |
| 19.67      |     |      | H   |    |        |        |        |      |
| ATOM       | 425 | HB   | THR | 32 | 11.072 | -2.426 | 28.555 | 1.00 |
| 84.25      |     |      | H   |    |        |        |        |      |
| ATOM       | 426 | HG1  | THR | 32 | 10.548 | -1.730 | 26.633 |      |
| 1.00205.03 |     |      |     |    |        |        |        | H    |
| ATOM       | 427 | HG21 | THR | 32 | 8.593  | -1.890 | 28.549 |      |
| 1.00220.71 |     |      |     |    |        |        |        | H    |
| ATOM       | 428 | HG22 | THR | 32 | 8.997  | -0.383 | 29.370 |      |
| 1.00174.67 |     |      |     |    |        |        |        | H    |
| ATOM       | 429 | HG23 | THR | 32 | 9.345  | -1.929 | 30.143 |      |
| 1.00217.44 |     |      |     |    |        |        |        | H    |
| ATOM       | 430 | N    | THR | 33 | 11.198 | -0.054 | 31.665 | 1.00 |
| 22.47      |     |      | N   |    |        |        |        |      |
| ATOM       | 431 | CA   | THR | 33 | 11.176 | -0.341 | 33.095 | 1.00 |
| 41.60      |     |      | C   |    |        |        |        |      |
| ATOM       | 432 | C    | THR | 33 | 10.098 | 0.457  | 33.777 | 1.00 |
| 38.03      |     |      | C   |    |        |        |        |      |
| ATOM       | 433 | O    | THR | 33 | 10.332 | 1.555  | 34.280 | 1.00 |
| 52.73      |     |      | O   |    |        |        |        |      |

|            |     |      |     |    |        |        |        |      |
|------------|-----|------|-----|----|--------|--------|--------|------|
| ATOM       | 434 | CB   | THR | 33 | 12.531 | -0.025 | 33.730 | 1.00 |
| 63.25      |     |      | C   |    |        |        |        |      |
| ATOM       | 435 | CG2  | THR | 33 | 13.583 | -1.020 | 33.233 |      |
| 1.00121.65 |     |      | C   |    |        |        |        |      |
| ATOM       | 436 | OG1  | THR | 33 | 12.921 | 1.294  | 33.378 | 1.00 |
| 96.20      |     |      | O   |    |        |        |        |      |
| ATOM       | 437 | HN   | THR | 33 | 10.854 | 0.805  | 31.343 | 1.00 |
| 23.82      |     |      | H   |    |        |        |        |      |
| ATOM       | 438 | HA   | THR | 33 | 10.945 | -1.377 | 33.253 | 1.00 |
| 67.12      |     |      | H   |    |        |        |        |      |
| ATOM       | 439 | HB   | THR | 33 | 12.450 | -0.102 | 34.804 |      |
| 1.00107.59 |     |      | H   |    |        |        |        |      |
| ATOM       | 440 | HG1  | THR | 33 | 12.589 | 1.892  | 34.053 |      |
| 1.00176.27 |     |      | H   |    |        |        |        |      |
| ATOM       | 441 | HG21 | THR | 33 | 13.853 | -0.778 | 32.216 |      |
| 1.00255.23 |     |      | H   |    |        |        |        |      |
| ATOM       | 442 | HG22 | THR | 33 | 13.183 | -2.020 | 33.271 |      |
| 1.00245.37 |     |      | H   |    |        |        |        |      |
| ATOM       | 443 | HG23 | THR | 33 | 14.459 | -0.958 | 33.861 |      |
| 1.00185.78 |     |      | H   |    |        |        |        |      |
| ATOM       | 444 | N    | GLY | 34 | 8.911  | -0.125 | 33.806 | 1.00 |
| 40.93      |     |      | N   |    |        |        |        |      |
| ATOM       | 445 | CA   | GLY | 34 | 7.795  | 0.519  | 34.447 | 1.00 |
| 45.59      |     |      | C   |    |        |        |        |      |
| ATOM       | 446 | C    | GLY | 34 | 7.291  | 1.697  | 33.619 | 1.00 |
| 40.97      |     |      | C   |    |        |        |        |      |
| ATOM       | 447 | O    | GLY | 34 | 6.096  | 1.807  | 33.341 | 1.00 |
| 82.17      |     |      | O   |    |        |        |        |      |
| ATOM       | 448 | HN   | GLY | 34 | 8.796  | -1.008 | 33.401 | 1.00 |
| 54.00      |     |      | H   |    |        |        |        |      |
| ATOM       | 449 | HA1  | GLY | 34 | 8.127  | 0.872  | 35.404 | 1.00 |
| 54.41      |     |      | H   |    |        |        |        |      |
| ATOM       | 450 | HA2  | GLY | 34 | 6.997  | -0.196 | 34.582 | 1.00 |
| 62.09      |     |      | H   |    |        |        |        |      |
| ATOM       | 451 | N    | ASN | 35 | 8.213  | 2.575  | 33.223 | 1.00 |
| 32.51      |     |      | N   |    |        |        |        |      |
| ATOM       | 452 | CA   | ASN | 35 | 7.866  | 3.748  | 32.416 | 1.00 |
| 33.20      |     |      | C   |    |        |        |        |      |
| ATOM       | 453 | C    | ASN | 35 | 8.811  | 3.872  | 31.225 | 1.00 |
| 23.17      |     |      | C   |    |        |        |        |      |
| ATOM       | 454 | O    | ASN | 35 | 10.021 | 3.690  | 31.360 | 1.00 |
| 27.01      |     |      | O   |    |        |        |        |      |
| ATOM       | 455 | CB   | ASN | 35 | 7.958  | 5.012  | 33.272 | 1.00 |
| 54.51      |     |      | C   |    |        |        |        |      |
| ATOM       | 456 | CG   | ASN | 35 | 6.993  | 4.917  | 34.448 | 1.00 |
| 80.73      |     |      | C   |    |        |        |        |      |
| ATOM       | 457 | ND2  | ASN | 35 | 7.386  | 5.294  | 35.633 |      |
| 1.00220.46 |     |      | N   |    |        |        |        |      |
| ATOM       | 458 | OD1  | ASN | 35 | 5.851  | 4.488  | 34.283 |      |
| 1.00117.80 |     |      | O   |    |        |        |        |      |
| ATOM       | 459 | HN   | ASN | 35 | 9.148  | 2.429  | 33.472 | 1.00 |
| 51.15      |     |      | H   |    |        |        |        |      |

|            |     |      |     |    |        |        |        |      |
|------------|-----|------|-----|----|--------|--------|--------|------|
| ATOM       | 460 | HA   | ASN | 35 | 6.853  | 3.649  | 32.047 | 1.00 |
| 47.21      |     |      | H   |    |        |        |        |      |
| ATOM       | 461 | HB1  | ASN | 35 | 7.702  | 5.871  | 32.669 | 1.00 |
| 68.31      |     |      | H   |    |        |        |        |      |
| ATOM       | 462 | HB2  | ASN | 35 | 8.966  | 5.121  | 33.640 | 1.00 |
| 57.75      |     |      | H   |    |        |        |        |      |
| ATOM       | 463 | HD21 | ASN | 35 | 8.295  | 5.636  | 35.762 |      |
| 1.00405.39 |     |      | H   |    |        |        |        |      |
| ATOM       | 464 | HD22 | ASN | 35 | 6.772  | 5.237  | 36.395 |      |
| 1.00245.64 |     |      | H   |    |        |        |        |      |
| ATOM       | 465 | N    | PHE | 36 | 8.249  | 4.175  | 30.061 | 1.00 |
| 35.72      |     |      | N   |    |        |        |        |      |
| ATOM       | 466 | CA   | PHE | 36 | 9.036  | 4.318  | 28.848 | 1.00 |
| 33.41      |     |      | C   |    |        |        |        |      |
| ATOM       | 467 | C    | PHE | 36 | 9.629  | 5.722  | 28.758 | 1.00 |
| 28.51      |     |      | C   |    |        |        |        |      |
| ATOM       | 468 | O    | PHE | 36 | 9.049  | 6.682  | 29.267 | 1.00 |
| 45.23      |     |      | O   |    |        |        |        |      |
| ATOM       | 469 | CB   | PHE | 36 | 8.137  | 4.062  | 27.644 | 1.00 |
| 67.53      |     |      | C   |    |        |        |        |      |
| ATOM       | 470 | CG   | PHE | 36 | 7.604  | 2.650  | 27.708 | 1.00 |
| 86.71      |     |      | C   |    |        |        |        |      |
| ATOM       | 471 | CD1  | PHE | 36 | 6.406  | 2.388  | 28.383 |      |
| 1.00106.51 |     |      | C   |    |        |        |        |      |
| ATOM       | 472 | CD2  | PHE | 36 | 8.303  | 1.603  | 27.092 | 1.00 |
| 99.48      |     |      | C   |    |        |        |        |      |
| ATOM       | 473 | CE1  | PHE | 36 | 5.904  | 1.083  | 28.440 |      |
| 1.00134.48 |     |      | C   |    |        |        |        |      |
| ATOM       | 474 | CE2  | PHE | 36 | 7.801  | 0.298  | 27.151 |      |
| 1.00134.27 |     |      | C   |    |        |        |        |      |
| ATOM       | 475 | CZ   | PHE | 36 | 6.603  | 0.038  | 27.823 |      |
| 1.00149.48 |     |      | C   |    |        |        |        |      |
| ATOM       | 476 | HN   | PHE | 36 | 7.281  | 4.303  | 30.012 | 1.00 |
| 62.87      |     |      | H   |    |        |        |        |      |
| ATOM       | 477 | HA   | PHE | 36 | 9.836  | 3.593  | 28.851 | 1.00 |
| 28.53      |     |      | H   |    |        |        |        |      |
| ATOM       | 478 | HB1  | PHE | 36 | 8.702  | 4.192  | 26.742 | 1.00 |
| 73.56      |     |      | H   |    |        |        |        |      |
| ATOM       | 479 | HB2  | PHE | 36 | 7.312  | 4.758  | 27.657 | 1.00 |
| 88.42      |     |      | H   |    |        |        |        |      |
| ATOM       | 480 | HD1  | PHE | 36 | 5.869  | 3.196  | 28.859 |      |
| 1.00110.20 |     |      | H   |    |        |        |        |      |
| ATOM       | 481 | HD2  | PHE | 36 | 9.230  | 1.802  | 26.573 | 1.00 |
| 93.07      |     |      | H   |    |        |        |        |      |
| ATOM       | 482 | HE1  | PHE | 36 | 4.979  | 0.882  | 28.960 |      |
| 1.00155.06 |     |      | H   |    |        |        |        |      |
| ATOM       | 483 | HE2  | PHE | 36 | 8.339  | -0.509 | 26.674 |      |
| 1.00159.46 |     |      | H   |    |        |        |        |      |
| ATOM       | 484 | HZ   | PHE | 36 | 6.215  | -0.969 | 27.868 |      |
| 1.00183.25 |     |      | H   |    |        |        |        |      |
| ATOM       | 485 | N    | THR | 37 | 10.788 | 5.839  | 28.108 | 1.00 |
| 20.06      |     |      | N   |    |        |        |        |      |

|            |     |      |     |    |        |        |        |      |
|------------|-----|------|-----|----|--------|--------|--------|------|
| ATOM       | 486 | CA   | THR | 37 | 11.461 | 7.128  | 27.955 | 1.00 |
| 27.18      |     |      | C   |    |        |        |        |      |
| ATOM       | 487 | C    | THR | 37 | 11.770 | 7.392  | 26.486 | 1.00 |
| 41.87      |     |      | C   |    |        |        |        |      |
| ATOM       | 488 | O    | THR | 37 | 11.007 | 7.009  | 25.600 |      |
| 1.00169.86 |     |      | O   |    |        |        |        |      |
| ATOM       | 489 | CB   | THR | 37 | 12.762 | 7.134  | 28.759 | 1.00 |
| 26.52      |     |      | C   |    |        |        |        |      |
| ATOM       | 490 | CG2  | THR | 37 | 12.481 | 6.680  | 30.191 | 1.00 |
| 75.69      |     |      | C   |    |        |        |        |      |
| ATOM       | 491 | OG1  | THR | 37 | 13.694 | 6.250  | 28.153 | 1.00 |
| 81.95      |     |      | O   |    |        |        |        |      |
| ATOM       | 492 | HN   | THR | 37 | 11.207 | 5.042  | 27.725 | 1.00 |
| 18.47      |     |      | H   |    |        |        |        |      |
| ATOM       | 493 | HA   | THR | 37 | 10.821 | 7.921  | 28.323 | 1.00 |
| 38.80      |     |      | H   |    |        |        |        |      |
| ATOM       | 494 | HB   | THR | 37 | 13.172 | 8.133  | 28.777 | 1.00 |
| 81.60      |     |      | H   |    |        |        |        |      |
| ATOM       | 495 | HG1  | THR | 37 | 13.787 | 6.501  | 27.231 |      |
| 1.00188.80 |     |      | H   |    |        |        |        |      |
| ATOM       | 496 | HG21 | THR | 37 | 11.683 | 7.275  | 30.608 |      |
| 1.00196.98 |     |      | H   |    |        |        |        |      |
| ATOM       | 497 | HG22 | THR | 37 | 13.372 | 6.802  | 30.790 |      |
| 1.00196.23 |     |      | H   |    |        |        |        |      |
| ATOM       | 498 | HG23 | THR | 37 | 12.190 | 5.641  | 30.189 |      |
| 1.00168.92 |     |      | H   |    |        |        |        |      |
| ATOM       | 499 | N    | GLU | 38 | 12.895 | 8.054  | 26.239 | 1.00 |
| 26.53      |     |      | N   |    |        |        |        |      |
| ATOM       | 500 | CA   | GLU | 38 | 13.307 | 8.378  | 24.873 | 1.00 |
| 30.29      |     |      | C   |    |        |        |        |      |
| ATOM       | 501 | C    | GLU | 38 | 14.830 | 8.471  | 24.786 | 1.00 |
| 25.39      |     |      | C   |    |        |        |        |      |
| ATOM       | 502 | O    | GLU | 38 | 15.482 | 9.012  | 25.679 | 1.00 |
| 51.60      |     |      | O   |    |        |        |        |      |
| ATOM       | 503 | CB   | GLU | 38 | 12.677 | 9.709  | 24.445 | 1.00 |
| 54.82      |     |      | C   |    |        |        |        |      |
| ATOM       | 504 | CG   | GLU | 38 | 13.043 | 10.029 | 22.989 |      |
| 1.00165.84 |     |      | C   |    |        |        |        |      |
| ATOM       | 505 | CD   | GLU | 38 | 12.475 | 8.965  | 22.056 |      |
| 1.00292.92 |     |      | C   |    |        |        |        |      |
| ATOM       | 506 | OE1  | GLU | 38 | 11.545 | 8.286  | 22.459 |      |
| 1.00414.19 |     |      | O   |    |        |        |        |      |
| ATOM       | 507 | OE2  | GLU | 38 | 12.979 | 8.844  | 20.951 |      |
| 1.00537.65 |     |      | O1- |    |        |        |        |      |
| ATOM       | 508 | HN   | GLU | 38 | 13.456 | 8.331  | 26.990 | 1.00 |
| 84.50      |     |      | H   |    |        |        |        |      |
| ATOM       | 509 | HA   | GLU | 38 | 12.968 | 7.598  | 24.208 | 1.00 |
| 32.15      |     |      | H   |    |        |        |        |      |
| ATOM       | 510 | HB1  | GLU | 38 | 13.039 | 10.498 | 25.085 |      |
| 1.00144.82 |     |      | H   |    |        |        |        |      |
| ATOM       | 511 | HB2  | GLU | 38 | 11.602 | 9.639  | 24.535 |      |
| 1.00106.49 |     |      | H   |    |        |        |        |      |

|            |     |     |     |    |        |        |        |      |
|------------|-----|-----|-----|----|--------|--------|--------|------|
| ATOM       | 512 | HG1 | GLU | 38 | 14.117 | 10.062 | 22.884 |      |
| 1.00303.31 |     |     |     |    |        |        |        | H    |
| ATOM       | 513 | HG2 | GLU | 38 | 12.631 | 10.991 | 22.723 |      |
| 1.00323.99 |     |     |     |    |        |        |        | H    |
| ATOM       | 514 | N   | CYS | 39 | 15.389 | 7.938  | 23.700 | 1.00 |
| 15.84      |     |     | N   |    |        |        |        |      |
| ATOM       | 515 | CA  | CYS | 39 | 16.834 | 7.965  | 23.500 | 1.00 |
| 14.30      |     |     | C   |    |        |        |        |      |
| ATOM       | 516 | C   | CYS | 39 | 17.347 | 9.410  | 23.545 | 1.00 |
| 22.31      |     |     | C   |    |        |        |        |      |
| ATOM       | 517 | O   | CYS | 39 | 16.615 | 10.338 | 23.203 | 1.00 |
| 32.92      |     |     | O   |    |        |        |        |      |
| ATOM       | 518 | CB  | CYS | 39 | 17.173 | 7.328  | 22.148 | 1.00 |
| 18.08      |     |     | C   |    |        |        |        |      |
| ATOM       | 519 | SG  | CYS | 39 | 15.981 | 7.889  | 20.906 | 1.00 |
| 17.41      |     |     | S   |    |        |        |        |      |
| ATOM       | 520 | HN  | CYS | 39 | 14.817 | 7.521  | 23.023 | 1.00 |
| 24.87      |     |     | H   |    |        |        |        |      |
| ATOM       | 521 | HA  | CYS | 39 | 17.300 | 7.388  | 24.283 | 1.00 |
| 14.60      |     |     | H   |    |        |        |        |      |
| ATOM       | 522 | HB1 | CYS | 39 | 17.123 | 6.253  | 22.235 | 1.00 |
| 27.71      |     |     | H   |    |        |        |        |      |
| ATOM       | 523 | HB2 | CYS | 39 | 18.169 | 7.618  | 21.850 | 1.00 |
| 34.91      |     |     | H   |    |        |        |        |      |
| ATOM       | 524 | N   | PRO | 40 | 18.577 | 9.625  | 23.960 | 1.00 |
| 27.27      |     |     | N   |    |        |        |        |      |
| ATOM       | 525 | CA  | PRO | 40 | 19.165 | 10.994 | 24.047 | 1.00 |
| 47.66      |     |     | C   |    |        |        |        |      |
| ATOM       | 526 | C   | PRO | 40 | 19.537 | 11.550 | 22.673 | 1.00 |
| 71.54      |     |     | C   |    |        |        |        |      |
| ATOM       | 527 | O   | PRO | 40 | 19.743 | 10.802 | 21.720 | 1.00 |
| 87.70      |     |     | O   |    |        |        |        |      |
| ATOM       | 528 | CB  | PRO | 40 | 20.407 | 10.790 | 24.920 | 1.00 |
| 53.85      |     |     | C   |    |        |        |        |      |
| ATOM       | 529 | CG  | PRO | 40 | 20.838 | 9.395  | 24.623 | 1.00 |
| 46.04      |     |     | C   |    |        |        |        |      |
| ATOM       | 530 | CD  | PRO | 40 | 19.549 | 8.600  | 24.391 | 1.00 |
| 25.70      |     |     | C   |    |        |        |        |      |
| ATOM       | 531 | HA  | PRO | 40 | 18.479 | 11.663 | 24.544 | 1.00 |
| 58.04      |     |     | H   |    |        |        |        |      |
| ATOM       | 532 | HB1 | PRO | 40 | 20.154 | 10.884 | 25.966 | 1.00 |
| 67.93      |     |     | H   |    |        |        |        |      |
| ATOM       | 533 | HB2 | PRO | 40 | 21.183 | 11.499 | 24.655 | 1.00 |
| 70.99      |     |     | H   |    |        |        |        |      |
| ATOM       | 534 | HG1 | PRO | 40 | 21.379 | 8.979  | 25.460 | 1.00 |
| 65.91      |     |     | H   |    |        |        |        |      |
| ATOM       | 535 | HG2 | PRO | 40 | 21.458 | 9.378  | 23.733 | 1.00 |
| 54.99      |     |     | H   |    |        |        |        |      |
| ATOM       | 536 | HD1 | PRO | 40 | 19.221 | 8.133  | 25.306 | 1.00 |
| 24.22      |     |     | H   |    |        |        |        |      |
| ATOM       | 537 | HD2 | PRO | 40 | 19.693 | 7.866  | 23.612 | 1.00 |
| 26.94      |     |     | H   |    |        |        |        |      |

|            |     |      |     |    |        |        |        |
|------------|-----|------|-----|----|--------|--------|--------|
| ATOM       | 538 | N    | GLY | 41 | 19.625 | 12.873 | 22.594 |
| 1.00105.24 |     |      | N   |    |        |        |        |
| ATOM       | 539 | CA   | GLY | 41 | 19.981 | 13.547 | 21.346 |
| 1.00147.55 |     |      | C   |    |        |        |        |
| ATOM       | 540 | C    | GLY | 41 | 21.480 | 13.822 | 21.291 |
| 1.00161.74 |     |      | C   |    |        |        |        |
| ATOM       | 541 | O    | GLY | 41 | 22.259 | 12.973 | 20.858 |
| 1.00244.37 |     |      | O   |    |        |        |        |
| ATOM       | 542 | HN   | GLY | 41 | 19.453 | 13.407 | 23.394 |
| 1.00121.79 |     |      | H   |    |        |        |        |
| ATOM       | 543 | HA1  | GLY | 41 | 19.451 | 14.486 | 21.288 |
| 1.00184.40 |     |      | H   |    |        |        |        |
| ATOM       | 544 | HA2  | GLY | 41 | 19.697 | 12.928 | 20.506 |
| 1.00157.34 |     |      | H   |    |        |        |        |
| ATOM       | 545 | N    | LEU | 42 | 21.878 | 15.012 | 21.733 |
| 1.00162.48 |     |      | N   |    |        |        |        |
| ATOM       | 546 | CA   | LEU | 42 | 23.289 | 15.387 | 21.730 |
| 1.00191.48 |     |      | C   |    |        |        |        |
| ATOM       | 547 | C    | LEU | 42 | 23.993 | 14.802 | 22.952 |
| 1.00166.66 |     |      | C   |    |        |        |        |
| ATOM       | 548 | O    | LEU | 42 | 23.468 | 14.847 | 24.064 |
| 1.00251.38 |     |      | O   |    |        |        |        |
| ATOM       | 549 | CB   | LEU | 42 | 23.427 | 16.911 | 21.746 |
| 1.00307.99 |     |      | C   |    |        |        |        |
| ATOM       | 550 | CG   | LEU | 42 | 22.686 | 17.519 | 20.547 |
| 1.00452.28 |     |      | C   |    |        |        |        |
| ATOM       | 551 | CD1  | LEU | 42 | 22.771 | 19.046 | 20.630 |
| 1.00681.24 |     |      | C   |    |        |        |        |
| ATOM       | 552 | CD2  | LEU | 42 | 23.322 | 17.037 | 19.231 |
| 1.00527.46 |     |      | C   |    |        |        |        |
| ATOM       | 553 | HN   | LEU | 42 | 21.212 | 15.647 | 22.068 |
| 1.00195.47 |     |      | H   |    |        |        |        |
| ATOM       | 554 | HA   | LEU | 42 | 23.760 | 14.999 | 20.840 |
| 1.00229.77 |     |      | H   |    |        |        |        |
| ATOM       | 555 | HB1  | LEU | 42 | 24.472 | 17.176 | 21.690 |
| 1.00342.49 |     |      | H   |    |        |        |        |
| ATOM       | 556 | HB2  | LEU | 42 | 23.006 | 17.298 | 22.662 |
| 1.00335.33 |     |      | H   |    |        |        |        |
| ATOM       | 557 | HG   | LEU | 42 | 21.648 | 17.218 | 20.581 |
| 1.00427.79 |     |      | H   |    |        |        |        |
| ATOM       | 558 | HD11 | LEU | 42 | 23.803 | 19.355 | 20.535 |
| 1.00909.71 |     |      | H   |    |        |        |        |
| ATOM       | 559 | HD12 | LEU | 42 | 22.381 | 19.379 | 21.580 |
| 1.00706.80 |     |      | H   |    |        |        |        |
| ATOM       | 560 | HD13 | LEU | 42 | 22.191 | 19.483 | 19.830 |
| 1.00858.82 |     |      | H   |    |        |        |        |
| ATOM       | 561 | HD21 | LEU | 42 | 22.919 | 16.068 | 18.972 |
| 1.00631.69 |     |      | H   |    |        |        |        |
| ATOM       | 562 | HD22 | LEU | 42 | 24.393 | 16.962 | 19.349 |
| 1.00628.06 |     |      | H   |    |        |        |        |
| ATOM       | 563 | HD23 | LEU | 42 | 23.097 | 17.739 | 18.440 |
| 1.00656.75 |     |      | H   |    |        |        |        |

|            |     |      |     |    |        |        |        |
|------------|-----|------|-----|----|--------|--------|--------|
| ATOM       | 564 | N    | THR | 43 | 25.184 | 14.253 | 22.736 |
| 1.00178.52 |     |      |     | N  |        |        |        |
| ATOM       | 565 | CA   | THR | 43 | 25.957 | 13.657 | 23.825 |
| 1.00240.84 |     |      |     | C  |        |        |        |
| ATOM       | 566 | C    | THR | 43 | 26.699 | 14.754 | 24.606 |
| 1.00372.31 |     |      |     | C  |        |        |        |
| ATOM       | 567 | O    | THR | 43 | 26.882 | 15.854 | 24.083 |
| 1.00500.13 |     |      |     | O  |        |        |        |
| ATOM       | 568 | CB   | THR | 43 | 26.958 | 12.648 | 23.245 |
| 1.00354.13 |     |      |     | C  |        |        |        |
| ATOM       | 569 | CG2  | THR | 43 | 26.215 | 11.589 | 22.422 |
| 1.00463.04 |     |      |     | C  |        |        |        |
| ATOM       | 570 | OG1  | THR | 43 | 27.885 | 13.327 | 22.412 |
| 1.00508.50 |     |      |     | O  |        |        |        |
| ATOM       | 571 | HN   | THR | 43 | 25.553 | 14.244 | 21.827 |
| 1.00229.59 |     |      |     | H  |        |        |        |
| ATOM       | 572 | HA   | THR | 43 | 25.276 | 13.140 | 24.478 |
| 1.00249.90 |     |      |     | H  |        |        |        |
| ATOM       | 573 | HB   | THR | 43 | 27.488 | 12.163 | 24.045 |
| 1.00481.58 |     |      |     | H  |        |        |        |
| ATOM       | 574 | HG1  | THR | 43 | 28.642 | 12.751 | 22.279 |
| 1.00624.31 |     |      |     | H  |        |        |        |
| ATOM       | 575 | HG21 | THR | 43 | 25.778 | 10.858 | 23.087 |
| 1.00650.95 |     |      |     | H  |        |        |        |
| ATOM       | 576 | HG22 | THR | 43 | 26.909 | 11.100 | 21.756 |
| 1.00580.73 |     |      |     | H  |        |        |        |
| ATOM       | 577 | HG23 | THR | 43 | 25.435 | 12.058 | 21.841 |
| 1.00571.99 |     |      |     | H  |        |        |        |
| ATOM       | 578 | N    | PRO | 44 | 27.135 | 14.507 | 25.831 |
| 1.00488.39 |     |      |     | N  |        |        |        |
| ATOM       | 579 | CA   | PRO | 44 | 27.865 | 15.543 | 26.630 |
| 1.00760.13 |     |      |     | C  |        |        |        |
| ATOM       | 580 | C    | PRO | 44 | 29.124 | 16.025 | 25.914 |
| 1.00735.36 |     |      |     | C  |        |        |        |
| ATOM       | 581 | O    | PRO | 44 | 29.628 | 17.115 | 26.185 |
| 1.00999.99 |     |      |     | O  |        |        |        |
| ATOM       | 582 | CB   | PRO | 44 | 28.217 | 14.823 | 27.947 |
| 1.00999.99 |     |      |     | C  |        |        |        |
| ATOM       | 583 | CG   | PRO | 44 | 27.256 | 13.687 | 28.037 |
| 1.00856.94 |     |      |     | C  |        |        |        |
| ATOM       | 584 | CD   | PRO | 44 | 26.999 | 13.249 | 26.599 |
| 1.00548.09 |     |      |     | C  |        |        |        |
| ATOM       | 585 | HA   | PRO | 44 | 27.215 | 16.377 | 26.834 |
| 1.00939.00 |     |      |     | H  |        |        |        |
| ATOM       | 586 | HB1  | PRO | 44 | 28.081 | 15.486 | 28.786 |
| 1.00999.99 |     |      |     | H  |        |        |        |
| ATOM       | 587 | HB2  | PRO | 44 | 29.235 | 14.455 | 27.921 |
| 1.00999.99 |     |      |     | H  |        |        |        |
| ATOM       | 588 | HG1  | PRO | 44 | 26.331 | 14.011 | 28.491 |
| 1.00999.99 |     |      |     | H  |        |        |        |
| ATOM       | 589 | HG2  | PRO | 44 | 27.689 | 12.874 | 28.608 |
| 1.00853.53 |     |      |     | H  |        |        |        |

|            |     |      |     |    |        |        |        |
|------------|-----|------|-----|----|--------|--------|--------|
| ATOM       | 590 | HD1  | PRO | 44 | 26.008 | 12.851 | 26.512 |
| 1.00602.45 |     |      |     | H  |        |        |        |
| ATOM       | 591 | HD2  | PRO | 44 | 27.741 | 12.526 | 26.293 |
| 1.00463.32 |     |      |     | H  |        |        |        |
| ATOM       | 592 | N    | ILE | 45 | 29.633 | 15.192 | 25.010 |
| 1.00518.33 |     |      |     | N  |        |        |        |
| ATOM       | 593 | CA   | ILE | 45 | 30.842 | 15.519 | 24.261 |
| 1.00582.79 |     |      |     | C  |        |        |        |
| ATOM       | 594 | C    | ILE | 45 | 30.883 | 17.003 | 23.894 |
| 1.00795.93 |     |      |     | C  |        |        |        |
| ATOM       | 595 | O    | ILE | 45 | 29.849 | 17.611 | 23.617 |
| 1.00898.75 |     |      |     | O  |        |        |        |
| ATOM       | 596 | CB   | ILE | 45 | 30.906 | 14.666 | 22.987 |
| 1.00474.41 |     |      |     | C  |        |        |        |
| ATOM       | 597 | CG1  | ILE | 45 | 32.308 | 14.760 | 22.371 |
| 1.00516.90 |     |      |     | C  |        |        |        |
| ATOM       | 598 | CG2  | ILE | 45 | 29.867 | 15.166 | 21.972 |
| 1.00760.75 |     |      |     | C  |        |        |        |
| ATOM       | 599 | CD1  | ILE | 45 | 32.438 | 13.734 | 21.244 |
| 1.00566.81 |     |      |     | C  |        |        |        |
| ATOM       | 600 | HN   | ILE | 45 | 29.188 | 14.334 | 24.848 |
| 1.00395.72 |     |      |     | H  |        |        |        |
| ATOM       | 601 | HA   | ILE | 45 | 31.696 | 15.287 | 24.875 |
| 1.00711.06 |     |      |     | H  |        |        |        |
| ATOM       | 602 | HB   | ILE | 45 | 30.692 | 13.637 | 23.236 |
| 1.00477.81 |     |      |     | H  |        |        |        |
| ATOM       | 603 | HG11 | ILE | 45 | 33.050 | 14.556 | 23.128 |
| 1.00624.28 |     |      |     | H  |        |        |        |
| ATOM       | 604 | HG12 | ILE | 45 | 32.460 | 15.754 | 21.974 |
| 1.00744.84 |     |      |     | H  |        |        |        |
| ATOM       | 605 | HG21 | ILE | 45 | 30.243 | 16.046 | 21.470 |
| 1.00920.57 |     |      |     | H  |        |        |        |
| ATOM       | 606 | HG22 | ILE | 45 | 28.948 | 15.411 | 22.485 |
| 1.00999.99 |     |      |     | H  |        |        |        |
| ATOM       | 607 | HG23 | ILE | 45 | 29.674 | 14.391 | 21.243 |
| 1.00865.46 |     |      |     | H  |        |        |        |
| ATOM       | 608 | HD11 | ILE | 45 | 32.243 | 12.746 | 21.634 |
| 1.00658.89 |     |      |     | H  |        |        |        |
| ATOM       | 609 | HD12 | ILE | 45 | 33.438 | 13.770 | 20.838 |
| 1.00734.30 |     |      |     | H  |        |        |        |
| ATOM       | 610 | HD13 | ILE | 45 | 31.726 | 13.961 | 20.465 |
| 1.00675.84 |     |      |     | H  |        |        |        |
| ATOM       | 611 | N    | ALA | 46 | 32.081 | 17.576 | 23.894 |
| 1.00999.99 |     |      |     | N  |        |        |        |
| ATOM       | 612 | CA   | ALA | 46 | 32.241 | 18.987 | 23.558 |
| 1.00999.99 |     |      |     | C  |        |        |        |
| ATOM       | 613 | C    | ALA | 46 | 33.690 | 19.290 | 23.189 |
| 1.00999.99 |     |      |     | C  |        |        |        |
| ATOM       | 614 | CB   | ALA | 46 | 31.822 | 19.856 | 24.745 |
| 1.00999.99 |     |      |     | C  |        |        |        |
| ATOM       | 615 | OT1  | ALA | 46 | 34.111 | 18.862 | 22.128 |
| 1.00999.99 |     |      |     | O  |        |        |        |



|            |     |     |     |    |        |        |        |
|------------|-----|-----|-----|----|--------|--------|--------|
| ATOM       | 616 | OT2 | ALA | 46 | 34.355 | 19.946 | 23.973 |
| 1.00999.99 |     |     | O   |    |        |        |        |
| ATOM       | 617 | HN  | ALA | 46 | 32.871 | 17.043 | 24.122 |
| 1.00999.99 |     |     | H   |    |        |        |        |
| ATOM       | 618 | HA  | ALA | 46 | 31.608 | 19.222 | 22.715 |
| 1.00999.99 |     |     | H   |    |        |        |        |
| ATOM       | 619 | HB1 | ALA | 46 | 31.970 | 20.897 | 24.499 |
| 1.00999.99 |     |     | H   |    |        |        |        |
| ATOM       | 620 | HB2 | ALA | 46 | 32.421 | 19.601 | 25.608 |
| 1.00999.99 |     |     | H   |    |        |        |        |
| ATOM       | 621 | HB3 | ALA | 46 | 30.779 | 19.684 | 24.967 |
| 1.00999.99 |     |     | H   |    |        |        |        |
| ENDMDL     |     |     |     |    |        |        |        |
| TER        |     |     |     |    |        |        |        |
| MODEL      | 14  |     |     |    |        |        |        |
| ATOM       | 1   | N   | GLY | 1  | 28.026 | 1.545  | 12.408 |
| 1.00999.99 |     |     | N   |    |        |        |        |
| ATOM       | 2   | CA  | GLY | 1  | 27.030 | 0.736  | 13.167 |
| 1.00999.99 |     |     | C   |    |        |        |        |
| ATOM       | 3   | C   | GLY | 1  | 25.707 | 1.489  | 13.236 |
| 1.00999.99 |     |     | C   |    |        |        |        |
| ATOM       | 4   | O   | GLY | 1  | 25.623 | 2.563  | 13.831 |
| 1.00999.99 |     |     | O   |    |        |        |        |
| ATOM       | 5   | HA1 | GLY | 1  | 27.393 | 0.563  | 14.168 |
| 1.00999.99 |     |     | H   |    |        |        |        |
| ATOM       | 6   | HA2 | GLY | 1  | 26.882 | -0.211 | 12.668 |
| 1.00999.99 |     |     | H   |    |        |        |        |
| ATOM       | 7   | HT1 | GLY | 1  | 28.282 | 2.388  | 12.961 |
| 1.00999.99 |     |     | H   |    |        |        |        |
| ATOM       | 8   | HT2 | GLY | 1  | 27.614 | 1.838  | 11.499 |
| 1.00999.99 |     |     | H   |    |        |        |        |
| ATOM       | 9   | HT3 | GLY | 1  | 28.877 | 0.975  | 12.237 |
| 1.00999.99 |     |     | H   |    |        |        |        |
| ATOM       | 10  | N   | LEU | 2  | 24.671 | 0.917  | 12.622 |
| 1.00999.99 |     |     | N   |    |        |        |        |
| ATOM       | 11  | CA  | LEU | 2  | 23.340 | 1.532  | 12.609 |
| 1.00895.59 |     |     | C   |    |        |        |        |
| ATOM       | 12  | C   | LEU | 2  | 22.318 | 0.588  | 13.235 |
| 1.00532.27 |     |     | C   |    |        |        |        |
| ATOM       | 13  | O   | LEU | 2  | 22.456 | -0.632 | 13.152 |
| 1.00625.21 |     |     | O   |    |        |        |        |
| ATOM       | 14  | CB  | LEU | 2  | 22.924 | 1.845  | 11.170 |
| 1.00999.99 |     |     | C   |    |        |        |        |
| ATOM       | 15  | CG  | LEU | 2  | 23.982 | 2.728  | 10.498 |
| 1.00999.99 |     |     | C   |    |        |        |        |
| ATOM       | 16  | CD1 | LEU | 2  | 23.572 | 2.983  | 9.044  |
| 1.00999.99 |     |     | C   |    |        |        |        |
| ATOM       | 17  | CD2 | LEU | 2  | 24.103 | 4.069  | 11.243 |
| 1.00999.99 |     |     | C   |    |        |        |        |
| ATOM       | 18  | HN  | LEU | 2  | 24.803 | 0.060  | 12.165 |
| 1.00999.99 |     |     | H   |    |        |        |        |
| ATOM       | 19  | HA  | LEU | 2  | 23.356 | 2.451  | 13.178 |

|            |    |      |     |   |   |        |        |        |      |  |  |
|------------|----|------|-----|---|---|--------|--------|--------|------|--|--|
| 1.00890.87 |    |      |     |   |   |        |        |        |      |  |  |
| ATOM       | 20 | HB1  | LEU | H | 2 | 21.977 | 2.365  | 11.176 |      |  |  |
| 1.00924.07 |    |      |     |   |   |        |        |        |      |  |  |
| ATOM       | 21 | HB2  | LEU | H | 2 | 22.822 | 0.921  | 10.617 |      |  |  |
| 1.00999.99 |    |      |     |   |   |        |        |        |      |  |  |
| ATOM       | 22 | HG   | LEU | H | 2 | 24.935 | 2.218  | 10.514 |      |  |  |
| 1.00999.99 |    |      |     |   |   |        |        |        |      |  |  |
| ATOM       | 23 | HD11 | LEU | H | 2 | 23.345 | 2.042  | 8.564  |      |  |  |
| 1.00999.99 |    |      |     |   |   |        |        |        |      |  |  |
| ATOM       | 24 | HD12 | LEU | H | 2 | 24.384 | 3.467  | 8.521  |      |  |  |
| 1.00999.99 |    |      |     |   |   |        |        |        |      |  |  |
| ATOM       | 25 | HD13 | LEU | H | 2 | 22.700 | 3.619  | 9.022  |      |  |  |
| 1.00999.99 |    |      |     |   |   |        |        |        |      |  |  |
| ATOM       | 26 | HD21 | LEU | H | 2 | 24.518 | 4.817  | 10.582 |      |  |  |
| 1.00999.99 |    |      |     |   |   |        |        |        |      |  |  |
| ATOM       | 27 | HD22 | LEU | H | 2 | 24.754 | 3.948  | 12.096 |      |  |  |
| 1.00999.99 |    |      |     |   |   |        |        |        |      |  |  |
| ATOM       | 28 | HD23 | LEU | H | 2 | 23.126 | 4.388  | 11.578 |      |  |  |
| 1.00999.99 |    |      |     |   |   |        |        |        |      |  |  |
| ATOM       | 29 | N    | CYS | N | 3 | 21.293 | 1.159  | 13.860 |      |  |  |
| 1.00271.28 |    |      |     |   |   |        |        |        |      |  |  |
| ATOM       | 30 | CA   | CYS | C | 3 | 20.255 | 0.351  | 14.492 |      |  |  |
| 1.00104.50 |    |      |     |   |   |        |        |        |      |  |  |
| ATOM       | 31 | C    | CYS | C | 3 | 19.477 | -0.430 | 13.438 | 1.00 |  |  |
| 90.98      |    |      |     |   |   |        |        |        |      |  |  |
| ATOM       | 32 | O    | CYS | O | 3 | 19.280 | 0.048  | 12.321 |      |  |  |
| 1.00207.28 |    |      |     |   |   |        |        |        |      |  |  |
| ATOM       | 33 | CB   | CYS | C | 3 | 19.293 | 1.247  | 15.277 | 1.00 |  |  |
| 37.83      |    |      |     |   |   |        |        |        |      |  |  |
| ATOM       | 34 | SG   | CYS | S | 3 | 20.176 | 2.037  | 16.648 | 1.00 |  |  |
| 81.56      |    |      |     |   |   |        |        |        |      |  |  |
| ATOM       | 35 | HN   | CYS | H | 3 | 21.232 | 2.138  | 13.895 |      |  |  |
| 1.00296.55 |    |      |     |   |   |        |        |        |      |  |  |
| ATOM       | 36 | HA   | CYS | H | 3 | 20.720 | -0.345 | 15.175 |      |  |  |
| 1.00166.45 |    |      |     |   |   |        |        |        |      |  |  |
| ATOM       | 37 | HB1  | CYS | H | 3 | 18.483 | 0.650  | 15.667 | 1.00 |  |  |
| 40.38      |    |      |     |   |   |        |        |        |      |  |  |
| ATOM       | 38 | HB2  | CYS | H | 3 | 18.895 | 2.009  | 14.621 | 1.00 |  |  |
| 98.45      |    |      |     |   |   |        |        |        |      |  |  |
| ATOM       | 39 | N    | SER | N | 4 | 19.038 | -1.630 | 13.800 | 1.00 |  |  |
| 85.31      |    |      |     |   |   |        |        |        |      |  |  |
| ATOM       | 40 | CA   | SER | C | 4 | 18.281 | -2.465 | 12.875 | 1.00 |  |  |
| 92.94      |    |      |     |   |   |        |        |        |      |  |  |
| ATOM       | 41 | C    | SER | C | 4 | 17.009 | -1.754 | 12.452 | 1.00 |  |  |
| 67.37      |    |      |     |   |   |        |        |        |      |  |  |
| ATOM       | 42 | O    | SER | O | 4 | 16.621 | -1.778 | 11.283 |      |  |  |
| 1.00102.28 |    |      |     |   |   |        |        |        |      |  |  |
| ATOM       | 43 | CB   | SER | C | 4 | 17.888 | -3.774 | 13.552 |      |  |  |
| 1.00123.83 |    |      |     |   |   |        |        |        |      |  |  |
| ATOM       | 44 | OG   | SER | O | 4 | 17.277 | -4.632 | 12.596 |      |  |  |
| 1.00178.89 |    |      |     |   |   |        |        |        |      |  |  |
| ATOM       | 45 | HN   | SER | O | 4 | 19.224 | -1.958 | 14.704 |      |  |  |



|            |    |      |     |     |   |        |        |        |      |
|------------|----|------|-----|-----|---|--------|--------|--------|------|
| 1.00244.88 |    |      |     | N   |   |        |        |        |      |
| ATOM       | 72 | OD1  | ASN |     | 6 | 13.137 | 4.163  | 12.782 |      |
| 1.00219.73 |    |      |     | O   |   |        |        |        |      |
| ATOM       | 73 | HN   | ASN |     | 6 | 13.104 | 1.100  | 13.519 | 1.00 |
| 72.81      |    |      | H   |     |   |        |        |        |      |
| ATOM       | 74 | HA   | ASN |     | 6 | 14.326 | 3.336  | 14.702 | 1.00 |
| 96.02      |    |      | H   |     |   |        |        |        |      |
| ATOM       | 75 | HB1  | ASN |     | 6 | 11.971 | 3.859  | 15.494 |      |
| 1.00111.09 |    |      |     | H   |   |        |        |        |      |
| ATOM       | 76 | HB2  | ASN |     | 6 | 11.480 | 2.325  | 14.778 | 1.00 |
| 98.13      |    |      | H   |     |   |        |        |        |      |
| ATOM       | 77 | HD21 | ASN |     | 6 | 10.134 | 3.688  | 13.264 |      |
| 1.00272.43 |    |      |     | H   |   |        |        |        |      |
| ATOM       | 78 | HD22 | ASN |     | 6 | 10.885 | 4.409  | 11.923 |      |
| 1.00336.78 |    |      |     | H   |   |        |        |        |      |
| ATOM       | 79 | N    | GLY |     | 7 | 13.287 | 1.009  | 16.783 | 1.00 |
| 51.80      |    |      | N   |     |   |        |        |        |      |
| ATOM       | 80 | CA   | GLY |     | 7 | 13.391 | 0.518  | 18.159 | 1.00 |
| 71.47      |    |      | C   |     |   |        |        |        |      |
| ATOM       | 81 | C    | GLY |     | 7 | 14.059 | -0.850 | 18.192 | 1.00 |
| 41.04      |    |      | C   |     |   |        |        |        |      |
| ATOM       | 82 | O    | GLY |     | 7 | 13.406 | -1.871 | 18.400 | 1.00 |
| 44.54      |    |      | O   |     |   |        |        |        |      |
| ATOM       | 83 | HN   | GLY |     | 7 | 12.854 | 0.448  | 16.108 | 1.00 |
| 45.49      |    |      | H   |     |   |        |        |        |      |
| ATOM       | 84 | HA1  | GLY |     | 7 | 12.404 | 0.432  | 18.579 |      |
| 1.00103.52 |    |      |     | H   |   |        |        |        |      |
| ATOM       | 85 | HA2  | GLY |     | 7 | 13.972 | 1.210  | 18.755 |      |
| 1.00108.67 |    |      |     | H   |   |        |        |        |      |
| ATOM       | 86 | N    | ASP |     | 8 | 15.369 | -0.858 | 17.981 | 1.00 |
| 27.00      |    |      | N   |     |   |        |        |        |      |
| ATOM       | 87 | CA   | ASP |     | 8 | 16.129 | -2.102 | 17.983 | 1.00 |
| 14.15      |    |      | C   |     |   |        |        |        |      |
| ATOM       | 88 | C    | ASP |     | 8 | 16.032 | -2.787 | 19.340 | 1.00 |
| 9.37       |    |      | C   |     |   |        |        |        |      |
| ATOM       | 89 | O    | ASP |     | 8 | 15.836 | -4.000 | 19.423 | 1.00 |
| 14.61      |    |      | O   |     |   |        |        |        |      |
| ATOM       | 90 | CB   | ASP |     | 8 | 17.596 | -1.821 | 17.654 | 1.00 |
| 15.06      |    |      | C   |     |   |        |        |        |      |
| ATOM       | 91 | CG   | ASP |     | 8 | 18.373 | -3.130 | 17.578 | 1.00 |
| 21.22      |    |      | C   |     |   |        |        |        |      |
| ATOM       | 92 | OD1  | ASP |     | 8 | 19.528 | -3.089 | 17.185 |      |
| 1.00119.56 |    |      |     | O   |   |        |        |        |      |
| ATOM       | 93 | OD2  | ASP |     | 8 | 17.803 | -4.156 | 17.912 |      |
| 1.00133.27 |    |      |     | O1- |   |        |        |        |      |
| ATOM       | 94 | HN   | ASP |     | 8 | 15.831 | -0.011 | 17.818 | 1.00 |
| 35.63      |    |      | H   |     |   |        |        |        |      |
| ATOM       | 95 | HA   | ASP |     | 8 | 15.724 | -2.759 | 17.232 | 1.00 |
| 20.92      |    |      | H   |     |   |        |        |        |      |
| ATOM       | 96 | HB1  | ASP |     | 8 | 18.023 | -1.197 | 18.426 | 1.00 |
| 29.39      |    |      | H   |     |   |        |        |        |      |
| ATOM       | 97 | HB2  | ASP |     | 8 | 17.659 | -1.310 | 16.705 | 1.00 |

|            |     |     |     |    |        |        |        |      |  |
|------------|-----|-----|-----|----|--------|--------|--------|------|--|
| 44.14      |     |     | H   |    |        |        |        |      |  |
| ATOM       | 98  | N   | CYS | 9  | 16.169 | -2.001 | 20.397 | 1.00 |  |
| 5.93       |     |     | N   |    |        |        |        |      |  |
| ATOM       | 99  | CA  | CYS | 9  | 16.095 | -2.537 | 21.751 | 1.00 |  |
| 7.54       |     |     | C   |    |        |        |        |      |  |
| ATOM       | 100 | C   | CYS | 9  | 14.717 | -3.131 | 22.012 | 1.00 |  |
| 14.60      |     |     | C   |    |        |        |        |      |  |
| ATOM       | 101 | O   | CYS | 9  | 14.589 | -4.199 | 22.611 | 1.00 |  |
| 25.78      |     |     | O   |    |        |        |        |      |  |
| ATOM       | 102 | CB  | CYS | 9  | 16.383 | -1.432 | 22.757 | 1.00 |  |
| 6.63       |     |     | C   |    |        |        |        |      |  |
| ATOM       | 103 | SG  | CYS | 9  | 18.127 | -1.008 | 22.639 | 1.00 |  |
| 10.91      |     |     | S   |    |        |        |        |      |  |
| ATOM       | 104 | HN  | CYS | 9  | 16.321 | -1.044 | 20.264 | 1.00 |  |
| 6.51       |     |     | H   |    |        |        |        |      |  |
| ATOM       | 105 | HA  | CYS | 9  | 16.844 | -3.301 | 21.863 | 1.00 |  |
| 11.12      |     |     | H   |    |        |        |        |      |  |
| ATOM       | 106 | HB1 | CYS | 9  | 16.165 | -1.774 | 23.755 | 1.00 |  |
| 11.28      |     |     | H   |    |        |        |        |      |  |
| ATOM       | 107 | HB2 | CYS | 9  | 15.780 | -0.564 | 22.528 | 1.00 |  |
| 5.04       |     |     | H   |    |        |        |        |      |  |
| ATOM       | 108 | N   | ALA | 10 | 13.694 | -2.428 | 21.550 | 1.00 |  |
| 16.26      |     |     | N   |    |        |        |        |      |  |
| ATOM       | 109 | CA  | ALA | 10 | 12.318 | -2.880 | 21.719 | 1.00 |  |
| 32.04      |     |     | C   |    |        |        |        |      |  |
| ATOM       | 110 | C   | ALA | 10 | 11.377 | -2.024 | 20.874 | 1.00 |  |
| 45.47      |     |     | C   |    |        |        |        |      |  |
| ATOM       | 111 | O   | ALA | 10 | 11.748 | -0.942 | 20.420 |      |  |
| 1.00119.04 |     |     | O   |    |        |        |        |      |  |
| ATOM       | 112 | CB  | ALA | 10 | 11.914 | -2.806 | 23.194 | 1.00 |  |
| 30.10      |     |     | C   |    |        |        |        |      |  |
| ATOM       | 113 | HN  | ALA | 10 | 13.867 | -1.589 | 21.077 | 1.00 |  |
| 12.81      |     |     | H   |    |        |        |        |      |  |
| ATOM       | 114 | HA  | ALA | 10 | 12.246 | -3.906 | 21.388 | 1.00 |  |
| 47.14      |     |     | H   |    |        |        |        |      |  |
| ATOM       | 115 | HB1 | ALA | 10 | 11.633 | -1.794 | 23.443 | 1.00 |  |
| 84.37      |     |     | H   |    |        |        |        |      |  |
| ATOM       | 116 | HB2 | ALA | 10 | 12.747 | -3.110 | 23.810 |      |  |
| 1.00118.20 |     |     | H   |    |        |        |        |      |  |
| ATOM       | 117 | HB3 | ALA | 10 | 11.077 | -3.464 | 23.371 |      |  |
| 1.00117.32 |     |     | H   |    |        |        |        |      |  |
| ATOM       | 118 | N   | ALA | 11 | 10.163 | -2.516 | 20.663 | 1.00 |  |
| 30.62      |     |     | N   |    |        |        |        |      |  |
| ATOM       | 119 | CA  | ALA | 11 | 9.182  | -1.788 | 19.866 | 1.00 |  |
| 35.24      |     |     | C   |    |        |        |        |      |  |
| ATOM       | 120 | C   | ALA | 11 | 8.864  | -0.434 | 20.499 | 1.00 |  |
| 22.78      |     |     | C   |    |        |        |        |      |  |
| ATOM       | 121 | O   | ALA | 11 | 8.702  | 0.564  | 19.797 | 1.00 |  |
| 53.33      |     |     | O   |    |        |        |        |      |  |
| ATOM       | 122 | CB  | ALA | 11 | 7.897  | -2.607 | 19.747 | 1.00 |  |
| 60.49      |     |     | C   |    |        |        |        |      |  |
| ATOM       | 123 | HN  | ALA | 11 | 9.922  | -3.386 | 21.047 | 1.00 |  |

|            |     |     |     |     |        |        |        |      |  |
|------------|-----|-----|-----|-----|--------|--------|--------|------|--|
| 50.37      |     |     | H   |     |        |        |        |      |  |
| ATOM       | 124 | HA  | ALA | 11  | 9.585  | -1.626 | 18.879 | 1.00 |  |
| 41.70      |     |     | H   |     |        |        |        |      |  |
| ATOM       | 125 | HB1 | ALA | 11  | 7.349  | -2.555 | 20.676 |      |  |
| 1.00157.06 |     |     |     | H   |        |        |        |      |  |
| ATOM       | 126 | HB2 | ALA | 11  | 8.145  | -3.637 | 19.534 |      |  |
| 1.00148.83 |     |     |     | H   |        |        |        |      |  |
| ATOM       | 127 | HB3 | ALA | 11  | 7.289  | -2.211 | 18.948 |      |  |
| 1.00137.06 |     |     |     | H   |        |        |        |      |  |
| ATOM       | 128 | N   | ASP | 12  | 8.765  | -0.411 | 21.825 | 1.00 |  |
| 18.98      |     |     | N   |     |        |        |        |      |  |
| ATOM       | 129 | CA  | ASP | 12  | 8.452  | 0.823  | 22.549 | 1.00 |  |
| 31.05      |     |     | C   |     |        |        |        |      |  |
| ATOM       | 130 | C   | ASP | 12  | 9.721  | 1.567  | 22.958 | 1.00 |  |
| 22.98      |     |     | C   |     |        |        |        |      |  |
| ATOM       | 131 | O   | ASP | 12  | 9.662  | 2.522  | 23.734 | 1.00 |  |
| 37.14      |     |     | O   |     |        |        |        |      |  |
| ATOM       | 132 | CB  | ASP | 12  | 7.628  | 0.493  | 23.796 | 1.00 |  |
| 48.35      |     |     | C   |     |        |        |        |      |  |
| ATOM       | 133 | CG  | ASP | 12  | 8.428  | -0.410 | 24.727 |      |  |
| 1.00104.83 |     |     |     | C   |        |        |        |      |  |
| ATOM       | 134 | OD1 | ASP | 12  | 7.972  | -0.637 | 25.837 |      |  |
| 1.00258.73 |     |     |     | O   |        |        |        |      |  |
| ATOM       | 135 | OD2 | ASP | 12  | 9.481  | -0.868 | 24.317 |      |  |
| 1.00213.46 |     |     |     | O1- |        |        |        |      |  |
| ATOM       | 136 | HN  | ASP | 12  | 8.897  | -1.241 | 22.330 | 1.00 |  |
| 36.19      |     |     | H   |     |        |        |        |      |  |
| ATOM       | 137 | HA  | ASP | 12  | 7.863  | 1.466  | 21.911 | 1.00 |  |
| 49.76      |     |     | H   |     |        |        |        |      |  |
| ATOM       | 138 | HB1 | ASP | 12  | 6.720  | -0.012 | 23.502 | 1.00 |  |
| 95.71      |     |     | H   |     |        |        |        |      |  |
| ATOM       | 139 | HB2 | ASP | 12  | 7.378  | 1.408  | 24.311 | 1.00 |  |
| 54.37      |     |     | H   |     |        |        |        |      |  |
| ATOM       | 140 | N   | GLU | 13  | 10.868 | 1.133  | 22.432 | 1.00 |  |
| 17.60      |     |     | N   |     |        |        |        |      |  |
| ATOM       | 141 | CA  | GLU | 13  | 12.154 | 1.772  | 22.748 | 1.00 |  |
| 12.01      |     |     | C   |     |        |        |        |      |  |
| ATOM       | 142 | C   | GLU | 13  | 12.795 | 2.353  | 21.492 | 1.00 |  |
| 10.07      |     |     | C   |     |        |        |        |      |  |
| ATOM       | 143 | O   | GLU | 13  | 12.449 | 1.978  | 20.373 | 1.00 |  |
| 12.81      |     |     | O   |     |        |        |        |      |  |
| ATOM       | 144 | CB  | GLU | 13  | 13.103 | 0.757  | 23.385 | 1.00 |  |
| 11.74      |     |     | C   |     |        |        |        |      |  |
| ATOM       | 145 | CG  | GLU | 13  | 12.602 | 0.400  | 24.786 | 1.00 |  |
| 13.49      |     |     | C   |     |        |        |        |      |  |
| ATOM       | 146 | CD  | GLU | 13  | 12.786 | 1.589  | 25.721 |      |  |
| 1.00142.36 |     |     |     | C   |        |        |        |      |  |
| ATOM       | 147 | OE1 | GLU | 13  | 13.471 | 2.520  | 25.332 |      |  |
| 1.00339.06 |     |     |     | O   |        |        |        |      |  |
| ATOM       | 148 | OE2 | GLU | 13  | 12.236 | 1.556  | 26.807 |      |  |
| 1.00335.28 |     |     |     | O1- |        |        |        |      |  |
| ATOM       | 149 | HN  | GLU | 13  | 10.853 | 0.370  | 21.817 | 1.00 |  |

|       |     |     |     |    |        |        |        |      |
|-------|-----|-----|-----|----|--------|--------|--------|------|
| 28.36 |     |     | H   |    |        |        |        |      |
| ATOM  | 150 | HA  | GLU | 13 | 11.993 | 2.578  | 23.452 | 1.00 |
| 13.06 |     |     | H   |    |        |        |        |      |
| ATOM  | 151 | HB1 | GLU | 13 | 14.092 | 1.183  | 23.456 | 1.00 |
| 13.76 |     |     | H   |    |        |        |        |      |
| ATOM  | 152 | HB2 | GLU | 13 | 13.140 | -0.134 | 22.774 | 1.00 |
| 9.94  |     |     | H   |    |        |        |        |      |
| ATOM  | 153 | HG1 | GLU | 13 | 13.160 | -0.442 | 25.165 | 1.00 |
| 66.02 |     |     | H   |    |        |        |        |      |
| ATOM  | 154 | HG2 | GLU | 13 | 11.555 | 0.144  | 24.738 | 1.00 |
| 56.23 |     |     | H   |    |        |        |        |      |
| ATOM  | 155 | N   | CYS | 14 | 13.729 | 3.284  | 21.694 | 1.00 |
| 9.12  |     |     | N   |    |        |        |        |      |
| ATOM  | 156 | CA  | CYS | 14 | 14.426 | 3.940  | 20.584 | 1.00 |
| 10.69 |     |     | C   |    |        |        |        |      |
| ATOM  | 157 | C   | CYS | 14 | 15.856 | 3.424  | 20.460 | 1.00 |
| 9.56  |     |     | C   |    |        |        |        |      |
| ATOM  | 158 | O   | CYS | 14 | 16.431 | 2.922  | 21.425 | 1.00 |
| 13.62 |     |     | O   |    |        |        |        |      |
| ATOM  | 159 | CB  | CYS | 14 | 14.455 | 5.449  | 20.821 | 1.00 |
| 13.96 |     |     | C   |    |        |        |        |      |
| ATOM  | 160 | SG  | CYS | 14 | 15.427 | 6.251  | 19.520 | 1.00 |
| 42.96 |     |     | S   |    |        |        |        |      |
| ATOM  | 161 | HN  | CYS | 14 | 13.954 | 3.541  | 22.614 | 1.00 |
| 9.76  |     |     | H   |    |        |        |        |      |
| ATOM  | 162 | HA  | CYS | 14 | 13.901 | 3.745  | 19.658 | 1.00 |
| 15.54 |     |     | H   |    |        |        |        |      |
| ATOM  | 163 | HB1 | CYS | 14 | 14.903 | 5.650  | 21.783 | 1.00 |
| 50.72 |     |     | H   |    |        |        |        |      |
| ATOM  | 164 | HB2 | CYS | 14 | 13.446 | 5.836  | 20.808 | 1.00 |
| 46.13 |     |     | H   |    |        |        |        |      |
| ATOM  | 165 | N   | CYS | 15 | 16.425 | 3.559  | 19.265 | 1.00 |
| 9.60  |     |     | N   |    |        |        |        |      |
| ATOM  | 166 | CA  | CYS | 15 | 17.793 | 3.114  | 19.010 | 1.00 |
| 9.28  |     |     | C   |    |        |        |        |      |
| ATOM  | 167 | C   | CYS | 15 | 18.439 | 4.024  | 17.976 | 1.00 |
| 9.92  |     |     | C   |    |        |        |        |      |
| ATOM  | 168 | O   | CYS | 15 | 17.891 | 4.227  | 16.892 | 1.00 |
| 13.31 |     |     | O   |    |        |        |        |      |
| ATOM  | 169 | CB  | CYS | 15 | 17.789 | 1.673  | 18.493 | 1.00 |
| 12.90 |     |     | C   |    |        |        |        |      |
| ATOM  | 170 | SG  | CYS | 15 | 19.494 | 1.089  | 18.298 | 1.00 |
| 39.11 |     |     | S   |    |        |        |        |      |
| ATOM  | 171 | HN  | CYS | 15 | 15.918 | 3.974  | 18.535 | 1.00 |
| 13.12 |     |     | H   |    |        |        |        |      |
| ATOM  | 172 | HA  | CYS | 15 | 18.365 | 3.159  | 19.928 | 1.00 |
| 8.26  |     |     | H   |    |        |        |        |      |
| ATOM  | 173 | HB1 | CYS | 15 | 17.287 | 1.636  | 17.537 | 1.00 |
| 24.82 |     |     | H   |    |        |        |        |      |
| ATOM  | 174 | HB2 | CYS | 15 | 17.271 | 1.040  | 19.196 | 1.00 |
| 27.31 |     |     | H   |    |        |        |        |      |
| ATOM  | 175 | N   | VAL | 16 | 19.603 | 4.576  | 18.308 | 1.00 |

|            |     |      |     |     |        |       |        |      |  |
|------------|-----|------|-----|-----|--------|-------|--------|------|--|
| 9.56       |     |      | N   |     |        |       |        |      |  |
| ATOM       | 176 | CA   | VAL | 16  | 20.299 | 5.465 | 17.386 | 1.00 |  |
| 11.99      |     |      | C   |     |        |       |        |      |  |
| ATOM       | 177 | C    | VAL | 16  | 21.801 | 5.388 | 17.622 | 1.00 |  |
| 7.73       |     |      | C   |     |        |       |        |      |  |
| ATOM       | 178 | O    | VAL | 16  | 22.264 | 5.450 | 18.760 | 1.00 |  |
| 8.83       |     |      | O   |     |        |       |        |      |  |
| ATOM       | 179 | CB   | VAL | 16  | 19.803 | 6.900 | 17.579 | 1.00 |  |
| 18.37      |     |      | C   |     |        |       |        |      |  |
| ATOM       | 180 | CG1  | VAL | 16  | 20.101 | 7.364 | 19.005 | 1.00 |  |
| 39.61      |     |      | C   |     |        |       |        |      |  |
| ATOM       | 181 | CG2  | VAL | 16  | 20.507 | 7.818 | 16.583 |      |  |
| 1.00115.21 |     |      |     | C   |        |       |        |      |  |
| ATOM       | 182 | HN   | VAL | 16  | 20.002 | 4.385 | 19.187 | 1.00 |  |
| 9.76       |     |      | H   |     |        |       |        |      |  |
| ATOM       | 183 | HA   | VAL | 16  | 20.093 | 5.158 | 16.370 | 1.00 |  |
| 17.27      |     |      | H   |     |        |       |        |      |  |
| ATOM       | 184 | HB   | VAL | 16  | 18.736 | 6.935 | 17.408 | 1.00 |  |
| 52.63      |     |      | H   |     |        |       |        |      |  |
| ATOM       | 185 | HG11 | VAL | 16  | 19.599 | 8.302 | 19.191 |      |  |
| 1.00128.07 |     |      |     | H   |        |       |        |      |  |
| ATOM       | 186 | HG12 | VAL | 16  | 21.166 | 7.497 | 19.126 |      |  |
| 1.00154.13 |     |      |     | H   |        |       |        |      |  |
| ATOM       | 187 | HG13 | VAL | 16  | 19.749 | 6.622 | 19.705 |      |  |
| 1.00135.74 |     |      |     | H   |        |       |        |      |  |
| ATOM       | 188 | HG21 | VAL | 16  | 20.382 | 7.427 | 15.584 |      |  |
| 1.00229.05 |     |      |     | H   |        |       |        |      |  |
| ATOM       | 189 | HG22 | VAL | 16  | 21.561 | 7.869 | 16.819 |      |  |
| 1.00261.82 |     |      |     | H   |        |       |        |      |  |
| ATOM       | 190 | HG23 | VAL | 16  | 20.077 | 8.806 | 16.639 |      |  |
| 1.00210.07 |     |      |     | H   |        |       |        |      |  |
| ATOM       | 191 | N    | ASP | 17  | 22.559 | 5.232 | 16.539 | 1.00 |  |
| 14.34      |     |      | N   |     |        |       |        |      |  |
| ATOM       | 192 | CA   | ASP | 17  | 24.014 | 5.126 | 16.639 | 1.00 |  |
| 11.90      |     |      | C   |     |        |       |        |      |  |
| ATOM       | 193 | C    | ASP | 17  | 24.693 | 6.439 | 16.276 | 1.00 |  |
| 13.15      |     |      | C   |     |        |       |        |      |  |
| ATOM       | 194 | O    | ASP | 17  | 24.585 | 6.919 | 15.148 | 1.00 |  |
| 25.96      |     |      | O   |     |        |       |        |      |  |
| ATOM       | 195 | CB   | ASP | 17  | 24.518 | 4.022 | 15.708 | 1.00 |  |
| 20.80      |     |      | C   |     |        |       |        |      |  |
| ATOM       | 196 | CG   | ASP | 17  | 24.106 | 2.657 | 16.249 | 1.00 |  |
| 28.72      |     |      | C   |     |        |       |        |      |  |
| ATOM       | 197 | OD1  | ASP | 17  | 24.193 | 1.695 | 15.504 |      |  |
| 1.00135.42 |     |      |     | O   |        |       |        |      |  |
| ATOM       | 198 | OD2  | ASP | 17  | 23.711 | 2.593 | 17.401 |      |  |
| 1.00114.17 |     |      |     | O1- |        |       |        |      |  |
| ATOM       | 199 | HN   | ASP | 17  | 22.133 | 5.174 | 15.658 | 1.00 |  |
| 28.29      |     |      | H   |     |        |       |        |      |  |
| ATOM       | 200 | HA   | ASP | 17  | 24.284 | 4.866 | 17.651 | 1.00 |  |
| 10.49      |     |      | H   |     |        |       |        |      |  |
| ATOM       | 201 | HB1  | ASP | 17  | 25.596 | 4.071 | 15.644 | 1.00 |  |



|            |     |      |     |    |        |        |        |      |
|------------|-----|------|-----|----|--------|--------|--------|------|
| 22.42      |     |      | H   |    |        |        |        |      |
| ATOM       | 202 | HB2  | ASP | 17 | 24.093 | 4.162  | 14.724 | 1.00 |
| 29.52      |     |      | H   |    |        |        |        |      |
| ATOM       | 203 | N    | THR | 18 | 25.417 | 6.999  | 17.242 | 1.00 |
| 11.55      |     |      | N   |    |        |        |        |      |
| ATOM       | 204 | CA   | THR | 18 | 26.151 | 8.245  | 17.031 | 1.00 |
| 17.10      |     |      | C   |    |        |        |        |      |
| ATOM       | 205 | C    | THR | 18 | 27.619 | 7.925  | 16.791 | 1.00 |
| 10.63      |     |      | C   |    |        |        |        |      |
| ATOM       | 206 | O    | THR | 18 | 28.081 | 6.837  | 17.128 | 1.00 |
| 6.49       |     |      | O   |    |        |        |        |      |
| ATOM       | 207 | CB   | THR | 18 | 26.016 | 9.154  | 18.263 | 1.00 |
| 28.52      |     |      | C   |    |        |        |        |      |
| ATOM       | 208 | CG2  | THR | 18 | 24.688 | 9.908  | 18.219 | 1.00 |
| 45.38      |     |      | C   |    |        |        |        |      |
| ATOM       | 209 | OG1  | THR | 18 | 26.072 | 8.360  | 19.436 | 1.00 |
| 26.49      |     |      | O   |    |        |        |        |      |
| ATOM       | 210 | HN   | THR | 18 | 25.475 | 6.553  | 18.111 | 1.00 |
| 13.96      |     |      | H   |    |        |        |        |      |
| ATOM       | 211 | HA   | THR | 18 | 25.757 | 8.760  | 16.164 | 1.00 |
| 26.43      |     |      | H   |    |        |        |        |      |
| ATOM       | 212 | HB   | THR | 18 | 26.826 | 9.870  | 18.278 | 1.00 |
| 37.43      |     |      | H   |    |        |        |        |      |
| ATOM       | 213 | HG1  | THR | 18 | 25.173 | 8.211  | 19.737 | 1.00 |
| 71.62      |     |      | H   |    |        |        |        |      |
| ATOM       | 214 | HG21 | THR | 18 | 24.761 | 10.720 | 17.511 |      |
| 1.00100.44 |     |      | H   |    |        |        |        |      |
| ATOM       | 215 | HG22 | THR | 18 | 24.468 | 10.304 | 19.200 |      |
| 1.00129.42 |     |      | H   |    |        |        |        |      |
| ATOM       | 216 | HG23 | THR | 18 | 23.900 | 9.235  | 17.916 |      |
| 1.00156.21 |     |      | H   |    |        |        |        |      |
| ATOM       | 217 | N    | VAL | 19 | 28.343 | 8.882  | 16.226 | 1.00 |
| 16.32      |     |      | N   |    |        |        |        |      |
| ATOM       | 218 | CA   | VAL | 19 | 29.748 | 8.710  | 15.954 | 1.00 |
| 13.34      |     |      | C   |    |        |        |        |      |
| ATOM       | 219 | C    | VAL | 19 | 30.282 | 9.951  | 15.276 | 1.00 |
| 25.88      |     |      | C   |    |        |        |        |      |
| ATOM       | 220 | O    | VAL | 19 | 29.859 | 10.326 | 14.184 | 1.00 |
| 42.11      |     |      | O   |    |        |        |        |      |
| ATOM       | 221 | CB   | VAL | 19 | 30.016 | 7.493  | 15.071 | 1.00 |
| 15.48      |     |      | C   |    |        |        |        |      |
| ATOM       | 222 | CG1  | VAL | 19 | 29.145 | 7.552  | 13.811 | 1.00 |
| 29.06      |     |      | C   |    |        |        |        |      |
| ATOM       | 223 | CG2  | VAL | 19 | 31.500 | 7.485  | 14.670 | 1.00 |
| 20.67      |     |      | C   |    |        |        |        |      |
| ATOM       | 224 | HN   | VAL | 19 | 27.930 | 9.735  | 16.001 | 1.00 |
| 26.89      |     |      | H   |    |        |        |        |      |
| ATOM       | 225 | HA   | VAL | 19 | 30.267 | 8.577  | 16.893 | 1.00 |
| 8.08       |     |      | H   |    |        |        |        |      |
| ATOM       | 226 | HB   | VAL | 19 | 29.791 | 6.599  | 15.623 | 1.00 |
| 11.49      |     |      | H   |    |        |        |        |      |
| ATOM       | 227 | HG11 | VAL | 19 | 29.562 | 8.263  | 13.113 |      |

|            |     |      |     |   |    |        |        |        |      |
|------------|-----|------|-----|---|----|--------|--------|--------|------|
| 1.00137.43 |     |      |     | H |    |        |        |        |      |
| ATOM       | 228 | HG12 | VAL |   | 19 | 28.143 | 7.852  | 14.076 | 1.00 |
| 93.29      |     |      |     | H |    |        |        |        |      |
| ATOM       | 229 | HG13 | VAL |   | 19 | 29.116 | 6.574  | 13.350 |      |
| 1.00108.69 |     |      |     | H |    |        |        |        |      |
| ATOM       | 230 | HG21 | VAL |   | 19 | 32.107 | 7.725  | 15.534 | 1.00 |
| 99.42      |     |      |     | H |    |        |        |        |      |
| ATOM       | 231 | HG22 | VAL |   | 19 | 31.668 | 8.228  | 13.903 |      |
| 1.00111.36 |     |      |     | H |    |        |        |        |      |
| ATOM       | 232 | HG23 | VAL |   | 19 | 31.769 | 6.511  | 14.296 | 1.00 |
| 77.11      |     |      |     | H |    |        |        |        |      |
| ATOM       | 233 | N    | PHE |   | 20 | 31.215 | 10.571 | 15.949 | 1.00 |
| 24.58      |     |      |     | N |    |        |        |        |      |
| ATOM       | 234 | CA   | PHE |   | 20 | 31.848 | 11.778 | 15.453 | 1.00 |
| 40.34      |     |      |     | C |    |        |        |        |      |
| ATOM       | 235 | C    | PHE |   | 20 | 33.073 | 11.425 | 14.622 | 1.00 |
| 40.37      |     |      |     | C |    |        |        |        |      |
| ATOM       | 236 | O    | PHE |   | 20 | 33.135 | 11.733 | 13.432 | 1.00 |
| 66.02      |     |      |     | O |    |        |        |        |      |
| ATOM       | 237 | CB   | PHE |   | 20 | 32.239 | 12.690 | 16.632 | 1.00 |
| 48.79      |     |      |     | C |    |        |        |        |      |
| ATOM       | 238 | CG   | PHE |   | 20 | 32.454 | 11.886 | 17.909 | 1.00 |
| 35.75      |     |      |     | C |    |        |        |        |      |
| ATOM       | 239 | CD1  | PHE |   | 20 | 31.384 | 11.200 | 18.519 | 1.00 |
| 30.20      |     |      |     | C |    |        |        |        |      |
| ATOM       | 240 | CD2  | PHE |   | 20 | 33.726 | 11.851 | 18.501 | 1.00 |
| 40.95      |     |      |     | C |    |        |        |        |      |
| ATOM       | 241 | CE1  | PHE |   | 20 | 31.597 | 10.484 | 19.700 | 1.00 |
| 30.41      |     |      |     | C |    |        |        |        |      |
| ATOM       | 242 | CE2  | PHE |   | 20 | 33.931 | 11.131 | 19.682 | 1.00 |
| 45.84      |     |      |     | C |    |        |        |        |      |
| ATOM       | 243 | CZ   | PHE |   | 20 | 32.869 | 10.448 | 20.281 | 1.00 |
| 40.81      |     |      |     | C |    |        |        |        |      |
| ATOM       | 244 | HN   | PHE |   | 20 | 31.483 | 10.202 | 16.806 | 1.00 |
| 16.73      |     |      |     | H |    |        |        |        |      |
| ATOM       | 245 | HA   | PHE |   | 20 | 31.149 | 12.309 | 14.818 | 1.00 |
| 59.91      |     |      |     | H |    |        |        |        |      |
| ATOM       | 246 | HB1  | PHE |   | 20 | 31.453 | 13.391 | 16.796 | 1.00 |
| 67.15      |     |      |     | H |    |        |        |        |      |
| ATOM       | 247 | HB2  | PHE |   | 20 | 33.142 | 13.234 | 16.393 | 1.00 |
| 58.17      |     |      |     | H |    |        |        |        |      |
| ATOM       | 248 | HD1  | PHE |   | 20 | 30.396 | 11.211 | 18.075 | 1.00 |
| 33.34      |     |      |     | H |    |        |        |        |      |
| ATOM       | 249 | HD2  | PHE |   | 20 | 34.547 | 12.381 | 18.045 | 1.00 |
| 49.35      |     |      |     | H |    |        |        |        |      |
| ATOM       | 250 | HE1  | PHE |   | 20 | 30.776 | 9.962  | 20.163 | 1.00 |
| 30.61      |     |      |     | H |    |        |        |        |      |
| ATOM       | 251 | HE2  | PHE |   | 20 | 34.913 | 11.102 | 20.133 | 1.00 |
| 61.27      |     |      |     | H |    |        |        |        |      |
| ATOM       | 252 | HZ   | PHE |   | 20 | 33.028 | 9.894  | 21.195 | 1.00 |
| 52.66      |     |      |     | H |    |        |        |        |      |
| ATOM       | 253 | N    | GLU |   | 21 | 34.057 | 10.796 | 15.259 | 1.00 |

|            |     |     |     |     |        |        |        |      |  |
|------------|-----|-----|-----|-----|--------|--------|--------|------|--|
| 41.31      |     |     | N   |     |        |        |        |      |  |
| ATOM       | 254 | CA  | GLU | 21  | 35.281 | 10.427 | 14.594 | 1.00 |  |
| 56.16      |     |     | C   |     |        |        |        |      |  |
| ATOM       | 255 | C   | GLU | 21  | 35.462 | 8.916  | 14.598 | 1.00 |  |
| 58.61      |     |     | C   |     |        |        |        |      |  |
| ATOM       | 256 | O   | GLU | 21  | 34.568 | 8.172  | 15.000 |      |  |
| 1.00201.19 |     |     |     | O   |        |        |        |      |  |
| ATOM       | 257 | CB  | GLU | 21  | 36.409 | 11.089 | 15.351 | 1.00 |  |
| 57.37      |     |     | C   |     |        |        |        |      |  |
| ATOM       | 258 | CG  | GLU | 21  | 36.485 | 10.503 | 16.759 |      |  |
| 1.00193.56 |     |     |     | C   |        |        |        |      |  |
| ATOM       | 259 | CD  | GLU | 21  | 37.379 | 11.372 | 17.634 |      |  |
| 1.00304.62 |     |     |     | C   |        |        |        |      |  |
| ATOM       | 260 | OE1 | GLU | 21  | 37.504 | 11.066 | 18.809 |      |  |
| 1.00451.81 |     |     |     | O   |        |        |        |      |  |
| ATOM       | 261 | OE2 | GLU | 21  | 37.929 | 12.332 | 17.119 |      |  |
| 1.00442.88 |     |     |     | O1- |        |        |        |      |  |
| ATOM       | 262 | HN  | GLU | 21  | 33.973 | 10.594 | 16.211 | 1.00 |  |
| 50.82      |     |     | H   |     |        |        |        |      |  |
| ATOM       | 263 | HA  | GLU | 21  | 35.283 | 10.787 | 13.574 | 1.00 |  |
| 85.72      |     |     | H   |     |        |        |        |      |  |
| ATOM       | 264 | HB1 | GLU | 21  | 36.211 | 12.145 | 15.417 | 1.00 |  |
| 46.37      |     |     | H   |     |        |        |        |      |  |
| ATOM       | 265 | HB2 | GLU | 21  | 37.329 | 10.920 | 14.837 |      |  |
| 1.00131.81 |     |     |     | H   |        |        |        |      |  |
| ATOM       | 266 | HG1 | GLU | 21  | 36.890 | 9.507  | 16.703 |      |  |
| 1.00314.91 |     |     |     | H   |        |        |        |      |  |
| ATOM       | 267 | HG2 | GLU | 21  | 35.495 | 10.459 | 17.185 |      |  |
| 1.00266.92 |     |     |     | H   |        |        |        |      |  |
| ATOM       | 268 | N   | GLY | 22  | 36.625 | 8.474  | 14.142 | 1.00 |  |
| 86.70      |     |     | N   |     |        |        |        |      |  |
| ATOM       | 269 | CA  | GLY | 22  | 36.925 | 7.044  | 14.088 |      |  |
| 1.00104.66 |     |     |     | C   |        |        |        |      |  |
| ATOM       | 270 | C   | GLY | 22  | 37.556 | 6.559  | 15.390 | 1.00 |  |
| 71.50      |     |     | C   |     |        |        |        |      |  |
| ATOM       | 271 | O   | GLY | 22  | 37.553 | 5.363  | 15.684 | 1.00 |  |
| 89.87      |     |     | O   |     |        |        |        |      |  |
| ATOM       | 272 | HN  | GLY | 22  | 37.294 | 9.124  | 13.838 |      |  |
| 1.00214.64 |     |     |     | H   |        |        |        |      |  |
| ATOM       | 273 | HA1 | GLY | 22  | 37.612 | 6.860  | 13.276 |      |  |
| 1.00152.47 |     |     |     | H   |        |        |        |      |  |
| ATOM       | 274 | HA2 | GLY | 22  | 36.012 | 6.491  | 13.909 |      |  |
| 1.00118.15 |     |     |     | H   |        |        |        |      |  |
| ATOM       | 275 | N   | ASP | 23  | 38.107 | 7.491  | 16.159 | 1.00 |  |
| 44.68      |     |     | N   |     |        |        |        |      |  |
| ATOM       | 276 | CA  | ASP | 23  | 38.753 | 7.144  | 17.421 | 1.00 |  |
| 43.33      |     |     | C   |     |        |        |        |      |  |
| ATOM       | 277 | C   | ASP | 23  | 37.754 | 6.577  | 18.424 | 1.00 |  |
| 37.55      |     |     | C   |     |        |        |        |      |  |
| ATOM       | 278 | O   | ASP | 23  | 38.068 | 5.641  | 19.161 | 1.00 |  |
| 61.37      |     |     | O   |     |        |        |        |      |  |
| ATOM       | 279 | CB  | ASP | 23  | 39.417 | 8.383  | 18.022 | 1.00 |  |

|            |     |     |     |    |        |       |        |      |  |
|------------|-----|-----|-----|----|--------|-------|--------|------|--|
| 40.74      |     |     | C   |    |        |       |        |      |  |
| ATOM       | 280 | CG  | ASP | 23 | 40.637 | 8.775 | 17.193 |      |  |
| 1.00141.86 |     |     | C   |    |        |       |        |      |  |
| ATOM       | 281 | OD1 | ASP | 23 | 41.063 | 7.969 | 16.384 |      |  |
| 1.00328.18 |     |     | O   |    |        |       |        |      |  |
| ATOM       | 282 | OD2 | ASP | 23 | 41.127 | 9.877 | 17.382 |      |  |
| 1.00304.58 |     |     | O1- |    |        |       |        |      |  |
| ATOM       | 283 | HN  | ASP | 23 | 38.087 | 8.427 | 15.870 | 1.00 |  |
| 40.86      |     |     | H   |    |        |       |        |      |  |
| ATOM       | 284 | HA  | ASP | 23 | 39.511 | 6.405 | 17.232 | 1.00 |  |
| 72.12      |     |     | H   |    |        |       |        |      |  |
| ATOM       | 285 | HB1 | ASP | 23 | 39.727 | 8.170 | 19.033 | 1.00 |  |
| 94.15      |     |     | H   |    |        |       |        |      |  |
| ATOM       | 286 | HB2 | ASP | 23 | 38.711 | 9.198 | 18.031 | 1.00 |  |
| 93.26      |     |     | H   |    |        |       |        |      |  |
| ATOM       | 287 | N   | MET | 24 | 36.562 | 7.163 | 18.468 | 1.00 |  |
| 23.24      |     |     | N   |    |        |       |        |      |  |
| ATOM       | 288 | CA  | MET | 24 | 35.527 | 6.724 | 19.411 | 1.00 |  |
| 32.50      |     |     | C   |    |        |       |        |      |  |
| ATOM       | 289 | C   | MET | 24 | 34.157 | 6.655 | 18.748 | 1.00 |  |
| 25.13      |     |     | C   |    |        |       |        |      |  |
| ATOM       | 290 | O   | MET | 24 | 33.876 | 7.377 | 17.791 | 1.00 |  |
| 54.40      |     |     | O   |    |        |       |        |      |  |
| ATOM       | 291 | CB  | MET | 24 | 35.457 | 7.700 | 20.583 | 1.00 |  |
| 47.36      |     |     | C   |    |        |       |        |      |  |
| ATOM       | 292 | CG  | MET | 24 | 36.729 | 7.596 | 21.424 |      |  |
| 1.00151.73 |     |     | C   |    |        |       |        |      |  |
| ATOM       | 293 | SD  | MET | 24 | 36.748 | 8.928 | 22.648 |      |  |
| 1.00209.23 |     |     | S   |    |        |       |        |      |  |
| ATOM       | 294 | CE  | MET | 24 | 35.313 | 8.380 | 23.606 |      |  |
| 1.00243.29 |     |     | C   |    |        |       |        |      |  |
| ATOM       | 295 | HN  | MET | 24 | 36.379 | 7.915 | 17.869 | 1.00 |  |
| 17.32      |     |     | H   |    |        |       |        |      |  |
| ATOM       | 296 | HA  | MET | 24 | 35.777 | 5.743 | 19.793 | 1.00 |  |
| 48.94      |     |     | H   |    |        |       |        |      |  |
| ATOM       | 297 | HB1 | MET | 24 | 34.601 | 7.462 | 21.199 |      |  |
| 1.00124.40 |     |     | H   |    |        |       |        |      |  |
| ATOM       | 298 | HB2 | MET | 24 | 35.357 | 8.708 | 20.206 |      |  |
| 1.00166.96 |     |     | H   |    |        |       |        |      |  |
| ATOM       | 299 | HG1 | MET | 24 | 37.591 | 7.686 | 20.782 |      |  |
| 1.00331.71 |     |     | H   |    |        |       |        |      |  |
| ATOM       | 300 | HG2 | MET | 24 | 36.751 | 6.640 | 21.926 |      |  |
| 1.00302.30 |     |     | H   |    |        |       |        |      |  |
| ATOM       | 301 | HE1 | MET | 24 | 34.409 | 8.756 | 23.144 |      |  |
| 1.00340.44 |     |     | H   |    |        |       |        |      |  |
| ATOM       | 302 | HE2 | MET | 24 | 35.383 | 8.759 | 24.612 |      |  |
| 1.00373.88 |     |     | H   |    |        |       |        |      |  |
| ATOM       | 303 | HE3 | MET | 24 | 35.288 | 7.300 | 23.631 |      |  |
| 1.00386.81 |     |     | H   |    |        |       |        |      |  |
| ATOM       | 304 | N   | VAL | 25 | 33.297 | 5.790 | 19.289 | 1.00 |  |
| 22.44      |     |     | N   |    |        |       |        |      |  |
| ATOM       | 305 | CA  | VAL | 25 | 31.934 | 5.627 | 18.782 | 1.00 |  |

|            |     |      |     |    |        |       |        |      |   |
|------------|-----|------|-----|----|--------|-------|--------|------|---|
| 15.37      |     |      | C   |    |        |       |        |      |   |
| ATOM       | 306 | C    | VAL | 25 | 30.939 | 5.664 | 19.935 | 1.00 |   |
| 17.47      |     |      | C   |    |        |       |        |      |   |
| ATOM       | 307 | O    | VAL | 25 | 31.212 | 5.155 | 21.023 | 1.00 |   |
| 29.52      |     |      | O   |    |        |       |        |      |   |
| ATOM       | 308 | CB   | VAL | 25 | 31.784 | 4.310 | 18.020 | 1.00 |   |
| 23.36      |     |      | C   |    |        |       |        |      |   |
| ATOM       | 309 | CG1  | VAL | 25 | 30.313 | 4.132 | 17.607 | 1.00 |   |
| 58.39      |     |      | C   |    |        |       |        |      |   |
| ATOM       | 310 | CG2  | VAL | 25 | 32.670 | 4.343 | 16.772 | 1.00 |   |
| 55.25      |     |      | C   |    |        |       |        |      |   |
| ATOM       | 311 | HN   | VAL | 25 | 33.583 | 5.258 | 20.060 | 1.00 |   |
| 48.11      |     |      | H   |    |        |       |        |      |   |
| ATOM       | 312 | HA   | VAL | 25 | 31.704 | 6.442 | 18.107 | 1.00 |   |
| 9.25       |     |      | H   |    |        |       |        |      |   |
| ATOM       | 313 | HB   | VAL | 25 | 32.080 | 3.488 | 18.659 | 1.00 |   |
| 52.45      |     |      | H   |    |        |       |        |      |   |
| ATOM       | 314 | HG11 | VAL | 25 | 29.758 | 3.712 | 18.431 |      |   |
| 1.00171.07 |     |      |     |    |        |       |        |      | H |
| ATOM       | 315 | HG12 | VAL | 25 | 30.247 | 3.470 | 16.757 |      |   |
| 1.00166.22 |     |      |     |    |        |       |        |      | H |
| ATOM       | 316 | HG13 | VAL | 25 | 29.889 | 5.094 | 17.348 |      |   |
| 1.00134.76 |     |      |     |    |        |       |        |      | H |
| ATOM       | 317 | HG21 | VAL | 25 | 32.710 | 3.355 | 16.334 |      |   |
| 1.00141.88 |     |      |     |    |        |       |        |      | H |
| ATOM       | 318 | HG22 | VAL | 25 | 33.667 | 4.654 | 17.046 |      |   |
| 1.00184.50 |     |      |     |    |        |       |        |      | H |
| ATOM       | 319 | HG23 | VAL | 25 | 32.258 | 5.038 | 16.056 |      |   |
| 1.00133.90 |     |      |     |    |        |       |        |      | H |
| ATOM       | 320 | N    | THR | 26 | 29.789 | 6.284 | 19.691 | 1.00 |   |
| 13.60      |     |      | N   |    |        |       |        |      |   |
| ATOM       | 321 | CA   | THR | 26 | 28.745 | 6.413 | 20.709 | 1.00 |   |
| 21.19      |     |      | C   |    |        |       |        |      |   |
| ATOM       | 322 | C    | THR | 26 | 27.420 | 5.831 | 20.220 | 1.00 |   |
| 16.55      |     |      | C   |    |        |       |        |      |   |
| ATOM       | 323 | O    | THR | 26 | 26.994 | 6.088 | 19.094 | 1.00 |   |
| 11.43      |     |      | O   |    |        |       |        |      |   |
| ATOM       | 324 | CB   | THR | 26 | 28.567 | 7.895 | 21.036 | 1.00 |   |
| 27.07      |     |      | C   |    |        |       |        |      |   |
| ATOM       | 325 | CG2  | THR | 26 | 27.456 | 8.081 | 22.073 | 1.00 |   |
| 44.39      |     |      | C   |    |        |       |        |      |   |
| ATOM       | 326 | OG1  | THR | 26 | 29.786 | 8.400 | 21.560 | 1.00 |   |
| 34.75      |     |      | O   |    |        |       |        |      |   |
| ATOM       | 327 | HN   | THR | 26 | 29.640 | 6.678 | 18.805 | 1.00 |   |
| 10.81      |     |      | H   |    |        |       |        |      |   |
| ATOM       | 328 | HA   | THR | 26 | 29.044 | 5.893 | 21.608 | 1.00 |   |
| 33.16      |     |      | H   |    |        |       |        |      |   |
| ATOM       | 329 | HB   | THR | 26 | 28.314 | 8.428 | 20.130 | 1.00 |   |
| 20.60      |     |      | H   |    |        |       |        |      |   |
| ATOM       | 330 | HG1  | THR | 26 | 30.201 | 7.701 | 22.071 | 1.00 |   |
| 77.72      |     |      | H   |    |        |       |        |      |   |
| ATOM       | 331 | HG21 | THR | 26 | 27.670 | 7.472 | 22.941 |      |   |

|            |     |      |     |     |    |        |       |        |      |
|------------|-----|------|-----|-----|----|--------|-------|--------|------|
| 1.00126.99 |     |      |     | H   |    |        |       |        |      |
| ATOM       | 332 | HG22 | THR |     | 26 | 26.508 | 7.785 | 21.653 |      |
| 1.00108.32 |     |      |     | H   |    |        |       |        |      |
| ATOM       | 333 | HG23 | THR |     | 26 | 27.411 | 9.118 | 22.365 |      |
| 1.00151.99 |     |      |     | H   |    |        |       |        |      |
| ATOM       | 334 | N    | ARG |     | 27 | 26.769 | 5.051 | 21.085 | 1.00 |
| 22.38      |     |      |     | N   |    |        |       |        |      |
| ATOM       | 335 | CA   | ARG |     | 27 | 25.482 | 4.431 | 20.758 | 1.00 |
| 20.21      |     |      |     | C   |    |        |       |        |      |
| ATOM       | 336 | C    | ARG |     | 27 | 24.468 | 4.726 | 21.860 | 1.00 |
| 16.96      |     |      |     | C   |    |        |       |        |      |
| ATOM       | 337 | O    | ARG |     | 27 | 24.836 | 4.838 | 23.030 | 1.00 |
| 20.06      |     |      |     | O   |    |        |       |        |      |
| ATOM       | 338 | CB   | ARG |     | 27 | 25.654 | 2.917 | 20.616 | 1.00 |
| 22.14      |     |      |     | C   |    |        |       |        |      |
| ATOM       | 339 | CG   | ARG |     | 27 | 26.624 | 2.614 | 19.472 |      |
| 1.00124.30 |     |      |     | C   |    |        |       |        |      |
| ATOM       | 340 | CD   | ARG |     | 27 | 26.681 | 1.104 | 19.238 |      |
| 1.00109.38 |     |      |     | C   |    |        |       |        |      |
| ATOM       | 341 | NE   | ARG |     | 27 | 27.597 | 0.797 | 18.144 |      |
| 1.00227.73 |     |      |     | N   |    |        |       |        |      |
| ATOM       | 342 | CZ   | ARG |     | 27 | 28.908 | 0.707 | 18.346 |      |
| 1.00426.12 |     |      |     | C   |    |        |       |        |      |
| ATOM       | 343 | NH1  | ARG |     | 27 | 29.704 | 0.433 | 17.348 |      |
| 1.00767.09 |     |      |     | N1+ |    |        |       |        |      |
| ATOM       | 344 | NH2  | ARG |     | 27 | 29.398 | 0.892 | 19.541 |      |
| 1.00581.78 |     |      |     | N   |    |        |       |        |      |
| ATOM       | 345 | HN   | ARG |     | 27 | 27.161 | 4.893 | 21.970 | 1.00 |
| 30.75      |     |      |     | H   |    |        |       |        |      |
| ATOM       | 346 | HA   | ARG |     | 27 | 25.110 | 4.830 | 19.825 | 1.00 |
| 23.13      |     |      |     | H   |    |        |       |        |      |
| ATOM       | 347 | HB1  | ARG |     | 27 | 24.697 | 2.463 | 20.405 | 1.00 |
| 87.46      |     |      |     | H   |    |        |       |        |      |
| ATOM       | 348 | HB2  | ARG |     | 27 | 26.047 | 2.512 | 21.538 |      |
| 1.00103.36 |     |      |     | H   |    |        |       |        |      |
| ATOM       | 349 | HG1  | ARG |     | 27 | 27.609 | 2.973 | 19.731 |      |
| 1.00281.97 |     |      |     | H   |    |        |       |        |      |
| ATOM       | 350 | HG2  | ARG |     | 27 | 26.284 | 3.105 | 18.573 |      |
| 1.00276.19 |     |      |     | H   |    |        |       |        |      |
| ATOM       | 351 | HD1  | ARG |     | 27 | 25.693 | 0.743 | 18.991 |      |
| 1.00183.60 |     |      |     | H   |    |        |       |        |      |
| ATOM       | 352 | HD2  | ARG |     | 27 | 27.024 | 0.614 | 20.138 |      |
| 1.00142.93 |     |      |     | H   |    |        |       |        |      |
| ATOM       | 353 | HE   | ARG |     | 27 | 27.238 | 0.657 | 17.243 |      |
| 1.00372.53 |     |      |     | H   |    |        |       |        |      |
| ATOM       | 354 | HH11 | ARG |     | 27 | 29.329 | 0.291 | 16.434 |      |
| 1.00910.59 |     |      |     | H   |    |        |       |        |      |
| ATOM       | 355 | HH12 | ARG |     | 27 | 30.690 | 0.364 | 17.501 |      |
| 1.00999.99 |     |      |     | H   |    |        |       |        |      |
| ATOM       | 356 | HH21 | ARG |     | 27 | 28.787 | 1.102 | 20.304 |      |
| 1.00532.54 |     |      |     | H   |    |        |       |        |      |
| ATOM       | 357 | HH22 | ARG |     | 27 | 30.384 | 0.823 | 19.693 |      |

|            |     |     |     |    |        |       |        |      |  |
|------------|-----|-----|-----|----|--------|-------|--------|------|--|
| 1.00948.84 |     |     |     | H  |        |       |        |      |  |
| ATOM       | 358 | N   | SER | 28 | 23.189 | 4.855 | 21.491 | 1.00 |  |
| 14.60      |     |     | N   |    |        |       |        |      |  |
| ATOM       | 359 | CA  | SER | 28 | 22.140 | 5.142 | 22.475 | 1.00 |  |
| 14.92      |     |     | C   |    |        |       |        |      |  |
| ATOM       | 360 | C   | SER | 28 | 20.936 | 4.233 | 22.260 | 1.00 |  |
| 12.12      |     |     | C   |    |        |       |        |      |  |
| ATOM       | 361 | O   | SER | 28 | 20.605 | 3.877 | 21.129 | 1.00 |  |
| 13.41      |     |     | O   |    |        |       |        |      |  |
| ATOM       | 362 | CB  | SER | 28 | 21.708 | 6.603 | 22.362 | 1.00 |  |
| 23.26      |     |     | C   |    |        |       |        |      |  |
| ATOM       | 363 | OG  | SER | 28 | 22.810 | 7.445 | 22.674 |      |  |
| 1.00146.32 |     |     |     | O  |        |       |        |      |  |
| ATOM       | 364 | HN  | SER | 28 | 22.943 | 4.757 | 20.544 | 1.00 |  |
| 15.23      |     |     | H   |    |        |       |        |      |  |
| ATOM       | 365 | HA  | SER | 28 | 22.524 | 4.972 | 23.472 | 1.00 |  |
| 15.44      |     |     | H   |    |        |       |        |      |  |
| ATOM       | 366 | HB1 | SER | 28 | 20.892 | 6.791 | 23.047 | 1.00 |  |
| 88.73      |     |     | H   |    |        |       |        |      |  |
| ATOM       | 367 | HB2 | SER | 28 | 21.383 | 6.808 | 21.356 |      |  |
| 1.00124.68 |     |     |     | H  |        |       |        |      |  |
| ATOM       | 368 | HG  | SER | 28 | 22.497 | 8.141 | 23.258 |      |  |
| 1.00242.47 |     |     |     | H  |        |       |        |      |  |
| ATOM       | 369 | N   | CYS | 29 | 20.285 | 3.865 | 23.358 | 1.00 |  |
| 10.48      |     |     | N   |    |        |       |        |      |  |
| ATOM       | 370 | CA  | CYS | 29 | 19.114 | 3.002 | 23.294 | 1.00 |  |
| 9.97       |     |     | C   |    |        |       |        |      |  |
| ATOM       | 371 | C   | CYS | 29 | 18.484 | 2.883 | 24.681 | 1.00 |  |
| 11.60      |     |     | C   |    |        |       |        |      |  |
| ATOM       | 372 | O   | CYS | 29 | 19.101 | 2.355 | 25.606 | 1.00 |  |
| 15.64      |     |     | O   |    |        |       |        |      |  |
| ATOM       | 373 | CB  | CYS | 29 | 19.510 | 1.612 | 22.770 | 1.00 |  |
| 9.52       |     |     | C   |    |        |       |        |      |  |
| ATOM       | 374 | SG  | CYS | 29 | 18.116 | 0.867 | 21.912 | 1.00 |  |
| 10.40      |     |     | S   |    |        |       |        |      |  |
| ATOM       | 375 | HN  | CYS | 29 | 20.595 | 4.188 | 24.230 | 1.00 |  |
| 11.10      |     |     | H   |    |        |       |        |      |  |
| ATOM       | 376 | HA  | CYS | 29 | 18.394 | 3.439 | 22.619 | 1.00 |  |
| 11.08      |     |     | H   |    |        |       |        |      |  |
| ATOM       | 377 | HB1 | CYS | 29 | 19.793 | 0.968 | 23.594 | 1.00 |  |
| 9.33       |     |     | H   |    |        |       |        |      |  |
| ATOM       | 378 | HB2 | CYS | 29 | 20.339 | 1.703 | 22.087 | 1.00 |  |
| 10.78      |     |     | H   |    |        |       |        |      |  |
| ATOM       | 379 | N   | GLU | 30 | 17.262 | 3.386 | 24.825 | 1.00 |  |
| 13.52      |     |     | N   |    |        |       |        |      |  |
| ATOM       | 380 | CA  | GLU | 30 | 16.574 | 3.338 | 26.111 | 1.00 |  |
| 17.41      |     |     | C   |    |        |       |        |      |  |
| ATOM       | 381 | C   | GLU | 30 | 15.860 | 2.003 | 26.300 | 1.00 |  |
| 10.81      |     |     | C   |    |        |       |        |      |  |
| ATOM       | 382 | O   | GLU | 30 | 15.509 | 1.330 | 25.331 | 1.00 |  |
| 23.22      |     |     | O   |    |        |       |        |      |  |
| ATOM       | 383 | CB  | GLU | 30 | 15.565 | 4.482 | 26.200 | 1.00 |  |

|            |     |     |     |    |        |        |        |      |  |
|------------|-----|-----|-----|----|--------|--------|--------|------|--|
| 37.83      |     |     | C   |    |        |        |        |      |  |
| ATOM       | 384 | CG  | GLU | 30 | 16.303 | 5.819  | 26.105 |      |  |
| 1.00108.13 |     |     | C   |    |        |        |        |      |  |
| ATOM       | 385 | CD  | GLU | 30 | 17.167 | 6.027  | 27.344 |      |  |
| 1.00240.52 |     |     | C   |    |        |        |        |      |  |
| ATOM       | 386 | OE1 | GLU | 30 | 18.070 | 6.846  | 27.281 |      |  |
| 1.00422.56 |     |     | O   |    |        |        |        |      |  |
| ATOM       | 387 | OE2 | GLU | 30 | 16.914 | 5.367  | 28.338 |      |  |
| 1.00410.81 |     |     | O1- |    |        |        |        |      |  |
| ATOM       | 388 | HN  | GLU | 30 | 16.817 | 3.803  | 24.055 | 1.00 |  |
| 15.61      |     |     | H   |    |        |        |        |      |  |
| ATOM       | 389 | HA  | GLU | 30 | 17.299 | 3.457  | 26.903 | 1.00 |  |
| 24.60      |     |     | H   |    |        |        |        |      |  |
| ATOM       | 390 | HB1 | GLU | 30 | 15.042 | 4.428  | 27.142 | 1.00 |  |
| 72.67      |     |     | H   |    |        |        |        |      |  |
| ATOM       | 391 | HB2 | GLU | 30 | 14.857 | 4.404  | 25.389 | 1.00 |  |
| 56.47      |     |     | H   |    |        |        |        |      |  |
| ATOM       | 392 | HG1 | GLU | 30 | 15.584 | 6.620  | 26.032 |      |  |
| 1.00196.66 |     |     | H   |    |        |        |        |      |  |
| ATOM       | 393 | HG2 | GLU | 30 | 16.931 | 5.818  | 25.226 |      |  |
| 1.00140.67 |     |     | H   |    |        |        |        |      |  |
| ATOM       | 394 | N   | LYS | 31 | 15.650 | 1.628  | 27.563 | 1.00 |  |
| 11.96      |     |     | N   |    |        |        |        |      |  |
| ATOM       | 395 | CA  | LYS | 31 | 14.972 | 0.371  | 27.897 | 1.00 |  |
| 11.40      |     |     | C   |    |        |        |        |      |  |
| ATOM       | 396 | C   | LYS | 31 | 13.739 | 0.659  | 28.747 | 1.00 |  |
| 10.99      |     |     | C   |    |        |        |        |      |  |
| ATOM       | 397 | O   | LYS | 31 | 13.745 | 1.569  | 29.575 | 1.00 |  |
| 12.86      |     |     | O   |    |        |        |        |      |  |
| ATOM       | 398 | CB  | LYS | 31 | 15.923 | -0.542 | 28.672 | 1.00 |  |
| 21.40      |     |     | C   |    |        |        |        |      |  |
| ATOM       | 399 | CG  | LYS | 31 | 17.125 | -0.895 | 27.793 | 1.00 |  |
| 57.81      |     |     | C   |    |        |        |        |      |  |
| ATOM       | 400 | CD  | LYS | 31 | 18.074 | -1.812 | 28.567 |      |  |
| 1.00115.52 |     |     | C   |    |        |        |        |      |  |
| ATOM       | 401 | CE  | LYS | 31 | 19.302 | -2.118 | 27.708 |      |  |
| 1.00250.23 |     |     | C   |    |        |        |        |      |  |
| ATOM       | 402 | NZ  | LYS | 31 | 18.881 | -2.853 | 26.482 |      |  |
| 1.00462.10 |     |     | N1+ |    |        |        |        |      |  |
| ATOM       | 403 | HN  | LYS | 31 | 15.955 | 2.212  | 28.289 | 1.00 |  |
| 26.13      |     |     | H   |    |        |        |        |      |  |
| ATOM       | 404 | HA  | LYS | 31 | 14.665 | -0.131 | 26.990 | 1.00 |  |
| 13.87      |     |     | H   |    |        |        |        |      |  |
| ATOM       | 405 | HB1 | LYS | 31 | 15.406 | -1.448 | 28.951 | 1.00 |  |
| 37.63      |     |     | H   |    |        |        |        |      |  |
| ATOM       | 406 | HB2 | LYS | 31 | 16.264 | -0.034 | 29.562 | 1.00 |  |
| 47.19      |     |     | H   |    |        |        |        |      |  |
| ATOM       | 407 | HG1 | LYS | 31 | 17.646 | 0.009  | 27.516 |      |  |
| 1.00126.32 |     |     | H   |    |        |        |        |      |  |
| ATOM       | 408 | HG2 | LYS | 31 | 16.783 | -1.400 | 26.902 |      |  |
| 1.00114.19 |     |     | H   |    |        |        |        |      |  |
| ATOM       | 409 | HD1 | LYS | 31 | 17.568 | -2.734 | 28.809 |      |  |



|            |     |      |     |   |    |        |        |        |      |  |
|------------|-----|------|-----|---|----|--------|--------|--------|------|--|
| 1.00198.45 |     |      |     | H |    |        |        |        |      |  |
| ATOM       | 410 | HD2  | LYS |   | 31 | 18.385 | -1.321 | 29.479 |      |  |
| 1.00200.14 |     |      |     | H |    |        |        |        |      |  |
| ATOM       | 411 | HE1  | LYS |   | 31 | 19.994 | -2.726 | 28.272 |      |  |
| 1.00374.64 |     |      |     | H |    |        |        |        |      |  |
| ATOM       | 412 | HE2  | LYS |   | 31 | 19.784 | -1.193 | 27.426 |      |  |
| 1.00403.27 |     |      |     | H |    |        |        |        |      |  |
| ATOM       | 413 | HZ1  | LYS |   | 31 | 18.562 | -2.175 | 25.762 |      |  |
| 1.00627.38 |     |      |     | H |    |        |        |        |      |  |
| ATOM       | 414 | HZ2  | LYS |   | 31 | 18.102 | -3.502 | 26.718 |      |  |
| 1.00622.26 |     |      |     | H |    |        |        |        |      |  |
| ATOM       | 415 | HZ3  | LYS |   | 31 | 19.684 | -3.398 | 26.110 |      |  |
| 1.00619.20 |     |      |     | H |    |        |        |        |      |  |
| ATOM       | 416 | N    | THR |   | 32 | 12.678 | -0.116 | 28.531 | 1.00 |  |
| 15.51      |     |      | N   |   |    |        |        |        |      |  |
| ATOM       | 417 | CA   | THR |   | 32 | 11.437 | 0.074  | 29.283 | 1.00 |  |
| 22.44      |     |      | C   |   |    |        |        |        |      |  |
| ATOM       | 418 | C    | THR |   | 32 | 11.448 | -0.754 | 30.564 | 1.00 |  |
| 26.60      |     |      | C   |   |    |        |        |        |      |  |
| ATOM       | 419 | O    | THR |   | 32 | 11.538 | -1.982 | 30.522 | 1.00 |  |
| 57.43      |     |      | O   |   |    |        |        |        |      |  |
| ATOM       | 420 | CB   | THR |   | 32 | 10.238 | -0.335 | 28.422 | 1.00 |  |
| 56.28      |     |      | C   |   |    |        |        |        |      |  |
| ATOM       | 421 | CG2  | THR |   | 32 | 8.946  | -0.130 | 29.213 |      |  |
| 1.00102.70 |     |      |     | C |    |        |        |        |      |  |
| ATOM       | 422 | OG1  | THR |   | 32 | 10.202 | 0.462  | 27.247 |      |  |
| 1.00111.17 |     |      |     | O |    |        |        |        |      |  |
| ATOM       | 423 | HN   | THR |   | 32 | 12.727 | -0.822 | 27.855 | 1.00 |  |
| 18.79      |     |      | H   |   |    |        |        |        |      |  |
| ATOM       | 424 | HA   | THR |   | 32 | 11.334 | 1.118  | 29.542 | 1.00 |  |
| 19.67      |     |      | H   |   |    |        |        |        |      |  |
| ATOM       | 425 | HB   | THR |   | 32 | 10.326 | -1.374 | 28.150 | 1.00 |  |
| 84.25      |     |      | H   |   |    |        |        |        |      |  |
| ATOM       | 426 | HG1  | THR |   | 32 | 10.534 | -0.071 | 26.518 |      |  |
| 1.00205.03 |     |      |     | H |    |        |        |        |      |  |
| ATOM       | 427 | HG21 | THR |   | 32 | 8.933  | 0.866  | 29.630 |      |  |
| 1.00220.71 |     |      |     | H |    |        |        |        |      |  |
| ATOM       | 428 | HG22 | THR |   | 32 | 8.893  | -0.857 | 30.011 |      |  |
| 1.00174.67 |     |      |     | H |    |        |        |        |      |  |
| ATOM       | 429 | HG23 | THR |   | 32 | 8.099  | -0.255 | 28.556 |      |  |
| 1.00217.44 |     |      |     | H |    |        |        |        |      |  |
| ATOM       | 430 | N    | THR |   | 33 | 11.346 | -0.070 | 31.701 | 1.00 |  |
| 22.47      |     |      | N   |   |    |        |        |        |      |  |
| ATOM       | 431 | CA   | THR |   | 33 | 11.335 | -0.741 | 32.997 | 1.00 |  |
| 41.60      |     |      | C   |   |    |        |        |        |      |  |
| ATOM       | 432 | C    | THR |   | 33 | 10.571 | 0.072  | 34.003 | 1.00 |  |
| 38.03      |     |      | C   |   |    |        |        |        |      |  |
| ATOM       | 433 | O    | THR |   | 33 | 11.143 | 0.808  | 34.807 | 1.00 |  |
| 52.73      |     |      | O   |   |    |        |        |        |      |  |
| ATOM       | 434 | CB   | THR |   | 33 | 12.754 | -0.980 | 33.501 | 1.00 |  |
| 63.25      |     |      | C   |   |    |        |        |        |      |  |
| ATOM       | 435 | CG2  | THR |   | 33 | 13.442 | -2.038 | 32.637 |      |  |

|            |     |      |     |   |    |        |        |        |      |
|------------|-----|------|-----|---|----|--------|--------|--------|------|
| 1.00121.65 |     |      |     | C |    |        |        |        |      |
| ATOM       | 436 | OG1  | THR |   | 33 | 13.487 | 0.235  | 33.443 | 1.00 |
| 96.20      |     |      | O   |   |    |        |        |        |      |
| ATOM       | 437 | HN   | THR |   | 33 | 11.272 | 0.906  | 31.665 | 1.00 |
| 23.82      |     |      | H   |   |    |        |        |        |      |
| ATOM       | 438 | HA   | THR |   | 33 | 10.829 | -1.684 | 32.908 | 1.00 |
| 67.12      |     |      | H   |   |    |        |        |        |      |
| ATOM       | 439 | HB   | THR |   | 33 | 12.708 | -1.328 | 34.520 |      |
| 1.00107.59 |     |      |     | H |    |        |        |        |      |
| ATOM       | 440 | HG1  | THR |   | 33 | 13.682 | 0.508  | 34.344 |      |
| 1.00176.27 |     |      |     | H |    |        |        |        |      |
| ATOM       | 441 | HG21 | THR |   | 33 | 12.795 | -2.897 | 32.537 |      |
| 1.00255.23 |     |      |     | H |    |        |        |        |      |
| ATOM       | 442 | HG22 | THR |   | 33 | 14.366 | -2.338 | 33.105 |      |
| 1.00245.37 |     |      |     | H |    |        |        |        |      |
| ATOM       | 443 | HG23 | THR |   | 33 | 13.647 | -1.627 | 31.661 |      |
| 1.00185.78 |     |      |     | H |    |        |        |        |      |
| ATOM       | 444 | N    | GLY |   | 34 | 9.265  | -0.091 | 33.957 | 1.00 |
| 40.93      |     |      | N   |   |    |        |        |        |      |
| ATOM       | 445 | CA   | GLY |   | 34 | 8.397  | 0.604  | 34.876 | 1.00 |
| 45.59      |     |      | C   |   |    |        |        |        |      |
| ATOM       | 446 | C    | GLY |   | 34 | 8.194  | 2.050  | 34.438 | 1.00 |
| 40.97      |     |      | C   |   |    |        |        |        |      |
| ATOM       | 447 | O    | GLY |   | 34 | 7.398  | 2.782  | 35.025 | 1.00 |
| 82.17      |     |      | O   |   |    |        |        |        |      |
| ATOM       | 448 | HN   | GLY |   | 34 | 8.883  | -0.708 | 33.303 | 1.00 |
| 54.00      |     |      | H   |   |    |        |        |        |      |
| ATOM       | 449 | HA1  | GLY |   | 34 | 8.854  | 0.583  | 35.844 | 1.00 |
| 54.41      |     |      | H   |   |    |        |        |        |      |
| ATOM       | 450 | HA2  | GLY |   | 34 | 7.440  | 0.100  | 34.916 | 1.00 |
| 62.09      |     |      | H   |   |    |        |        |        |      |
| ATOM       | 451 | N    | ASN |   | 35 | 8.918  | 2.447  | 33.395 | 1.00 |
| 32.51      |     |      | N   |   |    |        |        |        |      |
| ATOM       | 452 | CA   | ASN |   | 35 | 8.818  | 3.804  | 32.866 | 1.00 |
| 33.20      |     |      | C   |   |    |        |        |        |      |
| ATOM       | 453 | C    | ASN |   | 35 | 9.262  | 3.836  | 31.407 | 1.00 |
| 23.17      |     |      | C   |   |    |        |        |        |      |
| ATOM       | 454 | O    | ASN |   | 35 | 10.116 | 3.051  | 30.992 | 1.00 |
| 27.01      |     |      | O   |   |    |        |        |        |      |
| ATOM       | 455 | CB   | ASN |   | 35 | 9.693  | 4.757  | 33.683 | 1.00 |
| 54.51      |     |      | C   |   |    |        |        |        |      |
| ATOM       | 456 | CG   | ASN |   | 35 | 9.252  | 4.753  | 35.143 | 1.00 |
| 80.73      |     |      | C   |   |    |        |        |        |      |
| ATOM       | 457 | ND2  | ASN |   | 35 | 10.123 | 4.484  | 36.075 |      |
| 1.00220.46 |     |      |     | N |    |        |        |        |      |
| ATOM       | 458 | OD1  | ASN |   | 35 | 8.084  | 5.003  | 35.439 |      |
| 1.00117.80 |     |      |     | O |    |        |        |        |      |
| ATOM       | 459 | HN   | ASN |   | 35 | 9.529  | 1.811  | 32.967 | 1.00 |
| 51.15      |     |      | H   |   |    |        |        |        |      |
| ATOM       | 460 | HA   | ASN |   | 35 | 7.792  | 4.133  | 32.926 | 1.00 |
| 47.21      |     |      | H   |   |    |        |        |        |      |
| ATOM       | 461 | HB1  | ASN |   | 35 | 9.600  | 5.755  | 33.283 | 1.00 |

|            |     |      |     |    |        |       |        |      |  |
|------------|-----|------|-----|----|--------|-------|--------|------|--|
| 68.31      |     |      | H   |    |        |       |        |      |  |
| ATOM       | 462 | HB2  | ASN | 35 | 10.725 | 4.439 | 33.618 | 1.00 |  |
| 57.75      |     |      | H   |    |        |       |        |      |  |
| ATOM       | 463 | HD21 | ASN | 35 | 11.053 | 4.286 | 35.837 |      |  |
| 1.00405.39 |     |      | H   |    |        |       |        |      |  |
| ATOM       | 464 | HD22 | ASN | 35 | 9.848  | 4.480 | 37.017 |      |  |
| 1.00245.64 |     |      | H   |    |        |       |        |      |  |
| ATOM       | 465 | N    | PHE | 36 | 8.674  | 4.742 | 30.627 | 1.00 |  |
| 35.72      |     |      | N   |    |        |       |        |      |  |
| ATOM       | 466 | CA   | PHE | 36 | 9.002  | 4.874 | 29.215 | 1.00 |  |
| 33.41      |     |      | C   |    |        |       |        |      |  |
| ATOM       | 467 | C    | PHE | 36 | 9.885  | 6.095 | 28.978 | 1.00 |  |
| 28.51      |     |      | C   |    |        |       |        |      |  |
| ATOM       | 468 | O    | PHE | 36 | 9.671  | 7.153 | 29.570 | 1.00 |  |
| 45.23      |     |      | O   |    |        |       |        |      |  |
| ATOM       | 469 | CB   | PHE | 36 | 7.706  | 5.019 | 28.432 | 1.00 |  |
| 67.53      |     |      | C   |    |        |       |        |      |  |
| ATOM       | 470 | CG   | PHE | 36 | 6.895  | 3.752 | 28.566 | 1.00 |  |
| 86.71      |     |      | C   |    |        |       |        |      |  |
| ATOM       | 471 | CD1  | PHE | 36 | 5.948  | 3.639 | 29.591 |      |  |
| 1.00106.51 |     |      | C   |    |        |       |        |      |  |
| ATOM       | 472 | CD2  | PHE | 36 | 7.090  | 2.694 | 27.671 | 1.00 |  |
| 99.48      |     |      | C   |    |        |       |        |      |  |
| ATOM       | 473 | CE1  | PHE | 36 | 5.194  | 2.465 | 29.718 |      |  |
| 1.00134.48 |     |      | C   |    |        |       |        |      |  |
| ATOM       | 474 | CE2  | PHE | 36 | 6.336  | 1.522 | 27.800 |      |  |
| 1.00134.27 |     |      | C   |    |        |       |        |      |  |
| ATOM       | 475 | CZ   | PHE | 36 | 5.388  | 1.408 | 28.823 |      |  |
| 1.00149.48 |     |      | C   |    |        |       |        |      |  |
| ATOM       | 476 | HN   | PHE | 36 | 7.997  | 5.334 | 31.006 | 1.00 |  |
| 62.87      |     |      | H   |    |        |       |        |      |  |
| ATOM       | 477 | HA   | PHE | 36 | 9.519  | 3.987 | 28.874 | 1.00 |  |
| 28.53      |     |      | H   |    |        |       |        |      |  |
| ATOM       | 478 | HB1  | PHE | 36 | 7.934  | 5.193 | 27.401 | 1.00 |  |
| 73.56      |     |      | H   |    |        |       |        |      |  |
| ATOM       | 479 | HB2  | PHE | 36 | 7.140  | 5.854 | 28.822 | 1.00 |  |
| 88.42      |     |      | H   |    |        |       |        |      |  |
| ATOM       | 480 | HD1  | PHE | 36 | 5.800  | 4.455 | 30.283 |      |  |
| 1.00110.20 |     |      | H   |    |        |       |        |      |  |
| ATOM       | 481 | HD2  | PHE | 36 | 7.822  | 2.781 | 26.882 | 1.00 |  |
| 93.07      |     |      | H   |    |        |       |        |      |  |
| ATOM       | 482 | HE1  | PHE | 36 | 4.464  | 2.378 | 30.510 |      |  |
| 1.00155.06 |     |      | H   |    |        |       |        |      |  |
| ATOM       | 483 | HE2  | PHE | 36 | 6.486  | 0.704 | 27.108 |      |  |
| 1.00159.46 |     |      | H   |    |        |       |        |      |  |
| ATOM       | 484 | HZ   | PHE | 36 | 4.806  | 0.503 | 28.922 |      |  |
| 1.00183.25 |     |      | H   |    |        |       |        |      |  |
| ATOM       | 485 | N    | THR | 37 | 10.879 | 5.940 | 28.107 | 1.00 |  |
| 20.06      |     |      | N   |    |        |       |        |      |  |
| ATOM       | 486 | CA   | THR | 37 | 11.789 | 7.035 | 27.792 | 1.00 |  |
| 27.18      |     |      | C   |    |        |       |        |      |  |
| ATOM       | 487 | C    | THR | 37 | 12.469 | 6.791 | 26.448 | 1.00 |  |

|            |     |      |     |    |        |       |        |      |  |
|------------|-----|------|-----|----|--------|-------|--------|------|--|
| 41.87      |     |      | C   |    |        |       |        |      |  |
| ATOM       | 488 | O    | THR | 37 | 13.100 | 5.755 | 26.236 |      |  |
| 1.00169.86 |     |      | O   |    |        |       |        |      |  |
| ATOM       | 489 | CB   | THR | 37 | 12.848 | 7.168 | 28.894 | 1.00 |  |
| 26.52      |     |      | C   |    |        |       |        |      |  |
| ATOM       | 490 | CG2  | THR | 37 | 13.251 | 5.778 | 29.397 | 1.00 |  |
| 75.69      |     |      | C   |    |        |       |        |      |  |
| ATOM       | 491 | OG1  | THR | 37 | 13.987 | 7.838 | 28.373 | 1.00 |  |
| 81.95      |     |      | O   |    |        |       |        |      |  |
| ATOM       | 492 | HN   | THR | 37 | 10.999 | 5.077 | 27.663 | 1.00 |  |
| 18.47      |     |      | H   |    |        |       |        |      |  |
| ATOM       | 493 | HA   | THR | 37 | 11.226 | 7.955 | 27.737 | 1.00 |  |
| 38.80      |     |      | H   |    |        |       |        |      |  |
| ATOM       | 494 | HB   | THR | 37 | 12.442 | 7.737 | 29.716 | 1.00 |  |
| 81.60      |     |      | H   |    |        |       |        |      |  |
| ATOM       | 495 | HG1  | THR | 37 | 14.556 | 8.073 | 29.110 |      |  |
| 1.00188.80 |     |      | H   |    |        |       |        |      |  |
| ATOM       | 496 | HG21 | THR | 37 | 14.211 | 5.840 | 29.890 |      |  |
| 1.00196.98 |     |      | H   |    |        |       |        |      |  |
| ATOM       | 497 | HG22 | THR | 37 | 13.319 | 5.094 | 28.565 |      |  |
| 1.00196.23 |     |      | H   |    |        |       |        |      |  |
| ATOM       | 498 | HG23 | THR | 37 | 12.510 | 5.420 | 30.096 |      |  |
| 1.00168.92 |     |      | H   |    |        |       |        |      |  |
| ATOM       | 499 | N    | GLU | 38 | 12.325 | 7.752 | 25.544 | 1.00 |  |
| 26.53      |     |      | N   |    |        |       |        |      |  |
| ATOM       | 500 | CA   | GLU | 38 | 12.916 | 7.647 | 24.212 | 1.00 |  |
| 30.29      |     |      | C   |    |        |       |        |      |  |
| ATOM       | 501 | C    | GLU | 38 | 14.379 | 8.083 | 24.223 | 1.00 |  |
| 25.39      |     |      | C   |    |        |       |        |      |  |
| ATOM       | 502 | O    | GLU | 38 | 14.851 | 8.692 | 25.184 | 1.00 |  |
| 51.60      |     |      | O   |    |        |       |        |      |  |
| ATOM       | 503 | CB   | GLU | 38 | 12.133 | 8.520 | 23.227 | 1.00 |  |
| 54.82      |     |      | C   |    |        |       |        |      |  |
| ATOM       | 504 | CG   | GLU | 38 | 10.689 | 8.011 | 23.112 |      |  |
| 1.00165.84 |     |      | C   |    |        |       |        |      |  |
| ATOM       | 505 | CD   | GLU | 38 | 9.856  | 8.507 | 24.292 |      |  |
| 1.00292.92 |     |      | C   |    |        |       |        |      |  |
| ATOM       | 506 | OE1  | GLU | 38 | 8.690  | 8.155 | 24.356 |      |  |
| 1.00414.19 |     |      | O   |    |        |       |        |      |  |
| ATOM       | 507 | OE2  | GLU | 38 | 10.396 | 9.226 | 25.115 |      |  |
| 1.00537.65 |     |      | O1- |    |        |       |        |      |  |
| ATOM       | 508 | HN   | GLU | 38 | 11.804 | 8.548 | 25.776 | 1.00 |  |
| 84.50      |     |      | H   |    |        |       |        |      |  |
| ATOM       | 509 | HA   | GLU | 38 | 12.861 | 6.619 | 23.884 | 1.00 |  |
| 32.15      |     |      | H   |    |        |       |        |      |  |
| ATOM       | 510 | HB1  | GLU | 38 | 12.604 | 8.473 | 22.256 |      |  |
| 1.00144.82 |     |      | H   |    |        |       |        |      |  |
| ATOM       | 511 | HB2  | GLU | 38 | 12.132 | 9.543 | 23.575 |      |  |
| 1.00106.49 |     |      | H   |    |        |       |        |      |  |
| ATOM       | 512 | HG1  | GLU | 38 | 10.684 | 6.931 | 23.099 |      |  |
| 1.00303.31 |     |      | H   |    |        |       |        |      |  |
| ATOM       | 513 | HG2  | GLU | 38 | 10.256 | 8.380 | 22.193 |      |  |

|            |     |     |     |    |        |        |        |      |  |   |
|------------|-----|-----|-----|----|--------|--------|--------|------|--|---|
| 1.00323.99 |     |     |     |    |        |        |        |      |  | H |
| ATOM       | 514 | N   | CYS | 39 | 15.088 | 7.767  | 23.143 | 1.00 |  |   |
| 15.84      |     |     | N   |    |        |        |        |      |  |   |
| ATOM       | 515 | CA  | CYS | 39 | 16.496 | 8.128  | 23.021 | 1.00 |  |   |
| 14.30      |     |     | C   |    |        |        |        |      |  |   |
| ATOM       | 516 | C   | CYS | 39 | 16.651 | 9.652  | 23.009 | 1.00 |  |   |
| 22.31      |     |     | C   |    |        |        |        |      |  |   |
| ATOM       | 517 | O   | CYS | 39 | 15.746 | 10.361 | 22.566 | 1.00 |  |   |
| 32.92      |     |     | O   |    |        |        |        |      |  |   |
| ATOM       | 518 | CB  | CYS | 39 | 17.058 | 7.539  | 21.721 | 1.00 |  |   |
| 18.08      |     |     | C   |    |        |        |        |      |  |   |
| ATOM       | 519 | SG  | CYS | 39 | 15.994 | 8.012  | 20.334 | 1.00 |  |   |
| 17.41      |     |     | S   |    |        |        |        |      |  |   |
| ATOM       | 520 | HN  | CYS | 39 | 14.652 | 7.287  | 22.411 | 1.00 |  |   |
| 24.87      |     |     | H   |    |        |        |        |      |  |   |
| ATOM       | 521 | HA  | CYS | 39 | 17.036 | 7.711  | 23.856 | 1.00 |  |   |
| 14.60      |     |     | H   |    |        |        |        |      |  |   |
| ATOM       | 522 | HB1 | CYS | 39 | 17.093 | 6.464  | 21.799 | 1.00 |  |   |
| 27.71      |     |     | H   |    |        |        |        |      |  |   |
| ATOM       | 523 | HB2 | CYS | 39 | 18.053 | 7.918  | 21.551 | 1.00 |  |   |
| 34.91      |     |     | H   |    |        |        |        |      |  |   |
| ATOM       | 524 | N   | PRO | 40 | 17.760 | 10.179 | 23.480 | 1.00 |  |   |
| 27.27      |     |     | N   |    |        |        |        |      |  |   |
| ATOM       | 525 | CA  | PRO | 40 | 17.988 | 11.652 | 23.509 | 1.00 |  |   |
| 47.66      |     |     | C   |    |        |        |        |      |  |   |
| ATOM       | 526 | C   | PRO | 40 | 18.305 | 12.205 | 22.122 | 1.00 |  |   |
| 71.54      |     |     | C   |    |        |        |        |      |  |   |
| ATOM       | 527 | O   | PRO | 40 | 18.994 | 11.566 | 21.326 | 1.00 |  |   |
| 87.70      |     |     | O   |    |        |        |        |      |  |   |
| ATOM       | 528 | CB  | PRO | 40 | 19.178 | 11.809 | 24.463 | 1.00 |  |   |
| 53.85      |     |     | C   |    |        |        |        |      |  |   |
| ATOM       | 529 | CG  | PRO | 40 | 19.953 | 10.545 | 24.302 | 1.00 |  |   |
| 46.04      |     |     | C   |    |        |        |        |      |  |   |
| ATOM       | 530 | CD  | PRO | 40 | 18.918 | 9.447  | 24.030 | 1.00 |  |   |
| 25.70      |     |     | C   |    |        |        |        |      |  |   |
| ATOM       | 531 | HA  | PRO | 40 | 17.127 | 12.153 | 23.920 | 1.00 |  |   |
| 58.04      |     |     | H   |    |        |        |        |      |  |   |
| ATOM       | 532 | HB1 | PRO | 40 | 18.833 | 11.906 | 25.483 | 1.00 |  |   |
| 67.93      |     |     | H   |    |        |        |        |      |  |   |
| ATOM       | 533 | HB2 | PRO | 40 | 19.779 | 12.668 | 24.186 | 1.00 |  |   |
| 70.99      |     |     | H   |    |        |        |        |      |  |   |
| ATOM       | 534 | HG1 | PRO | 40 | 20.499 | 10.318 | 25.207 | 1.00 |  |   |
| 65.91      |     |     | H   |    |        |        |        |      |  |   |
| ATOM       | 535 | HG2 | PRO | 40 | 20.638 | 10.633 | 23.467 | 1.00 |  |   |
| 54.99      |     |     | H   |    |        |        |        |      |  |   |
| ATOM       | 536 | HD1 | PRO | 40 | 18.644 | 8.947  | 24.946 | 1.00 |  |   |
| 24.22      |     |     | H   |    |        |        |        |      |  |   |
| ATOM       | 537 | HD2 | PRO | 40 | 19.299 | 8.743  | 23.310 | 1.00 |  |   |
| 26.94      |     |     | H   |    |        |        |        |      |  |   |
| ATOM       | 538 | N   | GLY | 41 | 17.797 | 13.399 | 21.849 |      |  |   |
| 1.00105.24 |     |     |     |    |        |        |        |      |  | N |
| ATOM       | 539 | CA  | GLY | 41 | 18.019 | 14.054 | 20.561 |      |  |   |

|            |     |      |     |    |        |        |        |  |
|------------|-----|------|-----|----|--------|--------|--------|--|
| 1.00147.55 |     |      |     | C  |        |        |        |  |
| ATOM       | 540 | C    | GLY | 41 | 19.252 | 14.950 | 20.611 |  |
| 1.00161.74 |     |      |     | C  |        |        |        |  |
| ATOM       | 541 | O    | GLY | 41 | 19.593 | 15.606 | 19.627 |  |
| 1.00244.37 |     |      |     | O  |        |        |        |  |
| ATOM       | 542 | HN   | GLY | 41 | 17.260 | 13.850 | 22.530 |  |
| 1.00121.79 |     |      |     | H  |        |        |        |  |
| ATOM       | 543 | HA1  | GLY | 41 | 17.159 | 14.657 | 20.317 |  |
| 1.00184.40 |     |      |     | H  |        |        |        |  |
| ATOM       | 544 | HA2  | GLY | 41 | 18.157 | 13.305 | 19.794 |  |
| 1.00157.34 |     |      |     | H  |        |        |        |  |
| ATOM       | 545 | N    | LEU | 42 | 19.913 | 14.978 | 21.768 |  |
| 1.00162.48 |     |      |     | N  |        |        |        |  |
| ATOM       | 546 | CA   | LEU | 42 | 21.111 | 15.803 | 21.948 |  |
| 1.00191.48 |     |      |     | C  |        |        |        |  |
| ATOM       | 547 | C    | LEU | 42 | 22.359 | 14.930 | 21.993 |  |
| 1.00166.66 |     |      |     | C  |        |        |        |  |
| ATOM       | 548 | O    | LEU | 42 | 22.352 | 13.845 | 22.575 |  |
| 1.00251.38 |     |      |     | O  |        |        |        |  |
| ATOM       | 549 | CB   | LEU | 42 | 20.999 | 16.595 | 23.254 |  |
| 1.00307.99 |     |      |     | C  |        |        |        |  |
| ATOM       | 550 | CG   | LEU | 42 | 19.660 | 17.341 | 23.295 |  |
| 1.00452.28 |     |      |     | C  |        |        |        |  |
| ATOM       | 551 | CD1  | LEU | 42 | 19.575 | 18.150 | 24.590 |  |
| 1.00681.24 |     |      |     | C  |        |        |        |  |
| ATOM       | 552 | CD2  | LEU | 42 | 19.547 | 18.282 | 22.085 |  |
| 1.00527.46 |     |      |     | C  |        |        |        |  |
| ATOM       | 553 | HN   | LEU | 42 | 19.590 | 14.436 | 22.518 |  |
| 1.00195.47 |     |      |     | H  |        |        |        |  |
| ATOM       | 554 | HA   | LEU | 42 | 21.202 | 16.499 | 21.126 |  |
| 1.00229.77 |     |      |     | H  |        |        |        |  |
| ATOM       | 555 | HB1  | LEU | 42 | 21.807 | 17.307 | 23.310 |  |
| 1.00342.49 |     |      |     | H  |        |        |        |  |
| ATOM       | 556 | HB2  | LEU | 42 | 21.058 | 15.915 | 24.091 |  |
| 1.00335.33 |     |      |     | H  |        |        |        |  |
| ATOM       | 557 | HG   | LEU | 42 | 18.853 | 16.623 | 23.270 |  |
| 1.00427.79 |     |      |     | H  |        |        |        |  |
| ATOM       | 558 | HD11 | LEU | 42 | 19.591 | 17.479 | 25.438 |  |
| 1.00909.71 |     |      |     | H  |        |        |        |  |
| ATOM       | 559 | HD12 | LEU | 42 | 18.655 | 18.718 | 24.601 |  |
| 1.00706.80 |     |      |     | H  |        |        |        |  |
| ATOM       | 560 | HD13 | LEU | 42 | 20.414 | 18.826 | 24.650 |  |
| 1.00858.82 |     |      |     | H  |        |        |        |  |
| ATOM       | 561 | HD21 | LEU | 42 | 19.228 | 17.717 | 21.221 |  |
| 1.00631.69 |     |      |     | H  |        |        |        |  |
| ATOM       | 562 | HD22 | LEU | 42 | 20.506 | 18.738 | 21.885 |  |
| 1.00628.06 |     |      |     | H  |        |        |        |  |
| ATOM       | 563 | HD23 | LEU | 42 | 18.820 | 19.054 | 22.293 |  |
| 1.00656.75 |     |      |     | H  |        |        |        |  |
| ATOM       | 564 | N    | THR | 43 | 23.435 | 15.413 | 21.371 |  |
| 1.00178.52 |     |      |     | N  |        |        |        |  |
| ATOM       | 565 | CA   | THR | 43 | 24.701 | 14.678 | 21.335 |  |

|            |     |      |     |    |        |        |        |  |
|------------|-----|------|-----|----|--------|--------|--------|--|
| 1.00240.84 |     |      |     | C  |        |        |        |  |
| ATOM       | 566 | C    | THR | 43 | 25.869 | 15.613 | 21.646 |  |
| 1.00372.31 |     |      |     | C  |        |        |        |  |
| ATOM       | 567 | O    | THR | 43 | 26.723 | 15.854 | 20.794 |  |
| 1.00500.13 |     |      |     | O  |        |        |        |  |
| ATOM       | 568 | CB   | THR | 43 | 24.904 | 14.064 | 19.950 |  |
| 1.00354.13 |     |      |     | C  |        |        |        |  |
| ATOM       | 569 | CG2  | THR | 43 | 23.790 | 13.055 | 19.669 |  |
| 1.00463.04 |     |      |     | C  |        |        |        |  |
| ATOM       | 570 | OG1  | THR | 43 | 24.876 | 15.091 | 18.969 |  |
| 1.00508.50 |     |      |     | O  |        |        |        |  |
| ATOM       | 571 | HN   | THR | 43 | 23.376 | 16.284 | 20.925 |  |
| 1.00229.59 |     |      |     | H  |        |        |        |  |
| ATOM       | 572 | HA   | THR | 43 | 24.682 | 13.881 | 22.065 |  |
| 1.00249.90 |     |      |     | H  |        |        |        |  |
| ATOM       | 573 | HB   | THR | 43 | 25.856 | 13.559 | 19.921 |  |
| 1.00481.58 |     |      |     | H  |        |        |        |  |
| ATOM       | 574 | HG1  | THR | 43 | 25.140 | 14.707 | 18.130 |  |
| 1.00624.31 |     |      |     | H  |        |        |        |  |
| ATOM       | 575 | HG21 | THR | 43 | 23.770 | 12.312 | 20.453 |  |
| 1.00650.95 |     |      |     | H  |        |        |        |  |
| ATOM       | 576 | HG22 | THR | 43 | 23.972 | 12.572 | 18.720 |  |
| 1.00580.73 |     |      |     | H  |        |        |        |  |
| ATOM       | 577 | HG23 | THR | 43 | 22.839 | 13.568 | 19.635 |  |
| 1.00571.99 |     |      |     | H  |        |        |        |  |
| ATOM       | 578 | N    | PRO | 44 | 25.917 | 16.140 | 22.842 |  |
| 1.00488.39 |     |      |     | N  |        |        |        |  |
| ATOM       | 579 | CA   | PRO | 44 | 27.002 | 17.071 | 23.267 |  |
| 1.00760.13 |     |      |     | C  |        |        |        |  |
| ATOM       | 580 | C    | PRO | 44 | 28.315 | 16.333 | 23.519 |  |
| 1.00735.36 |     |      |     | C  |        |        |        |  |
| ATOM       | 581 | O    | PRO | 44 | 29.382 | 16.945 | 23.585 |  |
| 1.00999.99 |     |      |     | O  |        |        |        |  |
| ATOM       | 582 | CB   | PRO | 44 | 26.448 | 17.697 | 24.554 |  |
| 1.00999.99 |     |      |     | C  |        |        |        |  |
| ATOM       | 583 | CG   | PRO | 44 | 25.545 | 16.650 | 25.124 |  |
| 1.00856.94 |     |      |     | C  |        |        |        |  |
| ATOM       | 584 | CD   | PRO | 44 | 24.945 | 15.904 | 23.926 |  |
| 1.00548.09 |     |      |     | C  |        |        |        |  |
| ATOM       | 585 | HA   | PRO | 44 | 27.145 | 17.840 | 22.523 |  |
| 1.00939.00 |     |      |     | H  |        |        |        |  |
| ATOM       | 586 | HB1  | PRO | 44 | 25.881 | 18.588 | 24.324 |  |
| 1.00999.99 |     |      |     | H  |        |        |        |  |
| ATOM       | 587 | HB2  | PRO | 44 | 27.250 | 17.928 | 25.243 |  |
| 1.00999.99 |     |      |     | H  |        |        |        |  |
| ATOM       | 588 | HG1  | PRO | 44 | 24.757 | 17.107 | 25.703 |  |
| 1.00999.99 |     |      |     | H  |        |        |        |  |
| ATOM       | 589 | HG2  | PRO | 44 | 26.115 | 15.969 | 25.746 |  |
| 1.00853.53 |     |      |     | H  |        |        |        |  |
| ATOM       | 590 | HD1  | PRO | 44 | 23.983 | 16.314 | 23.658 |  |
| 1.00602.45 |     |      |     | H  |        |        |        |  |
| ATOM       | 591 | HD2  | PRO | 44 | 24.864 | 14.847 | 24.142 |  |

|            |     |      |     |    |        |        |        |  |
|------------|-----|------|-----|----|--------|--------|--------|--|
| 1.00463.32 |     |      |     | H  |        |        |        |  |
| ATOM       | 592 | N    | ILE | 45 | 28.226 | 15.014 | 23.659 |  |
| 1.00518.33 |     |      |     | N  |        |        |        |  |
| ATOM       | 593 | CA   | ILE | 45 | 29.409 | 14.201 | 23.905 |  |
| 1.00582.79 |     |      |     | C  |        |        |        |  |
| ATOM       | 594 | C    | ILE | 45 | 30.476 | 14.472 | 22.849 |  |
| 1.00795.93 |     |      |     | C  |        |        |        |  |
| ATOM       | 595 | O    | ILE | 45 | 30.170 | 14.609 | 21.665 |  |
| 1.00898.75 |     |      |     | O  |        |        |        |  |
| ATOM       | 596 | CB   | ILE | 45 | 29.035 | 12.717 | 23.886 |  |
| 1.00474.41 |     |      |     | C  |        |        |        |  |
| ATOM       | 597 | CG1  | ILE | 45 | 30.249 | 11.880 | 24.300 |  |
| 1.00516.90 |     |      |     | C  |        |        |        |  |
| ATOM       | 598 | CG2  | ILE | 45 | 28.602 | 12.318 | 22.474 |  |
| 1.00760.75 |     |      |     | C  |        |        |        |  |
| ATOM       | 599 | CD1  | ILE | 45 | 29.806 | 10.441 | 24.573 |  |
| 1.00566.81 |     |      |     | C  |        |        |        |  |
| ATOM       | 600 | HN   | ILE | 45 | 27.348 | 14.583 | 23.598 |  |
| 1.00395.72 |     |      |     | H  |        |        |        |  |
| ATOM       | 601 | HA   | ILE | 45 | 29.806 | 14.447 | 24.878 |  |
| 1.00711.06 |     |      |     | H  |        |        |        |  |
| ATOM       | 602 | HB   | ILE | 45 | 28.222 | 12.542 | 24.575 |  |
| 1.00477.81 |     |      |     | H  |        |        |        |  |
| ATOM       | 603 | HG11 | ILE | 45 | 30.684 | 12.296 | 25.195 |  |
| 1.00624.28 |     |      |     | H  |        |        |        |  |
| ATOM       | 604 | HG12 | ILE | 45 | 30.980 | 11.888 | 23.504 |  |
| 1.00744.84 |     |      |     | H  |        |        |        |  |
| ATOM       | 605 | HG21 | ILE | 45 | 29.468 | 12.279 | 21.829 |  |
| 1.00920.57 |     |      |     | H  |        |        |        |  |
| ATOM       | 606 | HG22 | ILE | 45 | 27.902 | 13.049 | 22.093 |  |
| 1.00999.99 |     |      |     | H  |        |        |        |  |
| ATOM       | 607 | HG23 | ILE | 45 | 28.130 | 11.348 | 22.502 |  |
| 1.00865.46 |     |      |     | H  |        |        |        |  |
| ATOM       | 608 | HD11 | ILE | 45 | 30.677 | 9.819  | 24.719 |  |
| 1.00658.89 |     |      |     | H  |        |        |        |  |
| ATOM       | 609 | HD12 | ILE | 45 | 29.237 | 10.073 | 23.732 |  |
| 1.00734.30 |     |      |     | H  |        |        |        |  |
| ATOM       | 610 | HD13 | ILE | 45 | 29.192 | 10.416 | 25.461 |  |
| 1.00675.84 |     |      |     | H  |        |        |        |  |
| ATOM       | 611 | N    | ALA | 46 | 31.728 | 14.547 | 23.284 |  |
| 1.00999.99 |     |      |     | N  |        |        |        |  |
| ATOM       | 612 | CA   | ALA | 46 | 32.832 | 14.803 | 22.367 |  |
| 1.00999.99 |     |      |     | C  |        |        |        |  |
| ATOM       | 613 | C    | ALA | 46 | 33.081 | 13.591 | 21.477 |  |
| 1.00999.99 |     |      |     | C  |        |        |        |  |
| ATOM       | 614 | CB   | ALA | 46 | 34.103 | 15.130 | 23.155 |  |
| 1.00999.99 |     |      |     | C  |        |        |        |  |
| ATOM       | 615 | OT1  | ALA | 46 | 32.214 | 13.280 | 20.675 |  |
| 1.00999.99 |     |      |     | O  |        |        |        |  |
| ATOM       | 616 | OT2  | ALA | 46 | 34.134 | 12.989 | 21.608 |  |
| 1.00999.99 |     |      |     | O  |        |        |        |  |
| ATOM       | 617 | HN   | ALA | 46 | 31.914 | 14.428 | 24.240 |  |



|            |     |     |     |   |    |        |        |        |
|------------|-----|-----|-----|---|----|--------|--------|--------|
| 1.00999.99 |     |     |     | H |    |        |        |        |
| ATOM       | 618 | HA  | ALA |   | 46 | 32.582 | 15.649 | 21.745 |
| 1.00999.99 |     |     |     | H |    |        |        |        |
| ATOM       | 619 | HB1 | ALA |   | 46 | 34.487 | 14.227 | 23.607 |
| 1.00999.99 |     |     |     | H |    |        |        |        |
| ATOM       | 620 | HB2 | ALA |   | 46 | 33.874 | 15.850 | 23.927 |
| 1.00999.99 |     |     |     | H |    |        |        |        |
| ATOM       | 621 | HB3 | ALA |   | 46 | 34.845 | 15.541 | 22.486 |
| 1.00999.99 |     |     |     | H |    |        |        |        |
| ENDMDL     |     |     |     |   |    |        |        |        |
| TER        |     |     |     |   |    |        |        |        |
| MODEL      | 15  |     |     |   |    |        |        |        |
| ATOM       | 1   | N   | GLY |   | 1  | 27.181 | 0.115  | 14.390 |
| 1.00999.99 |     |     |     | N |    |        |        |        |
| ATOM       | 2   | CA  | GLY |   | 1  | 26.672 | 0.645  | 13.092 |
| 1.00999.99 |     |     |     | C |    |        |        |        |
| ATOM       | 3   | C   | GLY |   | 1  | 25.287 | 1.249  | 13.297 |
| 1.00999.99 |     |     |     | C |    |        |        |        |
| ATOM       | 4   | O   | GLY |   | 1  | 24.967 | 1.741  | 14.378 |
| 1.00999.99 |     |     |     | O |    |        |        |        |
| ATOM       | 5   | HA1 | GLY |   | 1  | 26.608 | -0.159 | 12.374 |
| 1.00999.99 |     |     |     | H |    |        |        |        |
| ATOM       | 6   | HA2 | GLY |   | 1  | 27.347 | 1.404  | 12.725 |
| 1.00999.99 |     |     |     | H |    |        |        |        |
| ATOM       | 7   | HT1 | GLY |   | 1  | 28.175 | -0.168 | 14.282 |
| 1.00999.99 |     |     |     | H |    |        |        |        |
| ATOM       | 8   | HT2 | GLY |   | 1  | 26.614 | -0.711 | 14.673 |
| 1.00999.99 |     |     |     | H |    |        |        |        |
| ATOM       | 9   | HT3 | GLY |   | 1  | 27.109 | 0.852  | 15.118 |
| 1.00999.99 |     |     |     | H |    |        |        |        |
| ATOM       | 10  | N   | LEU |   | 2  | 24.470 | 1.206  | 12.250 |
| 1.00999.99 |     |     |     | N |    |        |        |        |
| ATOM       | 11  | CA  | LEU |   | 2  | 23.117 | 1.753  | 12.321 |
| 1.00895.59 |     |     |     | C |    |        |        |        |
| ATOM       | 12  | C   | LEU |   | 2  | 22.173 | 0.753  | 12.982 |
| 1.00532.27 |     |     |     | C |    |        |        |        |
| ATOM       | 13  | O   | LEU |   | 2  | 22.386 | -0.458 | 12.907 |
| 1.00625.21 |     |     |     | O |    |        |        |        |
| ATOM       | 14  | CB  | LEU |   | 2  | 22.610 | 2.076  | 10.912 |
| 1.00999.99 |     |     |     | C |    |        |        |        |
| ATOM       | 15  | CG  | LEU |   | 2  | 23.579 | 3.036  | 10.211 |
| 1.00999.99 |     |     |     | C |    |        |        |        |
| ATOM       | 16  | CD1 | LEU |   | 2  | 23.080 | 3.301  | 8.789  |
| 1.00999.99 |     |     |     | C |    |        |        |        |
| ATOM       | 17  | CD2 | LEU |   | 2  | 23.664 | 4.364  | 10.986 |
| 1.00999.99 |     |     |     | C |    |        |        |        |
| ATOM       | 18  | HN  | LEU |   | 2  | 24.780 | 0.802  | 11.412 |
| 1.00999.99 |     |     |     | H |    |        |        |        |
| ATOM       | 19  | HA  | LEU |   | 2  | 23.130 | 2.659  | 12.906 |
| 1.00890.87 |     |     |     | H |    |        |        |        |
| ATOM       | 20  | HB1 | LEU |   | 2  | 21.636 | 2.539  | 10.980 |
| 1.00924.07 |     |     |     | H |    |        |        |        |

|            |    |      |     |   |        |        |        |      |  |
|------------|----|------|-----|---|--------|--------|--------|------|--|
| ATOM       | 21 | HB2  | LEU | 2 | 22.533 | 1.163  | 10.341 |      |  |
| 1.00999.99 |    |      |     |   |        |        |        | H    |  |
| ATOM       | 22 | HG   | LEU | 2 | 24.559 | 2.582  | 10.165 |      |  |
| 1.00999.99 |    |      |     |   |        |        |        | H    |  |
| ATOM       | 23 | HD11 | LEU | 2 | 23.692 | 4.064  | 8.328  |      |  |
| 1.00999.99 |    |      |     |   |        |        |        | H    |  |
| ATOM       | 24 | HD12 | LEU | 2 | 22.054 | 3.637  | 8.823  |      |  |
| 1.00999.99 |    |      |     |   |        |        |        | H    |  |
| ATOM       | 25 | HD13 | LEU | 2 | 23.142 | 2.393  | 8.209  |      |  |
| 1.00999.99 |    |      |     |   |        |        |        | H    |  |
| ATOM       | 26 | HD21 | LEU | 2 | 22.691 | 4.615  | 11.388 |      |  |
| 1.00999.99 |    |      |     |   |        |        |        | H    |  |
| ATOM       | 27 | HD22 | LEU | 2 | 23.991 | 5.152  | 10.324 |      |  |
| 1.00999.99 |    |      |     |   |        |        |        | H    |  |
| ATOM       | 28 | HD23 | LEU | 2 | 24.373 | 4.264  | 11.793 |      |  |
| 1.00999.99 |    |      |     |   |        |        |        | H    |  |
| ATOM       | 29 | N    | CYS | 3 | 21.128 | 1.265  | 13.626 |      |  |
| 1.00271.28 |    |      |     |   |        |        |        | N    |  |
| ATOM       | 30 | CA   | CYS | 3 | 20.160 | 0.402  | 14.293 |      |  |
| 1.00104.50 |    |      |     |   |        |        |        | C    |  |
| ATOM       | 31 | C    | CYS | 3 | 19.420 | -0.454 | 13.269 | 1.00 |  |
| 90.98      |    |      | C   |   |        |        |        |      |  |
| ATOM       | 32 | O    | CYS | 3 | 19.179 | -0.021 | 12.142 |      |  |
| 1.00207.28 |    |      |     |   |        |        |        | O    |  |
| ATOM       | 33 | CB   | CYS | 3 | 19.151 | 1.247  | 15.076 | 1.00 |  |
| 37.83      |    |      | C   |   |        |        |        |      |  |
| ATOM       | 34 | SG   | CYS | 3 | 19.991 | 2.089  | 16.441 | 1.00 |  |
| 81.56      |    |      | S   |   |        |        |        |      |  |
| ATOM       | 35 | HN   | CYS | 3 | 21.007 | 2.237  | 13.651 |      |  |
| 1.00296.55 |    |      |     |   |        |        |        | H    |  |
| ATOM       | 36 | HA   | CYS | 3 | 20.682 | -0.247 | 14.980 |      |  |
| 1.00166.45 |    |      |     |   |        |        |        | H    |  |
| ATOM       | 37 | HB1  | CYS | 3 | 18.376 | 0.608  | 15.471 | 1.00 |  |
| 40.38      |    |      | H   |   |        |        |        |      |  |
| ATOM       | 38 | HB2  | CYS | 3 | 18.711 | 1.982  | 14.419 | 1.00 |  |
| 98.45      |    |      | H   |   |        |        |        |      |  |
| ATOM       | 39 | N    | SER | 4 | 19.061 | -1.670 | 13.668 | 1.00 |  |
| 85.31      |    |      | N   |   |        |        |        |      |  |
| ATOM       | 40 | CA   | SER | 4 | 18.348 | -2.578 | 12.775 | 1.00 |  |
| 92.94      |    |      | C   |   |        |        |        |      |  |
| ATOM       | 41 | C    | SER | 4 | 17.026 | -1.963 | 12.351 | 1.00 |  |
| 67.37      |    |      | C   |   |        |        |        |      |  |
| ATOM       | 42 | O    | SER | 4 | 16.626 | -2.044 | 11.190 |      |  |
| 1.00102.28 |    |      |     |   |        |        |        | O    |  |
| ATOM       | 43 | CB   | SER | 4 | 18.051 | -3.890 | 13.492 |      |  |
| 1.00123.83 |    |      |     |   |        |        |        | C    |  |
| ATOM       | 44 | OG   | SER | 4 | 17.480 | -4.810 | 12.569 |      |  |
| 1.00178.89 |    |      |     |   |        |        |        | O    |  |
| ATOM       | 45 | HN   | SER | 4 | 19.279 | -1.961 | 14.578 |      |  |
| 1.00163.03 |    |      |     |   |        |        |        | H    |  |
| ATOM       | 46 | HA   | SER | 4 | 18.951 | -2.775 | 11.903 |      |  |
| 1.00129.78 |    |      |     |   |        |        |        | H    |  |

|            |    |     |     |   |        |        |        |      |
|------------|----|-----|-----|---|--------|--------|--------|------|
| ATOM       | 47 | HB1 | SER | 4 | 17.348 | -3.699 | 14.299 |      |
| 1.00105.26 |    |     |     |   |        |        |        | H    |
| ATOM       | 48 | HB2 | SER | 4 | 18.960 | -4.304 | 13.896 |      |
| 1.00156.87 |    |     |     |   |        |        |        | H    |
| ATOM       | 49 | HG  | SER | 4 | 18.160 | -5.056 | 11.937 |      |
| 1.00218.16 |    |     |     |   |        |        |        | H    |
| ATOM       | 50 | N   | GLU | 5 | 16.343 | -1.368 | 13.323 | 1.00 |
| 41.67      |    |     | N   |   |        |        |        |      |
| ATOM       | 51 | CA  | GLU | 5 | 15.044 | -0.754 | 13.086 | 1.00 |
| 41.21      |    |     | C   |   |        |        |        |      |
| ATOM       | 52 | C   | GLU | 5 | 14.898 | 0.519  | 13.912 | 1.00 |
| 41.92      |    |     | C   |   |        |        |        |      |
| ATOM       | 53 | O   | GLU | 5 | 15.859 | 0.990  | 14.519 | 1.00 |
| 74.72      |    |     | O   |   |        |        |        |      |
| ATOM       | 54 | CB  | GLU | 5 | 13.948 | -1.746 | 13.465 | 1.00 |
| 49.24      |    |     | C   |   |        |        |        |      |
| ATOM       | 55 | CG  | GLU | 5 | 14.105 | -2.115 | 14.933 | 1.00 |
| 55.48      |    |     | C   |   |        |        |        |      |
| ATOM       | 56 | CD  | GLU | 5 | 13.194 | -3.288 | 15.279 | 1.00 |
| 92.06      |    |     | C   |   |        |        |        |      |
| ATOM       | 57 | OE1 | GLU | 5 | 13.207 | -3.706 | 16.426 |      |
| 1.00206.49 |    |     |     |   |        |        |        | O    |
| ATOM       | 58 | OE2 | GLU | 5 | 12.498 | -3.755 | 14.392 |      |
| 1.00197.24 |    |     |     |   |        |        |        | O1-  |
| ATOM       | 59 | HN  | GLU | 5 | 16.716 | -1.358 | 14.229 | 1.00 |
| 45.52      |    |     | H   |   |        |        |        |      |
| ATOM       | 60 | HA  | GLU | 5 | 14.946 | -0.511 | 12.046 | 1.00 |
| 60.63      |    |     | H   |   |        |        |        |      |
| ATOM       | 61 | HB1 | GLU | 5 | 14.039 | -2.634 | 12.859 | 1.00 |
| 61.59      |    |     | H   |   |        |        |        |      |
| ATOM       | 62 | HB2 | GLU | 5 | 12.987 | -1.296 | 13.307 | 1.00 |
| 63.66      |    |     | H   |   |        |        |        |      |
| ATOM       | 63 | HG1 | GLU | 5 | 13.842 | -1.267 | 15.547 | 1.00 |
| 58.03      |    |     | H   |   |        |        |        |      |
| ATOM       | 64 | HG2 | GLU | 5 | 15.131 | -2.387 | 15.115 | 1.00 |
| 57.77      |    |     | H   |   |        |        |        |      |
| ATOM       | 65 | N   | ASN | 6 | 13.690 | 1.074  | 13.932 | 1.00 |
| 50.73      |    |     | N   |   |        |        |        |      |
| ATOM       | 66 | CA  | ASN | 6 | 13.439 | 2.294  | 14.690 | 1.00 |
| 71.04      |    |     | C   |   |        |        |        |      |
| ATOM       | 67 | C   | ASN | 6 | 13.738 | 2.065  | 16.167 | 1.00 |
| 65.17      |    |     | C   |   |        |        |        |      |
| ATOM       | 68 | O   | ASN | 6 | 14.292 | 2.934  | 16.841 | 1.00 |
| 94.86      |    |     | O   |   |        |        |        |      |
| ATOM       | 69 | CB  | ASN | 6 | 11.982 | 2.726  | 14.520 | 1.00 |
| 94.83      |    |     | C   |   |        |        |        |      |
| ATOM       | 70 | CG  | ASN | 6 | 11.754 | 3.253  | 13.108 |      |
| 1.00160.94 |    |     |     |   |        |        |        | C    |
| ATOM       | 71 | ND2 | ASN | 6 | 10.542 | 3.300  | 12.625 |      |
| 1.00244.88 |    |     |     |   |        |        |        | N    |
| ATOM       | 72 | OD1 | ASN | 6 | 12.706 | 3.634  | 12.427 |      |
| 1.00219.73 |    |     |     |   |        |        |        | O    |

|            |    |      |     |   |        |        |        |      |
|------------|----|------|-----|---|--------|--------|--------|------|
| ATOM       | 73 | HN   | ASN | 6 | 12.959 | 0.657  | 13.430 | 1.00 |
| 72.81      |    |      | H   |   |        |        |        |      |
| ATOM       | 74 | HA   | ASN | 6 | 14.082 | 3.077  | 14.317 | 1.00 |
| 96.02      |    |      | H   |   |        |        |        |      |
| ATOM       | 75 | HB1  | ASN | 6 | 11.752 | 3.504  | 15.233 |      |
| 1.00111.09 |    |      | H   |   |        |        |        |      |
| ATOM       | 76 | HB2  | ASN | 6 | 11.335 | 1.878  | 14.695 | 1.00 |
| 98.13      |    |      | H   |   |        |        |        |      |
| ATOM       | 77 | HD21 | ASN | 6 | 9.786  | 2.997  | 13.170 |      |
| 1.00272.43 |    |      | H   |   |        |        |        |      |
| ATOM       | 78 | HD22 | ASN | 6 | 10.390 | 3.638  | 11.718 |      |
| 1.00336.78 |    |      | H   |   |        |        |        |      |
| ATOM       | 79 | N    | GLY | 7 | 13.372 | 0.884  | 16.663 | 1.00 |
| 51.80      |    |      | N   |   |        |        |        |      |
| ATOM       | 80 | CA   | GLY | 7 | 13.606 | 0.528  | 18.064 | 1.00 |
| 71.47      |    |      | C   |   |        |        |        |      |
| ATOM       | 81 | C    | GLY | 7 | 14.250 | -0.849 | 18.164 | 1.00 |
| 41.04      |    |      | C   |   |        |        |        |      |
| ATOM       | 82 | O    | GLY | 7 | 13.572 | -1.849 | 18.403 | 1.00 |
| 44.54      |    |      | O   |   |        |        |        |      |
| ATOM       | 83 | HN   | GLY | 7 | 12.939 | 0.233  | 16.071 | 1.00 |
| 45.49      |    |      | H   |   |        |        |        |      |
| ATOM       | 84 | HA1  | GLY | 7 | 12.665 | 0.513  | 18.588 |      |
| 1.00103.52 |    |      | H   |   |        |        |        |      |
| ATOM       | 85 | HA2  | GLY | 7 | 14.258 | 1.259  | 18.525 |      |
| 1.00108.67 |    |      | H   |   |        |        |        |      |
| ATOM       | 86 | N    | ASP | 8 | 15.564 | -0.894 | 17.979 | 1.00 |
| 27.00      |    |      | N   |   |        |        |        |      |
| ATOM       | 87 | CA   | ASP | 8 | 16.295 | -2.153 | 18.049 | 1.00 |
| 14.15      |    |      | C   |   |        |        |        |      |
| ATOM       | 88 | C    | ASP | 8 | 16.156 | -2.777 | 19.431 | 1.00 |
| 9.37       |    |      | C   |   |        |        |        |      |
| ATOM       | 89 | O    | ASP | 8 | 15.945 | -3.983 | 19.562 | 1.00 |
| 14.61      |    |      | O   |   |        |        |        |      |
| ATOM       | 90 | CB   | ASP | 8 | 17.775 | -1.919 | 17.735 | 1.00 |
| 15.06      |    |      | C   |   |        |        |        |      |
| ATOM       | 91 | CG   | ASP | 8 | 18.519 | -3.249 | 17.707 | 1.00 |
| 21.22      |    |      | C   |   |        |        |        |      |
| ATOM       | 92 | OD1  | ASP | 8 | 19.674 | -3.251 | 17.312 |      |
| 1.00119.56 |    |      | O   |   |        |        |        |      |
| ATOM       | 93 | OD2  | ASP | 8 | 17.925 | -4.247 | 18.079 |      |
| 1.00133.27 |    |      | O1- |   |        |        |        |      |
| ATOM       | 94 | HN   | ASP | 8 | 16.049 | -0.064 | 17.792 | 1.00 |
| 35.63      |    |      | H   |   |        |        |        |      |
| ATOM       | 95 | HA   | ASP | 8 | 15.889 | -2.833 | 17.317 | 1.00 |
| 20.92      |    |      | H   |   |        |        |        |      |
| ATOM       | 96 | HB1  | ASP | 8 | 18.204 | -1.285 | 18.497 | 1.00 |
| 29.39      |    |      | H   |   |        |        |        |      |
| ATOM       | 97 | HB2  | ASP | 8 | 17.866 | -1.435 | 16.774 | 1.00 |
| 44.14      |    |      | H   |   |        |        |        |      |
| ATOM       | 98 | N    | CYS | 9 | 16.277 | -1.946 | 20.456 | 1.00 |
| 5.93       |    |      | N   |   |        |        |        |      |

|            |     |     |     |    |        |        |        |      |
|------------|-----|-----|-----|----|--------|--------|--------|------|
| ATOM       | 99  | CA  | CYS | 9  | 16.161 | -2.421 | 21.829 | 1.00 |
| 7.54       |     |     | C   |    |        |        |        |      |
| ATOM       | 100 | C   | CYS | 9  | 14.770 | -2.992 | 22.076 | 1.00 |
| 14.60      |     |     | C   |    |        |        |        |      |
| ATOM       | 101 | O   | CYS | 9  | 14.613 | -4.031 | 22.716 | 1.00 |
| 25.78      |     |     | O   |    |        |        |        |      |
| ATOM       | 102 | CB  | CYS | 9  | 16.437 | -1.273 | 22.791 | 1.00 |
| 6.63       |     |     | C   |    |        |        |        |      |
| ATOM       | 103 | SG  | CYS | 9  | 18.189 | -0.873 | 22.699 | 1.00 |
| 10.91      |     |     | S   |    |        |        |        |      |
| ATOM       | 104 | HN  | CYS | 9  | 16.444 | -0.997 | 20.285 | 1.00 |
| 6.51       |     |     | H   |    |        |        |        |      |
| ATOM       | 105 | HA  | CYS | 9  | 16.900 | -3.186 | 21.994 | 1.00 |
| 11.12      |     |     | H   |    |        |        |        |      |
| ATOM       | 106 | HB1 | CYS | 9  | 16.191 | -1.566 | 23.798 | 1.00 |
| 11.28      |     |     | H   |    |        |        |        |      |
| ATOM       | 107 | HB2 | CYS | 9  | 15.850 | -0.410 | 22.508 | 1.00 |
| 5.04       |     |     | H   |    |        |        |        |      |
| ATOM       | 108 | N   | ALA | 10 | 13.767 | -2.303 | 21.547 | 1.00 |
| 16.26      |     |     | N   |    |        |        |        |      |
| ATOM       | 109 | CA  | ALA | 10 | 12.380 | -2.733 | 21.688 | 1.00 |
| 32.04      |     |     | C   |    |        |        |        |      |
| ATOM       | 110 | C   | ALA | 10 | 11.477 | -1.869 | 20.810 | 1.00 |
| 45.47      |     |     | C   |    |        |        |        |      |
| ATOM       | 111 | O   | ALA | 10 | 11.869 | -0.780 | 20.391 |      |
| 1.00119.04 |     |     | O   |    |        |        |        |      |
| ATOM       | 112 | CB  | ALA | 10 | 11.940 | -2.636 | 23.152 | 1.00 |
| 30.10      |     |     | C   |    |        |        |        |      |
| ATOM       | 113 | HN  | ALA | 10 | 13.965 | -1.488 | 21.041 | 1.00 |
| 12.81      |     |     | H   |    |        |        |        |      |
| ATOM       | 114 | HA  | ALA | 10 | 12.300 | -3.762 | 21.365 | 1.00 |
| 47.14      |     |     | H   |    |        |        |        |      |
| ATOM       | 115 | HB1 | ALA | 10 | 12.759 | -2.925 | 23.794 | 1.00 |
| 84.37      |     |     | H   |    |        |        |        |      |
| ATOM       | 116 | HB2 | ALA | 10 | 11.101 | -3.297 | 23.322 |      |
| 1.00118.20 |     |     | H   |    |        |        |        |      |
| ATOM       | 117 | HB3 | ALA | 10 | 11.648 | -1.622 | 23.378 |      |
| 1.00117.32 |     |     | H   |    |        |        |        |      |
| ATOM       | 118 | N   | ALA | 11 | 10.272 | -2.355 | 20.528 | 1.00 |
| 30.62      |     |     | N   |    |        |        |        |      |
| ATOM       | 119 | CA  | ALA | 11 | 9.343  | -1.603 | 19.693 | 1.00 |
| 35.24      |     |     | C   |    |        |        |        |      |
| ATOM       | 120 | C   | ALA | 11 | 9.013  | -0.255 | 20.331 | 1.00 |
| 22.78      |     |     | C   |    |        |        |        |      |
| ATOM       | 121 | O   | ALA | 11 | 9.034  | 0.779  | 19.663 | 1.00 |
| 53.33      |     |     | O   |    |        |        |        |      |
| ATOM       | 122 | CB  | ALA | 11 | 8.054  | -2.403 | 19.496 | 1.00 |
| 60.49      |     |     | C   |    |        |        |        |      |
| ATOM       | 123 | HN  | ALA | 11 | 10.007 | -3.229 | 20.884 | 1.00 |
| 50.37      |     |     | H   |    |        |        |        |      |
| ATOM       | 124 | HA  | ALA | 11 | 9.797  | -1.433 | 18.729 | 1.00 |
| 41.70      |     |     | H   |    |        |        |        |      |

|      |            |     |     |     |        |        |        |      |
|------|------------|-----|-----|-----|--------|--------|--------|------|
| ATOM | 125        | HB1 | ALA | 11  | 7.485  | -1.978 | 18.682 |      |
|      | 1.00157.06 |     |     | H   |        |        |        |      |
| ATOM | 126        | HB2 | ALA | 11  | 7.466  | -2.368 | 20.401 |      |
|      | 1.00148.83 |     |     | H   |        |        |        |      |
| ATOM | 127        | HB3 | ALA | 11  | 8.299  | -3.430 | 19.266 |      |
|      | 1.00137.06 |     |     | H   |        |        |        |      |
| ATOM | 128        | N   | ASP | 12  | 8.718  | -0.272 | 21.627 | 1.00 |
|      | 18.98      |     | N   |     |        |        |        |      |
| ATOM | 129        | CA  | ASP | 12  | 8.396  | 0.957  | 22.344 | 1.00 |
|      | 31.05      |     | C   |     |        |        |        |      |
| ATOM | 130        | C   | ASP | 12  | 9.641  | 1.825  | 22.504 | 1.00 |
|      | 22.98      |     | C   |     |        |        |        |      |
| ATOM | 131        | O   | ASP | 12  | 9.577  | 3.050  | 22.410 | 1.00 |
|      | 37.14      |     | O   |     |        |        |        |      |
| ATOM | 132        | CB  | ASP | 12  | 7.824  | 0.624  | 23.723 | 1.00 |
|      | 48.35      |     | C   |     |        |        |        |      |
| ATOM | 133        | CG  | ASP | 12  | 6.427  | 0.029  | 23.580 |      |
|      | 1.00104.83 |     |     | C   |        |        |        |      |
| ATOM | 134        | OD1 | ASP | 12  | 5.869  | 0.131  | 22.500 |      |
|      | 1.00258.73 |     |     | O   |        |        |        |      |
| ATOM | 135        | OD2 | ASP | 12  | 5.936  | -0.519 | 24.552 |      |
|      | 1.00213.46 |     |     | O1- |        |        |        |      |
| ATOM | 136        | HN  | ASP | 12  | 8.723  | -1.125 | 22.111 | 1.00 |
|      | 36.19      |     | H   |     |        |        |        |      |
| ATOM | 137        | HA  | ASP | 12  | 7.656  | 1.507  | 21.783 | 1.00 |
|      | 49.76      |     | H   |     |        |        |        |      |
| ATOM | 138        | HB1 | ASP | 12  | 7.769  | 1.525  | 24.316 | 1.00 |
|      | 95.71      |     | H   |     |        |        |        |      |
| ATOM | 139        | HB2 | ASP | 12  | 8.469  | -0.090 | 24.217 | 1.00 |
|      | 54.37      |     | H   |     |        |        |        |      |
| ATOM | 140        | N   | GLU | 13  | 10.772 | 1.171  | 22.753 | 1.00 |
|      | 17.60      |     | N   |     |        |        |        |      |
| ATOM | 141        | CA  | GLU | 13  | 12.038 | 1.872  | 22.935 | 1.00 |
|      | 12.01      |     | C   |     |        |        |        |      |
| ATOM | 142        | C   | GLU | 13  | 12.596 | 2.351  | 21.597 | 1.00 |
|      | 10.07      |     | C   |     |        |        |        |      |
| ATOM | 143        | O   | GLU | 13  | 12.121 | 1.946  | 20.535 | 1.00 |
|      | 12.81      |     | O   |     |        |        |        |      |
| ATOM | 144        | CB  | GLU | 13  | 13.043 | 0.940  | 23.601 | 1.00 |
|      | 11.74      |     | C   |     |        |        |        |      |
| ATOM | 145        | CG  | GLU | 13  | 12.497 | 0.495  | 24.960 | 1.00 |
|      | 13.49      |     | C   |     |        |        |        |      |
| ATOM | 146        | CD  | GLU | 13  | 12.548 | 1.654  | 25.948 |      |
|      | 1.00142.36 |     |     | C   |        |        |        |      |
| ATOM | 147        | OE1 | GLU | 13  | 13.150 | 2.660  | 25.618 |      |
|      | 1.00339.06 |     |     | O   |        |        |        |      |
| ATOM | 148        | OE2 | GLU | 13  | 11.985 | 1.519  | 27.021 |      |
|      | 1.00335.28 |     |     | O1- |        |        |        |      |
| ATOM | 149        | HN  | GLU | 13  | 10.752 | 0.194  | 22.820 | 1.00 |
|      | 28.36      |     | H   |     |        |        |        |      |
| ATOM | 150        | HA  | GLU | 13  | 11.882 | 2.726  | 23.576 | 1.00 |
|      | 13.06      |     | H   |     |        |        |        |      |

|       |     |     |     |    |        |        |        |      |
|-------|-----|-----|-----|----|--------|--------|--------|------|
| ATOM  | 151 | HB1 | GLU | 13 | 13.975 | 1.462  | 23.743 | 1.00 |
| 13.76 |     | H   |     |    |        |        |        |      |
| ATOM  | 152 | HB2 | GLU | 13 | 13.206 | 0.075  | 22.974 | 1.00 |
| 9.94  |     | H   |     |    |        |        |        |      |
| ATOM  | 153 | HG1 | GLU | 13 | 13.088 | -0.323 | 25.335 | 1.00 |
| 66.02 |     | H   |     |    |        |        |        |      |
| ATOM  | 154 | HG2 | GLU | 13 | 11.473 | 0.174  | 24.845 | 1.00 |
| 56.23 |     | H   |     |    |        |        |        |      |
| ATOM  | 155 | N   | CYS | 14 | 13.612 | 3.215  | 21.657 | 1.00 |
| 9.12  |     | N   |     |    |        |        |        |      |
| ATOM  | 156 | CA  | CYS | 14 | 14.239 | 3.752  | 20.445 | 1.00 |
| 10.69 |     | C   |     |    |        |        |        |      |
| ATOM  | 157 | C   | CYS | 14 | 15.668 | 3.233  | 20.313 | 1.00 |
| 9.56  |     | C   |     |    |        |        |        |      |
| ATOM  | 158 | O   | CYS | 14 | 16.203 | 2.619  | 21.234 | 1.00 |
| 13.62 |     | O   |     |    |        |        |        |      |
| ATOM  | 159 | CB  | CYS | 14 | 14.264 | 5.283  | 20.501 | 1.00 |
| 13.96 |     | C   |     |    |        |        |        |      |
| ATOM  | 160 | SG  | CYS | 14 | 15.504 | 5.826  | 21.695 | 1.00 |
| 42.96 |     | S   |     |    |        |        |        |      |
| ATOM  | 161 | HN  | CYS | 14 | 13.948 | 3.498  | 22.535 | 1.00 |
| 9.76  |     | H   |     |    |        |        |        |      |
| ATOM  | 162 | HA  | CYS | 14 | 13.675 | 3.444  | 19.575 | 1.00 |
| 15.54 |     | H   |     |    |        |        |        |      |
| ATOM  | 163 | HB1 | CYS | 14 | 13.298 | 5.650  | 20.803 | 1.00 |
| 50.72 |     | H   |     |    |        |        |        |      |
| ATOM  | 164 | HB2 | CYS | 14 | 14.509 | 5.675  | 19.525 | 1.00 |
| 46.13 |     | H   |     |    |        |        |        |      |
| ATOM  | 165 | N   | CYS | 15 | 16.280 | 3.500  | 19.163 | 1.00 |
| 9.60  |     | N   |     |    |        |        |        |      |
| ATOM  | 166 | CA  | CYS | 15 | 17.653 | 3.073  | 18.911 | 1.00 |
| 9.28  |     | C   |     |    |        |        |        |      |
| ATOM  | 167 | C   | CYS | 15 | 18.306 | 4.025  | 17.918 | 1.00 |
| 9.92  |     | C   |     |    |        |        |        |      |
| ATOM  | 168 | O   | CYS | 15 | 17.764 | 4.276  | 16.842 | 1.00 |
| 13.31 |     | O   |     |    |        |        |        |      |
| ATOM  | 169 | CB  | CYS | 15 | 17.663 | 1.653  | 18.339 | 1.00 |
| 12.90 |     | C   |     |    |        |        |        |      |
| ATOM  | 170 | SG  | CYS | 15 | 19.373 | 1.106  | 18.097 | 1.00 |
| 39.11 |     | S   |     |    |        |        |        |      |
| ATOM  | 171 | HN  | CYS | 15 | 15.803 | 4.003  | 18.471 | 1.00 |
| 13.12 |     | H   |     |    |        |        |        |      |
| ATOM  | 172 | HA  | CYS | 15 | 18.211 | 3.085  | 19.838 | 1.00 |
| 8.26  |     | H   |     |    |        |        |        |      |
| ATOM  | 173 | HB1 | CYS | 15 | 17.146 | 1.642  | 17.391 | 1.00 |
| 24.82 |     | H   |     |    |        |        |        |      |
| ATOM  | 174 | HB2 | CYS | 15 | 17.166 | 0.985  | 19.027 | 1.00 |
| 27.31 |     | H   |     |    |        |        |        |      |
| ATOM  | 175 | N   | VAL | 16 | 19.468 | 4.564  | 18.280 | 1.00 |
| 9.56  |     | N   |     |    |        |        |        |      |
| ATOM  | 176 | CA  | VAL | 16 | 20.168 | 5.495  | 17.399 | 1.00 |
| 11.99 |     | C   |     |    |        |        |        |      |

|            |     |      |     |    |        |       |        |      |
|------------|-----|------|-----|----|--------|-------|--------|------|
| ATOM       | 177 | C    | VAL | 16 | 21.675 | 5.382 | 17.592 | 1.00 |
| 7.73       |     | C    |     |    |        |       |        |      |
| ATOM       | 178 | O    | VAL | 16 | 22.174 | 5.425 | 18.717 | 1.00 |
| 8.83       |     | O    |     |    |        |       |        |      |
| ATOM       | 179 | CB   | VAL | 16 | 19.711 | 6.925 | 17.698 | 1.00 |
| 18.37      |     | C    |     |    |        |       |        |      |
| ATOM       | 180 | CG1  | VAL | 16 | 20.047 | 7.280 | 19.147 | 1.00 |
| 39.61      |     | C    |     |    |        |       |        |      |
| ATOM       | 181 | CG2  | VAL | 16 | 20.424 | 7.894 | 16.754 |      |
| 1.00115.21 |     |      | C   |    |        |       |        |      |
| ATOM       | 182 | HN   | VAL | 16 | 19.859 | 4.337 | 19.151 | 1.00 |
| 9.76       |     | H    |     |    |        |       |        |      |
| ATOM       | 183 | HA   | VAL | 16 | 19.934 | 5.263 | 16.370 | 1.00 |
| 17.27      |     | H    |     |    |        |       |        |      |
| ATOM       | 184 | HB   | VAL | 16 | 18.644 | 6.996 | 17.548 | 1.00 |
| 52.63      |     | H    |     |    |        |       |        |      |
| ATOM       | 185 | HG11 | VAL | 16 | 19.764 | 6.462 | 19.793 |      |
| 1.00128.07 |     |      | H   |    |        |       |        |      |
| ATOM       | 186 | HG12 | VAL | 16 | 19.505 | 8.169 | 19.435 |      |
| 1.00154.13 |     |      | H   |    |        |       |        |      |
| ATOM       | 187 | HG13 | VAL | 16 | 21.108 | 7.461 | 19.240 |      |
| 1.00135.74 |     |      | H   |    |        |       |        |      |
| ATOM       | 188 | HG21 | VAL | 16 | 20.287 | 7.569 | 15.734 |      |
| 1.00229.05 |     |      | H   |    |        |       |        |      |
| ATOM       | 189 | HG22 | VAL | 16 | 21.479 | 7.915 | 16.988 |      |
| 1.00261.82 |     |      | H   |    |        |       |        |      |
| ATOM       | 190 | HG23 | VAL | 16 | 20.008 | 8.884 | 16.875 |      |
| 1.00210.07 |     |      | H   |    |        |       |        |      |
| ATOM       | 191 | N    | ASP | 17 | 22.399 | 5.233 | 16.481 | 1.00 |
| 14.34      |     | N    |     |    |        |       |        |      |
| ATOM       | 192 | CA   | ASP | 17 | 23.858 | 5.110 | 16.523 | 1.00 |
| 11.90      |     | C    |     |    |        |       |        |      |
| ATOM       | 193 | C    | ASP | 17 | 24.520 | 6.298 | 15.838 | 1.00 |
| 13.15      |     | C    |     |    |        |       |        |      |
| ATOM       | 194 | O    | ASP | 17 | 24.136 | 6.690 | 14.736 | 1.00 |
| 25.96      |     | O    |     |    |        |       |        |      |
| ATOM       | 195 | CB   | ASP | 17 | 24.292 | 3.819 | 15.827 | 1.00 |
| 20.80      |     | C    |     |    |        |       |        |      |
| ATOM       | 196 | CG   | ASP | 17 | 23.644 | 2.618 | 16.508 | 1.00 |
| 28.72      |     | C    |     |    |        |       |        |      |
| ATOM       | 197 | OD1  | ASP | 17 | 23.717 | 2.541 | 17.724 |      |
| 1.00135.42 |     |      | O   |    |        |       |        |      |
| ATOM       | 198 | OD2  | ASP | 17 | 23.081 | 1.795 | 15.804 |      |
| 1.00114.17 |     |      | O1- |    |        |       |        |      |
| ATOM       | 199 | HN   | ASP | 17 | 21.943 | 5.205 | 15.614 | 1.00 |
| 28.29      |     | H    |     |    |        |       |        |      |
| ATOM       | 200 | HA   | ASP | 17 | 24.191 | 5.075 | 17.552 | 1.00 |
| 10.49      |     | H    |     |    |        |       |        |      |
| ATOM       | 201 | HB1  | ASP | 17 | 25.368 | 3.726 | 15.886 | 1.00 |
| 22.42      |     | H    |     |    |        |       |        |      |
| ATOM       | 202 | HB2  | ASP | 17 | 23.991 | 3.851 | 14.791 | 1.00 |
| 29.52      |     | H    |     |    |        |       |        |      |



|            |     |      |     |    |        |        |        |      |
|------------|-----|------|-----|----|--------|--------|--------|------|
| ATOM       | 203 | N    | THR | 18 | 25.534 | 6.854  | 16.495 | 1.00 |
| 11.55      |     |      | N   |    |        |        |        |      |
| ATOM       | 204 | CA   | THR | 18 | 26.281 | 7.990  | 15.957 | 1.00 |
| 17.10      |     |      | C   |    |        |        |        |      |
| ATOM       | 205 | C    | THR | 18 | 27.766 | 7.672  | 15.957 | 1.00 |
| 10.63      |     |      | C   |    |        |        |        |      |
| ATOM       | 206 | O    | THR | 18 | 28.211 | 6.768  | 16.661 | 1.00 |
| 6.49       |     |      | O   |    |        |        |        |      |
| ATOM       | 207 | CB   | THR | 18 | 26.031 | 9.242  | 16.800 | 1.00 |
| 28.52      |     |      | C   |    |        |        |        |      |
| ATOM       | 208 | CG2  | THR | 18 | 24.618 | 9.763  | 16.552 | 1.00 |
| 45.38      |     |      | C   |    |        |        |        |      |
| ATOM       | 209 | OG1  | THR | 18 | 26.194 | 8.924  | 18.172 | 1.00 |
| 26.49      |     |      | O   |    |        |        |        |      |
| ATOM       | 210 | HN   | THR | 18 | 25.796 | 6.483  | 17.364 | 1.00 |
| 13.96      |     |      | H   |    |        |        |        |      |
| ATOM       | 211 | HA   | THR | 18 | 25.967 | 8.185  | 14.940 | 1.00 |
| 26.43      |     |      | H   |    |        |        |        |      |
| ATOM       | 212 | HB   | THR | 18 | 26.742 | 10.006 | 16.523 | 1.00 |
| 37.43      |     |      | H   |    |        |        |        |      |
| ATOM       | 213 | HG1  | THR | 18 | 25.433 | 9.266  | 18.648 | 1.00 |
| 71.62      |     |      | H   |    |        |        |        |      |
| ATOM       | 214 | HG21 | THR | 18 | 23.924 | 8.938  | 16.558 |      |
| 1.00100.44 |     |      |     |    |        |        |        | H    |
| ATOM       | 215 | HG22 | THR | 18 | 24.585 | 10.258 | 15.592 |      |
| 1.00129.42 |     |      |     |    |        |        |        | H    |
| ATOM       | 216 | HG23 | THR | 18 | 24.355 | 10.465 | 17.329 |      |
| 1.00156.21 |     |      |     |    |        |        |        | H    |
| ATOM       | 217 | N    | VAL | 19 | 28.527 | 8.426  | 15.178 | 1.00 |
| 16.32      |     |      | N   |    |        |        |        |      |
| ATOM       | 218 | CA   | VAL | 19 | 29.951 | 8.233  | 15.097 | 1.00 |
| 13.34      |     |      | C   |    |        |        |        |      |
| ATOM       | 219 | C    | VAL | 19 | 30.546 | 9.258  | 14.155 | 1.00 |
| 25.88      |     |      | C   |    |        |        |        |      |
| ATOM       | 220 | O    | VAL | 19 | 30.245 | 9.300  | 12.963 | 1.00 |
| 42.11      |     |      | O   |    |        |        |        |      |
| ATOM       | 221 | CB   | VAL | 19 | 30.304 | 6.822  | 14.625 | 1.00 |
| 15.48      |     |      | C   |    |        |        |        |      |
| ATOM       | 222 | CG1  | VAL | 19 | 29.528 | 6.479  | 13.349 | 1.00 |
| 29.06      |     |      | C   |    |        |        |        |      |
| ATOM       | 223 | CG2  | VAL | 19 | 31.812 | 6.754  | 14.344 | 1.00 |
| 20.67      |     |      | C   |    |        |        |        |      |
| ATOM       | 224 | HN   | VAL | 19 | 28.126 | 9.145  | 14.656 | 1.00 |
| 26.89      |     |      | H   |    |        |        |        |      |
| ATOM       | 225 | HA   | VAL | 19 | 30.373 | 8.382  | 16.081 | 1.00 |
| 8.08       |     |      | H   |    |        |        |        |      |
| ATOM       | 226 | HB   | VAL | 19 | 30.051 | 6.120  | 15.401 | 1.00 |
| 11.49      |     |      | H   |    |        |        |        |      |
| ATOM       | 227 | HG11 | VAL | 19 | 28.492 | 6.757  | 13.468 |      |
| 1.00137.43 |     |      |     |    |        |        |        | H    |
| ATOM       | 228 | HG12 | VAL | 19 | 29.595 | 5.417  | 13.163 | 1.00 |
| 93.29      |     |      | H   |    |        |        |        |      |

|            |     |      |     |    |        |        |        |      |
|------------|-----|------|-----|----|--------|--------|--------|------|
| ATOM       | 229 | HG13 | VAL | 19 | 29.951 | 7.017  | 12.514 |      |
| 1.00108.69 |     |      |     |    |        |        |        |      |
| ATOM       | 230 | HG21 | VAL | 19 | 32.024 | 7.249  | 13.406 | 1.00 |
| 99.42      |     |      | H   |    |        |        |        |      |
| ATOM       | 231 | HG22 | VAL | 19 | 32.124 | 5.722  | 14.288 |      |
| 1.00111.36 |     |      |     |    |        |        |        |      |
| ATOM       | 232 | HG23 | VAL | 19 | 32.349 | 7.253  | 15.140 | 1.00 |
| 77.11      |     |      | H   |    |        |        |        |      |
| ATOM       | 233 | N    | PHE | 20 | 31.383 | 10.080 | 14.727 | 1.00 |
| 24.58      |     |      | N   |    |        |        |        |      |
| ATOM       | 234 | CA   | PHE | 20 | 32.055 | 11.143 | 14.004 | 1.00 |
| 40.34      |     |      | C   |    |        |        |        |      |
| ATOM       | 235 | C    | PHE | 20 | 33.456 | 10.715 | 13.600 | 1.00 |
| 40.37      |     |      | C   |    |        |        |        |      |
| ATOM       | 236 | O    | PHE | 20 | 33.837 | 10.822 | 12.433 | 1.00 |
| 66.02      |     |      | O   |    |        |        |        |      |
| ATOM       | 237 | CB   | PHE | 20 | 32.123 | 12.396 | 14.892 | 1.00 |
| 48.79      |     |      | C   |    |        |        |        |      |
| ATOM       | 238 | CG   | PHE | 20 | 32.241 | 12.016 | 16.362 | 1.00 |
| 35.75      |     |      | C   |    |        |        |        |      |
| ATOM       | 239 | CD1  | PHE | 20 | 31.170 | 11.388 | 17.033 | 1.00 |
| 30.20      |     |      | C   |    |        |        |        |      |
| ATOM       | 240 | CD2  | PHE | 20 | 33.417 | 12.315 | 17.064 | 1.00 |
| 40.95      |     |      | C   |    |        |        |        |      |
| ATOM       | 241 | CE1  | PHE | 20 | 31.290 | 11.064 | 18.386 | 1.00 |
| 30.41      |     |      | C   |    |        |        |        |      |
| ATOM       | 242 | CE2  | PHE | 20 | 33.530 | 11.985 | 18.420 | 1.00 |
| 45.84      |     |      | C   |    |        |        |        |      |
| ATOM       | 243 | CZ   | PHE | 20 | 32.468 | 11.361 | 19.081 | 1.00 |
| 40.81      |     |      | C   |    |        |        |        |      |
| ATOM       | 244 | HN   | PHE | 20 | 31.545 | 9.975  | 15.678 | 1.00 |
| 16.73      |     |      | H   |    |        |        |        |      |
| ATOM       | 245 | HA   | PHE | 20 | 31.494 | 11.379 | 13.108 | 1.00 |
| 59.91      |     |      | H   |    |        |        |        |      |
| ATOM       | 246 | HB1  | PHE | 20 | 31.233 | 12.961 | 14.752 | 1.00 |
| 67.15      |     |      | H   |    |        |        |        |      |
| ATOM       | 247 | HB2  | PHE | 20 | 32.970 | 13.003 | 14.607 | 1.00 |
| 58.17      |     |      | H   |    |        |        |        |      |
| ATOM       | 248 | HD1  | PHE | 20 | 30.256 | 11.147 | 16.506 | 1.00 |
| 33.34      |     |      | H   |    |        |        |        |      |
| ATOM       | 249 | HD2  | PHE | 20 | 34.240 | 12.796 | 16.558 | 1.00 |
| 49.35      |     |      | H   |    |        |        |        |      |
| ATOM       | 250 | HE1  | PHE | 20 | 30.470 | 10.582 | 18.896 | 1.00 |
| 30.61      |     |      | H   |    |        |        |        |      |
| ATOM       | 251 | HE2  | PHE | 20 | 34.438 | 12.214 | 18.957 | 1.00 |
| 61.27      |     |      | H   |    |        |        |        |      |
| ATOM       | 252 | HZ   | PHE | 20 | 32.556 | 11.108 | 20.126 | 1.00 |
| 52.66      |     |      | H   |    |        |        |        |      |
| ATOM       | 253 | N    | GLU | 21 | 34.231 | 10.260 | 14.576 | 1.00 |
| 41.31      |     |      | N   |    |        |        |        |      |
| ATOM       | 254 | CA   | GLU | 21 | 35.594 | 9.855  | 14.341 | 1.00 |
| 56.16      |     |      | C   |    |        |        |        |      |

|            |     |     |     |    |        |        |        |      |
|------------|-----|-----|-----|----|--------|--------|--------|------|
| ATOM       | 255 | C   | GLU | 21 | 35.812 | 8.397  | 14.713 | 1.00 |
| 58.61      |     |     | C   |    |        |        |        |      |
| ATOM       | 256 | O   | GLU | 21 | 34.886 | 7.695  | 15.117 |      |
| 1.00201.19 |     |     | O   |    |        |        |        |      |
| ATOM       | 257 | CB  | GLU | 21 | 36.472 | 10.744 | 15.190 | 1.00 |
| 57.37      |     |     | C   |    |        |        |        |      |
| ATOM       | 258 | CG  | GLU | 21 | 36.225 | 10.455 | 16.670 |      |
| 1.00193.56 |     |     | C   |    |        |        |        |      |
| ATOM       | 259 | CD  | GLU | 21 | 36.878 | 11.538 | 17.525 |      |
| 1.00304.62 |     |     | C   |    |        |        |        |      |
| ATOM       | 260 | OE1 | GLU | 21 | 36.674 | 11.522 | 18.728 |      |
| 1.00451.81 |     |     | O   |    |        |        |        |      |
| ATOM       | 261 | OE2 | GLU | 21 | 37.574 | 12.367 | 16.964 |      |
| 1.00442.88 |     |     | O1- |    |        |        |        |      |
| ATOM       | 262 | HN  | GLU | 21 | 33.892 | 10.227 | 15.488 | 1.00 |
| 50.82      |     |     | H   |    |        |        |        |      |
| ATOM       | 263 | HA  | GLU | 21 | 35.857 | 9.998  | 13.302 | 1.00 |
| 85.72      |     |     | H   |    |        |        |        |      |
| ATOM       | 264 | HB1 | GLU | 21 | 36.223 | 11.770 | 14.982 | 1.00 |
| 46.37      |     |     | H   |    |        |        |        |      |
| ATOM       | 265 | HB2 | GLU | 21 | 37.494 | 10.561 | 14.952 |      |
| 1.00131.81 |     |     | H   |    |        |        |        |      |
| ATOM       | 266 | HG1 | GLU | 21 | 36.649 | 9.499  | 16.924 |      |
| 1.00314.91 |     |     | H   |    |        |        |        |      |
| ATOM       | 267 | HG2 | GLU | 21 | 35.165 | 10.436 | 16.860 |      |
| 1.00266.92 |     |     | H   |    |        |        |        |      |
| ATOM       | 268 | N   | GLY | 22 | 37.051 | 7.958  | 14.564 | 1.00 |
| 86.70      |     |     | N   |    |        |        |        |      |
| ATOM       | 269 | CA  | GLY | 22 | 37.418 | 6.574  | 14.875 |      |
| 1.00104.66 |     |     | C   |    |        |        |        |      |
| ATOM       | 270 | C   | GLY | 22 | 37.912 | 6.448  | 16.313 | 1.00 |
| 71.50      |     |     | C   |    |        |        |        |      |
| ATOM       | 271 | O   | GLY | 22 | 38.079 | 5.341  | 16.827 | 1.00 |
| 89.87      |     |     | O   |    |        |        |        |      |
| ATOM       | 272 | HN  | GLY | 22 | 37.737 | 8.580  | 14.237 |      |
| 1.00214.64 |     |     | H   |    |        |        |        |      |
| ATOM       | 273 | HA1 | GLY | 22 | 38.206 | 6.259  | 14.208 |      |
| 1.00152.47 |     |     | H   |    |        |        |        |      |
| ATOM       | 274 | HA2 | GLY | 22 | 36.559 | 5.932  | 14.737 |      |
| 1.00118.15 |     |     | H   |    |        |        |        |      |
| ATOM       | 275 | N   | ASP | 23 | 38.149 | 7.585  | 16.952 | 1.00 |
| 44.68      |     |     | N   |    |        |        |        |      |
| ATOM       | 276 | CA  | ASP | 23 | 38.632 | 7.595  | 18.328 | 1.00 |
| 43.33      |     |     | C   |    |        |        |        |      |
| ATOM       | 277 | C   | ASP | 23 | 37.617 | 6.961  | 19.271 | 1.00 |
| 37.55      |     |     | C   |    |        |        |        |      |
| ATOM       | 278 | O   | ASP | 23 | 37.976 | 6.174  | 20.147 | 1.00 |
| 61.37      |     |     | O   |    |        |        |        |      |
| ATOM       | 279 | CB  | ASP | 23 | 38.905 | 9.031  | 18.773 | 1.00 |
| 40.74      |     |     | C   |    |        |        |        |      |
| ATOM       | 280 | CG  | ASP | 23 | 39.575 | 9.035  | 20.142 |      |
| 1.00141.86 |     |     | C   |    |        |        |        |      |

|            |     |     |     |    |        |        |        |      |
|------------|-----|-----|-----|----|--------|--------|--------|------|
| ATOM       | 281 | OD1 | ASP | 23 | 39.617 | 7.985  | 20.762 |      |
| 1.00328.18 |     |     |     |    |        |        |        | O    |
| ATOM       | 282 | OD2 | ASP | 23 | 40.037 | 10.088 | 20.551 |      |
| 1.00304.58 |     |     |     |    |        |        |        | O1-  |
| ATOM       | 283 | HN  | ASP | 23 | 38.005 | 8.435  | 16.488 | 1.00 |
| 40.86      |     |     | H   |    |        |        |        |      |
| ATOM       | 284 | HA  | ASP | 23 | 39.550 | 7.035  | 18.379 | 1.00 |
| 72.12      |     |     | H   |    |        |        |        |      |
| ATOM       | 285 | HB1 | ASP | 23 | 37.971 | 9.568  | 18.833 | 1.00 |
| 94.15      |     |     | H   |    |        |        |        |      |
| ATOM       | 286 | HB2 | ASP | 23 | 39.550 | 9.515  | 18.054 | 1.00 |
| 93.26      |     |     | H   |    |        |        |        |      |
| ATOM       | 287 | N   | MET | 24 | 36.352 | 7.320  | 19.093 | 1.00 |
| 23.24      |     |     | N   |    |        |        |        |      |
| ATOM       | 288 | CA  | MET | 24 | 35.287 | 6.791  | 19.944 | 1.00 |
| 32.50      |     |     | C   |    |        |        |        |      |
| ATOM       | 289 | C   | MET | 24 | 33.943 | 6.829  | 19.222 | 1.00 |
| 25.13      |     |     | C   |    |        |        |        |      |
| ATOM       | 290 | O   | MET | 24 | 33.680 | 7.728  | 18.421 | 1.00 |
| 54.40      |     |     | O   |    |        |        |        |      |
| ATOM       | 291 | CB  | MET | 24 | 35.201 | 7.619  | 21.230 | 1.00 |
| 47.36      |     |     | C   |    |        |        |        |      |
| ATOM       | 292 | CG  | MET | 24 | 34.107 | 7.056  | 22.140 |      |
| 1.00151.73 |     |     |     |    |        |        |        | C    |
| ATOM       | 293 | SD  | MET | 24 | 34.115 | 7.948  | 23.716 |      |
| 1.00209.23 |     |     |     |    |        |        |        | S    |
| ATOM       | 294 | CE  | MET | 24 | 33.498 | 9.536  | 23.099 |      |
| 1.00243.29 |     |     |     |    |        |        |        | C    |
| ATOM       | 295 | HN  | MET | 24 | 36.132 | 7.957  | 18.384 | 1.00 |
| 17.32      |     |     | H   |    |        |        |        |      |
| ATOM       | 296 | HA  | MET | 24 | 35.515 | 5.769  | 20.204 | 1.00 |
| 48.94      |     |     | H   |    |        |        |        |      |
| ATOM       | 297 | HB1 | MET | 24 | 34.967 | 8.644  | 20.980 |      |
| 1.00124.40 |     |     |     |    |        |        |        | H    |
| ATOM       | 298 | HB2 | MET | 24 | 36.150 | 7.582  | 21.744 |      |
| 1.00166.96 |     |     |     |    |        |        |        | H    |
| ATOM       | 299 | HG1 | MET | 24 | 34.294 | 6.007  | 22.320 |      |
| 1.00331.71 |     |     |     |    |        |        |        | H    |
| ATOM       | 300 | HG2 | MET | 24 | 33.143 | 7.171  | 21.665 |      |
| 1.00302.30 |     |     |     |    |        |        |        | H    |
| ATOM       | 301 | HE1 | MET | 24 | 33.045 | 10.084 | 23.913 |      |
| 1.00340.44 |     |     |     |    |        |        |        | H    |
| ATOM       | 302 | HE2 | MET | 24 | 32.762 | 9.367  | 22.331 |      |
| 1.00373.88 |     |     |     |    |        |        |        | H    |
| ATOM       | 303 | HE3 | MET | 24 | 34.321 | 10.106 | 22.689 |      |
| 1.00386.81 |     |     |     |    |        |        |        | H    |
| ATOM       | 304 | N   | VAL | 25 | 33.088 | 5.849  | 19.522 | 1.00 |
| 22.44      |     |     | N   |    |        |        |        |      |
| ATOM       | 305 | CA  | VAL | 25 | 31.760 | 5.767  | 18.910 | 1.00 |
| 15.37      |     |     | C   |    |        |        |        |      |
| ATOM       | 306 | C   | VAL | 25 | 30.683 | 6.141  | 19.924 | 1.00 |
| 17.47      |     |     | C   |    |        |        |        |      |

|            |     |      |     |    |        |        |        |      |
|------------|-----|------|-----|----|--------|--------|--------|------|
| ATOM       | 307 | O    | VAL | 25 | 30.783 | 5.816  | 21.107 | 1.00 |
| 29.52      |     | O    |     |    |        |        |        |      |
| ATOM       | 308 | CB   | VAL | 25 | 31.495 | 4.351  | 18.382 | 1.00 |
| 23.36      |     | C    |     |    |        |        |        |      |
| ATOM       | 309 | CG1  | VAL | 25 | 30.028 | 4.232  | 17.932 | 1.00 |
| 58.39      |     | C    |     |    |        |        |        |      |
| ATOM       | 310 | CG2  | VAL | 25 | 32.418 | 4.078  | 17.191 | 1.00 |
| 55.25      |     | C    |     |    |        |        |        |      |
| ATOM       | 311 | HN   | VAL | 25 | 33.356 | 5.166  | 20.173 | 1.00 |
| 48.11      |     | H    |     |    |        |        |        |      |
| ATOM       | 312 | HA   | VAL | 25 | 31.703 | 6.462  | 18.079 | 1.00 |
| 9.25       |     | H    |     |    |        |        |        |      |
| ATOM       | 313 | HB   | VAL | 25 | 31.691 | 3.633  | 19.165 | 1.00 |
| 52.45      |     | H    |     |    |        |        |        |      |
| ATOM       | 314 | HG11 | VAL | 25 | 29.713 | 5.158  | 17.472 |      |
| 1.00171.07 |     |      |     |    |        |        |        | H    |
| ATOM       | 315 | HG12 | VAL | 25 | 29.407 | 4.031  | 18.791 |      |
| 1.00166.22 |     |      |     |    |        |        |        | H    |
| ATOM       | 316 | HG13 | VAL | 25 | 29.928 | 3.423  | 17.221 |      |
| 1.00134.76 |     |      |     |    |        |        |        | H    |
| ATOM       | 317 | HG21 | VAL | 25 | 33.441 | 4.023  | 17.532 |      |
| 1.00141.88 |     |      |     |    |        |        |        | H    |
| ATOM       | 318 | HG22 | VAL | 25 | 32.321 | 4.873  | 16.468 |      |
| 1.00184.50 |     |      |     |    |        |        |        | H    |
| ATOM       | 319 | HG23 | VAL | 25 | 32.142 | 3.140  | 16.731 |      |
| 1.00133.90 |     |      |     |    |        |        |        | H    |
| ATOM       | 320 | N    | THR | 26 | 29.656 | 6.834  | 19.439 | 1.00 |
| 13.60      |     | N    |     |    |        |        |        |      |
| ATOM       | 321 | CA   | THR | 26 | 28.545 | 7.276  | 20.281 | 1.00 |
| 21.19      |     | C    |     |    |        |        |        |      |
| ATOM       | 322 | C    | THR | 26 | 27.235 | 6.631  | 19.833 | 1.00 |
| 16.55      |     | C    |     |    |        |        |        |      |
| ATOM       | 323 | O    | THR | 26 | 26.921 | 6.601  | 18.643 | 1.00 |
| 11.43      |     | O    |     |    |        |        |        |      |
| ATOM       | 324 | CB   | THR | 26 | 28.429 | 8.794  | 20.186 | 1.00 |
| 27.07      |     | C    |     |    |        |        |        |      |
| ATOM       | 325 | CG2  | THR | 26 | 27.220 | 9.283  | 20.988 | 1.00 |
| 44.39      |     | C    |     |    |        |        |        |      |
| ATOM       | 326 | OG1  | THR | 26 | 29.613 | 9.383  | 20.703 | 1.00 |
| 34.75      |     | O    |     |    |        |        |        |      |
| ATOM       | 327 | HN   | THR | 26 | 29.647 | 7.061  | 18.487 | 1.00 |
| 10.81      |     | H    |     |    |        |        |        |      |
| ATOM       | 328 | HA   | THR | 26 | 28.735 | 7.005  | 21.311 | 1.00 |
| 33.16      |     | H    |     |    |        |        |        |      |
| ATOM       | 329 | HB   | THR | 26 | 28.312 | 9.076  | 19.147 | 1.00 |
| 20.60      |     | H    |     |    |        |        |        |      |
| ATOM       | 330 | HG1  | THR | 26 | 30.026 | 8.749  | 21.293 | 1.00 |
| 77.72      |     | H    |     |    |        |        |        |      |
| ATOM       | 331 | HG21 | THR | 26 | 27.234 | 10.362 | 21.038 |      |
| 1.00126.99 |     |      |     |    |        |        |        | H    |
| ATOM       | 332 | HG22 | THR | 26 | 27.266 | 8.877  | 21.989 |      |
| 1.00108.32 |     |      |     |    |        |        |        | H    |

|            |     |      |     |    |        |        |        |      |
|------------|-----|------|-----|----|--------|--------|--------|------|
| ATOM       | 333 | HG23 | THR | 26 | 26.308 | 8.958  | 20.511 |      |
| 1.00151.99 |     |      | H   |    |        |        |        |      |
| ATOM       | 334 | N    | ARG | 27 | 26.473 | 6.118  | 20.797 | 1.00 |
| 22.38      |     |      | N   |    |        |        |        |      |
| ATOM       | 335 | CA   | ARG | 27 | 25.193 | 5.474  | 20.503 | 1.00 |
| 20.21      |     |      | C   |    |        |        |        |      |
| ATOM       | 336 | C    | ARG | 27 | 24.245 | 5.610  | 21.689 | 1.00 |
| 16.96      |     |      | C   |    |        |        |        |      |
| ATOM       | 337 | O    | ARG | 27 | 24.672 | 5.921  | 22.801 | 1.00 |
| 20.06      |     |      | O   |    |        |        |        |      |
| ATOM       | 338 | CB   | ARG | 27 | 25.415 | 3.992  | 20.192 | 1.00 |
| 22.14      |     |      | C   |    |        |        |        |      |
| ATOM       | 339 | CG   | ARG | 27 | 25.991 | 3.296  | 21.425 |      |
| 1.00124.30 |     |      | C   |    |        |        |        |      |
| ATOM       | 340 | CD   | ARG | 27 | 26.437 | 1.879  | 21.052 |      |
| 1.00109.38 |     |      | C   |    |        |        |        |      |
| ATOM       | 341 | NE   | ARG | 27 | 25.284 | 1.074  | 20.661 |      |
| 1.00227.73 |     |      | N   |    |        |        |        |      |
| ATOM       | 342 | CZ   | ARG | 27 | 24.557 | 0.421  | 21.565 |      |
| 1.00426.12 |     |      | C   |    |        |        |        |      |
| ATOM       | 343 | NH1  | ARG | 27 | 23.535 | -0.296 | 21.186 |      |
| 1.00767.09 |     |      | N1+ |    |        |        |        |      |
| ATOM       | 344 | NH2  | ARG | 27 | 24.865 | 0.500  | 22.830 |      |
| 1.00581.78 |     |      | N   |    |        |        |        |      |
| ATOM       | 345 | HN   | ARG | 27 | 26.777 | 6.174  | 21.728 | 1.00 |
| 30.75      |     |      | H   |    |        |        |        |      |
| ATOM       | 346 | HA   | ARG | 27 | 24.747 | 5.948  | 19.642 | 1.00 |
| 23.13      |     |      | H   |    |        |        |        |      |
| ATOM       | 347 | HB1  | ARG | 27 | 26.109 | 3.896  | 19.370 | 1.00 |
| 87.46      |     |      | H   |    |        |        |        |      |
| ATOM       | 348 | HB2  | ARG | 27 | 24.475 | 3.535  | 19.926 |      |
| 1.00103.36 |     |      | H   |    |        |        |        |      |
| ATOM       | 349 | HG1  | ARG | 27 | 25.236 | 3.241  | 22.195 |      |
| 1.00281.97 |     |      | H   |    |        |        |        |      |
| ATOM       | 350 | HG2  | ARG | 27 | 26.840 | 3.855  | 21.792 |      |
| 1.00276.19 |     |      | H   |    |        |        |        |      |
| ATOM       | 351 | HD1  | ARG | 27 | 26.928 | 1.424  | 21.902 |      |
| 1.00183.60 |     |      | H   |    |        |        |        |      |
| ATOM       | 352 | HD2  | ARG | 27 | 27.130 | 1.931  | 20.228 |      |
| 1.00142.93 |     |      | H   |    |        |        |        |      |
| ATOM       | 353 | HE   | ARG | 27 | 25.041 | 1.011  | 19.713 |      |
| 1.00372.53 |     |      | H   |    |        |        |        |      |
| ATOM       | 354 | HH11 | ARG | 27 | 23.298 | -0.356 | 20.216 |      |
| 1.00910.59 |     |      | H   |    |        |        |        |      |
| ATOM       | 355 | HH12 | ARG | 27 | 22.989 | -0.787 | 21.864 |      |
| 1.00999.99 |     |      | H   |    |        |        |        |      |
| ATOM       | 356 | HH21 | ARG | 27 | 25.648 | 1.050  | 23.122 |      |
| 1.00532.54 |     |      | H   |    |        |        |        |      |
| ATOM       | 357 | HH22 | ARG | 27 | 24.320 | 0.008  | 23.510 |      |
| 1.00948.84 |     |      | H   |    |        |        |        |      |
| ATOM       | 358 | N    | SER | 28 | 22.952 | 5.380  | 21.449 | 1.00 |
| 14.60      |     |      | N   |    |        |        |        |      |

|            |     |     |     |    |        |       |        |      |
|------------|-----|-----|-----|----|--------|-------|--------|------|
| ATOM       | 359 | CA  | SER | 28 | 21.955 | 5.487 | 22.515 | 1.00 |
| 14.92      |     |     | C   |    |        |       |        |      |
| ATOM       | 360 | C   | SER | 28 | 20.797 | 4.526 | 22.272 | 1.00 |
| 12.12      |     |     | C   |    |        |       |        |      |
| ATOM       | 361 | O   | SER | 28 | 20.440 | 4.238 | 21.130 | 1.00 |
| 13.41      |     |     | O   |    |        |       |        |      |
| ATOM       | 362 | CB  | SER | 28 | 21.425 | 6.919 | 22.594 | 1.00 |
| 23.26      |     |     | C   |    |        |       |        |      |
| ATOM       | 363 | OG  | SER | 28 | 20.449 | 7.002 | 23.625 |      |
| 1.00146.32 |     |     | O   |    |        |       |        |      |
| ATOM       | 364 | HN  | SER | 28 | 22.663 | 5.138 | 20.543 | 1.00 |
| 15.23      |     |     | H   |    |        |       |        |      |
| ATOM       | 365 | HA  | SER | 28 | 22.418 | 5.238 | 23.460 | 1.00 |
| 15.44      |     |     | H   |    |        |       |        |      |
| ATOM       | 366 | HB1 | SER | 28 | 20.987 | 7.193 | 21.645 | 1.00 |
| 88.73      |     |     | H   |    |        |       |        |      |
| ATOM       | 367 | HB2 | SER | 28 | 22.236 | 7.593 | 22.818 |      |
| 1.00124.68 |     |     | H   |    |        |       |        |      |
| ATOM       | 368 | HG  | SER | 28 | 20.872 | 7.370 | 24.404 |      |
| 1.00242.47 |     |     | H   |    |        |       |        |      |
| ATOM       | 369 | N   | CYS | 29 | 20.215 | 4.036 | 23.362 | 1.00 |
| 10.48      |     |     | N   |    |        |       |        |      |
| ATOM       | 370 | CA  | CYS | 29 | 19.094 | 3.108 | 23.278 | 1.00 |
| 9.97       |     |     | C   |    |        |       |        |      |
| ATOM       | 371 | C   | CYS | 29 | 18.477 | 2.932 | 24.663 | 1.00 |
| 11.60      |     |     | C   |    |        |       |        |      |
| ATOM       | 372 | O   | CYS | 29 | 19.124 | 2.422 | 25.579 | 1.00 |
| 15.64      |     |     | O   |    |        |       |        |      |
| ATOM       | 373 | CB  | CYS | 29 | 19.568 | 1.751 | 22.729 | 1.00 |
| 9.52       |     |     | C   |    |        |       |        |      |
| ATOM       | 374 | SG  | CYS | 29 | 18.222 | 0.949 | 21.846 | 1.00 |
| 10.40      |     |     | S   |    |        |       |        |      |
| ATOM       | 375 | HN  | CYS | 29 | 20.543 | 4.310 | 24.243 | 1.00 |
| 11.10      |     |     | H   |    |        |       |        |      |
| ATOM       | 376 | HA  | CYS | 29 | 18.349 | 3.517 | 22.611 | 1.00 |
| 11.08      |     |     | H   |    |        |       |        |      |
| ATOM       | 377 | HB1 | CYS | 29 | 19.877 | 1.107 | 23.542 | 1.00 |
| 9.33       |     |     | H   |    |        |       |        |      |
| ATOM       | 378 | HB2 | CYS | 29 | 20.395 | 1.900 | 22.055 | 1.00 |
| 10.78      |     |     | H   |    |        |       |        |      |
| ATOM       | 379 | N   | GLU | 30 | 17.233 | 3.370 | 24.819 | 1.00 |
| 13.52      |     |     | N   |    |        |       |        |      |
| ATOM       | 380 | CA  | GLU | 30 | 16.552 | 3.268 | 26.105 | 1.00 |
| 17.41      |     |     | C   |    |        |       |        |      |
| ATOM       | 381 | C   | GLU | 30 | 15.908 | 1.899 | 26.284 | 1.00 |
| 10.81      |     |     | C   |    |        |       |        |      |
| ATOM       | 382 | O   | GLU | 30 | 15.670 | 1.181 | 25.315 | 1.00 |
| 23.22      |     |     | O   |    |        |       |        |      |
| ATOM       | 383 | CB  | GLU | 30 | 15.491 | 4.362 | 26.210 | 1.00 |
| 37.83      |     |     | C   |    |        |       |        |      |
| ATOM       | 384 | CG  | GLU | 30 | 16.178 | 5.725 | 26.180 |      |
| 1.00108.13 |     |     | C   |    |        |       |        |      |

|            |     |     |     |     |        |        |        |      |
|------------|-----|-----|-----|-----|--------|--------|--------|------|
| ATOM       | 385 | CD  | GLU | 30  | 16.947 | 5.950  | 27.475 |      |
| 1.00240.52 |     |     |     | C   |        |        |        |      |
| ATOM       | 386 | OE1 | GLU | 30  | 17.767 | 6.853  | 27.506 |      |
| 1.00422.56 |     |     |     | O   |        |        |        |      |
| ATOM       | 387 | OE2 | GLU | 30  | 16.705 | 5.216  | 28.420 |      |
| 1.00410.81 |     |     |     | O1- |        |        |        |      |
| ATOM       | 388 | HN  | GLU | 30  | 16.765 | 3.777  | 24.055 | 1.00 |
| 15.61      |     |     | H   |     |        |        |        |      |
| ATOM       | 389 | HA  | GLU | 30  | 17.273 | 3.416  | 26.896 | 1.00 |
| 24.60      |     |     | H   |     |        |        |        |      |
| ATOM       | 390 | HB1 | GLU | 30  | 14.949 | 4.253  | 27.135 | 1.00 |
| 72.67      |     |     | H   |     |        |        |        |      |
| ATOM       | 391 | HB2 | GLU | 30  | 14.809 | 4.284  | 25.376 | 1.00 |
| 56.47      |     |     | H   |     |        |        |        |      |
| ATOM       | 392 | HG1 | GLU | 30  | 15.436 | 6.501  | 26.064 |      |
| 1.00196.66 |     |     |     | H   |        |        |        |      |
| ATOM       | 393 | HG2 | GLU | 30  | 16.864 | 5.758  | 25.346 |      |
| 1.00140.67 |     |     |     | H   |        |        |        |      |
| ATOM       | 394 | N   | LYS | 31  | 15.631 | 1.541  | 27.540 | 1.00 |
| 11.96      |     |     | N   |     |        |        |        |      |
| ATOM       | 395 | CA  | LYS | 31  | 15.010 | 0.254  | 27.859 | 1.00 |
| 11.40      |     |     | C   |     |        |        |        |      |
| ATOM       | 396 | C   | LYS | 31  | 13.736 | 0.471  | 28.668 | 1.00 |
| 10.99      |     |     | C   |     |        |        |        |      |
| ATOM       | 397 | O   | LYS | 31  | 13.671 | 1.365  | 29.512 | 1.00 |
| 12.86      |     |     | O   |     |        |        |        |      |
| ATOM       | 398 | CB  | LYS | 31  | 15.980 | -0.604 | 28.672 | 1.00 |
| 21.40      |     |     | C   |     |        |        |        |      |
| ATOM       | 399 | CG  | LYS | 31  | 17.225 | -0.905 | 27.834 | 1.00 |
| 57.81      |     |     | C   |     |        |        |        |      |
| ATOM       | 400 | CD  | LYS | 31  | 18.186 | -1.779 | 28.642 |      |
| 1.00115.52 |     |     |     | C   |        |        |        |      |
| ATOM       | 401 | CE  | LYS | 31  | 19.423 | -2.092 | 27.799 |      |
| 1.00250.23 |     |     |     | C   |        |        |        |      |
| ATOM       | 402 | NZ  | LYS | 31  | 20.149 | -0.828 | 27.492 |      |
| 1.00462.10 |     |     |     | N1+ |        |        |        |      |
| ATOM       | 403 | HN  | LYS | 31  | 15.848 | 2.160  | 28.268 | 1.00 |
| 26.13      |     |     | H   |     |        |        |        |      |
| ATOM       | 404 | HA  | LYS | 31  | 14.763 | -0.270 | 26.948 | 1.00 |
| 13.87      |     |     | H   |     |        |        |        |      |
| ATOM       | 405 | HB1 | LYS | 31  | 15.500 | -1.532 | 28.943 | 1.00 |
| 37.63      |     |     | H   |     |        |        |        |      |
| ATOM       | 406 | HB2 | LYS | 31  | 16.266 | -0.072 | 29.566 | 1.00 |
| 47.19      |     |     | H   |     |        |        |        |      |
| ATOM       | 407 | HG1 | LYS | 31  | 17.716 | 0.022  | 27.575 |      |
| 1.00126.32 |     |     |     | H   |        |        |        |      |
| ATOM       | 408 | HG2 | LYS | 31  | 16.935 | -1.424 | 26.932 |      |
| 1.00114.19 |     |     |     | H   |        |        |        |      |
| ATOM       | 409 | HD1 | LYS | 31  | 17.693 | -2.700 | 28.911 |      |
| 1.00198.45 |     |     |     | H   |        |        |        |      |
| ATOM       | 410 | HD2 | LYS | 31  | 18.484 | -1.254 | 29.538 |      |
| 1.00200.14 |     |     |     | H   |        |        |        |      |



|      |         |      |     |    |        |        |        |      |
|------|---------|------|-----|----|--------|--------|--------|------|
| ATOM | 411     | HE1  | LYS | 31 | 19.120 | -2.567 | 26.878 |      |
|      | 1.00374 |      |     |    |        |        |        | H    |
| ATOM | 412     | HE2  | LYS | 31 | 20.073 | -2.758 | 28.347 |      |
|      | 1.00403 |      |     |    |        |        |        | H    |
| ATOM | 413     | HZ1  | LYS | 31 | 20.251 | -0.267 | 28.362 |      |
|      | 1.00627 |      |     |    |        |        |        | H    |
| ATOM | 414     | HZ2  | LYS | 31 | 19.610 | -0.283 | 26.788 |      |
|      | 1.00622 |      |     |    |        |        |        | H    |
| ATOM | 415     | HZ3  | LYS | 31 | 21.090 | -1.051 | 27.114 |      |
|      | 1.00619 |      |     |    |        |        |        | H    |
| ATOM | 416     | N    | THR | 32 | 12.726 | -0.353 | 28.407 | 1.00 |
|      | 15.51   |      | N   |    |        |        |        |      |
| ATOM | 417     | CA   | THR | 32 | 11.456 | -0.242 | 29.124 | 1.00 |
|      | 22.44   |      | C   |    |        |        |        |      |
| ATOM | 418     | C    | THR | 32 | 11.522 | -1.006 | 30.442 | 1.00 |
|      | 26.60   |      | C   |    |        |        |        |      |
| ATOM | 419     | O    | THR | 32 | 11.767 | -2.212 | 30.463 | 1.00 |
|      | 57.43   |      | O   |    |        |        |        |      |
| ATOM | 420     | CB   | THR | 32 | 10.317 | -0.799 | 28.265 | 1.00 |
|      | 56.28   |      | C   |    |        |        |        |      |
| ATOM | 421     | CG2  | THR | 32 | 9.002  | -0.715 | 29.040 |      |
|      | 1.00102 |      |     |    |        |        |        | C    |
| ATOM | 422     | OG1  | THR | 32 | 10.213 | -0.041 | 27.068 |      |
|      | 1.00111 |      |     |    |        |        |        | O    |
| ATOM | 423     | HN   | THR | 32 | 12.836 | -1.049 | 27.726 | 1.00 |
|      | 18.79   |      | H   |    |        |        |        |      |
| ATOM | 424     | HA   | THR | 32 | 11.257 | 0.800  | 29.332 | 1.00 |
|      | 19.67   |      | H   |    |        |        |        |      |
| ATOM | 425     | HB   | THR | 32 | 10.520 | -1.828 | 28.022 | 1.00 |
|      | 84.25   |      | H   |    |        |        |        |      |
| ATOM | 426     | HG1  | THR | 32 | 9.988  | -0.644 | 26.355 |      |
|      | 1.00205 |      |     |    |        |        |        | H    |
| ATOM | 427     | HG21 | THR | 32 | 9.016  | -1.423 | 29.856 |      |
|      | 1.00220 |      |     |    |        |        |        | H    |
| ATOM | 428     | HG22 | THR | 32 | 8.180  | -0.947 | 28.381 |      |
|      | 1.00174 |      |     |    |        |        |        | H    |
| ATOM | 429     | HG23 | THR | 32 | 8.878  | 0.284  | 29.433 |      |
|      | 1.00217 |      |     |    |        |        |        | H    |
| ATOM | 430     | N    | THR | 33 | 11.296 | -0.292 | 31.541 | 1.00 |
|      | 22.47   |      | N   |    |        |        |        |      |
| ATOM | 431     | CA   | THR | 33 | 11.327 | -0.903 | 32.867 | 1.00 |
|      | 41.60   |      | C   |    |        |        |        |      |
| ATOM | 432     | C    | THR | 33 | 10.458 | -0.134 | 33.825 | 1.00 |
|      | 38.03   |      | C   |    |        |        |        |      |
| ATOM | 433     | O    | THR | 33 | 10.912 | 0.785  | 34.505 | 1.00 |
|      | 52.73   |      | O   |    |        |        |        |      |
| ATOM | 434     | CB   | THR | 33 | 12.763 | -0.960 | 33.398 | 1.00 |
|      | 63.25   |      | C   |    |        |        |        |      |
| ATOM | 435     | CG2  | THR | 33 | 13.581 | -1.956 | 32.574 |      |
|      | 1.00121 |      |     |    |        |        |        | C    |
| ATOM | 436     | OG1  | THR | 33 | 13.351 | 0.329  | 33.305 | 1.00 |
|      | 96.20   |      | O   |    |        |        |        |      |

|            |     |      |     |    |        |        |        |      |
|------------|-----|------|-----|----|--------|--------|--------|------|
| ATOM       | 437 | HN   | THR | 33 | 11.106 | 0.666  | 31.460 | 1.00 |
| 23.82      |     |      | H   |    |        |        |        |      |
| ATOM       | 438 | HA   | THR | 33 | 10.930 | -1.899 | 32.814 | 1.00 |
| 67.12      |     |      | H   |    |        |        |        |      |
| ATOM       | 439 | HB   | THR | 33 | 12.751 | -1.277 | 34.430 |      |
| 1.00107.59 |     |      | H   |    |        |        |        |      |
| ATOM       | 440 | HG1  | THR | 33 | 13.741 | 0.415  | 32.432 |      |
| 1.00176.27 |     |      | H   |    |        |        |        |      |
| ATOM       | 441 | HG21 | THR | 33 | 13.020 | -2.870 | 32.450 |      |
| 1.00255.23 |     |      | H   |    |        |        |        |      |
| ATOM       | 442 | HG22 | THR | 33 | 14.507 | -2.171 | 33.087 |      |
| 1.00245.37 |     |      | H   |    |        |        |        |      |
| ATOM       | 443 | HG23 | THR | 33 | 13.796 | -1.531 | 31.606 |      |
| 1.00185.78 |     |      | H   |    |        |        |        |      |
| ATOM       | 444 | N    | GLY | 34 | 9.201  | -0.539 | 33.885 | 1.00 |
| 40.93      |     |      | N   |    |        |        |        |      |
| ATOM       | 445 | CA   | GLY | 34 | 8.268  | 0.097  | 34.779 | 1.00 |
| 45.59      |     |      | C   |    |        |        |        |      |
| ATOM       | 446 | C    | GLY | 34 | 7.885  | 1.482  | 34.272 | 1.00 |
| 40.97      |     |      | C   |    |        |        |        |      |
| ATOM       | 447 | O    | GLY | 34 | 6.722  | 1.883  | 34.343 | 1.00 |
| 82.17      |     |      | O   |    |        |        |        |      |
| ATOM       | 448 | HN   | GLY | 34 | 8.904  | -1.289 | 33.328 | 1.00 |
| 54.00      |     |      | H   |    |        |        |        |      |
| ATOM       | 449 | HA1  | GLY | 34 | 8.741  | 0.184  | 35.736 | 1.00 |
| 54.41      |     |      | H   |    |        |        |        |      |
| ATOM       | 450 | HA2  | GLY | 34 | 7.381  | -0.514 | 34.868 | 1.00 |
| 62.09      |     |      | H   |    |        |        |        |      |
| ATOM       | 451 | N    | ASN | 35 | 8.873  | 2.209  | 33.751 | 1.00 |
| 32.51      |     |      | N   |    |        |        |        |      |
| ATOM       | 452 | CA   | ASN | 35 | 8.644  | 3.556  | 33.218 | 1.00 |
| 33.20      |     |      | C   |    |        |        |        |      |
| ATOM       | 453 | C    | ASN | 35 | 9.343  | 3.716  | 31.873 | 1.00 |
| 23.17      |     |      | C   |    |        |        |        |      |
| ATOM       | 454 | O    | ASN | 35 | 10.465 | 3.246  | 31.685 | 1.00 |
| 27.01      |     |      | O   |    |        |        |        |      |
| ATOM       | 455 | CB   | ASN | 35 | 9.175  | 4.602  | 34.198 | 1.00 |
| 54.51      |     |      | C   |    |        |        |        |      |
| ATOM       | 456 | CG   | ASN | 35 | 8.468  | 4.467  | 35.542 | 1.00 |
| 80.73      |     |      | C   |    |        |        |        |      |
| ATOM       | 457 | ND2  | ASN | 35 | 9.167  | 4.498  | 36.643 |      |
| 1.00220.46 |     |      | N   |    |        |        |        |      |
| ATOM       | 458 | OD1  | ASN | 35 | 7.245  | 4.327  | 35.589 |      |
| 1.00117.80 |     |      | O   |    |        |        |        |      |
| ATOM       | 459 | HN   | ASN | 35 | 9.778  | 1.831  | 33.718 | 1.00 |
| 51.15      |     |      | H   |    |        |        |        |      |
| ATOM       | 460 | HA   | ASN | 35 | 7.583  | 3.715  | 33.079 | 1.00 |
| 47.21      |     |      | H   |    |        |        |        |      |
| ATOM       | 461 | HB1  | ASN | 35 | 8.995  | 5.589  | 33.797 | 1.00 |
| 68.31      |     |      | H   |    |        |        |        |      |
| ATOM       | 462 | HB2  | ASN | 35 | 10.238 | 4.459  | 34.334 | 1.00 |
| 57.75      |     |      | H   |    |        |        |        |      |

|            |     |      |     |    |        |       |        |      |
|------------|-----|------|-----|----|--------|-------|--------|------|
| ATOM       | 463 | HD21 | ASN | 35 | 10.139 | 4.608 | 36.602 |      |
| 1.00405.39 |     |      |     |    |        |       |        | H    |
| ATOM       | 464 | HD22 | ASN | 35 | 8.719  | 4.412 | 37.511 |      |
| 1.00245.64 |     |      |     |    |        |       |        | H    |
| ATOM       | 465 | N    | PHE | 36 | 8.671  | 4.377 | 30.937 | 1.00 |
| 35.72      |     |      | N   |    |        |       |        |      |
| ATOM       | 466 | CA   | PHE | 36 | 9.222  | 4.592 | 29.610 | 1.00 |
| 33.41      |     |      | C   |    |        |       |        |      |
| ATOM       | 467 | C    | PHE | 36 | 10.094 | 5.843 | 29.577 | 1.00 |
| 28.51      |     |      | C   |    |        |       |        |      |
| ATOM       | 468 | O    | PHE | 36 | 9.864  | 6.792 | 30.327 | 1.00 |
| 45.23      |     |      | O   |    |        |       |        |      |
| ATOM       | 469 | CB   | PHE | 36 | 8.075  | 4.742 | 28.617 | 1.00 |
| 67.53      |     |      | C   |    |        |       |        |      |
| ATOM       | 470 | CG   | PHE | 36 | 7.301  | 3.447 | 28.550 | 1.00 |
| 86.71      |     |      | C   |    |        |       |        |      |
| ATOM       | 471 | CD1  | PHE | 36 | 6.227  | 3.234 | 29.422 |      |
| 1.00106.51 |     |      |     |    |        |       |        | C    |
| ATOM       | 472 | CD2  | PHE | 36 | 7.650  | 2.464 | 27.615 | 1.00 |
| 99.48      |     |      | C   |    |        |       |        |      |
| ATOM       | 473 | CE1  | PHE | 36 | 5.503  | 2.037 | 29.361 |      |
| 1.00134.48 |     |      |     |    |        |       |        | C    |
| ATOM       | 474 | CE2  | PHE | 36 | 6.926  | 1.268 | 27.555 |      |
| 1.00134.27 |     |      |     |    |        |       |        | C    |
| ATOM       | 475 | CZ   | PHE | 36 | 5.852  | 1.054 | 28.428 |      |
| 1.00149.48 |     |      |     |    |        |       |        | C    |
| ATOM       | 476 | HN   | PHE | 36 | 7.779  | 4.723 | 31.139 | 1.00 |
| 62.87      |     |      | H   |    |        |       |        |      |
| ATOM       | 477 | HA   | PHE | 36 | 9.819  | 3.737 | 29.325 | 1.00 |
| 28.53      |     |      | H   |    |        |       |        |      |
| ATOM       | 478 | HB1  | PHE | 36 | 8.470  | 4.975 | 27.646 | 1.00 |
| 73.56      |     |      | H   |    |        |       |        |      |
| ATOM       | 479 | HB2  | PHE | 36 | 7.420  | 5.538 | 28.941 | 1.00 |
| 88.42      |     |      | H   |    |        |       |        |      |
| ATOM       | 480 | HD1  | PHE | 36 | 5.959  | 3.992 | 30.144 |      |
| 1.00110.20 |     |      |     |    |        |       |        | H    |
| ATOM       | 481 | HD2  | PHE | 36 | 8.480  | 2.627 | 26.943 | 1.00 |
| 93.07      |     |      | H   |    |        |       |        |      |
| ATOM       | 482 | HE1  | PHE | 36 | 4.675  | 1.872 | 30.034 |      |
| 1.00155.06 |     |      |     |    |        |       |        | H    |
| ATOM       | 483 | HE2  | PHE | 36 | 7.195  | 0.510 | 26.834 |      |
| 1.00159.46 |     |      |     |    |        |       |        | H    |
| ATOM       | 484 | HZ   | PHE | 36 | 5.294  | 0.132 | 28.380 |      |
| 1.00183.25 |     |      |     |    |        |       |        | H    |
| ATOM       | 485 | N    | THR | 37 | 11.094 | 5.839 | 28.699 | 1.00 |
| 20.06      |     |      | N   |    |        |       |        |      |
| ATOM       | 486 | CA   | THR | 37 | 11.997 | 6.975 | 28.562 | 1.00 |
| 27.18      |     |      | C   |    |        |       |        |      |
| ATOM       | 487 | C    | THR | 37 | 12.599 | 7.001 | 27.161 | 1.00 |
| 41.87      |     |      | C   |    |        |       |        |      |
| ATOM       | 488 | O    | THR | 37 | 13.225 | 6.036 | 26.723 |      |
| 1.00169.86 |     |      |     |    |        |       |        | O    |

|            |     |      |     |    |        |        |        |      |
|------------|-----|------|-----|----|--------|--------|--------|------|
| ATOM       | 489 | CB   | THR | 37 | 13.114 | 6.888  | 29.608 | 1.00 |
| 26.52      |     |      | C   |    |        |        |        |      |
| ATOM       | 490 | CG2  | THR | 37 | 13.516 | 5.426  | 29.820 | 1.00 |
| 75.69      |     |      | C   |    |        |        |        |      |
| ATOM       | 491 | OG1  | THR | 37 | 14.238 | 7.633  | 29.162 | 1.00 |
| 81.95      |     |      | O   |    |        |        |        |      |
| ATOM       | 492 | HN   | THR | 37 | 11.224 | 5.057  | 28.125 | 1.00 |
| 18.47      |     |      | H   |    |        |        |        |      |
| ATOM       | 493 | HA   | THR | 37 | 11.441 | 7.889  | 28.718 | 1.00 |
| 38.80      |     |      | H   |    |        |        |        |      |
| ATOM       | 494 | HB   | THR | 37 | 12.763 | 7.297  | 30.545 | 1.00 |
| 81.60      |     |      | H   |    |        |        |        |      |
| ATOM       | 495 | HG1  | THR | 37 | 14.712 | 7.949  | 29.934 |      |
| 1.00188.80 |     |      | H   |    |        |        |        |      |
| ATOM       | 496 | HG21 | THR | 37 | 12.799 | 4.948  | 30.471 |      |
| 1.00196.98 |     |      | H   |    |        |        |        |      |
| ATOM       | 497 | HG22 | THR | 37 | 14.496 | 5.384  | 30.274 |      |
| 1.00196.23 |     |      | H   |    |        |        |        |      |
| ATOM       | 498 | HG23 | THR | 37 | 13.537 | 4.914  | 28.870 |      |
| 1.00168.92 |     |      | H   |    |        |        |        |      |
| ATOM       | 499 | N    | GLU | 38 | 12.389 | 8.109  | 26.462 | 1.00 |
| 26.53      |     |      | N   |    |        |        |        |      |
| ATOM       | 500 | CA   | GLU | 38 | 12.897 | 8.266  | 25.101 | 1.00 |
| 30.29      |     |      | C   |    |        |        |        |      |
| ATOM       | 501 | C    | GLU | 38 | 14.367 | 8.680  | 25.101 | 1.00 |
| 25.39      |     |      | C   |    |        |        |        |      |
| ATOM       | 502 | O    | GLU | 38 | 14.828 | 9.379  | 26.004 | 1.00 |
| 51.60      |     |      | O   |    |        |        |        |      |
| ATOM       | 503 | CB   | GLU | 38 | 12.071 | 9.319  | 24.359 | 1.00 |
| 54.82      |     |      | C   |    |        |        |        |      |
| ATOM       | 504 | CG   | GLU | 38 | 12.527 | 9.400  | 22.900 |      |
| 1.00165.84 |     |      | C   |    |        |        |        |      |
| ATOM       | 505 | CD   | GLU | 38 | 11.654 | 10.389 | 22.135 |      |
| 1.00292.92 |     |      | C   |    |        |        |        |      |
| ATOM       | 506 | OE1  | GLU | 38 | 10.759 | 10.953 | 22.744 |      |
| 1.00414.19 |     |      | O   |    |        |        |        |      |
| ATOM       | 507 | OE2  | GLU | 38 | 11.894 | 10.569 | 20.953 |      |
| 1.00537.65 |     |      | O1- |    |        |        |        |      |
| ATOM       | 508 | HN   | GLU | 38 | 11.873 | 8.835  | 26.867 | 1.00 |
| 84.50      |     |      | H   |    |        |        |        |      |
| ATOM       | 509 | HA   | GLU | 38 | 12.801 | 7.323  | 24.581 | 1.00 |
| 32.15      |     |      | H   |    |        |        |        |      |
| ATOM       | 510 | HB1  | GLU | 38 | 12.206 | 10.279 | 24.830 |      |
| 1.00144.82 |     |      | H   |    |        |        |        |      |
| ATOM       | 511 | HB2  | GLU | 38 | 11.026 | 9.043  | 24.394 |      |
| 1.00106.49 |     |      | H   |    |        |        |        |      |
| ATOM       | 512 | HG1  | GLU | 38 | 12.447 | 8.425  | 22.444 |      |
| 1.00303.31 |     |      | H   |    |        |        |        |      |
| ATOM       | 513 | HG2  | GLU | 38 | 13.556 | 9.729  | 22.864 |      |
| 1.00323.99 |     |      | H   |    |        |        |        |      |
| ATOM       | 514 | N    | CYS | 39 | 15.092 | 8.248  | 24.071 | 1.00 |
| 15.84      |     |      | N   |    |        |        |        |      |

|            |     |     |     |    |        |        |        |      |
|------------|-----|-----|-----|----|--------|--------|--------|------|
| ATOM       | 515 | CA  | CYS | 39 | 16.513 | 8.576  | 23.934 | 1.00 |
| 14.30      |     |     | C   |    |        |        |        |      |
| ATOM       | 516 | C   | CYS | 39 | 16.758 | 10.041 | 24.324 | 1.00 |
| 22.31      |     |     | C   |    |        |        |        |      |
| ATOM       | 517 | O   | CYS | 39 | 15.818 | 10.830 | 24.412 | 1.00 |
| 32.92      |     |     | O   |    |        |        |        |      |
| ATOM       | 518 | CB  | CYS | 39 | 16.982 | 8.313  | 22.476 | 1.00 |
| 18.08      |     |     | C   |    |        |        |        |      |
| ATOM       | 519 | SG  | CYS | 39 | 15.575 | 7.826  | 21.450 | 1.00 |
| 17.41      |     |     | S   |    |        |        |        |      |
| ATOM       | 520 | HN  | CYS | 39 | 14.661 | 7.700  | 23.383 | 1.00 |
| 24.87      |     |     | H   |    |        |        |        |      |
| ATOM       | 521 | HA  | CYS | 39 | 17.076 | 7.944  | 24.604 | 1.00 |
| 14.60      |     |     | H   |    |        |        |        |      |
| ATOM       | 522 | HB1 | CYS | 39 | 17.707 | 7.511  | 22.467 | 1.00 |
| 27.71      |     |     | H   |    |        |        |        |      |
| ATOM       | 523 | HB2 | CYS | 39 | 17.430 | 9.201  | 22.055 | 1.00 |
| 34.91      |     |     | H   |    |        |        |        |      |
| ATOM       | 524 | N   | PRO | 40 | 17.993 | 10.407 | 24.558 | 1.00 |
| 27.27      |     |     | N   |    |        |        |        |      |
| ATOM       | 525 | CA  | PRO | 40 | 18.353 | 11.800 | 24.947 | 1.00 |
| 47.66      |     |     | C   |    |        |        |        |      |
| ATOM       | 526 | C   | PRO | 40 | 18.310 | 12.751 | 23.753 | 1.00 |
| 71.54      |     |     | C   |    |        |        |        |      |
| ATOM       | 527 | O   | PRO | 40 | 18.683 | 12.387 | 22.640 | 1.00 |
| 87.70      |     |     | O   |    |        |        |        |      |
| ATOM       | 528 | CB  | PRO | 40 | 19.777 | 11.653 | 25.499 | 1.00 |
| 53.85      |     |     | C   |    |        |        |        |      |
| ATOM       | 529 | CG  | PRO | 40 | 20.352 | 10.500 | 24.743 | 1.00 |
| 46.04      |     |     | C   |    |        |        |        |      |
| ATOM       | 530 | CD  | PRO | 40 | 19.184 | 9.543  | 24.472 | 1.00 |
| 25.70      |     |     | C   |    |        |        |        |      |
| ATOM       | 531 | HA  | PRO | 40 | 17.697 | 12.151 | 25.727 | 1.00 |
| 58.04      |     |     | H   |    |        |        |        |      |
| ATOM       | 532 | HB1 | PRO | 40 | 19.748 | 11.428 | 26.555 | 1.00 |
| 67.93      |     |     | H   |    |        |        |        |      |
| ATOM       | 533 | HB2 | PRO | 40 | 20.349 | 12.556 | 25.320 | 1.00 |
| 70.99      |     |     | H   |    |        |        |        |      |
| ATOM       | 534 | HG1 | PRO | 40 | 21.106 | 10.000 | 25.334 | 1.00 |
| 65.91      |     |     | H   |    |        |        |        |      |
| ATOM       | 535 | HG2 | PRO | 40 | 20.780 | 10.847 | 23.809 | 1.00 |
| 54.99      |     |     | H   |    |        |        |        |      |
| ATOM       | 536 | HD1 | PRO | 40 | 19.142 | 8.771  | 25.223 | 1.00 |
| 24.22      |     |     | H   |    |        |        |        |      |
| ATOM       | 537 | HD2 | PRO | 40 | 19.269 | 9.115  | 23.485 | 1.00 |
| 26.94      |     |     | H   |    |        |        |        |      |
| ATOM       | 538 | N   | GLY | 41 | 17.857 | 13.972 | 24.002 |      |
| 1.00105.24 |     |     |     |    |        |        |        | N    |
| ATOM       | 539 | CA  | GLY | 41 | 17.771 | 14.976 | 22.950 |      |
| 1.00147.55 |     |     |     |    |        |        |        | C    |
| ATOM       | 540 | C   | GLY | 41 | 19.154 | 15.306 | 22.400 |      |
| 1.00161.74 |     |     |     |    |        |        |        | C    |

|            |     |      |     |    |        |        |        |
|------------|-----|------|-----|----|--------|--------|--------|
| ATOM       | 541 | O    | GLY | 41 | 19.331 | 15.486 | 21.196 |
| 1.00244.37 |     |      | O   |    |        |        |        |
| ATOM       | 542 | HN   | GLY | 41 | 17.578 | 14.200 | 24.910 |
| 1.00121.79 |     |      | H   |    |        |        |        |
| ATOM       | 543 | HA1  | GLY | 41 | 17.326 | 15.875 | 23.350 |
| 1.00184.40 |     |      | H   |    |        |        |        |
| ATOM       | 544 | HA2  | GLY | 41 | 17.153 | 14.598 | 22.150 |
| 1.00157.34 |     |      | H   |    |        |        |        |
| ATOM       | 545 | N    | LEU | 42 | 20.131 | 15.385 | 23.300 |
| 1.00162.48 |     |      | N   |    |        |        |        |
| ATOM       | 546 | CA   | LEU | 42 | 21.513 | 15.696 | 22.919 |
| 1.00191.48 |     |      | C   |    |        |        |        |
| ATOM       | 547 | C    | LEU | 42 | 22.426 | 14.512 | 23.225 |
| 1.00166.66 |     |      | C   |    |        |        |        |
| ATOM       | 548 | O    | LEU | 42 | 22.195 | 13.767 | 24.178 |
| 1.00251.38 |     |      | O   |    |        |        |        |
| ATOM       | 549 | CB   | LEU | 42 | 22.001 | 16.925 | 23.693 |
| 1.00307.99 |     |      | C   |    |        |        |        |
| ATOM       | 550 | CG   | LEU | 42 | 21.051 | 18.105 | 23.454 |
| 1.00452.28 |     |      | C   |    |        |        |        |
| ATOM       | 551 | CD1  | LEU | 42 | 21.521 | 19.304 | 24.284 |
| 1.00681.24 |     |      | C   |    |        |        |        |
| ATOM       | 552 | CD2  | LEU | 42 | 21.042 | 18.482 | 21.963 |
| 1.00527.46 |     |      | C   |    |        |        |        |
| ATOM       | 553 | HN   | LEU | 42 | 19.920 | 15.232 | 24.243 |
| 1.00195.47 |     |      | H   |    |        |        |        |
| ATOM       | 554 | HA   | LEU | 42 | 21.564 | 15.907 | 21.861 |
| 1.00229.77 |     |      | H   |    |        |        |        |
| ATOM       | 555 | HB1  | LEU | 42 | 22.991 | 17.190 | 23.355 |
| 1.00342.49 |     |      | H   |    |        |        |        |
| ATOM       | 556 | HB2  | LEU | 42 | 22.031 | 16.695 | 24.748 |
| 1.00335.33 |     |      | H   |    |        |        |        |
| ATOM       | 557 | HG   | LEU | 42 | 20.053 | 17.827 | 23.763 |
| 1.00427.79 |     |      | H   |    |        |        |        |
| ATOM       | 558 | HD11 | LEU | 42 | 21.408 | 19.080 | 25.334 |
| 1.00909.71 |     |      | H   |    |        |        |        |
| ATOM       | 559 | HD12 | LEU | 42 | 20.926 | 20.169 | 24.034 |
| 1.00706.80 |     |      | H   |    |        |        |        |
| ATOM       | 560 | HD13 | LEU | 42 | 22.560 | 19.506 | 24.068 |
| 1.00858.82 |     |      | H   |    |        |        |        |
| ATOM       | 561 | HD21 | LEU | 42 | 20.361 | 17.833 | 21.432 |
| 1.00631.69 |     |      | H   |    |        |        |        |
| ATOM       | 562 | HD22 | LEU | 42 | 22.035 | 18.375 | 21.552 |
| 1.00628.06 |     |      | H   |    |        |        |        |
| ATOM       | 563 | HD23 | LEU | 42 | 20.716 | 19.507 | 21.848 |
| 1.00656.75 |     |      | H   |    |        |        |        |
| ATOM       | 564 | N    | THR | 43 | 23.462 | 14.342 | 22.409 |
| 1.00178.52 |     |      | N   |    |        |        |        |
| ATOM       | 565 | CA   | THR | 43 | 24.399 | 13.243 | 22.602 |
| 1.00240.84 |     |      | C   |    |        |        |        |
| ATOM       | 566 | C    | THR | 43 | 25.210 | 13.452 | 23.887 |
| 1.00372.31 |     |      | C   |    |        |        |        |

|            |     |      |     |    |        |        |        |
|------------|-----|------|-----|----|--------|--------|--------|
| ATOM       | 567 | O    | THR | 43 | 25.466 | 14.592 | 24.277 |
| 1.00500.13 |     |      | O   |    |        |        |        |
| ATOM       | 568 | CB   | THR | 43 | 25.345 | 13.168 | 21.398 |
| 1.00354.13 |     |      | C   |    |        |        |        |
| ATOM       | 569 | CG2  | THR | 43 | 24.525 | 13.013 | 20.116 |
| 1.00463.04 |     |      | C   |    |        |        |        |
| ATOM       | 570 | OG1  | THR | 43 | 26.115 | 14.360 | 21.329 |
| 1.00508.50 |     |      | O   |    |        |        |        |
| ATOM       | 571 | HN   | THR | 43 | 23.595 | 14.966 | 21.665 |
| 1.00229.59 |     |      | H   |    |        |        |        |
| ATOM       | 572 | HA   | THR | 43 | 23.842 | 12.323 | 22.668 |
| 1.00249.90 |     |      | H   |    |        |        |        |
| ATOM       | 573 | HB   | THR | 43 | 26.004 | 12.323 | 21.501 |
| 1.00481.58 |     |      | H   |    |        |        |        |
| ATOM       | 574 | HG1  | THR | 43 | 25.774 | 14.972 | 21.987 |
| 1.00624.31 |     |      | H   |    |        |        |        |
| ATOM       | 575 | HG21 | THR | 43 | 23.763 | 12.261 | 20.265 |
| 1.00650.95 |     |      | H   |    |        |        |        |
| ATOM       | 576 | HG22 | THR | 43 | 25.174 | 12.711 | 19.307 |
| 1.00580.73 |     |      | H   |    |        |        |        |
| ATOM       | 577 | HG23 | THR | 43 | 24.057 | 13.955 | 19.872 |
| 1.00571.99 |     |      | H   |    |        |        |        |
| ATOM       | 578 | N    | PRO | 44 | 25.627 | 12.393 | 24.548 |
| 1.00488.39 |     |      | N   |    |        |        |        |
| ATOM       | 579 | CA   | PRO | 44 | 26.429 | 12.503 | 25.804 |
| 1.00760.13 |     |      | C   |    |        |        |        |
| ATOM       | 580 | C    | PRO | 44 | 27.867 | 12.935 | 25.522 |
| 1.00735.36 |     |      | C   |    |        |        |        |
| ATOM       | 581 | O    | PRO | 44 | 28.702 | 12.981 | 26.425 |
| 1.00999.99 |     |      | O   |    |        |        |        |
| ATOM       | 582 | CB   | PRO | 44 | 26.371 | 11.087 | 26.390 |
| 1.00999.99 |     |      | C   |    |        |        |        |
| ATOM       | 583 | CG   | PRO | 44 | 26.223 | 10.194 | 25.203 |
| 1.00856.94 |     |      | C   |    |        |        |        |
| ATOM       | 584 | CD   | PRO | 44 | 25.385 | 10.979 | 24.188 |
| 1.00548.09 |     |      | C   |    |        |        |        |
| ATOM       | 585 | HA   | PRO | 44 | 25.962 | 13.196 | 26.485 |
| 1.00939.00 |     |      | H   |    |        |        |        |
| ATOM       | 586 | HB1  | PRO | 44 | 25.516 | 10.983 | 27.042 |
| 1.00999.99 |     |      | H   |    |        |        |        |
| ATOM       | 587 | HB2  | PRO | 44 | 27.283 | 10.858 | 26.931 |
| 1.00999.99 |     |      | H   |    |        |        |        |
| ATOM       | 588 | HG1  | PRO | 44 | 25.707 | 9.284  | 25.476 |
| 1.00999.99 |     |      | H   |    |        |        |        |
| ATOM       | 589 | HG2  | PRO | 44 | 27.196 | 9.960  | 24.788 |
| 1.00853.53 |     |      | H   |    |        |        |        |
| ATOM       | 590 | HD1  | PRO | 44 | 24.337 | 10.742 | 24.296 |
| 1.00602.45 |     |      | H   |    |        |        |        |
| ATOM       | 591 | HD2  | PRO | 44 | 25.723 | 10.773 | 23.183 |
| 1.00463.32 |     |      | H   |    |        |        |        |
| ATOM       | 592 | N    | ILE | 45 | 28.148 | 13.246 | 24.260 |
| 1.00518.33 |     |      | N   |    |        |        |        |

|            |     |      |     |    |        |        |        |
|------------|-----|------|-----|----|--------|--------|--------|
| ATOM       | 593 | CA   | ILE | 45 | 29.487 | 13.665 | 23.865 |
| 1.00582.79 |     |      | C   |    |        |        |        |
| ATOM       | 594 | C    | ILE | 45 | 29.892 | 14.923 | 24.626 |
| 1.00795.93 |     |      | C   |    |        |        |        |
| ATOM       | 595 | O    | ILE | 45 | 31.010 | 15.024 | 25.130 |
| 1.00898.75 |     |      | O   |    |        |        |        |
| ATOM       | 596 | CB   | ILE | 45 | 29.520 | 13.940 | 22.359 |
| 1.00474.41 |     |      | C   |    |        |        |        |
| ATOM       | 597 | CG1  | ILE | 45 | 29.322 | 12.627 | 21.598 |
| 1.00516.90 |     |      | C   |    |        |        |        |
| ATOM       | 598 | CG2  | ILE | 45 | 30.872 | 14.546 | 21.972 |
| 1.00760.75 |     |      | C   |    |        |        |        |
| ATOM       | 599 | CD1  | ILE | 45 | 29.044 | 12.925 | 20.122 |
| 1.00566.81 |     |      | C   |    |        |        |        |
| ATOM       | 600 | HN   | ILE | 45 | 27.442 | 13.186 | 23.581 |
| 1.00395.72 |     |      | H   |    |        |        |        |
| ATOM       | 601 | HA   | ILE | 45 | 30.181 | 12.877 | 24.093 |
| 1.00711.06 |     |      | H   |    |        |        |        |
| ATOM       | 602 | HB   | ILE | 45 | 28.729 | 14.631 | 22.103 |
| 1.00477.81 |     |      | H   |    |        |        |        |
| ATOM       | 603 | HG11 | ILE | 45 | 28.486 | 12.089 | 22.020 |
| 1.00624.28 |     |      | H   |    |        |        |        |
| ATOM       | 604 | HG12 | ILE | 45 | 30.216 | 12.025 | 21.681 |
| 1.00744.84 |     |      | H   |    |        |        |        |
| ATOM       | 605 | HG21 | ILE | 45 | 30.915 | 15.574 | 22.301 |
| 1.00920.57 |     |      | H   |    |        |        |        |
| ATOM       | 606 | HG22 | ILE | 45 | 30.993 | 14.507 | 20.899 |
| 1.00999.99 |     |      | H   |    |        |        |        |
| ATOM       | 607 | HG23 | ILE | 45 | 31.666 | 13.986 | 22.445 |
| 1.00865.46 |     |      | H   |    |        |        |        |
| ATOM       | 608 | HD11 | ILE | 45 | 28.764 | 12.012 | 19.617 |
| 1.00658.89 |     |      | H   |    |        |        |        |
| ATOM       | 609 | HD12 | ILE | 45 | 29.932 | 13.333 | 19.665 |
| 1.00734.30 |     |      | H   |    |        |        |        |
| ATOM       | 610 | HD13 | ILE | 45 | 28.238 | 13.640 | 20.044 |
| 1.00675.84 |     |      | H   |    |        |        |        |
| ATOM       | 611 | N    | ALA | 46 | 28.976 | 15.875 | 24.699 |
| 1.00999.99 |     |      | N   |    |        |        |        |
| ATOM       | 612 | CA   | ALA | 46 | 29.241 | 17.127 | 25.399 |
| 1.00999.99 |     |      | C   |    |        |        |        |
| ATOM       | 613 | C    | ALA | 46 | 30.530 | 17.763 | 24.889 |
| 1.00999.99 |     |      | C   |    |        |        |        |
| ATOM       | 614 | CB   | ALA | 46 | 29.358 | 16.869 | 26.902 |
| 1.00999.99 |     |      | C   |    |        |        |        |
| ATOM       | 615 | OT1  | ALA | 46 | 31.549 | 17.595 | 25.538 |
| 1.00999.99 |     |      | O   |    |        |        |        |
| ATOM       | 616 | OT2  | ALA | 46 | 30.479 | 18.409 | 23.855 |
| 1.00999.99 |     |      | O   |    |        |        |        |
| ATOM       | 617 | HN   | ALA | 46 | 28.104 | 15.733 | 24.276 |
| 1.00999.99 |     |      | H   |    |        |        |        |
| ATOM       | 618 | HA   | ALA | 46 | 28.422 | 17.807 | 25.224 |
| 1.00999.99 |     |      | H   |    |        |        |        |



|        |            |     |     |    |        |        |        |
|--------|------------|-----|-----|----|--------|--------|--------|
| ATOM   | 619        | HB1 | ALA | 46 | 28.444 | 16.424 | 27.263 |
|        | 1.00999.99 |     |     | H  |        |        |        |
| ATOM   | 620        | HB2 | ALA | 46 | 29.530 | 17.805 | 27.416 |
|        | 1.00999.99 |     |     | H  |        |        |        |
| ATOM   | 621        | HB3 | ALA | 46 | 30.184 | 16.200 | 27.090 |
|        | 1.00999.99 |     |     | H  |        |        |        |
| ENDMDL |            |     |     |    |        |        |        |
| TER    |            |     |     |    |        |        |        |
| MODEL  | 16         |     |     |    |        |        |        |
| ATOM   | 1          | N   | GLY | 1  | 27.053 | -1.121 | 13.325 |
|        | 1.00999.99 |     |     | N  |        |        |        |
| ATOM   | 2          | CA  | GLY | 1  | 25.792 | -1.801 | 13.736 |
|        | 1.00999.99 |     |     | C  |        |        |        |
| ATOM   | 3          | C   | GLY | 1  | 24.649 | -0.791 | 13.747 |
|        | 1.00999.99 |     |     | C  |        |        |        |
| ATOM   | 4          | O   | GLY | 1  | 24.244 | -0.309 | 14.804 |
|        | 1.00999.99 |     |     | O  |        |        |        |
| ATOM   | 5          | HA1 | GLY | 1  | 25.911 | -2.215 | 14.724 |
|        | 1.00999.99 |     |     | H  |        |        |        |
| ATOM   | 6          | HA2 | GLY | 1  | 25.567 | -2.593 | 13.037 |
|        | 1.00999.99 |     |     | H  |        |        |        |
| ATOM   | 7          | HT1 | GLY | 1  | 26.929 | -0.697 | 12.385 |
|        | 1.00999.99 |     |     | H  |        |        |        |
| ATOM   | 8          | HT2 | GLY | 1  | 27.826 | -1.817 | 13.292 |
|        | 1.00999.99 |     |     | H  |        |        |        |
| ATOM   | 9          | HT3 | GLY | 1  | 27.285 | -0.376 | 14.011 |
|        | 1.00999.99 |     |     | H  |        |        |        |
| ATOM   | 10         | N   | LEU | 2  | 24.133 | -0.476 | 12.564 |
|        | 1.00999.99 |     |     | N  |        |        |        |
| ATOM   | 11         | CA  | LEU | 2  | 23.035 | 0.478  | 12.450 |
|        | 1.00895.59 |     |     | C  |        |        |        |
| ATOM   | 12         | C   | LEU | 2  | 21.737 | -0.142 | 12.958 |
|        | 1.00532.27 |     |     | C  |        |        |        |
| ATOM   | 13         | O   | LEU | 2  | 21.533 | -1.350 | 12.851 |
|        | 1.00625.21 |     |     | O  |        |        |        |
| ATOM   | 14         | CB  | LEU | 2  | 22.859 | 0.900  | 10.989 |
|        | 1.00999.99 |     |     | C  |        |        |        |
| ATOM   | 15         | CG  | LEU | 2  | 24.165 | 1.500  | 10.452 |
|        | 1.00999.99 |     |     | C  |        |        |        |
| ATOM   | 16         | CD1 | LEU | 2  | 23.990 | 1.834  | 8.967  |
|        | 1.00999.99 |     |     | C  |        |        |        |
| ATOM   | 17         | CD2 | LEU | 2  | 24.520 | 2.779  | 11.232 |
|        | 1.00999.99 |     |     | C  |        |        |        |
| ATOM   | 18         | HN  | LEU | 2  | 24.493 | -0.892 | 11.754 |
|        | 1.00999.99 |     |     | H  |        |        |        |
| ATOM   | 19         | HA  | LEU | 2  | 23.260 | 1.351  | 13.043 |
|        | 1.00890.87 |     |     | H  |        |        |        |
| ATOM   | 20         | HB1 | LEU | 2  | 22.073 | 1.637  | 10.919 |
|        | 1.00924.07 |     |     | H  |        |        |        |
| ATOM   | 21         | HB2 | LEU | 2  | 22.593 | 0.034  | 10.397 |
|        | 1.00999.99 |     |     | H  |        |        |        |
| ATOM   | 22         | HG  | LEU | 2  | 24.962 | 0.777  | 10.562 |

|            |    |      |     |   |   |        |        |        |      |
|------------|----|------|-----|---|---|--------|--------|--------|------|
| 1.00999.99 |    |      |     | H |   |        |        |        |      |
| ATOM       | 23 | HD11 | LEU |   | 2 | 24.947 | 2.090  | 8.540  |      |
| 1.00999.99 |    |      |     | H |   |        |        |        |      |
| ATOM       | 24 | HD12 | LEU |   | 2 | 23.316 | 2.671  | 8.864  |      |
| 1.00999.99 |    |      |     | H |   |        |        |        |      |
| ATOM       | 25 | HD13 | LEU |   | 2 | 23.581 | 0.977  | 8.451  |      |
| 1.00999.99 |    |      |     | H |   |        |        |        |      |
| ATOM       | 26 | HD21 | LEU |   | 2 | 25.156 | 3.409  | 10.627 |      |
| 1.00999.99 |    |      |     | H |   |        |        |        |      |
| ATOM       | 27 | HD22 | LEU |   | 2 | 25.044 | 2.513  | 12.138 |      |
| 1.00999.99 |    |      |     | H |   |        |        |        |      |
| ATOM       | 28 | HD23 | LEU |   | 2 | 23.616 | 3.317  | 11.482 |      |
| 1.00999.99 |    |      |     | H |   |        |        |        |      |
| ATOM       | 29 | N    | CYS |   | 3 | 20.861 | 0.694  | 13.509 |      |
| 1.00271.28 |    |      |     | N |   |        |        |        |      |
| ATOM       | 30 | CA   | CYS |   | 3 | 19.586 | 0.211  | 14.028 |      |
| 1.00104.50 |    |      |     | C |   |        |        |        |      |
| ATOM       | 31 | C    | CYS |   | 3 | 18.764 | -0.439 | 12.917 | 1.00 |
| 90.98      |    |      | C   |   |   |        |        |        |      |
| ATOM       | 32 | O    | CYS |   | 3 | 18.627 | 0.115  | 11.827 |      |
| 1.00207.28 |    |      |     | O |   |        |        |        |      |
| ATOM       | 33 | CB   | CYS |   | 3 | 18.792 | 1.372  | 14.640 | 1.00 |
| 37.83      |    |      | C   |   |   |        |        |        |      |
| ATOM       | 34 | SG   | CYS |   | 3 | 19.374 | 1.695  | 16.321 | 1.00 |
| 81.56      |    |      | S   |   |   |        |        |        |      |
| ATOM       | 35 | HN   | CYS |   | 3 | 21.076 | 1.650  | 13.568 |      |
| 1.00296.55 |    |      |     | H |   |        |        |        |      |
| ATOM       | 36 | HA   | CYS |   | 3 | 19.779 | -0.520 | 14.797 |      |
| 1.00166.45 |    |      |     | H |   |        |        |        |      |
| ATOM       | 37 | HB1  | CYS |   | 3 | 17.742 | 1.118  | 14.673 | 1.00 |
| 40.38      |    |      | H   |   |   |        |        |        |      |
| ATOM       | 38 | HB2  | CYS |   | 3 | 18.928 | 2.258  | 14.038 | 1.00 |
| 98.45      |    |      | H   |   |   |        |        |        |      |
| ATOM       | 39 | N    | SER |   | 4 | 18.206 | -1.609 | 13.211 | 1.00 |
| 85.31      |    |      | N   |   |   |        |        |        |      |
| ATOM       | 40 | CA   | SER |   | 4 | 17.385 | -2.319 | 12.238 | 1.00 |
| 92.94      |    |      | C   |   |   |        |        |        |      |
| ATOM       | 41 | C    | SER |   | 4 | 16.140 | -1.507 | 11.925 | 1.00 |
| 67.37      |    |      | C   |   |   |        |        |        |      |
| ATOM       | 42 | O    | SER |   | 4 | 15.711 | -1.410 | 10.776 |      |
| 1.00102.28 |    |      |     | O |   |        |        |        |      |
| ATOM       | 43 | CB   | SER |   | 4 | 16.946 | -3.666 | 12.806 |      |
| 1.00123.83 |    |      |     | C |   |        |        |        |      |
| ATOM       | 44 | OG   | SER |   | 4 | 16.277 | -4.405 | 11.792 |      |
| 1.00178.89 |    |      |     | O |   |        |        |        |      |
| ATOM       | 45 | HN   | SER |   | 4 | 18.341 | -1.996 | 14.101 |      |
| 1.00163.03 |    |      |     | H |   |        |        |        |      |
| ATOM       | 46 | HA   | SER |   | 4 | 17.950 | -2.480 | 11.334 |      |
| 1.00129.78 |    |      |     | H |   |        |        |        |      |
| ATOM       | 47 | HB1  | SER |   | 4 | 16.269 | -3.491 | 13.638 |      |
| 1.00105.26 |    |      |     | H |   |        |        |        |      |
| ATOM       | 48 | HB2  | SER |   | 4 | 17.804 | -4.219 | 13.149 |      |

|            |    |     |     |   |        |        |        |      |  |  |     |
|------------|----|-----|-----|---|--------|--------|--------|------|--|--|-----|
| 1.00156.87 |    |     |     |   |        |        |        |      |  |  | H   |
| ATOM       | 49 | HG  | SER | 4 | 15.540 | -4.867 | 12.198 |      |  |  |     |
| 1.00218.16 |    |     |     |   |        |        |        |      |  |  | H   |
| ATOM       | 50 | N   | GLU | 5 | 15.552 | -0.948 | 12.979 | 1.00 |  |  |     |
| 41.67      |    |     | N   |   |        |        |        |      |  |  |     |
| ATOM       | 51 | CA  | GLU | 5 | 14.332 | -0.160 | 12.857 | 1.00 |  |  |     |
| 41.21      |    |     | C   |   |        |        |        |      |  |  |     |
| ATOM       | 52 | C   | GLU | 5 | 14.375 | 1.046  | 13.793 | 1.00 |  |  |     |
| 41.92      |    |     | C   |   |        |        |        |      |  |  |     |
| ATOM       | 53 | O   | GLU | 5 | 15.435 | 1.409  | 14.302 | 1.00 |  |  |     |
| 74.72      |    |     | O   |   |        |        |        |      |  |  |     |
| ATOM       | 54 | CB  | GLU | 5 | 13.132 | -1.039 | 13.199 | 1.00 |  |  |     |
| 49.24      |    |     | C   |   |        |        |        |      |  |  |     |
| ATOM       | 55 | CG  | GLU | 5 | 13.301 | -1.581 | 14.611 | 1.00 |  |  |     |
| 55.48      |    |     | C   |   |        |        |        |      |  |  |     |
| ATOM       | 56 | CD  | GLU | 5 | 12.257 | -2.658 | 14.887 | 1.00 |  |  |     |
| 92.06      |    |     | C   |   |        |        |        |      |  |  |     |
| ATOM       | 57 | OE1 | GLU | 5 | 12.260 | -3.192 | 15.985 |      |  |  |     |
| 1.00206.49 |    |     |     |   |        |        |        |      |  |  | O   |
| ATOM       | 58 | OE2 | GLU | 5 | 11.470 | -2.935 | 13.996 |      |  |  |     |
| 1.00197.24 |    |     |     |   |        |        |        |      |  |  | O1- |
| ATOM       | 59 | HN  | GLU | 5 | 15.941 | -1.085 | 13.868 | 1.00 |  |  |     |
| 45.52      |    |     | H   |   |        |        |        |      |  |  |     |
| ATOM       | 60 | HA  | GLU | 5 | 14.229 | 0.186  | 11.847 | 1.00 |  |  |     |
| 60.63      |    |     | H   |   |        |        |        |      |  |  |     |
| ATOM       | 61 | HB1 | GLU | 5 | 13.078 | -1.861 | 12.503 | 1.00 |  |  |     |
| 61.59      |    |     | H   |   |        |        |        |      |  |  |     |
| ATOM       | 62 | HB2 | GLU | 5 | 12.233 | -0.457 | 13.141 | 1.00 |  |  |     |
| 63.66      |    |     | H   |   |        |        |        |      |  |  |     |
| ATOM       | 63 | HG1 | GLU | 5 | 13.182 | -0.777 | 15.322 | 1.00 |  |  |     |
| 58.03      |    |     | H   |   |        |        |        |      |  |  |     |
| ATOM       | 64 | HG2 | GLU | 5 | 14.287 | -2.001 | 14.706 | 1.00 |  |  |     |
| 57.77      |    |     | H   |   |        |        |        |      |  |  |     |
| ATOM       | 65 | N   | ASN | 6 | 13.220 | 1.665  | 14.013 | 1.00 |  |  |     |
| 50.73      |    |     | N   |   |        |        |        |      |  |  |     |
| ATOM       | 66 | CA  | ASN | 6 | 13.146 | 2.833  | 14.886 | 1.00 |  |  |     |
| 71.04      |    |     | C   |   |        |        |        |      |  |  |     |
| ATOM       | 67 | C   | ASN | 6 | 13.594 | 2.478  | 16.300 | 1.00 |  |  |     |
| 65.17      |    |     | C   |   |        |        |        |      |  |  |     |
| ATOM       | 68 | O   | ASN | 6 | 14.288 | 3.258  | 16.953 | 1.00 |  |  |     |
| 94.86      |    |     | O   |   |        |        |        |      |  |  |     |
| ATOM       | 69 | CB  | ASN | 6 | 11.712 | 3.365  | 14.924 | 1.00 |  |  |     |
| 94.83      |    |     | C   |   |        |        |        |      |  |  |     |
| ATOM       | 70 | CG  | ASN | 6 | 11.364 | 4.024  | 13.594 |      |  |  |     |
| 1.00160.94 |    |     |     |   |        |        |        |      |  |  | C   |
| ATOM       | 71 | ND2 | ASN | 6 | 10.112 | 4.181  | 13.262 |      |  |  |     |
| 1.00244.88 |    |     |     |   |        |        |        |      |  |  | N   |
| ATOM       | 72 | OD1 | ASN | 6 | 12.256 | 4.407  | 12.837 |      |  |  |     |
| 1.00219.73 |    |     |     |   |        |        |        |      |  |  | O   |
| ATOM       | 73 | HN  | ASN | 6 | 12.405 | 1.336  | 13.577 | 1.00 |  |  |     |
| 72.81      |    |     | H   |   |        |        |        |      |  |  |     |
| ATOM       | 74 | HA  | ASN | 6 | 13.793 | 3.605  | 14.496 | 1.00 |  |  |     |

|            |     |      |     |   |        |        |        |      |  |
|------------|-----|------|-----|---|--------|--------|--------|------|--|
| 96.02      |     |      | H   |   |        |        |        |      |  |
| ATOM       | 75  | HB1  | ASN | 6 | 11.622 | 4.093  | 15.717 |      |  |
| 1.00111.09 |     |      |     |   |        |        |        |      |  |
| ATOM       | 76  | HB2  | ASN | 6 | 11.031 | 2.548  | 15.108 | 1.00 |  |
| 98.13      |     |      | H   |   |        |        |        |      |  |
| ATOM       | 77  | HD21 | ASN | 6 | 9.402  | 3.875  | 13.866 |      |  |
| 1.00272.43 |     |      |     |   |        |        |        |      |  |
| ATOM       | 78  | HD22 | ASN | 6 | 9.880  | 4.603  | 12.408 |      |  |
| 1.00336.78 |     |      | H   |   |        |        |        |      |  |
| ATOM       | 79  | N    | GLY | 7 | 13.197 | 1.296  | 16.767 | 1.00 |  |
| 51.80      |     |      | N   |   |        |        |        |      |  |
| ATOM       | 80  | CA   | GLY | 7 | 13.563 | 0.833  | 18.110 | 1.00 |  |
| 71.47      |     |      | C   |   |        |        |        |      |  |
| ATOM       | 81  | C    | GLY | 7 | 14.284 | -0.507 | 18.041 | 1.00 |  |
| 41.04      |     |      | C   |   |        |        |        |      |  |
| ATOM       | 82  | O    | GLY | 7 | 13.667 | -1.565 | 18.163 | 1.00 |  |
| 44.54      |     |      | O   |   |        |        |        |      |  |
| ATOM       | 83  | HN   | GLY | 7 | 12.648 | 0.717  | 16.196 | 1.00 |  |
| 45.49      |     |      | H   |   |        |        |        |      |  |
| ATOM       | 84  | HA1  | GLY | 7 | 12.668 | 0.719  | 18.698 |      |  |
| 1.00103.52 |     |      |     |   |        |        |        |      |  |
| ATOM       | 85  | HA2  | GLY | 7 | 14.210 | 1.560  | 18.585 |      |  |
| 1.00108.67 |     |      | H   |   |        |        |        |      |  |
| ATOM       | 86  | N    | ASP | 8 | 15.597 | -0.455 | 17.842 | 1.00 |  |
| 27.00      |     |      | N   |   |        |        |        |      |  |
| ATOM       | 87  | CA   | ASP | 8 | 16.397 | -1.671 | 17.754 | 1.00 |  |
| 14.15      |     |      | C   |   |        |        |        |      |  |
| ATOM       | 88  | C    | ASP | 8 | 16.346 | -2.454 | 19.061 | 1.00 |  |
| 9.37       |     |      | C   |   |        |        |        |      |  |
| ATOM       | 89  | O    | ASP | 8 | 16.206 | -3.678 | 19.056 | 1.00 |  |
| 14.61      |     |      | O   |   |        |        |        |      |  |
| ATOM       | 90  | CB   | ASP | 8 | 17.849 | -1.317 | 17.419 | 1.00 |  |
| 15.06      |     |      | C   |   |        |        |        |      |  |
| ATOM       | 91  | CG   | ASP | 8 | 18.673 | -2.592 | 17.272 | 1.00 |  |
| 21.22      |     |      | C   |   |        |        |        |      |  |
| ATOM       | 92  | OD1  | ASP | 8 | 19.824 | -2.488 | 16.879 |      |  |
| 1.00119.56 |     |      | O   |   |        |        |        |      |  |
| ATOM       | 93  | OD2  | ASP | 8 | 18.143 | -3.655 | 17.555 |      |  |
| 1.00133.27 |     |      | O1- |   |        |        |        |      |  |
| ATOM       | 94  | HN   | ASP | 8 | 16.033 | 0.417  | 17.751 | 1.00 |  |
| 35.63      |     |      | H   |   |        |        |        |      |  |
| ATOM       | 95  | HA   | ASP | 8 | 16.002 | -2.288 | 16.968 | 1.00 |  |
| 20.92      |     |      | H   |   |        |        |        |      |  |
| ATOM       | 96  | HB1  | ASP | 8 | 18.263 | -0.713 | 18.210 | 1.00 |  |
| 29.39      |     |      | H   |   |        |        |        |      |  |
| ATOM       | 97  | HB2  | ASP | 8 | 17.876 | -0.766 | 16.492 | 1.00 |  |
| 44.14      |     |      | H   |   |        |        |        |      |  |
| ATOM       | 98  | N    | CYS | 9 | 16.460 | -1.745 | 20.177 | 1.00 |  |
| 5.93       |     |      | N   |   |        |        |        |      |  |
| ATOM       | 99  | CA   | CYS | 9 | 16.426 | -2.392 | 21.485 | 1.00 |  |
| 7.54       |     |      | C   |   |        |        |        |      |  |
| ATOM       | 100 | C    | CYS | 9 | 15.083 | -3.081 | 21.699 | 1.00 |  |

|            |     |     |     |    |        |        |        |      |  |
|------------|-----|-----|-----|----|--------|--------|--------|------|--|
| 14.60      |     |     | C   |    |        |        |        |      |  |
| ATOM       | 101 | O   | CYS | 9  | 15.016 | -4.210 | 22.187 | 1.00 |  |
| 25.78      |     |     | O   |    |        |        |        |      |  |
| ATOM       | 102 | CB  | CYS | 9  | 16.643 | -1.361 | 22.581 | 1.00 |  |
| 6.63       |     |     | C   |    |        |        |        |      |  |
| ATOM       | 103 | SG  | CYS | 9  | 18.348 | -0.793 | 22.505 | 1.00 |  |
| 10.91      |     |     | S   |    |        |        |        |      |  |
| ATOM       | 104 | HN  | CYS | 9  | 16.570 | -0.774 | 20.118 | 1.00 |  |
| 6.51       |     |     | H   |    |        |        |        |      |  |
| ATOM       | 105 | HA  | CYS | 9  | 17.219 | -3.116 | 21.539 | 1.00 |  |
| 11.12      |     |     | H   |    |        |        |        |      |  |
| ATOM       | 106 | HB1 | CYS | 9  | 16.460 | -1.811 | 23.543 | 1.00 |  |
| 11.28      |     |     | H   |    |        |        |        |      |  |
| ATOM       | 107 | HB2 | CYS | 9  | 15.975 | -0.525 | 22.436 | 1.00 |  |
| 5.04       |     |     | H   |    |        |        |        |      |  |
| ATOM       | 108 | N   | ALA | 10 | 14.019 | -2.384 | 21.320 | 1.00 |  |
| 16.26      |     |     | N   |    |        |        |        |      |  |
| ATOM       | 109 | CA  | ALA | 10 | 12.665 | -2.910 | 21.457 | 1.00 |  |
| 32.04      |     |     | C   |    |        |        |        |      |  |
| ATOM       | 110 | C   | ALA | 10 | 11.692 | -2.052 | 20.651 | 1.00 |  |
| 45.47      |     |     | C   |    |        |        |        |      |  |
| ATOM       | 111 | O   | ALA | 10 | 12.036 | -0.952 | 20.221 |      |  |
| 1.00119.04 |     |     | O   |    |        |        |        |      |  |
| ATOM       | 112 | CB  | ALA | 10 | 12.250 | -2.935 | 22.934 | 1.00 |  |
| 30.10      |     |     | C   |    |        |        |        |      |  |
| ATOM       | 113 | HN  | ALA | 10 | 14.149 | -1.493 | 20.936 | 1.00 |  |
| 12.81      |     |     | H   |    |        |        |        |      |  |
| ATOM       | 114 | HA  | ALA | 10 | 12.644 | -3.918 | 21.070 | 1.00 |  |
| 47.14      |     |     | H   |    |        |        |        |      |  |
| ATOM       | 115 | HB1 | ALA | 10 | 13.104 | -3.190 | 23.543 | 1.00 |  |
| 84.37      |     |     | H   |    |        |        |        |      |  |
| ATOM       | 116 | HB2 | ALA | 10 | 11.473 | -3.672 | 23.078 |      |  |
| 1.00118.20 |     |     | H   |    |        |        |        |      |  |
| ATOM       | 117 | HB3 | ALA | 10 | 11.879 | -1.963 | 23.225 |      |  |
| 1.00117.32 |     |     | H   |    |        |        |        |      |  |
| ATOM       | 118 | N   | ALA | 11 | 10.484 | -2.560 | 20.443 | 1.00 |  |
| 30.62      |     |     | N   |    |        |        |        |      |  |
| ATOM       | 119 | CA  | ALA | 11 | 9.482  | -1.823 | 19.678 | 1.00 |  |
| 35.24      |     |     | C   |    |        |        |        |      |  |
| ATOM       | 120 | C   | ALA | 11 | 9.151  | -0.488 | 20.344 | 1.00 |  |
| 22.78      |     |     | C   |    |        |        |        |      |  |
| ATOM       | 121 | O   | ALA | 11 | 9.009  | 0.530  | 19.669 | 1.00 |  |
| 53.33      |     |     | O   |    |        |        |        |      |  |
| ATOM       | 122 | CB  | ALA | 11 | 8.208  | -2.660 | 19.551 | 1.00 |  |
| 60.49      |     |     | C   |    |        |        |        |      |  |
| ATOM       | 123 | HN  | ALA | 11 | 10.262 | -3.444 | 20.805 | 1.00 |  |
| 50.37      |     |     | H   |    |        |        |        |      |  |
| ATOM       | 124 | HA  | ALA | 11 | 9.870  | -1.633 | 18.689 | 1.00 |  |
| 41.70      |     |     | H   |    |        |        |        |      |  |
| ATOM       | 125 | HB1 | ALA | 11 | 7.412  | -2.044 | 19.155 |      |  |
| 1.00157.06 |     |     | H   |    |        |        |        |      |  |
| ATOM       | 126 | HB2 | ALA | 11 | 7.924  | -3.032 | 20.523 |      |  |

|            |     |     |     |     |    |        |        |        |      |
|------------|-----|-----|-----|-----|----|--------|--------|--------|------|
| 1.00148.83 |     |     |     | H   |    |        |        |        |      |
| ATOM       | 127 | HB3 | ALA |     | 11 | 8.387  | -3.489 | 18.884 |      |
| 1.00137.06 |     |     |     | H   |    |        |        |        |      |
| ATOM       | 128 | N   | ASP |     | 12 | 9.023  | -0.501 | 21.669 | 1.00 |
| 18.98      |     |     | N   |     |    |        |        |        |      |
| ATOM       | 129 | CA  | ASP |     | 12 | 8.700  | 0.719  | 22.410 | 1.00 |
| 31.05      |     |     | C   |     |    |        |        |        |      |
| ATOM       | 130 | C   | ASP |     | 12 | 9.953  | 1.540  | 22.699 | 1.00 |
| 22.98      |     |     | C   |     |    |        |        |        |      |
| ATOM       | 131 | O   | ASP |     | 12 | 9.903  | 2.769  | 22.757 | 1.00 |
| 37.14      |     |     | O   |     |    |        |        |        |      |
| ATOM       | 132 | CB  | ASP |     | 12 | 8.017  | 0.355  | 23.730 | 1.00 |
| 48.35      |     |     | C   |     |    |        |        |        |      |
| ATOM       | 133 | CG  | ASP |     | 12 | 6.632  | -0.222 | 23.459 |      |
| 1.00104.83 |     |     |     | C   |    |        |        |        |      |
| ATOM       | 134 | OD1 | ASP |     | 12 | 6.153  | -0.063 | 22.349 |      |
| 1.00258.73 |     |     |     | O   |    |        |        |        |      |
| ATOM       | 135 | OD2 | ASP |     | 12 | 6.071  | -0.813 | 24.367 |      |
| 1.00213.46 |     |     |     | O1- |    |        |        |        |      |
| ATOM       | 136 | HN  | ASP |     | 12 | 9.142  | -1.342 | 22.156 | 1.00 |
| 36.19      |     |     | H   |     |    |        |        |        |      |
| ATOM       | 137 | HA  | ASP |     | 12 | 8.018  | 1.318  | 21.824 | 1.00 |
| 49.76      |     |     | H   |     |    |        |        |        |      |
| ATOM       | 138 | HB1 | ASP |     | 12 | 7.922  | 1.240  | 24.341 | 1.00 |
| 95.71      |     |     | H   |     |    |        |        |        |      |
| ATOM       | 139 | HB2 | ASP |     | 12 | 8.615  | -0.379 | 24.252 | 1.00 |
| 54.37      |     |     | H   |     |    |        |        |        |      |
| ATOM       | 140 | N   | GLU |     | 13 | 11.076 | 0.855  | 22.890 | 1.00 |
| 17.60      |     |     | N   |     |    |        |        |        |      |
| ATOM       | 141 | CA  | GLU |     | 13 | 12.337 | 1.529  | 23.184 | 1.00 |
| 12.01      |     |     | C   |     |    |        |        |        |      |
| ATOM       | 142 | C   | GLU |     | 13 | 12.920 | 2.166  | 21.923 | 1.00 |
| 10.07      |     |     | C   |     |    |        |        |        |      |
| ATOM       | 143 | O   | GLU |     | 13 | 12.559 | 1.792  | 20.807 | 1.00 |
| 12.81      |     |     | O   |     |    |        |        |        |      |
| ATOM       | 144 | CB  | GLU |     | 13 | 13.329 | 0.524  | 23.766 | 1.00 |
| 11.74      |     |     | C   |     |    |        |        |        |      |
| ATOM       | 145 | CG  | GLU |     | 13 | 12.764 | -0.037 | 25.075 | 1.00 |
| 13.49      |     |     | C   |     |    |        |        |        |      |
| ATOM       | 146 | CD  | GLU |     | 13 | 13.595 | -1.224 | 25.542 |      |
| 1.00142.36 |     |     |     | C   |    |        |        |        |      |
| ATOM       | 147 | OE1 | GLU |     | 13 | 14.648 | -1.447 | 24.969 |      |
| 1.00339.06 |     |     |     | O   |    |        |        |        |      |
| ATOM       | 148 | OE2 | GLU |     | 13 | 13.165 | -1.898 | 26.464 |      |
| 1.00335.28 |     |     |     | O1- |    |        |        |        |      |
| ATOM       | 149 | HN  | GLU |     | 13 | 11.055 | -0.124 | 22.838 | 1.00 |
| 28.36      |     |     | H   |     |    |        |        |        |      |
| ATOM       | 150 | HA  | GLU |     | 13 | 12.158 | 2.302  | 23.917 | 1.00 |
| 13.06      |     |     | H   |     |    |        |        |        |      |
| ATOM       | 151 | HB1 | GLU |     | 13 | 14.268 | 1.017  | 23.963 | 1.00 |
| 13.76      |     |     | H   |     |    |        |        |        |      |
| ATOM       | 152 | HB2 | GLU |     | 13 | 13.485 | -0.280 | 23.062 | 1.00 |

|       |     |     |     |    |        |        |        |      |
|-------|-----|-----|-----|----|--------|--------|--------|------|
| 9.94  |     |     | H   |    |        |        |        |      |
| ATOM  | 153 | HG1 | GLU | 13 | 11.745 | -0.353 | 24.917 | 1.00 |
| 66.02 |     |     | H   |    |        |        |        |      |
| ATOM  | 154 | HG2 | GLU | 13 | 12.785 | 0.734  | 25.831 | 1.00 |
| 56.23 |     |     | H   |    |        |        |        |      |
| ATOM  | 155 | N   | CYS | 14 | 13.824 | 3.131  | 22.110 | 1.00 |
| 9.12  |     |     | N   |    |        |        |        |      |
| ATOM  | 156 | CA  | CYS | 14 | 14.461 | 3.823  | 20.983 | 1.00 |
| 10.69 |     |     | C   |    |        |        |        |      |
| ATOM  | 157 | C   | CYS | 14 | 15.955 | 3.542  | 20.974 | 1.00 |
| 9.56  |     |     | C   |    |        |        |        |      |
| ATOM  | 158 | O   | CYS | 14 | 16.562 | 3.340  | 22.025 | 1.00 |
| 13.62 |     |     | O   |    |        |        |        |      |
| ATOM  | 159 | CB  | CYS | 14 | 14.232 | 5.332  | 21.088 | 1.00 |
| 13.96 |     |     | C   |    |        |        |        |      |
| ATOM  | 160 | SG  | CYS | 14 | 15.130 | 6.161  | 19.750 | 1.00 |
| 42.96 |     |     | S   |    |        |        |        |      |
| ATOM  | 161 | HN  | CYS | 14 | 14.075 | 3.383  | 23.024 | 1.00 |
| 9.76  |     |     | H   |    |        |        |        |      |
| ATOM  | 162 | HA  | CYS | 14 | 14.034 | 3.472  | 20.053 | 1.00 |
| 15.54 |     |     | H   |    |        |        |        |      |
| ATOM  | 163 | HB1 | CYS | 14 | 14.592 | 5.688  | 22.042 | 1.00 |
| 50.72 |     |     | H   |    |        |        |        |      |
| ATOM  | 164 | HB2 | CYS | 14 | 13.177 | 5.544  | 21.001 | 1.00 |
| 46.13 |     |     | H   |    |        |        |        |      |
| ATOM  | 165 | N   | CYS | 15 | 16.548 | 3.537  | 19.782 | 1.00 |
| 9.60  |     |     | N   |    |        |        |        |      |
| ATOM  | 166 | CA  | CYS | 15 | 17.979 | 3.283  | 19.641 | 1.00 |
| 9.28  |     |     | C   |    |        |        |        |      |
| ATOM  | 167 | C   | CYS | 15 | 18.582 | 4.277  | 18.665 | 1.00 |
| 9.92  |     |     | C   |    |        |        |        |      |
| ATOM  | 168 | O   | CYS | 15 | 17.892 | 4.791  | 17.783 | 1.00 |
| 13.31 |     |     | O   |    |        |        |        |      |
| ATOM  | 169 | CB  | CYS | 15 | 18.209 | 1.865  | 19.113 | 1.00 |
| 12.90 |     |     | C   |    |        |        |        |      |
| ATOM  | 170 | SG  | CYS | 15 | 17.663 | 1.777  | 17.391 | 1.00 |
| 39.11 |     |     | S   |    |        |        |        |      |
| ATOM  | 171 | HN  | CYS | 15 | 16.014 | 3.712  | 18.979 | 1.00 |
| 13.12 |     |     | H   |    |        |        |        |      |
| ATOM  | 172 | HA  | CYS | 15 | 18.470 | 3.386  | 20.600 | 1.00 |
| 8.26  |     |     | H   |    |        |        |        |      |
| ATOM  | 173 | HB1 | CYS | 15 | 17.642 | 1.163  | 19.704 | 1.00 |
| 24.82 |     |     | H   |    |        |        |        |      |
| ATOM  | 174 | HB2 | CYS | 15 | 19.259 | 1.623  | 19.172 | 1.00 |
| 27.31 |     |     | H   |    |        |        |        |      |
| ATOM  | 175 | N   | VAL | 16 | 19.867 | 4.545  | 18.821 | 1.00 |
| 9.56  |     |     | N   |    |        |        |        |      |
| ATOM  | 176 | CA  | VAL | 16 | 20.537 | 5.481  | 17.936 | 1.00 |
| 11.99 |     |     | C   |    |        |        |        |      |
| ATOM  | 177 | C   | VAL | 16 | 22.049 | 5.364  | 18.081 | 1.00 |
| 7.73  |     |     | C   |    |        |        |        |      |
| ATOM  | 178 | O   | VAL | 16 | 22.601 | 5.597  | 19.156 | 1.00 |

|            |     |      |     |     |        |       |        |      |  |
|------------|-----|------|-----|-----|--------|-------|--------|------|--|
| 8.83       |     |      | O   |     |        |       |        |      |  |
| ATOM       | 179 | CB   | VAL | 16  | 20.072 | 6.905 | 18.261 | 1.00 |  |
| 18.37      |     |      | C   |     |        |       |        |      |  |
| ATOM       | 180 | CG1  | VAL | 16  | 20.647 | 7.360 | 19.609 | 1.00 |  |
| 39.61      |     |      | C   |     |        |       |        |      |  |
| ATOM       | 181 | CG2  | VAL | 16  | 20.529 | 7.851 | 17.150 |      |  |
| 1.00115.21 |     |      |     | C   |        |       |        |      |  |
| ATOM       | 182 | HN   | VAL | 16  | 20.372 | 4.108 | 19.540 | 1.00 |  |
| 9.76       |     |      | H   |     |        |       |        |      |  |
| ATOM       | 183 | HA   | VAL | 16  | 20.265 | 5.253 | 16.917 | 1.00 |  |
| 17.27      |     |      | H   |     |        |       |        |      |  |
| ATOM       | 184 | HB   | VAL | 16  | 18.992 | 6.917 | 18.315 | 1.00 |  |
| 52.63      |     |      | H   |     |        |       |        |      |  |
| ATOM       | 185 | HG11 | VAL | 16  | 20.642 | 6.531 | 20.305 |      |  |
| 1.00128.07 |     |      |     | H   |        |       |        |      |  |
| ATOM       | 186 | HG12 | VAL | 16  | 20.041 | 8.160 | 20.006 |      |  |
| 1.00154.13 |     |      |     | H   |        |       |        |      |  |
| ATOM       | 187 | HG13 | VAL | 16  | 21.660 | 7.710 | 19.475 |      |  |
| 1.00135.74 |     |      |     | H   |        |       |        |      |  |
| ATOM       | 188 | HG21 | VAL | 16  | 21.567 | 7.663 | 16.922 |      |  |
| 1.00229.05 |     |      |     | H   |        |       |        |      |  |
| ATOM       | 189 | HG22 | VAL | 16  | 20.410 | 8.873 | 17.476 |      |  |
| 1.00261.82 |     |      |     | H   |        |       |        |      |  |
| ATOM       | 190 | HG23 | VAL | 16  | 19.929 | 7.681 | 16.268 |      |  |
| 1.00210.07 |     |      |     | H   |        |       |        |      |  |
| ATOM       | 191 | N    | ASP | 17  | 22.718 | 4.989 | 16.989 | 1.00 |  |
| 14.34      |     |      | N   |     |        |       |        |      |  |
| ATOM       | 192 | CA   | ASP | 17  | 24.175 | 4.835 | 17.001 | 1.00 |  |
| 11.90      |     |      | C   |     |        |       |        |      |  |
| ATOM       | 193 | C    | ASP | 17  | 24.851 | 6.017 | 16.317 | 1.00 |  |
| 13.15      |     |      | C   |     |        |       |        |      |  |
| ATOM       | 194 | O    | ASP | 17  | 24.635 | 6.267 | 15.131 | 1.00 |  |
| 25.96      |     |      | O   |     |        |       |        |      |  |
| ATOM       | 195 | CB   | ASP | 17  | 24.567 | 3.543 | 16.283 | 1.00 |  |
| 20.80      |     |      | C   |     |        |       |        |      |  |
| ATOM       | 196 | CG   | ASP | 17  | 24.157 | 2.337 | 17.120 | 1.00 |  |
| 28.72      |     |      | C   |     |        |       |        |      |  |
| ATOM       | 197 | OD1  | ASP | 17  | 23.837 | 2.529 | 18.282 |      |  |
| 1.00135.42 |     |      |     | O   |        |       |        |      |  |
| ATOM       | 198 | OD2  | ASP | 17  | 24.169 | 1.239 | 16.589 |      |  |
| 1.00114.17 |     |      |     | O1- |        |       |        |      |  |
| ATOM       | 199 | HN   | ASP | 17  | 22.223 | 4.808 | 16.163 | 1.00 |  |
| 28.29      |     |      | H   |     |        |       |        |      |  |
| ATOM       | 200 | HA   | ASP | 17  | 24.522 | 4.778 | 18.024 | 1.00 |  |
| 10.49      |     |      | H   |     |        |       |        |      |  |
| ATOM       | 201 | HB1  | ASP | 17  | 25.638 | 3.527 | 16.135 | 1.00 |  |
| 22.42      |     |      | H   |     |        |       |        |      |  |
| ATOM       | 202 | HB2  | ASP | 17  | 24.071 | 3.501 | 15.325 | 1.00 |  |
| 29.52      |     |      | H   |     |        |       |        |      |  |
| ATOM       | 203 | N    | THR | 18  | 25.684 | 6.728 | 17.072 | 1.00 |  |
| 11.55      |     |      | N   |     |        |       |        |      |  |
| ATOM       | 204 | CA   | THR | 18  | 26.418 | 7.879 | 16.543 | 1.00 |  |



|            |     |      |     |    |        |        |        |      |  |
|------------|-----|------|-----|----|--------|--------|--------|------|--|
| 17.10      |     |      | C   |    |        |        |        |      |  |
| ATOM       | 205 | C    | THR | 18 | 27.886 | 7.517  | 16.367 | 1.00 |  |
| 10.63      |     |      | C   |    |        |        |        |      |  |
| ATOM       | 206 | O    | THR | 18 | 28.347 | 6.502  | 16.886 | 1.00 |  |
| 6.49       |     |      | O   |    |        |        |        |      |  |
| ATOM       | 207 | CB   | THR | 18 | 26.294 | 9.071  | 17.495 | 1.00 |  |
| 28.52      |     |      | C   |    |        |        |        |      |  |
| ATOM       | 208 | CG2  | THR | 18 | 24.914 | 9.708  | 17.358 | 1.00 |  |
| 45.38      |     |      | C   |    |        |        |        |      |  |
| ATOM       | 209 | OG1  | THR | 18 | 26.484 | 8.627  | 18.829 | 1.00 |  |
| 26.49      |     |      | O   |    |        |        |        |      |  |
| ATOM       | 210 | HN   | THR | 18 | 25.820 | 6.467  | 18.007 | 1.00 |  |
| 13.96      |     |      | H   |    |        |        |        |      |  |
| ATOM       | 211 | HA   | THR | 18 | 26.011 | 8.158  | 15.580 | 1.00 |  |
| 26.43      |     |      | H   |    |        |        |        |      |  |
| ATOM       | 212 | HB   | THR | 18 | 27.048 | 9.807  | 17.254 | 1.00 |  |
| 37.43      |     |      | H   |    |        |        |        |      |  |
| ATOM       | 213 | HG1  | THR | 18 | 25.815 | 9.043  | 19.378 | 1.00 |  |
| 71.62      |     |      | H   |    |        |        |        |      |  |
| ATOM       | 214 | HG21 | THR | 18 | 24.746 | 10.383 | 18.184 |      |  |
| 1.00100.44 |     |      |     | H  |        |        |        |      |  |
| ATOM       | 215 | HG22 | THR | 18 | 24.158 | 8.937  | 17.362 |      |  |
| 1.00129.42 |     |      |     | H  |        |        |        |      |  |
| ATOM       | 216 | HG23 | THR | 18 | 24.864 | 10.258 | 16.429 |      |  |
| 1.00156.21 |     |      |     | H  |        |        |        |      |  |
| ATOM       | 217 | N    | VAL | 19 | 28.612 | 8.360  | 15.641 | 1.00 |  |
| 16.32      |     |      | N   |    |        |        |        |      |  |
| ATOM       | 218 | CA   | VAL | 19 | 30.018 | 8.149  | 15.398 | 1.00 |  |
| 13.34      |     |      | C   |    |        |        |        |      |  |
| ATOM       | 219 | C    | VAL | 19 | 30.535 | 9.250  | 14.496 | 1.00 |  |
| 25.88      |     |      | C   |    |        |        |        |      |  |
| ATOM       | 220 | O    | VAL | 19 | 30.072 | 9.446  | 13.372 | 1.00 |  |
| 42.11      |     |      | O   |    |        |        |        |      |  |
| ATOM       | 221 | CB   | VAL | 19 | 30.283 | 6.780  | 14.770 | 1.00 |  |
| 15.48      |     |      | C   |    |        |        |        |      |  |
| ATOM       | 222 | CG1  | VAL | 19 | 29.327 | 6.544  | 13.597 | 1.00 |  |
| 29.06      |     |      | C   |    |        |        |        |      |  |
| ATOM       | 223 | CG2  | VAL | 19 | 31.734 | 6.731  | 14.271 | 1.00 |  |
| 20.67      |     |      | C   |    |        |        |        |      |  |
| ATOM       | 224 | HN   | VAL | 19 | 28.197 | 9.160  | 15.269 | 1.00 |  |
| 26.89      |     |      | H   |    |        |        |        |      |  |
| ATOM       | 225 | HA   | VAL | 19 | 30.542 | 8.203  | 16.342 | 1.00 |  |
| 8.08       |     |      | H   |    |        |        |        |      |  |
| ATOM       | 226 | HB   | VAL | 19 | 30.135 | 6.019  | 15.517 | 1.00 |  |
| 11.49      |     |      | H   |    |        |        |        |      |  |
| ATOM       | 227 | HG11 | VAL | 19 | 29.432 | 5.529  | 13.247 |      |  |
| 1.00137.43 |     |      |     | H  |        |        |        |      |  |
| ATOM       | 228 | HG12 | VAL | 19 | 29.563 | 7.227  | 12.796 | 1.00 |  |
| 93.29      |     |      | H   |    |        |        |        |      |  |
| ATOM       | 229 | HG13 | VAL | 19 | 28.309 | 6.708  | 13.921 |      |  |
| 1.00108.69 |     |      |     | H  |        |        |        |      |  |
| ATOM       | 230 | HG21 | VAL | 19 | 31.814 | 7.284  | 13.346 | 1.00 |  |

|            |     |      |     |    |        |        |        |      |  |
|------------|-----|------|-----|----|--------|--------|--------|------|--|
| 99.42      |     |      | H   |    |        |        |        |      |  |
| ATOM       | 231 | HG22 | VAL | 19 | 32.027 | 5.706  | 14.107 |      |  |
| 1.00111.36 |     |      |     |    |        |        |        |      |  |
| ATOM       | 232 | HG23 | VAL | 19 | 32.383 | 7.182  | 15.011 | 1.00 |  |
| 77.11      |     |      | H   |    |        |        |        |      |  |
| ATOM       | 233 | N    | PHE | 20 | 31.484 | 9.971  | 15.032 | 1.00 |  |
| 24.58      |     |      | N   |    |        |        |        |      |  |
| ATOM       | 234 | CA   | PHE | 20 | 32.102 | 11.094 | 14.349 | 1.00 |  |
| 40.34      |     |      | C   |    |        |        |        |      |  |
| ATOM       | 235 | C    | PHE | 20 | 33.373 | 10.671 | 13.618 | 1.00 |  |
| 40.37      |     |      | C   |    |        |        |        |      |  |
| ATOM       | 236 | O    | PHE | 20 | 33.335 | 10.237 | 12.466 | 1.00 |  |
| 66.02      |     |      | O   |    |        |        |        |      |  |
| ATOM       | 237 | CB   | PHE | 20 | 32.427 | 12.194 | 15.385 | 1.00 |  |
| 48.79      |     |      | C   |    |        |        |        |      |  |
| ATOM       | 238 | CG   | PHE | 20 | 32.644 | 11.593 | 16.766 | 1.00 |  |
| 35.75      |     |      | C   |    |        |        |        |      |  |
| ATOM       | 239 | CD1  | PHE | 20 | 31.573 | 11.006 | 17.468 | 1.00 |  |
| 30.20      |     |      | C   |    |        |        |        |      |  |
| ATOM       | 240 | CD2  | PHE | 20 | 33.914 | 11.640 | 17.358 | 1.00 |  |
| 40.95      |     |      | C   |    |        |        |        |      |  |
| ATOM       | 241 | CE1  | PHE | 20 | 31.780 | 10.472 | 18.743 | 1.00 |  |
| 30.41      |     |      | C   |    |        |        |        |      |  |
| ATOM       | 242 | CE2  | PHE | 20 | 34.117 | 11.102 | 18.634 | 1.00 |  |
| 45.84      |     |      | C   |    |        |        |        |      |  |
| ATOM       | 243 | CZ   | PHE | 20 | 33.052 | 10.518 | 19.326 | 1.00 |  |
| 40.81      |     |      | C   |    |        |        |        |      |  |
| ATOM       | 244 | HN   | PHE | 20 | 31.763 | 9.750  | 15.937 | 1.00 |  |
| 16.73      |     |      | H   |    |        |        |        |      |  |
| ATOM       | 245 | HA   | PHE | 20 | 31.407 | 11.496 | 13.624 | 1.00 |  |
| 59.91      |     |      | H   |    |        |        |        |      |  |
| ATOM       | 246 | HB1  | PHE | 20 | 31.608 | 12.873 | 15.435 | 1.00 |  |
| 67.15      |     |      | H   |    |        |        |        |      |  |
| ATOM       | 247 | HB2  | PHE | 20 | 33.310 | 12.741 | 15.087 | 1.00 |  |
| 58.17      |     |      | H   |    |        |        |        |      |  |
| ATOM       | 248 | HD1  | PHE | 20 | 30.587 | 10.957 | 17.021 | 1.00 |  |
| 33.34      |     |      | H   |    |        |        |        |      |  |
| ATOM       | 249 | HD2  | PHE | 20 | 34.736 | 12.092 | 16.828 | 1.00 |  |
| 49.35      |     |      | H   |    |        |        |        |      |  |
| ATOM       | 250 | HE1  | PHE | 20 | 30.958 | 10.024 | 19.277 | 1.00 |  |
| 30.61      |     |      | H   |    |        |        |        |      |  |
| ATOM       | 251 | HE2  | PHE | 20 | 35.099 | 11.137 | 19.084 | 1.00 |  |
| 61.27      |     |      | H   |    |        |        |        |      |  |
| ATOM       | 252 | HZ   | PHE | 20 | 33.209 | 10.104 | 20.310 | 1.00 |  |
| 52.66      |     |      | H   |    |        |        |        |      |  |
| ATOM       | 253 | N    | GLU | 21 | 34.493 | 10.836 | 14.297 | 1.00 |  |
| 41.31      |     |      | N   |    |        |        |        |      |  |
| ATOM       | 254 | CA   | GLU | 21 | 35.795 | 10.515 | 13.734 | 1.00 |  |
| 56.16      |     |      | C   |    |        |        |        |      |  |
| ATOM       | 255 | C    | GLU | 21 | 36.072 | 9.010  | 13.806 | 1.00 |  |
| 58.61      |     |      | C   |    |        |        |        |      |  |
| ATOM       | 256 | O    | GLU | 21 | 36.922 | 8.495  | 13.079 |      |  |

|            |     |     |     |     |    |        |        |        |      |  |
|------------|-----|-----|-----|-----|----|--------|--------|--------|------|--|
| 1.00201.19 |     |     |     |     |    |        |        |        |      |  |
| ATOM       | 257 | CB  | GLU | O   | 21 | 36.850 | 11.328 | 14.504 | 1.00 |  |
| 57.37      |     |     |     | C   |    |        |        |        |      |  |
| ATOM       | 258 | CG  | GLU |     | 21 | 38.228 | 10.652 | 14.458 |      |  |
| 1.00193.56 |     |     |     | C   |    |        |        |        |      |  |
| ATOM       | 259 | CD  | GLU |     | 21 | 39.293 | 11.605 | 14.990 |      |  |
| 1.00304.62 |     |     |     | C   |    |        |        |        |      |  |
| ATOM       | 260 | OE1 | GLU |     | 21 | 40.404 | 11.558 | 14.489 |      |  |
| 1.00451.81 |     |     |     | O   |    |        |        |        |      |  |
| ATOM       | 261 | OE2 | GLU |     | 21 | 38.981 | 12.367 | 15.889 |      |  |
| 1.00442.88 |     |     |     | O1- |    |        |        |        |      |  |
| ATOM       | 262 | HN  | GLU |     | 21 | 34.445 | 11.205 | 15.203 | 1.00 |  |
| 50.82      |     |     |     | H   |    |        |        |        |      |  |
| ATOM       | 263 | HA  | GLU |     | 21 | 35.810 | 10.819 | 12.698 | 1.00 |  |
| 85.72      |     |     |     | H   |    |        |        |        |      |  |
| ATOM       | 264 | HB1 | GLU |     | 21 | 36.527 | 11.428 | 15.529 | 1.00 |  |
| 46.37      |     |     |     | H   |    |        |        |        |      |  |
| ATOM       | 265 | HB2 | GLU |     | 21 | 36.928 | 12.315 | 14.064 |      |  |
| 1.00131.81 |     |     |     | H   |    |        |        |        |      |  |
| ATOM       | 266 | HG1 | GLU |     | 21 | 38.464 | 10.386 | 13.438 |      |  |
| 1.00314.91 |     |     |     | H   |    |        |        |        |      |  |
| ATOM       | 267 | HG2 | GLU |     | 21 | 38.211 | 9.760  | 15.067 |      |  |
| 1.00266.92 |     |     |     | H   |    |        |        |        |      |  |
| ATOM       | 268 | N   | GLY |     | 22 | 35.353 | 8.310  | 14.678 | 1.00 |  |
| 86.70      |     |     |     | N   |    |        |        |        |      |  |
| ATOM       | 269 | CA  | GLY |     | 22 | 35.534 | 6.866  | 14.826 |      |  |
| 1.00104.66 |     |     |     | C   |    |        |        |        |      |  |
| ATOM       | 270 | C   | GLY |     | 22 | 36.519 | 6.544  | 15.944 | 1.00 |  |
| 71.50      |     |     |     | C   |    |        |        |        |      |  |
| ATOM       | 271 | O   | GLY |     | 22 | 36.653 | 5.389  | 16.349 | 1.00 |  |
| 89.87      |     |     |     | O   |    |        |        |        |      |  |
| ATOM       | 272 | HN  | GLY |     | 22 | 34.688 | 8.770  | 15.233 |      |  |
| 1.00214.64 |     |     |     | H   |    |        |        |        |      |  |
| ATOM       | 273 | HA1 | GLY |     | 22 | 35.905 | 6.450  | 13.900 |      |  |
| 1.00152.47 |     |     |     | H   |    |        |        |        |      |  |
| ATOM       | 274 | HA2 | GLY |     | 22 | 34.582 | 6.412  | 15.058 |      |  |
| 1.00118.15 |     |     |     | H   |    |        |        |        |      |  |
| ATOM       | 275 | N   | ASP |     | 23 | 37.200 | 7.567  | 16.450 | 1.00 |  |
| 44.68      |     |     |     | N   |    |        |        |        |      |  |
| ATOM       | 276 | CA  | ASP |     | 23 | 38.154 | 7.360  | 17.534 | 1.00 |  |
| 43.33      |     |     |     | C   |    |        |        |        |      |  |
| ATOM       | 277 | C   | ASP |     | 23 | 37.431 | 6.789  | 18.744 | 1.00 |  |
| 37.55      |     |     |     | C   |    |        |        |        |      |  |
| ATOM       | 278 | O   | ASP |     | 23 | 37.922 | 5.878  | 19.411 | 1.00 |  |
| 61.37      |     |     |     | O   |    |        |        |        |      |  |
| ATOM       | 279 | CB  | ASP |     | 23 | 38.823 | 8.684  | 17.909 | 1.00 |  |
| 40.74      |     |     |     | C   |    |        |        |        |      |  |
| ATOM       | 280 | CG  | ASP |     | 23 | 39.870 | 8.449  | 18.993 |      |  |
| 1.00141.86 |     |     |     | C   |    |        |        |        |      |  |
| ATOM       | 281 | OD1 | ASP |     | 23 | 39.937 | 7.340  | 19.494 |      |  |
| 1.00328.18 |     |     |     | O   |    |        |        |        |      |  |
| ATOM       | 282 | OD2 | ASP |     | 23 | 40.589 | 9.384  | 19.307 |      |  |

|            |     |     |     |     |        |        |        |      |  |
|------------|-----|-----|-----|-----|--------|--------|--------|------|--|
| 1.00304.58 |     |     |     | O1- |        |        |        |      |  |
| ATOM       | 283 | HN  | ASP | 23  | 37.051 | 8.470  | 16.100 | 1.00 |  |
| 40.86      |     |     | H   |     |        |        |        |      |  |
| ATOM       | 284 | HA  | ASP | 23  | 38.909 | 6.661  | 17.211 | 1.00 |  |
| 72.12      |     |     | H   |     |        |        |        |      |  |
| ATOM       | 285 | HB1 | ASP | 23  | 38.076 | 9.372  | 18.277 | 1.00 |  |
| 94.15      |     |     | H   |     |        |        |        |      |  |
| ATOM       | 286 | HB2 | ASP | 23  | 39.300 | 9.105  | 17.035 | 1.00 |  |
| 93.26      |     |     | H   |     |        |        |        |      |  |
| ATOM       | 287 | N   | MET | 24  | 36.247 | 7.333  | 19.009 | 1.00 |  |
| 23.24      |     |     | N   |     |        |        |        |      |  |
| ATOM       | 288 | CA  | MET | 24  | 35.419 | 6.888  | 20.127 | 1.00 |  |
| 32.50      |     |     | C   |     |        |        |        |      |  |
| ATOM       | 289 | C   | MET | 24  | 33.962 | 6.823  | 19.684 | 1.00 |  |
| 25.13      |     |     | C   |     |        |        |        |      |  |
| ATOM       | 290 | O   | MET | 24  | 33.277 | 7.845  | 19.636 | 1.00 |  |
| 54.40      |     |     | O   |     |        |        |        |      |  |
| ATOM       | 291 | CB  | MET | 24  | 35.550 | 7.870  | 21.292 | 1.00 |  |
| 47.36      |     |     | C   |     |        |        |        |      |  |
| ATOM       | 292 | CG  | MET | 24  | 37.024 | 8.014  | 21.675 |      |  |
| 1.00151.73 |     |     |     | C   |        |        |        |      |  |
| ATOM       | 293 | SD  | MET | 24  | 37.175 | 9.161  | 23.070 |      |  |
| 1.00209.23 |     |     |     | S   |        |        |        |      |  |
| ATOM       | 294 | CE  | MET | 24  | 36.658 | 10.665 | 22.203 |      |  |
| 1.00243.29 |     |     |     | C   |        |        |        |      |  |
| ATOM       | 295 | HN  | MET | 24  | 35.916 | 8.050  | 18.428 | 1.00 |  |
| 17.32      |     |     | H   |     |        |        |        |      |  |
| ATOM       | 296 | HA  | MET | 24  | 35.735 | 5.907  | 20.452 | 1.00 |  |
| 48.94      |     |     | H   |     |        |        |        |      |  |
| ATOM       | 297 | HB1 | MET | 24  | 34.995 | 7.499  | 22.140 |      |  |
| 1.00124.40 |     |     |     | H   |        |        |        |      |  |
| ATOM       | 298 | HB2 | MET | 24  | 35.157 | 8.832  | 20.996 |      |  |
| 1.00166.96 |     |     |     | H   |        |        |        |      |  |
| ATOM       | 299 | HG1 | MET | 24  | 37.580 | 8.396  | 20.831 |      |  |
| 1.00331.71 |     |     |     | H   |        |        |        |      |  |
| ATOM       | 300 | HG2 | MET | 24  | 37.418 | 7.050  | 21.957 |      |  |
| 1.00302.30 |     |     |     | H   |        |        |        |      |  |
| ATOM       | 301 | HE1 | MET | 24  | 37.116 | 11.524 | 22.674 |      |  |
| 1.00340.44 |     |     |     | H   |        |        |        |      |  |
| ATOM       | 302 | HE2 | MET | 24  | 35.584 | 10.761 | 22.255 |      |  |
| 1.00373.88 |     |     |     | H   |        |        |        |      |  |
| ATOM       | 303 | HE3 | MET | 24  | 36.960 | 10.610 | 21.168 |      |  |
| 1.00386.81 |     |     |     | H   |        |        |        |      |  |
| ATOM       | 304 | N   | VAL | 25  | 33.493 | 5.626  | 19.352 | 1.00 |  |
| 22.44      |     |     | N   |     |        |        |        |      |  |
| ATOM       | 305 | CA  | VAL | 25  | 32.115 | 5.472  | 18.905 | 1.00 |  |
| 15.37      |     |     | C   |     |        |        |        |      |  |
| ATOM       | 306 | C   | VAL | 25  | 31.142 | 5.793  | 20.029 | 1.00 |  |
| 17.47      |     |     | C   |     |        |        |        |      |  |
| ATOM       | 307 | O   | VAL | 25  | 31.412 | 5.530  | 21.201 | 1.00 |  |
| 29.52      |     |     | O   |     |        |        |        |      |  |
| ATOM       | 308 | CB  | VAL | 25  | 31.857 | 4.057  | 18.390 | 1.00 |  |

|            |     |      |     |    |        |       |        |      |   |
|------------|-----|------|-----|----|--------|-------|--------|------|---|
| 23.36      |     |      | C   |    |        |       |        |      |   |
| ATOM       | 309 | CG1  | VAL | 25 | 30.376 | 3.927 | 18.006 | 1.00 |   |
| 58.39      |     |      | C   |    |        |       |        |      |   |
| ATOM       | 310 | CG2  | VAL | 25 | 32.731 | 3.795 | 17.160 | 1.00 |   |
| 55.25      |     |      | C   |    |        |       |        |      |   |
| ATOM       | 311 | HN   | VAL | 25 | 34.080 | 4.844 | 19.400 | 1.00 |   |
| 48.11      |     |      | H   |    |        |       |        |      |   |
| ATOM       | 312 | HA   | VAL | 25 | 31.941 | 6.165 | 18.096 | 1.00 |   |
| 9.25       |     |      | H   |    |        |       |        |      |   |
| ATOM       | 313 | HB   | VAL | 25 | 32.093 | 3.341 | 19.165 | 1.00 |   |
| 52.45      |     |      | H   |    |        |       |        |      |   |
| ATOM       | 314 | HG11 | VAL | 25 | 29.786 | 3.779 | 18.897 |      |   |
| 1.00171.07 |     |      |     |    |        |       |        |      | H |
| ATOM       | 315 | HG12 | VAL | 25 | 30.244 | 3.084 | 17.344 |      |   |
| 1.00166.22 |     |      |     |    |        |       |        |      | H |
| ATOM       | 316 | HG13 | VAL | 25 | 30.051 | 4.832 | 17.507 |      |   |
| 1.00134.76 |     |      |     |    |        |       |        |      | H |
| ATOM       | 317 | HG21 | VAL | 25 | 32.742 | 2.735 | 16.946 |      |   |
| 1.00141.88 |     |      |     |    |        |       |        |      | H |
| ATOM       | 318 | HG22 | VAL | 25 | 33.737 | 4.135 | 17.354 |      |   |
| 1.00184.50 |     |      |     |    |        |       |        |      | H |
| ATOM       | 319 | HG23 | VAL | 25 | 32.327 | 4.328 | 16.313 |      |   |
| 1.00133.90 |     |      |     |    |        |       |        |      | H |
| ATOM       | 320 | N    | THR | 26 | 30.010 | 6.379 | 19.653 | 1.00 |   |
| 13.60      |     |      | N   |    |        |       |        |      |   |
| ATOM       | 321 | CA   | THR | 26 | 28.976 | 6.767 | 20.611 | 1.00 |   |
| 21.19      |     |      | C   |    |        |       |        |      |   |
| ATOM       | 322 | C    | THR | 26 | 27.625 | 6.169 | 20.228 | 1.00 |   |
| 16.55      |     |      | C   |    |        |       |        |      |   |
| ATOM       | 323 | O    | THR | 26 | 27.243 | 6.175 | 19.058 | 1.00 |   |
| 11.43      |     |      | O   |    |        |       |        |      |   |
| ATOM       | 324 | CB   | THR | 26 | 28.877 | 8.289 | 20.630 | 1.00 |   |
| 27.07      |     |      | C   |    |        |       |        |      |   |
| ATOM       | 325 | CG2  | THR | 26 | 27.750 | 8.728 | 21.568 | 1.00 |   |
| 44.39      |     |      | C   |    |        |       |        |      |   |
| ATOM       | 326 | OG1  | THR | 26 | 30.110 | 8.828 | 21.084 | 1.00 |   |
| 34.75      |     |      | O   |    |        |       |        |      |   |
| ATOM       | 327 | HN   | THR | 26 | 29.868 | 6.567 | 18.702 | 1.00 |   |
| 10.81      |     |      | H   |    |        |       |        |      |   |
| ATOM       | 328 | HA   | THR | 26 | 29.245 | 6.423 | 21.601 | 1.00 |   |
| 33.16      |     |      | H   |    |        |       |        |      |   |
| ATOM       | 329 | HB   | THR | 26 | 28.677 | 8.641 | 19.627 | 1.00 |   |
| 20.60      |     |      | H   |    |        |       |        |      |   |
| ATOM       | 330 | HG1  | THR | 26 | 30.820 | 8.357 | 20.641 | 1.00 |   |
| 77.72      |     |      | H   |    |        |       |        |      |   |
| ATOM       | 331 | HG21 | THR | 26 | 27.865 | 8.239 | 22.523 |      |   |
| 1.00126.99 |     |      |     |    |        |       |        |      | H |
| ATOM       | 332 | HG22 | THR | 26 | 26.796 | 8.461 | 21.140 |      |   |
| 1.00108.32 |     |      |     |    |        |       |        |      | H |
| ATOM       | 333 | HG23 | THR | 26 | 27.795 | 9.798 | 21.705 |      |   |
| 1.00151.99 |     |      |     |    |        |       |        |      | H |
| ATOM       | 334 | N    | ARG | 27 | 26.905 | 5.656 | 21.224 | 1.00 |   |

|            |     |      |     |    |        |        |        |      |  |
|------------|-----|------|-----|----|--------|--------|--------|------|--|
| 22.38      |     |      | N   |    |        |        |        |      |  |
| ATOM       | 335 | CA   | ARG | 27 | 25.592 | 5.057  | 20.988 | 1.00 |  |
| 20.21      |     |      | C   |    |        |        |        |      |  |
| ATOM       | 336 | C    | ARG | 27 | 24.695 | 5.229  | 22.210 | 1.00 |  |
| 16.96      |     |      | C   |    |        |        |        |      |  |
| ATOM       | 337 | O    | ARG | 27 | 25.179 | 5.479  | 23.315 | 1.00 |  |
| 20.06      |     |      | O   |    |        |        |        |      |  |
| ATOM       | 338 | CB   | ARG | 27 | 25.749 | 3.567  | 20.665 | 1.00 |  |
| 22.14      |     |      | C   |    |        |        |        |      |  |
| ATOM       | 339 | CG   | ARG | 27 | 26.313 | 2.832  | 21.883 |      |  |
| 1.00124.30 |     |      | C   |    |        |        |        |      |  |
| ATOM       | 340 | CD   | ARG | 27 | 26.642 | 1.388  | 21.499 |      |  |
| 1.00109.38 |     |      | C   |    |        |        |        |      |  |
| ATOM       | 341 | NE   | ARG | 27 | 27.138 | 0.658  | 22.660 |      |  |
| 1.00227.73 |     |      | N   |    |        |        |        |      |  |
| ATOM       | 342 | CZ   | ARG | 27 | 28.404 | 0.764  | 23.050 |      |  |
| 1.00426.12 |     |      | C   |    |        |        |        |      |  |
| ATOM       | 343 | NH1  | ARG | 27 | 28.825 | 0.097  | 24.091 |      |  |
| 1.00767.09 |     |      | N1+ |    |        |        |        |      |  |
| ATOM       | 344 | NH2  | ARG | 27 | 29.227 | 1.535  | 22.394 |      |  |
| 1.00581.78 |     |      | N   |    |        |        |        |      |  |
| ATOM       | 345 | HN   | ARG | 27 | 27.262 | 5.682  | 22.136 | 1.00 |  |
| 30.75      |     |      | H   |    |        |        |        |      |  |
| ATOM       | 346 | HA   | ARG | 27 | 25.125 | 5.547  | 20.145 | 1.00 |  |
| 23.13      |     |      | H   |    |        |        |        |      |  |
| ATOM       | 347 | HB1  | ARG | 27 | 26.424 | 3.449  | 19.831 | 1.00 |  |
| 87.46      |     |      | H   |    |        |        |        |      |  |
| ATOM       | 348 | HB2  | ARG | 27 | 24.785 | 3.152  | 20.408 |      |  |
| 1.00103.36 |     |      | H   |    |        |        |        |      |  |
| ATOM       | 349 | HG1  | ARG | 27 | 25.583 | 2.833  | 22.677 |      |  |
| 1.00281.97 |     |      | H   |    |        |        |        |      |  |
| ATOM       | 350 | HG2  | ARG | 27 | 27.212 | 3.330  | 22.219 |      |  |
| 1.00276.19 |     |      | H   |    |        |        |        |      |  |
| ATOM       | 351 | HD1  | ARG | 27 | 27.396 | 1.387  | 20.725 |      |  |
| 1.00183.60 |     |      | H   |    |        |        |        |      |  |
| ATOM       | 352 | HD2  | ARG | 27 | 25.750 | 0.905  | 21.130 |      |  |
| 1.00142.93 |     |      | H   |    |        |        |        |      |  |
| ATOM       | 353 | HE   | ARG | 27 | 26.526 | 0.078  | 23.162 |      |  |
| 1.00372.53 |     |      | H   |    |        |        |        |      |  |
| ATOM       | 354 | HH11 | ARG | 27 | 28.195 | -0.493 | 24.594 |      |  |
| 1.00910.59 |     |      | H   |    |        |        |        |      |  |
| ATOM       | 355 | HH12 | ARG | 27 | 29.778 | 0.176  | 24.383 |      |  |
| 1.00999.99 |     |      | H   |    |        |        |        |      |  |
| ATOM       | 356 | HH21 | ARG | 27 | 28.905 | 2.045  | 21.597 |      |  |
| 1.00532.54 |     |      | H   |    |        |        |        |      |  |
| ATOM       | 357 | HH22 | ARG | 27 | 30.180 | 1.614  | 22.685 |      |  |
| 1.00948.84 |     |      | H   |    |        |        |        |      |  |
| ATOM       | 358 | N    | SER | 28 | 23.385 | 5.099  | 22.005 | 1.00 |  |
| 14.60      |     |      | N   |    |        |        |        |      |  |
| ATOM       | 359 | CA   | SER | 28 | 22.427 | 5.247  | 23.099 | 1.00 |  |
| 14.92      |     |      | C   |    |        |        |        |      |  |
| ATOM       | 360 | C    | SER | 28 | 21.163 | 4.434  | 22.826 | 1.00 |  |

|            |     |     |     |    |        |       |        |      |  |
|------------|-----|-----|-----|----|--------|-------|--------|------|--|
| 12.12      |     |     | C   |    |        |       |        |      |  |
| ATOM       | 361 | O   | SER | 28 | 20.782 | 4.226 | 21.675 | 1.00 |  |
| 13.41      |     |     | O   |    |        |       |        |      |  |
| ATOM       | 362 | CB  | SER | 28 | 22.058 | 6.721 | 23.275 | 1.00 |  |
| 23.26      |     |     | C   |    |        |       |        |      |  |
| ATOM       | 363 | OG  | SER | 28 | 21.128 | 6.848 | 24.343 |      |  |
| 1.00146.32 |     |     |     | O  |        |       |        |      |  |
| ATOM       | 364 | HN  | SER | 28 | 23.057 | 4.902 | 21.103 | 1.00 |  |
| 15.23      |     |     | H   |    |        |       |        |      |  |
| ATOM       | 365 | HA  | SER | 28 | 22.877 | 4.892 | 24.015 | 1.00 |  |
| 15.44      |     |     | H   |    |        |       |        |      |  |
| ATOM       | 366 | HB1 | SER | 28 | 21.623 | 7.094 | 22.357 | 1.00 |  |
| 88.73      |     |     | H   |    |        |       |        |      |  |
| ATOM       | 367 | HB2 | SER | 28 | 22.944 | 7.290 | 23.507 |      |  |
| 1.00124.68 |     |     |     | H  |        |       |        |      |  |
| ATOM       | 368 | HG  | SER | 28 | 21.142 | 7.760 | 24.641 |      |  |
| 1.00242.47 |     |     |     | H  |        |       |        |      |  |
| ATOM       | 369 | N   | CYS | 29 | 20.519 | 3.984 | 23.898 | 1.00 |  |
| 10.48      |     |     | N   |    |        |       |        |      |  |
| ATOM       | 370 | CA  | CYS | 29 | 19.296 | 3.198 | 23.778 | 1.00 |  |
| 9.97       |     |     | C   |    |        |       |        |      |  |
| ATOM       | 371 | C   | CYS | 29 | 18.651 | 3.036 | 25.151 | 1.00 |  |
| 11.60      |     |     | C   |    |        |       |        |      |  |
| ATOM       | 372 | O   | CYS | 29 | 19.298 | 2.596 | 26.102 | 1.00 |  |
| 15.64      |     |     | O   |    |        |       |        |      |  |
| ATOM       | 373 | CB  | CYS | 29 | 19.612 | 1.820 | 23.174 | 1.00 |  |
| 9.52       |     |     | C   |    |        |       |        |      |  |
| ATOM       | 374 | SG  | CYS | 29 | 18.158 | 1.199 | 22.319 | 1.00 |  |
| 10.40      |     |     | S   |    |        |       |        |      |  |
| ATOM       | 375 | HN  | CYS | 29 | 20.868 | 4.191 | 24.789 | 1.00 |  |
| 11.10      |     |     | H   |    |        |       |        |      |  |
| ATOM       | 376 | HA  | CYS | 29 | 18.607 | 3.718 | 23.125 | 1.00 |  |
| 11.08      |     |     | H   |    |        |       |        |      |  |
| ATOM       | 377 | HB1 | CYS | 29 | 19.883 | 1.121 | 23.956 | 1.00 |  |
| 9.33       |     |     | H   |    |        |       |        |      |  |
| ATOM       | 378 | HB2 | CYS | 29 | 20.425 | 1.905 | 22.473 | 1.00 |  |
| 10.78      |     |     | H   |    |        |       |        |      |  |
| ATOM       | 379 | N   | GLU | 30 | 17.378 | 3.404 | 25.251 | 1.00 |  |
| 13.52      |     |     | N   |    |        |       |        |      |  |
| ATOM       | 380 | CA  | GLU | 30 | 16.660 | 3.305 | 26.519 | 1.00 |  |
| 17.41      |     |     | C   |    |        |       |        |      |  |
| ATOM       | 381 | C   | GLU | 30 | 16.086 | 1.907 | 26.714 | 1.00 |  |
| 10.81      |     |     | C   |    |        |       |        |      |  |
| ATOM       | 382 | O   | GLU | 30 | 15.789 | 1.204 | 25.749 | 1.00 |  |
| 23.22      |     |     | O   |    |        |       |        |      |  |
| ATOM       | 383 | CB  | GLU | 30 | 15.530 | 4.330 | 26.552 | 1.00 |  |
| 37.83      |     |     | C   |    |        |       |        |      |  |
| ATOM       | 384 | CG  | GLU | 30 | 16.117 | 5.733 | 26.392 |      |  |
| 1.00108.13 |     |     |     | C  |        |       |        |      |  |
| ATOM       | 385 | CD  | GLU | 30 | 16.940 | 6.097 | 27.622 |      |  |
| 1.00240.52 |     |     |     | C  |        |       |        |      |  |
| ATOM       | 386 | OE1 | GLU | 30 | 17.735 | 7.017 | 27.527 |      |  |

|            |     |     |     |     |    |        |        |        |      |
|------------|-----|-----|-----|-----|----|--------|--------|--------|------|
| 1.00422.56 |     |     |     | O   |    |        |        |        |      |
| ATOM       | 387 | OE2 | GLU |     | 30 | 16.763 | 5.450  | 28.642 |      |
| 1.00410.81 |     |     |     | O1- |    |        |        |        |      |
| ATOM       | 388 | HN  | GLU |     | 30 | 16.914 | 3.754  | 24.462 | 1.00 |
| 15.61      |     |     | H   |     |    |        |        |        |      |
| ATOM       | 389 | HA  | GLU |     | 30 | 17.342 | 3.517  | 27.329 | 1.00 |
| 24.60      |     |     | H   |     |    |        |        |        |      |
| ATOM       | 390 | HB1 | GLU |     | 30 | 15.009 | 4.265  | 27.495 | 1.00 |
| 72.67      |     |     | H   |     |    |        |        |        |      |
| ATOM       | 391 | HB2 | GLU |     | 30 | 14.840 | 4.132  | 25.743 | 1.00 |
| 56.47      |     |     | H   |     |    |        |        |        |      |
| ATOM       | 392 | HG1 | GLU |     | 30 | 15.317 | 6.446  | 26.273 |      |
| 1.00196.66 |     |     |     | H   |    |        |        |        |      |
| ATOM       | 393 | HG2 | GLU |     | 30 | 16.751 | 5.755  | 25.517 |      |
| 1.00140.67 |     |     |     | H   |    |        |        |        |      |
| ATOM       | 394 | N   | LYS |     | 31 | 15.926 | 1.512  | 27.978 | 1.00 |
| 11.96      |     |     | N   |     |    |        |        |        |      |
| ATOM       | 395 | CA  | LYS |     | 31 | 15.378 | 0.197  | 28.314 | 1.00 |
| 11.40      |     |     | C   |     |    |        |        |        |      |
| ATOM       | 396 | C   | LYS |     | 31 | 14.059 | 0.358  | 29.060 | 1.00 |
| 10.99      |     |     | C   |     |    |        |        |        |      |
| ATOM       | 397 | O   | LYS |     | 31 | 13.901 | 1.275  | 29.868 | 1.00 |
| 12.86      |     |     | O   |     |    |        |        |        |      |
| ATOM       | 398 | CB  | LYS |     | 31 | 16.364 | -0.572 | 29.193 | 1.00 |
| 21.40      |     |     | C   |     |    |        |        |        |      |
| ATOM       | 399 | CG  | LYS |     | 31 | 17.657 | -0.821 | 28.414 | 1.00 |
| 57.81      |     |     | C   |     |    |        |        |        |      |
| ATOM       | 400 | CD  | LYS |     | 31 | 18.640 | -1.601 | 29.289 |      |
| 1.00115.52 |     |     |     | C   |    |        |        |        |      |
| ATOM       | 401 | CE  | LYS |     | 31 | 19.923 | -1.870 | 28.503 |      |
| 1.00250.23 |     |     |     | C   |    |        |        |        |      |
| ATOM       | 402 | NZ  | LYS |     | 31 | 20.573 | -0.574 | 28.158 |      |
| 1.00462.10 |     |     |     | N1+ |    |        |        |        |      |
| ATOM       | 403 | HN  | LYS |     | 31 | 16.179 | 2.123  | 28.702 | 1.00 |
| 26.13      |     |     | H   |     |    |        |        |        |      |
| ATOM       | 404 | HA  | LYS |     | 31 | 15.201 | -0.369 | 27.409 | 1.00 |
| 13.87      |     |     | H   |     |    |        |        |        |      |
| ATOM       | 405 | HB1 | LYS |     | 31 | 15.931 | -1.519 | 29.477 | 1.00 |
| 37.63      |     |     | H   |     |    |        |        |        |      |
| ATOM       | 406 | HB2 | LYS |     | 31 | 16.580 | 0.006  | 30.079 | 1.00 |
| 47.19      |     |     | H   |     |    |        |        |        |      |
| ATOM       | 407 | HG1 | LYS |     | 31 | 18.098 | 0.124  | 28.136 |      |
| 1.00126.32 |     |     |     | H   |    |        |        |        |      |
| ATOM       | 408 | HG2 | LYS |     | 31 | 17.436 | -1.392 | 27.524 |      |
| 1.00114.19 |     |     |     | H   |    |        |        |        |      |
| ATOM       | 409 | HD1 | LYS |     | 31 | 18.194 | -2.541 | 29.581 |      |
| 1.00198.45 |     |     |     | H   |    |        |        |        |      |
| ATOM       | 410 | HD2 | LYS |     | 31 | 18.872 | -1.022 | 30.173 |      |
| 1.00200.14 |     |     |     | H   |    |        |        |        |      |
| ATOM       | 411 | HE1 | LYS |     | 31 | 19.685 | -2.406 | 27.597 |      |
| 1.00374.64 |     |     |     | H   |    |        |        |        |      |
| ATOM       | 412 | HE2 | LYS |     | 31 | 20.597 | -2.461 | 29.106 |      |



|            |     |      |     |   |    |        |        |        |      |  |
|------------|-----|------|-----|---|----|--------|--------|--------|------|--|
| 1.00403.27 |     |      |     | H |    |        |        |        |      |  |
| ATOM       | 413 | HZ1  | LYS |   | 31 | 19.920 | 0.001  | 27.591 |      |  |
| 1.00627.38 |     |      |     | H |    |        |        |        |      |  |
| ATOM       | 414 | HZ2  | LYS |   | 31 | 21.440 | -0.757 | 27.611 |      |  |
| 1.00622.26 |     |      |     | H |    |        |        |        |      |  |
| ATOM       | 415 | HZ3  | LYS |   | 31 | 20.815 | -0.063 | 29.030 |      |  |
| 1.00619.20 |     |      |     | H |    |        |        |        |      |  |
| ATOM       | 416 | N    | THR |   | 32 | 13.115 | -0.532 | 28.784 | 1.00 |  |
| 15.51      |     |      | N   |   |    |        |        |        |      |  |
| ATOM       | 417 | CA   | THR |   | 32 | 11.813 | -0.470 | 29.435 | 1.00 |  |
| 22.44      |     |      | C   |   |    |        |        |        |      |  |
| ATOM       | 418 | C    | THR |   | 32 | 11.928 | -0.879 | 30.900 | 1.00 |  |
| 26.60      |     |      | C   |   |    |        |        |        |      |  |
| ATOM       | 419 | O    | THR |   | 32 | 12.421 | -1.960 | 31.219 | 1.00 |  |
| 57.43      |     |      | O   |   |    |        |        |        |      |  |
| ATOM       | 420 | CB   | THR |   | 32 | 10.826 | -1.393 | 28.718 | 1.00 |  |
| 56.28      |     |      | C   |   |    |        |        |        |      |  |
| ATOM       | 421 | CG2  | THR |   | 32 | 9.461  | -1.315 | 29.402 |      |  |
| 1.00102.70 |     |      |     | C |    |        |        |        |      |  |
| ATOM       | 422 | OG1  | THR |   | 32 | 10.704 | -0.989 | 27.362 |      |  |
| 1.00111.17 |     |      |     | O |    |        |        |        |      |  |
| ATOM       | 423 | HN   | THR |   | 32 | 13.296 | -1.237 | 28.131 | 1.00 |  |
| 18.79      |     |      | H   |   |    |        |        |        |      |  |
| ATOM       | 424 | HA   | THR |   | 32 | 11.444 | 0.543  | 29.382 | 1.00 |  |
| 19.67      |     |      | H   |   |    |        |        |        |      |  |
| ATOM       | 425 | HB   | THR |   | 32 | 11.187 | -2.409 | 28.760 | 1.00 |  |
| 84.25      |     |      | H   |   |    |        |        |        |      |  |
| ATOM       | 426 | HG1  | THR |   | 32 | 11.237 | -1.580 | 26.826 |      |  |
| 1.00205.03 |     |      |     | H |    |        |        |        |      |  |
| ATOM       | 427 | HG21 | THR |   | 32 | 9.523  | -1.760 | 30.385 |      |  |
| 1.00220.71 |     |      |     | H |    |        |        |        |      |  |
| ATOM       | 428 | HG22 | THR |   | 32 | 8.731  | -1.849 | 28.811 |      |  |
| 1.00174.67 |     |      |     | H |    |        |        |        |      |  |
| ATOM       | 429 | HG23 | THR |   | 32 | 9.164  | -0.280 | 29.494 |      |  |
| 1.00217.44 |     |      |     | H |    |        |        |        |      |  |
| ATOM       | 430 | N    | THR |   | 33 | 11.467 | -0.002 | 31.784 | 1.00 |  |
| 22.47      |     |      | N   |   |    |        |        |        |      |  |
| ATOM       | 431 | CA   | THR |   | 33 | 11.514 | -0.267 | 33.219 | 1.00 |  |
| 41.60      |     |      | C   |   |    |        |        |        |      |  |
| ATOM       | 432 | C    | THR |   | 33 | 10.434 | 0.497  | 33.932 | 1.00 |  |
| 38.03      |     |      | C   |   |    |        |        |        |      |  |
| ATOM       | 433 | O    | THR |   | 33 | 10.639 | 1.620  | 34.391 | 1.00 |  |
| 52.73      |     |      | O   |   |    |        |        |        |      |  |
| ATOM       | 434 | CB   | THR |   | 33 | 12.882 | 0.111  | 33.791 | 1.00 |  |
| 63.25      |     |      | C   |   |    |        |        |        |      |  |
| ATOM       | 435 | CG2  | THR |   | 33 | 13.950 | -0.852 | 33.268 |      |  |
| 1.00121.65 |     |      |     | C |    |        |        |        |      |  |
| ATOM       | 436 | OG1  | THR |   | 33 | 13.205 | 1.438  | 33.398 | 1.00 |  |
| 96.20      |     |      | O   |   |    |        |        |        |      |  |
| ATOM       | 437 | HN   | THR |   | 33 | 11.085 | 0.842  | 31.466 | 1.00 |  |
| 23.82      |     |      | H   |   |    |        |        |        |      |  |
| ATOM       | 438 | HA   | THR |   | 33 | 11.333 | -1.310 | 33.399 | 1.00 |  |

|            |     |      |     |    |        |        |        |      |  |
|------------|-----|------|-----|----|--------|--------|--------|------|--|
| 67.12      |     |      | H   |    |        |        |        |      |  |
| ATOM       | 439 | HB   | THR | 33 | 12.848 | 0.053  | 34.868 |      |  |
| 1.00107.59 |     |      |     |    |        |        |        | H    |  |
| ATOM       | 440 | HG1  | THR | 33 | 13.684 | 1.392  | 32.568 |      |  |
| 1.00176.27 |     |      |     |    |        |        |        | H    |  |
| ATOM       | 441 | HG21 | THR | 33 | 14.157 | -0.632 | 32.231 |      |  |
| 1.00255.23 |     |      |     |    |        |        |        | H    |  |
| ATOM       | 442 | HG22 | THR | 33 | 13.596 | -1.867 | 33.357 |      |  |
| 1.00245.37 |     |      |     |    |        |        |        | H    |  |
| ATOM       | 443 | HG23 | THR | 33 | 14.855 | -0.734 | 33.847 |      |  |
| 1.00185.78 |     |      |     |    |        |        |        | H    |  |
| ATOM       | 444 | N    | GLY | 34 | 9.280  | -0.139 | 34.040 | 1.00 |  |
| 40.93      |     |      | N   |    |        |        |        |      |  |
| ATOM       | 445 | CA   | GLY | 34 | 8.168  | 0.473  | 34.720 | 1.00 |  |
| 45.59      |     |      | C   |    |        |        |        |      |  |
| ATOM       | 446 | C    | GLY | 34 | 7.567  | 1.597  | 33.883 | 1.00 |  |
| 40.97      |     |      | C   |    |        |        |        |      |  |
| ATOM       | 447 | O    | GLY | 34 | 6.351  | 1.675  | 33.711 | 1.00 |  |
| 82.17      |     |      | O   |    |        |        |        |      |  |
| ATOM       | 448 | HN   | GLY | 34 | 9.185  | -1.039 | 33.665 | 1.00 |  |
| 54.00      |     |      | H   |    |        |        |        |      |  |
| ATOM       | 449 | HA1  | GLY | 34 | 8.531  | 0.871  | 35.646 | 1.00 |  |
| 54.41      |     |      | H   |    |        |        |        |      |  |
| ATOM       | 450 | HA2  | GLY | 34 | 7.412  | -0.276 | 34.918 | 1.00 |  |
| 62.09      |     |      | H   |    |        |        |        |      |  |
| ATOM       | 451 | N    | ASN | 35 | 8.434  | 2.463  | 33.355 | 1.00 |  |
| 32.51      |     |      | N   |    |        |        |        |      |  |
| ATOM       | 452 | CA   | ASN | 35 | 7.993  | 3.584  | 32.523 | 1.00 |  |
| 33.20      |     |      | C   |    |        |        |        |      |  |
| ATOM       | 453 | C    | ASN | 35 | 8.875  | 3.701  | 31.284 | 1.00 |  |
| 23.17      |     |      | C   |    |        |        |        |      |  |
| ATOM       | 454 | O    | ASN | 35 | 10.094 | 3.545  | 31.361 | 1.00 |  |
| 27.01      |     |      | O   |    |        |        |        |      |  |
| ATOM       | 455 | CB   | ASN | 35 | 8.059  | 4.887  | 33.322 | 1.00 |  |
| 54.51      |     |      | C   |    |        |        |        |      |  |
| ATOM       | 456 | CG   | ASN | 35 | 7.241  | 4.763  | 34.593 | 1.00 |  |
| 80.73      |     |      | C   |    |        |        |        |      |  |
| ATOM       | 457 | ND2  | ASN | 35 | 5.970  | 4.511  | 34.511 |      |  |
| 1.00220.46 |     |      |     |    |        |        |        | N    |  |
| ATOM       | 458 | OD1  | ASN | 35 | 7.774  | 4.900  | 35.694 |      |  |
| 1.00117.80 |     |      |     |    |        |        |        | O    |  |
| ATOM       | 459 | HN   | ASN | 35 | 9.391  | 2.342  | 33.526 | 1.00 |  |
| 51.15      |     |      | H   |    |        |        |        |      |  |
| ATOM       | 460 | HA   | ASN | 35 | 6.971  | 3.421  | 32.207 | 1.00 |  |
| 47.21      |     |      | H   |    |        |        |        |      |  |
| ATOM       | 461 | HB1  | ASN | 35 | 7.670  | 5.694  | 32.722 | 1.00 |  |
| 68.31      |     |      | H   |    |        |        |        |      |  |
| ATOM       | 462 | HB2  | ASN | 35 | 9.080  | 5.093  | 33.583 | 1.00 |  |
| 57.75      |     |      | H   |    |        |        |        |      |  |
| ATOM       | 463 | HD21 | ASN | 35 | 5.546  | 4.403  | 33.636 |      |  |
| 1.00405.39 |     |      |     |    |        |        |        | H    |  |
| ATOM       | 464 | HD22 | ASN | 35 | 5.442  | 4.431  | 35.325 |      |  |

|            |     |     |     |    |        |        |        |      |  |   |
|------------|-----|-----|-----|----|--------|--------|--------|------|--|---|
| 1.00245.64 |     |     |     |    |        |        |        |      |  | H |
| ATOM       | 465 | N   | PHE | 36 | 8.251  | 3.972  | 30.143 | 1.00 |  |   |
| 35.72      |     |     | N   |    |        |        |        |      |  |   |
| ATOM       | 466 | CA  | PHE | 36 | 8.977  | 4.103  | 28.891 | 1.00 |  |   |
| 33.41      |     |     | C   |    |        |        |        |      |  |   |
| ATOM       | 467 | C   | PHE | 36 | 9.544  | 5.513  | 28.742 | 1.00 |  |   |
| 28.51      |     |     | C   |    |        |        |        |      |  |   |
| ATOM       | 468 | O   | PHE | 36 | 8.951  | 6.482  | 29.215 | 1.00 |  |   |
| 45.23      |     |     | O   |    |        |        |        |      |  |   |
| ATOM       | 469 | CB  | PHE | 36 | 8.029  | 3.807  | 27.735 | 1.00 |  |   |
| 67.53      |     |     | C   |    |        |        |        |      |  |   |
| ATOM       | 470 | CG  | PHE | 36 | 7.586  | 2.365  | 27.806 | 1.00 |  |   |
| 86.71      |     |     | C   |    |        |        |        |      |  |   |
| ATOM       | 471 | CD1 | PHE | 36 | 6.443  | 2.024  | 28.539 |      |  |   |
| 1.00106.51 |     |     |     |    |        |        |        |      |  | C |
| ATOM       | 472 | CD2 | PHE | 36 | 8.312  | 1.372  | 27.139 | 1.00 |  |   |
| 99.48      |     |     | C   |    |        |        |        |      |  |   |
| ATOM       | 473 | CE1 | PHE | 36 | 6.026  | 0.689  | 28.605 |      |  |   |
| 1.00134.48 |     |     |     |    |        |        |        |      |  | C |
| ATOM       | 474 | CE2 | PHE | 36 | 7.896  | 0.037  | 27.206 |      |  |   |
| 1.00134.27 |     |     |     |    |        |        |        |      |  | C |
| ATOM       | 475 | CZ  | PHE | 36 | 6.753  | -0.305 | 27.939 |      |  |   |
| 1.00149.48 |     |     |     |    |        |        |        |      |  | C |
| ATOM       | 476 | HN  | PHE | 36 | 7.280  | 4.081  | 30.140 | 1.00 |  |   |
| 62.87      |     |     | H   |    |        |        |        |      |  |   |
| ATOM       | 477 | HA  | PHE | 36 | 9.788  | 3.390  | 28.870 | 1.00 |  |   |
| 28.53      |     |     | H   |    |        |        |        |      |  |   |
| ATOM       | 478 | HB1 | PHE | 36 | 8.534  | 3.982  | 26.804 | 1.00 |  |   |
| 73.56      |     |     | H   |    |        |        |        |      |  |   |
| ATOM       | 479 | HB2 | PHE | 36 | 7.165  | 4.454  | 27.802 | 1.00 |  |   |
| 88.42      |     |     | H   |    |        |        |        |      |  |   |
| ATOM       | 480 | HD1 | PHE | 36 | 5.883  | 2.791  | 29.054 |      |  |   |
| 1.00110.20 |     |     |     |    |        |        |        |      |  | H |
| ATOM       | 481 | HD2 | PHE | 36 | 9.195  | 1.634  | 26.573 | 1.00 |  |   |
| 93.07      |     |     | H   |    |        |        |        |      |  |   |
| ATOM       | 482 | HE1 | PHE | 36 | 5.145  | 0.426  | 29.170 |      |  |   |
| 1.00155.06 |     |     |     |    |        |        |        |      |  | H |
| ATOM       | 483 | HE2 | PHE | 36 | 8.457  | -0.730 | 26.691 |      |  |   |
| 1.00159.46 |     |     |     |    |        |        |        |      |  | H |
| ATOM       | 484 | HZ  | PHE | 36 | 6.433  | -1.335 | 27.989 |      |  |   |
| 1.00183.25 |     |     |     |    |        |        |        |      |  | H |
| ATOM       | 485 | N   | THR | 37 | 10.695 | 5.621  | 28.076 | 1.00 |  |   |
| 20.06      |     |     | N   |    |        |        |        |      |  |   |
| ATOM       | 486 | CA  | THR | 37 | 11.345 | 6.913  | 27.862 | 1.00 |  |   |
| 27.18      |     |     | C   |    |        |        |        |      |  |   |
| ATOM       | 487 | C   | THR | 37 | 11.611 | 7.125  | 26.376 | 1.00 |  |   |
| 41.87      |     |     | C   |    |        |        |        |      |  |   |
| ATOM       | 488 | O   | THR | 37 | 10.822 | 6.711  | 25.526 |      |  |   |
| 1.00169.86 |     |     |     |    |        |        |        |      |  | O |
| ATOM       | 489 | CB  | THR | 37 | 12.666 | 6.968  | 28.631 | 1.00 |  |   |
| 26.52      |     |     | C   |    |        |        |        |      |  |   |
| ATOM       | 490 | CG2 | THR | 37 | 12.423 | 6.594  | 30.094 | 1.00 |  |   |

|            |     |      |     |    |        |        |        |      |     |
|------------|-----|------|-----|----|--------|--------|--------|------|-----|
| 75.69      |     |      | C   |    |        |        |        |      |     |
| ATOM       | 491 | OG1  | THR | 37 | 13.587 | 6.055  | 28.051 | 1.00 |     |
| 81.95      |     |      | O   |    |        |        |        |      |     |
| ATOM       | 492 | HN   | THR | 37 | 11.120 | 4.814  | 27.720 | 1.00 |     |
| 18.47      |     |      | H   |    |        |        |        |      |     |
| ATOM       | 493 | HA   | THR | 37 | 10.702 | 7.709  | 28.217 | 1.00 |     |
| 38.80      |     |      | H   |    |        |        |        |      |     |
| ATOM       | 494 | HB   | THR | 37 | 13.070 | 7.967  | 28.583 | 1.00 |     |
| 81.60      |     |      | H   |    |        |        |        |      |     |
| ATOM       | 495 | HG1  | THR | 37 | 13.129 | 5.571  | 27.359 |      |     |
| 1.00188.80 |     |      |     |    |        |        |        |      | H   |
| ATOM       | 496 | HG21 | THR | 37 | 12.108 | 5.561  | 30.153 |      |     |
| 1.00196.98 |     |      |     |    |        |        |        |      | H   |
| ATOM       | 497 | HG22 | THR | 37 | 11.653 | 7.229  | 30.505 |      |     |
| 1.00196.23 |     |      |     |    |        |        |        |      | H   |
| ATOM       | 498 | HG23 | THR | 37 | 13.336 | 6.723  | 30.655 |      |     |
| 1.00168.92 |     |      |     |    |        |        |        |      | H   |
| ATOM       | 499 | N    | GLU | 38 | 12.726 | 7.778  | 26.070 | 1.00 |     |
| 26.53      |     |      | N   |    |        |        |        |      |     |
| ATOM       | 500 | CA   | GLU | 38 | 13.090 | 8.047  | 24.681 | 1.00 |     |
| 30.29      |     |      | C   |    |        |        |        |      |     |
| ATOM       | 501 | C    | GLU | 38 | 14.597 | 8.269  | 24.555 | 1.00 |     |
| 25.39      |     |      | C   |    |        |        |        |      |     |
| ATOM       | 502 | O    | GLU | 38 | 15.222 | 8.859  | 25.435 | 1.00 |     |
| 51.60      |     |      | O   |    |        |        |        |      |     |
| ATOM       | 503 | CB   | GLU | 38 | 12.338 | 9.287  | 24.181 | 1.00 |     |
| 54.82      |     |      | C   |    |        |        |        |      |     |
| ATOM       | 504 | CG   | GLU | 38 | 12.642 | 9.533  | 22.696 |      |     |
| 1.00165.84 |     |      |     |    |        |        |        |      | C   |
| ATOM       | 505 | CD   | GLU | 38 | 12.136 | 8.366  | 21.855 |      |     |
| 1.00292.92 |     |      |     |    |        |        |        |      | C   |
| ATOM       | 506 | OE1  | GLU | 38 | 11.278 | 7.644  | 22.337 |      |     |
| 1.00414.19 |     |      |     |    |        |        |        |      | O   |
| ATOM       | 507 | OE2  | GLU | 38 | 12.613 | 8.213  | 20.743 |      |     |
| 1.00537.65 |     |      |     |    |        |        |        |      | O1- |
| ATOM       | 508 | HN   | GLU | 38 | 13.312 | 8.083  | 26.790 | 1.00 |     |
| 84.50      |     |      | H   |    |        |        |        |      |     |
| ATOM       | 509 | HA   | GLU | 38 | 12.811 | 7.199  | 24.073 | 1.00 |     |
| 32.15      |     |      | H   |    |        |        |        |      |     |
| ATOM       | 510 | HB1  | GLU | 38 | 12.647 | 10.149 | 24.754 |      |     |
| 1.00144.82 |     |      |     |    |        |        |        |      | H   |
| ATOM       | 511 | HB2  | GLU | 38 | 11.276 | 9.136  | 24.308 |      |     |
| 1.00106.49 |     |      |     |    |        |        |        |      | H   |
| ATOM       | 512 | HG1  | GLU | 38 | 13.707 | 9.639  | 22.557 |      |     |
| 1.00303.31 |     |      |     |    |        |        |        |      | H   |
| ATOM       | 513 | HG2  | GLU | 38 | 12.148 | 10.440 | 22.379 |      |     |
| 1.00323.99 |     |      |     |    |        |        |        |      | H   |
| ATOM       | 514 | N    | CYS | 39 | 15.168 | 7.797  | 23.452 | 1.00 |     |
| 15.84      |     |      | N   |    |        |        |        |      |     |
| ATOM       | 515 | CA   | CYS | 39 | 16.599 | 7.953  | 23.213 | 1.00 |     |
| 14.30      |     |      | C   |    |        |        |        |      |     |
| ATOM       | 516 | C    | CYS | 39 | 16.957 | 9.441  | 23.126 | 1.00 |     |

|            |     |     |     |    |        |        |        |      |
|------------|-----|-----|-----|----|--------|--------|--------|------|
| 22.31      |     |     | C   |    |        |        |        |      |
| ATOM       | 517 | O   | CYS | 39 | 16.134 | 10.249 | 22.697 | 1.00 |
| 32.92      |     |     | O   |    |        |        |        |      |
| ATOM       | 518 | CB  | CYS | 39 | 16.972 | 7.260  | 21.899 | 1.00 |
| 18.08      |     |     | C   |    |        |        |        |      |
| ATOM       | 519 | SG  | CYS | 39 | 15.870 | 7.846  | 20.587 | 1.00 |
| 17.41      |     |     | S   |    |        |        |        |      |
| ATOM       | 520 | HN  | CYS | 39 | 14.617 | 7.340  | 22.783 | 1.00 |
| 24.87      |     |     | H   |    |        |        |        |      |
| ATOM       | 521 | HA  | CYS | 39 | 17.141 | 7.489  | 24.020 | 1.00 |
| 14.60      |     |     | H   |    |        |        |        |      |
| ATOM       | 522 | HB1 | CYS | 39 | 16.867 | 6.193  | 22.011 | 1.00 |
| 27.71      |     |     | H   |    |        |        |        |      |
| ATOM       | 523 | HB2 | CYS | 39 | 17.994 | 7.498  | 21.645 | 1.00 |
| 34.91      |     |     | H   |    |        |        |        |      |
| ATOM       | 524 | N   | PRO | 40 | 18.153 | 9.826  | 23.515 | 1.00 |
| 27.27      |     |     | N   |    |        |        |        |      |
| ATOM       | 525 | CA  | PRO | 40 | 18.582 | 11.255 | 23.462 | 1.00 |
| 47.66      |     |     | C   |    |        |        |        |      |
| ATOM       | 526 | C   | PRO | 40 | 18.919 | 11.692 | 22.038 | 1.00 |
| 71.54      |     |     | C   |    |        |        |        |      |
| ATOM       | 527 | O   | PRO | 40 | 19.601 | 10.980 | 21.303 | 1.00 |
| 87.70      |     |     | O   |    |        |        |        |      |
| ATOM       | 528 | CB  | PRO | 40 | 19.826 | 11.280 | 24.358 | 1.00 |
| 53.85      |     |     | C   |    |        |        |        |      |
| ATOM       | 529 | CG  | PRO | 40 | 20.416 | 9.916  | 24.209 | 1.00 |
| 46.04      |     |     | C   |    |        |        |        |      |
| ATOM       | 530 | CD  | PRO | 40 | 19.227 | 8.963  | 24.042 | 1.00 |
| 25.70      |     |     | C   |    |        |        |        |      |
| ATOM       | 531 | HA  | PRO | 40 | 17.821 | 11.891 | 23.880 | 1.00 |
| 58.04      |     |     | H   |    |        |        |        |      |
| ATOM       | 532 | HB1 | PRO | 40 | 19.544 | 11.452 | 25.386 | 1.00 |
| 67.93      |     |     | H   |    |        |        |        |      |
| ATOM       | 533 | HB2 | PRO | 40 | 20.523 | 12.040 | 24.025 | 1.00 |
| 70.99      |     |     | H   |    |        |        |        |      |
| ATOM       | 534 | HG1 | PRO | 40 | 20.978 | 9.650  | 25.093 | 1.00 |
| 65.91      |     |     | H   |    |        |        |        |      |
| ATOM       | 535 | HG2 | PRO | 40 | 21.054 | 9.882  | 23.334 | 1.00 |
| 54.99      |     |     | H   |    |        |        |        |      |
| ATOM       | 536 | HD1 | PRO | 40 | 18.938 | 8.545  | 24.994 | 1.00 |
| 24.22      |     |     | H   |    |        |        |        |      |
| ATOM       | 537 | HD2 | PRO | 40 | 19.465 | 8.181  | 23.335 | 1.00 |
| 26.94      |     |     | H   |    |        |        |        |      |
| ATOM       | 538 | N   | GLY | 41 | 18.438 | 12.869 | 21.661 |      |
| 1.00105.24 |     |     |     | N  |        |        |        |      |
| ATOM       | 539 | CA  | GLY | 41 | 18.698 | 13.396 | 20.327 |      |
| 1.00147.55 |     |     |     | C  |        |        |        |      |
| ATOM       | 540 | C   | GLY | 41 | 20.189 | 13.627 | 20.120 |      |
| 1.00161.74 |     |     |     | C  |        |        |        |      |
| ATOM       | 541 | O   | GLY | 41 | 20.740 | 13.305 | 19.068 |      |
| 1.00244.37 |     |     |     | O  |        |        |        |      |
| ATOM       | 542 | HN  | GLY | 41 | 17.905 | 13.393 | 22.293 |      |

|            |     |      |     |   |    |        |        |        |
|------------|-----|------|-----|---|----|--------|--------|--------|
| 1.00121.79 |     |      |     | H |    |        |        |        |
| ATOM       | 543 | HA1  | GLY | H | 41 | 18.175 | 14.331 | 20.204 |
| 1.00184.40 |     |      |     | H |    |        |        |        |
| ATOM       | 544 | HA2  | GLY | H | 41 | 18.343 | 12.691 | 19.593 |
| 1.00157.34 |     |      |     | H |    |        |        |        |
| ATOM       | 545 | N    | LEU | H | 42 | 20.834 | 14.186 | 21.141 |
| 1.00162.48 |     |      |     | N |    |        |        |        |
| ATOM       | 546 | CA   | LEU | N | 42 | 22.273 | 14.467 | 21.094 |
| 1.00191.48 |     |      |     | C |    |        |        |        |
| ATOM       | 547 | C    | LEU | C | 42 | 22.962 | 13.863 | 22.314 |
| 1.00166.66 |     |      |     | C |    |        |        |        |
| ATOM       | 548 | O    | LEU | C | 42 | 22.432 | 13.914 | 23.423 |
| 1.00251.38 |     |      |     | O |    |        |        |        |
| ATOM       | 549 | CB   | LEU | O | 42 | 22.507 | 15.979 | 21.080 |
| 1.00307.99 |     |      |     | C |    |        |        |        |
| ATOM       | 550 | CG   | LEU | C | 42 | 21.794 | 16.615 | 19.880 |
| 1.00452.28 |     |      |     | C |    |        |        |        |
| ATOM       | 551 | CD1  | LEU | C | 42 | 21.942 | 18.137 | 19.958 |
| 1.00681.24 |     |      |     | C |    |        |        |        |
| ATOM       | 552 | CD2  | LEU | C | 42 | 22.415 | 16.106 | 18.565 |
| 1.00527.46 |     |      |     | C |    |        |        |        |
| ATOM       | 553 | HN   | LEU | C | 42 | 20.331 | 14.411 | 21.949 |
| 1.00195.47 |     |      |     | H |    |        |        |        |
| ATOM       | 554 | HA   | LEU | H | 42 | 22.703 | 14.034 | 20.202 |
| 1.00229.77 |     |      |     | H |    |        |        |        |
| ATOM       | 555 | HB1  | LEU | H | 42 | 23.567 | 16.178 | 21.013 |
| 1.00342.49 |     |      |     | H |    |        |        |        |
| ATOM       | 556 | HB2  | LEU | H | 42 | 22.120 | 16.408 | 21.993 |
| 1.00335.33 |     |      |     | H |    |        |        |        |
| ATOM       | 557 | HG   | LEU | H | 42 | 20.745 | 16.355 | 19.909 |
| 1.00427.79 |     |      |     | H |    |        |        |        |
| ATOM       | 558 | HD11 | LEU | H | 42 | 21.284 | 18.601 | 19.240 |
| 1.00909.71 |     |      |     | H |    |        |        |        |
| ATOM       | 559 | HD12 | LEU | H | 42 | 22.964 | 18.412 | 19.741 |
| 1.00706.80 |     |      |     | H |    |        |        |        |
| ATOM       | 560 | HD13 | LEU | H | 42 | 21.683 | 18.472 | 20.952 |
| 1.00858.82 |     |      |     | H |    |        |        |        |
| ATOM       | 561 | HD21 | LEU | H | 42 | 23.483 | 15.998 | 18.683 |
| 1.00631.69 |     |      |     | H |    |        |        |        |
| ATOM       | 562 | HD22 | LEU | H | 42 | 22.213 | 16.811 | 17.771 |
| 1.00628.06 |     |      |     | H |    |        |        |        |
| ATOM       | 563 | HD23 | LEU | H | 42 | 21.982 | 15.153 | 18.308 |
| 1.00656.75 |     |      |     | H |    |        |        |        |
| ATOM       | 564 | N    | THR | H | 43 | 24.150 | 13.294 | 22.104 |
| 1.00178.52 |     |      |     | N |    |        |        |        |
| ATOM       | 565 | CA   | THR | N | 43 | 24.911 | 12.683 | 23.199 |
| 1.00240.84 |     |      |     | C |    |        |        |        |
| ATOM       | 566 | C    | THR | C | 43 | 26.159 | 13.526 | 23.515 |
| 1.00372.31 |     |      |     | C |    |        |        |        |
| ATOM       | 567 | O    | THR | C | 43 | 27.042 | 13.651 | 22.667 |
| 1.00500.13 |     |      |     | O |    |        |        |        |
| ATOM       | 568 | CB   | THR | O | 43 | 25.361 | 11.281 | 22.797 |

|            |     |      |     |    |        |        |        |  |
|------------|-----|------|-----|----|--------|--------|--------|--|
| 1.00354.13 |     |      |     | C  |        |        |        |  |
| ATOM       | 569 | CG2  | THR | 43 | 26.039 | 10.602 | 23.988 |  |
| 1.00463.04 |     |      |     | C  |        |        |        |  |
| ATOM       | 570 | OG1  | THR | 43 | 24.232 | 10.518 | 22.396 |  |
| 1.00508.50 |     |      |     | O  |        |        |        |  |
| ATOM       | 571 | HN   | THR | 43 | 24.526 | 13.284 | 21.199 |  |
| 1.00229.59 |     |      |     | H  |        |        |        |  |
| ATOM       | 572 | HA   | THR | 43 | 24.282 | 12.600 | 24.068 |  |
| 1.00249.90 |     |      |     | H  |        |        |        |  |
| ATOM       | 573 | HB   | THR | 43 | 26.061 | 11.352 | 21.987 |  |
| 1.00481.58 |     |      |     | H  |        |        |        |  |
| ATOM       | 574 | HG1  | THR | 43 | 23.970 | 10.814 | 21.521 |  |
| 1.00624.31 |     |      |     | H  |        |        |        |  |
| ATOM       | 575 | HG21 | THR | 43 | 26.949 | 11.128 | 24.232 |  |
| 1.00650.95 |     |      |     | H  |        |        |        |  |
| ATOM       | 576 | HG22 | THR | 43 | 26.271 | 9.579  | 23.734 |  |
| 1.00580.73 |     |      |     | H  |        |        |        |  |
| ATOM       | 577 | HG23 | THR | 43 | 25.374 | 10.619 | 24.840 |  |
| 1.00571.99 |     |      |     | H  |        |        |        |  |
| ATOM       | 578 | N    | PRO | 44 | 26.268 | 14.103 | 24.694 |  |
| 1.00488.39 |     |      |     | N  |        |        |        |  |
| ATOM       | 579 | CA   | PRO | 44 | 27.451 | 14.931 | 25.069 |  |
| 1.00760.13 |     |      |     | C  |        |        |        |  |
| ATOM       | 580 | C    | PRO | 44 | 28.621 | 14.074 | 25.550 |  |
| 1.00735.36 |     |      |     | C  |        |        |        |  |
| ATOM       | 581 | O    | PRO | 44 | 29.028 | 14.160 | 26.710 |  |
| 1.00999.99 |     |      |     | O  |        |        |        |  |
| ATOM       | 582 | CB   | PRO | 44 | 26.905 | 15.803 | 26.201 |  |
| 1.00999.99 |     |      |     | C  |        |        |        |  |
| ATOM       | 583 | CG   | PRO | 44 | 25.916 | 14.923 | 26.895 |  |
| 1.00856.94 |     |      |     | C  |        |        |        |  |
| ATOM       | 584 | CD   | PRO | 44 | 25.295 | 14.039 | 25.803 |  |
| 1.00548.09 |     |      |     | C  |        |        |        |  |
| ATOM       | 585 | HA   | PRO | 44 | 27.752 | 15.554 | 24.243 |  |
| 1.00939.00 |     |      |     | H  |        |        |        |  |
| ATOM       | 586 | HB1  | PRO | 44 | 26.408 | 16.673 | 25.798 |  |
| 1.00999.99 |     |      |     | H  |        |        |        |  |
| ATOM       | 587 | HB2  | PRO | 44 | 27.701 | 16.099 | 26.874 |  |
| 1.00999.99 |     |      |     | H  |        |        |        |  |
| ATOM       | 588 | HG1  | PRO | 44 | 25.149 | 15.517 | 27.368 |  |
| 1.00999.99 |     |      |     | H  |        |        |        |  |
| ATOM       | 589 | HG2  | PRO | 44 | 26.422 | 14.311 | 27.633 |  |
| 1.00853.53 |     |      |     | H  |        |        |        |  |
| ATOM       | 590 | HD1  | PRO | 44 | 24.344 | 14.438 | 25.485 |  |
| 1.00602.45 |     |      |     | H  |        |        |        |  |
| ATOM       | 591 | HD2  | PRO | 44 | 25.187 | 13.018 | 26.149 |  |
| 1.00463.32 |     |      |     | H  |        |        |        |  |
| ATOM       | 592 | N    | ILE | 45 | 29.157 | 13.247 | 24.658 |  |
| 1.00518.33 |     |      |     | N  |        |        |        |  |
| ATOM       | 593 | CA   | ILE | 45 | 30.277 | 12.383 | 25.015 |  |
| 1.00582.79 |     |      |     | C  |        |        |        |  |
| ATOM       | 594 | C    | ILE | 45 | 31.533 | 13.210 | 25.273 |  |

|            |     |      |     |    |        |        |        |  |
|------------|-----|------|-----|----|--------|--------|--------|--|
| 1.00795.93 |     |      |     | C  |        |        |        |  |
| ATOM       | 595 | O    | ILE | 45 | 31.796 | 14.193 | 24.579 |  |
| 1.00898.75 |     |      |     | O  |        |        |        |  |
| ATOM       | 596 | CB   | ILE | 45 | 30.548 | 11.381 | 23.893 |  |
| 1.00474.41 |     |      |     | C  |        |        |        |  |
| ATOM       | 597 | CG1  | ILE | 45 | 31.629 | 10.395 | 24.344 |  |
| 1.00516.90 |     |      |     | C  |        |        |        |  |
| ATOM       | 598 | CG2  | ILE | 45 | 31.027 | 12.126 | 22.644 |  |
| 1.00760.75 |     |      |     | C  |        |        |        |  |
| ATOM       | 599 | CD1  | ILE | 45 | 31.699 | 9.225  | 23.361 |  |
| 1.00566.81 |     |      |     | C  |        |        |        |  |
| ATOM       | 600 | HN   | ILE | 45 | 28.794 | 13.217 | 23.749 |  |
| 1.00395.72 |     |      |     | H  |        |        |        |  |
| ATOM       | 601 | HA   | ILE | 45 | 30.027 | 11.841 | 25.913 |  |
| 1.00711.06 |     |      |     | H  |        |        |        |  |
| ATOM       | 602 | HB   | ILE | 45 | 29.639 | 10.842 | 23.663 |  |
| 1.00477.81 |     |      |     | H  |        |        |        |  |
| ATOM       | 603 | HG11 | ILE | 45 | 31.388 | 10.022 | 25.327 |  |
| 1.00624.28 |     |      |     | H  |        |        |        |  |
| ATOM       | 604 | HG12 | ILE | 45 | 32.584 | 10.898 | 24.374 |  |
| 1.00744.84 |     |      |     | H  |        |        |        |  |
| ATOM       | 605 | HG21 | ILE | 45 | 31.013 | 11.455 | 21.798 |  |
| 1.00920.57 |     |      |     | H  |        |        |        |  |
| ATOM       | 606 | HG22 | ILE | 45 | 32.034 | 12.484 | 22.804 |  |
| 1.00999.99 |     |      |     | H  |        |        |        |  |
| ATOM       | 607 | HG23 | ILE | 45 | 30.373 | 12.963 | 22.452 |  |
| 1.00865.46 |     |      |     | H  |        |        |        |  |
| ATOM       | 608 | HD11 | ILE | 45 | 31.923 | 9.598  | 22.374 |  |
| 1.00658.89 |     |      |     | H  |        |        |        |  |
| ATOM       | 609 | HD12 | ILE | 45 | 30.750 | 8.710  | 23.346 |  |
| 1.00734.30 |     |      |     | H  |        |        |        |  |
| ATOM       | 610 | HD13 | ILE | 45 | 32.473 | 8.540  | 23.672 |  |
| 1.00675.84 |     |      |     | H  |        |        |        |  |
| ATOM       | 611 | N    | ALA | 46 | 32.307 | 12.802 | 26.275 |  |
| 1.00999.99 |     |      |     | N  |        |        |        |  |
| ATOM       | 612 | CA   | ALA | 46 | 33.535 | 13.512 | 26.617 |  |
| 1.00999.99 |     |      |     | C  |        |        |        |  |
| ATOM       | 613 | C    | ALA | 46 | 34.332 | 12.729 | 27.654 |  |
| 1.00999.99 |     |      |     | C  |        |        |        |  |
| ATOM       | 614 | CB   | ALA | 46 | 33.200 | 14.898 | 27.168 |  |
| 1.00999.99 |     |      |     | C  |        |        |        |  |
| ATOM       | 615 | OT1  | ALA | 46 | 35.492 | 12.451 | 27.395 |  |
| 1.00999.99 |     |      |     | O  |        |        |        |  |
| ATOM       | 616 | OT2  | ALA | 46 | 33.773 | 12.416 | 28.692 |  |
| 1.00999.99 |     |      |     | O  |        |        |        |  |
| ATOM       | 617 | HN   | ALA | 46 | 32.047 | 12.012 | 26.792 |  |
| 1.00999.99 |     |      |     | H  |        |        |        |  |
| ATOM       | 618 | HA   | ALA | 46 | 34.133 | 13.625 | 25.726 |  |
| 1.00999.99 |     |      |     | H  |        |        |        |  |
| ATOM       | 619 | HB1  | ALA | 46 | 32.504 | 14.802 | 27.989 |  |
| 1.00999.99 |     |      |     | H  |        |        |        |  |
| ATOM       | 620 | HB2  | ALA | 46 | 32.756 | 15.498 | 26.387 |  |



|            |     |      |     |   |    |        |        |        |
|------------|-----|------|-----|---|----|--------|--------|--------|
| 1.00999.99 |     |      |     |   |    |        |        |        |
| ATOM       | 621 | HB3  | ALA | H | 46 | 34.105 | 15.374 | 27.518 |
| 1.00999.99 |     |      |     | H |    |        |        |        |
| ENDMDL     |     |      |     |   |    |        |        |        |
| TER        |     |      |     |   |    |        |        |        |
| MODEL      | 17  |      |     |   |    |        |        |        |
| ATOM       | 1   | N    | GLY |   | 1  | 26.097 | -3.915 | 15.312 |
| 1.00999.99 |     |      |     | N |    |        |        |        |
| ATOM       | 2   | CA   | GLY |   | 1  | 25.979 | -2.924 | 16.418 |
| 1.00999.99 |     |      |     | C |    |        |        |        |
| ATOM       | 3   | C    | GLY |   | 1  | 25.032 | -1.804 | 16.002 |
| 1.00999.99 |     |      |     | C |    |        |        |        |
| ATOM       | 4   | O    | GLY |   | 1  | 24.700 | -0.930 | 16.801 |
| 1.00999.99 |     |      |     | O |    |        |        |        |
| ATOM       | 5   | HA1  | GLY |   | 1  | 26.952 | -2.506 | 16.632 |
| 1.00999.99 |     |      |     | H |    |        |        |        |
| ATOM       | 6   | HA2  | GLY |   | 1  | 25.595 | -3.413 | 17.302 |
| 1.00999.99 |     |      |     | H |    |        |        |        |
| ATOM       | 7   | HT1  | GLY |   | 1  | 27.093 | -4.193 | 15.198 |
| 1.00999.99 |     |      |     | H |    |        |        |        |
| ATOM       | 8   | HT2  | GLY |   | 1  | 25.752 | -3.491 | 14.427 |
| 1.00999.99 |     |      |     | H |    |        |        |        |
| ATOM       | 9   | HT3  | GLY |   | 1  | 25.529 | -4.756 | 15.538 |
| 1.00999.99 |     |      |     | H |    |        |        |        |
| ATOM       | 10  | N    | LEU |   | 2  | 24.601 | -1.839 | 14.745 |
| 1.00999.99 |     |      |     | N |    |        |        |        |
| ATOM       | 11  | CA   | LEU |   | 2  | 23.690 | -0.822 | 14.232 |
| 1.00895.59 |     |      |     | C |    |        |        |        |
| ATOM       | 12  | C    | LEU |   | 2  | 22.272 | -1.077 | 14.735 |
| 1.00532.27 |     |      |     | C |    |        |        |        |
| ATOM       | 13  | O    | LEU |   | 2  | 21.884 | -2.222 | 14.966 |
| 1.00625.21 |     |      |     | O |    |        |        |        |
| ATOM       | 14  | CB   | LEU |   | 2  | 23.697 | -0.834 | 12.701 |
| 1.00999.99 |     |      |     | C |    |        |        |        |
| ATOM       | 15  | CG   | LEU |   | 2  | 25.124 | -0.618 | 12.180 |
| 1.00999.99 |     |      |     | C |    |        |        |        |
| ATOM       | 16  | CD1  | LEU |   | 2  | 25.115 | -0.703 | 10.650 |
| 1.00999.99 |     |      |     | C |    |        |        |        |
| ATOM       | 17  | CD2  | LEU |   | 2  | 25.645 | 0.761  | 12.619 |
| 1.00999.99 |     |      |     | C |    |        |        |        |
| ATOM       | 18  | HN   | LEU |   | 2  | 24.898 | -2.560 | 14.153 |
| 1.00999.99 |     |      |     | H |    |        |        |        |
| ATOM       | 19  | HA   | LEU |   | 2  | 24.012 | 0.148  | 14.578 |
| 1.00890.87 |     |      |     | H |    |        |        |        |
| ATOM       | 20  | HB1  | LEU |   | 2  | 23.059 | -0.044 | 12.334 |
| 1.00924.07 |     |      |     | H |    |        |        |        |
| ATOM       | 21  | HB2  | LEU |   | 2  | 23.326 | -1.786 | 12.350 |
| 1.00999.99 |     |      |     | H |    |        |        |        |
| ATOM       | 22  | HG   | LEU |   | 2  | 25.768 | -1.391 | 12.576 |
| 1.00999.99 |     |      |     | H |    |        |        |        |
| ATOM       | 23  | HD11 | LEU |   | 2  | 24.558 | 0.130  | 10.247 |
| 1.00999.99 |     |      |     | H |    |        |        |        |

|            |    |      |     |   |        |        |        |      |
|------------|----|------|-----|---|--------|--------|--------|------|
| ATOM       | 24 | HD12 | LEU | 2 | 24.652 | -1.628 | 10.343 |      |
| 1.00999.99 |    |      |     |   |        |        |        | H    |
| ATOM       | 25 | HD13 | LEU | 2 | 26.130 | -0.669 | 10.283 |      |
| 1.00999.99 |    |      |     |   |        |        |        | H    |
| ATOM       | 26 | HD21 | LEU | 2 | 26.428 | 1.087  | 11.948 |      |
| 1.00999.99 |    |      |     |   |        |        |        | H    |
| ATOM       | 27 | HD22 | LEU | 2 | 26.046 | 0.693  | 13.620 |      |
| 1.00999.99 |    |      |     |   |        |        |        | H    |
| ATOM       | 28 | HD23 | LEU | 2 | 24.837 | 1.481  | 12.603 |      |
| 1.00999.99 |    |      |     |   |        |        |        | H    |
| ATOM       | 29 | N    | CYS | 3 | 21.501 | -0.006 | 14.902 |      |
| 1.00271.28 |    |      |     |   |        |        |        | N    |
| ATOM       | 30 | CA   | CYS | 3 | 20.129 | -0.139 | 15.379 |      |
| 1.00104.50 |    |      |     |   |        |        |        | C    |
| ATOM       | 31 | C    | CYS | 3 | 19.297 | -0.955 | 14.398 | 1.00 |
| 90.98      |    |      | C   |   |        |        |        |      |
| ATOM       | 32 | O    | CYS | 3 | 18.487 | -1.790 | 14.799 |      |
| 1.00207.28 |    |      |     |   |        |        |        | O    |
| ATOM       | 33 | CB   | CYS | 3 | 19.496 | 1.241  | 15.565 | 1.00 |
| 37.83      |    |      | C   |   |        |        |        |      |
| ATOM       | 34 | SG   | CYS | 3 | 20.239 | 2.066  | 16.995 | 1.00 |
| 81.56      |    |      | S   |   |        |        |        |      |
| ATOM       | 35 | HN   | CYS | 3 | 21.860 | 0.883  | 14.703 |      |
| 1.00296.55 |    |      |     |   |        |        |        | H    |
| ATOM       | 36 | HA   | CYS | 3 | 20.142 | -0.644 | 16.328 |      |
| 1.00166.45 |    |      |     |   |        |        |        | H    |
| ATOM       | 37 | HB1  | CYS | 3 | 18.434 | 1.131  | 15.727 | 1.00 |
| 40.38      |    |      | H   |   |        |        |        |      |
| ATOM       | 38 | HB2  | CYS | 3 | 19.664 | 1.837  | 14.680 | 1.00 |
| 98.45      |    |      | H   |   |        |        |        |      |
| ATOM       | 39 | N    | SER | 4 | 19.500 | -0.710 | 13.109 | 1.00 |
| 85.31      |    |      | N   |   |        |        |        |      |
| ATOM       | 40 | CA   | SER | 4 | 18.760 | -1.428 | 12.074 | 1.00 |
| 92.94      |    |      | C   |   |        |        |        |      |
| ATOM       | 41 | C    | SER | 4 | 17.329 | -0.910 | 11.982 | 1.00 |
| 67.37      |    |      | C   |   |        |        |        |      |
| ATOM       | 42 | O    | SER | 4 | 16.724 | -0.904 | 10.910 |      |
| 1.00102.28 |    |      |     |   |        |        |        | O    |
| ATOM       | 43 | CB   | SER | 4 | 18.741 | -2.931 | 12.388 |      |
| 1.00123.83 |    |      |     |   |        |        |        | C    |
| ATOM       | 44 | OG   | SER | 4 | 18.690 | -3.663 | 11.171 |      |
| 1.00178.89 |    |      |     |   |        |        |        | O    |
| ATOM       | 45 | HN   | SER | 4 | 20.159 | -0.034 | 12.851 |      |
| 1.00163.03 |    |      |     |   |        |        |        | H    |
| ATOM       | 46 | HA   | SER | 4 | 19.250 | -1.277 | 11.124 |      |
| 1.00129.78 |    |      |     |   |        |        |        | H    |
| ATOM       | 47 | HB1  | SER | 4 | 17.874 | -3.168 | 13.000 |      |
| 1.00105.26 |    |      |     |   |        |        |        | H    |
| ATOM       | 48 | HB2  | SER | 4 | 19.637 | -3.199 | 12.924 |      |
| 1.00156.87 |    |      |     |   |        |        |        | H    |
| ATOM       | 49 | HG   | SER | 4 | 17.801 | -4.010 | 11.070 |      |
| 1.00218.16 |    |      |     |   |        |        |        | H    |

|            |    |     |     |   |        |        |        |      |
|------------|----|-----|-----|---|--------|--------|--------|------|
| ATOM       | 50 | N   | GLU | 5 | 16.790 | -0.494 | 13.123 | 1.00 |
| 41.67      |    |     | N   |   |        |        |        |      |
| ATOM       | 51 | CA  | GLU | 5 | 15.422 | 0.008  | 13.185 | 1.00 |
| 41.21      |    |     | C   |   |        |        |        |      |
| ATOM       | 52 | C   | GLU | 5 | 15.277 | 1.034  | 14.305 | 1.00 |
| 41.92      |    |     | C   |   |        |        |        |      |
| ATOM       | 53 | O   | GLU | 5 | 16.167 | 1.183  | 15.139 | 1.00 |
| 74.72      |    |     | O   |   |        |        |        |      |
| ATOM       | 54 | CB  | GLU | 5 | 14.464 | -1.157 | 13.416 | 1.00 |
| 49.24      |    |     | C   |   |        |        |        |      |
| ATOM       | 55 | CG  | GLU | 5 | 14.867 | -1.882 | 14.693 | 1.00 |
| 55.48      |    |     | C   |   |        |        |        |      |
| ATOM       | 56 | CD  | GLU | 5 | 14.062 | -3.168 | 14.843 | 1.00 |
| 92.06      |    |     | C   |   |        |        |        |      |
| ATOM       | 57 | OE1 | GLU | 5 | 13.249 | -3.440 | 13.975 |      |
| 1.00206.49 |    |     | O   |   |        |        |        |      |
| ATOM       | 58 | OE2 | GLU | 5 | 14.272 | -3.864 | 15.823 |      |
| 1.00197.24 |    |     | O1- |   |        |        |        |      |
| ATOM       | 59 | HN  | GLU | 5 | 17.321 | -0.538 | 13.945 | 1.00 |
| 45.52      |    |     | H   |   |        |        |        |      |
| ATOM       | 60 | HA  | GLU | 5 | 15.175 | 0.473  | 12.252 | 1.00 |
| 60.63      |    |     | H   |   |        |        |        |      |
| ATOM       | 61 | HB1 | GLU | 5 | 14.518 | -1.842 | 12.583 | 1.00 |
| 61.59      |    |     | H   |   |        |        |        |      |
| ATOM       | 62 | HB2 | GLU | 5 | 13.459 | -0.784 | 13.513 | 1.00 |
| 63.66      |    |     | H   |   |        |        |        |      |
| ATOM       | 63 | HG1 | GLU | 5 | 14.683 | -1.243 | 15.542 | 1.00 |
| 58.03      |    |     | H   |   |        |        |        |      |
| ATOM       | 64 | HG2 | GLU | 5 | 15.916 | -2.115 | 14.641 | 1.00 |
| 57.77      |    |     | H   |   |        |        |        |      |
| ATOM       | 65 | N   | ASN | 6 | 14.155 | 1.743  | 14.313 | 1.00 |
| 50.73      |    |     | N   |   |        |        |        |      |
| ATOM       | 66 | CA  | ASN | 6 | 13.915 | 2.759  | 15.331 | 1.00 |
| 71.04      |    |     | C   |   |        |        |        |      |
| ATOM       | 67 | C   | ASN | 6 | 13.912 | 2.142  | 16.727 | 1.00 |
| 65.17      |    |     | C   |   |        |        |        |      |
| ATOM       | 68 | O   | ASN | 6 | 14.435 | 2.729  | 17.674 | 1.00 |
| 94.86      |    |     | O   |   |        |        |        |      |
| ATOM       | 69 | CB  | ASN | 6 | 12.572 | 3.448  | 15.077 | 1.00 |
| 94.83      |    |     | C   |   |        |        |        |      |
| ATOM       | 70 | CG  | ASN | 6 | 12.668 | 4.342  | 13.847 |      |
| 1.00160.94 |    |     | C   |   |        |        |        |      |
| ATOM       | 71 | ND2 | ASN | 6 | 11.577 | 4.702  | 13.228 |      |
| 1.00244.88 |    |     | N   |   |        |        |        |      |
| ATOM       | 72 | OD1 | ASN | 6 | 13.766 | 4.721  | 13.438 |      |
| 1.00219.73 |    |     | O   |   |        |        |        |      |
| ATOM       | 73 | HN  | ASN | 6 | 13.480 | 1.588  | 13.619 | 1.00 |
| 72.81      |    |     | H   |   |        |        |        |      |
| ATOM       | 74 | HA  | ASN | 6 | 14.699 | 3.499  | 15.277 | 1.00 |
| 96.02      |    |     | H   |   |        |        |        |      |
| ATOM       | 75 | HB1 | ASN | 6 | 12.308 | 4.048  | 15.936 |      |
| 1.00111.09 |    |     | H   |   |        |        |        |      |

|            |     |      |     |   |        |        |        |      |
|------------|-----|------|-----|---|--------|--------|--------|------|
| ATOM       | 76  | HB2  | ASN | 6 | 11.810 | 2.698  | 14.918 | 1.00 |
| 98.13      |     |      | H   |   |        |        |        |      |
| ATOM       | 77  | HD21 | ASN | 6 | 10.705 | 4.400  | 13.556 |      |
| 1.00272.43 |     |      | H   |   |        |        |        |      |
| ATOM       | 78  | HD22 | ASN | 6 | 11.630 | 5.277  | 12.436 |      |
| 1.00336.78 |     |      | H   |   |        |        |        |      |
| ATOM       | 79  | N    | GLY | 7 | 13.318 | 0.955  | 16.850 | 1.00 |
| 51.80      |     |      | N   |   |        |        |        |      |
| ATOM       | 80  | CA   | GLY | 7 | 13.248 | 0.260  | 18.140 | 1.00 |
| 71.47      |     |      | C   |   |        |        |        |      |
| ATOM       | 81  | C    | GLY | 7 | 14.024 | -1.049 | 18.102 | 1.00 |
| 41.04      |     |      | C   |   |        |        |        |      |
| ATOM       | 82  | O    | GLY | 7 | 13.442 | -2.132 | 18.164 | 1.00 |
| 44.54      |     |      | O   |   |        |        |        |      |
| ATOM       | 83  | HN   | GLY | 7 | 12.917 | 0.538  | 16.061 | 1.00 |
| 45.49      |     |      | H   |   |        |        |        |      |
| ATOM       | 84  | HA1  | GLY | 7 | 12.219 | 0.044  | 18.362 |      |
| 1.00103.52 |     |      | H   |   |        |        |        |      |
| ATOM       | 85  | HA2  | GLY | 7 | 13.653 | 0.889  | 18.922 |      |
| 1.00108.67 |     |      | H   |   |        |        |        |      |
| ATOM       | 86  | N    | ASP | 8 | 15.340 | -0.940 | 18.002 | 1.00 |
| 27.00      |     |      | N   |   |        |        |        |      |
| ATOM       | 87  | CA   | ASP | 8 | 16.194 | -2.123 | 17.955 | 1.00 |
| 14.15      |     |      | C   |   |        |        |        |      |
| ATOM       | 88  | C    | ASP | 8 | 16.078 | -2.920 | 19.248 | 1.00 |
| 9.37       |     |      | C   |   |        |        |        |      |
| ATOM       | 89  | O    | ASP | 8 | 15.894 | -4.137 | 19.228 | 1.00 |
| 14.61      |     |      | O   |   |        |        |        |      |
| ATOM       | 90  | CB   | ASP | 8 | 17.651 | -1.712 | 17.748 | 1.00 |
| 15.06      |     |      | C   |   |        |        |        |      |
| ATOM       | 91  | CG   | ASP | 8 | 18.515 | -2.951 | 17.538 | 1.00 |
| 21.22      |     |      | C   |   |        |        |        |      |
| ATOM       | 92  | OD1  | ASP | 8 | 18.017 | -4.042 | 17.768 |      |
| 1.00119.56 |     |      | O   |   |        |        |        |      |
| ATOM       | 93  | OD2  | ASP | 8 | 19.661 | -2.795 | 17.152 |      |
| 1.00133.27 |     |      | O1- |   |        |        |        |      |
| ATOM       | 94  | HN   | ASP | 8 | 15.744 | -0.050 | 17.957 | 1.00 |
| 35.63      |     |      | H   |   |        |        |        |      |
| ATOM       | 95  | HA   | ASP | 8 | 15.887 | -2.744 | 17.134 | 1.00 |
| 20.92      |     |      | H   |   |        |        |        |      |
| ATOM       | 96  | HB1  | ASP | 8 | 18.000 | -1.179 | 18.619 | 1.00 |
| 29.39      |     |      | H   |   |        |        |        |      |
| ATOM       | 97  | HB2  | ASP | 8 | 17.723 | -1.070 | 16.883 | 1.00 |
| 44.14      |     |      | H   |   |        |        |        |      |
| ATOM       | 98  | N    | CYS | 9 | 16.191 | -2.223 | 20.368 | 1.00 |
| 5.93       |     |      | N   |   |        |        |        |      |
| ATOM       | 99  | CA   | CYS | 9 | 16.099 | -2.867 | 21.671 | 1.00 |
| 7.54       |     |      | C   |   |        |        |        |      |
| ATOM       | 100 | C    | CYS | 9 | 14.706 | -3.457 | 21.862 | 1.00 |
| 14.60      |     |      | C   |   |        |        |        |      |
| ATOM       | 101 | O    | CYS | 9 | 14.545 | -4.571 | 22.364 | 1.00 |
| 25.78      |     |      | O   |   |        |        |        |      |

|            |     |     |     |    |        |        |        |      |
|------------|-----|-----|-----|----|--------|--------|--------|------|
| ATOM       | 102 | CB  | CYS | 9  | 16.392 | -1.850 | 22.764 | 1.00 |
| 6.63       |     |     | C   |    |        |        |        |      |
| ATOM       | 103 | SG  | CYS | 9  | 18.127 | -1.388 | 22.651 | 1.00 |
| 10.91      |     |     | S   |    |        |        |        |      |
| ATOM       | 104 | HN  | CYS | 9  | 16.336 | -1.256 | 20.316 | 1.00 |
| 6.51       |     |     | H   |    |        |        |        |      |
| ATOM       | 105 | HA  | CYS | 9  | 16.836 | -3.650 | 21.726 | 1.00 |
| 11.12      |     |     | H   |    |        |        |        |      |
| ATOM       | 106 | HB1 | CYS | 9  | 16.207 | -2.285 | 23.731 | 1.00 |
| 11.28      |     |     | H   |    |        |        |        |      |
| ATOM       | 107 | HB2 | CYS | 9  | 15.772 | -0.977 | 22.630 | 1.00 |
| 5.04       |     |     | H   |    |        |        |        |      |
| ATOM       | 108 | N   | ALA | 10 | 13.707 | -2.694 | 21.437 | 1.00 |
| 16.26      |     |     | N   |    |        |        |        |      |
| ATOM       | 109 | CA  | ALA | 10 | 12.312 | -3.114 | 21.529 | 1.00 |
| 32.04      |     |     | C   |    |        |        |        |      |
| ATOM       | 110 | C   | ALA | 10 | 11.440 | -2.139 | 20.742 | 1.00 |
| 45.47      |     |     | C   |    |        |        |        |      |
| ATOM       | 111 | O   | ALA | 10 | 11.876 | -1.036 | 20.419 |      |
| 1.00119.04 |     |     | O   |    |        |        |        |      |
| ATOM       | 112 | CB  | ALA | 10 | 11.859 | -3.166 | 22.991 | 1.00 |
| 30.10      |     |     | C   |    |        |        |        |      |
| ATOM       | 113 | HN  | ALA | 10 | 13.915 | -1.824 | 21.038 | 1.00 |
| 12.81      |     |     | H   |    |        |        |        |      |
| ATOM       | 114 | HA  | ALA | 10 | 12.215 | -4.099 | 21.094 | 1.00 |
| 47.14      |     |     | H   |    |        |        |        |      |
| ATOM       | 115 | HB1 | ALA | 10 | 12.658 | -3.562 | 23.601 | 1.00 |
| 84.37      |     |     | H   |    |        |        |        |      |
| ATOM       | 116 | HB2 | ALA | 10 | 10.992 | -3.805 | 23.076 |      |
| 1.00118.20 |     |     | H   |    |        |        |        |      |
| ATOM       | 117 | HB3 | ALA | 10 | 11.606 | -2.172 | 23.332 |      |
| 1.00117.32 |     |     | H   |    |        |        |        |      |
| ATOM       | 118 | N   | ALA | 11 | 10.216 | -2.546 | 20.425 | 1.00 |
| 30.62      |     |     | N   |    |        |        |        |      |
| ATOM       | 119 | CA  | ALA | 11 | 9.320  | -1.679 | 19.663 | 1.00 |
| 35.24      |     |     | C   |    |        |        |        |      |
| ATOM       | 120 | C   | ALA | 11 | 9.073  | -0.371 | 20.409 | 1.00 |
| 22.78      |     |     | C   |    |        |        |        |      |
| ATOM       | 121 | O   | ALA | 11 | 9.140  | 0.710  | 19.821 | 1.00 |
| 53.33      |     |     | O   |    |        |        |        |      |
| ATOM       | 122 | CB  | ALA | 11 | 7.988  | -2.391 | 19.421 | 1.00 |
| 60.49      |     |     | C   |    |        |        |        |      |
| ATOM       | 123 | HN  | ALA | 11 | 9.914  | -3.436 | 20.698 | 1.00 |
| 50.37      |     |     | H   |    |        |        |        |      |
| ATOM       | 124 | HA  | ALA | 11 | 9.775  | -1.459 | 18.709 | 1.00 |
| 41.70      |     |     | H   |    |        |        |        |      |
| ATOM       | 125 | HB1 | ALA | 11 | 7.304  | -1.717 | 18.928 |      |
| 1.00157.06 |     |     | H   |    |        |        |        |      |
| ATOM       | 126 | HB2 | ALA | 11 | 7.569  | -2.702 | 20.367 |      |
| 1.00148.83 |     |     | H   |    |        |        |        |      |
| ATOM       | 127 | HB3 | ALA | 11 | 8.151  | -3.258 | 18.797 |      |
| 1.00137.06 |     |     | H   |    |        |        |        |      |

|            |     |     |     |    |        |        |        |      |
|------------|-----|-----|-----|----|--------|--------|--------|------|
| ATOM       | 128 | N   | ASP | 12 | 8.795  | -0.473 | 21.703 | 1.00 |
| 18.98      |     |     | N   |    |        |        |        |      |
| ATOM       | 129 | CA  | ASP | 12 | 8.548  | 0.713  | 22.518 | 1.00 |
| 31.05      |     |     | C   |    |        |        |        |      |
| ATOM       | 130 | C   | ASP | 12 | 9.840  | 1.494  | 22.747 | 1.00 |
| 22.98      |     |     | C   |    |        |        |        |      |
| ATOM       | 131 | O   | ASP | 12 | 9.839  | 2.724  | 22.769 | 1.00 |
| 37.14      |     |     | O   |    |        |        |        |      |
| ATOM       | 132 | CB  | ASP | 12 | 7.954  | 0.301  | 23.866 | 1.00 |
| 48.35      |     |     | C   |    |        |        |        |      |
| ATOM       | 133 | CG  | ASP | 12 | 6.523  | -0.194 | 23.678 |      |
| 1.00104.83 |     |     | C   |    |        |        |        |      |
| ATOM       | 134 | OD1 | ASP | 12 | 5.997  | -0.789 | 24.602 |      |
| 1.00258.73 |     |     | O   |    |        |        |        |      |
| ATOM       | 135 | OD2 | ASP | 12 | 5.977  | 0.030  | 22.610 |      |
| 1.00213.46 |     |     | O1- |    |        |        |        |      |
| ATOM       | 136 | HN  | ASP | 12 | 8.761  | -1.359 | 22.119 | 1.00 |
| 36.19      |     |     | H   |    |        |        |        |      |
| ATOM       | 137 | HA  | ASP | 12 | 7.840  | 1.347  | 22.006 | 1.00 |
| 49.76      |     |     | H   |    |        |        |        |      |
| ATOM       | 138 | HB1 | ASP | 12 | 7.952  | 1.152  | 24.531 | 1.00 |
| 95.71      |     |     | H   |    |        |        |        |      |
| ATOM       | 139 | HB2 | ASP | 12 | 8.553  | -0.488 | 24.296 | 1.00 |
| 54.37      |     |     | H   |    |        |        |        |      |
| ATOM       | 140 | N   | GLU | 13 | 10.934 | 0.762  | 22.931 | 1.00 |
| 17.60      |     |     | N   |    |        |        |        |      |
| ATOM       | 141 | CA  | GLU | 13 | 12.235 | 1.380  | 23.179 | 1.00 |
| 12.01      |     |     | C   |    |        |        |        |      |
| ATOM       | 142 | C   | GLU | 13 | 12.796 | 2.014  | 21.907 | 1.00 |
| 10.07      |     |     | C   |    |        |        |        |      |
| ATOM       | 143 | O   | GLU | 13 | 12.366 | 1.691  | 20.799 | 1.00 |
| 12.81      |     |     | O   |    |        |        |        |      |
| ATOM       | 144 | CB  | GLU | 13 | 13.203 | 0.320  | 23.704 | 1.00 |
| 11.74      |     |     | C   |    |        |        |        |      |
| ATOM       | 145 | CG  | GLU | 13 | 12.740 | -0.136 | 25.093 | 1.00 |
| 13.49      |     |     | C   |    |        |        |        |      |
| ATOM       | 146 | CD  | GLU | 13 | 13.457 | -1.419 | 25.494 |      |
| 1.00142.36 |     |     | C   |    |        |        |        |      |
| ATOM       | 147 | OE1 | GLU | 13 | 14.089 | -2.010 | 24.639 |      |
| 1.00339.06 |     |     | O   |    |        |        |        |      |
| ATOM       | 148 | OE2 | GLU | 13 | 13.357 | -1.795 | 26.649 |      |
| 1.00335.28 |     |     | O1- |    |        |        |        |      |
| ATOM       | 149 | HN  | GLU | 13 | 10.865 | -0.214 | 22.913 | 1.00 |
| 28.36      |     |     | H   |    |        |        |        |      |
| ATOM       | 150 | HA  | GLU | 13 | 12.121 | 2.146  | 23.930 | 1.00 |
| 13.06      |     |     | H   |    |        |        |        |      |
| ATOM       | 151 | HB1 | GLU | 13 | 14.194 | 0.742  | 23.778 | 1.00 |
| 13.76      |     |     | H   |    |        |        |        |      |
| ATOM       | 152 | HB2 | GLU | 13 | 13.219 | -0.523 | 23.030 | 1.00 |
| 9.94       |     |     | H   |    |        |        |        |      |
| ATOM       | 153 | HG1 | GLU | 13 | 11.675 | -0.314 | 25.075 | 1.00 |
| 66.02      |     |     | H   |    |        |        |        |      |

|       |     |     |     |    |        |       |        |      |
|-------|-----|-----|-----|----|--------|-------|--------|------|
| ATOM  | 154 | HG2 | GLU | 13 | 12.962 | 0.637 | 25.815 | 1.00 |
| 56.23 |     |     | H   |    |        |       |        |      |
| ATOM  | 155 | N   | CYS | 14 | 13.759 | 2.925 | 22.078 | 1.00 |
| 9.12  |     |     | N   |    |        |       |        |      |
| ATOM  | 156 | CA  | CYS | 14 | 14.384 | 3.617 | 20.947 | 1.00 |
| 10.69 |     |     | C   |    |        |       |        |      |
| ATOM  | 157 | C   | CYS | 14 | 15.832 | 3.169 | 20.784 | 1.00 |
| 9.56  |     |     | C   |    |        |       |        |      |
| ATOM  | 158 | O   | CYS | 14 | 16.440 | 2.664 | 21.723 | 1.00 |
| 13.62 |     |     | O   |    |        |       |        |      |
| ATOM  | 159 | CB  | CYS | 14 | 14.343 | 5.130 | 21.179 | 1.00 |
| 13.96 |     |     | C   |    |        |       |        |      |
| ATOM  | 160 | SG  | CYS | 14 | 15.130 | 5.978 | 19.785 | 1.00 |
| 42.96 |     |     | S   |    |        |       |        |      |
| ATOM  | 161 | HN  | CYS | 14 | 14.056 | 3.138 | 22.987 | 1.00 |
| 9.76  |     |     | H   |    |        |       |        |      |
| ATOM  | 162 | HA  | CYS | 14 | 13.843 | 3.391 | 20.037 | 1.00 |
| 15.54 |     |     | H   |    |        |       |        |      |
| ATOM  | 163 | HB1 | CYS | 14 | 14.872 | 5.368 | 22.090 | 1.00 |
| 50.72 |     |     | H   |    |        |       |        |      |
| ATOM  | 164 | HB2 | CYS | 14 | 13.316 | 5.454 | 21.263 | 1.00 |
| 46.13 |     |     | H   |    |        |       |        |      |
| ATOM  | 165 | N   | CYS | 15 | 16.376 | 3.366 | 19.585 | 1.00 |
| 9.60  |     |     | N   |    |        |       |        |      |
| ATOM  | 166 | CA  | CYS | 15 | 17.759 | 2.988 | 19.297 | 1.00 |
| 9.28  |     |     | C   |    |        |       |        |      |
| ATOM  | 167 | C   | CYS | 15 | 18.337 | 3.936 | 18.255 | 1.00 |
| 9.92  |     |     | C   |    |        |       |        |      |
| ATOM  | 168 | O   | CYS | 15 | 17.719 | 4.173 | 17.218 | 1.00 |
| 13.31 |     |     | O   |    |        |       |        |      |
| ATOM  | 169 | CB  | CYS | 15 | 17.816 | 1.554 | 18.767 | 1.00 |
| 12.90 |     |     | C   |    |        |       |        |      |
| ATOM  | 170 | SG  | CYS | 15 | 19.544 | 1.034 | 18.591 | 1.00 |
| 39.11 |     |     | S   |    |        |       |        |      |
| ATOM  | 171 | HN  | CYS | 15 | 15.838 | 3.779 | 18.877 | 1.00 |
| 13.12 |     |     | H   |    |        |       |        |      |
| ATOM  | 172 | HA  | CYS | 15 | 18.348 | 3.056 | 20.203 | 1.00 |
| 8.26  |     |     | H   |    |        |       |        |      |
| ATOM  | 173 | HB1 | CYS | 15 | 17.326 | 1.507 | 17.805 | 1.00 |
| 24.82 |     |     | H   |    |        |       |        |      |
| ATOM  | 174 | HB2 | CYS | 15 | 17.311 | 0.895 | 19.459 | 1.00 |
| 27.31 |     |     | H   |    |        |       |        |      |
| ATOM  | 175 | N   | VAL | 16 | 19.520 | 4.480 | 18.527 | 1.00 |
| 9.56  |     |     | N   |    |        |       |        |      |
| ATOM  | 176 | CA  | VAL | 16 | 20.151 | 5.403 | 17.588 | 1.00 |
| 11.99 |     |     | C   |    |        |       |        |      |
| ATOM  | 177 | C   | VAL | 16 | 21.666 | 5.299 | 17.678 | 1.00 |
| 7.73  |     |     | C   |    |        |       |        |      |
| ATOM  | 178 | O   | VAL | 16 | 22.240 | 5.351 | 18.766 | 1.00 |
| 8.83  |     |     | O   |    |        |       |        |      |
| ATOM  | 179 | CB  | VAL | 16 | 19.706 | 6.833 | 17.889 | 1.00 |
| 18.37 |     |     | C   |    |        |       |        |      |

|            |     |      |     |    |        |       |        |      |
|------------|-----|------|-----|----|--------|-------|--------|------|
| ATOM       | 180 | CG1  | VAL | 16 | 20.223 | 7.257 | 19.264 | 1.00 |
| 39.61      |     | C    |     |    |        |       |        |      |
| ATOM       | 181 | CG2  | VAL | 16 | 20.262 | 7.775 | 16.819 |      |
| 1.00115.21 |     | C    |     |    |        |       |        |      |
| ATOM       | 182 | HN   | VAL | 16 | 19.977 | 4.259 | 19.368 | 1.00 |
| 9.76       |     | H    |     |    |        |       |        |      |
| ATOM       | 183 | HA   | VAL | 16 | 19.848 | 5.149 | 16.580 | 1.00 |
| 17.27      |     | H    |     |    |        |       |        |      |
| ATOM       | 184 | HB   | VAL | 16 | 18.626 | 6.881 | 17.884 | 1.00 |
| 52.63      |     | H    |     |    |        |       |        |      |
| ATOM       | 185 | HG11 | VAL | 16 | 21.284 | 7.456 | 19.203 |      |
| 1.00128.07 |     | H    |     |    |        |       |        |      |
| ATOM       | 186 | HG12 | VAL | 16 | 20.046 | 6.465 | 19.974 |      |
| 1.00154.13 |     | H    |     |    |        |       |        |      |
| ATOM       | 187 | HG13 | VAL | 16 | 19.707 | 8.150 | 19.584 |      |
| 1.00135.74 |     | H    |     |    |        |       |        |      |
| ATOM       | 188 | HG21 | VAL | 16 | 21.341 | 7.779 | 16.869 |      |
| 1.00229.05 |     | H    |     |    |        |       |        |      |
| ATOM       | 189 | HG22 | VAL | 16 | 19.887 | 8.774 | 16.990 |      |
| 1.00261.82 |     | H    |     |    |        |       |        |      |
| ATOM       | 190 | HG23 | VAL | 16 | 19.947 | 7.435 | 15.844 |      |
| 1.00210.07 |     | H    |     |    |        |       |        |      |
| ATOM       | 191 | N    | ASP | 17 | 22.309 | 5.144 | 16.526 | 1.00 |
| 14.34      |     | N    |     |    |        |       |        |      |
| ATOM       | 192 | CA   | ASP | 17 | 23.763 | 5.023 | 16.475 | 1.00 |
| 11.90      |     | C    |     |    |        |       |        |      |
| ATOM       | 193 | C    | ASP | 17 | 24.411 | 6.384 | 16.255 | 1.00 |
| 13.15      |     | C    |     |    |        |       |        |      |
| ATOM       | 194 | O    | ASP | 17 | 24.183 | 7.038 | 15.236 | 1.00 |
| 25.96      |     | O    |     |    |        |       |        |      |
| ATOM       | 195 | CB   | ASP | 17 | 24.162 | 4.083 | 15.336 | 1.00 |
| 20.80      |     | C    |     |    |        |       |        |      |
| ATOM       | 196 | CG   | ASP | 17 | 23.520 | 2.716 | 15.544 | 1.00 |
| 28.72      |     | C    |     |    |        |       |        |      |
| ATOM       | 197 | OD1  | ASP | 17 | 22.910 | 2.223 | 14.609 |      |
| 1.00135.42 |     | O    |     |    |        |       |        |      |
| ATOM       | 198 | OD2  | ASP | 17 | 23.648 | 2.182 | 16.633 |      |
| 1.00114.17 |     | O1-  |     |    |        |       |        |      |
| ATOM       | 199 | HN   | ASP | 17 | 21.796 | 5.102 | 15.690 | 1.00 |
| 28.29      |     | H    |     |    |        |       |        |      |
| ATOM       | 200 | HA   | ASP | 17 | 24.123 | 4.610 | 17.406 | 1.00 |
| 10.49      |     | H    |     |    |        |       |        |      |
| ATOM       | 201 | HB1  | ASP | 17 | 25.236 | 3.974 | 15.321 | 1.00 |
| 22.42      |     | H    |     |    |        |       |        |      |
| ATOM       | 202 | HB2  | ASP | 17 | 23.829 | 4.497 | 14.395 | 1.00 |
| 29.52      |     | H    |     |    |        |       |        |      |
| ATOM       | 203 | N    | THR | 18 | 25.236 | 6.800 | 17.215 | 1.00 |
| 11.55      |     | N    |     |    |        |       |        |      |
| ATOM       | 204 | CA   | THR | 18 | 25.939 | 8.080 | 17.128 | 1.00 |
| 17.10      |     | C    |     |    |        |       |        |      |
| ATOM       | 205 | C    | THR | 18 | 27.395 | 7.848 | 16.756 | 1.00 |
| 10.63      |     | C    |     |    |        |       |        |      |



|            |     |      |     |    |        |        |        |      |
|------------|-----|------|-----|----|--------|--------|--------|------|
| ATOM       | 206 | O    | THR | 18 | 27.911 | 6.743  | 16.914 | 1.00 |
| 6.49       |     | O    |     |    |        |        |        |      |
| ATOM       | 207 | CB   | THR | 18 | 25.870 | 8.811  | 18.472 | 1.00 |
| 28.52      |     | C    |     |    |        |        |        |      |
| ATOM       | 208 | CG2  | THR | 18 | 24.452 | 9.325  | 18.708 | 1.00 |
| 45.38      |     | C    |     |    |        |        |        |      |
| ATOM       | 209 | OG1  | THR | 18 | 26.236 | 7.918  | 19.511 | 1.00 |
| 26.49      |     | O    |     |    |        |        |        |      |
| ATOM       | 210 | HN   | THR | 18 | 25.382 | 6.227  | 17.996 | 1.00 |
| 13.96      |     | H    |     |    |        |        |        |      |
| ATOM       | 211 | HA   | THR | 18 | 25.477 | 8.699  | 16.371 | 1.00 |
| 26.43      |     | H    |     |    |        |        |        |      |
| ATOM       | 212 | HB   | THR | 18 | 26.552 | 9.647  | 18.459 | 1.00 |
| 37.43      |     | H    |     |    |        |        |        |      |
| ATOM       | 213 | HG1  | THR | 18 | 25.477 | 7.368  | 19.710 | 1.00 |
| 71.62      |     | H    |     |    |        |        |        |      |
| ATOM       | 214 | HG21 | THR | 18 | 24.275 | 10.189 | 18.085 |      |
| 1.00100.44 |     |      |     | H  |        |        |        |      |
| ATOM       | 215 | HG22 | THR | 18 | 24.341 | 9.602  | 19.745 |      |
| 1.00129.42 |     |      |     | H  |        |        |        |      |
| ATOM       | 216 | HG23 | THR | 18 | 23.741 | 8.551  | 18.463 |      |
| 1.00156.21 |     |      |     | H  |        |        |        |      |
| ATOM       | 217 | N    | VAL | 19 | 28.052 | 8.899  | 16.278 | 1.00 |
| 16.32      |     | N    |     |    |        |        |        |      |
| ATOM       | 218 | CA   | VAL | 19 | 29.442 | 8.823  | 15.896 | 1.00 |
| 13.34      |     | C    |     |    |        |        |        |      |
| ATOM       | 219 | C    | VAL | 19 | 29.895 | 10.173 | 15.383 | 1.00 |
| 25.88      |     | C    |     |    |        |        |        |      |
| ATOM       | 220 | O    | VAL | 19 | 29.389 | 10.692 | 14.387 | 1.00 |
| 42.11      |     | O    |     |    |        |        |        |      |
| ATOM       | 221 | CB   | VAL | 19 | 29.679 | 7.760  | 14.824 | 1.00 |
| 15.48      |     | C    |     |    |        |        |        |      |
| ATOM       | 222 | CG1  | VAL | 19 | 28.736 | 7.982  | 13.637 | 1.00 |
| 29.06      |     | C    |     |    |        |        |        |      |
| ATOM       | 223 | CG2  | VAL | 19 | 31.136 | 7.853  | 14.350 | 1.00 |
| 20.67      |     | C    |     |    |        |        |        |      |
| ATOM       | 224 | HN   | VAL | 19 | 27.596 | 9.757  | 16.195 | 1.00 |
| 26.89      |     | H    |     |    |        |        |        |      |
| ATOM       | 225 | HA   | VAL | 19 | 30.026 | 8.572  | 16.769 | 1.00 |
| 8.08       |     | H    |     |    |        |        |        |      |
| ATOM       | 226 | HB   | VAL | 19 | 29.503 | 6.786  | 15.248 | 1.00 |
| 11.49      |     | H    |     |    |        |        |        |      |
| ATOM       | 227 | HG11 | VAL | 19 | 29.102 | 8.799  | 13.031 |      |
| 1.00137.43 |     |      |     | H  |        |        |        |      |
| ATOM       | 228 | HG12 | VAL | 19 | 27.747 | 8.220  | 14.000 | 1.00 |
| 93.29      |     | H    |     |    |        |        |        |      |
| ATOM       | 229 | HG13 | VAL | 19 | 28.694 | 7.084  | 13.039 |      |
| 1.00108.69 |     |      |     | H  |        |        |        |      |
| ATOM       | 230 | HG21 | VAL | 19 | 31.400 | 6.959  | 13.807 | 1.00 |
| 99.42      |     | H    |     |    |        |        |        |      |
| ATOM       | 231 | HG22 | VAL | 19 | 31.788 | 7.963  | 15.208 |      |
| 1.00111.36 |     |      |     | H  |        |        |        |      |

|            |     |      |     |    |        |        |        |      |
|------------|-----|------|-----|----|--------|--------|--------|------|
| ATOM       | 232 | HG23 | VAL | 19 | 31.249 | 8.715  | 13.707 | 1.00 |
| 77.11      |     |      | H   |    |        |        |        |      |
| ATOM       | 233 | N    | PHE | 20 | 30.838 | 10.733 | 16.097 | 1.00 |
| 24.58      |     |      | N   |    |        |        |        |      |
| ATOM       | 234 | CA   | PHE | 20 | 31.389 | 12.039 | 15.778 | 1.00 |
| 40.34      |     |      | C   |    |        |        |        |      |
| ATOM       | 235 | C    | PHE | 20 | 32.762 | 11.917 | 15.138 | 1.00 |
| 40.37      |     |      | C   |    |        |        |        |      |
| ATOM       | 236 | O    | PHE | 20 | 32.970 | 12.343 | 14.002 | 1.00 |
| 66.02      |     |      | O   |    |        |        |        |      |
| ATOM       | 237 | CB   | PHE | 20 | 31.493 | 12.868 | 17.065 | 1.00 |
| 48.79      |     |      | C   |    |        |        |        |      |
| ATOM       | 238 | CG   | PHE | 20 | 31.873 | 11.989 | 18.246 | 1.00 |
| 35.75      |     |      | C   |    |        |        |        |      |
| ATOM       | 239 | CD1  | PHE | 20 | 30.974 | 11.025 | 18.743 | 1.00 |
| 30.20      |     |      | C   |    |        |        |        |      |
| ATOM       | 240 | CD2  | PHE | 20 | 33.120 | 12.156 | 18.864 | 1.00 |
| 40.95      |     |      | C   |    |        |        |        |      |
| ATOM       | 241 | CE1  | PHE | 20 | 31.329 | 10.240 | 19.843 | 1.00 |
| 30.41      |     |      | C   |    |        |        |        |      |
| ATOM       | 242 | CE2  | PHE | 20 | 33.470 | 11.364 | 19.964 | 1.00 |
| 45.84      |     |      | C   |    |        |        |        |      |
| ATOM       | 243 | CZ   | PHE | 20 | 32.575 | 10.406 | 20.452 | 1.00 |
| 40.81      |     |      | C   |    |        |        |        |      |
| ATOM       | 244 | HN   | PHE | 20 | 31.159 | 10.257 | 16.881 | 1.00 |
| 16.73      |     |      | H   |    |        |        |        |      |
| ATOM       | 245 | HA   | PHE | 20 | 30.731 | 12.553 | 15.087 | 1.00 |
| 59.91      |     |      | H   |    |        |        |        |      |
| ATOM       | 246 | HB1  | PHE | 20 | 30.549 | 13.317 | 17.259 | 1.00 |
| 67.15      |     |      | H   |    |        |        |        |      |
| ATOM       | 247 | HB2  | PHE | 20 | 32.231 | 13.648 | 16.941 | 1.00 |
| 58.17      |     |      | H   |    |        |        |        |      |
| ATOM       | 248 | HD1  | PHE | 20 | 30.008 | 10.882 | 18.278 | 1.00 |
| 33.34      |     |      | H   |    |        |        |        |      |
| ATOM       | 249 | HD2  | PHE | 20 | 33.813 | 12.894 | 18.489 | 1.00 |
| 49.35      |     |      | H   |    |        |        |        |      |
| ATOM       | 250 | HE1  | PHE | 20 | 30.638 | 9.502  | 20.220 | 1.00 |
| 30.61      |     |      | H   |    |        |        |        |      |
| ATOM       | 251 | HE2  | PHE | 20 | 34.430 | 11.495 | 20.437 | 1.00 |
| 61.27      |     |      | H   |    |        |        |        |      |
| ATOM       | 252 | HZ   | PHE | 20 | 32.848 | 9.797  | 21.302 | 1.00 |
| 52.66      |     |      | H   |    |        |        |        |      |
| ATOM       | 253 | N    | GLU | 21 | 33.706 | 11.372 | 15.891 | 1.00 |
| 41.31      |     |      | N   |    |        |        |        |      |
| ATOM       | 254 | CA   | GLU | 21 | 35.067 | 11.238 | 15.424 | 1.00 |
| 56.16      |     |      | C   |    |        |        |        |      |
| ATOM       | 255 | C    | GLU | 21 | 35.386 | 9.814  | 15.002 | 1.00 |
| 58.61      |     |      | C   |    |        |        |        |      |
| ATOM       | 256 | O    | GLU | 21 | 34.532 | 8.928  | 15.034 |      |
| 1.00201.19 |     |      | O   |    |        |        |        |      |
| ATOM       | 257 | CB   | GLU | 21 | 35.974 | 11.670 | 16.555 | 1.00 |
| 57.37      |     |      | C   |    |        |        |        |      |

|            |     |     |     |     |        |        |        |      |
|------------|-----|-----|-----|-----|--------|--------|--------|------|
| ATOM       | 258 | CG  | GLU | 21  | 35.899 | 10.663 | 17.704 |      |
| 1.00193.56 |     |     |     | C   |        |        |        |      |
| ATOM       | 259 | CD  | GLU | 21  | 36.618 | 11.223 | 18.928 |      |
| 1.00304.62 |     |     |     | C   |        |        |        |      |
| ATOM       | 260 | OE1 | GLU | 21  | 36.542 | 10.599 | 19.975 |      |
| 1.00451.81 |     |     |     | O   |        |        |        |      |
| ATOM       | 261 | OE2 | GLU | 21  | 37.235 | 12.266 | 18.801 |      |
| 1.00442.88 |     |     |     | O1- |        |        |        |      |
| ATOM       | 262 | HN  | GLU | 21  | 33.496 | 11.083 | 16.800 | 1.00 |
| 50.82      |     |     | H   |     |        |        |        |      |
| ATOM       | 263 | HA  | GLU | 21  | 35.233 | 11.898 | 14.583 | 1.00 |
| 85.72      |     |     | H   |     |        |        |        |      |
| ATOM       | 264 | HB1 | GLU | 21  | 35.640 | 12.631 | 16.906 | 1.00 |
| 46.37      |     |     | H   |     |        |        |        |      |
| ATOM       | 265 | HB2 | GLU | 21  | 36.981 | 11.743 | 16.200 |      |
| 1.00131.81 |     |     |     | H   |        |        |        |      |
| ATOM       | 266 | HG1 | GLU | 21  | 36.369 | 9.742  | 17.404 |      |
| 1.00314.91 |     |     |     | H   |        |        |        |      |
| ATOM       | 267 | HG2 | GLU | 21  | 34.866 | 10.472 | 17.947 |      |
| 1.00266.92 |     |     |     | H   |        |        |        |      |
| ATOM       | 268 | N   | GLY | 22  | 36.631 | 9.617  | 14.592 | 1.00 |
| 86.70      |     |     | N   |     |        |        |        |      |
| ATOM       | 269 | CA  | GLY | 22  | 37.097 | 8.303  | 14.141 |      |
| 1.00104.66 |     |     |     | C   |        |        |        |      |
| ATOM       | 270 | C   | GLY | 22  | 37.745 | 7.521  | 15.278 | 1.00 |
| 71.50      |     |     | C   |     |        |        |        |      |
| ATOM       | 271 | O   | GLY | 22  | 38.035 | 6.333  | 15.140 | 1.00 |
| 89.87      |     |     | O   |     |        |        |        |      |
| ATOM       | 272 | HN  | GLY | 22  | 37.252 | 10.378 | 14.595 |      |
| 1.00214.64 |     |     |     | H   |        |        |        |      |
| ATOM       | 273 | HA1 | GLY | 22  | 37.823 | 8.440  | 13.353 |      |
| 1.00152.47 |     |     |     | H   |        |        |        |      |
| ATOM       | 274 | HA2 | GLY | 22  | 36.260 | 7.738  | 13.754 |      |
| 1.00118.15 |     |     |     | H   |        |        |        |      |
| ATOM       | 275 | N   | ASP | 23  | 37.975 | 8.195  | 16.396 | 1.00 |
| 44.68      |     |     | N   |     |        |        |        |      |
| ATOM       | 276 | CA  | ASP | 23  | 38.596 | 7.555  | 17.550 | 1.00 |
| 43.33      |     |     | C   |     |        |        |        |      |
| ATOM       | 277 | C   | ASP | 23  | 37.745 | 6.397  | 18.053 | 1.00 |
| 37.55      |     |     | C   |     |        |        |        |      |
| ATOM       | 278 | O   | ASP | 23  | 38.258 | 5.321  | 18.362 | 1.00 |
| 61.37      |     |     | O   |     |        |        |        |      |
| ATOM       | 279 | CB  | ASP | 23  | 38.779 | 8.574  | 18.673 | 1.00 |
| 40.74      |     |     | C   |     |        |        |        |      |
| ATOM       | 280 | CG  | ASP | 23  | 39.551 | 7.947  | 19.827 |      |
| 1.00141.86 |     |     |     | C   |        |        |        |      |
| ATOM       | 281 | OD1 | ASP | 23  | 39.912 | 8.674  | 20.738 |      |
| 1.00328.18 |     |     |     | O   |        |        |        |      |
| ATOM       | 282 | OD2 | ASP | 23  | 39.771 | 6.747  | 19.785 |      |
| 1.00304.58 |     |     |     | O1- |        |        |        |      |
| ATOM       | 283 | HN  | ASP | 23  | 37.730 | 9.141  | 16.445 | 1.00 |
| 40.86      |     |     | H   |     |        |        |        |      |

|            |     |     |     |    |        |       |        |      |
|------------|-----|-----|-----|----|--------|-------|--------|------|
| ATOM       | 284 | HA  | ASP | 23 | 39.563 | 7.177 | 17.262 | 1.00 |
| 72.12      |     |     | H   |    |        |       |        |      |
| ATOM       | 285 | HB1 | ASP | 23 | 37.808 | 8.892 | 19.024 | 1.00 |
| 94.15      |     |     | H   |    |        |       |        |      |
| ATOM       | 286 | HB2 | ASP | 23 | 39.322 | 9.428 | 18.297 | 1.00 |
| 93.26      |     |     | H   |    |        |       |        |      |
| ATOM       | 287 | N   | MET | 24 | 36.442 | 6.628 | 18.141 | 1.00 |
| 23.24      |     |     | N   |    |        |       |        |      |
| ATOM       | 288 | CA  | MET | 24 | 35.521 | 5.601 | 18.618 | 1.00 |
| 32.50      |     |     | C   |    |        |       |        |      |
| ATOM       | 289 | C   | MET | 24 | 34.092 | 5.899 | 18.175 | 1.00 |
| 25.13      |     |     | C   |    |        |       |        |      |
| ATOM       | 290 | O   | MET | 24 | 33.801 | 6.979 | 17.663 | 1.00 |
| 54.40      |     |     | O   |    |        |       |        |      |
| ATOM       | 291 | CB  | MET | 24 | 35.581 | 5.516 | 20.145 | 1.00 |
| 47.36      |     |     | C   |    |        |       |        |      |
| ATOM       | 292 | CG  | MET | 24 | 35.163 | 6.858 | 20.752 |      |
| 1.00151.73 |     |     | C   |    |        |       |        |      |
| ATOM       | 293 | SD  | MET | 24 | 35.345 | 6.788 | 22.551 |      |
| 1.00209.23 |     |     | S   |    |        |       |        |      |
| ATOM       | 294 | CE  | MET | 24 | 34.735 | 8.454 | 22.907 |      |
| 1.00243.29 |     |     | C   |    |        |       |        |      |
| ATOM       | 295 | HN  | MET | 24 | 36.095 | 7.506 | 17.885 | 1.00 |
| 17.32      |     |     | H   |    |        |       |        |      |
| ATOM       | 296 | HA  | MET | 24 | 35.820 | 4.647 | 18.208 | 1.00 |
| 48.94      |     |     | H   |    |        |       |        |      |
| ATOM       | 297 | HB1 | MET | 24 | 36.589 | 5.284 | 20.453 |      |
| 1.00124.40 |     |     | H   |    |        |       |        |      |
| ATOM       | 298 | HB2 | MET | 24 | 34.912 | 4.741 | 20.488 |      |
| 1.00166.96 |     |     | H   |    |        |       |        |      |
| ATOM       | 299 | HG1 | MET | 24 | 34.131 | 7.060 | 20.504 |      |
| 1.00331.71 |     |     | H   |    |        |       |        |      |
| ATOM       | 300 | HG2 | MET | 24 | 35.789 | 7.643 | 20.357 |      |
| 1.00302.30 |     |     | H   |    |        |       |        |      |
| ATOM       | 301 | HE1 | MET | 24 | 35.190 | 8.817 | 23.818 |      |
| 1.00340.44 |     |     | H   |    |        |       |        |      |
| ATOM       | 302 | HE2 | MET | 24 | 33.664 | 8.428 | 23.029 |      |
| 1.00373.88 |     |     | H   |    |        |       |        |      |
| ATOM       | 303 | HE3 | MET | 24 | 34.986 | 9.111 | 22.086 |      |
| 1.00386.81 |     |     | H   |    |        |       |        |      |
| ATOM       | 304 | N   | VAL | 25 | 33.204 | 4.926 | 18.380 | 1.00 |
| 22.44      |     |     | N   |    |        |       |        |      |
| ATOM       | 305 | CA  | VAL | 25 | 31.792 | 5.069 | 18.007 | 1.00 |
| 15.37      |     |     | C   |    |        |       |        |      |
| ATOM       | 306 | C   | VAL | 25 | 30.900 | 4.954 | 19.238 | 1.00 |
| 17.47      |     |     | C   |    |        |       |        |      |
| ATOM       | 307 | O   | VAL | 25 | 31.184 | 4.189 | 20.160 | 1.00 |
| 29.52      |     |     | O   |    |        |       |        |      |
| ATOM       | 308 | CB  | VAL | 25 | 31.405 | 3.991 | 16.989 | 1.00 |
| 23.36      |     |     | C   |    |        |       |        |      |
| ATOM       | 309 | CG1 | VAL | 25 | 29.888 | 4.029 | 16.740 | 1.00 |
| 58.39      |     |     | C   |    |        |       |        |      |

|            |     |      |     |    |        |       |        |      |
|------------|-----|------|-----|----|--------|-------|--------|------|
| ATOM       | 310 | CG2  | VAL | 25 | 32.152 | 4.252 | 15.676 | 1.00 |
| 55.25      |     |      | C   |    |        |       |        |      |
| ATOM       | 311 | HN   | VAL | 25 | 33.502 | 4.090 | 18.794 | 1.00 |
| 48.11      |     |      | H   |    |        |       |        |      |
| ATOM       | 312 | HA   | VAL | 25 | 31.632 | 6.044 | 17.558 | 1.00 |
| 9.25       |     |      | H   |    |        |       |        |      |
| ATOM       | 313 | HB   | VAL | 25 | 31.682 | 3.019 | 17.373 | 1.00 |
| 52.45      |     |      | H   |    |        |       |        |      |
| ATOM       | 314 | HG11 | VAL | 25 | 29.662 | 3.593 | 15.778 |      |
| 1.00171.07 |     |      | H   |    |        |       |        |      |
| ATOM       | 315 | HG12 | VAL | 25 | 29.541 | 5.052 | 16.763 |      |
| 1.00166.22 |     |      | H   |    |        |       |        |      |
| ATOM       | 316 | HG13 | VAL | 25 | 29.385 | 3.468 | 17.514 |      |
| 1.00134.76 |     |      | H   |    |        |       |        |      |
| ATOM       | 317 | HG21 | VAL | 25 | 31.806 | 3.561 | 14.922 |      |
| 1.00141.88 |     |      | H   |    |        |       |        |      |
| ATOM       | 318 | HG22 | VAL | 25 | 33.212 | 4.115 | 15.830 |      |
| 1.00184.50 |     |      | H   |    |        |       |        |      |
| ATOM       | 319 | HG23 | VAL | 25 | 31.963 | 5.264 | 15.350 |      |
| 1.00133.90 |     |      | H   |    |        |       |        |      |
| ATOM       | 320 | N    | THR | 26 | 29.825 | 5.738 | 19.245 | 1.00 |
| 13.60      |     |      | N   |    |        |       |        |      |
| ATOM       | 321 | CA   | THR | 26 | 28.881 | 5.756 | 20.363 | 1.00 |
| 21.19      |     |      | C   |    |        |       |        |      |
| ATOM       | 322 | C    | THR | 26 | 27.490 | 5.298 | 19.924 | 1.00 |
| 16.55      |     |      | C   |    |        |       |        |      |
| ATOM       | 323 | O    | THR | 26 | 26.973 | 5.738 | 18.897 | 1.00 |
| 11.43      |     |      | O   |    |        |       |        |      |
| ATOM       | 324 | CB   | THR | 26 | 28.799 | 7.178 | 20.908 | 1.00 |
| 27.07      |     |      | C   |    |        |       |        |      |
| ATOM       | 325 | CG2  | THR | 26 | 27.774 | 7.245 | 22.044 | 1.00 |
| 44.39      |     |      | C   |    |        |       |        |      |
| ATOM       | 326 | OG1  | THR | 26 | 30.077 | 7.563 | 21.398 | 1.00 |
| 34.75      |     |      | O   |    |        |       |        |      |
| ATOM       | 327 | HN   | THR | 26 | 29.667 | 6.331 | 18.482 | 1.00 |
| 10.81      |     |      | H   |    |        |       |        |      |
| ATOM       | 328 | HA   | THR | 26 | 29.233 | 5.104 | 21.150 | 1.00 |
| 33.16      |     |      | H   |    |        |       |        |      |
| ATOM       | 329 | HB   | THR | 26 | 28.503 | 7.847 | 20.110 | 1.00 |
| 20.60      |     |      | H   |    |        |       |        |      |
| ATOM       | 330 | HG1  | THR | 26 | 29.952 | 7.986 | 22.250 | 1.00 |
| 77.72      |     |      | H   |    |        |       |        |      |
| ATOM       | 331 | HG21 | THR | 26 | 26.779 | 7.121 | 21.643 |      |
| 1.00126.99 |     |      | H   |    |        |       |        |      |
| ATOM       | 332 | HG22 | THR | 26 | 27.846 | 8.203 | 22.537 |      |
| 1.00108.32 |     |      | H   |    |        |       |        |      |
| ATOM       | 333 | HG23 | THR | 26 | 27.977 | 6.459 | 22.756 |      |
| 1.00151.99 |     |      | H   |    |        |       |        |      |
| ATOM       | 334 | N    | ARG | 27 | 26.886 | 4.416 | 20.723 | 1.00 |
| 22.38      |     |      | N   |    |        |       |        |      |
| ATOM       | 335 | CA   | ARG | 27 | 25.545 | 3.895 | 20.438 | 1.00 |
| 20.21      |     |      | C   |    |        |       |        |      |

|            |     |      |     |    |        |        |        |      |
|------------|-----|------|-----|----|--------|--------|--------|------|
| ATOM       | 336 | C    | ARG | 27 | 24.641 | 4.108  | 21.651 | 1.00 |
| 16.96      |     |      | C   |    |        |        |        |      |
| ATOM       | 337 | O    | ARG | 27 | 25.106 | 4.066  | 22.789 | 1.00 |
| 20.06      |     |      | O   |    |        |        |        |      |
| ATOM       | 338 | CB   | ARG | 27 | 25.620 | 2.399  | 20.122 | 1.00 |
| 22.14      |     |      | C   |    |        |        |        |      |
| ATOM       | 339 | CG   | ARG | 27 | 26.499 | 2.176  | 18.889 |      |
| 1.00124.30 |     |      | C   |    |        |        |        |      |
| ATOM       | 340 | CD   | ARG | 27 | 26.747 | 0.678  | 18.706 |      |
| 1.00109.38 |     |      | C   |    |        |        |        |      |
| ATOM       | 341 | NE   | ARG | 27 | 27.517 | 0.152  | 19.829 |      |
| 1.00227.73 |     |      | N   |    |        |        |        |      |
| ATOM       | 342 | CZ   | ARG | 27 | 27.790 | -1.145 | 19.928 |      |
| 1.00426.12 |     |      | C   |    |        |        |        |      |
| ATOM       | 343 | NH1  | ARG | 27 | 28.477 | -1.592 | 20.944 |      |
| 1.00767.09 |     |      | N1+ |    |        |        |        |      |
| ATOM       | 344 | NH2  | ARG | 27 | 27.372 | -1.972 | 19.008 |      |
| 1.00581.78 |     |      | N   |    |        |        |        |      |
| ATOM       | 345 | HN   | ARG | 27 | 27.351 | 4.112  | 21.531 | 1.00 |
| 30.75      |     |      | H   |    |        |        |        |      |
| ATOM       | 346 | HA   | ARG | 27 | 25.122 | 4.414  | 19.588 | 1.00 |
| 23.13      |     |      | H   |    |        |        |        |      |
| ATOM       | 347 | HB1  | ARG | 27 | 24.629 | 2.022  | 19.927 | 1.00 |
| 87.46      |     |      | H   |    |        |        |        |      |
| ATOM       | 348 | HB2  | ARG | 27 | 26.046 | 1.875  | 20.967 |      |
| 1.00103.36 |     |      | H   |    |        |        |        |      |
| ATOM       | 349 | HG1  | ARG | 27 | 27.442 | 2.682  | 19.022 |      |
| 1.00281.97 |     |      | H   |    |        |        |        |      |
| ATOM       | 350 | HG2  | ARG | 27 | 25.999 | 2.568  | 18.015 |      |
| 1.00276.19 |     |      | H   |    |        |        |        |      |
| ATOM       | 351 | HD1  | ARG | 27 | 27.295 | 0.516  | 17.788 |      |
| 1.00183.60 |     |      | H   |    |        |        |        |      |
| ATOM       | 352 | HD2  | ARG | 27 | 25.802 | 0.162  | 18.652 |      |
| 1.00142.93 |     |      | H   |    |        |        |        |      |
| ATOM       | 353 | HE   | ARG | 27 | 27.835 | 0.766  | 20.523 |      |
| 1.00372.53 |     |      | H   |    |        |        |        |      |
| ATOM       | 354 | HH11 | ARG | 27 | 28.797 | -0.958 | 21.648 |      |
| 1.00910.59 |     |      | H   |    |        |        |        |      |
| ATOM       | 355 | HH12 | ARG | 27 | 28.683 | -2.567 | 21.018 |      |
| 1.00999.99 |     |      | H   |    |        |        |        |      |
| ATOM       | 356 | HH21 | ARG | 27 | 26.845 | -1.629 | 18.231 |      |
| 1.00532.54 |     |      | H   |    |        |        |        |      |
| ATOM       | 357 | HH22 | ARG | 27 | 27.577 | -2.947 | 19.082 |      |
| 1.00948.84 |     |      | H   |    |        |        |        |      |
| ATOM       | 358 | N    | SER | 28 | 23.348 | 4.344  | 21.409 | 1.00 |
| 14.60      |     |      | N   |    |        |        |        |      |
| ATOM       | 359 | CA   | SER | 28 | 22.400 | 4.569  | 22.506 | 1.00 |
| 14.92      |     |      | C   |    |        |        |        |      |
| ATOM       | 360 | C    | SER | 28 | 21.115 | 3.778  | 22.280 | 1.00 |
| 12.12      |     |      | C   |    |        |        |        |      |
| ATOM       | 361 | O    | SER | 28 | 20.746 | 3.484  | 21.144 | 1.00 |
| 13.41      |     |      | O   |    |        |        |        |      |

|            |     |     |     |    |        |       |        |      |
|------------|-----|-----|-----|----|--------|-------|--------|------|
| ATOM       | 362 | CB  | SER | 28 | 22.071 | 6.057 | 22.612 | 1.00 |
| 23.26      |     |     | C   |    |        |       |        |      |
| ATOM       | 363 | OG  | SER | 28 | 23.266 | 6.783 | 22.869 |      |
| 1.00146.32 |     |     | O   |    |        |       |        |      |
| ATOM       | 364 | HN  | SER | 28 | 23.024 | 4.372 | 20.483 | 1.00 |
| 15.23      |     |     | H   |    |        |       |        |      |
| ATOM       | 365 | HA  | SER | 28 | 22.844 | 4.246 | 23.439 | 1.00 |
| 15.44      |     |     | H   |    |        |       |        |      |
| ATOM       | 366 | HB1 | SER | 28 | 21.366 | 6.210 | 23.418 | 1.00 |
| 88.73      |     |     | H   |    |        |       |        |      |
| ATOM       | 367 | HB2 | SER | 28 | 21.638 | 6.400 | 21.689 |      |
| 1.00124.68 |     |     | H   |    |        |       |        |      |
| ATOM       | 368 | HG  | SER | 28 | 23.546 | 7.195 | 22.046 |      |
| 1.00242.47 |     |     | H   |    |        |       |        |      |
| ATOM       | 369 | N   | CYS | 29 | 20.439 | 3.441 | 23.374 | 1.00 |
| 10.48      |     |     | N   |    |        |       |        |      |
| ATOM       | 370 | CA  | CYS | 29 | 19.195 | 2.687 | 23.290 | 1.00 |
| 9.97       |     |     | C   |    |        |       |        |      |
| ATOM       | 371 | C   | CYS | 29 | 18.463 | 2.738 | 24.630 | 1.00 |
| 11.60      |     |     | C   |    |        |       |        |      |
| ATOM       | 372 | O   | CYS | 29 | 19.062 | 2.519 | 25.683 | 1.00 |
| 15.64      |     |     | O   |    |        |       |        |      |
| ATOM       | 373 | CB  | CYS | 29 | 19.488 | 1.233 | 22.896 | 1.00 |
| 9.52       |     |     | C   |    |        |       |        |      |
| ATOM       | 374 | SG  | CYS | 29 | 18.064 | 0.533 | 22.053 | 1.00 |
| 10.40      |     |     | S   |    |        |       |        |      |
| ATOM       | 375 | HN  | CYS | 29 | 20.781 | 3.708 | 24.253 | 1.00 |
| 11.10      |     |     | H   |    |        |       |        |      |
| ATOM       | 376 | HA  | CYS | 29 | 18.566 | 3.135 | 22.535 | 1.00 |
| 11.08      |     |     | H   |    |        |       |        |      |
| ATOM       | 377 | HB1 | CYS | 29 | 19.692 | 0.641 | 23.778 | 1.00 |
| 9.33       |     |     | H   |    |        |       |        |      |
| ATOM       | 378 | HB2 | CYS | 29 | 20.340 | 1.198 | 22.238 | 1.00 |
| 10.78      |     |     | H   |    |        |       |        |      |
| ATOM       | 379 | N   | GLU | 30 | 17.170 | 3.037 | 24.582 | 1.00 |
| 13.52      |     |     | N   |    |        |       |        |      |
| ATOM       | 380 | CA  | GLU | 30 | 16.369 | 3.126 | 25.798 | 1.00 |
| 17.41      |     |     | C   |    |        |       |        |      |
| ATOM       | 381 | C   | GLU | 30 | 15.923 | 1.749 | 26.273 | 1.00 |
| 10.81      |     |     | C   |    |        |       |        |      |
| ATOM       | 382 | O   | GLU | 30 | 15.819 | 0.810 | 25.485 | 1.00 |
| 23.22      |     |     | O   |    |        |       |        |      |
| ATOM       | 383 | CB  | GLU | 30 | 15.135 | 3.991 | 25.547 | 1.00 |
| 37.83      |     |     | C   |    |        |       |        |      |
| ATOM       | 384 | CG  | GLU | 30 | 15.566 | 5.398 | 25.143 |      |
| 1.00108.13 |     |     | C   |    |        |       |        |      |
| ATOM       | 385 | CD  | GLU | 30 | 16.211 | 6.104 | 26.331 |      |
| 1.00240.52 |     |     | C   |    |        |       |        |      |
| ATOM       | 386 | OE1 | GLU | 30 | 16.083 | 5.601 | 27.435 |      |
| 1.00422.56 |     |     | O   |    |        |       |        |      |
| ATOM       | 387 | OE2 | GLU | 30 | 16.824 | 7.138 | 26.121 |      |
| 1.00410.81 |     |     | O1- |    |        |       |        |      |

|            |     |     |     |    |        |        |        |      |
|------------|-----|-----|-----|----|--------|--------|--------|------|
| ATOM       | 388 | HN  | GLU | 30 | 16.749 | 3.209  | 23.715 | 1.00 |
| 15.61      |     |     | H   |    |        |        |        |      |
| ATOM       | 389 | HA  | GLU | 30 | 16.960 | 3.588  | 26.574 | 1.00 |
| 24.60      |     |     | H   |    |        |        |        |      |
| ATOM       | 390 | HB1 | GLU | 30 | 14.542 | 4.042  | 26.449 | 1.00 |
| 72.67      |     |     | H   |    |        |        |        |      |
| ATOM       | 391 | HB2 | GLU | 30 | 14.546 | 3.553  | 24.753 | 1.00 |
| 56.47      |     |     | H   |    |        |        |        |      |
| ATOM       | 392 | HG1 | GLU | 30 | 14.701 | 5.956  | 24.823 |      |
| 1.00196.66 |     |     | H   |    |        |        |        |      |
| ATOM       | 393 | HG2 | GLU | 30 | 16.276 | 5.337  | 24.332 |      |
| 1.00140.67 |     |     | H   |    |        |        |        |      |
| ATOM       | 394 | N   | LYS | 31 | 15.644 | 1.651  | 27.572 | 1.00 |
| 11.96      |     |     | N   |    |        |        |        |      |
| ATOM       | 395 | CA  | LYS | 31 | 15.185 | 0.398  | 28.174 | 1.00 |
| 11.40      |     |     | C   |    |        |        |        |      |
| ATOM       | 396 | C   | LYS | 31 | 13.855 | 0.633  | 28.880 | 1.00 |
| 10.99      |     |     | C   |    |        |        |        |      |
| ATOM       | 397 | O   | LYS | 31 | 13.635 | 1.691  | 29.469 | 1.00 |
| 12.86      |     |     | O   |    |        |        |        |      |
| ATOM       | 398 | CB  | LYS | 31 | 16.217 | -0.109 | 29.182 | 1.00 |
| 21.40      |     |     | C   |    |        |        |        |      |
| ATOM       | 399 | CG  | LYS | 31 | 17.528 | -0.425 | 28.458 | 1.00 |
| 57.81      |     |     | C   |    |        |        |        |      |
| ATOM       | 400 | CD  | LYS | 31 | 18.555 | -0.946 | 29.465 |      |
| 1.00115.52 |     |     | C   |    |        |        |        |      |
| ATOM       | 401 | CE  | LYS | 31 | 19.859 | -1.280 | 28.739 |      |
| 1.00250.23 |     |     | C   |    |        |        |        |      |
| ATOM       | 402 | NZ  | LYS | 31 | 20.421 | -0.039 | 28.134 |      |
| 1.00462.10 |     |     | N1+ |    |        |        |        |      |
| ATOM       | 403 | HN  | LYS | 31 | 15.737 | 2.444  | 28.140 | 1.00 |
| 26.13      |     |     | H   |    |        |        |        |      |
| ATOM       | 404 | HA  | LYS | 31 | 15.048 | -0.349 | 27.405 | 1.00 |
| 13.87      |     |     | H   |    |        |        |        |      |
| ATOM       | 405 | HB1 | LYS | 31 | 15.845 | -1.004 | 29.658 | 1.00 |
| 37.63      |     |     | H   |    |        |        |        |      |
| ATOM       | 406 | HB2 | LYS | 31 | 16.390 | 0.650  | 29.931 | 1.00 |
| 47.19      |     |     | H   |    |        |        |        |      |
| ATOM       | 407 | HG1 | LYS | 31 | 17.906 | 0.471  | 27.992 |      |
| 1.00126.32 |     |     | H   |    |        |        |        |      |
| ATOM       | 408 | HG2 | LYS | 31 | 17.348 | -1.177 | 27.703 |      |
| 1.00114.19 |     |     | H   |    |        |        |        |      |
| ATOM       | 409 | HD1 | LYS | 31 | 18.173 | -1.837 | 29.941 |      |
| 1.00198.45 |     |     | H   |    |        |        |        |      |
| ATOM       | 410 | HD2 | LYS | 31 | 18.742 | -0.189 | 30.214 |      |
| 1.00200.14 |     |     | H   |    |        |        |        |      |
| ATOM       | 411 | HE1 | LYS | 31 | 19.663 | -2.002 | 27.960 |      |
| 1.00374.64 |     |     | H   |    |        |        |        |      |
| ATOM       | 412 | HE2 | LYS | 31 | 20.568 | -1.692 | 29.442 |      |
| 1.00403.27 |     |     | H   |    |        |        |        |      |
| ATOM       | 413 | HZ1 | LYS | 31 | 20.650 | 0.640  | 28.887 |      |
| 1.00627.38 |     |     | H   |    |        |        |        |      |



|            |     |      |     |    |        |        |        |      |
|------------|-----|------|-----|----|--------|--------|--------|------|
| ATOM       | 414 | HZ2  | LYS | 31 | 19.721 | 0.379  | 27.489 |      |
| 1.00622.26 |     |      |     |    |        |        |        | H    |
| ATOM       | 415 | HZ3  | LYS | 31 | 21.286 | -0.272 | 27.606 |      |
| 1.00619.20 |     |      |     |    |        |        |        | H    |
| ATOM       | 416 | N    | THR | 32 | 12.967 | -0.352 | 28.813 | 1.00 |
| 15.51      |     |      | N   |    |        |        |        |      |
| ATOM       | 417 | CA   | THR | 32 | 11.655 | -0.228 | 29.446 | 1.00 |
| 22.44      |     |      | C   |    |        |        |        |      |
| ATOM       | 418 | C    | THR | 32 | 11.724 | -0.638 | 30.913 | 1.00 |
| 26.60      |     |      | C   |    |        |        |        |      |
| ATOM       | 419 | O    | THR | 32 | 12.093 | -1.766 | 31.239 | 1.00 |
| 57.43      |     |      | O   |    |        |        |        |      |
| ATOM       | 420 | CB   | THR | 32 | 10.638 | -1.106 | 28.714 | 1.00 |
| 56.28      |     |      | C   |    |        |        |        |      |
| ATOM       | 421 | CG2  | THR | 32 | 9.275  | -0.991 | 29.399 |      |
| 1.00102.70 |     |      |     |    |        |        |        | C    |
| ATOM       | 422 | OG1  | THR | 32 | 10.531 | -0.675 | 27.364 |      |
| 1.00111.17 |     |      |     |    |        |        |        | O    |
| ATOM       | 423 | HN   | THR | 32 | 13.191 | -1.171 | 28.326 | 1.00 |
| 18.79      |     |      | H   |    |        |        |        |      |
| ATOM       | 424 | HA   | THR | 32 | 11.329 | 0.801  | 29.387 | 1.00 |
| 19.67      |     |      | H   |    |        |        |        |      |
| ATOM       | 425 | HB   | THR | 32 | 10.962 | -2.133 | 28.739 | 1.00 |
| 84.25      |     |      | H   |    |        |        |        |      |
| ATOM       | 426 | HG1  | THR | 32 | 9.852  | -1.203 | 26.938 |      |
| 1.00205.03 |     |      |     |    |        |        |        | H    |
| ATOM       | 427 | HG21 | THR | 32 | 9.031  | 0.052  | 29.543 |      |
| 1.00220.71 |     |      |     |    |        |        |        | H    |
| ATOM       | 428 | HG22 | THR | 32 | 9.312  | -1.487 | 30.357 |      |
| 1.00174.67 |     |      |     |    |        |        |        | H    |
| ATOM       | 429 | HG23 | THR | 32 | 8.521  | -1.456 | 28.782 |      |
| 1.00217.44 |     |      |     |    |        |        |        | H    |
| ATOM       | 430 | N    | THR | 33 | 11.359 | 0.290  | 31.791 | 1.00 |
| 22.47      |     |      | N   |    |        |        |        |      |
| ATOM       | 431 | CA   | THR | 33 | 11.374 | 0.032  | 33.228 | 1.00 |
| 41.60      |     |      | C   |    |        |        |        |      |
| ATOM       | 432 | C    | THR | 33 | 10.350 | 0.885  | 33.925 | 1.00 |
| 38.03      |     |      | C   |    |        |        |        |      |
| ATOM       | 433 | O    | THR | 33 | 10.641 | 1.990  | 34.386 | 1.00 |
| 52.73      |     |      | O   |    |        |        |        |      |
| ATOM       | 434 | CB   | THR | 33 | 12.763 | 0.305  | 33.810 | 1.00 |
| 63.25      |     |      | C   |    |        |        |        |      |
| ATOM       | 435 | CG2  | THR | 33 | 13.752 | -0.748 | 33.304 |      |
| 1.00121.65 |     |      |     |    |        |        |        | C    |
| ATOM       | 436 | OG1  | THR | 33 | 13.197 | 1.597  | 33.406 | 1.00 |
| 96.20      |     |      | O   |    |        |        |        |      |
| ATOM       | 437 | HN   | THR | 33 | 11.073 | 1.169  | 31.466 | 1.00 |
| 23.82      |     |      | H   |    |        |        |        |      |
| ATOM       | 438 | HA   | THR | 33 | 11.108 | -0.990 | 33.415 | 1.00 |
| 67.12      |     |      | H   |    |        |        |        |      |
| ATOM       | 439 | HB   | THR | 33 | 12.714 | 0.260  | 34.885 |      |
| 1.00107.59 |     |      |     |    |        |        |        | H    |

|      |            |      |     |    |        |        |        |      |
|------|------------|------|-----|----|--------|--------|--------|------|
| ATOM | 440        | HG1  | THR | 33 | 13.295 | 1.593  | 32.452 |      |
|      | 1.00176.27 |      |     |    |        |        |        | H    |
| ATOM | 441        | HG21 | THR | 33 | 14.669 | -0.678 | 33.868 |      |
|      | 1.00255.23 |      |     |    |        |        |        | H    |
| ATOM | 442        | HG22 | THR | 33 | 13.957 | -0.577 | 32.258 |      |
|      | 1.00245.37 |      |     |    |        |        |        | H    |
| ATOM | 443        | HG23 | THR | 33 | 13.326 | -1.733 | 33.431 |      |
|      | 1.00185.78 |      |     |    |        |        |        | H    |
| ATOM | 444        | N    | GLY | 34 | 9.147  | 0.349  | 34.015 | 1.00 |
|      | 40.93      |      | N   |    |        |        |        |      |
| ATOM | 445        | CA   | GLY | 34 | 8.078  | 1.050  | 34.677 | 1.00 |
|      | 45.59      |      | C   |    |        |        |        |      |
| ATOM | 446        | C    | GLY | 34 | 7.580  | 2.216  | 33.829 | 1.00 |
|      | 40.97      |      | C   |    |        |        |        |      |
| ATOM | 447        | O    | GLY | 34 | 6.381  | 2.353  | 33.585 | 1.00 |
|      | 82.17      |      | O   |    |        |        |        |      |
| ATOM | 448        | HN   | GLY | 34 | 8.984  | -0.541 | 33.639 | 1.00 |
|      | 54.00      |      | H   |    |        |        |        |      |
| ATOM | 449        | HA1  | GLY | 34 | 8.457  | 1.421  | 35.607 | 1.00 |
|      | 54.41      |      | H   |    |        |        |        |      |
| ATOM | 450        | HA2  | GLY | 34 | 7.262  | 0.365  | 34.865 | 1.00 |
|      | 62.09      |      | H   |    |        |        |        |      |
| ATOM | 451        | N    | ASN | 35 | 8.514  | 3.054  | 33.375 | 1.00 |
|      | 32.51      |      | N   |    |        |        |        |      |
| ATOM | 452        | CA   | ASN | 35 | 8.173  | 4.212  | 32.545 | 1.00 |
|      | 33.20      |      | C   |    |        |        |        |      |
| ATOM | 453        | C    | ASN | 35 | 9.074  | 4.270  | 31.316 | 1.00 |
|      | 23.17      |      | C   |    |        |        |        |      |
| ATOM | 454        | O    | ASN | 35 | 10.280 | 4.040  | 31.408 | 1.00 |
|      | 27.01      |      | O   |    |        |        |        |      |
| ATOM | 455        | CB   | ASN | 35 | 8.337  | 5.500  | 33.354 | 1.00 |
|      | 54.51      |      | C   |    |        |        |        |      |
| ATOM | 456        | CG   | ASN | 35 | 7.414  | 5.474  | 34.568 | 1.00 |
|      | 80.73      |      | C   |    |        |        |        |      |
| ATOM | 457        | ND2  | ASN | 35 | 7.869  | 5.855  | 35.730 |      |
|      | 1.00220.46 |      |     |    |        |        |        | N    |
| ATOM | 458        | OD1  | ASN | 35 | 6.247  | 5.098  | 34.454 |      |
|      | 1.00117.80 |      |     |    |        |        |        | O    |
| ATOM | 459        | HN   | ASN | 35 | 9.454  | 2.889  | 33.600 | 1.00 |
|      | 51.15      |      | H   |    |        |        |        |      |
| ATOM | 460        | HA   | ASN | 35 | 7.144  | 4.136  | 32.218 | 1.00 |
|      | 47.21      |      | H   |    |        |        |        |      |
| ATOM | 461        | HB1  | ASN | 35 | 8.087  | 6.347  | 32.733 | 1.00 |
|      | 68.31      |      | H   |    |        |        |        |      |
| ATOM | 462        | HB2  | ASN | 35 | 9.361  | 5.586  | 33.684 | 1.00 |
|      | 57.75      |      | H   |    |        |        |        |      |
| ATOM | 463        | HD21 | ASN | 35 | 8.798  | 6.154  | 35.819 |      |
|      | 1.00405.39 |      |     |    |        |        |        | H    |
| ATOM | 464        | HD22 | ASN | 35 | 7.283  | 5.839  | 36.515 |      |
|      | 1.00245.64 |      |     |    |        |        |        | H    |
| ATOM | 465        | N    | PHE | 36 | 8.481  | 4.573  | 30.166 | 1.00 |
|      | 35.72      |      | N   |    |        |        |        |      |

|            |     |     |     |    |        |        |        |      |
|------------|-----|-----|-----|----|--------|--------|--------|------|
| ATOM       | 466 | CA  | PHE | 36 | 9.226  | 4.656  | 28.921 | 1.00 |
| 33.41      |     |     | C   |    |        |        |        |      |
| ATOM       | 467 | C   | PHE | 36 | 9.867  | 6.034  | 28.772 | 1.00 |
| 28.51      |     |     | C   |    |        |        |        |      |
| ATOM       | 468 | O   | PHE | 36 | 9.334  | 7.030  | 29.262 | 1.00 |
| 45.23      |     |     | O   |    |        |        |        |      |
| ATOM       | 469 | CB  | PHE | 36 | 8.275  | 4.407  | 27.757 | 1.00 |
| 67.53      |     |     | C   |    |        |        |        |      |
| ATOM       | 470 | CG  | PHE | 36 | 7.703  | 3.012  | 27.858 | 1.00 |
| 86.71      |     |     | C   |    |        |        |        |      |
| ATOM       | 471 | CD1 | PHE | 36 | 6.526  | 2.796  | 28.586 |      |
| 1.00106.51 |     |     | C   |    |        |        |        |      |
| ATOM       | 472 | CD2 | PHE | 36 | 8.342  | 1.939  | 27.224 | 1.00 |
| 99.48      |     |     | C   |    |        |        |        |      |
| ATOM       | 473 | CE1 | PHE | 36 | 5.986  | 1.507  | 28.679 |      |
| 1.00134.48 |     |     | C   |    |        |        |        |      |
| ATOM       | 474 | CE2 | PHE | 36 | 7.802  | 0.650  | 27.318 |      |
| 1.00134.27 |     |     | C   |    |        |        |        |      |
| ATOM       | 475 | CZ  | PHE | 36 | 6.625  | 0.435  | 28.045 |      |
| 1.00149.48 |     |     | C   |    |        |        |        |      |
| ATOM       | 476 | HN  | PHE | 36 | 7.518  | 4.742  | 30.150 | 1.00 |
| 62.87      |     |     | H   |    |        |        |        |      |
| ATOM       | 477 | HA  | PHE | 36 | 9.998  | 3.902  | 28.912 | 1.00 |
| 28.53      |     |     | H   |    |        |        |        |      |
| ATOM       | 478 | HB1 | PHE | 36 | 8.809  | 4.507  | 26.832 | 1.00 |
| 73.56      |     |     | H   |    |        |        |        |      |
| ATOM       | 479 | HB2 | PHE | 36 | 7.471  | 5.128  | 27.788 | 1.00 |
| 88.42      |     |     | H   |    |        |        |        |      |
| ATOM       | 480 | HD1 | PHE | 36 | 6.035  | 3.623  | 29.076 |      |
| 1.00110.20 |     |     | H   |    |        |        |        |      |
| ATOM       | 481 | HD2 | PHE | 36 | 9.251  | 2.103  | 26.665 | 1.00 |
| 93.07      |     |     | H   |    |        |        |        |      |
| ATOM       | 482 | HE1 | PHE | 36 | 5.080  | 1.340  | 29.239 |      |
| 1.00155.06 |     |     | H   |    |        |        |        |      |
| ATOM       | 483 | HE2 | PHE | 36 | 8.293  | -0.177 | 26.829 |      |
| 1.00159.46 |     |     | H   |    |        |        |        |      |
| ATOM       | 484 | HZ  | PHE | 36 | 6.210  | -0.560 | 28.116 |      |
| 1.00183.25 |     |     | H   |    |        |        |        |      |
| ATOM       | 485 | N   | THR | 37 | 11.013 | 6.088  | 28.089 | 1.00 |
| 20.06      |     |     | N   |    |        |        |        |      |
| ATOM       | 486 | CA  | THR | 37 | 11.724 | 7.349  | 27.875 | 1.00 |
| 27.18      |     |     | C   |    |        |        |        |      |
| ATOM       | 487 | C   | THR | 37 | 11.958 | 7.574  | 26.385 | 1.00 |
| 41.87      |     |     | C   |    |        |        |        |      |
| ATOM       | 488 | O   | THR | 37 | 11.126 | 7.212  | 25.554 |      |
| 1.00169.86 |     |     | O   |    |        |        |        |      |
| ATOM       | 489 | CB  | THR | 37 | 13.068 | 7.317  | 28.606 | 1.00 |
| 26.52      |     |     | C   |    |        |        |        |      |
| ATOM       | 490 | CG2 | THR | 37 | 12.846 | 6.943  | 30.072 | 1.00 |
| 75.69      |     |     | C   |    |        |        |        |      |
| ATOM       | 491 | OG1 | THR | 37 | 13.915 | 6.357  | 27.993 | 1.00 |
| 81.95      |     |     | O   |    |        |        |        |      |

|            |     |      |     |    |        |        |        |      |
|------------|-----|------|-----|----|--------|--------|--------|------|
| ATOM       | 492 | HN   | THR | 37 | 11.390 | 5.265  | 27.720 | 1.00 |
| 18.47      |     |      | H   |    |        |        |        |      |
| ATOM       | 493 | HA   | THR | 37 | 11.137 | 8.170  | 28.263 | 1.00 |
| 38.80      |     |      | H   |    |        |        |        |      |
| ATOM       | 494 | HB   | THR | 37 | 13.530 | 8.290  | 28.555 | 1.00 |
| 81.60      |     |      | H   |    |        |        |        |      |
| ATOM       | 495 | HG1  | THR | 37 | 14.602 | 6.122  | 28.621 |      |
| 1.00188.80 |     |      | H   |    |        |        |        |      |
| ATOM       | 496 | HG21 | THR | 37 | 12.071 | 7.569  | 30.489 |      |
| 1.00196.98 |     |      | H   |    |        |        |        |      |
| ATOM       | 497 | HG22 | THR | 37 | 13.762 | 7.089  | 30.625 |      |
| 1.00196.23 |     |      | H   |    |        |        |        |      |
| ATOM       | 498 | HG23 | THR | 37 | 12.546 | 5.907  | 30.137 |      |
| 1.00168.92 |     |      | H   |    |        |        |        |      |
| ATOM       | 499 | N    | GLU | 38 | 13.094 | 8.178  | 26.057 | 1.00 |
| 26.53      |     |      | N   |    |        |        |        |      |
| ATOM       | 500 | CA   | GLU | 38 | 13.435 | 8.456  | 24.662 | 1.00 |
| 30.29      |     |      | C   |    |        |        |        |      |
| ATOM       | 501 | C    | GLU | 38 | 14.951 | 8.510  | 24.475 | 1.00 |
| 25.39      |     |      | C   |    |        |        |        |      |
| ATOM       | 502 | O    | GLU | 38 | 15.671 | 9.056  | 25.311 | 1.00 |
| 51.60      |     |      | O   |    |        |        |        |      |
| ATOM       | 503 | CB   | GLU | 38 | 12.819 | 9.790  | 24.232 | 1.00 |
| 54.82      |     |      | C   |    |        |        |        |      |
| ATOM       | 504 | CG   | GLU | 38 | 13.104 | 10.035 | 22.747 |      |
| 1.00165.84 |     |      | C   |    |        |        |        |      |
| ATOM       | 505 | CD   | GLU | 38 | 12.413 | 11.315 | 22.287 |      |
| 1.00292.92 |     |      | C   |    |        |        |        |      |
| ATOM       | 506 | OE1  | GLU | 38 | 11.756 | 11.937 | 23.106 |      |
| 1.00414.19 |     |      | O   |    |        |        |        |      |
| ATOM       | 507 | OE2  | GLU | 38 | 12.552 | 11.653 | 21.124 |      |
| 1.00537.65 |     |      | O1- |    |        |        |        |      |
| ATOM       | 508 | HN   | GLU | 38 | 13.714 | 8.443  | 26.766 | 1.00 |
| 84.50      |     |      | H   |    |        |        |        |      |
| ATOM       | 509 | HA   | GLU | 38 | 13.036 | 7.671  | 24.037 | 1.00 |
| 32.15      |     |      | H   |    |        |        |        |      |
| ATOM       | 510 | HB1  | GLU | 38 | 13.248 | 10.591 | 24.816 |      |
| 1.00144.82 |     |      | H   |    |        |        |        |      |
| ATOM       | 511 | HB2  | GLU | 38 | 11.750 | 9.760  | 24.393 |      |
| 1.00106.49 |     |      | H   |    |        |        |        |      |
| ATOM       | 512 | HG1  | GLU | 38 | 12.734 | 9.202  | 22.169 |      |
| 1.00303.31 |     |      | H   |    |        |        |        |      |
| ATOM       | 513 | HG2  | GLU | 38 | 14.169 | 10.130 | 22.598 |      |
| 1.00323.99 |     |      | H   |    |        |        |        |      |
| ATOM       | 514 | N    | CYS | 39 | 15.422 | 7.938  | 23.371 | 1.00 |
| 15.84      |     |      | N   |    |        |        |        |      |
| ATOM       | 515 | CA   | CYS | 39 | 16.851 | 7.925  | 23.075 | 1.00 |
| 14.30      |     |      | C   |    |        |        |        |      |
| ATOM       | 516 | C    | CYS | 39 | 17.393 | 9.360  | 23.042 | 1.00 |
| 22.31      |     |      | C   |    |        |        |        |      |
| ATOM       | 517 | O    | CYS | 39 | 16.650 | 10.296 | 22.747 | 1.00 |
| 32.92      |     |      | O   |    |        |        |        |      |

|            |     |     |     |    |        |        |        |      |
|------------|-----|-----|-----|----|--------|--------|--------|------|
| ATOM       | 518 | CB  | CYS | 39 | 17.084 | 7.240  | 21.721 | 1.00 |
| 18.08      |     |     | C   |    |        |        |        |      |
| ATOM       | 519 | SG  | CYS | 39 | 15.779 | 7.727  | 20.566 | 1.00 |
| 17.41      |     |     | S   |    |        |        |        |      |
| ATOM       | 520 | HN  | CYS | 39 | 14.800 | 7.521  | 22.741 | 1.00 |
| 24.87      |     |     | H   |    |        |        |        |      |
| ATOM       | 521 | HA  | CYS | 39 | 17.358 | 7.362  | 23.843 | 1.00 |
| 14.60      |     |     | H   |    |        |        |        |      |
| ATOM       | 522 | HB1 | CYS | 39 | 17.065 | 6.168  | 21.853 | 1.00 |
| 27.71      |     |     | H   |    |        |        |        |      |
| ATOM       | 523 | HB2 | CYS | 39 | 18.043 | 7.536  | 21.322 | 1.00 |
| 34.91      |     |     | H   |    |        |        |        |      |
| ATOM       | 524 | N   | PRO | 40 | 18.658 | 9.557  | 23.340 | 1.00 |
| 27.27      |     |     | N   |    |        |        |        |      |
| ATOM       | 525 | CA  | PRO | 40 | 19.275 | 10.915 | 23.343 | 1.00 |
| 47.66      |     |     | C   |    |        |        |        |      |
| ATOM       | 526 | C   | PRO | 40 | 19.502 | 11.437 | 21.926 | 1.00 |
| 71.54      |     |     | C   |    |        |        |        |      |
| ATOM       | 527 | O   | PRO | 40 | 19.590 | 10.666 | 20.971 | 1.00 |
| 87.70      |     |     | O   |    |        |        |        |      |
| ATOM       | 528 | CB  | PRO | 40 | 20.600 | 10.703 | 24.083 | 1.00 |
| 53.85      |     |     | C   |    |        |        |        |      |
| ATOM       | 529 | CG  | PRO | 40 | 20.967 | 9.287  | 23.789 | 1.00 |
| 46.04      |     |     | C   |    |        |        |        |      |
| ATOM       | 530 | CD  | PRO | 40 | 19.642 | 8.521  | 23.703 | 1.00 |
| 25.70      |     |     | C   |    |        |        |        |      |
| ATOM       | 531 | HA  | PRO | 40 | 18.658 | 11.604 | 23.897 | 1.00 |
| 58.04      |     |     | H   |    |        |        |        |      |
| ATOM       | 532 | HB1 | PRO | 40 | 20.462 | 10.836 | 25.146 | 1.00 |
| 67.93      |     |     | H   |    |        |        |        |      |
| ATOM       | 533 | HB2 | PRO | 40 | 21.359 | 11.382 | 23.713 | 1.00 |
| 70.99      |     |     | H   |    |        |        |        |      |
| ATOM       | 534 | HG1 | PRO | 40 | 21.575 | 8.881  | 24.582 | 1.00 |
| 65.91      |     |     | H   |    |        |        |        |      |
| ATOM       | 535 | HG2 | PRO | 40 | 21.497 | 9.230  | 22.845 | 1.00 |
| 54.99      |     |     | H   |    |        |        |        |      |
| ATOM       | 536 | HD1 | PRO | 40 | 19.392 | 8.085  | 24.658 | 1.00 |
| 24.22      |     |     | H   |    |        |        |        |      |
| ATOM       | 537 | HD2 | PRO | 40 | 19.694 | 7.766  | 22.937 | 1.00 |
| 26.94      |     |     | H   |    |        |        |        |      |
| ATOM       | 538 | N   | GLY | 41 | 19.595 | 12.756 | 21.806 |      |
| 1.00105.24 |     |     | N   |    |        |        |        |      |
| ATOM       | 539 | CA  | GLY | 41 | 19.811 | 13.401 | 20.510 |      |
| 1.00147.55 |     |     | C   |    |        |        |        |      |
| ATOM       | 540 | C   | GLY | 41 | 21.273 | 13.793 | 20.332 |      |
| 1.00161.74 |     |     | C   |    |        |        |        |      |
| ATOM       | 541 | O   | GLY | 41 | 22.079 | 13.011 | 19.829 |      |
| 1.00244.37 |     |     | O   |    |        |        |        |      |
| ATOM       | 542 | HN  | GLY | 41 | 19.516 | 13.308 | 22.608 |      |
| 1.00121.79 |     |     | H   |    |        |        |        |      |
| ATOM       | 543 | HA1 | GLY | 41 | 19.202 | 14.290 | 20.453 |      |
| 1.00184.40 |     |     | H   |    |        |        |        |      |

|            |     |      |     |    |        |        |        |
|------------|-----|------|-----|----|--------|--------|--------|
| ATOM       | 544 | HA2  | GLY | 41 | 19.524 | 12.725 | 19.714 |
| 1.00157.34 |     |      | H   |    |        |        |        |
| ATOM       | 545 | N    | LEU | 42 | 21.606 | 15.012 | 20.742 |
| 1.00162.48 |     |      | N   |    |        |        |        |
| ATOM       | 546 | CA   | LEU | 42 | 22.975 | 15.504 | 20.617 |
| 1.00191.48 |     |      | C   |    |        |        |        |
| ATOM       | 547 | C    | LEU | 42 | 23.865 | 14.904 | 21.702 |
| 1.00166.66 |     |      | C   |    |        |        |        |
| ATOM       | 548 | O    | LEU | 42 | 23.429 | 14.702 | 22.836 |
| 1.00251.38 |     |      | O   |    |        |        |        |
| ATOM       | 549 | CB   | LEU | 42 | 22.992 | 17.030 | 20.732 |
| 1.00307.99 |     |      | C   |    |        |        |        |
| ATOM       | 550 | CG   | LEU | 42 | 22.056 | 17.646 | 19.685 |
| 1.00452.28 |     |      | C   |    |        |        |        |
| ATOM       | 551 | CD1  | LEU | 42 | 22.056 | 19.170 | 19.847 |
| 1.00681.24 |     |      | C   |    |        |        |        |
| ATOM       | 552 | CD2  | LEU | 42 | 22.531 | 17.277 | 18.268 |
| 1.00527.46 |     |      | C   |    |        |        |        |
| ATOM       | 553 | HN   | LEU | 42 | 20.920 | 15.594 | 21.131 |
| 1.00195.47 |     |      | H   |    |        |        |        |
| ATOM       | 554 | HA   | LEU | 42 | 23.365 | 15.222 | 19.652 |
| 1.00229.77 |     |      | H   |    |        |        |        |
| ATOM       | 555 | HB1  | LEU | 42 | 23.997 | 17.391 | 20.570 |
| 1.00342.49 |     |      | H   |    |        |        |        |
| ATOM       | 556 | HB2  | LEU | 42 | 22.664 | 17.319 | 21.721 |
| 1.00335.33 |     |      | H   |    |        |        |        |
| ATOM       | 557 | HG   | LEU | 42 | 21.054 | 17.272 | 19.839 |
| 1.00427.79 |     |      | H   |    |        |        |        |
| ATOM       | 558 | HD11 | LEU | 42 | 23.016 | 19.565 | 19.551 |
| 1.00909.71 |     |      | H   |    |        |        |        |
| ATOM       | 559 | HD12 | LEU | 42 | 21.866 | 19.421 | 20.880 |
| 1.00706.80 |     |      | H   |    |        |        |        |
| ATOM       | 560 | HD13 | LEU | 42 | 21.283 | 19.598 | 19.224 |
| 1.00858.82 |     |      | H   |    |        |        |        |
| ATOM       | 561 | HD21 | LEU | 42 | 22.150 | 16.300 | 18.006 |
| 1.00631.69 |     |      | H   |    |        |        |        |
| ATOM       | 562 | HD22 | LEU | 42 | 23.612 | 17.262 | 18.236 |
| 1.00628.06 |     |      | H   |    |        |        |        |
| ATOM       | 563 | HD23 | LEU | 42 | 22.161 | 18.004 | 17.558 |
| 1.00656.75 |     |      | H   |    |        |        |        |
| ATOM       | 564 | N    | THR | 43 | 25.114 | 14.624 | 21.343 |
| 1.00178.52 |     |      | N   |    |        |        |        |
| ATOM       | 565 | CA   | THR | 43 | 26.062 | 14.049 | 22.290 |
| 1.00240.84 |     |      | C   |    |        |        |        |
| ATOM       | 566 | C    | THR | 43 | 26.488 | 15.104 | 23.318 |
| 1.00372.31 |     |      | C   |    |        |        |        |
| ATOM       | 567 | O    | THR | 43 | 26.514 | 16.295 | 23.006 |
| 1.00500.13 |     |      | O   |    |        |        |        |
| ATOM       | 568 | CB   | THR | 43 | 27.292 | 13.546 | 21.525 |
| 1.00354.13 |     |      | C   |    |        |        |        |
| ATOM       | 569 | CG2  | THR | 43 | 26.850 | 12.572 | 20.431 |
| 1.00463.04 |     |      | C   |    |        |        |        |

|            |     |      |     |    |        |        |        |
|------------|-----|------|-----|----|--------|--------|--------|
| ATOM       | 570 | OG1  | THR | 43 | 27.964 | 14.650 | 20.936 |
| 1.00508.50 |     |      | O   |    |        |        |        |
| ATOM       | 571 | HN   | THR | 43 | 25.403 | 14.809 | 20.426 |
| 1.00229.59 |     |      | H   |    |        |        |        |
| ATOM       | 572 | HA   | THR | 43 | 25.594 | 13.219 | 22.790 |
| 1.00249.90 |     |      | H   |    |        |        |        |
| ATOM       | 573 | HB   | THR | 43 | 27.961 | 13.039 | 22.201 |
| 1.00481.58 |     |      | H   |    |        |        |        |
| ATOM       | 574 | HG1  | THR | 43 | 28.468 | 14.325 | 20.186 |
| 1.00624.31 |     |      | H   |    |        |        |        |
| ATOM       | 575 | HG21 | THR | 43 | 26.270 | 11.776 | 20.872 |
| 1.00650.95 |     |      | H   |    |        |        |        |
| ATOM       | 576 | HG22 | THR | 43 | 27.719 | 12.159 | 19.943 |
| 1.00580.73 |     |      | H   |    |        |        |        |
| ATOM       | 577 | HG23 | THR | 43 | 26.246 | 13.098 | 19.705 |
| 1.00571.99 |     |      | H   |    |        |        |        |
| ATOM       | 578 | N    | PRO | 44 | 26.829 | 14.709 | 24.527 |
| 1.00488.39 |     |      | N   |    |        |        |        |
| ATOM       | 579 | CA   | PRO | 44 | 27.263 | 15.670 | 25.583 |
| 1.00760.13 |     |      | C   |    |        |        |        |
| ATOM       | 580 | C    | PRO | 44 | 28.692 | 16.156 | 25.350 |
| 1.00735.36 |     |      | C   |    |        |        |        |
| ATOM       | 581 | O    | PRO | 44 | 29.167 | 17.069 | 26.025 |
| 1.00999.99 |     |      | O   |    |        |        |        |
| ATOM       | 582 | CB   | PRO | 44 | 27.154 | 14.851 | 26.873 |
| 1.00999.99 |     |      | C   |    |        |        |        |
| ATOM       | 583 | CG   | PRO | 44 | 27.424 | 13.447 | 26.445 |
| 1.00856.94 |     |      | C   |    |        |        |        |
| ATOM       | 584 | CD   | PRO | 44 | 26.841 | 13.318 | 25.031 |
| 1.00548.09 |     |      | C   |    |        |        |        |
| ATOM       | 585 | HA   | PRO | 44 | 26.586 | 16.510 | 25.627 |
| 1.00939.00 |     |      | H   |    |        |        |        |
| ATOM       | 586 | HB1  | PRO | 44 | 26.158 | 14.928 | 27.285 |
| 1.00999.99 |     |      | H   |    |        |        |        |
| ATOM       | 587 | HB2  | PRO | 44 | 27.889 | 15.181 | 27.599 |
| 1.00999.99 |     |      | H   |    |        |        |        |
| ATOM       | 588 | HG1  | PRO | 44 | 26.933 | 12.749 | 27.108 |
| 1.00999.99 |     |      | H   |    |        |        |        |
| ATOM       | 589 | HG2  | PRO | 44 | 28.490 | 13.262 | 26.431 |
| 1.00853.53 |     |      | H   |    |        |        |        |
| ATOM       | 590 | HD1  | PRO | 44 | 25.837 | 12.925 | 25.070 |
| 1.00602.45 |     |      | H   |    |        |        |        |
| ATOM       | 591 | HD2  | PRO | 44 | 27.475 | 12.693 | 24.420 |
| 1.00463.32 |     |      | H   |    |        |        |        |
| ATOM       | 592 | N    | ILE | 45 | 29.372 | 15.532 | 24.393 |
| 1.00518.33 |     |      | N   |    |        |        |        |
| ATOM       | 593 | CA   | ILE | 45 | 30.747 | 15.900 | 24.082 |
| 1.00582.79 |     |      | C   |    |        |        |        |
| ATOM       | 594 | C    | ILE | 45 | 30.808 | 17.312 | 23.510 |
| 1.00795.93 |     |      | C   |    |        |        |        |
| ATOM       | 595 | O    | ILE | 45 | 30.079 | 17.649 | 22.577 |
| 1.00898.75 |     |      | O   |    |        |        |        |

|            |     |      |     |    |        |        |        |
|------------|-----|------|-----|----|--------|--------|--------|
| ATOM       | 596 | CB   | ILE | 45 | 31.336 | 14.914 | 23.071 |
| 1.00474.41 |     |      |     | C  |        |        |        |
| ATOM       | 597 | CG1  | ILE | 45 | 31.384 | 13.516 | 23.692 |
| 1.00516.90 |     |      |     | C  |        |        |        |
| ATOM       | 598 | CG2  | ILE | 45 | 32.753 | 15.353 | 22.696 |
| 1.00760.75 |     |      |     | C  |        |        |        |
| ATOM       | 599 | CD1  | ILE | 45 | 31.721 | 12.488 | 22.611 |
| 1.00566.81 |     |      |     | C  |        |        |        |
| ATOM       | 600 | HN   | ILE | 45 | 28.942 | 14.808 | 23.891 |
| 1.00395.72 |     |      |     | H  |        |        |        |
| ATOM       | 601 | HA   | ILE | 45 | 31.331 | 15.861 | 24.988 |
| 1.00711.06 |     |      |     | H  |        |        |        |
| ATOM       | 602 | HB   | ILE | 45 | 30.718 | 14.895 | 22.184 |
| 1.00477.81 |     |      |     | H  |        |        |        |
| ATOM       | 603 | HG11 | ILE | 45 | 30.421 | 13.280 | 24.123 |
| 1.00624.28 |     |      |     | H  |        |        |        |
| ATOM       | 604 | HG12 | ILE | 45 | 32.139 | 13.491 | 24.463 |
| 1.00744.84 |     |      |     | H  |        |        |        |
| ATOM       | 605 | HG21 | ILE | 45 | 33.309 | 15.579 | 23.594 |
| 1.00920.57 |     |      |     | H  |        |        |        |
| ATOM       | 606 | HG22 | ILE | 45 | 32.705 | 16.233 | 22.071 |
| 1.00999.99 |     |      |     | H  |        |        |        |
| ATOM       | 607 | HG23 | ILE | 45 | 33.246 | 14.558 | 22.158 |
| 1.00865.46 |     |      |     | H  |        |        |        |
| ATOM       | 608 | HD11 | ILE | 45 | 30.905 | 12.422 | 21.908 |
| 1.00658.89 |     |      |     | H  |        |        |        |
| ATOM       | 609 | HD12 | ILE | 45 | 31.879 | 11.523 | 23.070 |
| 1.00734.30 |     |      |     | H  |        |        |        |
| ATOM       | 610 | HD13 | ILE | 45 | 32.619 | 12.791 | 22.093 |
| 1.00675.84 |     |      |     | H  |        |        |        |
| ATOM       | 611 | N    | ALA | 46 | 31.686 | 18.135 | 24.075 |
| 1.00999.99 |     |      |     | N  |        |        |        |
| ATOM       | 612 | CA   | ALA | 46 | 31.838 | 19.511 | 23.615 |
| 1.00999.99 |     |      |     | C  |        |        |        |
| ATOM       | 613 | C    | ALA | 46 | 32.083 | 19.549 | 22.110 |
| 1.00999.99 |     |      |     | C  |        |        |        |
| ATOM       | 614 | CB   | ALA | 46 | 33.007 | 20.178 | 24.341 |
| 1.00999.99 |     |      |     | C  |        |        |        |
| ATOM       | 615 | OT1  | ALA | 46 | 32.851 | 18.728 | 21.633 |
| 1.00999.99 |     |      |     | O  |        |        |        |
| ATOM       | 616 | OT2  | ALA | 46 | 31.499 | 20.396 | 21.455 |
| 1.00999.99 |     |      |     | O  |        |        |        |
| ATOM       | 617 | HN   | ALA | 46 | 32.242 | 17.811 | 24.815 |
| 1.00999.99 |     |      |     | H  |        |        |        |
| ATOM       | 618 | HA   | ALA | 46 | 30.932 | 20.056 | 23.836 |
| 1.00999.99 |     |      |     | H  |        |        |        |
| ATOM       | 619 | HB1  | ALA | 46 | 33.936 | 19.742 | 24.005 |
| 1.00999.99 |     |      |     | H  |        |        |        |
| ATOM       | 620 | HB2  | ALA | 46 | 32.902 | 20.031 | 25.405 |
| 1.00999.99 |     |      |     | H  |        |        |        |
| ATOM       | 621 | HB3  | ALA | 46 | 33.008 | 21.237 | 24.123 |
| 1.00999.99 |     |      |     | H  |        |        |        |



```

ENDMDL
TER
MODEL      18
ATOM       1  N   GLY      1      24.815   4.662  10.387
1.00999.99
ATOM       2  CA  GLY      1      24.690   4.279  11.823
1.00999.99
ATOM       3  C   GLY      1      23.215   4.205  12.204
1.00999.99
ATOM       4  O   GLY      1      22.733   4.996  13.015
1.00999.99
ATOM       5  HA1 GLY      1      25.180   5.020  12.436
1.00999.99
ATOM       6  HA2 GLY      1      25.153   3.315  11.980
1.00999.99
ATOM       7  HT1 GLY      1      24.124   4.126   9.823
1.00999.99
ATOM       8  HT2 GLY      1      25.777   4.446  10.054
1.00999.99
ATOM       9  HT3 GLY      1      24.629   5.679  10.281
1.00999.99
ATOM      10  N   LEU      2      22.502   3.248  11.611
1.00999.99
ATOM      11  CA  LEU      2      21.074   3.065  11.888
1.00895.59
ATOM      12  C   LEU      2      20.826   1.701  12.526
1.00532.27
ATOM      13  O   LEU      2      21.483   0.718  12.182
1.00625.21
ATOM      14  CB  LEU      2      20.277   3.163  10.585
1.00999.99
ATOM      15  CG  LEU      2      20.562   4.502   9.893
1.00999.99
ATOM      16  CD1 LEU      2      19.808   4.551   8.562
1.00999.99
ATOM      17  CD2 LEU      2      20.105   5.667  10.789
1.00999.99
ATOM      18  HN  LEU      2      22.945   2.648  10.974
1.00999.99
ATOM      19  HA  LEU      2      20.730   3.832  12.567
1.00890.87
ATOM      20  HB1 LEU      2      19.221   3.093  10.804
1.00924.07
ATOM      21  HB2 LEU      2      20.562   2.353   9.929
1.00999.99
ATOM      22  HG  LEU      2      21.623   4.586   9.705
1.00999.99
ATOM      23  HD11 LEU     2      20.123   5.418   8.001
1.00999.99
ATOM      24  HD12 LEU     2      18.746   4.610   8.751
1.00999.99
ATOM      25  HD13 LEU     2      20.023   3.658   7.993

```

|            |    |      |     |   |   |        |        |        |      |  |
|------------|----|------|-----|---|---|--------|--------|--------|------|--|
| 1.00999.99 |    |      |     |   |   |        |        |        |      |  |
| ATOM       | 26 | HD21 | LEU | H | 2 | 19.195 | 5.396  | 11.304 |      |  |
| 1.00999.99 |    |      |     |   |   |        |        |        |      |  |
| ATOM       | 27 | HD22 | LEU | H | 2 | 19.925 | 6.545  | 10.183 |      |  |
| 1.00999.99 |    |      |     |   |   |        |        |        |      |  |
| ATOM       | 28 | HD23 | LEU | H | 2 | 20.876 | 5.890  | 11.512 |      |  |
| 1.00999.99 |    |      |     |   |   |        |        |        |      |  |
| ATOM       | 29 | N    | CYS | H | 3 | 19.873 | 1.649  | 13.450 |      |  |
| 1.00271.28 |    |      |     |   |   |        |        |        |      |  |
| ATOM       | 30 | CA   | CYS | N | 3 | 19.545 | 0.399  | 14.124 |      |  |
| 1.00104.50 |    |      |     |   |   |        |        |        |      |  |
| ATOM       | 31 | C    | CYS | C | 3 | 18.677 | -0.474 | 13.222 | 1.00 |  |
| 90.98      |    |      | C   |   |   |        |        |        |      |  |
| ATOM       | 32 | O    | CYS |   | 3 | 18.394 | -0.110 | 12.080 |      |  |
| 1.00207.28 |    |      |     |   |   |        |        |        |      |  |
| ATOM       | 33 | CB   | CYS | O | 3 | 18.803 | 0.682  | 15.433 | 1.00 |  |
| 37.83      |    |      | C   |   |   |        |        |        |      |  |
| ATOM       | 34 | SG   | CYS |   | 3 | 19.838 | 1.714  | 16.502 | 1.00 |  |
| 81.56      |    |      | S   |   |   |        |        |        |      |  |
| ATOM       | 35 | HN   | CYS |   | 3 | 19.380 | 2.464  | 13.680 |      |  |
| 1.00296.55 |    |      |     |   |   |        |        |        |      |  |
| ATOM       | 36 | HA   | CYS | H | 3 | 20.459 | -0.130 | 14.348 |      |  |
| 1.00166.45 |    |      |     |   |   |        |        |        |      |  |
| ATOM       | 37 | HB1  | CYS | H | 3 | 18.589 | -0.251 | 15.933 | 1.00 |  |
| 40.38      |    |      | H   |   |   |        |        |        |      |  |
| ATOM       | 38 | HB2  | CYS |   | 3 | 17.879 | 1.195  | 15.221 | 1.00 |  |
| 98.45      |    |      | H   |   |   |        |        |        |      |  |
| ATOM       | 39 | N    | SER |   | 4 | 18.264 | -1.627 | 13.735 | 1.00 |  |
| 85.31      |    |      | N   |   |   |        |        |        |      |  |
| ATOM       | 40 | CA   | SER |   | 4 | 17.436 | -2.544 | 12.959 | 1.00 |  |
| 92.94      |    |      | C   |   |   |        |        |        |      |  |
| ATOM       | 41 | C    | SER |   | 4 | 16.148 | -1.861 | 12.531 | 1.00 |  |
| 67.37      |    |      | C   |   |   |        |        |        |      |  |
| ATOM       | 42 | O    | SER |   | 4 | 15.707 | -1.997 | 11.390 |      |  |
| 1.00102.28 |    |      |     |   |   |        |        |        |      |  |
| ATOM       | 43 | CB   | SER | O | 4 | 17.068 | -3.760 | 13.803 |      |  |
| 1.00123.83 |    |      |     |   |   |        |        |        |      |  |
| ATOM       | 44 | OG   | SER | C | 4 | 16.405 | -4.714 | 12.984 |      |  |
| 1.00178.89 |    |      |     |   |   |        |        |        |      |  |
| ATOM       | 45 | HN   | SER | O | 4 | 18.525 | -1.869 | 14.649 |      |  |
| 1.00163.03 |    |      |     |   |   |        |        |        |      |  |
| ATOM       | 46 | HA   | SER | H | 4 | 17.979 | -2.870 | 12.086 |      |  |
| 1.00129.78 |    |      |     |   |   |        |        |        |      |  |
| ATOM       | 47 | HB1  | SER | H | 4 | 16.406 | -3.443 | 14.603 |      |  |
| 1.00105.26 |    |      |     |   |   |        |        |        |      |  |
| ATOM       | 48 | HB2  | SER | H | 4 | 17.957 | -4.200 | 14.223 |      |  |
| 1.00156.87 |    |      |     |   |   |        |        |        |      |  |
| ATOM       | 49 | HG   | SER | H | 4 | 16.467 | -5.569 | 13.415 |      |  |
| 1.00218.16 |    |      |     |   |   |        |        |        |      |  |
| ATOM       | 50 | N    | GLU | H | 5 | 15.537 | -1.148 | 13.469 | 1.00 |  |
| 41.67      |    |      | N   |   |   |        |        |        |      |  |
| ATOM       | 51 | CA   | GLU |   | 5 | 14.279 | -0.465 | 13.203 | 1.00 |  |

|            |    |      |     |   |        |        |        |      |  |
|------------|----|------|-----|---|--------|--------|--------|------|--|
| 41.21      |    |      | C   |   |        |        |        |      |  |
| ATOM       | 52 | C    | GLU | 5 | 14.120 | 0.746  | 14.107 | 1.00 |  |
| 41.92      |    |      | C   |   |        |        |        |      |  |
| ATOM       | 53 | O    | GLU | 5 | 13.072 | 0.947  | 14.721 | 1.00 |  |
| 74.72      |    |      | O   |   |        |        |        |      |  |
| ATOM       | 54 | CB   | GLU | 5 | 13.130 | -1.434 | 13.424 | 1.00 |  |
| 49.24      |    |      | C   |   |        |        |        |      |  |
| ATOM       | 55 | CG   | GLU | 5 | 13.228 | -2.026 | 14.824 | 1.00 |  |
| 55.48      |    |      | C   |   |        |        |        |      |  |
| ATOM       | 56 | CD   | GLU | 5 | 12.202 | -3.141 | 14.994 | 1.00 |  |
| 92.06      |    |      | C   |   |        |        |        |      |  |
| ATOM       | 57 | OE1  | GLU | 5 | 11.472 | -3.397 | 14.051 |      |  |
| 1.00206.49 |    |      | O   |   |        |        |        |      |  |
| ATOM       | 58 | OE2  | GLU | 5 | 12.161 | -3.722 | 16.067 |      |  |
| 1.00197.24 |    |      | O1- |   |        |        |        |      |  |
| ATOM       | 59 | HN   | GLU | 5 | 15.931 | -1.096 | 14.364 | 1.00 |  |
| 45.52      |    |      | H   |   |        |        |        |      |  |
| ATOM       | 60 | HA   | GLU | 5 | 14.263 | -0.143 | 12.181 | 1.00 |  |
| 60.63      |    |      | H   |   |        |        |        |      |  |
| ATOM       | 61 | HB1  | GLU | 5 | 13.196 | -2.221 | 12.698 | 1.00 |  |
| 61.59      |    |      | H   |   |        |        |        |      |  |
| ATOM       | 62 | HB2  | GLU | 5 | 12.196 | -0.916 | 13.316 | 1.00 |  |
| 63.66      |    |      | H   |   |        |        |        |      |  |
| ATOM       | 63 | HG1  | GLU | 5 | 13.044 | -1.254 | 15.556 | 1.00 |  |
| 58.03      |    |      | H   |   |        |        |        |      |  |
| ATOM       | 64 | HG2  | GLU | 5 | 14.219 | -2.424 | 14.965 | 1.00 |  |
| 57.77      |    |      | H   |   |        |        |        |      |  |
| ATOM       | 65 | N    | ASN | 6 | 15.179 | 1.538  | 14.180 | 1.00 |  |
| 50.73      |    |      | N   |   |        |        |        |      |  |
| ATOM       | 66 | CA   | ASN | 6 | 15.197 | 2.747  | 15.007 | 1.00 |  |
| 71.04      |    |      | C   |   |        |        |        |      |  |
| ATOM       | 67 | C    | ASN | 6 | 14.967 | 2.422  | 16.482 | 1.00 |  |
| 65.17      |    |      | C   |   |        |        |        |      |  |
| ATOM       | 68 | O    | ASN | 6 | 15.056 | 3.296  | 17.343 | 1.00 |  |
| 94.86      |    |      | O   |   |        |        |        |      |  |
| ATOM       | 69 | CB   | ASN | 6 | 14.128 | 3.732  | 14.529 | 1.00 |  |
| 94.83      |    |      | C   |   |        |        |        |      |  |
| ATOM       | 70 | CG   | ASN | 6 | 14.551 | 4.369  | 13.210 |      |  |
| 1.00160.94 |    |      | C   |   |        |        |        |      |  |
| ATOM       | 71 | ND2  | ASN | 6 | 13.650 | 4.914  | 12.442 |      |  |
| 1.00244.88 |    |      | N   |   |        |        |        |      |  |
| ATOM       | 72 | OD1  | ASN | 6 | 15.735 | 4.366  | 12.870 |      |  |
| 1.00219.73 |    |      | O   |   |        |        |        |      |  |
| ATOM       | 73 | HN   | ASN | 6 | 15.976 | 1.300  | 13.663 | 1.00 |  |
| 72.81      |    |      | H   |   |        |        |        |      |  |
| ATOM       | 74 | HA   | ASN | 6 | 16.164 | 3.217  | 14.907 | 1.00 |  |
| 96.02      |    |      | H   |   |        |        |        |      |  |
| ATOM       | 75 | HB1  | ASN | 6 | 14.001 | 4.497  | 15.273 |      |  |
| 1.00111.09 |    |      | H   |   |        |        |        |      |  |
| ATOM       | 76 | HB2  | ASN | 6 | 13.193 | 3.213  | 14.391 | 1.00 |  |
| 98.13      |    |      | H   |   |        |        |        |      |  |
| ATOM       | 77 | HD21 | ASN | 6 | 12.707 | 4.914  | 12.714 |      |  |

|            |     |      |     |     |   |        |        |        |      |
|------------|-----|------|-----|-----|---|--------|--------|--------|------|
| 1.00272.43 |     |      |     | H   |   |        |        |        |      |
| ATOM       | 78  | HD22 | ASN |     | 6 | 13.913 | 5.326  | 11.592 |      |
| 1.00336.78 |     |      |     | H   |   |        |        |        |      |
| ATOM       | 79  | N    | GLY |     | 7 | 14.672 | 1.163  | 16.759 | 1.00 |
| 51.80      |     |      | N   |     |   |        |        |        |      |
| ATOM       | 80  | CA   | GLY |     | 7 | 14.430 | 0.717  | 18.128 | 1.00 |
| 71.47      |     |      | C   |     |   |        |        |        |      |
| ATOM       | 81  | C    | GLY |     | 7 | 14.700 | -0.774 | 18.257 | 1.00 |
| 41.04      |     |      | C   |     |   |        |        |        |      |
| ATOM       | 82  | O    | GLY |     | 7 | 13.808 | -1.553 | 18.593 | 1.00 |
| 44.54      |     |      | O   |     |   |        |        |        |      |
| ATOM       | 83  | HN   | GLY |     | 7 | 14.617 | 0.522  | 16.032 | 1.00 |
| 45.49      |     |      | H   |     |   |        |        |        |      |
| ATOM       | 84  | HA1  | GLY |     | 7 | 13.405 | 0.911  | 18.386 |      |
| 1.00103.52 |     |      |     | H   |   |        |        |        |      |
| ATOM       | 85  | HA2  | GLY |     | 7 | 15.079 | 1.257  | 18.802 |      |
| 1.00108.67 |     |      |     | H   |   |        |        |        |      |
| ATOM       | 86  | N    | ASP |     | 8 | 15.936 | -1.161 | 17.981 | 1.00 |
| 27.00      |     |      | N   |     |   |        |        |        |      |
| ATOM       | 87  | CA   | ASP |     | 8 | 16.327 | -2.557 | 18.059 | 1.00 |
| 14.15      |     |      | C   |     |   |        |        |        |      |
| ATOM       | 88  | C    | ASP |     | 8 | 16.150 | -3.090 | 19.477 | 1.00 |
| 9.37       |     |      | C   |     |   |        |        |        |      |
| ATOM       | 89  | O    | ASP |     | 8 | 15.893 | -4.277 | 19.675 | 1.00 |
| 14.61      |     |      | O   |     |   |        |        |        |      |
| ATOM       | 90  | CB   | ASP |     | 8 | 17.785 | -2.703 | 17.622 | 1.00 |
| 15.06      |     |      | C   |     |   |        |        |        |      |
| ATOM       | 91  | CG   | ASP |     | 8 | 18.692 | -1.859 | 18.510 | 1.00 |
| 21.22      |     |      | C   |     |   |        |        |        |      |
| ATOM       | 92  | OD1  | ASP |     | 8 | 19.894 | -1.906 | 18.307 |      |
| 1.00119.56 |     |      |     | O   |   |        |        |        |      |
| ATOM       | 93  | OD2  | ASP |     | 8 | 18.173 | -1.179 | 19.378 |      |
| 1.00133.27 |     |      |     | O1- |   |        |        |        |      |
| ATOM       | 94  | HN   | ASP |     | 8 | 16.597 | -0.495 | 17.715 | 1.00 |
| 35.63      |     |      | H   |     |   |        |        |        |      |
| ATOM       | 95  | HA   | ASP |     | 8 | 15.706 | -3.132 | 17.391 | 1.00 |
| 20.92      |     |      | H   |     |   |        |        |        |      |
| ATOM       | 96  | HB1  | ASP |     | 8 | 17.884 | -2.376 | 16.598 | 1.00 |
| 29.39      |     |      | H   |     |   |        |        |        |      |
| ATOM       | 97  | HB2  | ASP |     | 8 | 18.073 | -3.734 | 17.694 | 1.00 |
| 44.14      |     |      | H   |     |   |        |        |        |      |
| ATOM       | 98  | N    | CYS |     | 9 | 16.281 | -2.206 | 20.461 | 1.00 |
| 5.93       |     |      | N   |     |   |        |        |        |      |
| ATOM       | 99  | CA   | CYS |     | 9 | 16.121 | -2.607 | 21.853 | 1.00 |
| 7.54       |     |      | C   |     |   |        |        |        |      |
| ATOM       | 100 | C    | CYS |     | 9 | 14.707 | -3.120 | 22.086 | 1.00 |
| 14.60      |     |      | C   |     |   |        |        |        |      |
| ATOM       | 101 | O    | CYS |     | 9 | 14.496 | -4.140 | 22.744 | 1.00 |
| 25.78      |     |      | O   |     |   |        |        |        |      |
| ATOM       | 102 | CB   | CYS |     | 9 | 16.390 | -1.416 | 22.764 | 1.00 |
| 6.63       |     |      | C   |     |   |        |        |        |      |
| ATOM       | 103 | SG   | CYS |     | 9 | 18.145 | -1.032 | 22.693 | 1.00 |

|            |     |     |     |    |        |        |        |      |  |
|------------|-----|-----|-----|----|--------|--------|--------|------|--|
| 10.91      |     |     | S   |    |        |        |        |      |  |
| ATOM       | 104 | HN  | CYS | 9  | 16.480 | -1.271 | 20.248 | 1.00 |  |
| 6.51       |     |     | H   |    |        |        |        |      |  |
| ATOM       | 105 | HA  | CYS | 9  | 16.834 | -3.379 | 22.082 | 1.00 |  |
| 11.12      |     |     | H   |    |        |        |        |      |  |
| ATOM       | 106 | HB1 | CYS | 9  | 16.117 | -1.661 | 23.778 | 1.00 |  |
| 11.28      |     |     | H   |    |        |        |        |      |  |
| ATOM       | 107 | HB2 | CYS | 9  | 15.816 | -0.564 | 22.429 | 1.00 |  |
| 5.04       |     |     | H   |    |        |        |        |      |  |
| ATOM       | 108 | N   | ALA | 10 | 13.746 | -2.399 | 21.522 | 1.00 |  |
| 16.26      |     |     | N   |    |        |        |        |      |  |
| ATOM       | 109 | CA  | ALA | 10 | 12.338 | -2.756 | 21.637 | 1.00 |  |
| 32.04      |     |     | C   |    |        |        |        |      |  |
| ATOM       | 110 | C   | ALA | 10 | 11.503 | -1.811 | 20.778 | 1.00 |  |
| 45.47      |     |     | C   |    |        |        |        |      |  |
| ATOM       | 111 | O   | ALA | 10 | 11.973 | -0.739 | 20.392 |      |  |
| 1.00119.04 |     |     | O   |    |        |        |        |      |  |
| ATOM       | 112 | CB  | ALA | 10 | 11.883 | -2.677 | 23.098 | 1.00 |  |
| 30.10      |     |     | C   |    |        |        |        |      |  |
| ATOM       | 113 | HN  | ALA | 10 | 13.994 | -1.604 | 21.007 | 1.00 |  |
| 12.81      |     |     | H   |    |        |        |        |      |  |
| ATOM       | 114 | HA  | ALA | 10 | 12.202 | -3.766 | 21.280 | 1.00 |  |
| 47.14      |     |     | H   |    |        |        |        |      |  |
| ATOM       | 115 | HB1 | ALA | 10 | 10.994 | -3.276 | 23.231 | 1.00 |  |
| 84.37      |     |     | H   |    |        |        |        |      |  |
| ATOM       | 116 | HB2 | ALA | 10 | 11.667 | -1.652 | 23.356 |      |  |
| 1.00118.20 |     |     | H   |    |        |        |        |      |  |
| ATOM       | 117 | HB3 | ALA | 10 | 12.667 | -3.052 | 23.740 |      |  |
| 1.00117.32 |     |     | H   |    |        |        |        |      |  |
| ATOM       | 118 | N   | ALA | 11 | 10.270 | -2.201 | 20.478 | 1.00 |  |
| 30.62      |     |     | N   |    |        |        |        |      |  |
| ATOM       | 119 | CA  | ALA | 11 | 9.405  | -1.358 | 19.661 | 1.00 |  |
| 35.24      |     |     | C   |    |        |        |        |      |  |
| ATOM       | 120 | C   | ALA | 11 | 9.173  | -0.011 | 20.340 | 1.00 |  |
| 22.78      |     |     | C   |    |        |        |        |      |  |
| ATOM       | 121 | O   | ALA | 11 | 9.260  | 1.040  | 19.704 | 1.00 |  |
| 53.33      |     |     | O   |    |        |        |        |      |  |
| ATOM       | 122 | CB  | ALA | 11 | 8.061  | -2.053 | 19.431 | 1.00 |  |
| 60.49      |     |     | C   |    |        |        |        |      |  |
| ATOM       | 123 | HN  | ALA | 11 | 9.938  | -3.063 | 20.808 | 1.00 |  |
| 50.37      |     |     | H   |    |        |        |        |      |  |
| ATOM       | 124 | HA  | ALA | 11 | 9.879  | -1.191 | 18.705 | 1.00 |  |
| 41.70      |     |     | H   |    |        |        |        |      |  |
| ATOM       | 125 | HB1 | ALA | 11 | 8.232  | -3.090 | 19.178 |      |  |
| 1.00157.06 |     |     | H   |    |        |        |        |      |  |
| ATOM       | 126 | HB2 | ALA | 11 | 7.537  | -1.566 | 18.624 |      |  |
| 1.00148.83 |     |     | H   |    |        |        |        |      |  |
| ATOM       | 127 | HB3 | ALA | 11 | 7.468  | -1.996 | 20.332 |      |  |
| 1.00137.06 |     |     | H   |    |        |        |        |      |  |
| ATOM       | 128 | N   | ASP | 12 | 8.883  | -0.050 | 21.637 | 1.00 |  |
| 18.98      |     |     | N   |    |        |        |        |      |  |
| ATOM       | 129 | CA  | ASP | 12 | 8.645  | 1.173  | 22.397 | 1.00 |  |

|            |     |     |     |     |        |        |        |      |  |
|------------|-----|-----|-----|-----|--------|--------|--------|------|--|
| 31.05      |     |     | C   |     |        |        |        |      |  |
| ATOM       | 130 | C   | ASP | 12  | 9.948  | 1.940  | 22.621 | 1.00 |  |
| 22.98      |     |     | C   |     |        |        |        |      |  |
| ATOM       | 131 | O   | ASP | 12  | 9.970  | 3.170  | 22.580 | 1.00 |  |
| 37.14      |     |     | O   |     |        |        |        |      |  |
| ATOM       | 132 | CB  | ASP | 12  | 8.015  | 0.832  | 23.748 | 1.00 |  |
| 48.35      |     |     | C   |     |        |        |        |      |  |
| ATOM       | 133 | CG  | ASP | 12  | 6.581  | 0.355  | 23.548 |      |  |
| 1.00104.83 |     |     |     | C   |        |        |        |      |  |
| ATOM       | 134 | OD1 | ASP | 12  | 6.059  | 0.546  | 22.461 |      |  |
| 1.00258.73 |     |     |     | O   |        |        |        |      |  |
| ATOM       | 135 | OD2 | ASP | 12  | 6.023  | -0.194 | 24.484 |      |  |
| 1.00213.46 |     |     |     | O1- |        |        |        |      |  |
| ATOM       | 136 | HN  | ASP | 12  | 8.831  | -0.917 | 22.091 | 1.00 |  |
| 36.19      |     |     | H   |     |        |        |        |      |  |
| ATOM       | 137 | HA  | ASP | 12  | 7.962  | 1.800  | 21.845 | 1.00 |  |
| 49.76      |     |     | H   |     |        |        |        |      |  |
| ATOM       | 138 | HB1 | ASP | 12  | 8.014  | 1.712  | 24.375 | 1.00 |  |
| 95.71      |     |     | H   |     |        |        |        |      |  |
| ATOM       | 139 | HB2 | ASP | 12  | 8.589  | 0.051  | 24.226 | 1.00 |  |
| 54.37      |     |     | H   |     |        |        |        |      |  |
| ATOM       | 140 | N   | GLU | 13  | 11.026 | 1.203  | 22.869 | 1.00 |  |
| 17.60      |     |     | N   |     |        |        |        |      |  |
| ATOM       | 141 | CA  | GLU | 13  | 12.329 | 1.816  | 23.114 | 1.00 |  |
| 12.01      |     |     | C   |     |        |        |        |      |  |
| ATOM       | 142 | C   | GLU | 13  | 12.924 | 2.393  | 21.832 | 1.00 |  |
| 10.07      |     |     | C   |     |        |        |        |      |  |
| ATOM       | 143 | O   | GLU | 13  | 12.561 | 1.988  | 20.727 | 1.00 |  |
| 12.81      |     |     | O   |     |        |        |        |      |  |
| ATOM       | 144 | CB  | GLU | 13  | 13.287 | 0.780  | 23.700 | 1.00 |  |
| 11.74      |     |     | C   |     |        |        |        |      |  |
| ATOM       | 145 | CG  | GLU | 13  | 12.762 | 0.311  | 25.059 | 1.00 |  |
| 13.49      |     |     | C   |     |        |        |        |      |  |
| ATOM       | 146 | CD  | GLU | 13  | 12.891 | 1.433  | 26.082 |      |  |
| 1.00142.36 |     |     |     | C   |        |        |        |      |  |
| ATOM       | 147 | OE1 | GLU | 13  | 12.267 | 1.331  | 27.125 |      |  |
| 1.00339.06 |     |     |     | O   |        |        |        |      |  |
| ATOM       | 148 | OE2 | GLU | 13  | 13.611 | 2.378  | 25.808 |      |  |
| 1.00335.28 |     |     |     | O1- |        |        |        |      |  |
| ATOM       | 149 | HN  | GLU | 13  | 10.943 | 0.226  | 22.898 | 1.00 |  |
| 28.36      |     |     | H   |     |        |        |        |      |  |
| ATOM       | 150 | HA  | GLU | 13  | 12.206 | 2.614  | 23.831 | 1.00 |  |
| 13.06      |     |     | H   |     |        |        |        |      |  |
| ATOM       | 151 | HB1 | GLU | 13  | 14.261 | 1.223  | 23.825 | 1.00 |  |
| 13.76      |     |     | H   |     |        |        |        |      |  |
| ATOM       | 152 | HB2 | GLU | 13  | 13.358 | -0.064 | 23.029 | 1.00 |  |
| 9.94       |     |     | H   |     |        |        |        |      |  |
| ATOM       | 153 | HG1 | GLU | 13  | 13.334 | -0.542 | 25.390 | 1.00 |  |
| 66.02      |     |     | H   |     |        |        |        |      |  |
| ATOM       | 154 | HG2 | GLU | 13  | 11.722 | 0.032  | 24.966 | 1.00 |  |
| 56.23      |     |     | H   |     |        |        |        |      |  |
| ATOM       | 155 | N   | CYS | 14  | 13.847 | 3.345  | 21.992 | 1.00 |  |

|       |     |     |     |    |        |       |        |      |
|-------|-----|-----|-----|----|--------|-------|--------|------|
| 9.12  |     |     | N   |    |        |       |        |      |
| ATOM  | 156 | CA  | CYS | 14 | 14.507 | 3.988 | 20.852 | 1.00 |
| 10.69 |     |     | C   |    |        |       |        |      |
| ATOM  | 157 | C   | CYS | 14 | 15.927 | 3.452 | 20.690 | 1.00 |
| 9.56  |     |     | C   |    |        |       |        |      |
| ATOM  | 158 | O   | CYS | 14 | 16.525 | 2.958 | 21.644 | 1.00 |
| 13.62 |     |     | O   |    |        |       |        |      |
| ATOM  | 159 | CB  | CYS | 14 | 14.560 | 5.501 | 21.065 | 1.00 |
| 13.96 |     |     | C   |    |        |       |        |      |
| ATOM  | 160 | SG  | CYS | 14 | 15.483 | 6.267 | 19.707 | 1.00 |
| 42.96 |     |     | S   |    |        |       |        |      |
| ATOM  | 161 | HN  | CYS | 14 | 14.094 | 3.620 | 22.902 | 1.00 |
| 9.76  |     |     | H   |    |        |       |        |      |
| ATOM  | 162 | HA  | CYS | 14 | 13.949 | 3.783 | 19.949 | 1.00 |
| 15.54 |     |     | H   |    |        |       |        |      |
| ATOM  | 163 | HB1 | CYS | 14 | 15.051 | 5.716 | 22.002 | 1.00 |
| 50.72 |     |     | H   |    |        |       |        |      |
| ATOM  | 164 | HB2 | CYS | 14 | 13.555 | 5.897 | 21.086 | 1.00 |
| 46.13 |     |     | H   |    |        |       |        |      |
| ATOM  | 165 | N   | CYS | 15 | 16.460 | 3.556 | 19.474 | 1.00 |
| 9.60  |     |     | N   |    |        |       |        |      |
| ATOM  | 166 | CA  | CYS | 15 | 17.813 | 3.081 | 19.189 | 1.00 |
| 9.28  |     |     | C   |    |        |       |        |      |
| ATOM  | 167 | C   | CYS | 15 | 18.455 | 3.951 | 18.118 | 1.00 |
| 9.92  |     |     | C   |    |        |       |        |      |
| ATOM  | 168 | O   | CYS | 15 | 17.870 | 4.176 | 17.059 | 1.00 |
| 13.31 |     |     | O   |    |        |       |        |      |
| ATOM  | 169 | CB  | CYS | 15 | 17.765 | 1.631 | 18.706 | 1.00 |
| 12.90 |     |     | C   |    |        |       |        |      |
| ATOM  | 170 | SG  | CYS | 15 | 19.446 | 1.048 | 18.370 | 1.00 |
| 39.11 |     |     | S   |    |        |       |        |      |
| ATOM  | 171 | HN  | CYS | 15 | 15.936 | 3.963 | 18.752 | 1.00 |
| 13.12 |     |     | H   |    |        |       |        |      |
| ATOM  | 172 | HA  | CYS | 15 | 18.410 | 3.133 | 20.088 | 1.00 |
| 8.26  |     |     | H   |    |        |       |        |      |
| ATOM  | 173 | HB1 | CYS | 15 | 17.176 | 1.571 | 17.802 | 1.00 |
| 24.82 |     |     | H   |    |        |       |        |      |
| ATOM  | 174 | HB2 | CYS | 15 | 17.317 | 1.012 | 19.469 | 1.00 |
| 27.31 |     |     | H   |    |        |       |        |      |
| ATOM  | 175 | N   | VAL | 16 | 19.663 | 4.440 | 18.391 | 1.00 |
| 9.56  |     |     | N   |    |        |       |        |      |
| ATOM  | 176 | CA  | VAL | 16 | 20.364 | 5.283 | 17.432 | 1.00 |
| 11.99 |     |     | C   |    |        |       |        |      |
| ATOM  | 177 | C   | VAL | 16 | 21.868 | 5.171 | 17.633 | 1.00 |
| 7.73  |     |     | C   |    |        |       |        |      |
| ATOM  | 178 | O   | VAL | 16 | 22.358 | 5.214 | 18.761 | 1.00 |
| 8.83  |     |     | O   |    |        |       |        |      |
| ATOM  | 179 | CB  | VAL | 16 | 19.913 | 6.736 | 17.597 | 1.00 |
| 18.37 |     |     | C   |    |        |       |        |      |
| ATOM  | 180 | CG1 | VAL | 16 | 20.302 | 7.244 | 18.986 | 1.00 |
| 39.61 |     |     | C   |    |        |       |        |      |
| ATOM  | 181 | CG2 | VAL | 16 | 20.580 | 7.599 | 16.528 |      |

|            |     |      |     |     |    |        |       |        |      |
|------------|-----|------|-----|-----|----|--------|-------|--------|------|
| 1.00115.21 |     |      |     | C   |    |        |       |        |      |
| ATOM       | 182 | HN   | VAL |     | 16 | 20.092 | 4.230 | 19.253 | 1.00 |
| 9.76       |     |      | H   |     |    |        |       |        |      |
| ATOM       | 183 | HA   | VAL |     | 16 | 20.123 | 4.957 | 16.430 | 1.00 |
| 17.27      |     |      | H   |     |    |        |       |        |      |
| ATOM       | 184 | HB   | VAL |     | 16 | 18.840 | 6.791 | 17.486 | 1.00 |
| 52.63      |     |      | H   |     |    |        |       |        |      |
| ATOM       | 185 | HG11 | VAL |     | 16 | 19.949 | 6.551 | 19.734 |      |
| 1.00128.07 |     |      |     | H   |    |        |       |        |      |
| ATOM       | 186 | HG12 | VAL |     | 16 | 19.854 | 8.212 | 19.153 |      |
| 1.00154.13 |     |      |     | H   |    |        |       |        |      |
| ATOM       | 187 | HG13 | VAL |     | 16 | 21.377 | 7.330 | 19.051 |      |
| 1.00135.74 |     |      |     | H   |    |        |       |        |      |
| ATOM       | 188 | HG21 | VAL |     | 16 | 20.350 | 7.201 | 15.552 |      |
| 1.00229.05 |     |      |     | H   |    |        |       |        |      |
| ATOM       | 189 | HG22 | VAL |     | 16 | 21.650 | 7.594 | 16.678 |      |
| 1.00261.82 |     |      |     | H   |    |        |       |        |      |
| ATOM       | 190 | HG23 | VAL |     | 16 | 20.210 | 8.610 | 16.602 |      |
| 1.00210.07 |     |      |     | H   |    |        |       |        |      |
| ATOM       | 191 | N    | ASP |     | 17 | 22.598 | 5.012 | 16.531 | 1.00 |
| 14.34      |     |      | N   |     |    |        |       |        |      |
| ATOM       | 192 | CA   | ASP |     | 17 | 24.053 | 4.879 | 16.593 | 1.00 |
| 11.90      |     |      | C   |     |    |        |       |        |      |
| ATOM       | 193 | C    | ASP |     | 17 | 24.737 | 6.192 | 16.233 | 1.00 |
| 13.15      |     |      | C   |     |    |        |       |        |      |
| ATOM       | 194 | O    | ASP |     | 17 | 24.582 | 6.703 | 15.123 | 1.00 |
| 25.96      |     |      | O   |     |    |        |       |        |      |
| ATOM       | 195 | CB   | ASP |     | 17 | 24.513 | 3.786 | 15.625 | 1.00 |
| 20.80      |     |      | C   |     |    |        |       |        |      |
| ATOM       | 196 | CG   | ASP |     | 17 | 24.098 | 2.416 | 16.150 | 1.00 |
| 28.72      |     |      | C   |     |    |        |       |        |      |
| ATOM       | 197 | OD1  | ASP |     | 17 | 23.725 | 2.334 | 17.309 |      |
| 1.00135.42 |     |      |     | O   |    |        |       |        |      |
| ATOM       | 198 | OD2  | ASP |     | 17 | 24.159 | 1.468 | 15.385 |      |
| 1.00114.17 |     |      |     | O1- |    |        |       |        |      |
| ATOM       | 199 | HN   | ASP |     | 17 | 22.151 | 4.974 | 15.661 | 1.00 |
| 28.29      |     |      | H   |     |    |        |       |        |      |
| ATOM       | 200 | HA   | ASP |     | 17 | 24.347 | 4.596 | 17.594 | 1.00 |
| 10.49      |     |      | H   |     |    |        |       |        |      |
| ATOM       | 201 | HB1  | ASP |     | 17 | 25.588 | 3.821 | 15.531 | 1.00 |
| 22.42      |     |      | H   |     |    |        |       |        |      |
| ATOM       | 202 | HB2  | ASP |     | 17 | 24.063 | 3.951 | 14.659 | 1.00 |
| 29.52      |     |      | H   |     |    |        |       |        |      |
| ATOM       | 203 | N    | THR |     | 18 | 25.508 | 6.725 | 17.179 | 1.00 |
| 11.55      |     |      | N   |     |    |        |       |        |      |
| ATOM       | 204 | CA   | THR |     | 18 | 26.238 | 7.974 | 16.965 | 1.00 |
| 17.10      |     |      | C   |     |    |        |       |        |      |
| ATOM       | 205 | C    | THR |     | 18 | 27.694 | 7.677 | 16.640 | 1.00 |
| 10.63      |     |      | C   |     |    |        |       |        |      |
| ATOM       | 206 | O    | THR |     | 18 | 28.175 | 6.569 | 16.872 | 1.00 |
| 6.49       |     |      | O   |     |    |        |       |        |      |
| ATOM       | 207 | CB   | THR |     | 18 | 26.165 | 8.848 | 18.220 | 1.00 |



|            |     |      |     |    |        |        |        |      |
|------------|-----|------|-----|----|--------|--------|--------|------|
| 28.52      |     |      | C   |    |        |        |        |      |
| ATOM       | 208 | CG2  | THR | 18 | 24.777 | 9.475  | 18.339 | 1.00 |
| 45.38      |     |      | C   |    |        |        |        |      |
| ATOM       | 209 | OG1  | THR | 18 | 26.426 | 8.050  | 19.362 | 1.00 |
| 26.49      |     |      | O   |    |        |        |        |      |
| ATOM       | 210 | HN   | THR | 18 | 25.598 | 6.262  | 18.038 | 1.00 |
| 13.96      |     |      | H   |    |        |        |        |      |
| ATOM       | 211 | HA   | THR | 18 | 25.796 | 8.515  | 16.138 | 1.00 |
| 26.43      |     |      | H   |    |        |        |        |      |
| ATOM       | 212 | HB   | THR | 18 | 26.902 | 9.633  | 18.156 | 1.00 |
| 37.43      |     |      | H   |    |        |        |        |      |
| ATOM       | 213 | HG1  | THR | 18 | 25.614 | 7.599  | 19.602 | 1.00 |
| 71.62      |     |      | H   |    |        |        |        |      |
| ATOM       | 214 | HG21 | THR | 18 | 24.692 | 10.287 | 17.632 |      |
| 1.00100.44 |     |      |     | H  |        |        |        |      |
| ATOM       | 215 | HG22 | THR | 18 | 24.640 | 9.854  | 19.341 |      |
| 1.00129.42 |     |      |     | H  |        |        |        |      |
| ATOM       | 216 | HG23 | THR | 18 | 24.024 | 8.730  | 18.128 |      |
| 1.00156.21 |     |      |     | H  |        |        |        |      |
| ATOM       | 217 | N    | VAL | 19 | 28.388 | 8.681  | 16.116 | 1.00 |
| 16.32      |     |      | N   |    |        |        |        |      |
| ATOM       | 218 | CA   | VAL | 19 | 29.783 | 8.555  | 15.766 | 1.00 |
| 13.34      |     |      | C   |    |        |        |        |      |
| ATOM       | 219 | C    | VAL | 19 | 30.248 | 9.848  | 15.132 | 1.00 |
| 25.88      |     |      | C   |    |        |        |        |      |
| ATOM       | 220 | O    | VAL | 19 | 29.731 | 10.299 | 14.111 | 1.00 |
| 42.11      |     |      | O   |    |        |        |        |      |
| ATOM       | 221 | CB   | VAL | 19 | 30.028 | 7.380  | 14.820 | 1.00 |
| 15.48      |     |      | C   |    |        |        |        |      |
| ATOM       | 222 | CG1  | VAL | 19 | 29.029 | 7.421  | 13.660 | 1.00 |
| 29.06      |     |      | C   |    |        |        |        |      |
| ATOM       | 223 | CG2  | VAL | 19 | 31.459 | 7.469  | 14.270 | 1.00 |
| 20.67      |     |      | C   |    |        |        |        |      |
| ATOM       | 224 | HN   | VAL | 19 | 27.955 | 9.542  | 15.974 | 1.00 |
| 26.89      |     |      | H   |    |        |        |        |      |
| ATOM       | 225 | HA   | VAL | 19 | 30.352 | 8.393  | 16.671 | 1.00 |
| 8.08       |     |      | H   |    |        |        |        |      |
| ATOM       | 226 | HB   | VAL | 19 | 29.911 | 6.458  | 15.367 | 1.00 |
| 11.49      |     |      | H   |    |        |        |        |      |
| ATOM       | 227 | HG11 | VAL | 19 | 29.113 | 6.514  | 13.082 |      |
| 1.00137.43 |     |      |     | H  |        |        |        |      |
| ATOM       | 228 | HG12 | VAL | 19 | 29.242 | 8.271  | 13.029 | 1.00 |
| 93.29      |     |      | H   |    |        |        |        |      |
| ATOM       | 229 | HG13 | VAL | 19 | 28.026 | 7.506  | 14.051 |      |
| 1.00108.69 |     |      |     | H  |        |        |        |      |
| ATOM       | 230 | HG21 | VAL | 19 | 31.743 | 6.518  | 13.842 | 1.00 |
| 99.42      |     |      | H   |    |        |        |        |      |
| ATOM       | 231 | HG22 | VAL | 19 | 32.139 | 7.723  | 15.072 |      |
| 1.00111.36 |     |      |     | H  |        |        |        |      |
| ATOM       | 232 | HG23 | VAL | 19 | 31.503 | 8.236  | 13.510 | 1.00 |
| 77.11      |     |      | H   |    |        |        |        |      |
| ATOM       | 233 | N    | PHE | 20 | 31.211 | 10.438 | 15.787 | 1.00 |

|            |     |     |     |    |        |        |        |      |
|------------|-----|-----|-----|----|--------|--------|--------|------|
| 24.58      |     |     | N   |    |        |        |        |      |
| ATOM       | 234 | CA  | PHE | 20 | 31.786 | 11.705 | 15.376 | 1.00 |
| 40.34      |     |     | C   |    |        |        |        |      |
| ATOM       | 235 | C   | PHE | 20 | 33.030 | 11.501 | 14.516 | 1.00 |
| 40.37      |     |     | C   |    |        |        |        |      |
| ATOM       | 236 | O   | PHE | 20 | 32.946 | 11.338 | 13.299 | 1.00 |
| 66.02      |     |     | O   |    |        |        |        |      |
| ATOM       | 237 | CB  | PHE | 20 | 32.142 | 12.523 | 16.639 | 1.00 |
| 48.79      |     |     | C   |    |        |        |        |      |
| ATOM       | 238 | CG  | PHE | 20 | 32.447 | 11.602 | 17.813 | 1.00 |
| 35.75      |     |     | C   |    |        |        |        |      |
| ATOM       | 239 | CD1 | PHE | 20 | 31.429 | 10.824 | 18.398 | 1.00 |
| 30.20      |     |     | C   |    |        |        |        |      |
| ATOM       | 240 | CD2 | PHE | 20 | 33.747 | 11.542 | 18.333 | 1.00 |
| 40.95      |     |     | C   |    |        |        |        |      |
| ATOM       | 241 | CE1 | PHE | 20 | 31.719 | 9.994  | 19.485 | 1.00 |
| 30.41      |     |     | C   |    |        |        |        |      |
| ATOM       | 242 | CE2 | PHE | 20 | 34.034 | 10.710 | 19.420 | 1.00 |
| 45.84      |     |     | C   |    |        |        |        |      |
| ATOM       | 243 | CZ  | PHE | 20 | 33.020 | 9.934  | 19.996 | 1.00 |
| 40.81      |     |     | C   |    |        |        |        |      |
| ATOM       | 244 | HN  | PHE | 20 | 31.530 | 10.013 | 16.598 | 1.00 |
| 16.73      |     |     | H   |    |        |        |        |      |
| ATOM       | 245 | HA  | PHE | 20 | 31.057 | 12.259 | 14.799 | 1.00 |
| 59.91      |     |     | H   |    |        |        |        |      |
| ATOM       | 246 | HB1 | PHE | 20 | 31.313 | 13.138 | 16.895 | 1.00 |
| 67.15      |     |     | H   |    |        |        |        |      |
| ATOM       | 247 | HB2 | PHE | 20 | 32.995 | 13.158 | 16.446 | 1.00 |
| 58.17      |     |     | H   |    |        |        |        |      |
| ATOM       | 248 | HD1 | PHE | 20 | 30.420 | 10.855 | 18.006 | 1.00 |
| 33.34      |     |     | H   |    |        |        |        |      |
| ATOM       | 249 | HD2 | PHE | 20 | 34.528 | 12.139 | 17.895 | 1.00 |
| 49.35      |     |     | H   |    |        |        |        |      |
| ATOM       | 250 | HE1 | PHE | 20 | 30.937 | 9.400  | 19.931 | 1.00 |
| 30.61      |     |     | H   |    |        |        |        |      |
| ATOM       | 251 | HE2 | PHE | 20 | 35.037 | 10.662 | 19.815 | 1.00 |
| 61.27      |     |     | H   |    |        |        |        |      |
| ATOM       | 252 | HZ  | PHE | 20 | 33.242 | 9.293  | 20.834 | 1.00 |
| 52.66      |     |     | H   |    |        |        |        |      |
| ATOM       | 253 | N   | GLU | 21 | 34.174 | 11.541 | 15.170 | 1.00 |
| 41.31      |     |     | N   |    |        |        |        |      |
| ATOM       | 254 | CA  | GLU | 21 | 35.455 | 11.396 | 14.499 | 1.00 |
| 56.16      |     |     | C   |    |        |        |        |      |
| ATOM       | 255 | C   | GLU | 21 | 35.773 | 9.919  | 14.251 | 1.00 |
| 58.61      |     |     | C   |    |        |        |        |      |
| ATOM       | 256 | O   | GLU | 21 | 36.571 | 9.588  | 13.374 |      |
| 1.00201.19 |     |     | O   |    |        |        |        |      |
| ATOM       | 257 | CB  | GLU | 21 | 36.520 | 12.075 | 15.374 | 1.00 |
| 57.37      |     |     | C   |    |        |        |        |      |
| ATOM       | 258 | CG  | GLU | 21 | 37.927 | 11.537 | 15.074 |      |
| 1.00193.56 |     |     | C   |    |        |        |        |      |
| ATOM       | 259 | CD  | GLU | 21 | 38.208 | 11.614 | 13.577 |      |

|            |     |     |     |     |    |        |        |        |      |
|------------|-----|-----|-----|-----|----|--------|--------|--------|------|
| 1.00304.62 |     |     |     | C   |    |        |        |        |      |
| ATOM       | 260 | OE1 | GLU |     | 21 | 38.703 | 10.639 | 13.035 |      |
| 1.00451.81 |     |     |     | O   |    |        |        |        |      |
| ATOM       | 261 | OE2 | GLU |     | 21 | 37.922 | 12.647 | 12.993 |      |
| 1.00442.88 |     |     |     | O1- |    |        |        |        |      |
| ATOM       | 262 | HN  | GLU |     | 21 | 34.157 | 11.693 | 16.139 | 1.00 |
| 50.82      |     |     | H   |     |    |        |        |        |      |
| ATOM       | 263 | HA  | GLU |     | 21 | 35.410 | 11.905 | 13.547 | 1.00 |
| 85.72      |     |     | H   |     |    |        |        |        |      |
| ATOM       | 264 | HB1 | GLU |     | 21 | 36.276 | 11.903 | 16.412 | 1.00 |
| 46.37      |     |     | H   |     |    |        |        |        |      |
| ATOM       | 265 | HB2 | GLU |     | 21 | 36.506 | 13.141 | 15.184 |      |
| 1.00131.81 |     |     |     | H   |    |        |        |        |      |
| ATOM       | 266 | HG1 | GLU |     | 21 | 38.000 | 10.511 | 15.401 |      |
| 1.00314.91 |     |     |     | H   |    |        |        |        |      |
| ATOM       | 267 | HG2 | GLU |     | 21 | 38.657 | 12.132 | 15.604 |      |
| 1.00266.92 |     |     |     | H   |    |        |        |        |      |
| ATOM       | 268 | N   | GLY |     | 22 | 35.143 | 9.036  | 15.019 | 1.00 |
| 86.70      |     |     | N   |     |    |        |        |        |      |
| ATOM       | 269 | CA  | GLY |     | 22 | 35.365 | 7.597  | 14.864 |      |
| 1.00104.66 |     |     |     | C   |    |        |        |        |      |
| ATOM       | 270 | C   | GLY |     | 22 | 36.418 | 7.089  | 15.846 | 1.00 |
| 71.50      |     |     | C   |     |    |        |        |        |      |
| ATOM       | 271 | O   | GLY |     | 22 | 36.686 | 5.889  | 15.907 | 1.00 |
| 89.87      |     |     | O   |     |    |        |        |        |      |
| ATOM       | 272 | HN  | GLY |     | 22 | 34.512 | 9.353  | 15.700 |      |
| 1.00214.64 |     |     |     | H   |    |        |        |        |      |
| ATOM       | 273 | HA1 | GLY |     | 22 | 35.695 | 7.389  | 13.856 |      |
| 1.00152.47 |     |     |     | H   |    |        |        |        |      |
| ATOM       | 274 | HA2 | GLY |     | 22 | 34.436 | 7.078  | 15.045 |      |
| 1.00118.15 |     |     |     | H   |    |        |        |        |      |
| ATOM       | 275 | N   | ASP |     | 23 | 37.002 | 7.997  | 16.621 | 1.00 |
| 44.68      |     |     | N   |     |    |        |        |        |      |
| ATOM       | 276 | CA  | ASP |     | 23 | 38.010 | 7.599  | 17.599 | 1.00 |
| 43.33      |     |     | C   |     |    |        |        |        |      |
| ATOM       | 277 | C   | ASP |     | 23 | 37.393 | 6.613  | 18.581 | 1.00 |
| 37.55      |     |     | C   |     |    |        |        |        |      |
| ATOM       | 278 | O   | ASP |     | 23 | 38.016 | 5.626  | 18.972 | 1.00 |
| 61.37      |     |     | O   |     |    |        |        |        |      |
| ATOM       | 279 | CB  | ASP |     | 23 | 38.529 | 8.826  | 18.353 | 1.00 |
| 40.74      |     |     | C   |     |    |        |        |        |      |
| ATOM       | 280 | CG  | ASP |     | 23 | 39.402 | 9.672  | 17.434 |      |
| 1.00141.86 |     |     |     | C   |    |        |        |        |      |
| ATOM       | 281 | OD1 | ASP |     | 23 | 39.763 | 9.184  | 16.377 |      |
| 1.00328.18 |     |     |     | O   |    |        |        |        |      |
| ATOM       | 282 | OD2 | ASP |     | 23 | 39.697 | 10.799 | 17.802 |      |
| 1.00304.58 |     |     |     | O1- |    |        |        |        |      |
| ATOM       | 283 | HN  | ASP |     | 23 | 36.750 | 8.940  | 16.541 | 1.00 |
| 40.86      |     |     | H   |     |    |        |        |        |      |
| ATOM       | 284 | HA  | ASP |     | 23 | 38.832 | 7.124  | 17.087 | 1.00 |
| 72.12      |     |     | H   |     |    |        |        |        |      |
| ATOM       | 285 | HB1 | ASP |     | 23 | 39.111 | 8.504  | 19.204 | 1.00 |

|            |     |     |     |    |        |       |        |      |
|------------|-----|-----|-----|----|--------|-------|--------|------|
| 94.15      |     |     | H   |    |        |       |        |      |
| ATOM       | 286 | HB2 | ASP | 23 | 37.690 | 9.415 | 18.695 | 1.00 |
| 93.26      |     |     | H   |    |        |       |        |      |
| ATOM       | 287 | N   | MET | 24 | 36.148 | 6.885 | 18.951 | 1.00 |
| 23.24      |     |     | N   |    |        |       |        |      |
| ATOM       | 288 | CA  | MET | 24 | 35.404 | 6.026 | 19.864 | 1.00 |
| 32.50      |     |     | C   |    |        |       |        |      |
| ATOM       | 289 | C   | MET | 24 | 33.924 | 6.100 | 19.514 | 1.00 |
| 25.13      |     |     | C   |    |        |       |        |      |
| ATOM       | 290 | O   | MET | 24 | 33.263 | 7.102 | 19.784 | 1.00 |
| 54.40      |     |     | O   |    |        |       |        |      |
| ATOM       | 291 | CB  | MET | 24 | 35.620 | 6.475 | 21.313 | 1.00 |
| 47.36      |     |     | C   |    |        |       |        |      |
| ATOM       | 292 | CG  | MET | 24 | 34.875 | 5.534 | 22.268 |      |
| 1.00151.73 |     |     |     | C  |        |       |        |      |
| ATOM       | 293 | SD  | MET | 24 | 33.133 | 6.024 | 22.370 |      |
| 1.00209.23 |     |     |     | S  |        |       |        |      |
| ATOM       | 294 | CE  | MET | 24 | 33.328 | 7.489 | 23.425 |      |
| 1.00243.29 |     |     |     | C  |        |       |        |      |
| ATOM       | 295 | HN  | MET | 24 | 35.708 | 7.680 | 18.582 | 1.00 |
| 17.32      |     |     | H   |    |        |       |        |      |
| ATOM       | 296 | HA  | MET | 24 | 35.743 | 5.005 | 19.754 | 1.00 |
| 48.94      |     |     | H   |    |        |       |        |      |
| ATOM       | 297 | HB1 | MET | 24 | 35.245 | 7.481 | 21.434 |      |
| 1.00124.40 |     |     |     | H  |        |       |        |      |
| ATOM       | 298 | HB2 | MET | 24 | 36.677 | 6.457 | 21.540 |      |
| 1.00166.96 |     |     |     | H  |        |       |        |      |
| ATOM       | 299 | HG1 | MET | 24 | 35.322 | 5.593 | 23.250 |      |
| 1.00331.71 |     |     |     | H  |        |       |        |      |
| ATOM       | 300 | HG2 | MET | 24 | 34.941 | 4.519 | 21.906 |      |
| 1.00302.30 |     |     |     | H  |        |       |        |      |
| ATOM       | 301 | HE1 | MET | 24 | 32.872 | 8.340 | 22.941 |      |
| 1.00340.44 |     |     |     | H  |        |       |        |      |
| ATOM       | 302 | HE2 | MET | 24 | 34.374 | 7.693 | 23.589 |      |
| 1.00373.88 |     |     |     | H  |        |       |        |      |
| ATOM       | 303 | HE3 | MET | 24 | 32.846 | 7.311 | 24.376 |      |
| 1.00386.81 |     |     |     | H  |        |       |        |      |
| ATOM       | 304 | N   | VAL | 25 | 33.411 | 5.044 | 18.889 | 1.00 |
| 22.44      |     |     | N   |    |        |       |        |      |
| ATOM       | 305 | CA  | VAL | 25 | 32.011 | 5.027 | 18.487 | 1.00 |
| 15.37      |     |     | C   |    |        |       |        |      |
| ATOM       | 306 | C   | VAL | 25 | 31.088 | 5.081 | 19.694 | 1.00 |
| 17.47      |     |     | C   |    |        |       |        |      |
| ATOM       | 307 | O   | VAL | 25 | 31.395 | 4.542 | 20.759 | 1.00 |
| 29.52      |     |     | O   |    |        |       |        |      |
| ATOM       | 308 | CB  | VAL | 25 | 31.696 | 3.782 | 17.660 | 1.00 |
| 23.36      |     |     | C   |    |        |       |        |      |
| ATOM       | 309 | CG1 | VAL | 25 | 30.210 | 3.800 | 17.279 | 1.00 |
| 58.39      |     |     | C   |    |        |       |        |      |
| ATOM       | 310 | CG2 | VAL | 25 | 32.553 | 3.784 | 16.392 | 1.00 |
| 55.25      |     |     | C   |    |        |       |        |      |
| ATOM       | 311 | HN  | VAL | 25 | 33.985 | 4.278 | 18.680 | 1.00 |

|            |     |      |     |    |        |       |        |      |   |
|------------|-----|------|-----|----|--------|-------|--------|------|---|
| 48.11      |     |      | H   |    |        |       |        |      |   |
| ATOM       | 312 | HA   | VAL | 25 | 31.823 | 5.896 | 17.875 | 1.00 |   |
| 9.25       |     |      | H   |    |        |       |        |      |   |
| ATOM       | 313 | HB   | VAL | 25 | 31.908 | 2.896 | 18.244 | 1.00 |   |
| 52.45      |     |      | H   |    |        |       |        |      |   |
| ATOM       | 314 | HG11 | VAL | 25 | 29.921 | 4.805 | 16.995 |      |   |
| 1.00171.07 |     |      |     |    |        |       |        |      | H |
| ATOM       | 315 | HG12 | VAL | 25 | 29.620 | 3.485 | 18.125 |      |   |
| 1.00166.22 |     |      |     |    |        |       |        |      | H |
| ATOM       | 316 | HG13 | VAL | 25 | 30.040 | 3.130 | 16.451 |      |   |
| 1.00134.76 |     |      |     |    |        |       |        |      | H |
| ATOM       | 317 | HG21 | VAL | 25 | 32.372 | 2.878 | 15.832 |      |   |
| 1.00141.88 |     |      |     |    |        |       |        |      | H |
| ATOM       | 318 | HG22 | VAL | 25 | 33.598 | 3.836 | 16.663 |      |   |
| 1.00184.50 |     |      |     |    |        |       |        |      | H |
| ATOM       | 319 | HG23 | VAL | 25 | 32.295 | 4.639 | 15.784 |      |   |
| 1.00133.90 |     |      |     |    |        |       |        |      | H |
| ATOM       | 320 | N    | THR | 26 | 29.957 | 5.755 | 19.514 | 1.00 |   |
| 13.60      |     |      | N   |    |        |       |        |      |   |
| ATOM       | 321 | CA   | THR | 26 | 28.966 | 5.920 | 20.575 | 1.00 |   |
| 21.19      |     |      | C   |    |        |       |        |      |   |
| ATOM       | 322 | C    | THR | 26 | 27.592 | 5.434 | 20.119 | 1.00 |   |
| 16.55      |     |      | C   |    |        |       |        |      |   |
| ATOM       | 323 | O    | THR | 26 | 27.150 | 5.738 | 19.010 | 1.00 |   |
| 11.43      |     |      | O   |    |        |       |        |      |   |
| ATOM       | 324 | CB   | THR | 26 | 28.893 | 7.398 | 20.947 | 1.00 |   |
| 27.07      |     |      | C   |    |        |       |        |      |   |
| ATOM       | 325 | CG2  | THR | 26 | 27.815 | 7.619 | 22.012 | 1.00 |   |
| 44.39      |     |      | C   |    |        |       |        |      |   |
| ATOM       | 326 | OG1  | THR | 26 | 30.154 | 7.811 | 21.454 | 1.00 |   |
| 34.75      |     |      | O   |    |        |       |        |      |   |
| ATOM       | 327 | HN   | THR | 26 | 29.787 | 6.167 | 18.640 | 1.00 |   |
| 10.81      |     |      | H   |    |        |       |        |      |   |
| ATOM       | 328 | HA   | THR | 26 | 29.266 | 5.356 | 21.448 | 1.00 |   |
| 33.16      |     |      | H   |    |        |       |        |      |   |
| ATOM       | 329 | HB   | THR | 26 | 28.655 | 7.973 | 20.061 | 1.00 |   |
| 20.60      |     |      | H   |    |        |       |        |      |   |
| ATOM       | 330 | HG1  | THR | 26 | 30.171 | 8.771 | 21.460 | 1.00 |   |
| 77.72      |     |      | H   |    |        |       |        |      |   |
| ATOM       | 331 | HG21 | THR | 26 | 26.839 | 7.449 | 21.583 |      |   |
| 1.00126.99 |     |      |     |    |        |       |        |      | H |
| ATOM       | 332 | HG22 | THR | 26 | 27.874 | 8.633 | 22.377 |      |   |
| 1.00108.32 |     |      |     |    |        |       |        |      | H |
| ATOM       | 333 | HG23 | THR | 26 | 27.972 | 6.933 | 22.831 |      |   |
| 1.00151.99 |     |      |     |    |        |       |        |      | H |
| ATOM       | 334 | N    | ARG | 27 | 26.918 | 4.679 | 20.988 | 1.00 |   |
| 22.38      |     |      | N   |    |        |       |        |      |   |
| ATOM       | 335 | CA   | ARG | 27 | 25.584 | 4.146 | 20.684 | 1.00 |   |
| 20.21      |     |      | C   |    |        |       |        |      |   |
| ATOM       | 336 | C    | ARG | 27 | 24.618 | 4.485 | 21.817 | 1.00 |   |
| 16.96      |     |      | C   |    |        |       |        |      |   |
| ATOM       | 337 | O    | ARG | 27 | 25.024 | 4.576 | 22.976 | 1.00 |   |

|            |     |      |     |    |        |        |        |      |  |
|------------|-----|------|-----|----|--------|--------|--------|------|--|
| 20.06      |     |      | O   |    |        |        |        |      |  |
| ATOM       | 338 | CB   | ARG | 27 | 25.661 | 2.627  | 20.519 | 1.00 |  |
| 22.14      |     |      | C   |    |        |        |        |      |  |
| ATOM       | 339 | CG   | ARG | 27 | 26.606 | 2.282  | 19.366 |      |  |
| 1.00124.30 |     |      | C   |    |        |        |        |      |  |
| ATOM       | 340 | CD   | ARG | 27 | 26.867 | 0.776  | 19.353 |      |  |
| 1.00109.38 |     |      | C   |    |        |        |        |      |  |
| ATOM       | 341 | NE   | ARG | 27 | 27.583 | 0.377  | 20.559 |      |  |
| 1.00227.73 |     |      | N   |    |        |        |        |      |  |
| ATOM       | 342 | CZ   | ARG | 27 | 27.843 | -0.901 | 20.812 |      |  |
| 1.00426.12 |     |      | C   |    |        |        |        |      |  |
| ATOM       | 343 | NH1  | ARG | 27 | 28.490 | -1.233 | 21.898 |      |  |
| 1.00767.09 |     |      | N1+ |    |        |        |        |      |  |
| ATOM       | 344 | NH2  | ARG | 27 | 27.453 | -1.825 | 19.978 |      |  |
| 1.00581.78 |     |      | N   |    |        |        |        |      |  |
| ATOM       | 345 | HN   | ARG | 27 | 27.324 | 4.475  | 21.856 | 1.00 |  |
| 30.75      |     |      | H   |    |        |        |        |      |  |
| ATOM       | 346 | HA   | ARG | 27 | 25.216 | 4.583  | 19.766 | 1.00 |  |
| 23.13      |     |      | H   |    |        |        |        |      |  |
| ATOM       | 347 | HB1  | ARG | 27 | 24.677 | 2.238  | 20.304 | 1.00 |  |
| 87.46      |     |      | H   |    |        |        |        |      |  |
| ATOM       | 348 | HB2  | ARG | 27 | 26.031 | 2.185  | 21.433 |      |  |
| 1.00103.36 |     |      | H   |    |        |        |        |      |  |
| ATOM       | 349 | HG1  | ARG | 27 | 27.541 | 2.806  | 19.497 |      |  |
| 1.00281.97 |     |      | H   |    |        |        |        |      |  |
| ATOM       | 350 | HG2  | ARG | 27 | 26.154 | 2.578  | 18.430 |      |  |
| 1.00276.19 |     |      | H   |    |        |        |        |      |  |
| ATOM       | 351 | HD1  | ARG | 27 | 27.457 | 0.523  | 18.484 |      |  |
| 1.00183.60 |     |      | H   |    |        |        |        |      |  |
| ATOM       | 352 | HD2  | ARG | 27 | 25.925 | 0.250  | 19.310 |      |  |
| 1.00142.93 |     |      | H   |    |        |        |        |      |  |
| ATOM       | 353 | HE   | ARG | 27 | 27.879 | 1.064  | 21.192 |      |  |
| 1.00372.53 |     |      | H   |    |        |        |        |      |  |
| ATOM       | 354 | HH11 | ARG | 27 | 28.790 | -0.526 | 22.537 |      |  |
| 1.00910.59 |     |      | H   |    |        |        |        |      |  |
| ATOM       | 355 | HH12 | ARG | 27 | 28.686 | -2.194 | 22.087 |      |  |
| 1.00999.99 |     |      | H   |    |        |        |        |      |  |
| ATOM       | 356 | HH21 | ARG | 27 | 26.956 | -1.570 | 19.148 |      |  |
| 1.00532.54 |     |      | H   |    |        |        |        |      |  |
| ATOM       | 357 | HH22 | ARG | 27 | 27.649 | -2.787 | 20.170 |      |  |
| 1.00948.84 |     |      | H   |    |        |        |        |      |  |
| ATOM       | 358 | N    | SER | 28 | 23.337 | 4.672  | 21.486 | 1.00 |  |
| 14.60      |     |      | N   |    |        |        |        |      |  |
| ATOM       | 359 | CA   | SER | 28 | 22.329 | 5.001  | 22.499 | 1.00 |  |
| 14.92      |     |      | C   |    |        |        |        |      |  |
| ATOM       | 360 | C    | SER | 28 | 21.089 | 4.132  | 22.327 | 1.00 |  |
| 12.12      |     |      | C   |    |        |        |        |      |  |
| ATOM       | 361 | O    | SER | 28 | 20.700 | 3.801  | 21.206 | 1.00 |  |
| 13.41      |     |      | O   |    |        |        |        |      |  |
| ATOM       | 362 | CB   | SER | 28 | 21.941 | 6.476  | 22.385 | 1.00 |  |
| 23.26      |     |      | C   |    |        |        |        |      |  |
| ATOM       | 363 | OG   | SER | 28 | 23.079 | 7.283  | 22.654 |      |  |



|            |     |     |     |     |        |        |        |      |
|------------|-----|-----|-----|-----|--------|--------|--------|------|
| 24.60      |     |     | H   |     |        |        |        |      |
| ATOM       | 390 | HB1 | GLU | 30  | 15.252 | 4.360  | 27.337 | 1.00 |
| 72.67      |     |     | H   |     |        |        |        |      |
| ATOM       | 391 | HB2 | GLU | 30  | 15.011 | 4.255  | 25.592 | 1.00 |
| 56.47      |     |     | H   |     |        |        |        |      |
| ATOM       | 392 | HG1 | GLU | 30  | 15.615 | 6.538  | 26.163 |      |
| 1.00196.66 |     |     |     | H   |        |        |        |      |
| ATOM       | 393 | HG2 | GLU | 30  | 16.955 | 5.803  | 25.287 |      |
| 1.00140.67 |     |     |     | H   |        |        |        |      |
| ATOM       | 394 | N   | LYS | 31  | 16.064 | 1.568  | 27.792 | 1.00 |
| 11.96      |     |     | N   |     |        |        |        |      |
| ATOM       | 395 | CA  | LYS | 31  | 15.476 | 0.276  | 28.153 | 1.00 |
| 11.40      |     |     | C   |     |        |        |        |      |
| ATOM       | 396 | C   | LYS | 31  | 14.181 | 0.484  | 28.928 | 1.00 |
| 10.99      |     |     | C   |     |        |        |        |      |
| ATOM       | 397 | O   | LYS | 31  | 14.073 | 1.404  | 29.740 | 1.00 |
| 12.86      |     |     | O   |     |        |        |        |      |
| ATOM       | 398 | CB  | LYS | 31  | 16.459 | -0.520 | 29.012 | 1.00 |
| 21.40      |     |     | C   |     |        |        |        |      |
| ATOM       | 399 | CG  | LYS | 31  | 17.738 | -0.784 | 28.209 | 1.00 |
| 57.81      |     |     | C   |     |        |        |        |      |
| ATOM       | 400 | CD  | LYS | 31  | 18.635 | -1.781 | 28.955 |      |
| 1.00115.52 |     |     |     | C   |        |        |        |      |
| ATOM       | 401 | CE  | LYS | 31  | 19.266 | -1.110 | 30.180 |      |
| 1.00250.23 |     |     |     | C   |        |        |        |      |
| ATOM       | 402 | NZ  | LYS | 31  | 20.316 | -2.005 | 30.746 |      |
| 1.00462.10 |     |     |     | N1+ |        |        |        |      |
| ATOM       | 403 | HN  | LYS | 31  | 16.378 | 2.165  | 28.503 | 1.00 |
| 26.13      |     |     | H   |     |        |        |        |      |
| ATOM       | 404 | HA  | LYS | 31  | 15.259 | -0.291 | 27.256 | 1.00 |
| 13.87      |     |     | H   |     |        |        |        |      |
| ATOM       | 405 | HB1 | LYS | 31  | 16.012 | -1.461 | 29.295 | 1.00 |
| 37.63      |     |     | H   |     |        |        |        |      |
| ATOM       | 406 | HB2 | LYS | 31  | 16.695 | 0.048  | 29.897 | 1.00 |
| 47.19      |     |     | H   |     |        |        |        |      |
| ATOM       | 407 | HG1 | LYS | 31  | 18.271 | 0.144  | 28.072 |      |
| 1.00126.32 |     |     |     | H   |        |        |        |      |
| ATOM       | 408 | HG2 | LYS | 31  | 17.475 | -1.192 | 27.244 |      |
| 1.00114.19 |     |     |     | H   |        |        |        |      |
| ATOM       | 409 | HD1 | LYS | 31  | 19.418 | -2.121 | 28.293 |      |
| 1.00198.45 |     |     |     | H   |        |        |        |      |
| ATOM       | 410 | HD2 | LYS | 31  | 18.044 | -2.626 | 29.274 |      |
| 1.00200.14 |     |     |     | H   |        |        |        |      |
| ATOM       | 411 | HE1 | LYS | 31  | 18.508 | -0.934 | 30.928 |      |
| 1.00374.64 |     |     |     | H   |        |        |        |      |
| ATOM       | 412 | HE2 | LYS | 31  | 19.712 | -0.170 | 29.890 |      |
| 1.00403.27 |     |     |     | H   |        |        |        |      |
| ATOM       | 413 | HZ1 | LYS | 31  | 19.875 | -2.875 | 31.104 |      |
| 1.00627.38 |     |     |     | H   |        |        |        |      |
| ATOM       | 414 | HZ2 | LYS | 31  | 20.805 | -1.517 | 31.524 |      |
| 1.00622.26 |     |     |     | H   |        |        |        |      |
| ATOM       | 415 | HZ3 | LYS | 31  | 21.002 | -2.249 | 30.003 |      |



|            |     |      |     |   |    |        |        |        |      |
|------------|-----|------|-----|---|----|--------|--------|--------|------|
| 1.00619.20 |     |      |     | H |    |        |        |        |      |
| ATOM       | 416 | N    | THR |   | 32 | 13.201 | -0.374 | 28.674 | 1.00 |
| 15.51      |     |      | N   |   |    |        |        |        |      |
| ATOM       | 417 | CA   | THR |   | 32 | 11.917 | -0.272 | 29.354 | 1.00 |
| 22.44      |     |      | C   |   |    |        |        |        |      |
| ATOM       | 418 | C    | THR |   | 32 | 12.054 | -0.676 | 30.817 | 1.00 |
| 26.60      |     |      | C   |   |    |        |        |        |      |
| ATOM       | 419 | O    | THR |   | 32 | 12.537 | -1.764 | 31.132 | 1.00 |
| 57.43      |     |      | O   |   |    |        |        |        |      |
| ATOM       | 420 | CB   | THR |   | 32 | 10.887 | -1.171 | 28.662 | 1.00 |
| 56.28      |     |      | C   |   |    |        |        |        |      |
| ATOM       | 421 | CG2  | THR |   | 32 | 9.536  | -1.041 | 29.367 |      |
| 1.00102.70 |     |      |     | C |    |        |        |        |      |
| ATOM       | 422 | OG1  | THR |   | 32 | 10.755 | -0.775 | 27.305 |      |
| 1.00111.17 |     |      |     | O |    |        |        |        |      |
| ATOM       | 423 | HN   | THR |   | 32 | 13.343 | -1.085 | 28.017 | 1.00 |
| 18.79      |     |      | H   |   |    |        |        |        |      |
| ATOM       | 424 | HA   | THR |   | 32 | 11.575 | 0.752  | 29.303 | 1.00 |
| 19.67      |     |      | H   |   |    |        |        |        |      |
| ATOM       | 425 | HB   | THR |   | 32 | 11.216 | -2.197 | 28.710 | 1.00 |
| 84.25      |     |      | H   |   |    |        |        |        |      |
| ATOM       | 426 | HG1  | THR |   | 32 | 11.000 | 0.152  | 27.239 |      |
| 1.00205.03 |     |      |     | H |    |        |        |        |      |
| ATOM       | 427 | HG21 | THR |   | 32 | 9.263  | 0.002  | 29.430 |      |
| 1.00220.71 |     |      |     | H |    |        |        |        |      |
| ATOM       | 428 | HG22 | THR |   | 32 | 9.607  | -1.456 | 30.361 |      |
| 1.00174.67 |     |      |     | H |    |        |        |        |      |
| ATOM       | 429 | HG23 | THR |   | 32 | 8.786  | -1.576 | 28.806 |      |
| 1.00217.44 |     |      |     | H |    |        |        |        |      |
| ATOM       | 430 | N    | THR |   | 33 | 11.620 | 0.211  | 31.706 | 1.00 |
| 22.47      |     |      | N   |   |    |        |        |        |      |
| ATOM       | 431 | CA   | THR |   | 33 | 11.689 | -0.050 | 33.141 | 1.00 |
| 41.60      |     |      | C   |   |    |        |        |        |      |
| ATOM       | 432 | C    | THR |   | 33 | 10.612 | 0.709  | 33.867 | 1.00 |
| 38.03      |     |      | C   |   |    |        |        |        |      |
| ATOM       | 433 | O    | THR |   | 33 | 10.814 | 1.836  | 34.316 | 1.00 |
| 52.73      |     |      | O   |   |    |        |        |        |      |
| ATOM       | 434 | CB   | THR |   | 33 | 13.061 | 0.340  | 33.693 | 1.00 |
| 63.25      |     |      | C   |   |    |        |        |        |      |
| ATOM       | 435 | CG2  | THR |   | 33 | 14.127 | -0.618 | 33.159 |      |
| 1.00121.65 |     |      |     | C |    |        |        |        |      |
| ATOM       | 436 | OG1  | THR |   | 33 | 13.370 | 1.668  | 33.290 | 1.00 |
| 96.20      |     |      | O   |   |    |        |        |        |      |
| ATOM       | 437 | HN   | THR |   | 33 | 11.244 | 1.058  | 31.390 | 1.00 |
| 23.82      |     |      | H   |   |    |        |        |        |      |
| ATOM       | 438 | HA   | THR |   | 33 | 11.518 | -1.093 | 33.328 | 1.00 |
| 67.12      |     |      | H   |   |    |        |        |        |      |
| ATOM       | 439 | HB   | THR |   | 33 | 13.044 | 0.287  | 34.770 |      |
| 1.00107.59 |     |      |     | H |    |        |        |        |      |
| ATOM       | 440 | HG1  | THR |   | 33 | 13.999 | 1.619  | 32.567 |      |
| 1.00176.27 |     |      |     | H |    |        |        |        |      |
| ATOM       | 441 | HG21 | THR |   | 33 | 15.045 | -0.478 | 33.710 |      |

|            |     |      |     |   |    |        |        |        |      |
|------------|-----|------|-----|---|----|--------|--------|--------|------|
| 1.00255.23 |     |      |     | H |    |        |        |        |      |
| ATOM       | 442 | HG22 | THR |   | 33 | 14.303 | -0.413 | 32.112 |      |
| 1.00245.37 |     |      |     | H |    |        |        |        |      |
| ATOM       | 443 | HG23 | THR |   | 33 | 13.788 | -1.637 | 33.274 |      |
| 1.00185.78 |     |      |     | H |    |        |        |        |      |
| ATOM       | 444 | N    | GLY |   | 34 | 9.465  | 0.065  | 33.993 | 1.00 |
| 40.93      |     |      | N   |   |    |        |        |        |      |
| ATOM       | 445 | CA   | GLY |   | 34 | 8.357  | 0.671  | 34.685 | 1.00 |
| 45.59      |     |      | C   |   |    |        |        |        |      |
| ATOM       | 446 | C    | GLY |   | 34 | 7.744  | 1.792  | 33.853 | 1.00 |
| 40.97      |     |      | C   |   |    |        |        |        |      |
| ATOM       | 447 | O    | GLY |   | 34 | 6.522  | 1.899  | 33.740 | 1.00 |
| 82.17      |     |      | O   |   |    |        |        |        |      |
| ATOM       | 448 | HN   | GLY |   | 34 | 9.372  | -0.838 | 33.625 | 1.00 |
| 54.00      |     |      | H   |   |    |        |        |        |      |
| ATOM       | 449 | HA1  | GLY |   | 34 | 8.728  | 1.071  | 35.607 | 1.00 |
| 54.41      |     |      | H   |   |    |        |        |        |      |
| ATOM       | 450 | HA2  | GLY |   | 34 | 7.608  | -0.079 | 34.892 | 1.00 |
| 62.09      |     |      | H   |   |    |        |        |        |      |
| ATOM       | 451 | N    | ASN |   | 35 | 8.604  | 2.623  | 33.265 | 1.00 |
| 32.51      |     |      | N   |   |    |        |        |        |      |
| ATOM       | 452 | CA   | ASN |   | 35 | 8.152  | 3.738  | 32.431 | 1.00 |
| 33.20      |     |      | C   |   |    |        |        |        |      |
| ATOM       | 453 | C    | ASN |   | 35 | 8.998  | 3.824  | 31.165 | 1.00 |
| 23.17      |     |      | C   |   |    |        |        |        |      |
| ATOM       | 454 | O    | ASN |   | 35 | 10.215 | 3.642  | 31.206 | 1.00 |
| 27.01      |     |      | O   |   |    |        |        |        |      |
| ATOM       | 455 | CB   | ASN |   | 35 | 8.260  | 5.051  | 33.206 | 1.00 |
| 54.51      |     |      | C   |   |    |        |        |        |      |
| ATOM       | 456 | CG   | ASN |   | 35 | 7.480  | 4.957  | 34.504 | 1.00 |
| 80.73      |     |      | C   |   |    |        |        |        |      |
| ATOM       | 457 | ND2  | ASN |   | 35 | 6.207  | 4.711  | 34.468 |      |
| 1.00220.46 |     |      |     | N |    |        |        |        |      |
| ATOM       | 458 | OD1  | ASN |   | 35 | 8.050  | 5.113  | 35.585 |      |
| 1.00117.80 |     |      |     | O |    |        |        |        |      |
| ATOM       | 459 | HN   | ASN |   | 35 | 9.566  | 2.481  | 33.391 | 1.00 |
| 51.15      |     |      | H   |   |    |        |        |        |      |
| ATOM       | 460 | HA   | ASN |   | 35 | 7.119  | 3.584  | 32.148 | 1.00 |
| 47.21      |     |      | H   |   |    |        |        |        |      |
| ATOM       | 461 | HB1  | ASN |   | 35 | 7.861  | 5.854  | 32.607 | 1.00 |
| 68.31      |     |      | H   |   |    |        |        |        |      |
| ATOM       | 462 | HB2  | ASN |   | 35 | 9.290  | 5.250  | 33.432 | 1.00 |
| 57.75      |     |      | H   |   |    |        |        |        |      |
| ATOM       | 463 | HD21 | ASN |   | 35 | 5.754  | 4.587  | 33.608 |      |
| 1.00405.39 |     |      |     | H |    |        |        |        |      |
| ATOM       | 464 | HD22 | ASN |   | 35 | 5.705  | 4.650  | 35.298 |      |
| 1.00245.64 |     |      |     | H |    |        |        |        |      |
| ATOM       | 465 | N    | PHE |   | 36 | 8.345  | 4.098  | 30.041 | 1.00 |
| 35.72      |     |      | N   |   |    |        |        |        |      |
| ATOM       | 466 | CA   | PHE |   | 36 | 9.036  | 4.202  | 28.765 | 1.00 |
| 33.41      |     |      | C   |   |    |        |        |        |      |
| ATOM       | 467 | C    | PHE |   | 36 | 9.638  | 5.593  | 28.588 | 1.00 |

|            |     |     |     |    |        |        |        |      |  |
|------------|-----|-----|-----|----|--------|--------|--------|------|--|
| 28.51      |     |     | C   |    |        |        |        |      |  |
| ATOM       | 468 | O   | PHE | 36 | 9.075  | 6.585  | 29.052 | 1.00 |  |
| 45.23      |     |     | O   |    |        |        |        |      |  |
| ATOM       | 469 | CB  | PHE | 36 | 8.045  | 3.926  | 27.640 | 1.00 |  |
| 67.53      |     |     | C   |    |        |        |        |      |  |
| ATOM       | 470 | CG  | PHE | 36 | 7.588  | 2.489  | 27.718 | 1.00 |  |
| 86.71      |     |     | C   |    |        |        |        |      |  |
| ATOM       | 471 | CD1 | PHE | 36 | 6.468  | 2.155  | 28.489 |      |  |
| 1.00106.51 |     |     |     | C  |        |        |        |      |  |
| ATOM       | 472 | CD2 | PHE | 36 | 8.281  | 1.492  | 27.020 | 1.00 |  |
| 99.48      |     |     | C   |    |        |        |        |      |  |
| ATOM       | 473 | CE1 | PHE | 36 | 6.040  | 0.824  | 28.562 |      |  |
| 1.00134.48 |     |     |     | C  |        |        |        |      |  |
| ATOM       | 474 | CE2 | PHE | 36 | 7.854  | 0.162  | 27.094 |      |  |
| 1.00134.27 |     |     |     | C  |        |        |        |      |  |
| ATOM       | 475 | CZ  | PHE | 36 | 6.733  | -0.173 | 27.864 |      |  |
| 1.00149.48 |     |     |     | C  |        |        |        |      |  |
| ATOM       | 476 | HN  | PHE | 36 | 7.376  | 4.229  | 30.065 | 1.00 |  |
| 62.87      |     |     | H   |    |        |        |        |      |  |
| ATOM       | 477 | HA  | PHE | 36 | 9.825  | 3.466  | 28.725 | 1.00 |  |
| 28.53      |     |     | H   |    |        |        |        |      |  |
| ATOM       | 478 | HB1 | PHE | 36 | 8.522  | 4.099  | 26.694 | 1.00 |  |
| 73.56      |     |     | H   |    |        |        |        |      |  |
| ATOM       | 479 | HB2 | PHE | 36 | 7.193  | 4.582  | 27.741 | 1.00 |  |
| 88.42      |     |     | H   |    |        |        |        |      |  |
| ATOM       | 480 | HD1 | PHE | 36 | 5.935  | 2.926  | 29.027 |      |  |
| 1.00110.20 |     |     |     | H  |        |        |        |      |  |
| ATOM       | 481 | HD2 | PHE | 36 | 9.147  | 1.750  | 26.427 | 1.00 |  |
| 93.07      |     |     | H   |    |        |        |        |      |  |
| ATOM       | 482 | HE1 | PHE | 36 | 5.176  | 0.567  | 29.156 |      |  |
| 1.00155.06 |     |     |     | H  |        |        |        |      |  |
| ATOM       | 483 | HE2 | PHE | 36 | 8.388  | -0.607 | 26.555 |      |  |
| 1.00159.46 |     |     |     | H  |        |        |        |      |  |
| ATOM       | 484 | HZ  | PHE | 36 | 6.403  | -1.199 | 27.920 |      |  |
| 1.00183.25 |     |     |     | H  |        |        |        |      |  |
| ATOM       | 485 | N   | THR | 37 | 10.786 | 5.658  | 27.913 | 1.00 |  |
| 20.06      |     |     | N   |    |        |        |        |      |  |
| ATOM       | 486 | CA  | THR | 37 | 11.469 | 6.927  | 27.672 | 1.00 |  |
| 27.18      |     |     | C   |    |        |        |        |      |  |
| ATOM       | 487 | C   | THR | 37 | 11.769 | 7.081  | 26.186 | 1.00 |  |
| 41.87      |     |     | C   |    |        |        |        |      |  |
| ATOM       | 488 | O   | THR | 37 | 11.007 | 6.622  | 25.335 |      |  |
| 1.00169.86 |     |     |     | O  |        |        |        |      |  |
| ATOM       | 489 | CB  | THR | 37 | 12.774 | 6.974  | 28.467 | 1.00 |  |
| 26.52      |     |     | C   |    |        |        |        |      |  |
| ATOM       | 490 | CG2 | THR | 37 | 12.492 | 6.653  | 29.935 | 1.00 |  |
| 75.69      |     |     | C   |    |        |        |        |      |  |
| ATOM       | 491 | OG1 | THR | 37 | 13.685 | 6.021  | 27.937 | 1.00 |  |
| 81.95      |     |     | O   |    |        |        |        |      |  |
| ATOM       | 492 | HN  | THR | 37 | 11.187 | 4.836  | 27.567 | 1.00 |  |
| 18.47      |     |     | H   |    |        |        |        |      |  |
| ATOM       | 493 | HA  | THR | 37 | 10.837 | 7.747  | 27.986 | 1.00 |  |

|            |     |      |     |     |        |        |        |      |  |
|------------|-----|------|-----|-----|--------|--------|--------|------|--|
| 38.80      |     |      | H   |     |        |        |        |      |  |
| ATOM       | 494 | HB   | THR | 37  | 13.205 | 7.962  | 28.395 | 1.00 |  |
| 81.60      |     |      | H   |     |        |        |        |      |  |
| ATOM       | 495 | HG1  | THR | 37  | 13.326 | 5.146  | 28.099 |      |  |
| 1.00188.80 |     |      |     | H   |        |        |        |      |  |
| ATOM       | 496 | HG21 | THR | 37  | 11.653 | 7.241  | 30.276 |      |  |
| 1.00196.98 |     |      |     | H   |        |        |        |      |  |
| ATOM       | 497 | HG22 | THR | 37  | 13.363 | 6.889  | 30.528 |      |  |
| 1.00196.23 |     |      |     | H   |        |        |        |      |  |
| ATOM       | 498 | HG23 | THR | 37  | 12.262 | 5.603  | 30.035 |      |  |
| 1.00168.92 |     |      |     | H   |        |        |        |      |  |
| ATOM       | 499 | N    | GLU | 38  | 12.884 | 7.730  | 25.884 | 1.00 |  |
| 26.53      |     |      | N   |     |        |        |        |      |  |
| ATOM       | 500 | CA   | GLU | 38  | 13.284 | 7.946  | 24.499 | 1.00 |  |
| 30.29      |     |      | C   |     |        |        |        |      |  |
| ATOM       | 501 | C    | GLU | 38  | 14.772 | 8.275  | 24.415 | 1.00 |  |
| 25.39      |     |      | C   |     |        |        |        |      |  |
| ATOM       | 502 | O    | GLU | 38  | 15.335 | 8.883  | 25.325 | 1.00 |  |
| 51.60      |     |      | O   |     |        |        |        |      |  |
| ATOM       | 503 | CB   | GLU | 38  | 12.471 | 9.093  | 23.894 | 1.00 |  |
| 54.82      |     |      | C   |     |        |        |        |      |  |
| ATOM       | 504 | CG   | GLU | 38  | 12.815 | 9.242  | 22.409 |      |  |
| 1.00165.84 |     |      |     | C   |        |        |        |      |  |
| ATOM       | 505 | CD   | GLU | 38  | 11.957 | 10.334 | 21.781 |      |  |
| 1.00292.92 |     |      |     | C   |        |        |        |      |  |
| ATOM       | 506 | OE1  | GLU | 38  | 11.157 | 10.916 | 22.496 |      |  |
| 1.00414.19 |     |      |     | O   |        |        |        |      |  |
| ATOM       | 507 | OE2  | GLU | 38  | 12.109 | 10.572 | 20.595 |      |  |
| 1.00537.65 |     |      |     | O1- |        |        |        |      |  |
| ATOM       | 508 | HN   | GLU | 38  | 13.448 | 8.067  | 26.609 | 1.00 |  |
| 84.50      |     |      | H   |     |        |        |        |      |  |
| ATOM       | 509 | HA   | GLU | 38  | 13.092 | 7.046  | 23.934 | 1.00 |  |
| 32.15      |     |      | H   |     |        |        |        |      |  |
| ATOM       | 510 | HB1  | GLU | 38  | 12.705 | 10.012 | 24.409 |      |  |
| 1.00144.82 |     |      |     | H   |        |        |        |      |  |
| ATOM       | 511 | HB2  | GLU | 38  | 11.416 | 8.879  | 23.998 |      |  |
| 1.00106.49 |     |      |     | H   |        |        |        |      |  |
| ATOM       | 512 | HG1  | GLU | 38  | 12.630 | 8.305  | 21.903 |      |  |
| 1.00303.31 |     |      |     | H   |        |        |        |      |  |
| ATOM       | 513 | HG2  | GLU | 38  | 13.859 | 9.503  | 22.307 |      |  |
| 1.00323.99 |     |      |     | H   |        |        |        |      |  |
| ATOM       | 514 | N    | CYS | 39  | 15.402 | 7.872  | 23.315 | 1.00 |  |
| 15.84      |     |      | N   |     |        |        |        |      |  |
| ATOM       | 515 | CA   | CYS | 39  | 16.823 | 8.134  | 23.122 | 1.00 |  |
| 14.30      |     |      | C   |     |        |        |        |      |  |
| ATOM       | 516 | C    | CYS | 39  | 17.075 | 9.646  | 23.090 | 1.00 |  |
| 22.31      |     |      | C   |     |        |        |        |      |  |
| ATOM       | 517 | O    | CYS | 39  | 16.202 | 10.408 | 22.674 | 1.00 |  |
| 32.92      |     |      | O   |     |        |        |        |      |  |
| ATOM       | 518 | CB   | CYS | 39  | 17.283 | 7.503  | 21.805 | 1.00 |  |
| 18.08      |     |      | C   |     |        |        |        |      |  |
| ATOM       | 519 | SG   | CYS | 39  | 16.165 | 8.009  | 20.476 | 1.00 |  |

|            |     |     |     |    |        |        |        |      |
|------------|-----|-----|-----|----|--------|--------|--------|------|
| 17.41      |     |     | S   |    |        |        |        |      |
| ATOM       | 520 | HN  | CYS | 39 | 14.901 | 7.396  | 22.622 | 1.00 |
| 24.87      |     |     | H   |    |        |        |        |      |
| ATOM       | 521 | HA  | CYS | 39 | 17.371 | 7.687  | 23.935 | 1.00 |
| 14.60      |     |     | H   |    |        |        |        |      |
| ATOM       | 522 | HB1 | CYS | 39 | 17.273 | 6.427  | 21.897 | 1.00 |
| 27.71      |     |     | H   |    |        |        |        |      |
| ATOM       | 523 | HB2 | CYS | 39 | 18.285 | 7.834  | 21.576 | 1.00 |
| 34.91      |     |     | H   |    |        |        |        |      |
| ATOM       | 524 | N   | PRO | 40 | 18.232 | 10.103 | 23.517 | 1.00 |
| 27.27      |     |     | N   |    |        |        |        |      |
| ATOM       | 525 | CA  | PRO | 40 | 18.554 | 11.558 | 23.524 | 1.00 |
| 47.66      |     |     | C   |    |        |        |        |      |
| ATOM       | 526 | C   | PRO | 40 | 18.850 | 12.085 | 22.122 | 1.00 |
| 71.54      |     |     | C   |    |        |        |        |      |
| ATOM       | 527 | O   | PRO | 40 | 19.590 | 11.469 | 21.355 | 1.00 |
| 87.70      |     |     | O   |    |        |        |        |      |
| ATOM       | 528 | CB  | PRO | 40 | 19.792 | 11.642 | 24.426 | 1.00 |
| 53.85      |     |     | C   |    |        |        |        |      |
| ATOM       | 529 | CG  | PRO | 40 | 20.475 | 10.326 | 24.244 | 1.00 |
| 46.04      |     |     | C   |    |        |        |        |      |
| ATOM       | 530 | CD  | PRO | 40 | 19.357 | 9.299  | 24.033 | 1.00 |
| 25.70      |     |     | C   |    |        |        |        |      |
| ATOM       | 531 | HA  | PRO | 40 | 17.746 | 12.117 | 23.968 | 1.00 |
| 58.04      |     |     | H   |    |        |        |        |      |
| ATOM       | 532 | HB1 | PRO | 40 | 19.498 | 11.766 | 25.458 | 1.00 |
| 67.93      |     |     | H   |    |        |        |        |      |
| ATOM       | 533 | HB2 | PRO | 40 | 20.437 | 12.455 | 24.116 | 1.00 |
| 70.99      |     |     | H   |    |        |        |        |      |
| ATOM       | 534 | HG1 | PRO | 40 | 21.045 | 10.071 | 25.125 | 1.00 |
| 65.91      |     |     | H   |    |        |        |        |      |
| ATOM       | 535 | HG2 | PRO | 40 | 21.123 | 10.362 | 23.376 | 1.00 |
| 54.99      |     |     | H   |    |        |        |        |      |
| ATOM       | 536 | HD1 | PRO | 40 | 19.084 | 8.834  | 24.969 | 1.00 |
| 24.22      |     |     | H   |    |        |        |        |      |
| ATOM       | 537 | HD2 | PRO | 40 | 19.657 | 8.557  | 23.309 | 1.00 |
| 26.94      |     |     | H   |    |        |        |        |      |
| ATOM       | 538 | N   | GLY | 41 | 18.268 | 13.233 | 21.803 |      |
| 1.00105.24 |     |     |     | N  |        |        |        |      |
| ATOM       | 539 | CA  | GLY | 41 | 18.473 | 13.850 | 20.497 |      |
| 1.00147.55 |     |     |     | C  |        |        |        |      |
| ATOM       | 540 | C   | GLY | 41 | 19.934 | 14.230 | 20.300 |      |
| 1.00161.74 |     |     |     | C  |        |        |        |      |
| ATOM       | 541 | O   | GLY | 41 | 20.488 | 14.070 | 19.212 |      |
| 1.00244.37 |     |     |     | O  |        |        |        |      |
| ATOM       | 542 | HN  | GLY | 41 | 17.694 | 13.674 | 22.460 |      |
| 1.00121.79 |     |     |     | H  |        |        |        |      |
| ATOM       | 543 | HA1 | GLY | 41 | 17.865 | 14.738 | 20.425 |      |
| 1.00184.40 |     |     |     | H  |        |        |        |      |
| ATOM       | 544 | HA2 | GLY | 41 | 18.180 | 13.154 | 19.727 |      |
| 1.00157.34 |     |     |     | H  |        |        |        |      |
| ATOM       | 545 | N   | LEU | 42 | 20.550 | 14.736 | 21.363 |      |

|            |     |      |     |    |        |        |        |  |
|------------|-----|------|-----|----|--------|--------|--------|--|
| 1.00162.48 |     |      |     | N  |        |        |        |  |
| ATOM       | 546 | CA   | LEU | 42 | 21.952 | 15.148 | 21.316 |  |
| 1.00191.48 |     |      |     | C  |        |        |        |  |
| ATOM       | 547 | C    | LEU | 42 | 22.853 | 14.022 | 21.815 |  |
| 1.00166.66 |     |      |     | C  |        |        |        |  |
| ATOM       | 548 | O    | LEU | 42 | 22.438 | 13.196 | 22.628 |  |
| 1.00251.38 |     |      |     | O  |        |        |        |  |
| ATOM       | 549 | CB   | LEU | 42 | 22.159 | 16.387 | 22.188 |  |
| 1.00307.99 |     |      |     | C  |        |        |        |  |
| ATOM       | 550 | CG   | LEU | 42 | 21.146 | 17.470 | 21.802 |  |
| 1.00452.28 |     |      |     | C  |        |        |        |  |
| ATOM       | 551 | CD1  | LEU | 42 | 21.373 | 18.707 | 22.677 |  |
| 1.00681.24 |     |      |     | C  |        |        |        |  |
| ATOM       | 552 | CD2  | LEU | 42 | 21.315 | 17.843 | 20.321 |  |
| 1.00527.46 |     |      |     | C  |        |        |        |  |
| ATOM       | 553 | HN   | LEU | 42 | 20.049 | 14.839 | 22.199 |  |
| 1.00195.47 |     |      |     | H  |        |        |        |  |
| ATOM       | 554 | HA   | LEU | 42 | 22.226 | 15.387 | 20.298 |  |
| 1.00229.77 |     |      |     | H  |        |        |        |  |
| ATOM       | 555 | HB1  | LEU | 42 | 23.159 | 16.766 | 22.043 |  |
| 1.00342.49 |     |      |     | H  |        |        |        |  |
| ATOM       | 556 | HB2  | LEU | 42 | 22.023 | 16.121 | 23.228 |  |
| 1.00335.33 |     |      |     | H  |        |        |        |  |
| ATOM       | 557 | HG   | LEU | 42 | 20.145 | 17.097 | 21.968 |  |
| 1.00427.79 |     |      |     | H  |        |        |        |  |
| ATOM       | 558 | HD11 | LEU | 42 | 22.357 | 19.107 | 22.488 |  |
| 1.00909.71 |     |      |     | H  |        |        |        |  |
| ATOM       | 559 | HD12 | LEU | 42 | 21.288 | 18.432 | 23.718 |  |
| 1.00706.80 |     |      |     | H  |        |        |        |  |
| ATOM       | 560 | HD13 | LEU | 42 | 20.629 | 19.455 | 22.441 |  |
| 1.00858.82 |     |      |     | H  |        |        |        |  |
| ATOM       | 561 | HD21 | LEU | 42 | 20.895 | 18.824 | 20.143 |  |
| 1.00631.69 |     |      |     | H  |        |        |        |  |
| ATOM       | 562 | HD22 | LEU | 42 | 20.800 | 17.120 | 19.707 |  |
| 1.00628.06 |     |      |     | H  |        |        |        |  |
| ATOM       | 563 | HD23 | LEU | 42 | 22.365 | 17.851 | 20.065 |  |
| 1.00656.75 |     |      |     | H  |        |        |        |  |
| ATOM       | 564 | N    | THR | 43 | 24.085 | 13.995 | 21.319 |  |
| 1.00178.52 |     |      |     | N  |        |        |        |  |
| ATOM       | 565 | CA   | THR | 43 | 25.036 | 12.965 | 21.722 |  |
| 1.00240.84 |     |      |     | C  |        |        |        |  |
| ATOM       | 566 | C    | THR | 43 | 25.387 | 13.123 | 23.206 |  |
| 1.00372.31 |     |      |     | C  |        |        |        |  |
| ATOM       | 567 | O    | THR | 43 | 25.379 | 14.237 | 23.726 |  |
| 1.00500.13 |     |      |     | O  |        |        |        |  |
| ATOM       | 568 | CB   | THR | 43 | 26.307 | 13.091 | 20.875 |  |
| 1.00354.13 |     |      |     | C  |        |        |        |  |
| ATOM       | 569 | CG2  | THR | 43 | 25.937 | 13.066 | 19.392 |  |
| 1.00463.04 |     |      |     | C  |        |        |        |  |
| ATOM       | 570 | OG1  | THR | 43 | 26.957 | 14.318 | 21.181 |  |
| 1.00508.50 |     |      |     | O  |        |        |        |  |
| ATOM       | 571 | HN   | THR | 43 | 24.361 | 14.677 | 20.673 |  |

|            |     |      |     |   |    |        |        |        |
|------------|-----|------|-----|---|----|--------|--------|--------|
| 1.00229.59 |     |      |     | H |    |        |        |        |
| ATOM       | 572 | HA   | THR | H | 43 | 24.593 | 11.998 | 21.550 |
| 1.00249.90 |     |      |     | H |    |        |        |        |
| ATOM       | 573 | HB   | THR | H | 43 | 26.972 | 12.270 | 21.089 |
| 1.00481.58 |     |      |     | H |    |        |        |        |
| ATOM       | 574 | HG1  | THR | H | 43 | 27.782 | 14.346 | 20.695 |
| 1.00624.31 |     |      |     | H |    |        |        |        |
| ATOM       | 575 | HG21 | THR | H | 43 | 25.322 | 13.922 | 19.160 |
| 1.00650.95 |     |      |     | H |    |        |        |        |
| ATOM       | 576 | HG22 | THR | H | 43 | 25.393 | 12.160 | 19.171 |
| 1.00580.73 |     |      |     | H |    |        |        |        |
| ATOM       | 577 | HG23 | THR | H | 43 | 26.838 | 13.098 | 18.796 |
| 1.00571.99 |     |      |     | H |    |        |        |        |
| ATOM       | 578 | N    | PRO | N | 44 | 25.697 | 12.047 | 23.900 |
| 1.00488.39 |     |      |     | N |    |        |        |        |
| ATOM       | 579 | CA   | PRO | N | 44 | 26.055 | 12.115 | 25.347 |
| 1.00760.13 |     |      |     | C |    |        |        |        |
| ATOM       | 580 | C    | PRO | C | 44 | 27.460 | 12.677 | 25.549 |
| 1.00735.36 |     |      |     | C |    |        |        |        |
| ATOM       | 581 | O    | PRO | C | 44 | 27.867 | 12.974 | 26.672 |
| 1.00999.99 |     |      |     | O |    |        |        |        |
| ATOM       | 582 | CB   | PRO | O | 44 | 25.963 | 10.654 | 25.806 |
| 1.00999.99 |     |      |     | C |    |        |        |        |
| ATOM       | 583 | CG   | PRO | C | 44 | 26.295 | 9.860  | 24.586 |
| 1.00856.94 |     |      |     | C |    |        |        |        |
| ATOM       | 584 | CD   | PRO | C | 44 | 25.745 | 10.657 | 23.400 |
| 1.00548.09 |     |      |     | C |    |        |        |        |
| ATOM       | 585 | HA   | PRO | C | 44 | 25.334 | 12.711 | 25.884 |
| 1.00939.00 |     |      |     | H |    |        |        |        |
| ATOM       | 586 | HB1  | PRO | H | 44 | 24.959 | 10.426 | 26.133 |
| 1.00999.99 |     |      |     | H |    |        |        |        |
| ATOM       | 587 | HB2  | PRO | H | 44 | 26.672 | 10.457 | 26.599 |
| 1.00999.99 |     |      |     | H |    |        |        |        |
| ATOM       | 588 | HG1  | PRO | H | 44 | 25.823 | 8.889  | 24.628 |
| 1.00999.99 |     |      |     | H |    |        |        |        |
| ATOM       | 589 | HG2  | PRO | H | 44 | 27.370 | 9.747  | 24.500 |
| 1.00853.53 |     |      |     | H |    |        |        |        |
| ATOM       | 590 | HD1  | PRO | H | 44 | 24.754 | 10.319 | 23.140 |
| 1.00602.45 |     |      |     | H |    |        |        |        |
| ATOM       | 591 | HD2  | PRO | H | 44 | 26.411 | 10.577 | 22.551 |
| 1.00463.32 |     |      |     | H |    |        |        |        |
| ATOM       | 592 | N    | ILE | N | 45 | 28.193 | 12.813 | 24.449 |
| 1.00518.33 |     |      |     | N |    |        |        |        |
| ATOM       | 593 | CA   | ILE | N | 45 | 29.553 | 13.333 | 24.508 |
| 1.00582.79 |     |      |     | C |    |        |        |        |
| ATOM       | 594 | C    | ILE | C | 45 | 29.553 | 14.753 | 25.059 |
| 1.00795.93 |     |      |     | C |    |        |        |        |
| ATOM       | 595 | O    | ILE | C | 45 | 30.368 | 15.100 | 25.915 |
| 1.00898.75 |     |      |     | O |    |        |        |        |
| ATOM       | 596 | CB   | ILE | O | 45 | 30.173 | 13.334 | 23.107 |
| 1.00474.41 |     |      |     | C |    |        |        |        |
| ATOM       | 597 | CG1  | ILE | C | 45 | 30.207 | 11.903 | 22.539 |

|            |     |      |     |   |    |        |        |        |
|------------|-----|------|-----|---|----|--------|--------|--------|
| 1.00516.90 |     |      |     | C |    |        |        |        |
| ATOM       | 598 | CG2  | ILE |   | 45 | 31.593 | 13.901 | 23.171 |
| 1.00760.75 |     |      |     | C |    |        |        |        |
| ATOM       | 599 | CD1  | ILE |   | 45 | 30.965 | 10.950 | 23.474 |
| 1.00566.81 |     |      |     | C |    |        |        |        |
| ATOM       | 600 | HN   | ILE |   | 45 | 27.815 | 12.555 | 23.583 |
| 1.00395.72 |     |      |     | H |    |        |        |        |
| ATOM       | 601 | HA   | ILE |   | 45 | 30.139 | 12.710 | 25.156 |
| 1.00711.06 |     |      |     | H |    |        |        |        |
| ATOM       | 602 | HB   | ILE |   | 45 | 29.574 | 13.959 | 22.460 |
| 1.00477.81 |     |      |     | H |    |        |        |        |
| ATOM       | 603 | HG11 | ILE |   | 45 | 30.693 | 11.916 | 21.575 |
| 1.00624.28 |     |      |     | H |    |        |        |        |
| ATOM       | 604 | HG12 | ILE |   | 45 | 29.194 | 11.547 | 22.418 |
| 1.00744.84 |     |      |     | H |    |        |        |        |
| ATOM       | 605 | HG21 | ILE |   | 45 | 32.098 | 13.713 | 22.236 |
| 1.00920.57 |     |      |     | H |    |        |        |        |
| ATOM       | 606 | HG22 | ILE |   | 45 | 32.134 | 13.427 | 23.975 |
| 1.00999.99 |     |      |     | H |    |        |        |        |
| ATOM       | 607 | HG23 | ILE |   | 45 | 31.548 | 14.966 | 23.346 |
| 1.00865.46 |     |      |     | H |    |        |        |        |
| ATOM       | 608 | HD11 | ILE |   | 45 | 30.288 | 10.568 | 24.225 |
| 1.00658.89 |     |      |     | H |    |        |        |        |
| ATOM       | 609 | HD12 | ILE |   | 45 | 31.779 | 11.471 | 23.956 |
| 1.00734.30 |     |      |     | H |    |        |        |        |
| ATOM       | 610 | HD13 | ILE |   | 45 | 31.360 | 10.126 | 22.899 |
| 1.00675.84 |     |      |     | H |    |        |        |        |
| ATOM       | 611 | N    | ALA |   | 46 | 28.634 | 15.568 | 24.563 |
| 1.00999.99 |     |      |     | N |    |        |        |        |
| ATOM       | 612 | CA   | ALA |   | 46 | 28.530 | 16.952 | 25.008 |
| 1.00999.99 |     |      |     | C |    |        |        |        |
| ATOM       | 613 | C    | ALA |   | 46 | 27.896 | 17.024 | 26.393 |
| 1.00999.99 |     |      |     | C |    |        |        |        |
| ATOM       | 614 | CB   | ALA |   | 46 | 27.686 | 17.758 | 24.017 |
| 1.00999.99 |     |      |     | C |    |        |        |        |
| ATOM       | 615 | OT1  | ALA |   | 46 | 28.622 | 17.270 | 27.343 |
| 1.00999.99 |     |      |     | O |    |        |        |        |
| ATOM       | 616 | OT2  | ALA |   | 46 | 26.695 | 16.830 | 26.485 |
| 1.00999.99 |     |      |     | O |    |        |        |        |
| ATOM       | 617 | HN   | ALA |   | 46 | 28.014 | 15.231 | 23.885 |
| 1.00999.99 |     |      |     | H |    |        |        |        |
| ATOM       | 618 | HA   | ALA |   | 46 | 29.519 | 17.382 | 25.052 |
| 1.00999.99 |     |      |     | H |    |        |        |        |
| ATOM       | 619 | HB1  | ALA |   | 46 | 28.245 | 17.903 | 23.105 |
| 1.00999.99 |     |      |     | H |    |        |        |        |
| ATOM       | 620 | HB2  | ALA |   | 46 | 27.443 | 18.717 | 24.448 |
| 1.00999.99 |     |      |     | H |    |        |        |        |
| ATOM       | 621 | HB3  | ALA |   | 46 | 26.775 | 17.219 | 23.800 |
| 1.00999.99 |     |      |     | H |    |        |        |        |
| ENDMDL     |     |      |     |   |    |        |        |        |
| TER        |     |      |     |   |    |        |        |        |
| MODEL      |     |      |     |   | 19 |        |        |        |



|            |    |      |     |   |        |        |        |
|------------|----|------|-----|---|--------|--------|--------|
| ATOM       | 1  | N    | GLY | 1 | 27.688 | 0.229  | 15.683 |
| 1.00999.99 |    |      | N   |   |        |        |        |
| ATOM       | 2  | CA   | GLY | 1 | 26.988 | -0.149 | 14.421 |
| 1.00999.99 |    |      | C   |   |        |        |        |
| ATOM       | 3  | C    | GLY | 1 | 25.732 | 0.701  | 14.262 |
| 1.00999.99 |    |      | C   |   |        |        |        |
| ATOM       | 4  | O    | GLY | 1 | 25.568 | 1.716  | 14.938 |
| 1.00999.99 |    |      | O   |   |        |        |        |
| ATOM       | 5  | HA1  | GLY | 1 | 26.710 | -1.191 | 14.461 |
| 1.00999.99 |    |      | H   |   |        |        |        |
| ATOM       | 6  | HA2  | GLY | 1 | 27.647 | 0.018  | 13.581 |
| 1.00999.99 |    |      | H   |   |        |        |        |
| ATOM       | 7  | HT1  | GLY | 1 | 27.899 | -0.629 | 16.232 |
| 1.00999.99 |    |      | H   |   |        |        |        |
| ATOM       | 8  | HT2  | GLY | 1 | 27.076 | 0.858  | 16.243 |
| 1.00999.99 |    |      | H   |   |        |        |        |
| ATOM       | 9  | HT3  | GLY | 1 | 28.575 | 0.719  | 15.454 |
| 1.00999.99 |    |      | H   |   |        |        |        |
| ATOM       | 10 | N    | LEU | 2 | 24.845 | 0.277  | 13.361 |
| 1.00999.99 |    |      | N   |   |        |        |        |
| ATOM       | 11 | CA   | LEU | 2 | 23.595 | 0.999  | 13.108 |
| 1.00895.59 |    |      | C   |   |        |        |        |
| ATOM       | 12 | C    | LEU | 2 | 22.413 | 0.226  | 13.685 |
| 1.00532.27 |    |      | C   |   |        |        |        |
| ATOM       | 13 | O    | LEU | 2 | 22.396 | -1.005 | 13.658 |
| 1.00625.21 |    |      | O   |   |        |        |        |
| ATOM       | 14 | CB   | LEU | 2 | 23.397 | 1.174  | 11.599 |
| 1.00999.99 |    |      | C   |   |        |        |        |
| ATOM       | 15 | CG   | LEU | 2 | 24.617 | 1.871  | 10.986 |
| 1.00999.99 |    |      | C   |   |        |        |        |
| ATOM       | 16 | CD1  | LEU | 2 | 24.420 | 1.992  | 9.473  |
| 1.00999.99 |    |      | C   |   |        |        |        |
| ATOM       | 17 | CD2  | LEU | 2 | 24.788 | 3.272  | 11.599 |
| 1.00999.99 |    |      | C   |   |        |        |        |
| ATOM       | 18 | HN   | LEU | 2 | 25.036 | -0.541 | 12.854 |
| 1.00999.99 |    |      | H   |   |        |        |        |
| ATOM       | 19 | HA   | LEU | 2 | 23.635 | 1.975  | 13.571 |
| 1.00890.87 |    |      | H   |   |        |        |        |
| ATOM       | 20 | HB1  | LEU | 2 | 22.517 | 1.774  | 11.421 |
| 1.00924.07 |    |      | H   |   |        |        |        |
| ATOM       | 21 | HB2  | LEU | 2 | 23.268 | 0.204  | 11.141 |
| 1.00999.99 |    |      | H   |   |        |        |        |
| ATOM       | 22 | HG   | LEU | 2 | 25.501 | 1.280  | 11.185 |
| 1.00999.99 |    |      | H   |   |        |        |        |
| ATOM       | 23 | HD11 | LEU | 2 | 24.072 | 1.048  | 9.078  |
| 1.00999.99 |    |      | H   |   |        |        |        |
| ATOM       | 24 | HD12 | LEU | 2 | 25.358 | 2.253  | 9.007  |
| 1.00999.99 |    |      | H   |   |        |        |        |
| ATOM       | 25 | HD13 | LEU | 2 | 23.689 | 2.759  | 9.266  |
| 1.00999.99 |    |      | H   |   |        |        |        |
| ATOM       | 26 | HD21 | LEU | 2 | 25.314 | 3.192  | 12.539 |
| 1.00999.99 |    |      | H   |   |        |        |        |

|            |    |      |     |   |        |        |        |      |
|------------|----|------|-----|---|--------|--------|--------|------|
| ATOM       | 27 | HD22 | LEU | 2 | 23.818 | 3.719  | 11.766 |      |
| 1.00999.99 |    |      | H   |   |        |        |        |      |
| ATOM       | 28 | HD23 | LEU | 2 | 25.358 | 3.898  | 10.925 |      |
| 1.00999.99 |    |      | H   |   |        |        |        |      |
| ATOM       | 29 | N    | CYS | 3 | 21.427 | 0.951  | 14.206 |      |
| 1.00271.28 |    |      | N   |   |        |        |        |      |
| ATOM       | 30 | CA   | CYS | 3 | 20.250 | 0.309  | 14.781 |      |
| 1.00104.50 |    |      | C   |   |        |        |        |      |
| ATOM       | 31 | C    | CYS | 3 | 19.485 | -0.451 | 13.701 | 1.00 |
| 90.98      |    |      | C   |   |        |        |        |      |
| ATOM       | 32 | O    | CYS | 3 | 19.395 | 0.001  | 12.560 |      |
| 1.00207.28 |    |      | O   |   |        |        |        |      |
| ATOM       | 33 | CB   | CYS | 3 | 19.331 | 1.358  | 15.415 | 1.00 |
| 37.83      |    |      | C   |   |        |        |        |      |
| ATOM       | 34 | SG   | CYS | 3 | 20.176 | 2.154  | 16.804 | 1.00 |
| 81.56      |    |      | S   |   |        |        |        |      |
| ATOM       | 35 | HN   | CYS | 3 | 21.491 | 1.929  | 14.200 |      |
| 1.00296.55 |    |      | H   |   |        |        |        |      |
| ATOM       | 36 | HA   | CYS | 3 | 20.566 | -0.387 | 15.544 |      |
| 1.00166.45 |    |      | H   |   |        |        |        |      |
| ATOM       | 37 | HB1  | CYS | 3 | 18.430 | 0.879  | 15.769 | 1.00 |
| 40.38      |    |      | H   |   |        |        |        |      |
| ATOM       | 38 | HB2  | CYS | 3 | 19.074 | 2.103  | 14.677 | 1.00 |
| 98.45      |    |      | H   |   |        |        |        |      |
| ATOM       | 39 | N    | SER | 4 | 18.938 | -1.605 | 14.067 | 1.00 |
| 85.31      |    |      | N   |   |        |        |        |      |
| ATOM       | 40 | CA   | SER | 4 | 18.185 | -2.416 | 13.115 | 1.00 |
| 92.94      |    |      | C   |   |        |        |        |      |
| ATOM       | 41 | C    | SER | 4 | 16.994 | -1.637 | 12.591 | 1.00 |
| 67.37      |    |      | C   |   |        |        |        |      |
| ATOM       | 42 | O    | SER | 4 | 16.689 | -1.662 | 11.399 |      |
| 1.00102.28 |    |      | O   |   |        |        |        |      |
| ATOM       | 43 | CB   | SER | 4 | 17.663 | -3.676 | 13.799 |      |
| 1.00123.83 |    |      | C   |   |        |        |        |      |
| ATOM       | 44 | OG   | SER | 4 | 17.057 | -4.519 | 12.828 |      |
| 1.00178.89 |    |      | O   |   |        |        |        |      |
| ATOM       | 45 | HN   | SER | 4 | 19.042 | -1.917 | 14.990 |      |
| 1.00163.03 |    |      | H   |   |        |        |        |      |
| ATOM       | 46 | HA   | SER | 4 | 18.825 | -2.697 | 12.293 |      |
| 1.00129.78 |    |      | H   |   |        |        |        |      |
| ATOM       | 47 | HB1  | SER | 4 | 16.926 | -3.389 | 14.545 |      |
| 1.00105.26 |    |      | H   |   |        |        |        |      |
| ATOM       | 48 | HB2  | SER | 4 | 18.474 | -4.201 | 14.276 |      |
| 1.00156.87 |    |      | H   |   |        |        |        |      |
| ATOM       | 49 | HG   | SER | 4 | 17.749 | -4.855 | 12.254 |      |
| 1.00218.16 |    |      | H   |   |        |        |        |      |
| ATOM       | 50 | N    | GLU | 5 | 16.310 | -0.966 | 13.509 | 1.00 |
| 41.67      |    |      | N   |   |        |        |        |      |
| ATOM       | 51 | CA   | GLU | 5 | 15.125 | -0.193 | 13.169 | 1.00 |
| 41.21      |    |      | C   |   |        |        |        |      |
| ATOM       | 52 | C    | GLU | 5 | 14.990 | 1.010  | 14.096 | 1.00 |
| 41.92      |    |      | C   |   |        |        |        |      |

|            |    |      |     |   |        |        |        |      |
|------------|----|------|-----|---|--------|--------|--------|------|
| ATOM       | 53 | O    | GLU | 5 | 15.939 | 1.380  | 14.787 | 1.00 |
| 74.72      |    |      | O   |   |        |        |        |      |
| ATOM       | 54 | CB   | GLU | 5 | 13.893 | -1.084 | 13.290 | 1.00 |
| 49.24      |    |      | C   |   |        |        |        |      |
| ATOM       | 55 | CG   | GLU | 5 | 13.828 | -1.654 | 14.701 | 1.00 |
| 55.48      |    |      | C   |   |        |        |        |      |
| ATOM       | 56 | CD   | GLU | 5 | 12.745 | -2.726 | 14.785 | 1.00 |
| 92.06      |    |      | C   |   |        |        |        |      |
| ATOM       | 57 | OE1  | GLU | 5 | 12.109 | -2.978 | 13.775 |      |
| 1.00206.49 |    |      | O   |   |        |        |        |      |
| ATOM       | 58 | OE2  | GLU | 5 | 12.568 | -3.279 | 15.858 |      |
| 1.00197.24 |    |      | O1- |   |        |        |        |      |
| ATOM       | 59 | HN   | GLU | 5 | 16.601 | -1.007 | 14.443 | 1.00 |
| 45.52      |    |      | H   |   |        |        |        |      |
| ATOM       | 60 | HA   | GLU | 5 | 15.202 | 0.151  | 12.157 | 1.00 |
| 60.63      |    |      | H   |   |        |        |        |      |
| ATOM       | 61 | HB1  | GLU | 5 | 13.959 | -1.893 | 12.580 | 1.00 |
| 61.59      |    |      | H   |   |        |        |        |      |
| ATOM       | 62 | HB2  | GLU | 5 | 13.010 | -0.505 | 13.096 | 1.00 |
| 63.66      |    |      | H   |   |        |        |        |      |
| ATOM       | 63 | HG1  | GLU | 5 | 13.603 | -0.862 | 15.399 | 1.00 |
| 58.03      |    |      | H   |   |        |        |        |      |
| ATOM       | 64 | HG2  | GLU | 5 | 14.783 | -2.087 | 14.944 | 1.00 |
| 57.77      |    |      | H   |   |        |        |        |      |
| ATOM       | 65 | N    | ASN | 6 | 13.810 | 1.618  | 14.106 | 1.00 |
| 50.73      |    |      | N   |   |        |        |        |      |
| ATOM       | 66 | CA   | ASN | 6 | 13.573 | 2.778  | 14.955 | 1.00 |
| 71.04      |    |      | C   |   |        |        |        |      |
| ATOM       | 67 | C    | ASN | 6 | 13.786 | 2.411  | 16.419 | 1.00 |
| 65.17      |    |      | C   |   |        |        |        |      |
| ATOM       | 68 | O    | ASN | 6 | 14.347 | 3.189  | 17.191 | 1.00 |
| 94.86      |    |      | O   |   |        |        |        |      |
| ATOM       | 69 | CB   | ASN | 6 | 12.146 | 3.290  | 14.756 | 1.00 |
| 94.83      |    |      | C   |   |        |        |        |      |
| ATOM       | 70 | CG   | ASN | 6 | 12.013 | 3.947  | 13.387 |      |
| 1.00160.94 |    |      | C   |   |        |        |        |      |
| ATOM       | 71 | ND2  | ASN | 6 | 10.830 | 4.086  | 12.852 |      |
| 1.00244.88 |    |      | N   |   |        |        |        |      |
| ATOM       | 72 | OD1  | ASN | 6 | 13.013 | 4.342  | 12.787 |      |
| 1.00219.73 |    |      | O   |   |        |        |        |      |
| ATOM       | 73 | HN   | ASN | 6 | 13.088 | 1.282  | 13.535 | 1.00 |
| 72.81      |    |      | H   |   |        |        |        |      |
| ATOM       | 74 | HA   | ASN | 6 | 14.267 | 3.560  | 14.684 | 1.00 |
| 96.02      |    |      | H   |   |        |        |        |      |
| ATOM       | 75 | HB1  | ASN | 6 | 11.914 | 4.013  | 15.523 |      |
| 1.00111.09 |    |      | H   |   |        |        |        |      |
| ATOM       | 76 | HB2  | ASN | 6 | 11.456 | 2.461  | 14.824 | 1.00 |
| 98.13      |    |      | H   |   |        |        |        |      |
| ATOM       | 77 | HD21 | ASN | 6 | 10.036 | 3.770  | 13.331 |      |
| 1.00272.43 |    |      | H   |   |        |        |        |      |
| ATOM       | 78 | HD22 | ASN | 6 | 10.736 | 4.508  | 11.972 |      |
| 1.00336.78 |    |      | H   |   |        |        |        |      |

|            |     |     |     |   |        |        |        |      |
|------------|-----|-----|-----|---|--------|--------|--------|------|
| ATOM       | 79  | N   | GLY | 7 | 13.341 | 1.211  | 16.793 | 1.00 |
| 51.80      |     |     | N   |   |        |        |        |      |
| ATOM       | 80  | CA  | GLY | 7 | 13.487 | 0.726  | 18.168 | 1.00 |
| 71.47      |     |     | C   |   |        |        |        |      |
| ATOM       | 81  | C   | GLY | 7 | 14.129 | -0.655 | 18.182 | 1.00 |
| 41.04      |     |     | C   |   |        |        |        |      |
| ATOM       | 82  | O   | GLY | 7 | 13.452 | -1.665 | 18.372 | 1.00 |
| 44.54      |     |     | O   |   |        |        |        |      |
| ATOM       | 83  | HN  | GLY | 7 | 12.908 | 0.636  | 16.129 | 1.00 |
| 45.49      |     |     | H   |   |        |        |        |      |
| ATOM       | 84  | HA1 | GLY | 7 | 12.516 | 0.665  | 18.626 |      |
| 1.00103.52 |     |     |     |   |        |        |        | H    |
| ATOM       | 85  | HA2 | GLY | 7 | 14.105 | 1.411  | 18.737 |      |
| 1.00108.67 |     |     |     |   |        |        |        | H    |
| ATOM       | 86  | N   | ASP | 8 | 15.439 | -0.689 | 17.978 | 1.00 |
| 27.00      |     |     | N   |   |        |        |        |      |
| ATOM       | 87  | CA  | ASP | 8 | 16.171 | -1.951 | 17.963 | 1.00 |
| 14.15      |     |     | C   |   |        |        |        |      |
| ATOM       | 88  | C   | ASP | 8 | 16.052 | -2.656 | 19.308 | 1.00 |
| 9.37       |     |     | C   |   |        |        |        |      |
| ATOM       | 89  | O   | ASP | 8 | 15.837 | -3.866 | 19.370 | 1.00 |
| 14.61      |     |     | O   |   |        |        |        |      |
| ATOM       | 90  | CB  | ASP | 8 | 17.646 | -1.698 | 17.648 | 1.00 |
| 15.06      |     |     | C   |   |        |        |        |      |
| ATOM       | 91  | CG  | ASP | 8 | 18.388 | -3.024 | 17.529 | 1.00 |
| 21.22      |     |     | C   |   |        |        |        |      |
| ATOM       | 92  | OD1 | ASP | 8 | 19.238 | -3.282 | 18.366 |      |
| 1.00119.56 |     |     |     |   |        |        |        | O    |
| ATOM       | 93  | OD2 | ASP | 8 | 18.097 | -3.764 | 16.604 |      |
| 1.00133.27 |     |     |     |   |        |        |        | O1-  |
| ATOM       | 94  | HN  | ASP | 8 | 15.921 | 0.150  | 17.831 | 1.00 |
| 35.63      |     |     | H   |   |        |        |        |      |
| ATOM       | 95  | HA  | ASP | 8 | 15.756 | -2.586 | 17.200 | 1.00 |
| 20.92      |     |     | H   |   |        |        |        |      |
| ATOM       | 96  | HB1 | ASP | 8 | 18.086 | -1.112 | 18.441 | 1.00 |
| 29.39      |     |     | H   |   |        |        |        |      |
| ATOM       | 97  | HB2 | ASP | 8 | 17.726 | -1.157 | 16.716 | 1.00 |
| 44.14      |     |     | H   |   |        |        |        |      |
| ATOM       | 98  | N   | CYS | 9 | 16.192 | -1.889 | 20.380 | 1.00 |
| 5.93       |     |     | N   |   |        |        |        |      |
| ATOM       | 99  | CA  | CYS | 9 | 16.097 | -2.446 | 21.724 | 1.00 |
| 7.54       |     |     | C   |   |        |        |        |      |
| ATOM       | 100 | C   | CYS | 9 | 14.711 | -3.034 | 21.956 | 1.00 |
| 14.60      |     |     | C   |   |        |        |        |      |
| ATOM       | 101 | O   | CYS | 9 | 14.564 | -4.108 | 22.538 | 1.00 |
| 25.78      |     |     | O   |   |        |        |        |      |
| ATOM       | 102 | CB  | CYS | 9 | 16.383 | -1.361 | 22.752 | 1.00 |
| 6.63       |     |     | C   |   |        |        |        |      |
| ATOM       | 103 | SG  | CYS | 9 | 18.134 | -0.953 | 22.669 | 1.00 |
| 10.91      |     |     | S   |   |        |        |        |      |
| ATOM       | 104 | HN  | CYS | 9 | 16.360 | -0.932 | 20.264 | 1.00 |
| 6.51       |     |     | H   |   |        |        |        |      |

|            |     |     |     |    |        |        |        |      |
|------------|-----|-----|-----|----|--------|--------|--------|------|
| ATOM       | 105 | HA  | CYS | 9  | 16.838 | -3.220 | 21.832 | 1.00 |
| 11.12      |     |     | H   |    |        |        |        |      |
| ATOM       | 106 | HB1 | CYS | 9  | 16.146 | -1.719 | 23.741 | 1.00 |
| 11.28      |     |     | H   |    |        |        |        |      |
| ATOM       | 107 | HB2 | CYS | 9  | 15.794 | -0.484 | 22.531 | 1.00 |
| 5.04       |     |     | H   |    |        |        |        |      |
| ATOM       | 108 | N   | ALA | 10 | 13.700 | -2.316 | 21.484 | 1.00 |
| 16.26      |     |     | N   |    |        |        |        |      |
| ATOM       | 109 | CA  | ALA | 10 | 12.317 | -2.755 | 21.623 | 1.00 |
| 32.04      |     |     | C   |    |        |        |        |      |
| ATOM       | 110 | C   | ALA | 10 | 11.401 | -1.864 | 20.785 | 1.00 |
| 45.47      |     |     | C   |    |        |        |        |      |
| ATOM       | 111 | O   | ALA | 10 | 11.811 | -0.797 | 20.332 |      |
| 1.00119.04 |     |     | O   |    |        |        |        |      |
| ATOM       | 112 | CB  | ALA | 10 | 11.892 | -2.712 | 23.094 | 1.00 |
| 30.10      |     |     | C   |    |        |        |        |      |
| ATOM       | 113 | HN  | ALA | 10 | 13.890 | -1.472 | 21.024 | 1.00 |
| 12.81      |     |     | H   |    |        |        |        |      |
| ATOM       | 114 | HA  | ALA | 10 | 12.237 | -3.771 | 21.265 | 1.00 |
| 47.14      |     |     | H   |    |        |        |        |      |
| ATOM       | 115 | HB1 | ALA | 10 | 12.723 | -3.012 | 23.717 | 1.00 |
| 84.37      |     |     | H   |    |        |        |        |      |
| ATOM       | 116 | HB2 | ALA | 10 | 11.064 | -3.388 | 23.252 |      |
| 1.00118.20 |     |     | H   |    |        |        |        |      |
| ATOM       | 117 | HB3 | ALA | 10 | 11.591 | -1.709 | 23.357 |      |
| 1.00117.32 |     |     | H   |    |        |        |        |      |
| ATOM       | 118 | N   | ALA | 11 | 10.166 | -2.306 | 20.580 | 1.00 |
| 30.62      |     |     | N   |    |        |        |        |      |
| ATOM       | 119 | CA  | ALA | 11 | 9.218  | -1.530 | 19.790 | 1.00 |
| 35.24      |     |     | C   |    |        |        |        |      |
| ATOM       | 120 | C   | ALA | 11 | 8.972  | -0.164 | 20.428 | 1.00 |
| 22.78      |     |     | C   |    |        |        |        |      |
| ATOM       | 121 | O   | ALA | 11 | 8.916  | 0.853  | 19.736 | 1.00 |
| 53.33      |     |     | O   |    |        |        |        |      |
| ATOM       | 122 | CB  | ALA | 11 | 7.892  | -2.286 | 19.677 | 1.00 |
| 60.49      |     |     | C   |    |        |        |        |      |
| ATOM       | 123 | HN  | ALA | 11 | 9.890  | -3.165 | 20.963 | 1.00 |
| 50.37      |     |     | H   |    |        |        |        |      |
| ATOM       | 124 | HA  | ALA | 11 | 9.621  | -1.386 | 18.800 | 1.00 |
| 41.70      |     |     | H   |    |        |        |        |      |
| ATOM       | 125 | HB1 | ALA | 11 | 7.586  | -2.626 | 20.656 |      |
| 1.00157.06 |     |     | H   |    |        |        |        |      |
| ATOM       | 126 | HB2 | ALA | 11 | 8.018  | -3.137 | 19.024 |      |
| 1.00148.83 |     |     | H   |    |        |        |        |      |
| ATOM       | 127 | HB3 | ALA | 11 | 7.136  | -1.629 | 19.271 |      |
| 1.00137.06 |     |     | H   |    |        |        |        |      |
| ATOM       | 128 | N   | ASP | 12 | 8.829  | -0.146 | 21.750 | 1.00 |
| 18.98      |     |     | N   |    |        |        |        |      |
| ATOM       | 129 | CA  | ASP | 12 | 8.590  | 1.102  | 22.470 | 1.00 |
| 31.05      |     |     | C   |    |        |        |        |      |
| ATOM       | 130 | C   | ASP | 12 | 9.896  | 1.863  | 22.693 | 1.00 |
| 22.98      |     |     | C   |    |        |        |        |      |

|            |     |     |     |     |        |        |        |      |
|------------|-----|-----|-----|-----|--------|--------|--------|------|
| ATOM       | 131 | O   | ASP | 12  | 9.914  | 3.094  | 22.700 | 1.00 |
| 37.14      |     | O   |     |     |        |        |        |      |
| ATOM       | 132 | CB  | ASP | 12  | 7.937  | 0.805  | 23.821 | 1.00 |
| 48.35      |     | C   |     |     |        |        |        |      |
| ATOM       | 133 | CG  | ASP | 12  | 6.515  | 0.295  | 23.613 |      |
| 1.00104.83 |     |     |     | C   |        |        |        |      |
| ATOM       | 134 | OD1 | ASP | 12  | 5.955  | -0.242 | 24.554 |      |
| 1.00258.73 |     |     |     | O   |        |        |        |      |
| ATOM       | 135 | OD2 | ASP | 12  | 6.008  | 0.450  | 22.514 |      |
| 1.00213.46 |     |     |     | O1- |        |        |        |      |
| ATOM       | 136 | HN  | ASP | 12  | 8.883  | -0.987 | 22.251 | 1.00 |
| 36.19      |     | H   |     |     |        |        |        |      |
| ATOM       | 137 | HA  | ASP | 12  | 7.920  | 1.719  | 21.891 | 1.00 |
| 49.76      |     | H   |     |     |        |        |        |      |
| ATOM       | 138 | HB1 | ASP | 12  | 7.910  | 1.708  | 24.412 | 1.00 |
| 95.71      |     | H   |     |     |        |        |        |      |
| ATOM       | 139 | HB2 | ASP | 12  | 8.514  | 0.053  | 24.341 | 1.00 |
| 54.37      |     | H   |     |     |        |        |        |      |
| ATOM       | 140 | N   | GLU | 13  | 10.982 | 1.121  | 22.882 | 1.00 |
| 17.60      |     | N   |     |     |        |        |        |      |
| ATOM       | 141 | CA  | GLU | 13  | 12.287 | 1.733  | 23.117 | 1.00 |
| 12.01      |     | C   |     |     |        |        |        |      |
| ATOM       | 142 | C   | GLU | 13  | 12.863 | 2.322  | 21.831 | 1.00 |
| 10.07      |     | C   |     |     |        |        |        |      |
| ATOM       | 143 | O   | GLU | 13  | 12.481 | 1.929  | 20.728 | 1.00 |
| 12.81      |     | O   |     |     |        |        |        |      |
| ATOM       | 144 | CB  | GLU | 13  | 13.252 | 0.694  | 23.683 | 1.00 |
| 11.74      |     | C   |     |     |        |        |        |      |
| ATOM       | 145 | CG  | GLU | 13  | 12.753 | 0.227  | 25.053 | 1.00 |
| 13.49      |     | C   |     |     |        |        |        |      |
| ATOM       | 146 | CD  | GLU | 13  | 12.899 | 1.351  | 26.072 |      |
| 1.00142.36 |     |     |     | C   |        |        |        |      |
| ATOM       | 147 | OE1 | GLU | 13  | 13.599 | 2.304  | 25.775 |      |
| 1.00339.06 |     |     |     | O   |        |        |        |      |
| ATOM       | 148 | OE2 | GLU | 13  | 12.308 | 1.243  | 27.133 |      |
| 1.00335.28 |     |     |     | O1- |        |        |        |      |
| ATOM       | 149 | HN  | GLU | 13  | 10.904 | 0.145  | 22.873 | 1.00 |
| 28.36      |     | H   |     |     |        |        |        |      |
| ATOM       | 150 | HA  | GLU | 13  | 12.172 | 2.526  | 23.841 | 1.00 |
| 13.06      |     | H   |     |     |        |        |        |      |
| ATOM       | 151 | HB1 | GLU | 13  | 14.231 | 1.133  | 23.790 | 1.00 |
| 13.76      |     | H   |     |     |        |        |        |      |
| ATOM       | 152 | HB2 | GLU | 13  | 13.308 | -0.150 | 23.011 | 1.00 |
| 9.94       |     | H   |     |     |        |        |        |      |
| ATOM       | 153 | HG1 | GLU | 13  | 13.330 | -0.626 | 25.375 | 1.00 |
| 66.02      |     | H   |     |     |        |        |        |      |
| ATOM       | 154 | HG2 | GLU | 13  | 11.711 | -0.051 | 24.979 | 1.00 |
| 56.23      |     | H   |     |     |        |        |        |      |
| ATOM       | 155 | N   | CYS | 14  | 13.788 | 3.274  | 21.986 | 1.00 |
| 9.12       |     | N   |     |     |        |        |        |      |
| ATOM       | 156 | CA  | CYS | 14  | 14.429 | 3.931  | 20.842 | 1.00 |
| 10.69      |     | C   |     |     |        |        |        |      |

|            |     |     |     |    |        |       |        |      |
|------------|-----|-----|-----|----|--------|-------|--------|------|
| ATOM       | 157 | C   | CYS | 14 | 15.874 | 3.467 | 20.697 | 1.00 |
| 9.56       |     | C   |     |    |        |       |        |      |
| ATOM       | 158 | O   | CYS | 14 | 16.503 | 3.057 | 21.670 | 1.00 |
| 13.62      |     | O   |     |    |        |       |        |      |
| ATOM       | 159 | CB  | CYS | 14 | 14.403 | 5.448 | 21.035 | 1.00 |
| 13.96      |     | C   |     |    |        |       |        |      |
| ATOM       | 160 | SG  | CYS | 14 | 15.364 | 6.239 | 19.719 | 1.00 |
| 42.96      |     | S   |     |    |        |       |        |      |
| ATOM       | 161 | HN  | CYS | 14 | 14.048 | 3.540 | 22.894 | 1.00 |
| 9.76       |     | H   |     |    |        |       |        |      |
| ATOM       | 162 | HA  | CYS | 14 | 13.890 | 3.688 | 19.936 | 1.00 |
| 15.54      |     | H   |     |    |        |       |        |      |
| ATOM       | 163 | HB1 | CYS | 14 | 14.832 | 5.696 | 21.994 | 1.00 |
| 50.72      |     | H   |     |    |        |       |        |      |
| ATOM       | 164 | HB2 | CYS | 14 | 13.382 | 5.799 | 20.996 | 1.00 |
| 46.13      |     | H   |     |    |        |       |        |      |
| ATOM       | 165 | N   | CYS | 15 | 16.397 | 3.540 | 19.473 | 1.00 |
| 9.60       |     | N   |     |    |        |       |        |      |
| ATOM       | 166 | CA  | CYS | 15 | 17.777 | 3.134 | 19.197 | 1.00 |
| 9.28       |     | C   |     |    |        |       |        |      |
| ATOM       | 167 | C   | CYS | 15 | 18.387 | 4.070 | 18.164 | 1.00 |
| 9.92       |     | C   |     |    |        |       |        |      |
| ATOM       | 168 | O   | CYS | 15 | 17.807 | 4.290 | 17.101 | 1.00 |
| 13.31      |     | O   |     |    |        |       |        |      |
| ATOM       | 169 | CB  | CYS | 15 | 17.805 | 1.700 | 18.658 | 1.00 |
| 12.90      |     | C   |     |    |        |       |        |      |
| ATOM       | 170 | SG  | CYS | 15 | 19.521 | 1.161 | 18.440 | 1.00 |
| 39.11      |     | S   |     |    |        |       |        |      |
| ATOM       | 171 | HN  | CYS | 15 | 15.847 | 3.883 | 18.737 | 1.00 |
| 13.12      |     | H   |     |    |        |       |        |      |
| ATOM       | 172 | HA  | CYS | 15 | 18.360 | 3.182 | 20.106 | 1.00 |
| 8.26       |     | H   |     |    |        |       |        |      |
| ATOM       | 173 | HB1 | CYS | 15 | 17.293 | 1.664 | 17.708 | 1.00 |
| 24.82      |     | H   |     |    |        |       |        |      |
| ATOM       | 174 | HB2 | CYS | 15 | 17.309 | 1.044 | 19.358 | 1.00 |
| 27.31      |     | H   |     |    |        |       |        |      |
| ATOM       | 175 | N   | VAL | 16 | 19.557 | 4.622 | 18.472 | 1.00 |
| 9.56       |     | N   |     |    |        |       |        |      |
| ATOM       | 176 | CA  | VAL | 16 | 20.219 | 5.531 | 17.544 | 1.00 |
| 11.99      |     | C   |     |    |        |       |        |      |
| ATOM       | 177 | C   | VAL | 16 | 21.726 | 5.460 | 17.736 | 1.00 |
| 7.73       |     | C   |     |    |        |       |        |      |
| ATOM       | 178 | O   | VAL | 16 | 22.225 | 5.581 | 18.855 | 1.00 |
| 8.83       |     | O   |     |    |        |       |        |      |
| ATOM       | 179 | CB  | VAL | 16 | 19.721 | 6.958 | 17.775 | 1.00 |
| 18.37      |     | C   |     |    |        |       |        |      |
| ATOM       | 180 | CG1 | VAL | 16 | 20.155 | 7.441 | 19.160 | 1.00 |
| 39.61      |     | C   |     |    |        |       |        |      |
| ATOM       | 181 | CG2 | VAL | 16 | 20.300 | 7.879 | 16.703 |      |
| 1.00115.21 |     |     |     |    |        |       |        |      |
| ATOM       | 182 | HN  | VAL | 16 | 19.987 | 4.415 | 19.334 | 1.00 |
| 9.76       |     | H   |     |    |        |       |        |      |

|            |     |      |     |    |        |       |        |      |
|------------|-----|------|-----|----|--------|-------|--------|------|
| ATOM       | 183 | HA   | VAL | 16 | 19.985 | 5.239 | 16.529 | 1.00 |
| 17.27      |     |      | H   |    |        |       |        |      |
| ATOM       | 184 | HB   | VAL | 16 | 18.641 | 6.973 | 17.716 | 1.00 |
| 52.63      |     |      | H   |    |        |       |        |      |
| ATOM       | 185 | HG11 | VAL | 16 | 19.591 | 8.323 | 19.427 |      |
| 1.00128.07 |     |      | H   |    |        |       |        |      |
| ATOM       | 186 | HG12 | VAL | 16 | 21.209 | 7.679 | 19.145 |      |
| 1.00154.13 |     |      | H   |    |        |       |        |      |
| ATOM       | 187 | HG13 | VAL | 16 | 19.971 | 6.663 | 19.886 |      |
| 1.00135.74 |     |      | H   |    |        |       |        |      |
| ATOM       | 188 | HG21 | VAL | 16 | 19.978 | 7.541 | 15.729 |      |
| 1.00229.05 |     |      | H   |    |        |       |        |      |
| ATOM       | 189 | HG22 | VAL | 16 | 21.378 | 7.858 | 16.754 |      |
| 1.00261.82 |     |      | H   |    |        |       |        |      |
| ATOM       | 190 | HG23 | VAL | 16 | 19.951 | 8.887 | 16.868 |      |
| 1.00210.07 |     |      | H   |    |        |       |        |      |
| ATOM       | 191 | N    | ASP | 17 | 22.448 | 5.247 | 16.637 | 1.00 |
| 14.34      |     |      | N   |    |        |       |        |      |
| ATOM       | 192 | CA   | ASP | 17 | 23.907 | 5.142 | 16.692 | 1.00 |
| 11.90      |     |      | C   |    |        |       |        |      |
| ATOM       | 193 | C    | ASP | 17 | 24.575 | 6.370 | 16.090 | 1.00 |
| 13.15      |     |      | C   |    |        |       |        |      |
| ATOM       | 194 | O    | ASP | 17 | 24.428 | 6.656 | 14.902 | 1.00 |
| 25.96      |     |      | O   |    |        |       |        |      |
| ATOM       | 195 | CB   | ASP | 17 | 24.362 | 3.892 | 15.941 | 1.00 |
| 20.80      |     |      | C   |    |        |       |        |      |
| ATOM       | 196 | CG   | ASP | 17 | 23.758 | 2.651 | 16.593 | 1.00 |
| 28.72      |     |      | C   |    |        |       |        |      |
| ATOM       | 197 | OD1  | ASP | 17 | 23.229 | 1.823 | 15.872 |      |
| 1.00135.42 |     |      | O   |    |        |       |        |      |
| ATOM       | 198 | OD2  | ASP | 17 | 23.835 | 2.549 | 17.806 |      |
| 1.00114.17 |     |      | O1- |    |        |       |        |      |
| ATOM       | 199 | HN   | ASP | 17 | 21.993 | 5.147 | 15.775 | 1.00 |
| 28.29      |     |      | H   |    |        |       |        |      |
| ATOM       | 200 | HA   | ASP | 17 | 24.220 | 5.053 | 17.719 | 1.00 |
| 10.49      |     |      | H   |    |        |       |        |      |
| ATOM       | 201 | HB1  | ASP | 17 | 25.439 | 3.826 | 15.978 | 1.00 |
| 22.42      |     |      | H   |    |        |       |        |      |
| ATOM       | 202 | HB2  | ASP | 17 | 24.040 | 3.952 | 14.912 | 1.00 |
| 29.52      |     |      | H   |    |        |       |        |      |
| ATOM       | 203 | N    | THR | 18 | 25.333 | 7.077 | 16.926 | 1.00 |
| 11.55      |     |      | N   |    |        |       |        |      |
| ATOM       | 204 | CA   | THR | 18 | 26.060 | 8.267 | 16.491 | 1.00 |
| 17.10      |     |      | C   |    |        |       |        |      |
| ATOM       | 205 | C    | THR | 18 | 27.530 | 7.923 | 16.306 | 1.00 |
| 10.63      |     |      | C   |    |        |       |        |      |
| ATOM       | 206 | O    | THR | 18 | 27.988 | 6.876 | 16.761 | 1.00 |
| 6.49       |     |      | O   |    |        |       |        |      |
| ATOM       | 207 | CB   | THR | 18 | 25.925 | 9.381 | 17.533 | 1.00 |
| 28.52      |     |      | C   |    |        |       |        |      |
| ATOM       | 208 | CG2  | THR | 18 | 24.511 | 9.955 | 17.496 | 1.00 |
| 45.38      |     |      | C   |    |        |       |        |      |



|            |     |      |     |    |        |        |        |      |
|------------|-----|------|-----|----|--------|--------|--------|------|
| ATOM       | 209 | OG1  | THR | 18 | 26.197 | 8.858  | 18.823 | 1.00 |
| 26.49      |     |      | O   |    |        |        |        |      |
| ATOM       | 210 | HN   | THR | 18 | 25.418 | 6.781  | 17.856 | 1.00 |
| 13.96      |     |      | H   |    |        |        |        |      |
| ATOM       | 211 | HA   | THR | 18 | 25.658 | 8.617  | 15.550 | 1.00 |
| 26.43      |     |      | H   |    |        |        |        |      |
| ATOM       | 212 | HB   | THR | 18 | 26.630 | 10.166 | 17.309 | 1.00 |
| 37.43      |     |      | H   |    |        |        |        |      |
| ATOM       | 213 | HG1  | THR | 18 | 25.702 | 8.040  | 18.921 | 1.00 |
| 71.62      |     |      | H   |    |        |        |        |      |
| ATOM       | 214 | HG21 | THR | 18 | 24.276 | 10.266 | 16.489 |      |
| 1.00100.44 |     |      |     |    |        |        |        | H    |
| ATOM       | 215 | HG22 | THR | 18 | 24.452 | 10.806 | 18.158 |      |
| 1.00129.42 |     |      |     |    |        |        |        | H    |
| ATOM       | 216 | HG23 | THR | 18 | 23.807 | 9.200  | 17.814 |      |
| 1.00156.21 |     |      |     |    |        |        |        | H    |
| ATOM       | 217 | N    | VAL | 19 | 28.264 | 8.814  | 15.653 | 1.00 |
| 16.32      |     |      | N   |    |        |        |        |      |
| ATOM       | 218 | CA   | VAL | 19 | 29.672 | 8.610  | 15.422 | 1.00 |
| 13.34      |     |      | C   |    |        |        |        |      |
| ATOM       | 219 | C    | VAL | 19 | 30.236 | 9.792  | 14.667 | 1.00 |
| 25.88      |     |      | C   |    |        |        |        |      |
| ATOM       | 220 | O    | VAL | 19 | 29.846 | 10.089 | 13.538 | 1.00 |
| 42.11      |     |      | O   |    |        |        |        |      |
| ATOM       | 221 | CB   | VAL | 19 | 29.941 | 7.326  | 14.637 | 1.00 |
| 15.48      |     |      | C   |    |        |        |        |      |
| ATOM       | 222 | CG1  | VAL | 19 | 29.094 | 7.297  | 13.360 | 1.00 |
| 29.06      |     |      | C   |    |        |        |        |      |
| ATOM       | 223 | CG2  | VAL | 19 | 31.431 | 7.276  | 14.270 | 1.00 |
| 20.67      |     |      | C   |    |        |        |        |      |
| ATOM       | 224 | HN   | VAL | 19 | 27.856 | 9.638  | 15.332 | 1.00 |
| 26.89      |     |      | H   |    |        |        |        |      |
| ATOM       | 225 | HA   | VAL | 19 | 30.170 | 8.540  | 16.378 | 1.00 |
| 8.08       |     |      | H   |    |        |        |        |      |
| ATOM       | 226 | HB   | VAL | 19 | 29.695 | 6.478  | 15.252 | 1.00 |
| 11.49      |     |      | H   |    |        |        |        |      |
| ATOM       | 227 | HG11 | VAL | 19 | 29.529 | 7.953  | 12.621 |      |
| 1.00137.43 |     |      |     |    |        |        |        | H    |
| ATOM       | 228 | HG12 | VAL | 19 | 28.089 | 7.625  | 13.584 | 1.00 |
| 93.29      |     |      | H   |    |        |        |        |      |
| ATOM       | 229 | HG13 | VAL | 19 | 29.063 | 6.289  | 12.973 |      |
| 1.00108.69 |     |      |     |    |        |        |        | H    |
| ATOM       | 230 | HG21 | VAL | 19 | 32.024 | 7.577  | 15.125 | 1.00 |
| 99.42      |     |      | H   |    |        |        |        |      |
| ATOM       | 231 | HG22 | VAL | 19 | 31.621 | 7.956  | 13.451 |      |
| 1.00111.36 |     |      |     |    |        |        |        | H    |
| ATOM       | 232 | HG23 | VAL | 19 | 31.700 | 6.273  | 13.977 | 1.00 |
| 77.11      |     |      | H   |    |        |        |        |      |
| ATOM       | 233 | N    | PHE | 20 | 31.150 | 10.459 | 15.322 | 1.00 |
| 24.58      |     |      | N   |    |        |        |        |      |
| ATOM       | 234 | CA   | PHE | 20 | 31.806 | 11.629 | 14.769 | 1.00 |
| 40.34      |     |      | C   |    |        |        |        |      |

|            |     |     |     |    |        |        |        |      |
|------------|-----|-----|-----|----|--------|--------|--------|------|
| ATOM       | 235 | C   | PHE | 20 | 33.134 | 11.251 | 14.127 | 1.00 |
| 40.37      |     |     | C   |    |        |        |        |      |
| ATOM       | 236 | O   | PHE | 20 | 33.328 | 11.452 | 12.928 | 1.00 |
| 66.02      |     |     | O   |    |        |        |        |      |
| ATOM       | 237 | CB  | PHE | 20 | 32.027 | 12.669 | 15.884 | 1.00 |
| 48.79      |     |     | C   |    |        |        |        |      |
| ATOM       | 238 | CG  | PHE | 20 | 32.191 | 11.996 | 17.240 | 1.00 |
| 35.75      |     |     | C   |    |        |        |        |      |
| ATOM       | 239 | CD1 | PHE | 20 | 31.115 | 11.308 | 17.837 | 1.00 |
| 30.20      |     |     | C   |    |        |        |        |      |
| ATOM       | 240 | CD2 | PHE | 20 | 33.416 | 12.081 | 17.915 | 1.00 |
| 40.95      |     |     | C   |    |        |        |        |      |
| ATOM       | 241 | CE1 | PHE | 20 | 31.277 | 10.709 | 19.090 | 1.00 |
| 30.41      |     |     | C   |    |        |        |        |      |
| ATOM       | 242 | CE2 | PHE | 20 | 33.573 | 11.478 | 19.168 | 1.00 |
| 45.84      |     |     | C   |    |        |        |        |      |
| ATOM       | 243 | CZ  | PHE | 20 | 32.505 | 10.794 | 19.755 | 1.00 |
| 40.81      |     |     | C   |    |        |        |        |      |
| ATOM       | 244 | HN  | PHE | 20 | 31.382 | 10.156 | 16.215 | 1.00 |
| 16.73      |     |     | H   |    |        |        |        |      |
| ATOM       | 245 | HA  | PHE | 20 | 31.171 | 12.067 | 14.008 | 1.00 |
| 59.91      |     |     | H   |    |        |        |        |      |
| ATOM       | 246 | HB1 | PHE | 20 | 31.181 | 13.315 | 15.920 | 1.00 |
| 67.15      |     |     | H   |    |        |        |        |      |
| ATOM       | 247 | HB2 | PHE | 20 | 32.906 | 13.261 | 15.667 | 1.00 |
| 58.17      |     |     | H   |    |        |        |        |      |
| ATOM       | 248 | HD1 | PHE | 20 | 30.162 | 11.231 | 17.328 | 1.00 |
| 33.34      |     |     | H   |    |        |        |        |      |
| ATOM       | 249 | HD2 | PHE | 20 | 34.243 | 12.608 | 17.465 | 1.00 |
| 49.35      |     |     | H   |    |        |        |        |      |
| ATOM       | 250 | HE1 | PHE | 20 | 30.454 | 10.183 | 19.545 | 1.00 |
| 30.61      |     |     | H   |    |        |        |        |      |
| ATOM       | 251 | HE2 | PHE | 20 | 34.521 | 11.543 | 19.682 | 1.00 |
| 61.27      |     |     | H   |    |        |        |        |      |
| ATOM       | 252 | HZ  | PHE | 20 | 32.628 | 10.330 | 20.723 | 1.00 |
| 52.66      |     |     | H   |    |        |        |        |      |
| ATOM       | 253 | N   | GLU | 21 | 34.056 | 10.732 | 14.932 | 1.00 |
| 41.31      |     |     | N   |    |        |        |        |      |
| ATOM       | 254 | CA  | GLU | 21 | 35.368 | 10.366 | 14.450 | 1.00 |
| 56.16      |     |     | C   |    |        |        |        |      |
| ATOM       | 255 | C   | GLU | 21 | 35.592 | 8.862  | 14.544 | 1.00 |
| 58.61      |     |     | C   |    |        |        |        |      |
| ATOM       | 256 | O   | GLU | 21 | 34.670 | 8.099  | 14.838 |      |
| 1.00201.19 |     |     | O   |    |        |        |        |      |
| ATOM       | 257 | CB  | GLU | 21 | 36.371 | 11.102 | 15.308 | 1.00 |
| 57.37      |     |     | C   |    |        |        |        |      |
| ATOM       | 258 | CG  | GLU | 21 | 36.298 | 10.579 | 16.739 |      |
| 1.00193.56 |     |     | C   |    |        |        |        |      |
| ATOM       | 259 | CD  | GLU | 21 | 37.080 | 11.500 | 17.670 |      |
| 1.00304.62 |     |     | C   |    |        |        |        |      |
| ATOM       | 260 | OE1 | GLU | 21 | 37.019 | 11.289 | 18.869 |      |
| 1.00451.81 |     |     | O   |    |        |        |        |      |

|            |     |     |     |     |        |        |        |      |
|------------|-----|-----|-----|-----|--------|--------|--------|------|
| ATOM       | 261 | OE2 | GLU | 21  | 37.728 | 12.404 | 17.168 |      |
| 1.00442.88 |     |     |     | O1- |        |        |        |      |
| ATOM       | 262 | HN  | GLU | 21  | 33.868 | 10.620 | 15.883 | 1.00 |
| 50.82      |     |     | H   |     |        |        |        |      |
| ATOM       | 263 | HA  | GLU | 21  | 35.492 | 10.679 | 13.422 | 1.00 |
| 85.72      |     |     | H   |     |        |        |        |      |
| ATOM       | 264 | HB1 | GLU | 21  | 36.126 | 12.153 | 15.301 | 1.00 |
| 46.37      |     |     | H   |     |        |        |        |      |
| ATOM       | 265 | HB2 | GLU | 21  | 37.354 | 10.952 | 14.915 |      |
| 1.00131.81 |     |     | H   |     |        |        |        |      |
| ATOM       | 266 | HG1 | GLU | 21  | 36.717 | 9.590  | 16.775 |      |
| 1.00314.91 |     |     | H   |     |        |        |        |      |
| ATOM       | 267 | HG2 | GLU | 21  | 35.270 | 10.537 | 17.052 |      |
| 1.00266.92 |     |     | H   |     |        |        |        |      |
| ATOM       | 268 | N   | GLY | 22  | 36.825 | 8.444  | 14.277 | 1.00 |
| 86.70      |     |     | N   |     |        |        |        |      |
| ATOM       | 269 | CA  | GLY | 22  | 37.181 | 7.023  | 14.314 |      |
| 1.00104.66 |     |     | C   |     |        |        |        |      |
| ATOM       | 270 | C   | GLY | 22  | 37.774 | 6.620  | 15.663 | 1.00 |
| 71.50      |     |     | C   |     |        |        |        |      |
| ATOM       | 271 | O   | GLY | 22  | 37.923 | 5.433  | 15.953 | 1.00 |
| 89.87      |     |     | O   |     |        |        |        |      |
| ATOM       | 272 | HN  | GLY | 22  | 37.508 | 9.109  | 14.043 |      |
| 1.00214.64 |     |     | H   |     |        |        |        |      |
| ATOM       | 273 | HA1 | GLY | 22  | 37.908 | 6.825  | 13.542 |      |
| 1.00152.47 |     |     | H   |     |        |        |        |      |
| ATOM       | 274 | HA2 | GLY | 22  | 36.299 | 6.425  | 14.126 |      |
| 1.00118.15 |     |     | H   |     |        |        |        |      |
| ATOM       | 275 | N   | ASP | 23  | 38.122 | 7.609  | 16.479 | 1.00 |
| 44.68      |     |     | N   |     |        |        |        |      |
| ATOM       | 276 | CA  | ASP | 23  | 38.711 | 7.334  | 17.787 | 1.00 |
| 43.33      |     |     | C   |     |        |        |        |      |
| ATOM       | 277 | C   | ASP | 23  | 37.750 | 6.544  | 18.669 | 1.00 |
| 37.55      |     |     | C   |     |        |        |        |      |
| ATOM       | 278 | O   | ASP | 23  | 38.162 | 5.633  | 19.388 | 1.00 |
| 61.37      |     |     | O   |     |        |        |        |      |
| ATOM       | 279 | CB  | ASP | 23  | 39.072 | 8.645  | 18.486 | 1.00 |
| 40.74      |     |     | C   |     |        |        |        |      |
| ATOM       | 280 | CG  | ASP | 23  | 40.258 | 9.301  | 17.786 |      |
| 1.00141.86 |     |     | C   |     |        |        |        |      |
| ATOM       | 281 | OD1 | ASP | 23  | 40.507 | 10.465 | 18.053 |      |
| 1.00328.18 |     |     | O   |     |        |        |        |      |
| ATOM       | 282 | OD2 | ASP | 23  | 40.898 | 8.631  | 16.994 |      |
| 1.00304.58 |     |     | O1- |     |        |        |        |      |
| ATOM       | 283 | HN  | ASP | 23  | 37.993 | 8.536  | 16.193 | 1.00 |
| 40.86      |     |     | H   |     |        |        |        |      |
| ATOM       | 284 | HA  | ASP | 23  | 39.609 | 6.758  | 17.649 | 1.00 |
| 72.12      |     |     | H   |     |        |        |        |      |
| ATOM       | 285 | HB1 | ASP | 23  | 39.332 | 8.443  | 19.513 | 1.00 |
| 94.15      |     |     | H   |     |        |        |        |      |
| ATOM       | 286 | HB2 | ASP | 23  | 38.222 | 9.311  | 18.459 | 1.00 |
| 93.26      |     |     | H   |     |        |        |        |      |

|            |     |     |     |    |        |       |        |      |
|------------|-----|-----|-----|----|--------|-------|--------|------|
| ATOM       | 287 | N   | MET | 24 | 36.474 | 6.903 | 18.619 | 1.00 |
| 23.24      |     |     | N   |    |        |       |        |      |
| ATOM       | 288 | CA  | MET | 24 | 35.466 | 6.225 | 19.431 | 1.00 |
| 32.50      |     |     | C   |    |        |       |        |      |
| ATOM       | 289 | C   | MET | 24 | 34.075 | 6.392 | 18.824 | 1.00 |
| 25.13      |     |     | C   |    |        |       |        |      |
| ATOM       | 290 | O   | MET | 24 | 33.805 | 7.370 | 18.125 | 1.00 |
| 54.40      |     |     | O   |    |        |       |        |      |
| ATOM       | 291 | CB  | MET | 24 | 35.477 | 6.791 | 20.853 | 1.00 |
| 47.36      |     |     | C   |    |        |       |        |      |
| ATOM       | 292 | CG  | MET | 24 | 34.443 | 6.054 | 21.707 |      |
| 1.00151.73 |     |     | C   |    |        |       |        |      |
| ATOM       | 293 | SD  | MET | 24 | 34.603 | 6.576 | 23.434 |      |
| 1.00209.23 |     |     | S   |    |        |       |        |      |
| ATOM       | 294 | CE  | MET | 24 | 33.987 | 8.268 | 23.234 |      |
| 1.00243.29 |     |     | C   |    |        |       |        |      |
| ATOM       | 295 | HN  | MET | 24 | 36.207 | 7.641 | 18.033 | 1.00 |
| 17.32      |     |     | H   |    |        |       |        |      |
| ATOM       | 296 | HA  | MET | 24 | 35.700 | 5.171 | 19.476 | 1.00 |
| 48.94      |     |     | H   |    |        |       |        |      |
| ATOM       | 297 | HB1 | MET | 24 | 35.233 | 7.842 | 20.822 |      |
| 1.00124.40 |     |     | H   |    |        |       |        |      |
| ATOM       | 298 | HB2 | MET | 24 | 36.460 | 6.662 | 21.283 |      |
| 1.00166.96 |     |     | H   |    |        |       |        |      |
| ATOM       | 299 | HG1 | MET | 24 | 34.612 | 4.990 | 21.637 |      |
| 1.00331.71 |     |     | H   |    |        |       |        |      |
| ATOM       | 300 | HG2 | MET | 24 | 33.450 | 6.284 | 21.351 |      |
| 1.00302.30 |     |     | H   |    |        |       |        |      |
| ATOM       | 301 | HE1 | MET | 24 | 33.643 | 8.639 | 24.189 |      |
| 1.00340.44 |     |     | H   |    |        |       |        |      |
| ATOM       | 302 | HE2 | MET | 24 | 33.168 | 8.276 | 22.533 |      |
| 1.00373.88 |     |     | H   |    |        |       |        |      |
| ATOM       | 303 | HE3 | MET | 24 | 34.783 | 8.899 | 22.863 |      |
| 1.00386.81 |     |     | H   |    |        |       |        |      |
| ATOM       | 304 | N   | VAL | 25 | 33.195 | 5.427 | 19.098 | 1.00 |
| 22.44      |     |     | N   |    |        |       |        |      |
| ATOM       | 305 | CA  | VAL | 25 | 31.823 | 5.458 | 18.583 | 1.00 |
| 15.37      |     |     | C   |    |        |       |        |      |
| ATOM       | 306 | C   | VAL | 25 | 30.821 | 5.579 | 19.727 | 1.00 |
| 17.47      |     |     | C   |    |        |       |        |      |
| ATOM       | 307 | O   | VAL | 25 | 30.993 | 4.983 | 20.790 | 1.00 |
| 29.52      |     |     | O   |    |        |       |        |      |
| ATOM       | 308 | CB  | VAL | 25 | 31.530 | 4.190 | 17.777 | 1.00 |
| 23.36      |     |     | C   |    |        |       |        |      |
| ATOM       | 309 | CG1 | VAL | 25 | 30.045 | 4.165 | 17.371 | 1.00 |
| 58.39      |     |     | C   |    |        |       |        |      |
| ATOM       | 310 | CG2 | VAL | 25 | 32.410 | 4.179 | 16.523 | 1.00 |
| 55.25      |     |     | C   |    |        |       |        |      |
| ATOM       | 311 | HN  | VAL | 25 | 33.474 | 4.676 | 19.662 | 1.00 |
| 48.11      |     |     | H   |    |        |       |        |      |
| ATOM       | 312 | HA  | VAL | 25 | 31.702 | 6.317 | 17.931 | 1.00 |
| 9.25       |     |     | H   |    |        |       |        |      |

|            |     |      |     |    |        |       |        |      |
|------------|-----|------|-----|----|--------|-------|--------|------|
| ATOM       | 313 | HB   | VAL | 25 | 31.751 | 3.322 | 18.382 | 1.00 |
| 52.45      |     |      | H   |    |        |       |        |      |
| ATOM       | 314 | HG11 | VAL | 25 | 29.459 | 3.768 | 18.186 |      |
| 1.00171.07 |     |      | H   |    |        |       |        |      |
| ATOM       | 315 | HG12 | VAL | 25 | 29.915 | 3.542 | 16.499 |      |
| 1.00166.22 |     |      | H   |    |        |       |        |      |
| ATOM       | 316 | HG13 | VAL | 25 | 29.712 | 5.170 | 17.149 |      |
| 1.00134.76 |     |      | H   |    |        |       |        |      |
| ATOM       | 317 | HG21 | VAL | 25 | 33.446 | 4.074 | 16.811 |      |
| 1.00141.88 |     |      | H   |    |        |       |        |      |
| ATOM       | 318 | HG22 | VAL | 25 | 32.278 | 5.104 | 15.983 |      |
| 1.00184.50 |     |      | H   |    |        |       |        |      |
| ATOM       | 319 | HG23 | VAL | 25 | 32.126 | 3.349 | 15.891 |      |
| 1.00133.90 |     |      | H   |    |        |       |        |      |
| ATOM       | 320 | N    | THR | 26 | 29.778 | 6.372 | 19.494 | 1.00 |
| 13.60      |     |      | N   |    |        |       |        |      |
| ATOM       | 321 | CA   | THR | 26 | 28.735 | 6.607 | 20.494 | 1.00 |
| 21.19      |     |      | C   |    |        |       |        |      |
| ATOM       | 322 | C    | THR | 26 | 27.410 | 5.965 | 20.079 | 1.00 |
| 16.55      |     |      | C   |    |        |       |        |      |
| ATOM       | 323 | O    | THR | 26 | 26.958 | 6.126 | 18.946 | 1.00 |
| 11.43      |     |      | O   |    |        |       |        |      |
| ATOM       | 324 | CB   | THR | 26 | 28.545 | 8.114 | 20.651 | 1.00 |
| 27.07      |     |      | C   |    |        |       |        |      |
| ATOM       | 325 | CG2  | THR | 26 | 27.365 | 8.402 | 21.581 | 1.00 |
| 44.39      |     |      | C   |    |        |       |        |      |
| ATOM       | 326 | OG1  | THR | 26 | 29.730 | 8.681 | 21.191 | 1.00 |
| 34.75      |     |      | O   |    |        |       |        |      |
| ATOM       | 327 | HN   | THR | 26 | 29.711 | 6.823 | 18.626 | 1.00 |
| 10.81      |     |      | H   |    |        |       |        |      |
| ATOM       | 328 | HA   | THR | 26 | 29.042 | 6.197 | 21.446 | 1.00 |
| 33.16      |     |      | H   |    |        |       |        |      |
| ATOM       | 329 | HB   | THR | 26 | 28.351 | 8.547 | 19.678 | 1.00 |
| 20.60      |     |      | H   |    |        |       |        |      |
| ATOM       | 330 | HG1  | THR | 26 | 30.262 | 7.968 | 21.551 | 1.00 |
| 77.72      |     |      | H   |    |        |       |        |      |
| ATOM       | 331 | HG21 | THR | 26 | 27.442 | 7.783 | 22.463 |      |
| 1.00126.99 |     |      | H   |    |        |       |        |      |
| ATOM       | 332 | HG22 | THR | 26 | 26.439 | 8.183 | 21.069 |      |
| 1.00108.32 |     |      | H   |    |        |       |        |      |
| ATOM       | 333 | HG23 | THR | 26 | 27.379 | 9.443 | 21.870 |      |
| 1.00151.99 |     |      | H   |    |        |       |        |      |
| ATOM       | 334 | N    | ARG | 27 | 26.789 | 5.242 | 21.016 | 1.00 |
| 22.38      |     |      | N   |    |        |       |        |      |
| ATOM       | 335 | CA   | ARG | 27 | 25.504 | 4.580 | 20.762 | 1.00 |
| 20.21      |     |      | C   |    |        |       |        |      |
| ATOM       | 336 | C    | ARG | 27 | 24.543 | 4.832 | 21.922 | 1.00 |
| 16.96      |     |      | C   |    |        |       |        |      |
| ATOM       | 337 | O    | ARG | 27 | 24.973 | 4.964 | 23.068 | 1.00 |
| 20.06      |     |      | O   |    |        |       |        |      |
| ATOM       | 338 | CB   | ARG | 27 | 25.717 | 3.074 | 20.594 | 1.00 |
| 22.14      |     |      | C   |    |        |       |        |      |

|      |            |      |     |    |        |        |        |      |
|------|------------|------|-----|----|--------|--------|--------|------|
| ATOM | 339        | CG   | ARG | 27 | 26.631 | 2.814  | 19.394 |      |
|      | 1.00124.30 |      |     |    |        |        |        | C    |
| ATOM | 340        | CD   | ARG | 27 | 27.013 | 1.333  | 19.355 |      |
|      | 1.00109.38 |      |     |    |        |        |        | C    |
| ATOM | 341        | NE   | ARG | 27 | 27.805 | 0.985  | 20.527 |      |
|      | 1.00227.73 |      |     |    |        |        |        | N    |
| ATOM | 342        | CZ   | ARG | 27 | 28.179 | -0.270 | 20.755 |      |
|      | 1.00426.12 |      |     |    |        |        |        | C    |
| ATOM | 343        | NH1  | ARG | 27 | 28.885 | -0.559 | 21.813 |      |
|      | 1.00767.09 |      |     |    |        |        |        | N1+  |
| ATOM | 344        | NH2  | ARG | 27 | 27.839 | -1.213 | 19.919 |      |
|      | 1.00581.78 |      |     |    |        |        |        | N    |
| ATOM | 345        | HN   | ARG | 27 | 27.199 | 5.159  | 21.903 | 1.00 |
|      | 30.75      |      |     |    |        |        |        | H    |
| ATOM | 346        | HA   | ARG | 27 | 25.067 | 4.975  | 19.858 | 1.00 |
|      | 23.13      |      |     |    |        |        |        | H    |
| ATOM | 347        | HB1  | ARG | 27 | 24.765 | 2.592  | 20.428 | 1.00 |
|      | 87.46      |      |     |    |        |        |        | H    |
| ATOM | 348        | HB2  | ARG | 27 | 26.172 | 2.672  | 21.488 |      |
|      | 1.00103.36 |      |     |    |        |        |        | H    |
| ATOM | 349        | HG1  | ARG | 27 | 27.525 | 3.411  | 19.486 |      |
|      | 1.00281.97 |      |     |    |        |        |        | H    |
| ATOM | 350        | HG2  | ARG | 27 | 26.114 | 3.077  | 18.483 |      |
|      | 1.00276.19 |      |     |    |        |        |        | H    |
| ATOM | 351        | HD1  | ARG | 27 | 27.587 | 1.137  | 18.461 |      |
|      | 1.00183.60 |      |     |    |        |        |        | H    |
| ATOM | 352        | HD2  | ARG | 27 | 26.116 | 0.733  | 19.340 |      |
|      | 1.00142.93 |      |     |    |        |        |        | H    |
| ATOM | 353        | HE   | ARG | 27 | 28.065 | 1.687  | 21.160 |      |
|      | 1.00372.53 |      |     |    |        |        |        | H    |
| ATOM | 354        | HH11 | ARG | 27 | 29.145 | 0.165  | 22.453 |      |
|      | 1.00910.59 |      |     |    |        |        |        | H    |
| ATOM | 355        | HH12 | ARG | 27 | 29.167 | -1.502 | 21.985 |      |
|      | 1.00999.99 |      |     |    |        |        |        | H    |
| ATOM | 356        | HH21 | ARG | 27 | 27.298 | -0.991 | 19.108 |      |
|      | 1.00532.54 |      |     |    |        |        |        | H    |
| ATOM | 357        | HH22 | ARG | 27 | 28.120 | -2.157 | 20.090 |      |
|      | 1.00948.84 |      |     |    |        |        |        | H    |
| ATOM | 358        | N    | SER | 28 | 23.238 | 4.900  | 21.628 | 1.00 |
|      | 14.60      |      |     |    |        |        |        | N    |
| ATOM | 359        | CA   | SER | 28 | 22.239 | 5.140  | 22.673 | 1.00 |
|      | 14.92      |      |     |    |        |        |        | C    |
| ATOM | 360        | C    | SER | 28 | 21.016 | 4.255  | 22.465 | 1.00 |
|      | 12.12      |      |     |    |        |        |        | C    |
| ATOM | 361        | O    | SER | 28 | 20.648 | 3.940  | 21.333 | 1.00 |
|      | 13.41      |      |     |    |        |        |        | O    |
| ATOM | 362        | CB   | SER | 28 | 21.817 | 6.610  | 22.661 | 1.00 |
|      | 23.26      |      |     |    |        |        |        | C    |
| ATOM | 363        | OG   | SER | 28 | 22.945 | 7.425  | 22.954 |      |
|      | 1.00146.32 |      |     |    |        |        |        | O    |
| ATOM | 364        | HN   | SER | 28 | 22.941 | 4.788  | 20.696 | 1.00 |
|      | 15.23      |      |     |    |        |        |        | H    |

|            |     |     |     |    |        |       |        |      |
|------------|-----|-----|-----|----|--------|-------|--------|------|
| ATOM       | 365 | HA  | SER | 28 | 22.668 | 4.912 | 23.640 | 1.00 |
| 15.44      |     |     | H   |    |        |       |        |      |
| ATOM       | 366 | HB1 | SER | 28 | 21.044 | 6.767 | 23.401 | 1.00 |
| 88.73      |     |     | H   |    |        |       |        |      |
| ATOM       | 367 | HB2 | SER | 28 | 21.438 | 6.870 | 21.688 |      |
| 1.00124.68 |     |     |     |    |        |       |        | H    |
| ATOM       | 368 | HG  | SER | 28 | 23.093 | 7.396 | 23.902 |      |
| 1.00242.47 |     |     |     |    |        |       |        | H    |
| ATOM       | 369 | N   | CYS | 29 | 20.387 | 3.862 | 23.568 | 1.00 |
| 10.48      |     |     | N   |    |        |       |        |      |
| ATOM       | 370 | CA  | CYS | 29 | 19.200 | 3.019 | 23.505 | 1.00 |
| 9.97       |     |     | C   |    |        |       |        |      |
| ATOM       | 371 | C   | CYS | 29 | 18.592 | 2.872 | 24.898 | 1.00 |
| 11.60      |     |     | C   |    |        |       |        |      |
| ATOM       | 372 | O   | CYS | 29 | 19.215 | 2.311 | 25.799 | 1.00 |
| 15.64      |     |     | O   |    |        |       |        |      |
| ATOM       | 373 | CB  | CYS | 29 | 19.563 | 1.637 | 22.934 | 1.00 |
| 9.52       |     |     | C   |    |        |       |        |      |
| ATOM       | 374 | SG  | CYS | 29 | 18.154 | 0.958 | 22.043 | 1.00 |
| 10.40      |     |     | S   |    |        |       |        |      |
| ATOM       | 375 | HN  | CYS | 29 | 20.724 | 4.152 | 24.441 | 1.00 |
| 11.10      |     |     | H   |    |        |       |        |      |
| ATOM       | 376 | HA  | CYS | 29 | 18.477 | 3.488 | 22.856 | 1.00 |
| 11.08      |     |     | H   |    |        |       |        |      |
| ATOM       | 377 | HB1 | CYS | 29 | 19.824 | 0.956 | 23.736 | 1.00 |
| 9.33       |     |     | H   |    |        |       |        |      |
| ATOM       | 378 | HB2 | CYS | 29 | 20.397 | 1.729 | 22.259 | 1.00 |
| 10.78      |     |     | H   |    |        |       |        |      |
| ATOM       | 379 | N   | GLU | 30 | 17.376 | 3.381 | 25.071 | 1.00 |
| 13.52      |     |     | N   |    |        |       |        |      |
| ATOM       | 380 | CA  | GLU | 30 | 16.705 | 3.300 | 26.365 | 1.00 |
| 17.41      |     |     | C   |    |        |       |        |      |
| ATOM       | 381 | C   | GLU | 30 | 16.074 | 1.925 | 26.558 | 1.00 |
| 10.81      |     |     | C   |    |        |       |        |      |
| ATOM       | 382 | O   | GLU | 30 | 15.721 | 1.252 | 25.592 | 1.00 |
| 23.22      |     |     | O   |    |        |       |        |      |
| ATOM       | 383 | CB  | GLU | 30 | 15.627 | 4.380 | 26.462 | 1.00 |
| 37.83      |     |     | C   |    |        |       |        |      |
| ATOM       | 384 | CG  | GLU | 30 | 16.278 | 5.760 | 26.339 |      |
| 1.00108.13 |     |     |     |    |        |       |        | C    |
| ATOM       | 385 | CD  | GLU | 30 | 17.167 | 6.027 | 27.548 |      |
| 1.00240.52 |     |     |     |    |        |       |        | C    |
| ATOM       | 386 | OE1 | GLU | 30 | 18.033 | 6.881 | 27.446 |      |
| 1.00422.56 |     |     |     |    |        |       |        | O    |
| ATOM       | 387 | OE2 | GLU | 30 | 16.968 | 5.377 | 28.561 |      |
| 1.00410.81 |     |     |     |    |        |       |        | O1-  |
| ATOM       | 388 | HN  | GLU | 30 | 16.923 | 3.819 | 24.320 | 1.00 |
| 15.61      |     |     | H   |    |        |       |        |      |
| ATOM       | 389 | HA  | GLU | 30 | 17.431 | 3.462 | 27.148 | 1.00 |
| 24.60      |     |     | H   |    |        |       |        |      |
| ATOM       | 390 | HB1 | GLU | 30 | 15.125 | 4.306 | 27.415 | 1.00 |
| 72.67      |     |     | H   |    |        |       |        |      |

|            |     |     |     |    |        |        |        |      |
|------------|-----|-----|-----|----|--------|--------|--------|------|
| ATOM       | 391 | HB2 | GLU | 30 | 14.911 | 4.248  | 25.664 | 1.00 |
| 56.47      |     | H   |     |    |        |        |        |      |
| ATOM       | 392 | HG1 | GLU | 30 | 15.509 | 6.514  | 26.287 |      |
| 1.00196.66 |     | H   |     |    |        |        |        |      |
| ATOM       | 393 | HG2 | GLU | 30 | 16.876 | 5.793  | 25.440 |      |
| 1.00140.67 |     | H   |     |    |        |        |        |      |
| ATOM       | 394 | N   | LYS | 31 | 15.937 | 1.513  | 27.819 | 1.00 |
| 11.96      |     | N   |     |    |        |        |        |      |
| ATOM       | 395 | CA  | LYS | 31 | 15.345 | 0.214  | 28.147 | 1.00 |
| 11.40      |     | C   |     |    |        |        |        |      |
| ATOM       | 396 | C   | LYS | 31 | 14.060 | 0.407  | 28.940 | 1.00 |
| 10.99      |     | C   |     |    |        |        |        |      |
| ATOM       | 397 | O   | LYS | 31 | 13.957 | 1.318  | 29.762 | 1.00 |
| 12.86      |     | O   |     |    |        |        |        |      |
| ATOM       | 398 | CB  | LYS | 31 | 16.332 | -0.611 | 28.975 | 1.00 |
| 21.40      |     | C   |     |    |        |        |        |      |
| ATOM       | 399 | CG  | LYS | 31 | 17.585 | -0.894 | 28.144 | 1.00 |
| 57.81      |     | C   |     |    |        |        |        |      |
| ATOM       | 400 | CD  | LYS | 31 | 18.568 | -1.726 | 28.969 |      |
| 1.00115.52 |     | C   |     |    |        |        |        |      |
| ATOM       | 401 | CE  | LYS | 31 | 19.839 | -1.973 | 28.154 |      |
| 1.00250.23 |     | C   |     |    |        |        |        |      |
| ATOM       | 402 | NZ  | LYS | 31 | 19.503 | -2.764 | 26.936 |      |
| 1.00462.10 |     | N1+ |     |    |        |        |        |      |
| ATOM       | 403 | HN  | LYS | 31 | 16.240 | 2.097  | 28.546 | 1.00 |
| 26.13      |     | H   |     |    |        |        |        |      |
| ATOM       | 404 | HA  | LYS | 31 | 15.119 | -0.326 | 27.237 | 1.00 |
| 13.87      |     | H   |     |    |        |        |        |      |
| ATOM       | 405 | HB1 | LYS | 31 | 15.870 | -1.547 | 29.256 | 1.00 |
| 37.63      |     | H   |     |    |        |        |        |      |
| ATOM       | 406 | HB2 | LYS | 31 | 16.603 | -0.062 | 29.863 | 1.00 |
| 47.19      |     | H   |     |    |        |        |        |      |
| ATOM       | 407 | HG1 | LYS | 31 | 18.052 | 0.039  | 27.867 |      |
| 1.00126.32 |     | H   |     |    |        |        |        |      |
| ATOM       | 408 | HG2 | LYS | 31 | 17.311 | -1.438 | 27.252 |      |
| 1.00114.19 |     | H   |     |    |        |        |        |      |
| ATOM       | 409 | HD1 | LYS | 31 | 18.116 | -2.674 | 29.221 |      |
| 1.00198.45 |     | H   |     |    |        |        |        |      |
| ATOM       | 410 | HD2 | LYS | 31 | 18.818 | -1.194 | 29.875 |      |
| 1.00200.14 |     | H   |     |    |        |        |        |      |
| ATOM       | 411 | HE1 | LYS | 31 | 20.551 | -2.520 | 28.753 |      |
| 1.00374.64 |     | H   |     |    |        |        |        |      |
| ATOM       | 412 | HE2 | LYS | 31 | 20.267 | -1.026 | 27.861 |      |
| 1.00403.27 |     | H   |     |    |        |        |        |      |
| ATOM       | 413 | HZ1 | LYS | 31 | 19.970 | -2.343 | 26.108 |      |
| 1.00627.38 |     | H   |     |    |        |        |        |      |
| ATOM       | 414 | HZ2 | LYS | 31 | 18.471 | -2.758 | 26.793 |      |
| 1.00622.26 |     | H   |     |    |        |        |        |      |
| ATOM       | 415 | HZ3 | LYS | 31 | 19.831 | -3.743 | 27.057 |      |
| 1.00619.20 |     | H   |     |    |        |        |        |      |
| ATOM       | 416 | N   | THR | 32 | 13.079 | -0.451 | 28.685 | 1.00 |
| 15.51      |     | N   |     |    |        |        |        |      |



|            |     |      |     |    |        |        |        |      |
|------------|-----|------|-----|----|--------|--------|--------|------|
| ATOM       | 417 | CA   | THR | 32 | 11.803 | -0.360 | 29.381 | 1.00 |
| 22.44      |     |      | C   |    |        |        |        |      |
| ATOM       | 418 | C    | THR | 32 | 11.944 | -0.845 | 30.819 | 1.00 |
| 26.60      |     |      | C   |    |        |        |        |      |
| ATOM       | 419 | O    | THR | 32 | 12.396 | -1.963 | 31.068 | 1.00 |
| 57.43      |     |      | O   |    |        |        |        |      |
| ATOM       | 420 | CB   | THR | 32 | 10.751 | -1.200 | 28.649 | 1.00 |
| 56.28      |     |      | C   |    |        |        |        |      |
| ATOM       | 421 | CG2  | THR | 32 | 9.399  | -1.068 | 29.354 |      |
| 1.00102.70 |     |      | C   |    |        |        |        |      |
| ATOM       | 422 | OG1  | THR | 32 | 10.631 | -0.740 | 27.311 |      |
| 1.00111.17 |     |      | O   |    |        |        |        |      |
| ATOM       | 423 | HN   | THR | 32 | 13.216 | -1.155 | 28.018 | 1.00 |
| 18.79      |     |      | H   |    |        |        |        |      |
| ATOM       | 424 | HA   | THR | 32 | 11.481 | 0.671  | 29.388 | 1.00 |
| 19.67      |     |      | H   |    |        |        |        |      |
| ATOM       | 425 | HB   | THR | 32 | 11.051 | -2.235 | 28.649 | 1.00 |
| 84.25      |     |      | H   |    |        |        |        |      |
| ATOM       | 426 | HG1  | THR | 32 | 10.676 | -1.503 | 26.730 |      |
| 1.00205.03 |     |      | H   |    |        |        |        |      |
| ATOM       | 427 | HG21 | THR | 32 | 9.470  | -1.472 | 30.354 |      |
| 1.00220.71 |     |      | H   |    |        |        |        |      |
| ATOM       | 428 | HG22 | THR | 32 | 8.651  | -1.613 | 28.800 |      |
| 1.00174.67 |     |      | H   |    |        |        |        |      |
| ATOM       | 429 | HG23 | THR | 32 | 9.122  | -0.025 | 29.407 |      |
| 1.00217.44 |     |      | H   |    |        |        |        |      |
| ATOM       | 430 | N    | THR | 33 | 11.553 | 0.006  | 31.761 | 1.00 |
| 22.47      |     |      | N   |    |        |        |        |      |
| ATOM       | 431 | CA   | THR | 33 | 11.634 | -0.334 | 33.178 | 1.00 |
| 41.60      |     |      | C   |    |        |        |        |      |
| ATOM       | 432 | C    | THR | 33 | 10.602 | 0.428  | 33.964 | 1.00 |
| 38.03      |     |      | C   |    |        |        |        |      |
| ATOM       | 433 | O    | THR | 33 | 10.859 | 1.521  | 34.469 | 1.00 |
| 52.73      |     |      | O   |    |        |        |        |      |
| ATOM       | 434 | CB   | THR | 33 | 13.031 | -0.032 | 33.725 | 1.00 |
| 63.25      |     |      | C   |    |        |        |        |      |
| ATOM       | 435 | CG2  | THR | 33 | 14.048 | -0.997 | 33.111 |      |
| 1.00121.65 |     |      | C   |    |        |        |        |      |
| ATOM       | 436 | OG1  | THR | 33 | 13.386 | 1.304  | 33.396 | 1.00 |
| 96.20      |     |      | O   |    |        |        |        |      |
| ATOM       | 437 | HN   | THR | 33 | 11.202 | 0.882  | 31.498 | 1.00 |
| 23.82      |     |      | H   |    |        |        |        |      |
| ATOM       | 438 | HA   | THR | 33 | 11.422 | -1.377 | 33.312 | 1.00 |
| 67.12      |     |      | H   |    |        |        |        |      |
| ATOM       | 439 | HB   | THR | 33 | 13.031 | -0.150 | 34.797 |      |
| 1.00107.59 |     |      | H   |    |        |        |        |      |
| ATOM       | 440 | HG1  | THR | 33 | 13.928 | 1.651  | 34.109 |      |
| 1.00176.27 |     |      | H   |    |        |        |        |      |
| ATOM       | 441 | HG21 | THR | 33 | 13.663 | -2.004 | 33.158 |      |
| 1.00255.23 |     |      | H   |    |        |        |        |      |
| ATOM       | 442 | HG22 | THR | 33 | 14.975 | -0.941 | 33.663 |      |
| 1.00245.37 |     |      | H   |    |        |        |        |      |

|            |     |      |     |    |        |        |        |      |
|------------|-----|------|-----|----|--------|--------|--------|------|
| ATOM       | 443 | HG23 | THR | 33 | 14.226 | -0.726 | 32.081 |      |
| 1.00185.78 |     |      |     |    |        |        |        | H    |
| ATOM       | 444 | N    | GLY | 34 | 9.432  | -0.175 | 34.077 | 1.00 |
| 40.93      |     |      | N   |    |        |        |        |      |
| ATOM       | 445 | CA   | GLY | 34 | 8.363  | 0.437  | 34.822 | 1.00 |
| 45.59      |     |      | C   |    |        |        |        |      |
| ATOM       | 446 | C    | GLY | 34 | 7.786  | 1.630  | 34.070 | 1.00 |
| 40.97      |     |      | C   |    |        |        |        |      |
| ATOM       | 447 | O    | GLY | 34 | 6.571  | 1.826  | 34.034 | 1.00 |
| 82.17      |     |      | O   |    |        |        |        |      |
| ATOM       | 448 | HN   | GLY | 34 | 9.295  | -1.052 | 33.664 | 1.00 |
| 54.00      |     |      | H   |    |        |        |        |      |
| ATOM       | 449 | HA1  | GLY | 34 | 8.765  | 0.765  | 35.759 | 1.00 |
| 54.41      |     |      | H   |    |        |        |        |      |
| ATOM       | 450 | HA2  | GLY | 34 | 7.585  | -0.292 | 34.997 | 1.00 |
| 62.09      |     |      | H   |    |        |        |        |      |
| ATOM       | 451 | N    | ASN | 35 | 8.670  | 2.425  | 33.464 | 1.00 |
| 32.51      |     |      | N   |    |        |        |        |      |
| ATOM       | 452 | CA   | ASN | 35 | 8.252  | 3.603  | 32.701 | 1.00 |
| 33.20      |     |      | C   |    |        |        |        |      |
| ATOM       | 453 | C    | ASN | 35 | 8.983  | 3.655  | 31.363 | 1.00 |
| 23.17      |     |      | C   |    |        |        |        |      |
| ATOM       | 454 | O    | ASN | 35 | 10.172 | 3.348  | 31.281 | 1.00 |
| 27.01      |     |      | O   |    |        |        |        |      |
| ATOM       | 455 | CB   | ASN | 35 | 8.555  | 4.876  | 33.494 | 1.00 |
| 54.51      |     |      | C   |    |        |        |        |      |
| ATOM       | 456 | CG   | ASN | 35 | 7.796  | 4.860  | 34.817 | 1.00 |
| 80.73      |     |      | C   |    |        |        |        |      |
| ATOM       | 457 | ND2  | ASN | 35 | 8.402  | 5.234  | 35.910 |      |
| 1.00220.46 |     |      |     |    |        |        |        | N    |
| ATOM       | 458 | OD1  | ASN | 35 | 6.621  | 4.496  | 34.855 |      |
| 1.00117.80 |     |      |     |    |        |        |        | O    |
| ATOM       | 459 | HN   | ASN | 35 | 9.624  | 2.212  | 33.528 | 1.00 |
| 51.15      |     |      | H   |    |        |        |        |      |
| ATOM       | 460 | HA   | ASN | 35 | 7.187  | 3.556  | 32.513 | 1.00 |
| 47.21      |     |      | H   |    |        |        |        |      |
| ATOM       | 461 | HB1  | ASN | 35 | 8.249  | 5.736  | 32.917 | 1.00 |
| 68.31      |     |      | H   |    |        |        |        |      |
| ATOM       | 462 | HB2  | ASN | 35 | 9.616  | 4.932  | 33.689 | 1.00 |
| 57.75      |     |      | H   |    |        |        |        |      |
| ATOM       | 463 | HD21 | ASN | 35 | 9.337  | 5.524  | 35.878 |      |
| 1.00405.39 |     |      |     |    |        |        |        | H    |
| ATOM       | 464 | HD22 | ASN | 35 | 7.920  | 5.227  | 36.764 |      |
| 1.00245.64 |     |      |     |    |        |        |        | H    |
| ATOM       | 465 | N    | PHE | 36 | 8.260  | 4.040  | 30.314 | 1.00 |
| 35.72      |     |      | N   |    |        |        |        |      |
| ATOM       | 466 | CA   | PHE | 36 | 8.835  | 4.128  | 28.981 | 1.00 |
| 33.41      |     |      | C   |    |        |        |        |      |
| ATOM       | 467 | C    | PHE | 36 | 9.455  | 5.503  | 28.753 | 1.00 |
| 28.51      |     |      | C   |    |        |        |        |      |
| ATOM       | 468 | O    | PHE | 36 | 8.941  | 6.512  | 29.237 | 1.00 |
| 45.23      |     |      | O   |    |        |        |        |      |

|            |     |     |     |    |        |        |        |      |
|------------|-----|-----|-----|----|--------|--------|--------|------|
| ATOM       | 469 | CB  | PHE | 36 | 7.733  | 3.894  | 27.952 | 1.00 |
| 67.53      |     |     | C   |    |        |        |        |      |
| ATOM       | 470 | CG  | PHE | 36 | 7.203  | 2.487  | 28.089 | 1.00 |
| 86.71      |     |     | C   |    |        |        |        |      |
| ATOM       | 471 | CD1 | PHE | 36 | 6.144  | 2.225  | 28.967 |      |
| 1.00106.51 |     |     | C   |    |        |        |        |      |
| ATOM       | 472 | CD2 | PHE | 36 | 7.763  | 1.448  | 27.338 | 1.00 |
| 99.48      |     |     | C   |    |        |        |        |      |
| ATOM       | 473 | CE1 | PHE | 36 | 5.644  | 0.924  | 29.092 |      |
| 1.00134.48 |     |     | C   |    |        |        |        |      |
| ATOM       | 474 | CE2 | PHE | 36 | 7.265  | 0.146  | 27.464 |      |
| 1.00134.27 |     |     | C   |    |        |        |        |      |
| ATOM       | 475 | CZ  | PHE | 36 | 6.205  | -0.116 | 28.341 |      |
| 1.00149.48 |     |     | C   |    |        |        |        |      |
| ATOM       | 476 | HN  | PHE | 36 | 7.318  | 4.268  | 30.436 | 1.00 |
| 62.87      |     |     | H   |    |        |        |        |      |
| ATOM       | 477 | HA  | PHE | 36 | 9.594  | 3.368  | 28.861 | 1.00 |
| 28.53      |     |     | H   |    |        |        |        |      |
| ATOM       | 478 | HB1 | PHE | 36 | 8.132  | 4.033  | 26.966 | 1.00 |
| 73.56      |     |     | H   |    |        |        |        |      |
| ATOM       | 479 | HB2 | PHE | 36 | 6.932  | 4.599  | 28.119 | 1.00 |
| 88.42      |     |     | H   |    |        |        |        |      |
| ATOM       | 480 | HD1 | PHE | 36 | 5.713  | 3.028  | 29.548 |      |
| 1.00110.20 |     |     | H   |    |        |        |        |      |
| ATOM       | 481 | HD2 | PHE | 36 | 8.582  | 1.648  | 26.662 | 1.00 |
| 93.07      |     |     | H   |    |        |        |        |      |
| ATOM       | 482 | HE1 | PHE | 36 | 4.828  | 0.722  | 29.769 |      |
| 1.00155.06 |     |     | H   |    |        |        |        |      |
| ATOM       | 483 | HE2 | PHE | 36 | 7.696  | -0.656 | 26.884 |      |
| 1.00159.46 |     |     | H   |    |        |        |        |      |
| ATOM       | 484 | HZ  | PHE | 36 | 5.820  | -1.121 | 28.437 |      |
| 1.00183.25 |     |     | H   |    |        |        |        |      |
| ATOM       | 485 | N   | THR | 37 | 10.561 | 5.541  | 28.007 | 1.00 |
| 20.06      |     |     | N   |    |        |        |        |      |
| ATOM       | 486 | CA  | THR | 37 | 11.244 | 6.787  | 27.709 | 1.00 |
| 27.18      |     |     | C   |    |        |        |        |      |
| ATOM       | 487 | C   | THR | 37 | 11.598 | 6.829  | 26.231 | 1.00 |
| 41.87      |     |     | C   |    |        |        |        |      |
| ATOM       | 488 | O   | THR | 37 | 10.987 | 6.146  | 25.409 |      |
| 1.00169.86 |     |     | O   |    |        |        |        |      |
| ATOM       | 489 | CB  | THR | 37 | 12.519 | 6.898  | 28.547 | 1.00 |
| 26.52      |     |     | C   |    |        |        |        |      |
| ATOM       | 490 | CG2 | THR | 37 | 12.181 | 6.690  | 30.024 | 1.00 |
| 75.69      |     |     | C   |    |        |        |        |      |
| ATOM       | 491 | OG1 | THR | 37 | 13.448 | 5.907  | 28.127 | 1.00 |
| 81.95      |     |     | O   |    |        |        |        |      |
| ATOM       | 492 | HN  | THR | 37 | 10.927 | 4.715  | 27.642 | 1.00 |
| 18.47      |     |     | H   |    |        |        |        |      |
| ATOM       | 493 | HA  | THR | 37 | 10.599 | 7.623  | 27.940 | 1.00 |
| 38.80      |     |     | H   |    |        |        |        |      |
| ATOM       | 494 | HB  | THR | 37 | 12.953 | 7.877  | 28.416 | 1.00 |
| 81.60      |     |     | H   |    |        |        |        |      |

|            |     |      |     |    |        |        |        |      |
|------------|-----|------|-----|----|--------|--------|--------|------|
| ATOM       | 495 | HG1  | THR | 37 | 13.447 | 5.887  | 27.167 |      |
| 1.00188.80 |     |      |     |    |        |        |        | H    |
| ATOM       | 496 | HG21 | THR | 37 | 11.503 | 7.464  | 30.350 |      |
| 1.00196.98 |     |      |     |    |        |        |        | H    |
| ATOM       | 497 | HG22 | THR | 37 | 13.087 | 6.733  | 30.611 |      |
| 1.00196.23 |     |      |     |    |        |        |        | H    |
| ATOM       | 498 | HG23 | THR | 37 | 11.714 | 5.725  | 30.154 |      |
| 1.00168.92 |     |      |     |    |        |        |        | H    |
| ATOM       | 499 | N    | GLU | 38 | 12.587 | 7.640  | 25.908 | 1.00 |
| 26.53      |     |      | N   |    |        |        |        |      |
| ATOM       | 500 | CA   | GLU | 38 | 13.043 | 7.793  | 24.526 | 1.00 |
| 30.29      |     |      | C   |    |        |        |        |      |
| ATOM       | 501 | C    | GLU | 38 | 14.532 | 8.123  | 24.484 | 1.00 |
| 25.39      |     |      | C   |    |        |        |        |      |
| ATOM       | 502 | O    | GLU | 38 | 15.083 | 8.673  | 25.439 | 1.00 |
| 51.60      |     |      | O   |    |        |        |        |      |
| ATOM       | 503 | CB   | GLU | 38 | 12.266 | 8.914  | 23.826 | 1.00 |
| 54.82      |     |      | C   |    |        |        |        |      |
| ATOM       | 504 | CG   | GLU | 38 | 10.799 | 8.510  | 23.651 |      |
| 1.00165.84 |     |      | C   |    |        |        |        |      |
| ATOM       | 505 | CD   | GLU | 38 | 10.056 | 9.583  | 22.862 |      |
| 1.00292.92 |     |      | C   |    |        |        |        |      |
| ATOM       | 506 | OE1  | GLU | 38 | 10.667 | 10.593 | 22.554 |      |
| 1.00414.19 |     |      | O   |    |        |        |        |      |
| ATOM       | 507 | OE2  | GLU | 38 | 8.887  | 9.380  | 22.581 |      |
| 1.00537.65 |     |      | O1- |    |        |        |        |      |
| ATOM       | 508 | HN   | GLU | 38 | 13.023 | 8.142  | 26.618 | 1.00 |
| 84.50      |     |      | H   |    |        |        |        |      |
| ATOM       | 509 | HA   | GLU | 38 | 12.877 | 6.869  | 23.991 | 1.00 |
| 32.15      |     |      | H   |    |        |        |        |      |
| ATOM       | 510 | HB1  | GLU | 38 | 12.702 | 9.100  | 22.856 |      |
| 1.00144.82 |     |      | H   |    |        |        |        |      |
| ATOM       | 511 | HB2  | GLU | 38 | 12.321 | 9.814  | 24.422 |      |
| 1.00106.49 |     |      | H   |    |        |        |        |      |
| ATOM       | 512 | HG1  | GLU | 38 | 10.338 | 8.402  | 24.620 |      |
| 1.00303.31 |     |      | H   |    |        |        |        |      |
| ATOM       | 513 | HG2  | GLU | 38 | 10.745 | 7.571  | 23.120 |      |
| 1.00323.99 |     |      | H   |    |        |        |        |      |
| ATOM       | 514 | N    | CYS | 39 | 15.174 | 7.797  | 23.367 | 1.00 |
| 15.84      |     |      | N   |    |        |        |        |      |
| ATOM       | 515 | CA   | CYS | 39 | 16.594 | 8.077  | 23.203 | 1.00 |
| 14.30      |     |      | C   |    |        |        |        |      |
| ATOM       | 516 | C    | CYS | 39 | 16.821 | 9.593  | 23.172 | 1.00 |
| 22.31      |     |      | C   |    |        |        |        |      |
| ATOM       | 517 | O    | CYS | 39 | 15.942 | 10.337 | 22.735 | 1.00 |
| 32.92      |     |      | O   |    |        |        |        |      |
| ATOM       | 518 | CB   | CYS | 39 | 17.089 | 7.450  | 21.896 | 1.00 |
| 18.08      |     |      | C   |    |        |        |        |      |
| ATOM       | 519 | SG   | CYS | 39 | 16.012 | 7.971  | 20.536 | 1.00 |
| 17.41      |     |      | S   |    |        |        |        |      |
| ATOM       | 520 | HN   | CYS | 39 | 14.682 | 7.372  | 22.637 | 1.00 |
| 24.87      |     |      | H   |    |        |        |        |      |

|            |     |     |     |    |        |        |        |      |
|------------|-----|-----|-----|----|--------|--------|--------|------|
| ATOM       | 521 | HA  | CYS | 39 | 17.134 | 7.642  | 24.029 | 1.00 |
| 14.60      |     |     | H   |    |        |        |        |      |
| ATOM       | 522 | HB1 | CYS | 39 | 17.068 | 6.375  | 21.980 | 1.00 |
| 27.71      |     |     | H   |    |        |        |        |      |
| ATOM       | 523 | HB2 | CYS | 39 | 18.098 | 7.775  | 21.697 | 1.00 |
| 34.91      |     |     | H   |    |        |        |        |      |
| ATOM       | 524 | N   | PRO | 40 | 17.957 | 10.072 | 23.623 | 1.00 |
| 27.27      |     |     | N   |    |        |        |        |      |
| ATOM       | 525 | CA  | PRO | 40 | 18.249 | 11.534 | 23.633 | 1.00 |
| 47.66      |     |     | C   |    |        |        |        |      |
| ATOM       | 526 | C   | PRO | 40 | 18.522 | 12.071 | 22.230 | 1.00 |
| 71.54      |     |     | C   |    |        |        |        |      |
| ATOM       | 527 | O   | PRO | 40 | 19.312 | 11.503 | 21.475 | 1.00 |
| 87.70      |     |     | O   |    |        |        |        |      |
| ATOM       | 528 | CB  | PRO | 40 | 19.488 | 11.647 | 24.531 | 1.00 |
| 53.85      |     |     | C   |    |        |        |        |      |
| ATOM       | 529 | CG  | PRO | 40 | 20.185 | 10.335 | 24.376 | 1.00 |
| 46.04      |     |     | C   |    |        |        |        |      |
| ATOM       | 530 | CD  | PRO | 40 | 19.082 | 9.291  | 24.166 | 1.00 |
| 25.70      |     |     | C   |    |        |        |        |      |
| ATOM       | 531 | HA  | PRO | 40 | 17.429 | 12.073 | 24.081 | 1.00 |
| 58.04      |     |     | H   |    |        |        |        |      |
| ATOM       | 532 | HB1 | PRO | 40 | 19.195 | 11.791 | 25.560 | 1.00 |
| 67.93      |     |     | H   |    |        |        |        |      |
| ATOM       | 533 | HB2 | PRO | 40 | 20.124 | 12.461 | 24.204 | 1.00 |
| 70.99      |     |     | H   |    |        |        |        |      |
| ATOM       | 534 | HG1 | PRO | 40 | 20.748 | 10.098 | 25.268 | 1.00 |
| 65.91      |     |     | H   |    |        |        |        |      |
| ATOM       | 535 | HG2 | PRO | 40 | 20.845 | 10.364 | 23.517 | 1.00 |
| 54.99      |     |     | H   |    |        |        |        |      |
| ATOM       | 536 | HD1 | PRO | 40 | 18.802 | 8.836  | 25.104 | 1.00 |
| 24.22      |     |     | H   |    |        |        |        |      |
| ATOM       | 537 | HD2 | PRO | 40 | 19.402 | 8.543  | 23.458 | 1.00 |
| 26.94      |     |     | H   |    |        |        |        |      |
| ATOM       | 538 | N   | GLY | 41 | 17.861 | 13.169 | 21.897 |      |
| 1.00105.24 |     |     | N   |    |        |        |        |      |
| ATOM       | 539 | CA  | GLY | 41 | 18.029 | 13.791 | 20.589 |      |
| 1.00147.55 |     |     | C   |    |        |        |        |      |
| ATOM       | 540 | C   | GLY | 41 | 19.457 | 14.282 | 20.396 |      |
| 1.00161.74 |     |     | C   |    |        |        |        |      |
| ATOM       | 541 | O   | GLY | 41 | 20.029 | 14.157 | 19.313 |      |
| 1.00244.37 |     |     | O   |    |        |        |        |      |
| ATOM       | 542 | HN  | GLY | 41 | 17.249 | 13.570 | 22.545 |      |
| 1.00121.79 |     |     | H   |    |        |        |        |      |
| ATOM       | 543 | HA1 | GLY | 41 | 17.354 | 14.630 | 20.505 |      |
| 1.00184.40 |     |     | H   |    |        |        |        |      |
| ATOM       | 544 | HA2 | GLY | 41 | 17.795 | 13.070 | 19.823 |      |
| 1.00157.34 |     |     | H   |    |        |        |        |      |
| ATOM       | 545 | N   | LEU | 42 | 20.028 | 14.846 | 21.458 |      |
| 1.00162.48 |     |     | N   |    |        |        |        |      |
| ATOM       | 546 | CA  | LEU | 42 | 21.396 | 15.367 | 21.415 |      |
| 1.00191.48 |     |     | C   |    |        |        |        |      |

|            |     |      |     |    |        |        |        |
|------------|-----|------|-----|----|--------|--------|--------|
| ATOM       | 547 | C    | LEU | 42 | 22.326 | 14.481 | 22.238 |
| 1.00166.66 |     |      | C   |    |        |        |        |
| ATOM       | 548 | O    | LEU | 42 | 21.966 | 14.024 | 23.323 |
| 1.00251.38 |     |      | O   |    |        |        |        |
| ATOM       | 549 | CB   | LEU | 42 | 21.427 | 16.790 | 21.980 |
| 1.00307.99 |     |      | C   |    |        |        |        |
| ATOM       | 550 | CG   | LEU | 42 | 20.437 | 17.678 | 21.217 |
| 1.00452.28 |     |      | C   |    |        |        |        |
| ATOM       | 551 | CD1  | LEU | 42 | 20.436 | 19.078 | 21.839 |
| 1.00681.24 |     |      | C   |    |        |        |        |
| ATOM       | 552 | CD2  | LEU | 42 | 20.844 | 17.773 | 19.736 |
| 1.00527.46 |     |      | C   |    |        |        |        |
| ATOM       | 553 | HN   | LEU | 42 | 19.515 | 14.916 | 22.289 |
| 1.00195.47 |     |      | H   |    |        |        |        |
| ATOM       | 554 | HA   | LEU | 42 | 21.750 | 15.387 | 20.395 |
| 1.00229.77 |     |      | H   |    |        |        |        |
| ATOM       | 555 | HB1  | LEU | 42 | 22.422 | 17.195 | 21.876 |
| 1.00342.49 |     |      | H   |    |        |        |        |
| ATOM       | 556 | HB2  | LEU | 42 | 21.156 | 16.767 | 23.025 |
| 1.00335.33 |     |      | H   |    |        |        |        |
| ATOM       | 557 | HG   | LEU | 42 | 19.445 | 17.254 | 21.293 |
| 1.00427.79 |     |      | H   |    |        |        |        |
| ATOM       | 558 | HD11 | LEU | 42 | 21.451 | 19.442 | 21.907 |
| 1.00909.71 |     |      | H   |    |        |        |        |
| ATOM       | 559 | HD12 | LEU | 42 | 20.003 | 19.033 | 22.827 |
| 1.00706.80 |     |      | H   |    |        |        |        |
| ATOM       | 560 | HD13 | LEU | 42 | 19.854 | 19.747 | 21.221 |
| 1.00858.82 |     |      | H   |    |        |        |        |
| ATOM       | 561 | HD21 | LEU | 42 | 21.921 | 17.806 | 19.655 |
| 1.00631.69 |     |      | H   |    |        |        |        |
| ATOM       | 562 | HD22 | LEU | 42 | 20.425 | 18.667 | 19.298 |
| 1.00628.06 |     |      | H   |    |        |        |        |
| ATOM       | 563 | HD23 | LEU | 42 | 20.470 | 16.909 | 19.204 |
| 1.00656.75 |     |      | H   |    |        |        |        |
| ATOM       | 564 | N    | THR | 43 | 23.526 | 14.245 | 21.716 |
| 1.00178.52 |     |      | N   |    |        |        |        |
| ATOM       | 565 | CA   | THR | 43 | 24.500 | 13.414 | 22.411 |
| 1.00240.84 |     |      | C   |    |        |        |        |
| ATOM       | 566 | C    | THR | 43 | 25.038 | 14.153 | 23.643 |
| 1.00372.31 |     |      | C   |    |        |        |        |
| ATOM       | 567 | O    | THR | 43 | 25.104 | 15.381 | 23.644 |
| 1.00500.13 |     |      | O   |    |        |        |        |
| ATOM       | 568 | CB   | THR | 43 | 25.656 | 13.084 | 21.461 |
| 1.00354.13 |     |      | C   |    |        |        |        |
| ATOM       | 569 | CG2  | THR | 43 | 25.101 | 12.458 | 20.181 |
| 1.00463.04 |     |      | C   |    |        |        |        |
| ATOM       | 570 | OG1  | THR | 43 | 26.356 | 14.278 | 21.140 |
| 1.00508.50 |     |      | O   |    |        |        |        |
| ATOM       | 571 | HN   | THR | 43 | 23.758 | 14.637 | 20.849 |
| 1.00229.59 |     |      | H   |    |        |        |        |
| ATOM       | 572 | HA   | THR | 43 | 24.022 | 12.498 | 22.714 |
| 1.00249.90 |     |      | H   |    |        |        |        |

|            |     |      |     |    |        |        |        |
|------------|-----|------|-----|----|--------|--------|--------|
| ATOM       | 573 | HB   | THR | 43 | 26.330 | 12.389 | 21.933 |
| 1.00481.58 |     |      |     | H  |        |        |        |
| ATOM       | 574 | HG1  | THR | 43 | 26.658 | 14.210 | 20.231 |
| 1.00624.31 |     |      |     | H  |        |        |        |
| ATOM       | 575 | HG21 | THR | 43 | 25.915 | 12.233 | 19.509 |
| 1.00650.95 |     |      |     | H  |        |        |        |
| ATOM       | 576 | HG22 | THR | 43 | 24.422 | 13.151 | 19.706 |
| 1.00580.73 |     |      |     | H  |        |        |        |
| ATOM       | 577 | HG23 | THR | 43 | 24.574 | 11.547 | 20.426 |
| 1.00571.99 |     |      |     | H  |        |        |        |
| ATOM       | 578 | N    | PRO | 44 | 25.430 | 13.448 | 24.685 |
| 1.00488.39 |     |      |     | N  |        |        |        |
| ATOM       | 579 | CA   | PRO | 44 | 25.973 | 14.093 | 25.916 |
| 1.00760.13 |     |      |     | C  |        |        |        |
| ATOM       | 580 | C    | PRO | 44 | 27.418 | 14.539 | 25.716 |
| 1.00735.36 |     |      |     | C  |        |        |        |
| ATOM       | 581 | O    | PRO | 44 | 27.973 | 15.275 | 26.532 |
| 1.00999.99 |     |      |     | O  |        |        |        |
| ATOM       | 582 | CB   | PRO | 44 | 25.869 | 12.984 | 26.966 |
| 1.00999.99 |     |      |     | C  |        |        |        |
| ATOM       | 583 | CG   | PRO | 44 | 26.045 | 11.720 | 26.190 |
| 1.00856.94 |     |      |     | C  |        |        |        |
| ATOM       | 584 | CD   | PRO | 44 | 25.410 | 11.975 | 24.817 |
| 1.00548.09 |     |      |     | C  |        |        |        |
| ATOM       | 585 | HA   | PRO | 44 | 25.357 | 14.930 | 26.205 |
| 1.00939.00 |     |      |     | H  |        |        |        |
| ATOM       | 586 | HB1  | PRO | 44 | 24.895 | 13.000 | 27.434 |
| 1.00999.99 |     |      |     | H  |        |        |        |
| ATOM       | 587 | HB2  | PRO | 44 | 26.648 | 13.090 | 27.712 |
| 1.00999.99 |     |      |     | H  |        |        |        |
| ATOM       | 588 | HG1  | PRO | 44 | 25.540 | 10.902 | 26.682 |
| 1.00999.99 |     |      |     | H  |        |        |        |
| ATOM       | 589 | HG2  | PRO | 44 | 27.101 | 11.497 | 26.083 |
| 1.00853.53 |     |      |     | H  |        |        |        |
| ATOM       | 590 | HD1  | PRO | 44 | 24.394 | 11.611 | 24.797 |
| 1.00602.45 |     |      |     | H  |        |        |        |
| ATOM       | 591 | HD2  | PRO | 44 | 26.001 | 11.513 | 24.040 |
| 1.00463.32 |     |      |     | H  |        |        |        |
| ATOM       | 592 | N    | ILE | 45 | 28.018 | 14.077 | 24.624 |
| 1.00518.33 |     |      |     | N  |        |        |        |
| ATOM       | 593 | CA   | ILE | 45 | 29.398 | 14.421 | 24.318 |
| 1.00582.79 |     |      |     | C  |        |        |        |
| ATOM       | 594 | C    | ILE | 45 | 29.490 | 15.840 | 23.765 |
| 1.00795.93 |     |      |     | C  |        |        |        |
| ATOM       | 595 | O    | ILE | 45 | 28.793 | 16.192 | 22.814 |
| 1.00898.75 |     |      |     | O  |        |        |        |
| ATOM       | 596 | CB   | ILE | 45 | 29.965 | 13.436 | 23.295 |
| 1.00474.41 |     |      |     | C  |        |        |        |
| ATOM       | 597 | CG1  | ILE | 45 | 29.952 | 12.026 | 23.889 |
| 1.00516.90 |     |      |     | C  |        |        |        |
| ATOM       | 598 | CG2  | ILE | 45 | 31.402 | 13.830 | 22.948 |
| 1.00760.75 |     |      |     | C  |        |        |        |

|            |     |      |     |    |        |        |        |
|------------|-----|------|-----|----|--------|--------|--------|
| ATOM       | 599 | CD1  | ILE | 45 | 30.274 | 11.007 | 22.795 |
| 1.00566.81 |     |      | C   |    |        |        |        |
| ATOM       | 600 | HN   | ILE | 45 | 27.523 | 13.490 | 24.015 |
| 1.00395.72 |     |      | H   |    |        |        |        |
| ATOM       | 601 | HA   | ILE | 45 | 29.981 | 14.356 | 25.222 |
| 1.00711.06 |     |      | H   |    |        |        |        |
| ATOM       | 602 | HB   | ILE | 45 | 29.360 | 13.459 | 22.400 |
| 1.00477.81 |     |      | H   |    |        |        |        |
| ATOM       | 603 | HG11 | ILE | 45 | 28.974 | 11.816 | 24.295 |
| 1.00624.28 |     |      | H   |    |        |        |        |
| ATOM       | 604 | HG12 | ILE | 45 | 30.692 | 11.959 | 24.673 |
| 1.00744.84 |     |      | H   |    |        |        |        |
| ATOM       | 605 | HG21 | ILE | 45 | 31.959 | 13.998 | 23.859 |
| 1.00920.57 |     |      | H   |    |        |        |        |
| ATOM       | 606 | HG22 | ILE | 45 | 31.396 | 14.734 | 22.358 |
| 1.00999.99 |     |      | H   |    |        |        |        |
| ATOM       | 607 | HG23 | ILE | 45 | 31.868 | 13.035 | 22.384 |
| 1.00865.46 |     |      | H   |    |        |        |        |
| ATOM       | 608 | HD11 | ILE | 45 | 30.120 | 10.008 | 23.175 |
| 1.00658.89 |     |      | H   |    |        |        |        |
| ATOM       | 609 | HD12 | ILE | 45 | 31.303 | 11.121 | 22.489 |
| 1.00734.30 |     |      | H   |    |        |        |        |
| ATOM       | 610 | HD13 | ILE | 45 | 29.626 | 11.171 | 21.947 |
| 1.00675.84 |     |      | H   |    |        |        |        |
| ATOM       | 611 | N    | ALA | 46 | 30.353 | 16.650 | 24.369 |
| 1.00999.99 |     |      | N   |    |        |        |        |
| ATOM       | 612 | CA   | ALA | 46 | 30.528 | 18.029 | 23.929 |
| 1.00999.99 |     |      | C   |    |        |        |        |
| ATOM       | 613 | C    | ALA | 46 | 31.385 | 18.085 | 22.669 |
| 1.00999.99 |     |      | C   |    |        |        |        |
| ATOM       | 614 | CB   | ALA | 46 | 31.189 | 18.851 | 25.036 |
| 1.00999.99 |     |      | C   |    |        |        |        |
| ATOM       | 615 | OT1  | ALA | 46 | 30.843 | 18.386 | 21.618 |
| 1.00999.99 |     |      | O   |    |        |        |        |
| ATOM       | 616 | OT2  | ALA | 46 | 32.573 | 17.826 | 22.773 |
| 1.00999.99 |     |      | O   |    |        |        |        |
| ATOM       | 617 | HN   | ALA | 46 | 30.882 | 16.315 | 25.122 |
| 1.00999.99 |     |      | H   |    |        |        |        |
| ATOM       | 618 | HA   | ALA | 46 | 29.559 | 18.453 | 23.711 |
| 1.00999.99 |     |      | H   |    |        |        |        |
| ATOM       | 619 | HB1  | ALA | 46 | 32.060 | 18.328 | 25.401 |
| 1.00999.99 |     |      | H   |    |        |        |        |
| ATOM       | 620 | HB2  | ALA | 46 | 30.489 | 18.994 | 25.846 |
| 1.00999.99 |     |      | H   |    |        |        |        |
| ATOM       | 621 | HB3  | ALA | 46 | 31.486 | 19.813 | 24.643 |
| 1.00999.99 |     |      | H   |    |        |        |        |
| ENDMDL     |     |      |     |    |        |        |        |
| TER        |     |      |     |    |        |        |        |
| MODEL      | 20  |      |     |    |        |        |        |
| ATOM       | 1   | N    | GLY | 1  | 27.247 | -1.647 | 14.623 |
| 1.00999.99 |     |      | N   |    |        |        |        |
| ATOM       | 2   | CA   | GLY | 1  | 26.490 | -1.262 | 15.848 |



|            |    |      |     |   |   |        |        |        |
|------------|----|------|-----|---|---|--------|--------|--------|
| 1.00999.99 |    |      |     | C |   |        |        |        |
| ATOM       | 3  | C    | GLY |   | 1 | 25.306 | -0.384 | 15.459 |
| 1.00999.99 |    |      |     | C |   |        |        |        |
| ATOM       | 4  | O    | GLY |   | 1 | 24.737 | 0.316  | 16.297 |
| 1.00999.99 |    |      |     | O |   |        |        |        |
| ATOM       | 5  | HA1  | GLY |   | 1 | 27.137 | -0.712 | 16.514 |
| 1.00999.99 |    |      |     | H |   |        |        |        |
| ATOM       | 6  | HA2  | GLY |   | 1 | 26.133 | -2.152 | 16.346 |
| 1.00999.99 |    |      |     | H |   |        |        |        |
| ATOM       | 7  | HT1  | GLY |   | 1 | 26.629 | -2.194 | 13.991 |
| 1.00999.99 |    |      |     | H |   |        |        |        |
| ATOM       | 8  | HT2  | GLY |   | 1 | 28.068 | -2.227 | 14.892 |
| 1.00999.99 |    |      |     | H |   |        |        |        |
| ATOM       | 9  | HT3  | GLY |   | 1 | 27.572 | -0.792 | 14.132 |
| 1.00999.99 |    |      |     | H |   |        |        |        |
| ATOM       | 10 | N    | LEU |   | 2 | 24.938 | -0.427 | 14.182 |
| 1.00999.99 |    |      |     | N |   |        |        |        |
| ATOM       | 11 | CA   | LEU |   | 2 | 23.818 | 0.369  | 13.691 |
| 1.00895.59 |    |      |     | C |   |        |        |        |
| ATOM       | 12 | C    | LEU |   | 2 | 22.496 | -0.228 | 14.166 |
| 1.00532.27 |    |      |     | C |   |        |        |        |
| ATOM       | 13 | O    | LEU |   | 2 | 22.356 | -1.447 | 14.261 |
| 1.00625.21 |    |      |     | O |   |        |        |        |
| ATOM       | 14 | CB   | LEU |   | 2 | 23.839 | 0.409  | 12.161 |
| 1.00999.99 |    |      |     | C |   |        |        |        |
| ATOM       | 15 | CG   | LEU |   | 2 | 25.175 | 0.982  | 11.671 |
| 1.00999.99 |    |      |     | C |   |        |        |        |
| ATOM       | 16 | CD1  | LEU |   | 2 | 25.204 | 0.950  | 10.139 |
| 1.00999.99 |    |      |     | C |   |        |        |        |
| ATOM       | 17 | CD2  | LEU |   | 2 | 25.343 | 2.433  | 12.161 |
| 1.00999.99 |    |      |     | C |   |        |        |        |
| ATOM       | 18 | HN   | LEU |   | 2 | 25.428 | -1.004 | 13.559 |
| 1.00999.99 |    |      |     | H |   |        |        |        |
| ATOM       | 19 | HA   | LEU |   | 2 | 23.905 | 1.373  | 14.069 |
| 1.00890.87 |    |      |     | H |   |        |        |        |
| ATOM       | 20 | HB1  | LEU |   | 2 | 23.032 | 1.034  | 11.808 |
| 1.00924.07 |    |      |     | H |   |        |        |        |
| ATOM       | 21 | HB2  | LEU |   | 2 | 23.714 | -0.592 | 11.774 |
| 1.00999.99 |    |      |     | H |   |        |        |        |
| ATOM       | 22 | HG   | LEU |   | 2 | 25.984 | 0.376  | 12.055 |
| 1.00999.99 |    |      |     | H |   |        |        |        |
| ATOM       | 23 | HD11 | LEU |   | 2 | 24.310 | 1.418  | 9.753  |
| 1.00999.99 |    |      |     | H |   |        |        |        |
| ATOM       | 24 | HD12 | LEU |   | 2 | 25.248 | -0.075 | 9.802  |
| 1.00999.99 |    |      |     | H |   |        |        |        |
| ATOM       | 25 | HD13 | LEU |   | 2 | 26.073 | 1.485  | 9.785  |
| 1.00999.99 |    |      |     | H |   |        |        |        |
| ATOM       | 26 | HD21 | LEU |   | 2 | 24.384 | 2.931  | 12.165 |
| 1.00999.99 |    |      |     | H |   |        |        |        |
| ATOM       | 27 | HD22 | LEU |   | 2 | 26.019 | 2.964  | 11.507 |
| 1.00999.99 |    |      |     | H |   |        |        |        |
| ATOM       | 28 | HD23 | LEU |   | 2 | 25.750 | 2.429  | 13.161 |

|            |    |     |     |   |   |        |        |        |      |
|------------|----|-----|-----|---|---|--------|--------|--------|------|
| 1.00999.99 |    |     |     | H |   |        |        |        |      |
| ATOM       | 29 | N   | CYS |   | 3 | 21.527 | 0.635  | 14.463 |      |
| 1.00271.28 |    |     |     | N |   |        |        |        |      |
| ATOM       | 30 | CA  | CYS |   | 3 | 20.225 | 0.168  | 14.925 |      |
| 1.00104.50 |    |     |     | C |   |        |        |        |      |
| ATOM       | 31 | C   | CYS |   | 3 | 19.486 | -0.535 | 13.791 | 1.00 |
| 90.98      |    |     | C   |   |   |        |        |        |      |
| ATOM       | 32 | O   | CYS |   | 3 | 19.468 | -0.054 | 12.659 |      |
| 1.00207.28 |    |     |     | O |   |        |        |        |      |
| ATOM       | 33 | CB  | CYS |   | 3 | 19.382 | 1.350  | 15.421 | 1.00 |
| 37.83      |    |     | C   |   |   |        |        |        |      |
| ATOM       | 34 | SG  | CYS |   | 3 | 20.194 | 2.140  | 16.835 | 1.00 |
| 81.56      |    |     | S   |   |   |        |        |        |      |
| ATOM       | 35 | HN  | CYS |   | 3 | 21.691 | 1.597  | 14.369 |      |
| 1.00296.55 |    |     |     | H |   |        |        |        |      |
| ATOM       | 36 | HA  | CYS |   | 3 | 20.368 | -0.527 | 15.739 |      |
| 1.00166.45 |    |     |     | H |   |        |        |        |      |
| ATOM       | 37 | HB1 | CYS |   | 3 | 18.407 | 0.993  | 15.720 | 1.00 |
| 40.38      |    |     | H   |   |   |        |        |        |      |
| ATOM       | 38 | HB2 | CYS |   | 3 | 19.271 | 2.070  | 14.624 | 1.00 |
| 98.45      |    |     | H   |   |   |        |        |        |      |
| ATOM       | 39 | N   | SER |   | 4 | 18.877 | -1.674 | 14.102 | 1.00 |
| 85.31      |    |     | N   |   |   |        |        |        |      |
| ATOM       | 40 | CA  | SER |   | 4 | 18.138 | -2.431 | 13.097 | 1.00 |
| 92.94      |    |     | C   |   |   |        |        |        |      |
| ATOM       | 41 | C   | SER |   | 4 | 16.992 | -1.595 | 12.556 | 1.00 |
| 67.37      |    |     | C   |   |   |        |        |        |      |
| ATOM       | 42 | O   | SER |   | 4 | 16.724 | -1.579 | 11.355 |      |
| 1.00102.28 |    |     |     | O |   |        |        |        |      |
| ATOM       | 43 | CB  | SER |   | 4 | 17.550 | -3.693 | 13.718 |      |
| 1.00123.83 |    |     |     | C |   |        |        |        |      |
| ATOM       | 44 | OG  | SER |   | 4 | 16.941 | -4.477 | 12.700 |      |
| 1.00178.89 |    |     |     | O |   |        |        |        |      |
| ATOM       | 45 | HN  | SER |   | 4 | 18.923 | -2.010 | 15.022 |      |
| 1.00163.03 |    |     |     | H |   |        |        |        |      |
| ATOM       | 46 | HA  | SER |   | 4 | 18.799 | -2.704 | 12.290 |      |
| 1.00129.78 |    |     |     | H |   |        |        |        |      |
| ATOM       | 47 | HB1 | SER |   | 4 | 16.803 | -3.407 | 14.453 |      |
| 1.00105.26 |    |     |     | H |   |        |        |        |      |
| ATOM       | 48 | HB2 | SER |   | 4 | 18.327 | -4.265 | 14.197 |      |
| 1.00156.87 |    |     |     | H |   |        |        |        |      |
| ATOM       | 49 | HG  | SER |   | 4 | 17.639 | -4.859 | 12.163 |      |
| 1.00218.16 |    |     |     | H |   |        |        |        |      |
| ATOM       | 50 | N   | GLU |   | 5 | 16.304 | -0.924 | 13.470 | 1.00 |
| 41.67      |    |     | N   |   |   |        |        |        |      |
| ATOM       | 51 | CA  | GLU |   | 5 | 15.157 | -0.100 | 13.117 | 1.00 |
| 41.21      |    |     | C   |   |   |        |        |        |      |
| ATOM       | 52 | C   | GLU |   | 5 | 15.031 | 1.075  | 14.080 | 1.00 |
| 41.92      |    |     | C   |   |   |        |        |        |      |
| ATOM       | 53 | O   | GLU |   | 5 | 15.980 | 1.411  | 14.789 | 1.00 |
| 74.72      |    |     | O   |   |   |        |        |        |      |
| ATOM       | 54 | CB  | GLU |   | 5 | 13.891 | -0.954 | 13.167 | 1.00 |

|            |    |      |     |   |        |        |        |      |     |
|------------|----|------|-----|---|--------|--------|--------|------|-----|
| 49.24      |    |      | C   |   |        |        |        |      |     |
| ATOM       | 55 | CG   | GLU | 5 | 13.770 | -1.600 | 14.544 | 1.00 |     |
| 55.48      |    |      | C   |   |        |        |        |      |     |
| ATOM       | 56 | CD   | GLU | 5 | 12.689 | -2.675 | 14.525 | 1.00 |     |
| 92.06      |    |      | C   |   |        |        |        |      |     |
| ATOM       | 57 | OE1  | GLU | 5 | 12.860 | -3.646 | 13.807 |      |     |
| 1.00206.49 |    |      |     |   |        |        |        |      | O   |
| ATOM       | 58 | OE2  | GLU | 5 | 11.707 | -2.511 | 15.228 |      |     |
| 1.00197.24 |    |      |     |   |        |        |        |      | O1- |
| ATOM       | 59 | HN   | GLU | 5 | 16.564 | -1.000 | 14.412 | 1.00 |     |
| 45.52      |    |      | H   |   |        |        |        |      |     |
| ATOM       | 60 | HA   | GLU | 5 | 15.282 | 0.274  | 12.120 | 1.00 |     |
| 60.63      |    |      | H   |   |        |        |        |      |     |
| ATOM       | 61 | HB1  | GLU | 5 | 13.945 | -1.724 | 12.414 | 1.00 |     |
| 61.59      |    |      | H   |   |        |        |        |      |     |
| ATOM       | 62 | HB2  | GLU | 5 | 13.034 | -0.334 | 12.986 | 1.00 |     |
| 63.66      |    |      | H   |   |        |        |        |      |     |
| ATOM       | 63 | HG1  | GLU | 5 | 13.514 | -0.847 | 15.273 | 1.00 |     |
| 58.03      |    |      | H   |   |        |        |        |      |     |
| ATOM       | 64 | HG2  | GLU | 5 | 14.715 | -2.044 | 14.805 | 1.00 |     |
| 57.77      |    |      | H   |   |        |        |        |      |     |
| ATOM       | 65 | N    | ASN | 6 | 13.857 | 1.697  | 14.104 | 1.00 |     |
| 50.73      |    |      | N   |   |        |        |        |      |     |
| ATOM       | 66 | CA   | ASN | 6 | 13.630 | 2.832  | 14.989 | 1.00 |     |
| 71.04      |    |      | C   |   |        |        |        |      |     |
| ATOM       | 67 | C    | ASN | 6 | 13.829 | 2.413  | 16.442 | 1.00 |     |
| 65.17      |    |      | C   |   |        |        |        |      |     |
| ATOM       | 68 | O    | ASN | 6 | 14.393 | 3.160  | 17.243 | 1.00 |     |
| 94.86      |    |      | O   |   |        |        |        |      |     |
| ATOM       | 69 | CB   | ASN | 6 | 12.210 | 3.367  | 14.800 | 1.00 |     |
| 94.83      |    |      | C   |   |        |        |        |      |     |
| ATOM       | 70 | CG   | ASN | 6 | 12.092 | 4.071  | 13.452 |      |     |
| 1.00160.94 |    |      |     |   |        |        |        |      | C   |
| ATOM       | 71 | ND2  | ASN | 6 | 10.914 | 4.245  | 12.919 |      |     |
| 1.00244.88 |    |      |     |   |        |        |        |      | N   |
| ATOM       | 72 | OD1  | ASN | 6 | 13.100 | 4.471  | 12.869 |      |     |
| 1.00219.73 |    |      |     |   |        |        |        |      | O   |
| ATOM       | 73 | HN   | ASN | 6 | 13.134 | 1.388  | 13.519 | 1.00 |     |
| 72.81      |    |      | H   |   |        |        |        |      |     |
| ATOM       | 74 | HA   | ASN | 6 | 14.334 | 3.614  | 14.749 | 1.00 |     |
| 96.02      |    |      | H   |   |        |        |        |      |     |
| ATOM       | 75 | HB1  | ASN | 6 | 11.983 | 4.068  | 15.589 |      |     |
| 1.00111.09 |    |      |     |   |        |        |        |      | H   |
| ATOM       | 76 | HB2  | ASN | 6 | 11.510 | 2.546  | 14.838 | 1.00 |     |
| 98.13      |    |      | H   |   |        |        |        |      |     |
| ATOM       | 77 | HD21 | ASN | 6 | 10.113 | 3.926  | 13.386 |      |     |
| 1.00272.43 |    |      |     |   |        |        |        |      | H   |
| ATOM       | 78 | HD22 | ASN | 6 | 10.829 | 4.696  | 12.053 |      |     |
| 1.00336.78 |    |      |     |   |        |        |        |      | H   |
| ATOM       | 79 | N    | GLY | 7 | 13.368 | 1.207  | 16.773 | 1.00 |     |
| 51.80      |    |      | N   |   |        |        |        |      |     |
| ATOM       | 80 | CA   | GLY | 7 | 13.499 | 0.675  | 18.132 | 1.00 |     |

|            |     |     |     |   |        |        |        |      |     |
|------------|-----|-----|-----|---|--------|--------|--------|------|-----|
| 71.47      |     |     | C   |   |        |        |        |      |     |
| ATOM       | 81  | C   | GLY | 7 | 14.145 | -0.704 | 18.106 | 1.00 |     |
| 41.04      |     |     | C   |   |        |        |        |      |     |
| ATOM       | 82  | O   | GLY | 7 | 13.475 | -1.720 | 18.283 | 1.00 |     |
| 44.54      |     |     | O   |   |        |        |        |      |     |
| ATOM       | 83  | HN  | GLY | 7 | 12.932 | 0.660  | 16.087 | 1.00 |     |
| 45.49      |     |     | H   |   |        |        |        |      |     |
| ATOM       | 84  | HA1 | GLY | 7 | 12.523 | 0.594  | 18.576 |      |     |
| 1.00103.52 |     |     |     |   |        |        |        |      | H   |
| ATOM       | 85  | HA2 | GLY | 7 | 14.109 | 1.340  | 18.731 |      |     |
| 1.00108.67 |     |     |     |   |        |        |        |      | H   |
| ATOM       | 86  | N   | ASP | 8 | 15.452 | -0.727 | 17.880 | 1.00 |     |
| 27.00      |     |     | N   |   |        |        |        |      |     |
| ATOM       | 87  | CA  | ASP | 8 | 16.188 | -1.984 | 17.826 | 1.00 |     |
| 14.15      |     |     | C   |   |        |        |        |      |     |
| ATOM       | 88  | C   | ASP | 8 | 16.097 | -2.718 | 19.157 | 1.00 |     |
| 9.37       |     |     | C   |   |        |        |        |      |     |
| ATOM       | 89  | O   | ASP | 8 | 15.893 | -3.931 | 19.198 | 1.00 |     |
| 14.61      |     |     | O   |   |        |        |        |      |     |
| ATOM       | 90  | CB  | ASP | 8 | 17.656 | -1.719 | 17.490 | 1.00 |     |
| 15.06      |     |     | C   |   |        |        |        |      |     |
| ATOM       | 91  | CG  | ASP | 8 | 18.399 | -3.039 | 17.315 | 1.00 |     |
| 21.22      |     |     | C   |   |        |        |        |      |     |
| ATOM       | 92  | OD1 | ASP | 8 | 19.534 | -3.002 | 16.869 |      |     |
| 1.00119.56 |     |     |     |   |        |        |        |      | O   |
| ATOM       | 93  | OD2 | ASP | 8 | 17.822 | -4.067 | 17.630 |      |     |
| 1.00133.27 |     |     |     |   |        |        |        |      | O1- |
| ATOM       | 94  | HN  | ASP | 8 | 15.928 | 0.117  | 17.745 | 1.00 |     |
| 35.63      |     |     | H   |   |        |        |        |      |     |
| ATOM       | 95  | HA  | ASP | 8 | 15.763 | -2.606 | 17.057 | 1.00 |     |
| 20.92      |     |     | H   |   |        |        |        |      |     |
| ATOM       | 96  | HB1 | ASP | 8 | 18.110 | -1.159 | 18.292 | 1.00 |     |
| 29.39      |     |     | H   |   |        |        |        |      |     |
| ATOM       | 97  | HB2 | ASP | 8 | 17.717 | -1.148 | 16.574 | 1.00 |     |
| 44.14      |     |     | H   |   |        |        |        |      |     |
| ATOM       | 98  | N   | CYS | 9 | 16.245 | -1.972 | 20.244 | 1.00 |     |
| 5.93       |     |     | N   |   |        |        |        |      |     |
| ATOM       | 99  | CA  | CYS | 9 | 16.175 | -2.561 | 21.575 | 1.00 |     |
| 7.54       |     |     | C   |   |        |        |        |      |     |
| ATOM       | 100 | C   | CYS | 9 | 14.801 | -3.177 | 21.806 | 1.00 |     |
| 14.60      |     |     | C   |   |        |        |        |      |     |
| ATOM       | 101 | O   | CYS | 9 | 14.678 | -4.277 | 22.345 | 1.00 |     |
| 25.78      |     |     | O   |   |        |        |        |      |     |
| ATOM       | 102 | CB  | CYS | 9 | 16.436 | -1.496 | 22.628 | 1.00 |     |
| 6.63       |     |     | C   |   |        |        |        |      |     |
| ATOM       | 103 | SG  | CYS | 9 | 18.172 | -1.025 | 22.547 | 1.00 |     |
| 10.91      |     |     | S   |   |        |        |        |      |     |
| ATOM       | 104 | HN  | CYS | 9 | 16.403 | -1.011 | 20.148 | 1.00 |     |
| 6.51       |     |     | H   |   |        |        |        |      |     |
| ATOM       | 105 | HA  | CYS | 9 | 16.934 | -3.320 | 21.664 | 1.00 |     |
| 11.12      |     |     | H   |   |        |        |        |      |     |
| ATOM       | 106 | HB1 | CYS | 9 | 16.218 | -1.892 | 23.607 | 1.00 |     |

|            |     |     |     |    |        |        |        |      |  |
|------------|-----|-----|-----|----|--------|--------|--------|------|--|
| 11.28      |     |     | H   |    |        |        |        |      |  |
| ATOM       | 107 | HB2 | CYS | 9  | 15.814 | -0.634 | 22.437 | 1.00 |  |
| 5.04       |     |     | H   |    |        |        |        |      |  |
| ATOM       | 108 | N   | ALA | 10 | 13.775 | -2.452 | 21.380 | 1.00 |  |
| 16.26      |     |     | N   |    |        |        |        |      |  |
| ATOM       | 109 | CA  | ALA | 10 | 12.398 | -2.910 | 21.522 | 1.00 |  |
| 32.04      |     |     | C   |    |        |        |        |      |  |
| ATOM       | 110 | C   | ALA | 10 | 11.469 | -2.029 | 20.688 | 1.00 |  |
| 45.47      |     |     | C   |    |        |        |        |      |  |
| ATOM       | 111 | O   | ALA | 10 | 11.870 | -0.967 | 20.215 |      |  |
| 1.00119.04 |     |     | O   |    |        |        |        |      |  |
| ATOM       | 112 | CB  | ALA | 10 | 11.976 | -2.875 | 22.996 | 1.00 |  |
| 30.10      |     |     | C   |    |        |        |        |      |  |
| ATOM       | 113 | HN  | ALA | 10 | 13.949 | -1.588 | 20.955 | 1.00 |  |
| 12.81      |     |     | H   |    |        |        |        |      |  |
| ATOM       | 114 | HA  | ALA | 10 | 12.331 | -3.926 | 21.163 | 1.00 |  |
| 47.14      |     |     | H   |    |        |        |        |      |  |
| ATOM       | 115 | HB1 | ALA | 10 | 12.814 | -3.156 | 23.617 | 1.00 |  |
| 84.37      |     |     | H   |    |        |        |        |      |  |
| ATOM       | 116 | HB2 | ALA | 10 | 11.164 | -3.569 | 23.155 |      |  |
| 1.00118.20 |     |     | H   |    |        |        |        |      |  |
| ATOM       | 117 | HB3 | ALA | 10 | 11.652 | -1.879 | 23.260 |      |  |
| 1.00117.32 |     |     | H   |    |        |        |        |      |  |
| ATOM       | 118 | N   | ALA | 11 | 10.233 | -2.477 | 20.506 | 1.00 |  |
| 30.62      |     |     | N   |    |        |        |        |      |  |
| ATOM       | 119 | CA  | ALA | 11 | 9.268  | -1.717 | 19.720 | 1.00 |  |
| 35.24      |     |     | C   |    |        |        |        |      |  |
| ATOM       | 120 | C   | ALA | 11 | 9.015  | -0.343 | 20.338 | 1.00 |  |
| 22.78      |     |     | C   |    |        |        |        |      |  |
| ATOM       | 121 | O   | ALA | 11 | 8.915  | 0.657  | 19.627 | 1.00 |  |
| 53.33      |     |     | O   |    |        |        |        |      |  |
| ATOM       | 122 | CB  | ALA | 11 | 7.950  | -2.487 | 19.632 | 1.00 |  |
| 60.49      |     |     | C   |    |        |        |        |      |  |
| ATOM       | 123 | HN  | ALA | 11 | 9.966  | -3.333 | 20.903 | 1.00 |  |
| 50.37      |     |     | H   |    |        |        |        |      |  |
| ATOM       | 124 | HA  | ALA | 11 | 9.658  | -1.584 | 18.723 | 1.00 |  |
| 41.70      |     |     | H   |    |        |        |        |      |  |
| ATOM       | 125 | HB1 | ALA | 11 | 7.199  | -1.865 | 19.168 |      |  |
| 1.00157.06 |     |     | H   |    |        |        |        |      |  |
| ATOM       | 126 | HB2 | ALA | 11 | 7.625  | -2.761 | 20.625 |      |  |
| 1.00148.83 |     |     | H   |    |        |        |        |      |  |
| ATOM       | 127 | HB3 | ALA | 11 | 8.092  | -3.380 | 19.042 |      |  |
| 1.00137.06 |     |     | H   |    |        |        |        |      |  |
| ATOM       | 128 | N   | ASP | 12 | 8.904  | -0.300 | 21.664 | 1.00 |  |
| 18.98      |     |     | N   |    |        |        |        |      |  |
| ATOM       | 129 | CA  | ASP | 12 | 8.651  | 0.960  | 22.367 | 1.00 |  |
| 31.05      |     |     | C   |    |        |        |        |      |  |
| ATOM       | 130 | C   | ASP | 12 | 9.952  | 1.711  | 22.644 | 1.00 |  |
| 22.98      |     |     | C   |    |        |        |        |      |  |
| ATOM       | 131 | O   | ASP | 12 | 9.967  | 2.940  | 22.706 | 1.00 |  |
| 37.14      |     |     | O   |    |        |        |        |      |  |
| ATOM       | 132 | CB  | ASP | 12 | 7.936  | 0.678  | 23.690 | 1.00 |  |

|            |     |     |     |    |        |        |        |      |  |
|------------|-----|-----|-----|----|--------|--------|--------|------|--|
| 48.35      |     |     | C   |    |        |        |        |      |  |
| ATOM       | 133 | CG  | ASP | 12 | 6.520  | 0.182  | 23.420 |      |  |
| 1.00104.83 |     |     | C   |    |        |        |        |      |  |
| ATOM       | 134 | OD1 | ASP | 12 | 6.062  | 0.333  | 22.300 |      |  |
| 1.00258.73 |     |     | O   |    |        |        |        |      |  |
| ATOM       | 135 | OD2 | ASP | 12 | 5.912  | -0.343 | 24.339 |      |  |
| 1.00213.46 |     |     | O1- |    |        |        |        |      |  |
| ATOM       | 136 | HN  | ASP | 12 | 8.986  | -1.129 | 22.181 | 1.00 |  |
| 36.19      |     |     | H   |    |        |        |        |      |  |
| ATOM       | 137 | HA  | ASP | 12 | 8.013  | 1.581  | 21.756 | 1.00 |  |
| 49.76      |     |     | H   |    |        |        |        |      |  |
| ATOM       | 138 | HB1 | ASP | 12 | 7.892  | 1.585  | 24.273 | 1.00 |  |
| 95.71      |     |     | H   |    |        |        |        |      |  |
| ATOM       | 139 | HB2 | ASP | 12 | 8.482  | -0.076 | 24.238 | 1.00 |  |
| 54.37      |     |     | H   |    |        |        |        |      |  |
| ATOM       | 140 | N   | GLU | 13 | 11.038 | 0.966  | 22.821 | 1.00 |  |
| 17.60      |     |     | N   |    |        |        |        |      |  |
| ATOM       | 141 | CA  | GLU | 13 | 12.337 | 1.572  | 23.104 | 1.00 |  |
| 12.01      |     |     | C   |    |        |        |        |      |  |
| ATOM       | 142 | C   | GLU | 13 | 12.940 | 2.188  | 21.842 | 1.00 |  |
| 10.07      |     |     | C   |    |        |        |        |      |  |
| ATOM       | 143 | O   | GLU | 13 | 12.633 | 1.768  | 20.726 | 1.00 |  |
| 12.81      |     |     | O   |    |        |        |        |      |  |
| ATOM       | 144 | CB  | GLU | 13 | 13.279 | 0.514  | 23.673 | 1.00 |  |
| 11.74      |     |     | C   |    |        |        |        |      |  |
| ATOM       | 145 | CG  | GLU | 13 | 12.718 | 0.014  | 25.007 | 1.00 |  |
| 13.49      |     |     | C   |    |        |        |        |      |  |
| ATOM       | 146 | CD  | GLU | 13 | 13.460 | -1.238 | 25.455 |      |  |
| 1.00142.36 |     |     | C   |    |        |        |        |      |  |
| ATOM       | 147 | OE1 | GLU | 13 | 14.658 | -1.299 | 25.243 |      |  |
| 1.00339.06 |     |     | O   |    |        |        |        |      |  |
| ATOM       | 148 | OE2 | GLU | 13 | 12.820 | -2.118 | 26.006 |      |  |
| 1.00335.28 |     |     | O1- |    |        |        |        |      |  |
| ATOM       | 149 | HN  | GLU | 13 | 10.965 | -0.010 | 22.767 | 1.00 |  |
| 28.36      |     |     | H   |    |        |        |        |      |  |
| ATOM       | 150 | HA  | GLU | 13 | 12.203 | 2.349  | 23.842 | 1.00 |  |
| 13.06      |     |     | H   |    |        |        |        |      |  |
| ATOM       | 151 | HB1 | GLU | 13 | 14.254 | 0.947  | 23.835 | 1.00 |  |
| 13.76      |     |     | H   |    |        |        |        |      |  |
| ATOM       | 152 | HB2 | GLU | 13 | 13.359 | -0.310 | 22.979 | 1.00 |  |
| 9.94       |     |     | H   |    |        |        |        |      |  |
| ATOM       | 153 | HG1 | GLU | 13 | 11.668 | -0.213 | 24.893 | 1.00 |  |
| 66.02      |     |     | H   |    |        |        |        |      |  |
| ATOM       | 154 | HG2 | GLU | 13 | 12.836 | 0.786  | 25.754 | 1.00 |  |
| 56.23      |     |     | H   |    |        |        |        |      |  |
| ATOM       | 155 | N   | CYS | 14 | 13.802 | 3.193  | 22.029 | 1.00 |  |
| 9.12       |     |     | N   |    |        |        |        |      |  |
| ATOM       | 156 | CA  | CYS | 14 | 14.450 | 3.875  | 20.903 | 1.00 |  |
| 10.69      |     |     | C   |    |        |        |        |      |  |
| ATOM       | 157 | C   | CYS | 14 | 15.904 | 3.435  | 20.770 | 1.00 |  |
| 9.56       |     |     | C   |    |        |        |        |      |  |
| ATOM       | 158 | O   | CYS | 14 | 16.556 | 3.114  | 21.760 | 1.00 |  |

|            |     |     |     |    |        |       |        |      |
|------------|-----|-----|-----|----|--------|-------|--------|------|
| 13.62      |     |     | O   |    |        |       |        |      |
| ATOM       | 159 | CB  | CYS | 14 | 14.401 | 5.392 | 21.110 | 1.00 |
| 13.96      |     |     | C   |    |        |       |        |      |
| ATOM       | 160 | SG  | CYS | 14 | 15.330 | 6.207 | 19.784 | 1.00 |
| 42.96      |     |     | S   |    |        |       |        |      |
| ATOM       | 161 | HN  | CYS | 14 | 14.007 | 3.484 | 22.944 | 1.00 |
| 9.76       |     |     | H   |    |        |       |        |      |
| ATOM       | 162 | HA  | CYS | 14 | 13.928 | 3.635 | 19.987 | 1.00 |
| 15.54      |     |     | H   |    |        |       |        |      |
| ATOM       | 163 | HB1 | CYS | 14 | 14.840 | 5.640 | 22.065 | 1.00 |
| 50.72      |     |     | H   |    |        |       |        |      |
| ATOM       | 164 | HB2 | CYS | 14 | 13.375 | 5.725 | 21.089 | 1.00 |
| 46.13      |     |     | H   |    |        |       |        |      |
| ATOM       | 165 | N   | CYS | 15 | 16.405 | 3.428 | 19.534 | 1.00 |
| 9.60       |     |     | N   |    |        |       |        |      |
| ATOM       | 166 | CA  | CYS | 15 | 17.789 | 3.035 | 19.265 | 1.00 |
| 9.28       |     |     | C   |    |        |       |        |      |
| ATOM       | 167 | C   | CYS | 15 | 18.413 | 4.011 | 18.278 | 1.00 |
| 9.92       |     |     | C   |    |        |       |        |      |
| ATOM       | 168 | O   | CYS | 15 | 17.886 | 4.218 | 17.186 | 1.00 |
| 13.31      |     |     | O   |    |        |       |        |      |
| ATOM       | 169 | CB  | CYS | 15 | 17.827 | 1.623 | 18.671 | 1.00 |
| 12.90      |     |     | C   |    |        |       |        |      |
| ATOM       | 170 | SG  | CYS | 15 | 19.549 | 1.101 | 18.445 | 1.00 |
| 39.11      |     |     | S   |    |        |       |        |      |
| ATOM       | 171 | HN  | CYS | 15 | 15.835 | 3.704 | 18.786 | 1.00 |
| 13.12      |     |     | H   |    |        |       |        |      |
| ATOM       | 172 | HA  | CYS | 15 | 18.360 | 3.048 | 20.184 | 1.00 |
| 8.26       |     |     | H   |    |        |       |        |      |
| ATOM       | 173 | HB1 | CYS | 15 | 17.323 | 1.622 | 17.716 | 1.00 |
| 24.82      |     |     | H   |    |        |       |        |      |
| ATOM       | 174 | HB2 | CYS | 15 | 17.329 | 0.939 | 19.342 | 1.00 |
| 27.31      |     |     | H   |    |        |       |        |      |
| ATOM       | 175 | N   | VAL | 16 | 19.533 | 4.616 | 18.664 | 1.00 |
| 9.56       |     |     | N   |    |        |       |        |      |
| ATOM       | 176 | CA  | VAL | 16 | 20.209 | 5.573 | 17.793 | 1.00 |
| 11.99      |     |     | C   |    |        |       |        |      |
| ATOM       | 177 | C   | VAL | 16 | 21.718 | 5.441 | 17.938 | 1.00 |
| 7.73       |     |     | C   |    |        |       |        |      |
| ATOM       | 178 | O   | VAL | 16 | 22.252 | 5.472 | 19.047 | 1.00 |
| 8.83       |     |     | O   |    |        |       |        |      |
| ATOM       | 179 | CB  | VAL | 16 | 19.765 | 6.995 | 18.150 | 1.00 |
| 18.37      |     |     | C   |    |        |       |        |      |
| ATOM       | 180 | CG1 | VAL | 16 | 20.355 | 7.407 | 19.502 | 1.00 |
| 39.61      |     |     | C   |    |        |       |        |      |
| ATOM       | 181 | CG2 | VAL | 16 | 20.240 | 7.961 | 17.065 |      |
| 1.00115.21 |     |     |     | C  |        |       |        |      |
| ATOM       | 182 | HN  | VAL | 16 | 19.914 | 4.417 | 19.548 | 1.00 |
| 9.76       |     |     | H   |    |        |       |        |      |
| ATOM       | 183 | HA  | VAL | 16 | 19.942 | 5.374 | 16.763 | 1.00 |
| 17.27      |     |     | H   |    |        |       |        |      |
| ATOM       | 184 | HB  | VAL | 16 | 18.687 | 7.026 | 18.209 | 1.00 |

|            |     |      |     |    |        |       |        |      |  |
|------------|-----|------|-----|----|--------|-------|--------|------|--|
| 52.63      |     |      | H   |    |        |       |        |      |  |
| ATOM       | 185 | HG11 | VAL | 16 | 21.402 | 7.644 | 19.381 |      |  |
| 1.00128.07 |     |      |     |    |        |       |        | H    |  |
| ATOM       | 186 | HG12 | VAL | 16 | 20.248 | 6.592 | 20.203 |      |  |
| 1.00154.13 |     |      |     |    |        |       |        | H    |  |
| ATOM       | 187 | HG13 | VAL | 16 | 19.830 | 8.273 | 19.874 |      |  |
| 1.00135.74 |     |      |     |    |        |       |        | H    |  |
| ATOM       | 188 | HG21 | VAL | 16 | 19.650 | 7.815 | 16.173 |      |  |
| 1.00229.05 |     |      |     |    |        |       |        | H    |  |
| ATOM       | 189 | HG22 | VAL | 16 | 21.281 | 7.772 | 16.844 |      |  |
| 1.00261.82 |     |      |     |    |        |       |        | H    |  |
| ATOM       | 190 | HG23 | VAL | 16 | 20.124 | 8.976 | 17.411 |      |  |
| 1.00210.07 |     |      |     |    |        |       |        | H    |  |
| ATOM       | 191 | N    | ASP | 17 | 22.403 | 5.283 | 16.806 | 1.00 |  |
| 14.34      |     |      | N   |    |        |       |        |      |  |
| ATOM       | 192 | CA   | ASP | 17 | 23.858 | 5.134 | 16.805 | 1.00 |  |
| 11.90      |     |      | C   |    |        |       |        |      |  |
| ATOM       | 193 | C    | ASP | 17 | 24.533 | 6.369 | 16.225 | 1.00 |  |
| 13.15      |     |      | C   |    |        |       |        |      |  |
| ATOM       | 194 | O    | ASP | 17 | 24.330 | 6.714 | 15.060 | 1.00 |  |
| 25.96      |     |      | O   |    |        |       |        |      |  |
| ATOM       | 195 | CB   | ASP | 17 | 24.246 | 3.905 | 15.987 | 1.00 |  |
| 20.80      |     |      | C   |    |        |       |        |      |  |
| ATOM       | 196 | CG   | ASP | 17 | 23.608 | 2.664 | 16.600 | 1.00 |  |
| 28.72      |     |      | C   |    |        |       |        |      |  |
| ATOM       | 197 | OD1  | ASP | 17 | 22.747 | 2.086 | 15.961 |      |  |
| 1.00135.42 |     |      |     |    |        |       |        | O    |  |
| ATOM       | 198 | OD2  | ASP | 17 | 23.993 | 2.308 | 17.702 |      |  |
| 1.00114.17 |     |      |     |    |        |       |        | O1-  |  |
| ATOM       | 199 | HN   | ASP | 17 | 21.919 | 5.260 | 15.954 | 1.00 |  |
| 28.29      |     |      | H   |    |        |       |        |      |  |
| ATOM       | 200 | HA   | ASP | 17 | 24.209 | 4.993 | 17.817 | 1.00 |  |
| 10.49      |     |      | H   |    |        |       |        |      |  |
| ATOM       | 201 | HB1  | ASP | 17 | 25.320 | 3.794 | 15.990 | 1.00 |  |
| 22.42      |     |      | H   |    |        |       |        |      |  |
| ATOM       | 202 | HB2  | ASP | 17 | 23.900 | 4.026 | 14.970 | 1.00 |  |
| 29.52      |     |      | H   |    |        |       |        |      |  |
| ATOM       | 203 | N    | THR | 18 | 25.350 | 7.022 | 17.046 | 1.00 |  |
| 11.55      |     |      | N   |    |        |       |        |      |  |
| ATOM       | 204 | CA   | THR | 18 | 26.080 | 8.216 | 16.622 | 1.00 |  |
| 17.10      |     |      | C   |    |        |       |        |      |  |
| ATOM       | 205 | C    | THR | 18 | 27.540 | 7.870 | 16.380 | 1.00 |  |
| 10.63      |     |      | C   |    |        |       |        |      |  |
| ATOM       | 206 | O    | THR | 18 | 28.004 | 6.802 | 16.775 | 1.00 |  |
| 6.49       |     |      | O   |    |        |       |        |      |  |
| ATOM       | 207 | CB   | THR | 18 | 25.991 | 9.302 | 17.695 | 1.00 |  |
| 28.52      |     |      | C   |    |        |       |        |      |  |
| ATOM       | 208 | CG2  | THR | 18 | 24.543 | 9.767 | 17.841 | 1.00 |  |
| 45.38      |     |      | C   |    |        |       |        |      |  |
| ATOM       | 209 | OG1  | THR | 18 | 26.455 | 8.785 | 18.933 | 1.00 |  |
| 26.49      |     |      | O   |    |        |       |        |      |  |
| ATOM       | 210 | HN   | THR | 18 | 25.476 | 6.686 | 17.958 | 1.00 |  |



|            |     |      |     |    |        |        |        |      |   |
|------------|-----|------|-----|----|--------|--------|--------|------|---|
| 13.96      |     |      | H   |    |        |        |        |      |   |
| ATOM       | 211 | HA   | THR | 18 | 25.653 | 8.597  | 15.703 | 1.00 |   |
| 26.43      |     |      | H   |    |        |        |        |      |   |
| ATOM       | 212 | HB   | THR | 18 | 26.604 | 10.143 | 17.407 | 1.00 |   |
| 37.43      |     |      | H   |    |        |        |        |      |   |
| ATOM       | 213 | HG1  | THR | 18 | 25.734 | 8.299  | 19.341 | 1.00 |   |
| 71.62      |     |      | H   |    |        |        |        |      |   |
| ATOM       | 214 | HG21 | THR | 18 | 24.436 | 10.322 | 18.761 |      |   |
| 1.00100.44 |     |      |     |    |        |        |        |      | H |
| ATOM       | 215 | HG22 | THR | 18 | 23.889 | 8.909  | 17.858 |      |   |
| 1.00129.42 |     |      |     |    |        |        |        |      | H |
| ATOM       | 216 | HG23 | THR | 18 | 24.285 | 10.401 | 17.006 |      |   |
| 1.00156.21 |     |      |     |    |        |        |        |      | H |
| ATOM       | 217 | N    | VAL | 19 | 28.260 | 8.788  | 15.750 | 1.00 |   |
| 16.32      |     |      | N   |    |        |        |        |      |   |
| ATOM       | 218 | CA   | VAL | 19 | 29.662 | 8.596  | 15.471 | 1.00 |   |
| 13.34      |     |      | C   |    |        |        |        |      |   |
| ATOM       | 219 | C    | VAL | 19 | 30.195 | 9.804  | 14.733 | 1.00 |   |
| 25.88      |     |      | C   |    |        |        |        |      |   |
| ATOM       | 220 | O    | VAL | 19 | 29.766 | 10.133 | 13.627 | 1.00 |   |
| 42.11      |     |      | O   |    |        |        |        |      |   |
| ATOM       | 221 | CB   | VAL | 19 | 29.916 | 7.332  | 14.648 | 1.00 |   |
| 15.48      |     |      | C   |    |        |        |        |      |   |
| ATOM       | 222 | CG1  | VAL | 19 | 29.011 | 7.314  | 13.413 | 1.00 |   |
| 29.06      |     |      | C   |    |        |        |        |      |   |
| ATOM       | 223 | CG2  | VAL | 19 | 31.388 | 7.314  | 14.210 | 1.00 |   |
| 20.67      |     |      | C   |    |        |        |        |      |   |
| ATOM       | 224 | HN   | VAL | 19 | 27.845 | 9.627  | 15.480 | 1.00 |   |
| 26.89      |     |      | H   |    |        |        |        |      |   |
| ATOM       | 225 | HA   | VAL | 19 | 30.188 | 8.506  | 16.410 | 1.00 |   |
| 8.08       |     |      | H   |    |        |        |        |      |   |
| ATOM       | 226 | HB   | VAL | 19 | 29.713 | 6.468  | 15.259 | 1.00 |   |
| 11.49      |     |      | H   |    |        |        |        |      |   |
| ATOM       | 227 | HG11 | VAL | 19 | 28.006 | 7.591  | 13.694 |      |   |
| 1.00137.43 |     |      |     |    |        |        |        |      | H |
| ATOM       | 228 | HG12 | VAL | 19 | 29.003 | 6.322  | 12.988 | 1.00 |   |
| 93.29      |     |      | H   |    |        |        |        |      |   |
| ATOM       | 229 | HG13 | VAL | 19 | 29.387 | 8.014  | 12.681 |      |   |
| 1.00108.69 |     |      |     |    |        |        |        |      | H |
| ATOM       | 230 | HG21 | VAL | 19 | 31.527 | 8.012  | 13.396 | 1.00 |   |
| 99.42      |     |      | H   |    |        |        |        |      |   |
| ATOM       | 231 | HG22 | VAL | 19 | 31.658 | 6.322  | 13.888 |      |   |
| 1.00111.36 |     |      |     |    |        |        |        |      | H |
| ATOM       | 232 | HG23 | VAL | 19 | 32.015 | 7.611  | 15.043 | 1.00 |   |
| 77.11      |     |      | H   |    |        |        |        |      |   |
| ATOM       | 233 | N    | PHE | 20 | 31.123 | 10.458 | 15.381 | 1.00 |   |
| 24.58      |     |      | N   |    |        |        |        |      |   |
| ATOM       | 234 | CA   | PHE | 20 | 31.754 | 11.654 | 14.854 | 1.00 |   |
| 40.34      |     |      | C   |    |        |        |        |      |   |
| ATOM       | 235 | C    | PHE | 20 | 33.116 | 11.330 | 14.262 | 1.00 |   |
| 40.37      |     |      | C   |    |        |        |        |      |   |
| ATOM       | 236 | O    | PHE | 20 | 33.310 | 11.384 | 13.049 | 1.00 |   |

|            |     |     |     |    |        |        |        |      |
|------------|-----|-----|-----|----|--------|--------|--------|------|
| 66.02      |     |     | O   |    |        |        |        |      |
| ATOM       | 237 | CB  | PHE | 20 | 31.906 | 12.683 | 15.988 | 1.00 |
| 48.79      |     |     | C   |    |        |        |        |      |
| ATOM       | 238 | CG  | PHE | 20 | 32.126 | 11.987 | 17.323 | 1.00 |
| 35.75      |     |     | C   |    |        |        |        |      |
| ATOM       | 239 | CD1 | PHE | 20 | 31.096 | 11.228 | 17.918 | 1.00 |
| 30.20      |     |     | C   |    |        |        |        |      |
| ATOM       | 240 | CD2 | PHE | 20 | 33.355 | 12.117 | 17.983 | 1.00 |
| 40.95      |     |     | C   |    |        |        |        |      |
| ATOM       | 241 | CE1 | PHE | 20 | 31.306 | 10.609 | 19.152 | 1.00 |
| 30.41      |     |     | C   |    |        |        |        |      |
| ATOM       | 242 | CE2 | PHE | 20 | 33.561 | 11.493 | 19.219 | 1.00 |
| 45.84      |     |     | C   |    |        |        |        |      |
| ATOM       | 243 | CZ  | PHE | 20 | 32.537 | 10.740 | 19.802 | 1.00 |
| 40.81      |     |     | C   |    |        |        |        |      |
| ATOM       | 244 | HN  | PHE | 20 | 31.383 | 10.129 | 16.258 | 1.00 |
| 16.73      |     |     | H   |    |        |        |        |      |
| ATOM       | 245 | HA  | PHE | 20 | 31.130 | 12.080 | 14.077 | 1.00 |
| 59.91      |     |     | H   |    |        |        |        |      |
| ATOM       | 246 | HB1 | PHE | 20 | 31.020 | 13.266 | 16.044 | 1.00 |
| 67.15      |     |     | H   |    |        |        |        |      |
| ATOM       | 247 | HB2 | PHE | 20 | 32.743 | 13.337 | 15.781 | 1.00 |
| 58.17      |     |     | H   |    |        |        |        |      |
| ATOM       | 248 | HD1 | PHE | 20 | 30.141 | 11.113 | 17.421 | 1.00 |
| 33.34      |     |     | H   |    |        |        |        |      |
| ATOM       | 249 | HD2 | PHE | 20 | 34.147 | 12.697 | 17.536 | 1.00 |
| 49.35      |     |     | H   |    |        |        |        |      |
| ATOM       | 250 | HE1 | PHE | 20 | 30.517 | 10.029 | 19.602 | 1.00 |
| 30.61      |     |     | H   |    |        |        |        |      |
| ATOM       | 251 | HE2 | PHE | 20 | 34.511 | 11.593 | 19.722 | 1.00 |
| 61.27      |     |     | H   |    |        |        |        |      |
| ATOM       | 252 | HZ  | PHE | 20 | 32.696 | 10.260 | 20.757 | 1.00 |
| 52.66      |     |     | H   |    |        |        |        |      |
| ATOM       | 253 | N   | GLU | 21 | 34.063 | 11.026 | 15.137 | 1.00 |
| 41.31      |     |     | N   |    |        |        |        |      |
| ATOM       | 254 | CA  | GLU | 21 | 35.416 | 10.731 | 14.724 | 1.00 |
| 56.16      |     |     | C   |    |        |        |        |      |
| ATOM       | 255 | C   | GLU | 21 | 35.649 | 9.236  | 14.582 | 1.00 |
| 58.61      |     |     | C   |    |        |        |        |      |
| ATOM       | 256 | O   | GLU | 21 | 34.738 | 8.427  | 14.759 |      |
| 1.00201.19 |     |     | O   |    |        |        |        |      |
| ATOM       | 257 | CB  | GLU | 21 | 36.346 | 11.313 | 15.769 | 1.00 |
| 57.37      |     |     | C   |    |        |        |        |      |
| ATOM       | 258 | CG  | GLU | 21 | 36.204 | 10.534 | 17.078 |      |
| 1.00193.56 |     |     | C   |    |        |        |        |      |
| ATOM       | 259 | CD  | GLU | 21 | 36.891 | 11.291 | 18.210 |      |
| 1.00304.62 |     |     | C   |    |        |        |        |      |
| ATOM       | 260 | OE1 | GLU | 21 | 36.734 | 10.883 | 19.348 |      |
| 1.00451.81 |     |     | O   |    |        |        |        |      |
| ATOM       | 261 | OE2 | GLU | 21 | 37.564 | 12.266 | 17.921 |      |
| 1.00442.88 |     |     | O1- |    |        |        |        |      |
| ATOM       | 262 | HN  | GLU | 21 | 33.856 | 11.026 | 16.093 | 1.00 |

|            |     |     |     |     |        |        |        |      |  |
|------------|-----|-----|-----|-----|--------|--------|--------|------|--|
| 50.82      |     |     | H   |     |        |        |        |      |  |
| ATOM       | 263 | HA  | GLU | 21  | 35.622 | 11.212 | 13.778 | 1.00 |  |
| 85.72      |     |     | H   |     |        |        |        |      |  |
| ATOM       | 264 | HB1 | GLU | 21  | 36.068 | 12.339 | 15.936 | 1.00 |  |
| 46.37      |     |     | H   |     |        |        |        |      |  |
| ATOM       | 265 | HB2 | GLU | 21  | 37.360 | 11.261 | 15.421 |      |  |
| 1.00131.81 |     |     |     | H   |        |        |        |      |  |
| ATOM       | 266 | HG1 | GLU | 21  | 36.659 | 9.566  | 16.967 |      |  |
| 1.00314.91 |     |     |     | H   |        |        |        |      |  |
| ATOM       | 267 | HG2 | GLU | 21  | 35.159 | 10.409 | 17.309 |      |  |
| 1.00266.92 |     |     |     | H   |        |        |        |      |  |
| ATOM       | 268 | N   | GLY | 22  | 36.885 | 8.888  | 14.254 | 1.00 |  |
| 86.70      |     |     | N   |     |        |        |        |      |  |
| ATOM       | 269 | CA  | GLY | 22  | 37.270 | 7.485  | 14.074 |      |  |
| 1.00104.66 |     |     |     | C   |        |        |        |      |  |
| ATOM       | 270 | C   | GLY | 22  | 37.872 | 6.913  | 15.352 | 1.00 |  |
| 71.50      |     |     | C   |     |        |        |        |      |  |
| ATOM       | 271 | O   | GLY | 22  | 38.085 | 5.706  | 15.465 | 1.00 |  |
| 89.87      |     |     | O   |     |        |        |        |      |  |
| ATOM       | 272 | HN  | GLY | 22  | 37.555 | 9.595  | 14.132 |      |  |
| 1.00214.64 |     |     |     | H   |        |        |        |      |  |
| ATOM       | 273 | HA1 | GLY | 22  | 38.002 | 7.420  | 13.283 |      |  |
| 1.00152.47 |     |     |     | H   |        |        |        |      |  |
| ATOM       | 274 | HA2 | GLY | 22  | 36.401 | 6.904  | 13.798 |      |  |
| 1.00118.15 |     |     |     | H   |        |        |        |      |  |
| ATOM       | 275 | N   | ASP | 23  | 38.147 | 7.790  | 16.310 | 1.00 |  |
| 44.68      |     |     | N   |     |        |        |        |      |  |
| ATOM       | 276 | CA  | ASP | 23  | 38.732 | 7.370  | 17.578 | 1.00 |  |
| 43.33      |     |     | C   |     |        |        |        |      |  |
| ATOM       | 277 | C   | ASP | 23  | 37.819 | 6.387  | 18.301 | 1.00 |  |
| 37.55      |     |     | C   |     |        |        |        |      |  |
| ATOM       | 278 | O   | ASP | 23  | 38.277 | 5.381  | 18.841 | 1.00 |  |
| 61.37      |     |     | O   |     |        |        |        |      |  |
| ATOM       | 279 | CB  | ASP | 23  | 38.968 | 8.590  | 18.468 | 1.00 |  |
| 40.74      |     |     | C   |     |        |        |        |      |  |
| ATOM       | 280 | CG  | ASP | 23  | 39.750 | 8.184  | 19.713 |      |  |
| 1.00141.86 |     |     |     | C   |        |        |        |      |  |
| ATOM       | 281 | OD1 | ASP | 23  | 39.949 | 6.996  | 19.902 |      |  |
| 1.00328.18 |     |     |     | O   |        |        |        |      |  |
| ATOM       | 282 | OD2 | ASP | 23  | 40.137 | 9.068  | 20.460 |      |  |
| 1.00304.58 |     |     |     | O1- |        |        |        |      |  |
| ATOM       | 283 | HN  | ASP | 23  | 37.962 | 8.737  | 16.157 | 1.00 |  |
| 40.86      |     |     | H   |     |        |        |        |      |  |
| ATOM       | 284 | HA  | ASP | 23  | 39.677 | 6.892  | 17.386 | 1.00 |  |
| 72.12      |     |     | H   |     |        |        |        |      |  |
| ATOM       | 285 | HB1 | ASP | 23  | 38.015 | 9.002  | 18.766 | 1.00 |  |
| 94.15      |     |     | H   |     |        |        |        |      |  |
| ATOM       | 286 | HB2 | ASP | 23  | 39.525 | 9.335  | 17.919 | 1.00 |  |
| 93.26      |     |     | H   |     |        |        |        |      |  |
| ATOM       | 287 | N   | MET | 24  | 36.527 | 6.690  | 18.313 | 1.00 |  |
| 23.24      |     |     | N   |     |        |        |        |      |  |
| ATOM       | 288 | CA  | MET | 24  | 35.554 | 5.828  | 18.982 | 1.00 |  |

|            |     |      |     |    |        |        |        |      |  |
|------------|-----|------|-----|----|--------|--------|--------|------|--|
| 32.50      |     |      | C   |    |        |        |        |      |  |
| ATOM       | 289 | C    | MET | 24 | 34.145 | 6.080  | 18.451 | 1.00 |  |
| 25.13      |     |      | C   |    |        |        |        |      |  |
| ATOM       | 290 | O    | MET | 24 | 33.907 | 7.042  | 17.723 | 1.00 |  |
| 54.40      |     |      | O   |    |        |        |        |      |  |
| ATOM       | 291 | CB   | MET | 24 | 35.592 | 6.075  | 20.492 | 1.00 |  |
| 47.36      |     |      | C   |    |        |        |        |      |  |
| ATOM       | 292 | CG   | MET | 24 | 35.239 | 7.534  | 20.783 |      |  |
| 1.00151.73 |     |      |     | C  |        |        |        |      |  |
| ATOM       | 293 | SD   | MET | 24 | 35.402 | 7.850  | 22.558 |      |  |
| 1.00209.23 |     |      |     | S  |        |        |        |      |  |
| ATOM       | 294 | CE   | MET | 24 | 34.926 | 9.596  | 22.529 |      |  |
| 1.00243.29 |     |      |     | C  |        |        |        |      |  |
| ATOM       | 295 | HN   | MET | 24 | 36.224 | 7.507  | 17.869 | 1.00 |  |
| 17.32      |     |      | H   |    |        |        |        |      |  |
| ATOM       | 296 | HA   | MET | 24 | 35.816 | 4.797  | 18.794 | 1.00 |  |
| 48.94      |     |      | H   |    |        |        |        |      |  |
| ATOM       | 297 | HB1  | MET | 24 | 36.582 | 5.865  | 20.866 |      |  |
| 1.00124.40 |     |      |     | H  |        |        |        |      |  |
| ATOM       | 298 | HB2  | MET | 24 | 34.878 | 5.427  | 20.979 |      |  |
| 1.00166.96 |     |      |     | H  |        |        |        |      |  |
| ATOM       | 299 | HG1  | MET | 24 | 34.222 | 7.728  | 20.474 |      |  |
| 1.00331.71 |     |      |     | H  |        |        |        |      |  |
| ATOM       | 300 | HG2  | MET | 24 | 35.910 | 8.183  | 20.239 |      |  |
| 1.00302.30 |     |      |     | H  |        |        |        |      |  |
| ATOM       | 301 | HE1  | MET | 24 | 35.463 | 10.127 | 23.303 |      |  |
| 1.00340.44 |     |      |     | H  |        |        |        |      |  |
| ATOM       | 302 | HE2  | MET | 24 | 33.867 | 9.684  | 22.706 |      |  |
| 1.00373.88 |     |      |     | H  |        |        |        |      |  |
| ATOM       | 303 | HE3  | MET | 24 | 35.165 | 10.019 | 21.563 |      |  |
| 1.00386.81 |     |      |     | H  |        |        |        |      |  |
| ATOM       | 304 | N    | VAL | 25 | 33.215 | 5.197  | 18.822 | 1.00 |  |
| 22.44      |     |      | N   |    |        |        |        |      |  |
| ATOM       | 305 | CA   | VAL | 25 | 31.818 | 5.306  | 18.384 | 1.00 |  |
| 15.37      |     |      | C   |    |        |        |        |      |  |
| ATOM       | 306 | C    | VAL | 25 | 30.886 | 5.472  | 19.579 | 1.00 |  |
| 17.47      |     |      | C   |    |        |        |        |      |  |
| ATOM       | 307 | O    | VAL | 25 | 31.134 | 4.938  | 20.660 | 1.00 |  |
| 29.52      |     |      | O   |    |        |        |        |      |  |
| ATOM       | 308 | CB   | VAL | 25 | 31.420 | 4.056  | 17.591 | 1.00 |  |
| 23.36      |     |      | C   |    |        |        |        |      |  |
| ATOM       | 309 | CG1  | VAL | 25 | 29.910 | 4.079  | 17.296 | 1.00 |  |
| 58.39      |     |      | C   |    |        |        |        |      |  |
| ATOM       | 310 | CG2  | VAL | 25 | 32.205 | 4.027  | 16.274 | 1.00 |  |
| 55.25      |     |      | C   |    |        |        |        |      |  |
| ATOM       | 311 | HN   | VAL | 25 | 33.474 | 4.449  | 19.401 | 1.00 |  |
| 48.11      |     |      | H   |    |        |        |        |      |  |
| ATOM       | 312 | HA   | VAL | 25 | 31.708 | 6.175  | 17.740 | 1.00 |  |
| 9.25       |     |      | H   |    |        |        |        |      |  |
| ATOM       | 313 | HB   | VAL | 25 | 31.659 | 3.175  | 18.171 | 1.00 |  |
| 52.45      |     |      | H   |    |        |        |        |      |  |
| ATOM       | 314 | HG11 | VAL | 25 | 29.592 | 5.094  | 17.106 |      |  |

|            |     |      |     |   |    |        |       |        |      |  |
|------------|-----|------|-----|---|----|--------|-------|--------|------|--|
| 1.00171.07 |     |      |     | H |    |        |       |        |      |  |
| ATOM       | 315 | HG12 | VAL |   | 25 | 29.374 | 3.693 | 18.150 |      |  |
| 1.00166.22 |     |      |     | H |    |        |       |        |      |  |
| ATOM       | 316 | HG13 | VAL |   | 25 | 29.696 | 3.465 | 16.432 |      |  |
| 1.00134.76 |     |      |     | H |    |        |       |        |      |  |
| ATOM       | 317 | HG21 | VAL |   | 25 | 31.836 | 3.224 | 15.653 |      |  |
| 1.00141.88 |     |      |     | H |    |        |       |        |      |  |
| ATOM       | 318 | HG22 | VAL |   | 25 | 33.252 | 3.869 | 16.483 |      |  |
| 1.00184.50 |     |      |     | H |    |        |       |        |      |  |
| ATOM       | 319 | HG23 | VAL |   | 25 | 32.078 | 4.968 | 15.759 |      |  |
| 1.00133.90 |     |      |     | H |    |        |       |        |      |  |
| ATOM       | 320 | N    | THR |   | 26 | 29.816 | 6.238 | 19.370 | 1.00 |  |
| 13.60      |     |      | N   |   |    |        |       |        |      |  |
| ATOM       | 321 | CA   | THR |   | 26 | 28.833 | 6.513 | 20.418 | 1.00 |  |
| 21.19      |     |      | C   |   |    |        |       |        |      |  |
| ATOM       | 322 | C    | THR |   | 26 | 27.434 | 6.061 | 19.998 | 1.00 |  |
| 16.55      |     |      | C   |   |    |        |       |        |      |  |
| ATOM       | 323 | O    | THR |   | 26 | 27.020 | 6.269 | 18.858 | 1.00 |  |
| 11.43      |     |      | O   |   |    |        |       |        |      |  |
| ATOM       | 324 | CB   | THR |   | 26 | 28.821 | 8.014 | 20.695 | 1.00 |  |
| 27.07      |     |      | C   |   |    |        |       |        |      |  |
| ATOM       | 325 | CG2  | THR |   | 26 | 27.716 | 8.355 | 21.697 | 1.00 |  |
| 44.39      |     |      | C   |   |    |        |       |        |      |  |
| ATOM       | 326 | OG1  | THR |   | 26 | 30.082 | 8.401 | 21.221 | 1.00 |  |
| 34.75      |     |      | O   |   |    |        |       |        |      |  |
| ATOM       | 327 | HN   | THR |   | 26 | 29.689 | 6.641 | 18.486 | 1.00 |  |
| 10.81      |     |      | H   |   |    |        |       |        |      |  |
| ATOM       | 328 | HA   | THR |   | 26 | 29.110 | 5.995 | 21.327 | 1.00 |  |
| 33.16      |     |      | H   |   |    |        |       |        |      |  |
| ATOM       | 329 | HB   | THR |   | 26 | 28.641 | 8.539 | 19.766 | 1.00 |  |
| 20.60      |     |      | H   |   |    |        |       |        |      |  |
| ATOM       | 330 | HG1  | THR |   | 26 | 30.508 | 7.618 | 21.578 | 1.00 |  |
| 77.72      |     |      | H   |   |    |        |       |        |      |  |
| ATOM       | 331 | HG21 | THR |   | 26 | 27.854 | 9.365 | 22.053 |      |  |
| 1.00126.99 |     |      |     | H |    |        |       |        |      |  |
| ATOM       | 332 | HG22 | THR |   | 26 | 27.763 | 7.670 | 22.530 |      |  |
| 1.00108.32 |     |      |     | H |    |        |       |        |      |  |
| ATOM       | 333 | HG23 | THR |   | 26 | 26.753 | 8.270 | 21.215 |      |  |
| 1.00151.99 |     |      |     | H |    |        |       |        |      |  |
| ATOM       | 334 | N    | ARG |   | 27 | 26.706 | 5.449 | 20.933 | 1.00 |  |
| 22.38      |     |      | N   |   |    |        |       |        |      |  |
| ATOM       | 335 | CA   | ARG |   | 27 | 25.347 | 4.978 | 20.661 | 1.00 |  |
| 20.21      |     |      | C   |   |    |        |       |        |      |  |
| ATOM       | 336 | C    | ARG |   | 27 | 24.507 | 5.004 | 21.936 | 1.00 |  |
| 16.96      |     |      | C   |   |    |        |       |        |      |  |
| ATOM       | 337 | O    | ARG |   | 27 | 25.046 | 4.996 | 23.041 | 1.00 |  |
| 20.06      |     |      | O   |   |    |        |       |        |      |  |
| ATOM       | 338 | CB   | ARG |   | 27 | 25.392 | 3.555 | 20.096 | 1.00 |  |
| 22.14      |     |      | C   |   |    |        |       |        |      |  |
| ATOM       | 339 | CG   | ARG |   | 27 | 25.966 | 2.600 | 21.146 |      |  |
| 1.00124.30 |     |      |     | C |    |        |       |        |      |  |
| ATOM       | 340 | CD   | ARG |   | 27 | 26.165 | 1.218 | 20.523 |      |  |

|            |     |      |     |     |        |        |        |      |  |
|------------|-----|------|-----|-----|--------|--------|--------|------|--|
| 1.00109.38 |     |      |     | C   |        |        |        |      |  |
| ATOM       | 341 | NE   | ARG | 27  | 26.701 | 0.291  | 21.514 |      |  |
| 1.00227.73 |     |      |     | N   |        |        |        |      |  |
| ATOM       | 342 | CZ   | ARG | 27  | 27.040 | -0.950 | 21.179 |      |  |
| 1.00426.12 |     |      |     | C   |        |        |        |      |  |
| ATOM       | 343 | NH1  | ARG | 27  | 27.519 | -1.760 | 22.083 |      |  |
| 1.00767.09 |     |      |     | N1+ |        |        |        |      |  |
| ATOM       | 344 | NH2  | ARG | 27  | 26.896 | -1.356 | 19.949 |      |  |
| 1.00581.78 |     |      |     | N   |        |        |        |      |  |
| ATOM       | 345 | HN   | ARG | 27  | 27.088 | 5.318  | 21.826 | 1.00 |  |
| 30.75      |     |      |     | H   |        |        |        |      |  |
| ATOM       | 346 | HA   | ARG | 27  | 24.888 | 5.629  | 19.933 | 1.00 |  |
| 23.13      |     |      |     | H   |        |        |        |      |  |
| ATOM       | 347 | HB1  | ARG | 27  | 26.018 | 3.537  | 19.216 | 1.00 |  |
| 87.46      |     |      |     | H   |        |        |        |      |  |
| ATOM       | 348 | HB2  | ARG | 27  | 24.392 | 3.242  | 19.833 |      |  |
| 1.00103.36 |     |      |     | H   |        |        |        |      |  |
| ATOM       | 349 | HG1  | ARG | 27  | 25.281 | 2.522  | 21.976 |      |  |
| 1.00281.97 |     |      |     | H   |        |        |        |      |  |
| ATOM       | 350 | HG2  | ARG | 27  | 26.915 | 2.978  | 21.496 |      |  |
| 1.00276.19 |     |      |     | H   |        |        |        |      |  |
| ATOM       | 351 | HD1  | ARG | 27  | 26.852 | 1.296  | 19.693 |      |  |
| 1.00183.60 |     |      |     | H   |        |        |        |      |  |
| ATOM       | 352 | HD2  | ARG | 27  | 25.216 | 0.847  | 20.166 |      |  |
| 1.00142.93 |     |      |     | H   |        |        |        |      |  |
| ATOM       | 353 | HE   | ARG | 27  | 26.813 | 0.589  | 22.440 |      |  |
| 1.00372.53 |     |      |     | H   |        |        |        |      |  |
| ATOM       | 354 | HH11 | ARG | 27  | 27.629 | -1.448 | 23.027 |      |  |
| 1.00910.59 |     |      |     | H   |        |        |        |      |  |
| ATOM       | 355 | HH12 | ARG | 27  | 27.774 | -2.694 | 21.833 |      |  |
| 1.00999.99 |     |      |     | H   |        |        |        |      |  |
| ATOM       | 356 | HH21 | ARG | 27  | 26.530 | -0.735 | 19.256 |      |  |
| 1.00532.54 |     |      |     | H   |        |        |        |      |  |
| ATOM       | 357 | HH22 | ARG | 27  | 27.152 | -2.290 | 19.698 |      |  |
| 1.00948.84 |     |      |     | H   |        |        |        |      |  |
| ATOM       | 358 | N    | SER | 28  | 23.180 | 5.044  | 21.777 | 1.00 |  |
| 14.60      |     |      |     | N   |        |        |        |      |  |
| ATOM       | 359 | CA   | SER | 28  | 22.277 | 5.080  | 22.932 | 1.00 |  |
| 14.92      |     |      |     | C   |        |        |        |      |  |
| ATOM       | 360 | C    | SER | 28  | 21.025 | 4.246  | 22.676 | 1.00 |  |
| 12.12      |     |      |     | C   |        |        |        |      |  |
| ATOM       | 361 | O    | SER | 28  | 20.610 | 4.059  | 21.532 | 1.00 |  |
| 13.41      |     |      |     | O   |        |        |        |      |  |
| ATOM       | 362 | CB   | SER | 28  | 21.874 | 6.525  | 23.228 | 1.00 |  |
| 23.26      |     |      |     | C   |        |        |        |      |  |
| ATOM       | 363 | OG   | SER | 28  | 23.037 | 7.282  | 23.538 |      |  |
| 1.00146.32 |     |      |     | O   |        |        |        |      |  |
| ATOM       | 364 | HN   | SER | 28  | 22.799 | 5.053  | 20.871 | 1.00 |  |
| 15.23      |     |      |     | H   |        |        |        |      |  |
| ATOM       | 365 | HA   | SER | 28  | 22.787 | 4.680  | 23.797 | 1.00 |  |
| 15.44      |     |      |     | H   |        |        |        |      |  |
| ATOM       | 366 | HB1  | SER | 28  | 21.187 | 6.542  | 24.064 | 1.00 |  |

|            |     |     |     |    |        |       |        |      |  |
|------------|-----|-----|-----|----|--------|-------|--------|------|--|
| 88.73      |     |     | H   |    |        |       |        |      |  |
| ATOM       | 367 | HB2 | SER | 28 | 21.393 | 6.952 | 22.364 |      |  |
| 1.00124.68 |     |     |     |    |        |       |        | H    |  |
| ATOM       | 368 | HG  | SER | 28 | 22.931 | 7.638 | 24.423 |      |  |
| 1.00242.47 |     |     |     |    |        |       |        | H    |  |
| ATOM       | 369 | N   | CYS | 29 | 20.423 | 3.759 | 23.757 | 1.00 |  |
| 10.48      |     |     | N   |    |        |       |        |      |  |
| ATOM       | 370 | CA  | CYS | 29 | 19.210 | 2.955 | 23.657 | 1.00 |  |
| 9.97       |     |     | C   |    |        |       |        |      |  |
| ATOM       | 371 | C   | CYS | 29 | 18.574 | 2.811 | 25.040 | 1.00 |  |
| 11.60      |     |     | C   |    |        |       |        |      |  |
| ATOM       | 372 | O   | CYS | 29 | 19.206 | 2.314 | 25.972 | 1.00 |  |
| 15.64      |     |     | O   |    |        |       |        |      |  |
| ATOM       | 373 | CB  | CYS | 29 | 19.537 | 1.572 | 23.068 | 1.00 |  |
| 9.52       |     |     | C   |    |        |       |        |      |  |
| ATOM       | 374 | SG  | CYS | 29 | 18.113 | 0.948 | 22.160 | 1.00 |  |
| 10.40      |     |     | S   |    |        |       |        |      |  |
| ATOM       | 375 | HN  | CYS | 29 | 20.796 | 3.953 | 24.641 | 1.00 |  |
| 11.10      |     |     | H   |    |        |       |        |      |  |
| ATOM       | 376 | HA  | CYS | 29 | 18.513 | 3.459 | 23.005 | 1.00 |  |
| 11.08      |     |     | H   |    |        |       |        |      |  |
| ATOM       | 377 | HB1 | CYS | 29 | 19.778 | 0.874 | 23.860 | 1.00 |  |
| 9.33       |     |     | H   |    |        |       |        |      |  |
| ATOM       | 378 | HB2 | CYS | 29 | 20.375 | 1.651 | 22.397 | 1.00 |  |
| 10.78      |     |     | H   |    |        |       |        |      |  |
| ATOM       | 379 | N   | GLU | 30 | 17.329 | 3.261 | 25.173 | 1.00 |  |
| 13.52      |     |     | N   |    |        |       |        |      |  |
| ATOM       | 380 | CA  | GLU | 30 | 16.631 | 3.188 | 26.456 | 1.00 |  |
| 17.41      |     |     | C   |    |        |       |        |      |  |
| ATOM       | 381 | C   | GLU | 30 | 15.989 | 1.822 | 26.662 | 1.00 |  |
| 10.81      |     |     | C   |    |        |       |        |      |  |
| ATOM       | 382 | O   | GLU | 30 | 15.677 | 1.117 | 25.703 | 1.00 |  |
| 23.22      |     |     | O   |    |        |       |        |      |  |
| ATOM       | 383 | CB  | GLU | 30 | 15.552 | 4.270 | 26.528 | 1.00 |  |
| 37.83      |     |     | C   |    |        |       |        |      |  |
| ATOM       | 384 | CG  | GLU | 30 | 16.202 | 5.647 | 26.410 |      |  |
| 1.00108.13 |     |     |     |    |        |       |        | C    |  |
| ATOM       | 385 | CD  | GLU | 30 | 17.066 | 5.925 | 27.636 |      |  |
| 1.00240.52 |     |     |     |    |        |       |        | C    |  |
| ATOM       | 386 | OE1 | GLU | 30 | 16.858 | 5.268 | 28.643 |      |  |
| 1.00422.56 |     |     |     |    |        |       |        | O    |  |
| ATOM       | 387 | OE2 | GLU | 30 | 17.922 | 6.790 | 27.550 |      |  |
| 1.00410.81 |     |     |     |    |        |       |        | O1-  |  |
| ATOM       | 388 | HN  | GLU | 30 | 16.873 | 3.657 | 24.398 | 1.00 |  |
| 15.61      |     |     | H   |    |        |       |        |      |  |
| ATOM       | 389 | HA  | GLU | 30 | 17.341 | 3.360 | 27.252 | 1.00 |  |
| 24.60      |     |     | H   |    |        |       |        |      |  |
| ATOM       | 390 | HB1 | GLU | 30 | 15.033 | 4.198 | 27.472 | 1.00 |  |
| 72.67      |     |     | H   |    |        |       |        |      |  |
| ATOM       | 391 | HB2 | GLU | 30 | 14.849 | 4.131 | 25.719 | 1.00 |  |
| 56.47      |     |     | H   |    |        |       |        |      |  |
| ATOM       | 392 | HG1 | GLU | 30 | 15.433 | 6.401 | 26.338 |      |  |

|            |     |     |     |     |    |        |        |        |      |
|------------|-----|-----|-----|-----|----|--------|--------|--------|------|
| 1.00196.66 |     |     |     | H   |    |        |        |        |      |
| ATOM       | 393 | HG2 | GLU |     | 30 | 16.818 | 5.677  | 25.524 |      |
| 1.00140.67 |     |     |     | H   |    |        |        |        |      |
| ATOM       | 394 | N   | LYS |     | 31 | 15.790 | 1.461  | 27.931 | 1.00 |
| 11.96      |     |     | N   |     |    |        |        |        |      |
| ATOM       | 395 | CA  | LYS |     | 31 | 15.175 | 0.181  | 28.288 | 1.00 |
| 11.40      |     |     | C   |     |    |        |        |        |      |
| ATOM       | 396 | C   | LYS |     | 31 | 13.865 | 0.419  | 29.029 | 1.00 |
| 10.99      |     |     | C   |     |    |        |        |        |      |
| ATOM       | 397 | O   | LYS |     | 31 | 13.747 | 1.365  | 29.809 | 1.00 |
| 12.86      |     |     | O   |     |    |        |        |        |      |
| ATOM       | 398 | CB  | LYS |     | 31 | 16.122 | -0.623 | 29.179 | 1.00 |
| 21.40      |     |     | C   |     |    |        |        |        |      |
| ATOM       | 399 | CG  | LYS |     | 31 | 17.395 | -0.960 | 28.400 | 1.00 |
| 57.81      |     |     | C   |     |    |        |        |        |      |
| ATOM       | 400 | CD  | LYS |     | 31 | 18.341 | -1.766 | 29.292 |      |
| 1.00115.52 |     |     |     | C   |    |        |        |        |      |
| ATOM       | 401 | CE  | LYS |     | 31 | 19.615 | -2.099 | 28.514 |      |
| 1.00250.23 |     |     |     | C   |    |        |        |        |      |
| ATOM       | 402 | NZ  | LYS |     | 31 | 20.541 | -2.873 | 29.386 |      |
| 1.00462.10 |     |     |     | N1+ |    |        |        |        |      |
| ATOM       | 403 | HN  | LYS |     | 31 | 16.057 | 2.075  | 28.647 | 1.00 |
| 26.13      |     |     | H   |     |    |        |        |        |      |
| ATOM       | 404 | HA  | LYS |     | 31 | 14.973 | -0.390 | 27.392 | 1.00 |
| 13.87      |     |     | H   |     |    |        |        |        |      |
| ATOM       | 405 | HB1 | LYS |     | 31 | 15.638 | -1.538 | 29.488 | 1.00 |
| 37.63      |     |     | H   |     |    |        |        |        |      |
| ATOM       | 406 | HB2 | LYS |     | 31 | 16.376 | -0.039 | 30.052 | 1.00 |
| 47.19      |     |     | H   |     |    |        |        |        |      |
| ATOM       | 407 | HG1 | LYS |     | 31 | 17.882 | -0.047 | 28.094 |      |
| 1.00126.32 |     |     |     | H   |    |        |        |        |      |
| ATOM       | 408 | HG2 | LYS |     | 31 | 17.137 | -1.544 | 27.528 |      |
| 1.00114.19 |     |     |     | H   |    |        |        |        |      |
| ATOM       | 409 | HD1 | LYS |     | 31 | 17.858 | -2.681 | 29.597 |      |
| 1.00198.45 |     |     |     | H   |    |        |        |        |      |
| ATOM       | 410 | HD2 | LYS |     | 31 | 18.595 | -1.183 | 30.166 |      |
| 1.00200.14 |     |     |     | H   |    |        |        |        |      |
| ATOM       | 411 | HE1 | LYS |     | 31 | 20.095 | -1.184 | 28.200 |      |
| 1.00374.64 |     |     |     | H   |    |        |        |        |      |
| ATOM       | 412 | HE2 | LYS |     | 31 | 19.361 | -2.688 | 27.644 |      |
| 1.00403.27 |     |     |     | H   |    |        |        |        |      |
| ATOM       | 413 | HZ1 | LYS |     | 31 | 20.328 | -3.888 | 29.304 |      |
| 1.00627.38 |     |     |     | H   |    |        |        |        |      |
| ATOM       | 414 | HZ2 | LYS |     | 31 | 20.420 | -2.571 | 30.374 |      |
| 1.00622.26 |     |     |     | H   |    |        |        |        |      |
| ATOM       | 415 | HZ3 | LYS |     | 31 | 21.523 | -2.703 | 29.088 |      |
| 1.00619.20 |     |     |     | H   |    |        |        |        |      |
| ATOM       | 416 | N   | THR |     | 32 | 12.881 | -0.438 | 28.779 | 1.00 |
| 15.51      |     |     | N   |     |    |        |        |        |      |
| ATOM       | 417 | CA  | THR |     | 32 | 11.584 | -0.301 | 29.430 | 1.00 |
| 22.44      |     |     | C   |     |    |        |        |        |      |
| ATOM       | 418 | C   | THR |     | 32 | 11.638 | -0.833 | 30.858 | 1.00 |



|            |     |      |     |    |        |        |        |      |  |
|------------|-----|------|-----|----|--------|--------|--------|------|--|
| 26.60      |     |      | C   |    |        |        |        |      |  |
| ATOM       | 419 | O    | THR | 32 | 12.000 | -1.986 | 31.092 | 1.00 |  |
| 57.43      |     |      | O   |    |        |        |        |      |  |
| ATOM       | 420 | CB   | THR | 32 | 10.519 | -1.065 | 28.635 | 1.00 |  |
| 56.28      |     |      | C   |    |        |        |        |      |  |
| ATOM       | 421 | CG2  | THR | 32 | 9.161  | -0.929 | 29.329 |      |  |
| 1.00102.70 |     |      |     | C  |        |        |        |      |  |
| ATOM       | 422 | OG1  | THR | 32 | 10.438 | -0.528 | 27.322 |      |  |
| 1.00111.17 |     |      |     | O  |        |        |        |      |  |
| ATOM       | 423 | HN   | THR | 32 | 13.031 | -1.170 | 28.146 | 1.00 |  |
| 18.79      |     |      | H   |    |        |        |        |      |  |
| ATOM       | 424 | HA   | THR | 32 | 11.313 | 0.743  | 29.456 | 1.00 |  |
| 19.67      |     |      | H   |    |        |        |        |      |  |
| ATOM       | 425 | HB   | THR | 32 | 10.788 | -2.107 | 28.581 | 1.00 |  |
| 84.25      |     |      | H   |    |        |        |        |      |  |
| ATOM       | 426 | HG1  | THR | 32 | 9.933  | 0.287  | 27.365 |      |  |
| 1.00205.03 |     |      |     | H  |        |        |        |      |  |
| ATOM       | 427 | HG21 | THR | 32 | 9.183  | -1.452 | 30.273 |      |  |
| 1.00220.71 |     |      |     | H  |        |        |        |      |  |
| ATOM       | 428 | HG22 | THR | 32 | 8.394  | -1.357 | 28.701 |      |  |
| 1.00174.67 |     |      |     | H  |        |        |        |      |  |
| ATOM       | 429 | HG23 | THR | 32 | 8.947  | 0.115  | 29.500 |      |  |
| 1.00217.44 |     |      |     | H  |        |        |        |      |  |
| ATOM       | 430 | N    | THR | 33 | 11.266 | 0.018  | 31.810 | 1.00 |  |
| 22.47      |     |      | N   |    |        |        |        |      |  |
| ATOM       | 431 | CA   | THR | 33 | 11.265 | -0.365 | 33.220 | 1.00 |  |
| 41.60      |     |      | C   |    |        |        |        |      |  |
| ATOM       | 432 | C    | THR | 33 | 10.247 | 0.438  | 33.984 | 1.00 |  |
| 38.03      |     |      | C   |    |        |        |        |      |  |
| ATOM       | 433 | O    | THR | 33 | 10.548 | 1.495  | 34.540 | 1.00 |  |
| 52.73      |     |      | O   |    |        |        |        |      |  |
| ATOM       | 434 | CB   | THR | 33 | 12.652 | -0.166 | 33.836 | 1.00 |  |
| 63.25      |     |      | C   |    |        |        |        |      |  |
| ATOM       | 435 | CG2  | THR | 33 | 13.633 | -1.174 | 33.234 |      |  |
| 1.00121.65 |     |      |     | C  |        |        |        |      |  |
| ATOM       | 436 | OG1  | THR | 33 | 13.101 | 1.155  | 33.570 | 1.00 |  |
| 96.20      |     |      | O   |    |        |        |        |      |  |
| ATOM       | 437 | HN   | THR | 33 | 10.982 | 0.922  | 31.560 | 1.00 |  |
| 23.82      |     |      | H   |    |        |        |        |      |  |
| ATOM       | 438 | HA   | THR | 33 | 10.982 | -1.396 | 33.313 | 1.00 |  |
| 67.12      |     |      | H   |    |        |        |        |      |  |
| ATOM       | 439 | HB   | THR | 33 | 12.594 | -0.319 | 34.903 |      |  |
| 1.00107.59 |     |      |     | H  |        |        |        |      |  |
| ATOM       | 440 | HG1  | THR | 33 | 13.670 | 1.124  | 32.797 |      |  |
| 1.00176.27 |     |      |     | H  |        |        |        |      |  |
| ATOM       | 441 | HG21 | THR | 33 | 13.865 | -0.888 | 32.219 |      |  |
| 1.00255.23 |     |      |     | H  |        |        |        |      |  |
| ATOM       | 442 | HG22 | THR | 33 | 13.190 | -2.158 | 33.240 |      |  |
| 1.00245.37 |     |      |     | H  |        |        |        |      |  |
| ATOM       | 443 | HG23 | THR | 33 | 14.541 | -1.184 | 33.821 |      |  |
| 1.00185.78 |     |      |     | H  |        |        |        |      |  |
| ATOM       | 444 | N    | GLY | 34 | 9.037  | -0.090 | 34.022 | 1.00 |  |

|            |     |      |     |    |        |        |        |      |   |
|------------|-----|------|-----|----|--------|--------|--------|------|---|
| 40.93      |     |      | N   |    |        |        |        |      |   |
| ATOM       | 445 | CA   | GLY | 34 | 7.973  | 0.564  | 34.740 | 1.00 |   |
| 45.59      |     |      | C   |    |        |        |        |      |   |
| ATOM       | 446 | C    | GLY | 34 | 7.494  | 1.809  | 34.003 | 1.00 |   |
| 40.97      |     |      | C   |    |        |        |        |      |   |
| ATOM       | 447 | O    | GLY | 34 | 6.298  | 2.096  | 33.962 | 1.00 |   |
| 82.17      |     |      | O   |    |        |        |        |      |   |
| ATOM       | 448 | HN   | GLY | 34 | 8.865  | -0.944 | 33.572 | 1.00 |   |
| 54.00      |     |      | H   |    |        |        |        |      |   |
| ATOM       | 449 | HA1  | GLY | 34 | 8.353  | 0.841  | 35.703 | 1.00 |   |
| 54.41      |     |      | H   |    |        |        |        |      |   |
| ATOM       | 450 | HA2  | GLY | 34 | 7.148  | -0.125 | 34.863 | 1.00 |   |
| 62.09      |     |      | H   |    |        |        |        |      |   |
| ATOM       | 451 | N    | ASN | 35 | 8.439  | 2.545  | 33.416 | 1.00 |   |
| 32.51      |     |      | N   |    |        |        |        |      |   |
| ATOM       | 452 | CA   | ASN | 35 | 8.115  | 3.764  | 32.670 | 1.00 |   |
| 33.20      |     |      | C   |    |        |        |        |      |   |
| ATOM       | 453 | C    | ASN | 35 | 8.891  | 3.805  | 31.357 | 1.00 |   |
| 23.17      |     |      | C   |    |        |        |        |      |   |
| ATOM       | 454 | O    | ASN | 35 | 10.057 | 3.415  | 31.300 | 1.00 |   |
| 27.01      |     |      | O   |    |        |        |        |      |   |
| ATOM       | 455 | CB   | ASN | 35 | 8.467  | 4.997  | 33.504 | 1.00 |   |
| 54.51      |     |      | C   |    |        |        |        |      |   |
| ATOM       | 456 | CG   | ASN | 35 | 7.670  | 4.994  | 34.805 | 1.00 |   |
| 80.73      |     |      | C   |    |        |        |        |      |   |
| ATOM       | 457 | ND2  | ASN | 35 | 8.265  | 5.309  | 35.924 |      |   |
| 1.00220.46 |     |      |     |    |        |        |        |      | N |
| ATOM       | 458 | OD1  | ASN | 35 | 6.476  | 4.698  | 34.803 |      |   |
| 1.00117.80 |     |      |     |    |        |        |        |      | O |
| ATOM       | 459 | HN   | ASN | 35 | 9.375  | 2.261  | 33.483 | 1.00 |   |
| 51.15      |     |      | H   |    |        |        |        |      |   |
| ATOM       | 460 | HA   | ASN | 35 | 7.057  | 3.783  | 32.449 | 1.00 |   |
| 47.21      |     |      | H   |    |        |        |        |      |   |
| ATOM       | 461 | HB1  | ASN | 35 | 8.228  | 5.887  | 32.942 | 1.00 |   |
| 68.31      |     |      | H   |    |        |        |        |      |   |
| ATOM       | 462 | HB2  | ASN | 35 | 9.524  | 4.987  | 33.731 | 1.00 |   |
| 57.75      |     |      | H   |    |        |        |        |      |   |
| ATOM       | 463 | HD21 | ASN | 35 | 9.216  | 5.545  | 35.923 |      |   |
| 1.00405.39 |     |      |     |    |        |        |        |      | H |
| ATOM       | 464 | HD22 | ASN | 35 | 7.760  | 5.310  | 36.764 |      |   |
| 1.00245.64 |     |      |     |    |        |        |        |      | H |
| ATOM       | 465 | N    | PHE | 36 | 8.233  | 4.279  | 30.302 | 1.00 |   |
| 35.72      |     |      | N   |    |        |        |        |      |   |
| ATOM       | 466 | CA   | PHE | 36 | 8.853  | 4.370  | 28.989 | 1.00 |   |
| 33.41      |     |      | C   |    |        |        |        |      |   |
| ATOM       | 467 | C    | PHE | 36 | 9.538  | 5.722  | 28.812 | 1.00 |   |
| 28.51      |     |      | C   |    |        |        |        |      |   |
| ATOM       | 468 | O    | PHE | 36 | 9.066  | 6.737  | 29.325 | 1.00 |   |
| 45.23      |     |      | O   |    |        |        |        |      |   |
| ATOM       | 469 | CB   | PHE | 36 | 7.774  | 4.208  | 27.924 | 1.00 |   |
| 67.53      |     |      | C   |    |        |        |        |      |   |
| ATOM       | 470 | CG   | PHE | 36 | 7.172  | 2.827  | 28.015 | 1.00 |   |

|            |     |      |     |    |        |        |        |      |  |
|------------|-----|------|-----|----|--------|--------|--------|------|--|
| 86.71      |     |      | C   |    |        |        |        |      |  |
| ATOM       | 471 | CD1  | PHE | 36 | 6.068  | 2.602  | 28.846 |      |  |
| 1.00106.51 |     |      | C   |    |        |        |        |      |  |
| ATOM       | 472 | CD2  | PHE | 36 | 7.712  | 1.772  | 27.268 | 1.00 |  |
| 99.48      |     |      | C   |    |        |        |        |      |  |
| ATOM       | 473 | CE1  | PHE | 36 | 5.502  | 1.324  | 28.929 |      |  |
| 1.00134.48 |     |      | C   |    |        |        |        |      |  |
| ATOM       | 474 | CE2  | PHE | 36 | 7.147  | 0.494  | 27.352 |      |  |
| 1.00134.27 |     |      | C   |    |        |        |        |      |  |
| ATOM       | 475 | CZ   | PHE | 36 | 6.041  | 0.271  | 28.182 |      |  |
| 1.00149.48 |     |      | C   |    |        |        |        |      |  |
| ATOM       | 476 | HN   | PHE | 36 | 7.306  | 4.573  | 30.406 | 1.00 |  |
| 62.87      |     |      | H   |    |        |        |        |      |  |
| ATOM       | 477 | HA   | PHE | 36 | 9.582  | 3.581  | 28.875 | 1.00 |  |
| 28.53      |     |      | H   |    |        |        |        |      |  |
| ATOM       | 478 | HB1  | PHE | 36 | 8.209  | 4.346  | 26.953 | 1.00 |  |
| 73.56      |     |      | H   |    |        |        |        |      |  |
| ATOM       | 479 | HB2  | PHE | 36 | 7.002  | 4.948  | 28.080 | 1.00 |  |
| 88.42      |     |      | H   |    |        |        |        |      |  |
| ATOM       | 480 | HD1  | PHE | 36 | 5.653  | 3.416  | 29.424 |      |  |
| 1.00110.20 |     |      | H   |    |        |        |        |      |  |
| ATOM       | 481 | HD2  | PHE | 36 | 8.565  | 1.943  | 26.629 | 1.00 |  |
| 93.07      |     |      | H   |    |        |        |        |      |  |
| ATOM       | 482 | HE1  | PHE | 36 | 4.650  | 1.152  | 29.570 |      |  |
| 1.00155.06 |     |      | H   |    |        |        |        |      |  |
| ATOM       | 483 | HE2  | PHE | 36 | 7.561  | -0.318 | 26.775 |      |  |
| 1.00159.46 |     |      | H   |    |        |        |        |      |  |
| ATOM       | 484 | HZ   | PHE | 36 | 5.604  | -0.715 | 28.246 |      |  |
| 1.00183.25 |     |      | H   |    |        |        |        |      |  |
| ATOM       | 485 | N    | THR | 37 | 10.648 | 5.735  | 28.073 | 1.00 |  |
| 20.06      |     |      | N   |    |        |        |        |      |  |
| ATOM       | 486 | CA   | THR | 37 | 11.390 | 6.958  | 27.819 | 1.00 |  |
| 27.18      |     |      | C   |    |        |        |        |      |  |
| ATOM       | 487 | C    | THR | 37 | 11.717 | 7.055  | 26.338 | 1.00 |  |
| 41.87      |     |      | C   |    |        |        |        |      |  |
| ATOM       | 488 | O    | THR | 37 | 11.039 | 6.463  | 25.496 |      |  |
| 1.00169.86 |     |      | O   |    |        |        |        |      |  |
| ATOM       | 489 | CB   | THR | 37 | 12.685 | 6.966  | 28.633 | 1.00 |  |
| 26.52      |     |      | C   |    |        |        |        |      |  |
| ATOM       | 490 | CG2  | THR | 37 | 12.367 | 6.693  | 30.104 | 1.00 |  |
| 75.69      |     |      | C   |    |        |        |        |      |  |
| ATOM       | 491 | OG1  | THR | 37 | 13.559 | 5.960  | 28.139 | 1.00 |  |
| 81.95      |     |      | O   |    |        |        |        |      |  |
| ATOM       | 492 | HN   | THR | 37 | 10.978 | 4.906  | 27.682 | 1.00 |  |
| 18.47      |     |      | H   |    |        |        |        |      |  |
| ATOM       | 493 | HA   | THR | 37 | 10.792 | 7.815  | 28.102 | 1.00 |  |
| 38.80      |     |      | H   |    |        |        |        |      |  |
| ATOM       | 494 | HB   | THR | 37 | 13.161 | 7.930  | 28.546 | 1.00 |  |
| 81.60      |     |      | H   |    |        |        |        |      |  |
| ATOM       | 495 | HG1  | THR | 37 | 14.039 | 5.591  | 28.884 |      |  |
| 1.00188.80 |     |      | H   |    |        |        |        |      |  |
| ATOM       | 496 | HG21 | THR | 37 | 11.554 | 7.328  | 30.420 |      |  |

|            |     |      |     |     |    |        |        |        |      |
|------------|-----|------|-----|-----|----|--------|--------|--------|------|
| 1.00196.98 |     |      |     | H   |    |        |        |        |      |
| ATOM       | 497 | HG22 | THR |     | 37 | 13.240 | 6.899  | 30.705 |      |
| 1.00196.23 |     |      |     | H   |    |        |        |        |      |
| ATOM       | 498 | HG23 | THR |     | 37 | 12.083 | 5.657  | 30.225 |      |
| 1.00168.92 |     |      |     | H   |    |        |        |        |      |
| ATOM       | 499 | N    | GLU |     | 38 | 12.759 | 7.805  | 26.032 | 1.00 |
| 26.53      |     |      |     | N   |    |        |        |        |      |
| ATOM       | 500 | CA   | GLU |     | 38 | 13.196 | 7.994  | 24.648 | 1.00 |
| 30.29      |     |      |     | C   |    |        |        |        |      |
| ATOM       | 501 | C    | GLU |     | 38 | 14.708 | 8.180  | 24.582 | 1.00 |
| 25.39      |     |      |     | C   |    |        |        |        |      |
| ATOM       | 502 | O    | GLU |     | 38 | 15.327 | 8.650  | 25.536 | 1.00 |
| 51.60      |     |      |     | O   |    |        |        |        |      |
| ATOM       | 503 | CB   | GLU |     | 38 | 12.517 | 9.228  | 24.040 | 1.00 |
| 54.82      |     |      |     | C   |    |        |        |        |      |
| ATOM       | 504 | CG   | GLU |     | 38 | 11.010 | 8.988  | 23.908 |      |
| 1.00165.84 |     |      |     | C   |    |        |        |        |      |
| ATOM       | 505 | CD   | GLU |     | 38 | 10.353 | 10.186 | 23.228 |      |
| 1.00292.92 |     |      |     | C   |    |        |        |        |      |
| ATOM       | 506 | OE1  | GLU |     | 38 | 9.165  | 10.113 | 22.963 |      |
| 1.00414.19 |     |      |     | O   |    |        |        |        |      |
| ATOM       | 507 | OE2  | GLU |     | 38 | 11.049 | 11.157 | 22.984 |      |
| 1.00537.65 |     |      |     | O1- |    |        |        |        |      |
| ATOM       | 508 | HN   | GLU |     | 38 | 13.248 | 8.235  | 26.756 | 1.00 |
| 84.50      |     |      |     | H   |    |        |        |        |      |
| ATOM       | 509 | HA   | GLU |     | 38 | 12.926 | 7.125  | 24.065 | 1.00 |
| 32.15      |     |      |     | H   |    |        |        |        |      |
| ATOM       | 510 | HB1  | GLU |     | 38 | 12.934 | 9.422  | 23.064 |      |
| 1.00144.82 |     |      |     | H   |    |        |        |        |      |
| ATOM       | 511 | HB2  | GLU |     | 38 | 12.688 | 10.082 | 24.679 |      |
| 1.00106.49 |     |      |     | H   |    |        |        |        |      |
| ATOM       | 512 | HG1  | GLU |     | 38 | 10.579 | 8.859  | 24.887 |      |
| 1.00303.31 |     |      |     | H   |    |        |        |        |      |
| ATOM       | 513 | HG2  | GLU |     | 38 | 10.836 | 8.100  | 23.318 |      |
| 1.00323.99 |     |      |     | H   |    |        |        |        |      |
| ATOM       | 514 | N    | CYS |     | 39 | 15.296 | 7.821  | 23.445 | 1.00 |
| 15.84      |     |      |     | N   |    |        |        |        |      |
| ATOM       | 515 | CA   | CYS |     | 39 | 16.735 | 7.967  | 23.261 | 1.00 |
| 14.30      |     |      |     | C   |    |        |        |        |      |
| ATOM       | 516 | C    | CYS |     | 39 | 17.106 | 9.453  | 23.273 | 1.00 |
| 22.31      |     |      |     | C   |    |        |        |        |      |
| ATOM       | 517 | O    | CYS |     | 39 | 16.298 | 10.294 | 22.879 | 1.00 |
| 32.92      |     |      |     | O   |    |        |        |        |      |
| ATOM       | 518 | CB   | CYS |     | 39 | 17.148 | 7.337  | 21.929 | 1.00 |
| 18.08      |     |      |     | C   |    |        |        |        |      |
| ATOM       | 519 | SG   | CYS |     | 39 | 16.030 | 7.908  | 20.625 | 1.00 |
| 17.41      |     |      |     | S   |    |        |        |        |      |
| ATOM       | 520 | HN   | CYS |     | 39 | 14.753 | 7.462  | 22.714 | 1.00 |
| 24.87      |     |      |     | H   |    |        |        |        |      |
| ATOM       | 521 | HA   | CYS |     | 39 | 17.241 | 7.455  | 24.065 | 1.00 |
| 14.60      |     |      |     | H   |    |        |        |        |      |
| ATOM       | 522 | HB1  | CYS |     | 39 | 17.094 | 6.261  | 22.006 | 1.00 |

|            |     |     |     |    |        |        |        |      |
|------------|-----|-----|-----|----|--------|--------|--------|------|
| 27.71      |     |     | H   |    |        |        |        |      |
| ATOM       | 523 | HB2 | CYS | 39 | 18.158 | 7.630  | 21.689 | 1.00 |
| 34.91      |     |     | H   |    |        |        |        |      |
| ATOM       | 524 | N   | PRO | 40 | 18.293 | 9.804  | 23.715 | 1.00 |
| 27.27      |     |     | N   |    |        |        |        |      |
| ATOM       | 525 | CA  | PRO | 40 | 18.728 | 11.230 | 23.766 | 1.00 |
| 47.66      |     |     | C   |    |        |        |        |      |
| ATOM       | 526 | C   | PRO | 40 | 19.039 | 11.786 | 22.379 | 1.00 |
| 71.54      |     |     | C   |    |        |        |        |      |
| ATOM       | 527 | O   | PRO | 40 | 19.766 | 11.173 | 21.596 | 1.00 |
| 87.70      |     |     | O   |    |        |        |        |      |
| ATOM       | 528 | CB  | PRO | 40 | 19.980 | 11.190 | 24.649 | 1.00 |
| 53.85      |     |     | C   |    |        |        |        |      |
| ATOM       | 529 | CG  | PRO | 40 | 20.547 | 9.825  | 24.437 | 1.00 |
| 46.04      |     |     | C   |    |        |        |        |      |
| ATOM       | 530 | CD  | PRO | 40 | 19.346 | 8.899  | 24.207 | 1.00 |
| 25.70      |     |     | C   |    |        |        |        |      |
| ATOM       | 531 | HA  | PRO | 40 | 17.969 | 11.832 | 24.242 | 1.00 |
| 58.04      |     |     | H   |    |        |        |        |      |
| ATOM       | 532 | HB1 | PRO | 40 | 19.713 | 11.322 | 25.687 | 1.00 |
| 67.93      |     |     | H   |    |        |        |        |      |
| ATOM       | 533 | HB2 | PRO | 40 | 20.688 | 11.953 | 24.345 | 1.00 |
| 70.99      |     |     | H   |    |        |        |        |      |
| ATOM       | 534 | HG1 | PRO | 40 | 21.097 | 9.503  | 25.309 | 1.00 |
| 65.91      |     |     | H   |    |        |        |        |      |
| ATOM       | 535 | HG2 | PRO | 40 | 21.195 | 9.823  | 23.567 | 1.00 |
| 54.99      |     |     | H   |    |        |        |        |      |
| ATOM       | 536 | HD1 | PRO | 40 | 19.038 | 8.439  | 25.134 | 1.00 |
| 24.22      |     |     | H   |    |        |        |        |      |
| ATOM       | 537 | HD2 | PRO | 40 | 19.581 | 8.151  | 23.466 | 1.00 |
| 26.94      |     |     | H   |    |        |        |        |      |
| ATOM       | 538 | N   | GLY | 41 | 18.480 | 12.953 | 22.091 |      |
| 1.00105.24 |     |     | N   |    |        |        |        |      |
| ATOM       | 539 | CA  | GLY | 41 | 18.695 | 13.604 | 20.804 |      |
| 1.00147.55 |     |     | C   |    |        |        |        |      |
| ATOM       | 540 | C   | GLY | 41 | 20.156 | 14.001 | 20.625 |      |
| 1.00161.74 |     |     | C   |    |        |        |        |      |
| ATOM       | 541 | O   | GLY | 41 | 20.718 | 13.873 | 19.538 |      |
| 1.00244.37 |     |     | O   |    |        |        |        |      |
| ATOM       | 542 | HN  | GLY | 41 | 17.915 | 13.387 | 22.761 |      |
| 1.00121.79 |     |     | H   |    |        |        |        |      |
| ATOM       | 543 | HA1 | GLY | 41 | 18.079 | 14.488 | 20.747 |      |
| 1.00184.40 |     |     | H   |    |        |        |        |      |
| ATOM       | 544 | HA2 | GLY | 41 | 18.414 | 12.925 | 20.015 |      |
| 1.00157.34 |     |     | H   |    |        |        |        |      |
| ATOM       | 545 | N   | LEU | 42 | 20.761 | 14.493 | 21.704 |      |
| 1.00162.48 |     |     | N   |    |        |        |        |      |
| ATOM       | 546 | CA  | LEU | 42 | 22.162 | 14.923 | 21.677 |      |
| 1.00191.48 |     |     | C   |    |        |        |        |      |
| ATOM       | 547 | C   | LEU | 42 | 23.034 | 13.958 | 22.471 |      |
| 1.00166.66 |     |     | C   |    |        |        |        |      |
| ATOM       | 548 | O   | LEU | 42 | 22.586 | 13.358 | 23.448 |      |

|            |     |      |     |    |        |        |        |  |
|------------|-----|------|-----|----|--------|--------|--------|--|
| 1.00251.38 |     |      |     | O  |        |        |        |  |
| ATOM       | 549 | CB   | LEU | 42 | 22.288 | 16.325 | 22.282 |  |
| 1.00307.99 |     |      |     | C  |        |        |        |  |
| ATOM       | 550 | CG   | LEU | 42 | 21.361 | 17.301 | 21.547 |  |
| 1.00452.28 |     |      |     | C  |        |        |        |  |
| ATOM       | 551 | CD1  | LEU | 42 | 21.467 | 18.682 | 22.202 |  |
| 1.00681.24 |     |      |     | C  |        |        |        |  |
| ATOM       | 552 | CD2  | LEU | 42 | 21.767 | 17.398 | 20.065 |  |
| 1.00527.46 |     |      |     | C  |        |        |        |  |
| ATOM       | 553 | HN   | LEU | 42 | 20.252 | 14.572 | 22.537 |  |
| 1.00195.47 |     |      |     | H  |        |        |        |  |
| ATOM       | 554 | HA   | LEU | 42 | 22.517 | 14.952 | 20.657 |  |
| 1.00229.77 |     |      |     | H  |        |        |        |  |
| ATOM       | 555 | HB1  | LEU | 42 | 23.309 | 16.664 | 22.189 |  |
| 1.00342.49 |     |      |     | H  |        |        |        |  |
| ATOM       | 556 | HB2  | LEU | 42 | 22.016 | 16.289 | 23.327 |  |
| 1.00335.33 |     |      |     | H  |        |        |        |  |
| ATOM       | 557 | HG   | LEU | 42 | 20.342 | 16.948 | 21.620 |  |
| 1.00427.79 |     |      |     | H  |        |        |        |  |
| ATOM       | 558 | HD11 | LEU | 42 | 20.657 | 19.307 | 21.857 |  |
| 1.00909.71 |     |      |     | H  |        |        |        |  |
| ATOM       | 559 | HD12 | LEU | 42 | 22.410 | 19.135 | 21.935 |  |
| 1.00706.80 |     |      |     | H  |        |        |        |  |
| ATOM       | 560 | HD13 | LEU | 42 | 21.408 | 18.576 | 23.275 |  |
| 1.00858.82 |     |      |     | H  |        |        |        |  |
| ATOM       | 561 | HD21 | LEU | 42 | 21.322 | 16.582 | 19.516 |  |
| 1.00631.69 |     |      |     | H  |        |        |        |  |
| ATOM       | 562 | HD22 | LEU | 42 | 22.843 | 17.349 | 19.977 |  |
| 1.00628.06 |     |      |     | H  |        |        |        |  |
| ATOM       | 563 | HD23 | LEU | 42 | 21.417 | 18.336 | 19.652 |  |
| 1.00656.75 |     |      |     | H  |        |        |        |  |
| ATOM       | 564 | N    | THR | 43 | 24.286 | 13.818 | 22.048 |  |
| 1.00178.52 |     |      |     | N  |        |        |        |  |
| ATOM       | 565 | CA   | THR | 43 | 25.218 | 12.927 | 22.729 |  |
| 1.00240.84 |     |      |     | C  |        |        |        |  |
| ATOM       | 566 | C    | THR | 43 | 25.584 | 13.499 | 24.103 |  |
| 1.00372.31 |     |      |     | C  |        |        |        |  |
| ATOM       | 567 | O    | THR | 43 | 25.602 | 14.718 | 24.278 |  |
| 1.00500.13 |     |      |     | O  |        |        |        |  |
| ATOM       | 568 | CB   | THR | 43 | 26.485 | 12.771 | 21.881 |  |
| 1.00354.13 |     |      |     | C  |        |        |        |  |
| ATOM       | 569 | CG2  | THR | 43 | 26.107 | 12.290 | 20.480 |  |
| 1.00463.04 |     |      |     | C  |        |        |        |  |
| ATOM       | 570 | OG1  | THR | 43 | 27.148 | 14.024 | 21.789 |  |
| 1.00508.50 |     |      |     | O  |        |        |        |  |
| ATOM       | 571 | HN   | THR | 43 | 24.590 | 14.324 | 21.265 |  |
| 1.00229.59 |     |      |     | H  |        |        |        |  |
| ATOM       | 572 | HA   | THR | 43 | 24.752 | 11.964 | 22.845 |  |
| 1.00249.90 |     |      |     | H  |        |        |        |  |
| ATOM       | 573 | HB   | THR | 43 | 27.143 | 12.050 | 22.337 |  |
| 1.00481.58 |     |      |     | H  |        |        |        |  |
| ATOM       | 574 | HG1  | THR | 43 | 28.054 | 13.861 | 21.516 |  |

|            |     |      |     |   |    |        |        |        |
|------------|-----|------|-----|---|----|--------|--------|--------|
| 1.00624.31 |     |      |     | H |    |        |        |        |
| ATOM       | 575 | HG21 | THR |   | 43 | 25.434 | 11.449 | 20.558 |
| 1.00650.95 |     |      |     | H |    |        |        |        |
| ATOM       | 576 | HG22 | THR |   | 43 | 26.999 | 11.989 | 19.949 |
| 1.00580.73 |     |      |     | H |    |        |        |        |
| ATOM       | 577 | HG23 | THR |   | 43 | 25.622 | 13.091 | 19.942 |
| 1.00571.99 |     |      |     | H |    |        |        |        |
| ATOM       | 578 | N    | PRO |   | 44 | 25.885 | 12.667 | 25.077 |
| 1.00488.39 |     |      |     | N |    |        |        |        |
| ATOM       | 579 | CA   | PRO |   | 44 | 26.261 | 13.143 | 26.439 |
| 1.00760.13 |     |      |     | C |    |        |        |        |
| ATOM       | 580 | C    | PRO |   | 44 | 27.695 | 13.663 | 26.468 |
| 1.00735.36 |     |      |     | C |    |        |        |        |
| ATOM       | 581 | O    | PRO |   | 44 | 28.117 | 14.310 | 27.426 |
| 1.00999.99 |     |      |     | O |    |        |        |        |
| ATOM       | 582 | CB   | PRO |   | 44 | 26.101 | 11.892 | 27.307 |
| 1.00999.99 |     |      |     | C |    |        |        |        |
| ATOM       | 583 | CG   | PRO |   | 44 | 26.413 | 10.760 | 26.385 |
| 1.00856.94 |     |      |     | C |    |        |        |        |
| ATOM       | 584 | CD   | PRO |   | 44 | 25.906 | 11.190 | 25.002 |
| 1.00548.09 |     |      |     | C |    |        |        |        |
| ATOM       | 585 | HA   | PRO |   | 44 | 25.579 | 13.909 | 26.772 |
| 1.00939.00 |     |      |     | H |    |        |        |        |
| ATOM       | 586 | HB1  | PRO |   | 44 | 25.085 | 11.810 | 27.665 |
| 1.00999.99 |     |      |     | H |    |        |        |        |
| ATOM       | 587 | HB2  | PRO |   | 44 | 26.794 | 11.913 | 28.139 |
| 1.00999.99 |     |      |     | H |    |        |        |        |
| ATOM       | 588 | HG1  | PRO |   | 44 | 25.900 | 9.863  | 26.701 |
| 1.00999.99 |     |      |     | H |    |        |        |        |
| ATOM       | 589 | HG2  | PRO |   | 44 | 27.483 | 10.588 | 26.358 |
| 1.00853.53 |     |      |     | H |    |        |        |        |
| ATOM       | 590 | HD1  | PRO |   | 44 | 24.912 | 10.810 | 24.827 |
| 1.00602.45 |     |      |     | H |    |        |        |        |
| ATOM       | 591 | HD2  | PRO |   | 44 | 26.587 | 10.856 | 24.233 |
| 1.00463.32 |     |      |     | H |    |        |        |        |
| ATOM       | 592 | N    | ILE |   | 45 | 28.437 | 13.365 | 25.406 |
| 1.00518.33 |     |      |     | N |    |        |        |        |
| ATOM       | 593 | CA   | ILE |   | 45 | 29.824 | 13.794 | 25.309 |
| 1.00582.79 |     |      |     | C |    |        |        |        |
| ATOM       | 594 | C    | ILE |   | 45 | 29.905 | 15.295 | 25.054 |
| 1.00795.93 |     |      |     | C |    |        |        |        |
| ATOM       | 595 | O    | ILE |   | 45 | 29.267 | 15.815 | 24.138 |
| 1.00898.75 |     |      |     | O |    |        |        |        |
| ATOM       | 596 | CB   | ILE |   | 45 | 30.521 | 13.044 | 24.172 |
| 1.00474.41 |     |      |     | C |    |        |        |        |
| ATOM       | 597 | CG1  | ILE |   | 45 | 30.521 | 11.545 | 24.480 |
| 1.00516.90 |     |      |     | C |    |        |        |        |
| ATOM       | 598 | CG2  | ILE |   | 45 | 31.964 | 13.537 | 24.042 |
| 1.00760.75 |     |      |     | C |    |        |        |        |
| ATOM       | 599 | CD1  | ILE |   | 45 | 30.973 | 10.769 | 23.242 |
| 1.00566.81 |     |      |     | C |    |        |        |        |
| ATOM       | 600 | HN   | ILE |   | 45 | 28.044 | 12.842 | 24.676 |

|            |     |      |     |   |    |        |        |        |
|------------|-----|------|-----|---|----|--------|--------|--------|
| 1.00395.72 |     |      |     | H |    |        |        |        |
| ATOM       | 601 | HA   | ILE | H | 45 | 30.325 | 13.565 | 26.235 |
| 1.00711.06 |     |      |     | H |    |        |        |        |
| ATOM       | 602 | HB   | ILE | H | 45 | 29.995 | 13.224 | 23.246 |
| 1.00477.81 |     |      |     | H |    |        |        |        |
| ATOM       | 603 | HG11 | ILE | H | 45 | 29.523 | 11.233 | 24.753 |
| 1.00624.28 |     |      |     | H |    |        |        |        |
| ATOM       | 604 | HG12 | ILE | H | 45 | 31.197 | 11.345 | 25.299 |
| 1.00744.84 |     |      |     | H |    |        |        |        |
| ATOM       | 605 | HG21 | ILE | H | 45 | 32.430 | 13.547 | 25.016 |
| 1.00920.57 |     |      |     | H |    |        |        |        |
| ATOM       | 606 | HG22 | ILE | H | 45 | 31.967 | 14.537 | 23.632 |
| 1.00999.99 |     |      |     | H |    |        |        |        |
| ATOM       | 607 | HG23 | ILE | H | 45 | 32.512 | 12.878 | 23.387 |
| 1.00865.46 |     |      |     | H |    |        |        |        |
| ATOM       | 608 | HD11 | ILE | H | 45 | 30.933 | 9.710  | 23.446 |
| 1.00658.89 |     |      |     | H |    |        |        |        |
| ATOM       | 609 | HD12 | ILE | H | 45 | 31.986 | 11.050 | 22.992 |
| 1.00734.30 |     |      |     | H |    |        |        |        |
| ATOM       | 610 | HD13 | ILE | H | 45 | 30.320 | 11.001 | 22.413 |
| 1.00675.84 |     |      |     | H |    |        |        |        |
| ATOM       | 611 | N    | ALA | N | 46 | 30.692 | 15.987 | 25.871 |
| 1.00999.99 |     |      |     | N |    |        |        |        |
| ATOM       | 612 | CA   | ALA | C | 46 | 30.849 | 17.430 | 25.726 |
| 1.00999.99 |     |      |     | C |    |        |        |        |
| ATOM       | 613 | C    | ALA | C | 46 | 31.808 | 17.752 | 24.584 |
| 1.00999.99 |     |      |     | C |    |        |        |        |
| ATOM       | 614 | CB   | ALA | C | 46 | 31.382 | 18.029 | 27.028 |
| 1.00999.99 |     |      |     | C |    |        |        |        |
| ATOM       | 615 | OT1  | ALA | O | 46 | 31.335 | 17.957 | 23.479 |
| 1.00999.99 |     |      |     | O |    |        |        |        |
| ATOM       | 616 | OT2  | ALA | O | 46 | 33.002 | 17.788 | 24.832 |
| 1.00999.99 |     |      |     | O |    |        |        |        |
| ATOM       | 617 | HN   | ALA | H | 46 | 31.177 | 15.519 | 26.583 |
| 1.00999.99 |     |      |     | H |    |        |        |        |
| ATOM       | 618 | HA   | ALA | H | 46 | 29.886 | 17.867 | 25.508 |
| 1.00999.99 |     |      |     | H |    |        |        |        |
| ATOM       | 619 | HB1  | ALA | H | 46 | 31.698 | 19.047 | 26.853 |
| 1.00999.99 |     |      |     | H |    |        |        |        |
| ATOM       | 620 | HB2  | ALA | H | 46 | 32.222 | 17.446 | 27.375 |
| 1.00999.99 |     |      |     | H |    |        |        |        |
| ATOM       | 621 | HB3  | ALA | H | 46 | 30.601 | 18.019 | 27.775 |
| 1.00999.99 |     |      |     | H |    |        |        |        |
| ENDMDL     |     |      |     |   |    |        |        |        |
| END        |     |      |     |   |    |        |        |        |
